# Supplementary material for: Evolutionary Conservation and Diversification of Five Pax6 Homologs in the Horseshoe Crab Species Cluster
Source: MDPI journal article supplement (doi:10.3390/arthropoda2010007), 2024-03-04
Supplement: s1 [file s1]

>CM024341.1:c60556197-60514128 Tachypleus gigas isolate IMCB\_SINCHF\_001  
chromosome 4, whole genome shotgun sequence

TCCGATTTTACTCAAGTGTAAATTTTGAAGCCTTCTTTTCTTTTTTCTTCTTCATAGCTAATGAATG  
ATGCTACTCTTCCCCCAGGACACAGCGGTATTAACCAGTTGGGAGGAATCTACGTCAACGGACGGCCCT  
TACCAGACTCCACACGACAGAAGATTGTAGAAGTGGCCACAGTGGTGCTAGACCCTGCGATATTTACG  
AATCCTTCAGGTGTCTAACGGCTGCGTTTCCAAAATCCTAGGCCGATATTACGAGACCGGGTCCATTTCGG  
CCCCGGGCCATCGGTGGGAGTAAACCTCGAGTGGCAACTCCCGATGTAGTGAGCAATATCGCCCAATACA  
AAAGGGAATGTCTTCTATTTTGCCTGGGAGATTGAGATAGGTTGTTGTCTGATGGGATATGCACTAA  
CGACAACGTCCCAAGTGTAAAGTTTGAAGATTTTGTTAACATTCTTGTAAATTATTTCTGGTTACATAATTA  
TAATAGCAAACCTAGTAATTATCGATACCTGTAGAAAGTCGACATTTTCATGAGGCATTCTTTAATTTGAA  
ATCAAATAGACTGAACACATTTACTAATTCCATTTCCAGCAAAAACAAACAAACAAAACAAAAATGAATG  
AACAAGGTATCAGGTCTTTTCTGATGAGGCCTGGCATGGCCTAGCGCGTAAGGCGTGCACTTCGTAATCT  
GAGGGTCGCGGGTTTCGCGCCAGAGTTGCGCCAAACATGCTCGCCCTCCAGCCGTGGGGGCGTTATAATG  
TGACGGTCAATCCCACTATTTCGTTGGTAAAGAGTAGCCCAAGAGTTGGCGTTGGGTGGTGATGACTAGC  
TGCCTTCCCTCTAGTCTTACACTGCTAAATTAGGGACAGCTAGCACAGATAGCCGAGTAGCTTTGTGCGA  
AATTCAAAAAACCAAAACCAAACTTTTCTGATGAACCTGGGTGTGTGTTACTAGTCTTCGTGAGACGTGCT  
TGGGTGGGTGTTGTGTAAGTCTTCTGTAAAGATGCATCTGTATTTGTGTTACTGGCCTTCTGTAGCT  
GTACCTGGGCTTGTTACTGGTCTCGTTTAATCTCTTTAACCTAAAATCACGGATTTATTGCAAAGAT  
ATTGTCAATTTGGGAAGTAATTTTGATTCAACAAGAGGAAATCCAGCAGTCCAATCTGTCAATGAGTAT  
TAGTTTAAATTAAGGTTCAAACCTTTGCTTTGACAAAAAACAAAGCAAATTAATAAAAAACAAACGACT  
TTTTTTTTTATATAAATGTTGATGAAATGTCTTTCCAGTTCAAGGATACCTTCAACCCTGATCCATTCCATT  
TTGACCTTTTTCGCTTTAATAATAGGTTTTAACATTTTTCGTTACGCCGAAAACATTACCATGTTTAGCA  
CAAACAATACTAAAAGTAAATATTTTTTAACTACTGATAATAACTTTTCGCTGGTTGAGGTCTGATCACTC  
GTAGTTAAGTTTCTAGCTACTGAAAGATCTAAGACGAGCAAAATGGTAACATCCTGAAGAACAAAGGTG  
CTTGTTCTCACTGTTGGTTTTATTTTTCGCTTTTGTCTTATTTTAATGGGCTCGGCATGGCGAGATGGTT  
AAAGCACCTTACTCGTAATCCAAGAGTCACGGGTTCGAATTCCTGTCACGCCAAACATGCTCGCCCTTTG  
AGCCGCTAGGGCGATATAATGTTACAATTAATTACATTATTTTGGTAAAACAGTAGCCTAAAAGTTAGC  
AGTGGGTAGTGATGACTATCTTTCTTCCCTTTAGTCTTACACTGCTTAATTAGAGACGGCTAGCTCAGAT  
AGCCCTCGTGCAACTTTGGAATGCGATTTATATTTCTGATCAACTTAACACGAATTTTCATCGTAAATCTA  
TCCACATAATTCTGATCACTTCTAAGTTTAACATCACGATAAACGGATGGACTCTATCCACAACATTTG  
AATTTCTTTTAAATCATACCATAACAACCTGACTCTCGCAGCTGAAACTACAATAAACATGACTTTCTGA  
CATTTTCCCGAGTACTATTTTAGTTCTAAAAAGAAGTATTCTATACGTACATTACATTGTCTTTACAAG  
GATATTGACAAACGAAGAGTTGGGGTAGATAATTAATTAATTAATTTTCAAATGAAAATTTCTTTATAAG  
AGGTGAACCGATGAACATAATAGTTTGAATATCTAATACTAAGGTATCATTGCAACGGCTTTTATTATT  
TAACAACTGAATTAATACTAAATACTATTTAATAATTAATAACTGATAACTAATTTTAATACTAAA  
AAAACCTCCACTAGTTTATGTGCGAATGATTTCCAGTTTATAGGTTAAACAATGATTTTTTTCTCTAGTT  
TTGGTTGGTTTCTTTCGAATTTTCGCGCAAAGCTACACTAGGGCTATCTGCGCTAGCTCTCCCTAATTTAG  
CACTGTACGACTAGAGGGAAGGCAGCTAGTCATGAACCCCTACTGCTAACTCTTGGGTTACTCTTTTGCC  
AACAGATAGTGAGATTAACCGACACATTATAACACAGCCACGGCTGAAAGGGCGAGCATGTTTGGTGTA  
CAGGGAATCGAACCCGCGATCCTCAGATGTGCCTTAATCACCTGGCCATGCCGACCTTCTCTTTTAGTA  
CAGCTGATATTATTCGTTCTAATAGCATTCGTTTCTCGACTTCGTTAAAGGTACTCAGAACGTACTGTGA  
AAACGATTAATATCTAATAATAGGTGCTCTTCATAAGCAAACATTTACCGAGTTTTATATCTCTTACACT  
TTGAATGTTAAGGAAATAAAAGCGCTTTCTATGACCTATGACTTTTTAAGCATACTGGTATTAATACCAA  
CGAGGCAGTCGAAAGTTTAAATCTCCCATTCCTGGGGTTCCTGTAATGGAAAGTCTGATATTACTGTTTT  
CTAACGCTACTTGATGAAAAGTTAAGCCTTTCAATTGCACAGTTGTTATTCCTTCTCAGATTATAATTGCA  
TTCAAGGCTTAAATGACTGTTGCTACGCTACGCTGTACATGTTGCAGCAGGGCATCTGGTTTTGTCAT  
GCAGTGAACTAACATCAAATTATTAGACATTTGAGTCTTCTTTTTTTGTACGTTATTTGTAATGGATTT  
GCCATACTTATTTTCCAAATCAGAATGTATCTTTTATTTACGTAACAAAATTATACCAATTACTCATTTT  
CAGGAATAATTGTTTTGGTGTTGTTTTTTTTTCAGCCACGAGTTTCAATTTATATTCATTCAACATTATAT

TCAACGGGAATAGGTAACAGAGAAATCTCTAACAGTTTAATTTTCGTAAAATAATGACTCACACAAAAGTCA  
AATTATATTTAATTGCATGAACGGCGATATCGTAGCCAAATAAACAAACTCGAGATGACTTGCATTAATC  
ATAAACACAGTAAGTTTTGATATCACTCGTTTAAACGTTGAAAGCTGACGAAAATAATAGGCCTAATGT  
TAGTTATGAAAAATCACATTATACTACAGATGTGTTTTTTTCTTATATTTTTCTTGTTATTCCATGCGT  
ATCGCAAATCAGTTTTTTTTTTGTTTTTTTTTAGAAATTCGCACAAAGCTACTCGAGGGTTATCTGTGC  
TAGCCGTCCCTAATTTAGCAATGTAAGACTCGAGGAAAGGCAGCTAGTCATTAACACCCACCGCCAGCTC  
TTGGGCTACTCTTTTACCAACGAATAGTGGGATTGACCGTCACATTATAACGCCCCCAGGGCTGAAAGGG  
CGAGCATGTTTGCGCGACATTCTTGTTATTTGTATTTGTATTTATGGTAAAAAGTACTAAGTCTATTTG  
CTGCAAGTTCCTAATTTTGAACCTCTGACCACAGGGTAAACAACCTAGTCAACTGATCTCTAACATTGTTT  
TCCGATATGAAGACTTCCATTAGAGGGACGAAAGCACACAAATAAAAGTATTTTAAACGTAAAGAAATGTC  
CGTGATAATTCTATATATTATTTTTCTACGTTATGAATCTTAAACAACAATTATTCACCATCGGTGCTA  
ATCGATTGACTGTCACTCTTATTCCAAAAATTTAAAGAGTCGGTAATACAATGGTATCGCACTGGTTTGA  
AACCAGCTCTGAAATCCAGGGCGTTCGTCTCACCCAGTCATACCTTTGCCCTACCACTGTTGCGGTCTTT  
CGTTAATATCAAAATCTTAAGTTGCGGCGAACGAGATATCAGGCAAACAACCTATCCATTTTTACGCGGT  
TCTAATTTGAATTCTTAAACACATTATTAATTGAGAAAAATGGGAAAAATAGAAATTGATTTTACGATA  
CATGTTTTTTTTATTAATAACGTTACACTTAATGGTAAATTTTGTGACTTACACCAAGTCATATATATATA  
TATATCGATACGTAAGTAACGAGAGTAGCACGTGACTTACGCAATGACATGGTTATTTGTCTATGTCGTG  
ATTTTCATTATGTTAAGTATAGGTGTTTTTGAGGGCGATAAAAAATATTTGATATGACTGTCGTTTAAAGGA  
AGTATTTATTTAATATGTACACAGACTGGCCCAATTCCAAAGTTAATCTCATATTTCAAAGGTTTAGACT  
AATATAACTAACTTCATTGACGTGCAGATGGCAGTAAAAGGGAAAGATATTACGAACCGAAAGGTGCGC  
TTTTTAAACTTTTGCTTATTATTACTTATTAATAATAGGGCCTGGTAGTTAGGGCGCTTAAACGTATAATC  
TGAGGATCGCGGGTTCGAATCCCTGTCAATCAACGTGACAGCAGAGAGGATATTAAATTGTGACAGTC  
AATTCACCATTCATTGGTAAGAGAGTAGCCCAAGAGTTGGCAGTGAGTAGTGACGACTGGCTACATTCC  
CTCTTGCTTACCCTGCTAGATTAGGAACGACTAGTACAGATAGCCTTCGTGTAGCGAGAAATTGAAGAC  
AAACCAAACGCTTAATAGCGTATCAGAGTTTGTCTTGTTTGTATACCGTTAAAGCTCAAAAGTACCT  
GCGTTTAATTAATTTTAAAGCTGATTTTTTTTTTATAACAATTCGCAACAAGATCCAACCAAATAAATCT  
TTTCATATTTGTTGATAATTTTTACGACAGAGGGGGACACATAAGAATAGGAAGGTATGGACTTGAGCTC  
ATCTGACCAACCACCTCCTTTGGAAGTATCACTGTTAAATTAGTTAGTGTCTACCAAAGTGTCTCAGTGT  
CTTGCGTCACTTATATAGGAAATTATTACCAATATAATGACTATTGTAATTAGGTGTTTTGTTTTTTTTTA  
GCAGCTCAACTTCTCTGTTCAAGTTGAAAAATTTAAAATTTCTTTAATTTACGTTTCAAAAAAGATCTCGCG  
TCTGCGCTTGCGTACAATAATTTAAGATTCTTTGTAATTCAACCAAACCAATTTAACACGCTTGTAATT  
TACAGGCTCCATCAGTTTAAAGTTTTAATGGTCTTAGCATTTACTTCGGATAACAGTCACTATCGGCGCT  
CAATATCTATTGTATACATATGCATACATAAAGTATATATTAAGAAAAATGTTCCATGTATAGAGAAA  
CGTTATTTCTCTGTGTAATAATATATGTATTCCACATTATATGTGCGCCAAAAATTTAAATTTTGTGAGC  
GTTTCCTGAAAGTCATTTGTGTCAGTTTGCTTAGAGTCCCATGAAGTGAGATTGGACAGCGTTTCGAAGAA  
ACGTTAAAGAAATCAATATTTGCTTGCGTAGAACATCTATTGCATAACTCGTATCATCATAGAAGTTAATC  
TGTTTTTCATTATCATATATTTTTTTATTTATTTCAACGTTTGAATACAATCGTTTAGAGGCGTTAGTCTAT  
AAAAGGTGATTCTGCGGTAAACATTTACCATCGATTCTTTGTAGATCAATGTTTCGATATAAGAAGTTT  
AACCACAGTGTCTCCTAGATGTAAGCCCTCTATAGGATGTACGCACCGTGCTATTCTACCCGTGTTTTTA  
CTCTCTGGGCTCTAAGTAATCGGTATCTTGCTTCTGCTAACGACAACAACGAGATTGCTGCGTTCCCTAG  
CGGTCACAGTAAACCAATTTGTGGCGGTAAAACGAGAAGCTATCTCAATTTCCAGCAACGGTAGGTGGGA  
ACTAACTAATTTTTGCCGCCACTTAACGAGCTTATTTCACTACTCGTGATACCAATAACAATGCTGGGAA  
GTGAGAAAGTGGAGAAGGTACCAATGAACACTTGCAATTCGTTTCAGCGTTACAGGCTAAGTGAATTACAC  
TAGTCTTGCGGATAGTTAGTTGAACATGATGGTCAGTTCTGCTCCTCGACTGACACTTAAAGTGTAGCTG  
TTACCTAATTCACAATAATAGGACCTGAACTTTAGTACCTTGTTTCTTGAATTTTGATTGAAGCAAGGA  
TAGACCGAAGCGTTTAAAGATTTTTGGTTCAATTAAGATGTTTCGTATAGATTGATTTGTTCAAAGTGTGC  
AGACAGAAATTTCTATCGCGATTTGAACGTAAACATCTGCGTTTATAAATTTCTAGTATTGACAATGCGTCG  
AATACAAAGTTTTTGTAACTGAGCTGCGCAATATCACAACGAGAAACATATAATGCTTACTTTTTGAGTCT  
TTTCAATATAAGGGACTCGAAAAAAAACAACATTATATTATTGTTTGTGTTGAATTTGCGCAAAACTA

GTTACTCAAGGTTATCTGCGCTAGTCGTCCCTAATTTAGCAGTGTAAGGCTAGAGGAAAGGCAACTAGTC  
ATCACCACCCACCGCAATTCTTGGGCTACTCTTTTACCAACGAATAGTGGGATTGACCTATCAAATATA  
ACGCCTCCACGGCTGAAAGGGCGAGCATGTTCTGTGCGATGAGGATTCGAACCTCGCGAGCTCTTCGATTG  
AACGCCTTACCCACCTGGCCATGCCGGGCTGTAAATTTATTAAATTTTCGAATTAAAAATTTAGGTC  
AGAAGTCGAGCTCGATCATTTTAAAAAGAAGCATAGAAAATACTGGTATTAATAAAACAATCAAGAAACG  
GGATAGGTTGATCAGCTTTTATTTCAATACAATATTTAATGTTTTTGTCTTTTATAAAGATAGGCTAAAA  
CAATTGTCAGTCTTAAAAATATTTTCTTCCAATATCTGAAAGTTACATGATTTTAATAATAGATAATTTT  
TAACAGTTAAGGTGTTTTATTAGAACTGTTTGAAATAGGTTGAAACGTGTTAGTTAAGGCAGAGTAGAA  
TGGAAGGAAATGTTATGGTTGTGAATATACTGACAAACCATGTTCTTTCCGTAATTTATAGCGCGAAGTT  
TCACAATGGGCTTGAAAAATCTCTTGCCACCGAGGATAATTGTATTTTAGCGTTGTAAGTTCAAATGGTAC  
TCAACTATGAGACAGTGCATAATTTACTTTAAACTGCTCCGTTTCTGATGTCAAACAATTCGTTTTATGT  
TTCGATTAAATAGTATTTTAATTACGTTATAATTTCTACCAGAATAACTGACGAAATTCACAATAACAAT  
TAAAATTAATGATAAATGATATTAAGTATGAGCAACAGATAAAAATAAAGGATTCAGTGGCTACTCGGTC  
ATCGGTCATCAGTTGGACACTGATGCTGCTATCAGTGTTATTGGTTTTTACGTTGTTGTATATCGACCTT  
GAAAATGACATATACACTTGATATGTGTTGAAACTAGAAAGTTTTATGAGATTACACATCAAACCTACCG  
GTGTATATTTAATTCATAGTTTCAAATAGTAACTAATTGAGAATAAAAAATTGCTTTATCACATTTTAT  
CAACAGCAAAAAAGTATTTTTAAACATTTCTGTTCTGTCAAACACACTTCTCATGTTTCACTTCCCTGTC  
AGATTCTTCTCGCTTTTATATTTGGTTTATAGTTATTATATACTTCTAGTGTCTCTCTTAACTGTCAGAT  
TCTTCTCGCTTTTATATTTGGTTTATAGTTATTAGATACTTCTAGTGTCTCTCTTAACTGTCAGATTCTT  
CTAGTTTTTGCATTTGGTTTATAGTTATTAGATACTTCTAGTGTCTCTCTTAACTGTCAGATTCTTCTAG  
TTTTTGCATTTGGTTTATAGTTATTAGATACTTCTAGTGTCTCTCTTCACTGTGAGTTTCTTCTGTTTT  
TGCATTTGATTTATAGTTATTAGATACTTCTAATGTCTCTTTTCACTTGAGTTTCTTCTAGTTTTTGTAT  
TTGGTTTATAGTTATTAGATACTTCTAATGTCTCTCTTCACTTGAGTTTCTTTTAGTTTTTGTATTTGGT  
TTATAGTTATTAGATACTTCTAATGTCTCTCTTCACTGTCAAATTCCTTCTCGCTTTTACATTTGGTTTAT  
AGTTATTAGATACTTCTAATGTCTCTCTTCACTTGAGTTTCTTCTAGTTTTTGTATTTGGTGTATAGTTA  
TTAGATACTTCTAGTGTCTCTCTTCACTTGAGTTTCTTCTAGTTTTTGTATTTGGTTTATAGTTATTAGA  
TACTTCTAATGTCTTCTTCACTGTCAAATTCCTTCTCGCTTTTACATTTGGTTTATAGTTATTAGATACT  
TCTAGTGTCTCTCTTCACTGTGAGATACTTCTGTTTCACTTCCATCAACATCAGACACTTCTGATATA  
GTTTGGTATCACTGTGAGACACTTCTGAGGTAGTTTGGTATTATTGTTAGATACTCCTGTTTCACTGTGT  
TATCAACGTTGGTAAAGAGTAGCCTAAGAGTTGGCGGTGAGTGGTGATGAGTAACTACATTCCCTTAA  
GCTTACTTTTGCTAAATTAGGAATGGCTAGGGCAGATAACACTCGTGTAGCTTTGCGCGAATTTCAAATAC  
AGATACATAAAATTATCAATGTCACATACTTCTGATGTAGTTTGTATCAATGTTAGATACTATTAGTTTAT  
TATTTTTAACAGACATATTTGTAGATAAACGTTTGGTTTCTAATAAGTTCTATGTGAATCTTCTGATTCA  
GTTTGTACCAGTGTGAGATATTTTTAAATGAGCTTAGACATTTATCTTCGCTAGATATACTTCTGTTT  
TACTACTGACTTGTATTAACCTTTCAACTAATCCTTATTTTATAATTAGGTCGTTACTACTGTCACATACT  
TCTATTAATTTTGTATTAACACTGTTAGATGTTTCTCGTTTACTTTTATTTGTGTTCCCTCGCTGAAAC  
AGTGGTAAGTCTACGATTTTCAAAGCTAAAATCAGGGGTTGATTTCTGTGCGTGAATACAGCAGATAGC  
CCGATACGGCTTTGCGATAAGCAAAAAACATACACTTTTATTTGTTTACTGTGTAAAAATATTATTGGTT  
TGCTATCACTGTTAGATATCCATTACTCTCTGTGATGTCCGGTGAAGATATTCCGTTTGAATTTATTAT  
AGCGAGTGTGCTTCATATAGAAATAATACATAAAGCTTTATAAATCTGTAGACTCACTCTGTACACCTC  
TTCATAGTGCCAGTTACTTACTGAATTACTTTAATTTATTATTATTGTGAGATATTCTAGTCTTATGTTT  
GATGTTGGATGTCAGTGTAGTTTTACTTTTTTATTATTGGATATGTTTTCACTCTGAATTACTTCTTAT  
GTTACATGTGGCTTATTGTTACTGTGAGTTACTTATAGTTTCAATTTGTTTGTGTTTACTGTGCATAT  
CTTTGGATCTGATTTCACTTCGTTTGTATTTACTGTGAGTTACTTCTGTTTTACGTTTAAACTCGCT  
TTACATTTTCTGTTATCTATATATTTATAGAAGTTGCTAGTTGTTATTTCCCTCTTTATTAATTAATTA  
ATTAACTGATTTCCTTTGTTGTGGATGTTTTACATTTTCAATTTTCTGTTATCTATATATTTATAGAAGTT  
GCTAGTTGTTTATTTCCCTCTTTATTCATTAATTAATTAAGTGGTTCCTTTGTTGTGGATGCTTTACAT  
TTTATTTTTCTGTTATCTATATATTTATAGAAGTTGCTAGTTGTTATTTCCCTCTTTATTAATTAATTA  
ATTAACTGTTTCCTTTGTTGTGGATGCTTTACATTTTATTTTTCTGTTATCTATATATTTATAGAATTT

GCTAGTTCGTTATTCCCCTCTTTATTTCATTAATTAACATAAGTGGTTCCTTTGTTGTGGATGCTTTCCGC  
GACAATCTGCAGTGTGTAAAAACGTAAAGTAAACTGCGTTCTGAAGATTGGTAGTTTTTCCAGTGACAAT  
GTCAATATTTCCACTGCAGACTCAACGCCACTACGTAAATTCTCCTATAACCAAACGAAAGAAAACATTT  
TTTTGCATATTATAGGCATGGCTAAGCTTGAATGTGATAACGTGATTACGCTTAGATATACGATACTCCC  
TCAATAAAACGTGATAAAATTTGACTTTGCGATTAGTTTAGATCAAATTGTGGGTAAATAACATTTGTTA  
GGAGTGGACAATAGCTTTAGTGTGCACACTCGTTTTAAAAAAGTGAAATCTATACTGCGATCCGAATAA  
AATCCTGTTTTCCGTTTATTATATAACGTGAATGTGTGGTAGGTACCATAACTGTGACATTTTTCTGTGAA  
AAAACGGCCTATTGGTATTTGATCTACGCACTCATATCGGGTCTTTTGGTGCGCAAAACACGTGTTGCC  
ATTTCGCAACCGTCTGTAAAAACTGTGGTTCCTGATGCTATTGCTTTATTGGCGCCCTTACTAAGGCAGGG  
AAACATGAAAACAGCCTTGGCAAATTACATTAGTTCTTAATGAAAAGCCGCGGGATGAATCTGTGAATTC  
TGTTCTCTGATTTTCCAAGTTCTAAAGTAATATAACAGCGTATATAAAGTGTTTGCTTGTCTGACTGTCTGG  
CGTCTCGTATACTTTATATAAATTACATTTTTAGAAGAAACAAACAAAACGCGCGTAGACTTGATAAATA  
TTTTTGTTCATCTGTTGTTGGAATATTAGAGTGACGTCACGTTGTCTGATTGGTCTGATATGAGTACGTT  
TTAAGGGCTTTTCTCAAGCTATACATGATCAGAACTGAGGATGTATCGAATGTGAGAAGGTATAAAAAAT  
ACATATTATTGAAGGAATTTATATCTTTTCTCAAACCTCACAAAGAATTTTTTTCAGTGTGTTGTTAAGCC  
TCGCGACCTACACGTCAATTAATAATGCAATTAATTATTCGTATTCATCATATGCATATTATGTCTTATA  
CTGGATCAGTGAAAACGTTTCCATCTTACGAGGCGAACTTTGAAGTTCGATTATTTCGGCCCAGCATGGC  
CAGATGGTTAAGGTGCTCGCCTCCTAATCAAGGGTCGCGGGTTGAATCCCCGTCACACCAAACCTACTC  
GCTTTTTTCAGCCGTGAGGCTGTTAATGTTACAGTCAATCCCCTATTTCGTTAGTAAAAGAGTAGCCCAAG  
AGTTGGCAATAGGTGGTGATGGCTAGCTGCCTTCCCTTTAGTCTTACACTGCTAAATTAAGGATGGCTAA  
CACAGGTAACCAATCTAACAAAAAACAATTATTACAGATTGACAAAGAGCAGATAGCCCTTTGTGTAGC  
TCTGCGTTAAAAACAATCACAAAAGCATATTTTGGCTATTTCTGTGTGATATAAACATAGAGATCACGGAC  
ATGTATTTTAGCTGGGTGTTTAAAGGAATATAAAATCAATTATTACATTTCAGAAGTTGTTCTTTCTGTA  
ATGAAACTGGAGGTAGAAAAATAAGACGTGTGAACAACTCGAGCACCATGTGAACTAGAAACAAGGAG  
TTGTGGCAGAAAAAATAGTGCCTTCGATAAAGGAATTCTCGATAACCGCGGCACCTCAGGCAGAATTA  
GAGTAAATTAATCTTAACACTTTTTCTTAATTCTTATTTTTATTAGCTATATTTGTGCGCCAACAATA  
CAAGTCGTGGGGCACGTGTATACTGGATCCGATTTTGTATTTCATCAGGATATCTACCAGGTTATTCTCA  
AGATGAAATCTTTAAGGCAATATTAGAGCAAACCTAATCTATGAACTTTGGACGTGTTTAAACACATCA  
ATCGAATGGGTTTCATCGCCTGATTCCAAAACCTGTAATTAGATCTGAAATCGGTCCAGAGACGACGATGC  
TATGAGTTCAAAGTTTATACTTGTAAACAAACAAAGACAATCTGAGCCGTTCAATAAGCCACTATGCCGC  
GACTAAAAGTAGTGCGTTTTGTTGGCGGCGTTTTATAAATTTAATTTTCAATTCCTTTAAAAAGATTTTTT  
TACGAGAATCCAACTCAATTATTCGTCTGCAAAGTTACTTCTTCTCTGAGTGGTTAAGTTTCTCGTCTGA  
TAAATACATTAGATTATCAGGGAAAGGCTTCCGTTTTTCATCGGTTTTCTTAGCTCATGTTTTGTATTG  
TTACTGGGGAACTACTGAACTCCACTTACAAACAATAACGAAACGCTCAAACACATAAGCCTCCAGTTACC  
CCTAATCCCCTCTCGAGTGGGACTTTTAAACGATCCAAAACGTCTTTAGACTCCAGGAAATCCAGTAAGAT  
TTTTCCAAGTCTATTTCGGTAAACTTCAAACACGGCGCTGTGTTGTGATAAGAGGTATGAATTTAAGAAGG  
CAAAAACCTTGATCCTCCAACCTGATATTCTGTAGTGGTCTCAATCGGCTCGAGGAGGGCTCCTATCATGTA  
GCAGAAGTTTTGGGTTAATTCTATTTAGCCTTGTTTGGTGACAAGAACGAACTTTTGTATCGGTTGGAGT  
ACCTTATTTCAGCGTTGTCTGGTCTCTAGCATGGCGACCAACGACGGCCTTGCTTCCAATAGTCCCACGTGA  
AATCCAGAATACTATAGAAGAATGCCTGTTAAGAAAAGATATTTCTTTACAGAGATCGCTTTGTGAAAGT  
CACTCGGGCAGGTTCTTCGGCTTTAGAGCGCATACACTGTGTTGCGATAAATGTATGGACTAGCATTA  
GCGCAGGTTGCAAAGACCTAAGGATGTAACAGTAGGCTTTGCTAAAGGCACGTGAAATAGCCGAACGACT  
ATTGAATGTTCAACTATAGAGGGTGGGTACATTTTGCCAAAGGAGTTGAACAATAGACATTGAACGCCAT  
GATACATTACAAGCCGGCTGACAACACCAACATTACCCTGTCTCGTGGATCCTCATTTTTGCAAAAAGAGACC  
ACTGGTGGTGGTTTTGTCTGTTCTTGCTACCATTGCTATGCCTCTTTAACACGAGTCAATAGAGGTC  
ACTGTTCTTTCAACTCCCATACGGGAAAGCGAGACGATAGAATATTTAACCCCTCGATTGCAGGAGAGG  
CAAATTTGTCACTTTATTCAACTTAAACAACGAAACATGAGATTGGATGGTTCAGATTTCAGAAAGTAA  
TAGACGACCATATATTAACTGCTCATTTTTCTTACAACCACTTTGTAAAAACACGCGGAAGTTGTCCA  
AAGAAAATGGGGAACACGTTTATTACAAAACATTATTTGTGGAGAGATTTTGTGAAAACGTTATAACAA

ACCTATAAACATTAAACCGAGAAATCCAAAAACATGGAATCCGAGTATAAAAAATGATCGAAGTTTTTTGA  
GTAATTTTTATTACTTTAAACAAAATCATAGTAAATTTAAATGCTTAGAAAAACAACCTTTTACACTCTAGG  
CATATATTTATATATATATTTTAACCAACGTTTCGCCTTTTCGTCTTCTTAGGTTAATATATACAACGT  
TTGATATTAGAATCGTCGTTAAATTGTAAACTGCTTGTAATGTTCCAATTCGCAACTCTGCTGTAATAT  
GAGTTAACAGTAGGAAAAGTTATTATACTTATTTAATTACTGTTTCAGTATTACAGCATAGTTATATACTA  
ACTATAGAACTATACTAATATATTACATATATAACTATTTTATAACATATAAGAATAAAGATAACTATAT  
GTTTATGATTAGCTAAAAACATAGATCGAAGGAAACAATAGCTGCTCAGAAACAATAACAAGTGGAAGCA  
AAGAATAAACAGTTTGTAAATAGTATTAACAATAAACTGTAAAGTTGTATGATACTCCAGAATACTCAAG  
TATTAAACTGAAAAATAACAGCGTATTGGTACGATGCGTTGTTTTATGATTAGTGGTTTAGTTACATGTAC  
CACCCATTGTCCCTGTTCACTTTTGGATTTTTTTTTTTGTTTAAAGGGTATAACTTCCATATATTTTCTGTC  
TTTAAATCTTTGGTTATTTGTAGAAAAACCCAGATACTAAAGAGGGAAACAAATATAAAGAAACGCAA  
AAAAACAACTACTTTATACAACAATAAAACCAAATTTAAATCAATATAAAGGAATACTTTATATCTA  
TACTAATTAATAACCTAACATCTAACTGTGACGCCTCCTACAATCTGGTACTCGTTTATATTCTCGTCTC  
TAAGACATGTATCCAACAACGGTCACTTGCAAACCTCTCTTTTCTTTATCTGAAGATGACCTAGAAAGGT  
CGAAATGATGTTTTCTCCTTATCAATAAGTGTGAACACCCATACCAGCCGTTCTGAGATACAAAACTTTA  
GATGGGCTTAGGTTTTCTGTGTTTGGGGTACCTTGTTTACATAGGATAGACTACGAAGTCTATCAAATCA  
TTTGTAATATATGTATGAGAAACCGGACGACCTGTTTACACGAGTATCTCAGAACACATCAGTGTGTTAT  
ATACAAGTGATCAACACAAAACCGTTCCAGCTGAACACATGGCACCCCTAAACACAGAAACCCAAACCCAT  
TTAAACTTTTATCTTAAAAACAACCATAAAATTTTAAATAGATAAAATATGTGGAAGCTATACTCATTAACA  
AAAAATATCCAAAAATGAACAGAGATAATGAATAGGTGGTACATGTAACATATTATAGTCCATTATATTT  
GTATATGTCTATAAAATAGTTACATATGTAATACGTTAGTATAGGTTATATAGTTTGTATTATAACTGTGC  
TGCAATATTAGAACAAATAGTAAAACAATTACAATAATTTATACATTGCTAGACGCACGTTTCGGCAGACT  
GGAGAAATAAAACATTACAAAAGCTGTGTATATTAATCTTGAGGAGCCGTAAAGGCGAACCGTTAGTTA  
AAATAATATATATACTTGTACATCTGAAGTGTAGGGGTGTTTTCTCCAACCGTTTTTACTACAAATTG  
TGAAAGACAACAACATTTTGAATATAACGAAAAATAAGCGTTAAGGTAACATATTCTAAATCACCTTTT  
CAAGCTTAGCCCCCTCCCATGTTACAGTGGCAGGTATGCGGACTTATACTGTTAGATAACCTGCGGTGG  
GCAAAGCGTAGATAATCCATTGGATATTTTTGTGCTCAATAACAAACAACAATTTCAAACATTGTGT  
TTGTTATGAATAATTACATACATTCTTTTTACTTATCATTTATGGTTTCGATTAAATTTACTGGCTATTAC  
TTCATTTTGCTTATAAGTAACGTGAACGAACGGAATGTTTTCAATAAAGAACCCTTTTCATTAGAACCGA  
AGACCCAGCTAATACCGTATCCATTGTTATGCAAATTTGTAAAATAGGATTTTCGTATTGGTTTTACAAT  
GTTTTTTTTCTTTTTTATTTCGGGGAAAGAAAAACCATTTGTTAATTCAAAAGAAGTCACTTCCGTGTTGCTT  
TAGAACCGCATTTTAATTGCAAATCTCCGCTGCACAATTCCTCAAAAATTCAATATTTTCGTGCGCCTC  
CACTGTACTACGCAGCGCTAGCACGCGAGCTCGAGCGAGCAGAGGGAAGACTGCAAACGTTTCTAGACAC  
GCTCAGTCAACAAAAGTGGAACCTCGACTTATGAGCGTGTACTCACACATGGAGACATCTACCTCCGAGGG  
AAAATTTGATCGTTGTATGAAATGCTAGGACTACTTTTATTTCTTTGGGATACAGATCTCTTGGTTCTG  
TTACGACAATTACGTTATCACATCTGTTCTTTCTCTTCGTGTTTCGTAGATACTGGTACAATTAAATCTG  
TTTGACTAGTCAGTCAATTTGATTATCTATTTAATTTAGGTTACATACATGTGCTTCCATTTATTTGAAG  
GTTTGTTTTTAACAAGCAGAAATTCGGTTAACAGTAAGAAACGAAGTGTAGTTACTACTACACCGTGCCCTT  
TGTGTCGATTCTAGTGAATTGCGTGATTAAACACTATCTCTCACATCGTTTGTGTTTGACGAGTTTGCAA  
CCAAATGAAATACAACTGTGTCTTCGTTTGAAACAGGAAATAACTATAGTCATGTATATGAATCTGATT  
ATACATTAGCTAAGTTATTGAGATTATTGTGGTTCATTTTATTTTCGTAAATTTTGTGTCGTTTTTTATA  
TGACTCTTCTCCACGATGGCTTATAATGCTATAAATCAGGTTTTGATCCCTGCAATGGGCATGACATTTCT  
ATAGCTTTACGTTTATCTGTAAAACAAACAAATAAACGTTCTTAATTCCAATCAAGTCACTTGTGACAGC  
AGTAAAAAAAACAACATTTACCAGTGAATTTAATTACCTGTCCTTAAGTTTCGGTTTTCCCATCATGT  
ACTTTTTGGCGTCGTACTAATTGCTTTTTCTTTTATATTTTAACTTGTGGTGCATTTCTAGAGCACTGAA  
AGAGATGCAAAGACCCATTTCGTTTGGTGCGCCAGGCGCAGACCCAGCATGGCCAGGTGGTTAAGGCGCTC  
GGATCGTAATCGTTGGTAAAAAGAGTAGTCCAAGAGTTGGCGGTGGGTGGTGATGAGTAGCTGACTTCCTT  
CTAATCTTACACTGATAAATTATGGAGGGCTAACGCAGATGGACCTCGTGTAGCTTTGCGCGAAATTGAA  
AAAAAAAACAAAACATCCGGCATTTCCAAAATTATACTGGATGTATTTGAACATAAATGCTAAAAACTTA

[illegible]

TCATGTATTTCATAAATTTACATAGTCTTCTGCTACATTAATAGTATTTCTATGAAGAAAGTTTGCCTCAC  
TCCTCAATGCAGAATATTTTCAGCTGTGAGATGTTTGAGGAGTTTCTTGCGATGTACAGCTCGTTTCAAGT  
CACCCACAGCATCTCAATGAGATTAAGATCTGGGCTTTGACTCGGCCATTCCAGGACTCTCCATTTCTT  
AGTTTTTCAGCCAGTCCTTGATGAATTTACTGGTATGTTTTGGGTCATTGTCTGTGTACAGGGTCCAGTTC  
TGCTTCAGTTTTAATTTTCGTACAGATGGTCTCACATGATCCTCAAGCACCCAGTAGATACACAATAGAA  
TTCATGGTGGATTCTATGATTGTGAGCTGTCCAAGTCCTGCTGCAGCAAAGCAGTATTTGGTTTTTCGCCA  
AACATGTCTTCTGTTCTGGTGTCCATATAATTCAATTCTGGACTCATCTGTCCAAAGAACATTATTCAG  
AAGTACCTTGTCTTTGTCTACATTCTCTCTGGCAAACCTTCAGTCTGGTCTTGATGTTTCTCTTAGAGAGC  
AAATATTTCTTCCCTTACACACCTCCCATGCACGTTAACTTGTACAGTCTCTTTCTGATTGTAGAGGCAT  
GCATTTTCACATCAACAGTAGCCATAGCCTGTTGTAGGTCCCGTGATGACATTTTATGGTTTGGGAGACA  
TCTTTTAGCATCTTGCGATCTGCTCTCGGGGTGAAGCTAGCTTAGACGAACAGACCTGGGCATGTTGGCA  
GTTGTTTTTGAAAGCCCTCCACTTGTGTTGACTATTTTCCGGACAGTGAAATGGCTGATTTCAAAATCCTTTG  
GGATCTTTTTTAAATCCCTTACCAGTCTCATAAGCTGCTACAATTTTCTTCTGAAAGCCTTAGACAGCTC  
TTTTGCTCTCACCATGGTGTCACTCTCACTTCAACAGTCAGGAGCACACCAAACCTGAATGTCTGAGGTTT  
AAATAGGGCAAGCCTCATTCAAAATGCTGAAGTAACGATCTTACTAATCATGTGCACCTGGTGTGATACA  
CCTGTGTGTGATTGAGCTATTTAAGTGGGAATGAATGTGGAGGTGTCTAACTTTTTCCCTCAGTTAGA  
ATATGCATTTTTGTAGAATTACATTTACAGAAGATCTTGAAAAGTCTTTTCTCAGTTTCAATTGTGTAG  
TTATATTCATATAATCTCTCAGTATTTTAAATATTGAGATTAAATATCTATATATCCAAAAATGTTACAA  
AAATACACAGGCTTTCATCGGGTGTCTCTAACTTTTTTACATGACTGTACATAGTGCTTGTGTTGTAGATGT  
CCAATCTTTAGAAAGGACATGATGTATTGTGTTACATTAAAATAAATGACTGAATCTTTAAAACTATTTA  
TTGTAGTAAAAATAAAATTTTCATTGGTTAAACATTGAAAATCTTAAGTTCGGTTAAAAAAATTTGGAATTT  
TTCTCTCTTTTTTTCAATAACGCAGGACTGGCAAGTCTAACAAGTGTTTGTCTAGTATAACGGTACTGTG  
AGGAACAGTTAACACTTACTGTTACAGATGATGCTTACAGTGGGTTTCATATACGGATAGGCTTGATATG  
CTAAGTAATAATGATGAAATTATTACTGAATACCATTTGTGACAACCTTCAGGCATCCTGTTCTGTGGAG  
AAACATTTGTGTTTCTGCTGCTAGTGAAACTCCTGTAGCGCTCCTACTGGCACAGCGACATGTCTGCAGA  
CTCAAACCTCTAAAAAACTGGTTGGCAGAGTACAGATAGCCCATTTGTGTAGCTTTGTGCTTACTTCTAAG  
CGAACATACTCCTGTAGTTTTCTTTTTACGATCGGCAGTTTTTTTTTACAACCATTTTTTAGCCCTGACAGT  
GTTTGATCCAAAGAACTACGAGTTGGTGAAATAATAAGTTACAATTCTGATGGCAAGTACACTTTGTCTGG  
GTCCAGGGATCATTTTGTCCGAAAGGAGCTAATGTAACCAAGTCTGTGGAAATGAGCTAATGTAATAAAG  
ACTATGGAAAGGAGTTACTGTGAAACAGACTTTGGAAATGAGCTATTGTATGAGTCTTTGAATATGAGAT  
AATATAACCCATTCTTTGGGGAAGGGAAGCTAATGTAATGCAGACAACCTCAGTGTAAGAAAACTCAAG  
GGAAAGAAAAATGATACCTTTAAACTCACTGTGATATAACTCATTAGCATTAATACACCATGTCCATG  
TTAACAAATGGCACAAATGTATCTGAATTACAAGGACTGCTATCTCTGTAGTCACTACGATCAAACGTGT  
TCAAACCACGTTGGTTCTTCAGGAATCACGTAAACATTCCCCGCATTATAGAAACCGTATATACATAAAA  
CCTTTGTGTTTGTCTGTAGTTAAGCACAAAAGTAAACAAAGAACCATCGGTGCTGTGTTTGGCACCGCGG  
GTATAGAAAGCCTGTTTTTATCGCATAGTATGCAGTTATTGCTGTGCCATTGGCGAGATTACATGTGTG  
GAAATCATATATAGATGTATATATAGGTGAAAGAACAACTTTTATTTGTTTGATCGTGATTAAGCATA  
AGACTATACAAATGAGTTATATGTACTGTGCTTACCACGGGGATCAAACCCGATTTCTAGCGTTATAAGC  
CTTCAGACTTTTCCCTGTGCCACTGGGTGTGTGAATATAGAGTAGGTGGGGATATGAAAGGCTATTGTG  
ACAGGTCAAAATGTATAAAACGATACGCAAATCATATATAAGATGCATTTCTGTTACACAAGTATAATCT  
ATATGATCATACATTATGTTTGGTGTTTAGTTTACATAACCACAGTGAATATATCACCAGTATTCCAAAT  
ATCAGTGAGTTAATTCTTAGCTCTCCACATGCACTGCCAAGTTACGAGTTAACATCTTCGAAGTGTTTAA  
AAACATCTTCAAGGCCCTTACATGAGCTAGTTTCGACGTGAGTGTGTTGCCCTGTTGTGTTTCAGGGCTGAA  
TATAATGTTCTTATGTAAGCTGAAATGTCTAATTAGGTGCCGTACAATGCATTGATTTGTTGACACT  
GACTTCTATGGAGATCTCATTGTTCCCTTTTACACCATGTCTCTGAGGATGTGTACGCATATATATATAT  
ATATATGTGTGTGTGTGTGTGTGCGAACTTATGCATATGCGCGTGCATATAATAACTTCCCTATGCAC  
ACAATGAAAAATAAATGTTTCATTTTTTTTTTACTCTAACGTGTAGTGGAACGATAGTTACCATGACTGTT  
AGAGTATTTATTCAGATCCTAAACTGATTTGTTTTCTTACGTGTAATTCATTGTTTAAGAGCATTTTATT  
CCACCCTGTTAGTCTTTAAATGATTGTACGTTGAAATAACAAAAGCTCCATATACACGTGGACGTGGATA

ATTAGTTTAAAAATAAGTAACAATAGCAGATGCATTAGAAGAGAGAATTGATACCAACAGATAATTTTTTTG  
TTTATTTTAAATTTGTTAAGGGAATTAATATTTTTGTGAATATATATGTTATAACAACGTTTCAATAGGATA  
AAAGCGTCGATTGTATACACGTTTTACCCGAGTTCAAACGTTATGGGATTTCTTTGTTGTCAAGCGCAAA  
ATTACCTAACGTGTGGGCTATCTCTATTGTGTACACCACAGGTATCGAAATCTGGTTTATAGTGCATAA  
GCCCCCTCTGAGCTACTGGTGAGAAGGCTACCTTACACTGAAGTATTGATCTAAATTTTGAAACATGAAAG  
ACGTGTGTGGTGTGTTTAGTTTGTATGACGTCATTAGATATCACGTTTCATTAACATATTAGTGCGTGA  
AGTAAAGCTTTATAATTACATCAGATACGTTTTGTGCGGAAGTATGAACTGATCACATAGTTCTAGCAGG  
GCTCACGTAAGAATGTACTAAGACATACAACTATATGTTGCTTTTTGCTGTGACATACACATCCTTATA  
CCGTTCCAAAAATAAAATAAAAACTTCCATCTATCATTTCTACGCTATTTCTGGATTTACACAACTA  
ATGCTAATCTTGTAATCGAAAATATTTTATTTGTTTTTAATTTTCGCGCAGAGCTACGAAAGAGCTATCTGC  
GTTAGTCGTCCCTGATTAGCAGTGTTAGACTAGAGAGAATGTAGCTAGTCATCACCCTCACCGCCAAC  
TTTTGGACTACTCTTTTACCAACGAATAGTGGGACTGACCGTCACATTATAATGCCCCACGGCTGAAAG  
GTCGAGTATGTTTGGTGTGATGGGGATTGGAACCCGCGACCCCTCAATTTACGAGTCGAACTCCTTAACCA  
CCTGGCCATGCTGGGCCATTAATCGAAATATATGGAAATGCACTTAATTCGCTACAAAAATATAAATTGT  
GAAATGCTTAATATATTTACATGTACCTTTACGCGACTGGTACTATTCTAAGTAGAATATGTGAGCGTG  
TGTATATATATATATATATATAATGCTCTTATCAGAGACAGGTGTAATATTCATTATGCTTGGTTTAT  
CAAGTTATCTCCTTTACCATAGGAGAAATTTTCTACATACCAAGCTATCAATACATTTAAATATTTGTTTT  
TTGAAAATAATGAATGAAAATTAATGAAAATAAATGAGGTATCATATCACTCTAAATAATTTAGCATGT  
TAAACGTTAAATCTAAGCAATTTGACTTGCGAAATGTTAATCCAAGTAATTTAGTATATGAAATGCTATT  
CTACGTAACCTAGCTTGTGAAATGTTATTTTTAAGTAATTTAGCTAATGAGATGCTATTTTAACTGATGT  
AGTATGATAAAATAATATTTCTAATTAATTTATAAATATATAGCATGTGAAATGTTATCCAAGTTATTTGAC  
CTGTGATATATTGTTCTAAGTAATTTAGCTTGTGAAATGTTATTCTATATAATTGAAGTTGTGACGCACT  
TAGTAAGTAATTTAGCCTTTTACATATTATTCTAAATAATTTAGCTTGATTTATCACCGTAAAAGAGTCT  
ACATCTAGCTATAAAAGTGCAAAAAATGGCGCGTGATTTAAGCTACAAGATAAAACAAGACAGGTCTCG  
CAAATTTCTCGTTACAGAAAAACGAGATAAAACGTTAAATGGAGCTGAAAATTTGATAACGAAAGACCATG  
ATCCAGATGGCAGACGAACCATATTTGAAAGGCGTATGTACTTTGATGCAACTTTAAAAAAAACAAACAG  
CAATTTCTTTTAATGTTGTCGTAAGAATGAGTCAAGTGGAACAGATAACTGGTTACTTATTTCTGTTA  
ATGAGGCAGTAAGATGTGTGGTATGAAAAGTATGTTAAAAAGAAAATGTATTTTAAGCAGTGTATTGTGG  
CCTGAAACATAGGTCTGTATGTGGTATCCACTTCACTTACAAAGAGAGCAACGCTCCTTTGTACTTCCCTC  
TTCGAAAGATTTTTTATTGTGGTTTTTGGTAGTTTCATAAGACACATTCTGAATCTTTATTAGTCGATAATAG  
TTATTTTATCAAATAATTTGTGTTGTTTTTAAATCTTTATTTTTAATTTCACTTAGTTGTTAAATTTTCCA  
ATTTCTTGTAATAAAAAATAATAATCAAACACTGTGCTTTATAAGTAATCAAGTTCTGTTTTTGTAAC  
GTGCGTTTAGTAAAGACAATGCATAATTTAATTAAGTTGTTTGTGCTTAAACTTTTCATTATCATCTTT  
ACGCTATATCTGGATTTACACGGCCGATGCTAATCTTGTAATCGAAATATTTTATTTGCTTGTGTTTT  
TAATTTTCGCGCAAAGCTACACGAGGGCTATCCGCGCTAGTCATCCATAATTTAGCAGTGTAAGACTAGAG  
GGAAGGTAACTAGTCATCATTATTCATTACTAACTCTTGGAACACTCTTTTATAAATCAATGAATAGTG  
GGATTGACTCTAACATTATAACGCCCCGAGCTGAGAAGACGACCATGTTTTAGTGTAACGGAGATTCTGA  
ACCTGCAACCTTCAGACTACGAGTCGAGCATCCTAACCACCTGGCCAATTTAATTAATAATTTTGTAA  
ACGTTATATAACCTTCAGGTTACACAGTACTATATATCCATTCTCTGGTGTGGAAGATGACAGAGATAGG  
CAATACTTCTCTCGTTTTATATAAATTGGTGTGTTGTGTATTATTAATACAGAAGTCATAACGAAATACTT  
AAAATCAACAATAATTAAATCAACTAACTATTAGTTTTTCCATCTTTTAAATTTATAGAACACTCAT  
GATGGTGCATCATTTTCTTTTATAAAATCGTTATTTGATCGAAGTCCGCTACCCGAGAAAGTATACATG  
TATAGAATATTCATATTTATTTGAAGTTAATTTAAATGAACATTGGCATTGGCACGGTAATAATCTATCA  
TTAAATTTAAAGTACGGTCGTTACAACTACCTGAGCTGACGTAAAGAAGCTCCTAAAGGTACAATAAAAA  
ATAACAATGAAAAATATTTTATTTGTTTTACTTGTTCTGTTTCTATCAGGAAACAGAAGCGAGTTTCATG  
TTTTTAAAGTTTGTTTTTCAAATCGTATGTATTTGTTTTCTAGACTTATTTACATCATTTCTAATTTGTGTA  
CTCAGAATTTTCGCATAGAATAATTTCTCCGTTCTAGTAGGTTTCTCAGCCTTAGAATTAATTTGGCAGGC  
AAAATTAATGTTCTAAATTTATAACCAAGACAGTAATGACATTTTGAAAGTTGTTGACGGGTTATTTAAT  
TATATAAACCTTTTTTTGAACTTATTTATCGAAGCTAATCTCTTGATAAAGGTATATAGGTATTTGGCC

AAGTGGTCAGGGTGTTCAACTCGCAACTTTTCGGGTACGAATCCCCGTTCCACCAAACACACTCGGAGCAG  
TTATAAAGTAACGGTCAATTACACTATTTCGTTGCTAAACGAGTAGCTCACACGAGGTGGCAGTGAGTGTT  
GCCTTCTCTGTAGCTCATCACTGCTAAATTTGTAATGGCTAACGTAGATTGCTCTCGAGTAGCTTTGCGC  
AAAATGTAAAGCACACCAAAATACACCATACTGATACAAACAGGATATTTACTACAACAGTATCATCAAT  
GCTTACGAACCAGATAAAGAAGTTACATCCAAATAAATGCAAAATTTCCGTTTATTGTAATTACCTAGAT  
ATATACTATGGTGATTTTGGTGTTTAAATTTTTCGCGCAAAGCTACTCGAGAGCAATCTACGCTAGCC  
ATCTTGACACGTTCCGATTATTTGCGAAGACGAAATTATTTTATGCTGTTTTTCGACTTCTCTCTCGCGC  
GCGTGATTTTATGCCATCATGTAATTCCTCATGTAATTGTAAGGCTTAAAAGCATGCTAATGTTGAAAAG  
TTCATCCAGCATTGTTATGACAACTGTTTCTAGGACATCCAGTTAAATAAGCGGTTTTTAATACATTTAG  
GAACATGACTGCAGCAAAAACCTTAGATTTCAAATCTGATTTTCCCTGCACACCTGTACCCAGTACTGGAC  
ATGCCAGAGCTTCAGGGATTTAGTGTCAAAATGATAGTGCTACTCTCTTACCACCACACTTTGCGGTGTC  
TTTGGTCAACCGTCACGCGCTGTCAACCAGAATATGTCAAACCTGGTGACCCCAAGGTTGGAGTCTTCACA  
GCGGCACCACTCACAGAGATATGGAAGCCTCTGGGTGGGCCGAGTCTCTTGAATCTTTAAGACTTAAACC  
ATCGCGTCTTTTAGACCCGAACCCAGCACAGAATAACCTCACGTGACAGTTTTCATTTTTATTTTCTCTGTA  
AATGCTCTTTTTGTTTGAATCAAAGGAAGAAATATCAAAGCAAGTGCAGAATTCCTTACAGTCAACCACG  
GATTAACCAAAACAATGTTGGCAATCACAGGTGTCCAGATGTGAGGGTGAGATGGAGAGAAGAACAGGG  
GGTTAGGAAGGTATAACTGACACGTGAATGTTTCTTTCTATTTGAACGTATCAAAATTTTCTCACAGGT  
GAACTCGATCAAAATTCAGTACTTAACTTGAGAAAGTTTCTGTGCTGATCTCGCAAAAACACGTGTGTAC  
AAGAGTTCATTTATCTGAAAAATATTACTTTCCGTAATTACAAAACATTGAAAAAGTCCATACAATAACG  
TAAAAATGCAGTTTAACTGTAAAGAAAACAACAAGAAAACAACACGGAATTTAACGGGGAATTAACA  
GGTGTTTTCTGAATTTATTATATTTGTGAGTTTTTATCTTTCTGAATTTAAGCGAAAATAAATGCATTTAT  
GAGCAGCTGTCACTGAAAAGATGCGGTTATCCCATTTACATGTTGGTAAAAAGAGTAGTCCAAAAGTAGG  
TGTTGATTGGTTGGTTTCTTCTAATTTATCACAGGGCAGATGGCCTTCGAATAATTTTATGCGAAAT  
CAGCAATTAACCTTATGGAATCTTCGACAATTTAAATTGGCATGGATTGGATTTGATGATTTCAAGTTC  
ATTTACGTTAAGATATCTTGGAGTCAGAGATTTTACTAAACAATATTTTTTTCGCGTATTCGCGACTGTGA  
ATATTATTTTTGTTTCAAGTGAATTATATGCTGTTGTTGTTTGCACCTATAATAATAAAGTTAAATCTAG  
ATATATAATGGTAATCGAAAGCAGATTTCTAGATTGTTCTGCGATAGATATTACGAGACCTTTTTCTAT  
AAAGCGTGTAATTTCCACGCGTTTGTGTTGTAAGGAAACATTTGAGACACCGTGTGAGATATATACTCCA  
AACTGAGGAAAAGTAATAGTCGTTGCTCTTCAAACATTCTAGGCGACATTTAAAGCCATAAGTATAGTA  
GTTACTAGGTCTCGATCTTCAGGCAATCATCCATCTTGTGCTTACTCAGTGTTCCATTTGCTGGGCTTAC  
TATCCTATCCCTTGCCCTTATTGATCACTCTCCACCAATAGAAAGTTAGAAGGAGGAGCACATGATGATG  
TAATCTGGCTGCACCTACTGGATTGATAAAAACAGCATATAGAGAGGAACATGCTTTAAAAAATGATT  
TCATTCATGATGTTAAGAAATATCTGTGAATGTGAGAAAATAAAGCAAAAGCCTTGTTTATAGTTAAAT  
ATATATCATGCAGGCAAAACACTATAAAACATCCAAAGCTTTTCGGAACATAAATTTAACAAATATACGGA  
TTTTTGTAGTGCCATCTGTTGTTGATTTAGAAATCGTTTTAATTTGCAAGGAATTTTACAACCGTTTAT  
TCATTTACATTGACTTTATATTTATGAATGTAAAATAAGAGAAAAAAAACATTTAAATGCAGTATAATT  
TATTGTTAACTTCAAGAATTTCTGACTTTTCTCACATTACTTACTATAATTAATATCATCGCATTTTTTT  
ATTGGCTTACAGATGCGTCGTTTAAATTACCTTTACGTTATTTTACCATAGGAAACATAAATGTCAGCCTG  
CACCAAGACATAGCCATATTCACCTTATAATTACTCTAGGCTAAGCGACTGTAAACAATAAATCGTTAATA  
CGTCAGCTGATATTTTATGATGAGGTTTCAATTTATCCAACCTGATTTCAAGTTTGTCTCCAGCTGGATATTTGGA  
TCATTTTATTTGTCCAACCTGGTTTCAAGTTAGCTCCATCTGGATATTTGGATCATTTTATTTGTCCAACCT  
GGTTTCAAGTTAGCTCCATCTGGATATTTGGATCATTTTATTTGTCCAACCTGGTTTCAAGTTAGCTCCAT  
CTGGATATTTGGATTACCTGTGTTGGTCTAACTGATTTTCAAGTTAGCTCCATCTGGATATTTGGATCATTT  
TTATTTGTCCAACCTGGTTTCAAGTTAGCTCCATCTGGATATTTGGATTACCTGTGTTGGTCTAACTGATT  
TCAGATTAGCTCCATCTGGATATTTTGTAGATTTTCAAGTAAACGTTTATAACTAATACCATTTGTAAGC  
CCTTCAGCTGATATCCCTCAGCGATAATTCTAAGAGCTTATAACTCTAATAATCGAATTTCAATACCTAC  
TATGGAACCTATGTGATAAAACAAATAAAACATTTATGTTATAAATATTTCAACCGACATTTAAAGTCACTGC  
ATATCTTTAATCGCAAGATCTGACGGTCAGTCAGCAAGTGACAAGTGATTGTATTAAATACTATAATATT  
TAAAAATGGATATCAACTGTCAGTGGAAGTAAACACTGAGTAGTGTAATCAGAGATTGGCGCAGTGATTT

ATTCATAAGAGACATTTTCTATTTTAAACATTTAATAGTATATATTATAATTTATAAAAGTCACATTTCTTT  
CATTCGCGCTTTTAGTTAAGAAATACAGATAATATTAGATTTTACACCTTAATTTTGCTTTAAAAAAGCAAT  
TTTAAACGTGTCTTCAAAAACGTATTTTTCATATTAACAACGAGCATAAAACCTTTGTATTATAAAAA  
TCGTGAATATTTTAATTTTATTATTTTGTATGACAATACAATTGATTTACGCTTTGCAACATCGAGT  
TTTGTTCATGAATACTGCAATCAGCAATTGGCGCAGTGATTTTTTCGTGAAAAAACAACCTTTTGTGAC  
AATTCCTTCAAGCAAGGAGCGACTGCGCTGTAGTGAATGAATATATTTTAAATTTTCCATTGCTATTATTAA  
TGCTAGCAAACGTACGGATAATATGGATAATTAAATCGTTCTGAAGATTAAGTGAGGAGAAACGTTATTT  
TAGAGATTACGTTTTGTGTGTTGTTAAGCGCGAAGCTACACAACGTGCTATTTGTGCTGTGCCCATAACT  
GGTGCTGGAAAACCGGTTTTTCAGCGTTATAAGACTTCAGACTAACCTCTAACCCAATTAAAGTGTGTGTG  
TTTGTGGGAGAGGCGTATACATTTTTTTTTTAAATGAATGAGACATTTCAAGTGGAGCCAGTTTAGAAAATA  
TATTGTTGATATAGCTTGTGACTTTTGAACCTCTGAGGTCAAATACGAATAGCTCATTCAAATAAATCGT  
GTTTTTGTGGGATTTGTTTGTCTTAGACTAAAACCTGGCTAAGCTGCGATCCAGCTGGACTCTGGTGTAT  
CTAAGGATCAGATTATACATGTATTGTGTTGCGGATTCGGTGCTAAGCTTAGTGAACCTTACATCCTGGCA  
GGTTTTCAATCTGTATTTCAAAAAACAATACTTTAGTTTTTATATACTTTATTGTAATCTGATTCGG  
CACTTCGTTGTTTTACTTCTTATATGAGAGTAAACGAGAAACAAAAAACCAGAAACAAGAATTTTC  
GCGTTGAAAGTGAAGCAAATTTATTAAGGGTCTTGTTACATAGATTAGGTTTTATTTTCTATTTTTT  
TGTTTTGTTTTAATCTCTCTGTAATAACGAGCAGGCGATTTCGTCATTTAGAGAAACCGTTCGAGCTGG  
GTGTACGCTATAATAAAACCTGATAATGTCAGTCCTTAATGGAATTTATGAAAAACGACATTAGCACTTT  
AACAAGGCCTCGCAGTTGTACATCAACTAGTTAGTAGGAGGGCGTGAGACAGCGCACGTAATGGTCTTCA  
TAAATTTAAACAATGTCGCAAACTGTCAAACTAGCGGACCAGTGTTAGACCTATATCAGACTAGTGTGCTG  
AGGACAAGGCAAGCTCATAGGATATTTAAGAAACTGATGATCATATAAGCTATATCTACTCGTGTACATT  
TCTTGGTATTTCTTGCCAATGATAACGTTAAATACCATAACAGATACGTACGTAGTATGAATGGAAATGC  
AACGGAAAATGACAACAGCAAAAGTAGTAATGACATGGCGTTTTGATAAATGGGCTCTATCTCCCTTAC  
CGTTCGTGAAAACCGTGAATATCAGTATGTAACTGGGAAGATTAGGCAACTTTCCAAGTTGAAGGCCAG  
TCCTTAGCTTTTCTGTGTCATTTAGGTGCTGAAAGCTTTTGAATGCGGTGACATTAATTTGATGAATTT  
TGCAAGCAGAACAGATATATTCAACTTATTGAGCCTAAATTAGAGAGCTGGATTTGAAAGGTATGATAAT  
GAAATGATCAGTTATTGTACTTTAAAGACAATTTTCAAATGGCGGCTGAGCCTAACGACGGTTCTAGCT  
ATGAAACATTTCTCATAGTAACACTTTTAGTTGCTAACACAATGAGATTTTTATACGACGTTGTTATTC  
TTTTTTATTTTCGCTACGTGGCAGCTCACAAACAGCTAACTCATTTCTAAAATAAATAATTAACATGACATA  
CTGGATAAAAAAATTATAACCGTCATTTACGACATCAGTGGAGCATAGCATAGGTAACCTAACCTCTACGGA  
AGGATAGGCATGGCCAGGTGGTTAAGGCACTCGACTCGTAAATTGAGGGTCGAGGGTTCGAATCCCCGT  
ACAACCAAATATGCTTGCCATTTCAAGCCGTGTGGGCGTTATAATGTCACGGTCAATCCCACTATTCGTT  
GGTAAAGAGAAAACCAAAGTTGGCGGTGGGTGGTGATGACTAGCTATCCTCTCTCTAGTCTTACATTG  
CTAAATTAGGTACGGTTGGCGCAGATAGTCCTAGTGCAGCTTTGCGCGAAACCCAAAAACAAACAACTC  
TACGGAAATATATATCATGGTAGGTTTTGTGCTTAGAACCTTTGCTCTTAAAGCAAGTAATCTTATGTC  
AAACAAGATTAAGCATTCAGTTAATAACGAACTTTTATTAATCTCTCTAATTAAACGTTTTAAACGTATT  
CGTGTACAGATACATATAAGAATTCTTGATGCTATGAGTTTTTCGTAAATATTTTAATAATATCTATCAC  
AGGCTAATACCTAAAAATAATATTAATAATCAAAACCCACTTGTAGCTATATTTAATTAATGTTAAGTTC  
CAGTCAGTGGAACCTTGGGAGAGATTAAAAATTGATAGAGATTATTCAGTGATAACAAAAAGTTTAAAAAC  
TCGATAAATCAAGTACATATCTGTATTTAAATAAGAAAACCTTATCACTGGAATAAATATATTATATTAA  
GATGGTTTTGTAGTACGGCAGTAAATAATTTTTCTTGTAAGCCATATCCTATACAGGACTGTCAAAGACG  
ACCTACAAAACCAATCAATATAACGAACTGCTATTTAGAGCTAACGTATCCCTTCTCGACCCACAGTCA  
ATGGCTCCTTCAGATGTCATGGAAGACAGCAGAAAAAATGATGGTTTTAATGGACTTCAGAGACATTGATT  
CTTGGGGTGCCGTTTGTGGCACCTCGCCCCGCCTTAGTTTCGATTCTTCAAGTGACTGAGAGAACATTTT  
TAGATAAAAGCCCTTTCATGGATGACTCCTGAATAAGAGTGGCCAGTGTTTTCTCAGACAGTTTCTACAA  
CTAGTATAAACTACACCTAAATTTACAGGCTGCTACAATCTCTAAGTCCTTGAGTCACTTGATCTAACA  
ACCATTATTAAAGACAAGGTTGAACGTCCGTAATAACTTATCACTGAGGATTTCAAACATTATATATCA  
CACAACCAAGTTGATGATTGATTCTATTATCCACTTTTAAAAATTCCAAGGTAATATTTCTTTGATACTT  
CACGTTTAAACAGCGTATCTAACGGTAAGCAGAATTTACTTAAAATAGTGTTAATGTTAATAAGCCCAATC

TCTTTAAATTAGGTTTGATATTCAAATTTTGCACCTCCCCAGTAGCTCAGCTGGGGAAGTTTGAAAGCT  
TAAAACTCTAAAAAACAGGTTTCGAGACTCGTGGTGGGCACTGCAAAAATAGCCCGCTGTATCGTTTGT  
TGCATAGCAGCAAACAAATATACTTTGTTTAAACATTTTCTTTAATACAAAGCGTGTAAACATTTGAGAGG  
CACTGATGTATAGATCATAAAAAACATATTGCTGAGTCTTTATGTTTGTTCCTTATTTAACTACTCCAAGG  
TCGCTGAGCCAATTTCAACCAAACCTCTGTGGGCTGATAGTTTAAAAAGAGGGTCAATAATCCTCCTAATC  
TCCAATTACTACTGTGATTAAACATCTATTATTTTTCACGTATGTTAACGTTAATTACATATATAGATGG  
CGTCACGTCATTTCAAAAAATATTAAATTATTTATAACAACATAGACAAAGTGGCGTTGTAAAGCAATAA  
AAAATGGCCGCCATTATTGCAGTAATACATAAACTAAGCAGAAATTTCAACTCGAAAGCCACAATAAGAC  
TCACATGAATATTCTGTTTCTGAGTTTTACCAACTTTTTACTTTAAGCTTTGCCCTTTCAACTTTGTCCCTC  
TAAGGCACTTTATGCAGTCAATAATCGTCAATTAATTAATCATGTGAAAAACTTTGGAAGGACGTAAGAGC  
TGATTACTGAAGGCGAGTAACAGAAAGCACCCCTACTGCCACTACATATTTCTGCTATCTCTTCTTACAA  
TGTTACCCCTACCATCGCATAGTAGCGTATACAATGTTTTAAGTTGGTTGGTTGGTTGGTTTATG  
CACTAAGTAGCTAGACTATCTGCCTCATAGTTTTAATTAGATACATAGTGTGTGTGTGTGTGTATAGCA  
AAGCCACATCAGGTTATCTACTGAGCCACCGAGGGGAATCGAGCCCTGATTTTAGCGTTGTAAATCTG  
TAGATTTACCGCTGTACTAGCAGGAAGCTGATAGATAGAGAGCTCTTAAAGTTTAAACAAAACTTTGGT  
AAGGTATTAATGAATGCTGTAATAATATGTTACGTTAAAATAAATCGTGTTTTAAAGTTTATAAGCCGAA  
CAAAGAACGGATATCTCAACTTGAAGAAAATAAAGGAAGACGTTTGGATGGCACTTGAACCAATGTAAAA  
ATAATTCAGTTATCACACGATATTGCACACTAAGTAAAAACAAGCTGCAATTATAACAACACTTATGAAC  
CTATTGAATTAGCTATTTTTCAGTACCAGTAAAAGTTTTAGTAAAATGGTCTGTACATAGCTTGCTTTAAA  
CCAAACGTTGAAAGTATAAAATATATATCGTAACGTATACTTAGCTATAGTCACAAACACTACTTAACACT  
GGAGTGAAATATATTATATACATATTCAGGTTTTAAGTACAATCAGTACTTCACGTTGTACTAGAATCAC  
GTATATTGTATATATTTTCTATGTCTTAGCTATAGCCACGGTCAGTACTTAACACTAGAGTGATAAATAC  
TGTATAGTTTTTTCAGGCTTTAGCCCTAGTGATGGTACTTAACACTAGAGTCACGTGTTATGTACATATAT  
ATACTTCAGGTTTTAGTTGTTGTTGTTGTTGTTGTTGTTTGAATTAAGCACAAAGCTACACAATGGGCTATC  
TGTGCTCTGCCACCACGGGTATCGAAACCCGATTTTAGCGTGTAAGTCCGCAGACATACCGCTGAGCC  
ACTGGGGGGCCAGGTTTTAGTTACAGTCACGATCAGTGTCTGCGGTAACCTCTCGCTACACGAGAAACGT  
ATATTAATTAGTGTAATAAAACAACATATGTGTCAAAAACGTATCTTTTATAACTAGTGACGAAGAGGCC  
TTATTTCTGTTGGGCCCCGCATGATCGGGTGGTTAGGACGTTCTGGCTCACAAGCTAAGGGTCGCAGGTTT  
GAATCCCCATTACACCCAACTTCCTCGCCCTTTTAGTCGTGGGGGCGTTATAATGTTCTGCCCAATCTCAC  
AACTCGTTGATAGAAGAGTAGTCCTAAGAGTTGACGGTGGGGGGTGATGACTAGCTGCCTTCCCTCTGAT  
CTTACACTGTTAAATTAGGGACGGCTAGCGCAGATAGCTCTCGTGTAACCTTTGCGTAAAATTCAAACGA  
ACACGTCTGTTTTTATCAGTATCAACACTATTCACTGACTTGAACCTGACTGGTTAGCCAAGCAGCGTCA  
TCTCGTGCCCTGTAGTCGAAATATTAAATATTTATAATTTTTTACGATCTATTTATTATTTTGCTAACTAG  
AAAAAGTTTTATTTTTTTCGTTGGCGTAATCCTTGAGAGAAAACTTTAGGTATATTCTGAAAAACAACAG  
CACTTTTCATATATTCGTAGAATTGTTTTCATTTTTAAATTTTACGAGAACCTCATGCTAGTTCTCGCGG  
TTCACATCTACATTATTTAGTTTAAAGTACATATAGCGATTCTTTGTTGAAGCGACAGTTAAATCATTA  
TAACAAAGTTTACCCCGACCTGGCATTACAGTGCTAGAGAATGAAAATGAAAACATAAGACATCATTTGT  
TTTTTGATAGAGTAGTTAATTGGCTGAAAAAGTACTAAGAACTGCTATTTTTTAAACATGTTTTCAAGCA  
AAGCATCTCACTCTAATGTGTTTTTTATGTTAACATCAGAGGGCGATAGTGGAACAGAAAGCTCCAGCCG  
AAGTGACCCTGGCGGAAGCGGTGATGATGAAGAAAATGCAGCAAGATTACGTCTGAAGAGAAAACTACAA  
AGAAACCGGACCTCTTTCACCCCAGAACAAATAGAAGCGTTAGAAAAAGGCATGTAACATAAATATGAAGT  
CAATGGAAGCACAGCTCATAAAAAATAGTGGCGTCTTTAAACTCGATTATGTATTGTCTCACAATTGCTG  
AATCTGTAAAGTAAACGTCAAAGAAGGAAAAATTGTATTACGTTAAGTAACTCTAAAATTCGGTAATACT  
GCTTTAATTTAACGATATAAATAGTGTAAAAAATCATTTTTTAAAGATTTTCGTTACAAAGTCTACTGTGTG  
ACGTATCTTACTTCTGAACTTTCAAATAATTATATAATGGAGTTCGCAACTCGTGCACTTCTGCAGTAT  
TATCTTAAACAATGGATCGAACATCTATTTATGTTTTTACTCTTTCAGTAATTCTGAACGAACTCATTAACCC  
AGACGTTTTTCGCCCGTGAACGATTAGCATCAAAGATAGACTTACCAGAGGCTAGAATACAGGTATACAGC  
TTAACCTGTTTTTTTATTGAACATATGAGTAAATACACTTAATGAGTTTGTGGCTAAGAAAATAAGAGAATT  
AAACATGTACTGAAATATTAGAATATTTGGAATAATGACACAACCTTTATGAAGTCTCGTTTATTACAAGCA

CGTTTAATATTATTGGTGACGATCGTTTAGTTATTTGCATTGAAGCTCAAAGCTACACAATGGGCTATAT  
GTACTCTGTCCACAAGAGGTATAAAAAACCGGTTTCTGGCGATTTATAATGTTTACGGAGACTTAAGATA  
TTACAATAAAAAACACATCAGCCACGTCGAAAAGAGAACTTTTGATTAAAATAATATATGTTTTTAATCCC  
TGTAATAACGTTTGAAAAGCAGATGGATCGAATCGATTTTTTTTTTAAAATAAAAAATTTATTATACAAAAT  
AATCATAAAGTAACACCGTGCCTGGTCTCAAAAATAAAACAAAGTACGGTCCGGCATGCCCAGGTGGTTA  
AGGAACTCGAATCGTGATATGAGGGTCGCGGGTTCGAATTCCCGTCGCACCAAACATGCTCTCCATTTCA  
GCTGTGGGGGCGTTATAATTTGACGGTAAATCATAACTTTTTTCGATATTTTAGTGTATTTTTGAAATTAA  
GAGCCATCATATCTTTATGATTATTGTGTATAATAAATCGATGTGACACAAAACATGCTCATAAGCTGGA  
AATAACGTTTCACTACTGAAGATGAAGCGGTAAAAACGTCTCATTGGATTTTTTGTAAATCTTTACATTT  
TAATGTTTTATTACCTATGATAAATAGTTGTTGTTGTTTAAAAAAAACAACTTTGATTTGAGCGTTCAGTA  
TTACAATTTGTGTTTCAAAGGTTTGTTTTTCCAACCGAAGAGCCAAATGGAGACGGGAAGAAAACTAC  
GGAATCAGAGACGAGCCGCGGCAAGCGGCCGCGCTGTCAACAACACACCAGGTGCGCTCCCTCTCAA  
TTCAGGTTTTCCAATTCCTTGTATCCCGGTATAGGACAACCAATGGCTAGCATGGGGGATTCTTACAG  
TAGGCCACTAATAGATGCTAATATGTAACATTTTCTGATTTGTTGCTAATGAGATTAATTACTTGGCGG  
ACAGGTTTAATTTTAAACCATAAAAGAGGCAAATATGCAAGATATTGTAGTGTAGAAATCCTTCTATCAT  
AGTGCTTTTCCTAGTCGAAAAGAATGCTATATAGTTTCTCTTCAGTATAAAGATGGAATAAATTAAGATG  
AAATGTTCTGATTGAGCTATTTTTAGCTGCGGCAAAACGGCTCATAAAACGACTCTGAGTTGTTTTTTTT  
TTAAAGTACAAACTTTTAGCTCATAGCTACGTCTCTTGGTCAATTTGGGATCTAACTACACTTTTGA  
ACTTAGGAGATCAAACCTTTTCAATTGATGCATTTTACCAAAGGTCTCAAAGATTAATTTACTCTAATCT  
TGTCTAAAAGAATTTCTACTTTCAGGTTTGCTGATAGAGGTCCTGATGAGTAGTGTGTTTTGAAGTAATCA  
CAAAGCAACACAATGGGCTATCTGTGCTCTGCCCACCACAGGTATCGAAACACGATTTTTTAGCGTTGTAA  
GTCCGCAGACATACGGCTGAGCCACTGGGGGGCCCTGATGAGTAATAAAATCGAATATGCACGAGCCACA  
CTTGATATTGCTGGCACAATAAAATTTAGCTAATAAAAATGAGAAAAAGTCTCATAGATGAATTTAACC  
TAATTTTGCCTAAAATAACTTTAACTGACGTGGCTATTGAGGATACCCTCTTGTTCGCTATTATGTTTA  
CACTAGTAGTGTATTTTTATTATTTTACTTTTCTGTAGATATAACCAGCTCAGAAATTTCAAACATATGTA  
GAAATCTCATAAGAGGTTTCATACAATATGTTTCTTCCTCAGTTCTATTCCACCGATGTCCACTTACTCT  
ATGCCGAACAATATGGCACCAACCTCCTGTCTTCAGCAGCAAGCGTCATCTTATTCTTGCATGTTACCAC  
CAGGGAGCACTAGAAGTTACGACCATCTTTCACCTAAGTATAGCTATAGCCGACCATCTTGTCTTACCGCACA  
ACCATATGTAATGCAGCCTGTCAATGGTCAGTTTTCTACAGTCAACAATGGTGGTACTGGTTCTACAGGT  
AAATAATTATGTTTGTTCATAATGTTTGTGTTTTCCACTATATTCTTAATGTATTATATTACGCGTATGTAA  
ATATTTAACAACAAATGACTCAGGTATACTTAAGTACATATAATCTAAAACAGAAACGCATTTTGTATG  
GAAACGATTGTAGATTTGACGGCGCAACACGAGTTTCATATACTTAGTAAATTTAAATATTGAACATTAT  
TTGAGAGCTTTGCTTCTTTTAGATAAATGTAGATATTCGATGAACACTGAGTGTAAAGTTTTGCTGCCTT  
ATTAACCTTGTTACTTTTCTAGATATTTCTAATTTTACTAAGTTTTTGTAGAAAATATATTGTGATTGCTC  
GTTAAAACAATCAAATAAAATACTTAGGTTTCTGTTTCAAGAAACATTAGGAACTTTATCTTAAAGGTCAA  
GTGATCTTTGATTCTATCATAATGTTACAAATACACAAATATTTAACACATTAGCCAATGGTTTAAAAAC  
ACTCCTAAGAGAGCTAGACGACCACGAGTGATGAAGATACTTTTAGAAGATTAGGTGATTAGACTGAAG  
AAAAACGTTTAGAGGATTAAGTGACCAAGAGGGTTGAGTTTTAAAAATGTGGAACATAATTTTTCTCAGT  
ACGTTTCATTAGGTCAATATTTCAAATGTTTCTGTTCCACTTTCAATAAAATCCCTAAATTTCTTTGAGAA  
GTTCTCATTATCCAGAATGCTGCATCAGATTAAGTGACCAAAAGTGTTGAGGGGACTTGTAAAAAGCTAG  
ATATAGAGTGACGAGGAGGTTCTTAGAGTGATGAGGGGACGTTTATATTAGGTGGCCTAGAAATGTTGAGA  
AGACTTTTGAAGATTTGGTGACCTAGAGTGATGAGATGATTTTTTAAAGATTAGGTGACCTGGGGTGAT  
GAGATGACTTTTTTAAATATTAGATGACATAAAGGGATGCAAGAACCTCTAGAAGATTAGGTGGTAATTTA  
GAGTAATGAGATTACCTTTAGAAGCTCAGATGACTTAGAAAGGTGAAAGAACTTTTAGAAAGTTAGGTAA  
CTTAGAGTGACTAGAGAACATATAAAGAACTAGGTGACCTAGAGTGATGAGGGGACTTCTAGAAGAATTA  
GATGATTTAAAGTGATAAAGAAATTTCTAGAGATTTAGATGACCTAGAGTAATTAGGAATCTTTTAAAGG  
GAGAAGGTTAGTTGTTCTCAATCTTTCTCCAACCTAGGGGCTGGCTATTTATAAATCCAAAATTTTATGGA  
CTGCTTTGTACAGTATTAAATTTTGAAGAGTACTTTTATATTACATTATAAAACAACCTTACTTAAAGTCAC  
TACATTTCAAACACACATTTTCTTCTTCTTTTTTTTTACTATCTTGTGGACTGATTAATATCTTGCAGTG

AACAAGTACTGTTCCATGGCAAGGTGATTAGGAAACATCGAGTTGGATGAACTAGAGTGATGAGTAAATT  
TCTAAAGAATTAGGTGACCTAGTGTAGTTTGGATATTTCTAGAAAATTAGGTGATCTTGAATTATGAAAC  
GATTTCTAGAGAGTTAGGTGACCAAGAGTGATTAGGATATTCAAAGAAATTTAGGTAGCCTAGACTTACA  
AGGGAATTTCAAAGGAATTGAAGGATATAGTGTGTTCTTCAGACAGAGTATTAAATAATTTACGGGAACA  
ATACAGTCAAAGAAGATATTTATTAGGTTGTATTATAGTTTAATGTACTTCCATAAAAGGAATAATATAA  
GTATGTTTCCAAC TAGTAGGTGGTGAGAATCAGATGTTGTGTTTTTTTTTTATTTCTAATAGCAGTAATAC  
TTAATAAAAGATTAGATGAAACTTAGATCATCTTAATCAGAGAGATAATCCATAAAGGTTCCCGTAAAG  
TGGATTCCGTAAAAATTAAATGCTTTCTTTTACTTCTTGTGAAATGTTACTGCTTTTGTTTTTTCAAATGAA  
TTGTTTATTAAAAATATCTGCAAGTTTACGTTTTTAAAGAAATGAACTGTTTATAATAAACAGTTTATATGT  
TTGTTGAATAACGATTTAGTTACCACTGAGTTTTTGACTTTGTTTTTATTAGCAAATAATCTTTATGCTG  
GTATATTACGTTTTTGGCAGGTAATTATAACATTTATATTCTATTTAGTTATTTCGATTTCAGATAACGTTTA  
TTGTAAGAAATACACTGTTTGAATTAAATTATTTTTTCATCGTTATTGTCAAGGTTTGATATCACCGGGAC  
TGTCTGTCCCAGTTCAAGTGCCAGGACAACCAGCAGATTTGAATATGTCTTCAGCCTACTGGCCGAGAAT  
ACAGTGACCCCTGGGAGCGTCAGAAGCACGTGTGGACAAAACAAAACAAAACAAACAACAACTAGCTTTT  
GACGCTGATAACGGTTTAAAAATATTTTGTATCACCACAGTTTATGTAAATCATAGAACACTCAAAACTTT
