# Supplementary material for: Evolutionary Conservation and Diversification of Five Pax6 Homologs in the Horseshoe Crab Species Cluster
Source: MDPI journal article supplement (doi:10.3390/arthropoda2010007), 2024-03-04
Supplement: s1 [file s1]

>QXHF01022320.1:c2732503-2673144Tachypleus tridentatus isolate BBG1  
scaffold3997, whole genome shotgun sequence  
TGCACGTGGGGACTAGCTAGGCCTAATTTTCGGTCGCTGTGGCTTTTTTCGAGTTTAGAATTTTGAAAG  
AGATGCCCACACAAGGTAAAAAGAACAACAGTTTCATGGATATGTTTTCTTTATAGAGTTAAGCTTAATGT  
GAATTGAATTTTCGTAGACCATGCTTCAAAATGACAATCGTTTAATGGAAGACAGAATTTACCGATATTGA  
CTGGAACGTCTTTTTCACCTATAACCTAAAAAATCAGTTGTTTGACAAATTATTGCTGTGCGTACAGAGA  
TTTATTTCTTAAATTTTGATAAAAACAAACCTGAAAACGTATTTTCGCCTTAAAGGTATTTGTATTATTCA  
GAGTAATTTACAGTGTTCATGCTTAACAGAAAAATTTAAAGAAATAAACAGATACATAGAAAAATAAG  
ATTTATTTGTTTGTTTTAAAGTTTCGCGCAGAGCCACACGAGGGCTATCTGCGCTAGCCGTCCCTAATTTA  
GTAGTGTAAAGACTAGAGGAAAGGCAGTTAGTTATCACCACCTCACTGCAAATTCCTGGGCTACTCTTTTAC  
CAACGAATAGTGGAAATTGACAGTCAATTATAATCACCCACAACCTGAAAAAGTGAACATGTTTGGTGCG  
ACGAGTATTCGAACCCCGACCCCTCAAATTTAAAGTCGAGTGCTTTAACCATCGGCCATGCCGGGCTGAA  
AGGAGATTTACGCTGAGGATTATAATGCAAGGATTTCCATTCATTTCTGAATTTATCTAATTAAATATGT  
GAATCTGGAAACCCACTGCTTTGGTCTCCTCAACATGATTTTCTTGAAAAGCTAGTTTTAAGTTTGTGT  
TTCCTTTGTTGTTGCTGCTCTTCATCCATATTGGTCACAAAAAACAACAACAACACGAAAAACGTA  
ATCTTTCTTTTCGCGAACTTCAATTACATCGGTTTTGTAAACCAATTATTTGTCCTTTATTGAAAAATGTTT  
ACAAAAGTGGAAATGCAAAAACCTCAGAGTTCCTTCTACTTTATAAGCTATGAAGCAGGTACTTGTGCGAA  
AGGAAATTCCTGTAAGTTTACATGGTTAGAAGAACTAAATTTAAGACCATCAGTTTCACTTTAAACCTTG  
TTTAAGTTTGCTTTTCTTCTAACGACTAGTTTCAAACACCTGCGTCATCTACAGTTATACAGATATAGAT  
TTAAAGCTTATATACATATATAAAAGGTTTCAAGAGACCTCGATATTTAGGGACAAGTAACTAATTCGTG  
CTATAAAGTAAACGTATATGTGTGTGTGTCAATGTTATATGTGGATGTGGTCTTTCTCAACATTGTCA  
TTATTAGATTAGTATGGATGGTGTTTAGAACGCTATATCAACTGTACTTCTATACGTTAATTCATCTGAA  
TCTTTTCAGAAATATTTAATCCACTTGGGTTTAAACCCTGTAGAAAAAGAAGTGAATACTGTCCATATT  
TTACCAGGTGAACTCTGAAGGTGTATTAGTCTATTGAACTGATCTATGTCCGCAGGAAACAGTTATAACG  
TTAAAGATCGTTTTCTTCCATCCACTCAACAGCAACTAAGAGAGTTCATTCTCAATTGGATTAAAGGAA  
ATATTAAGCTCTGAAAAATAGTTAGCGGTGTTTTGTCTGAAACATCTCTCCTCTATACATCTTCCTCTAA  
TAGGGTATGTAATTCGGTTCTAGAGAACTTAGCGATAAAGCATATTGCAACCTATCATTACAGTGTGTT  
TAGTGGAAACGTTTACCACACCCCTTCTTACTGCGCGTGCTTCTGGGAGAGCTATGATCACCACATATGTGC  
CCAAATCAGTTTTCTGCAAGTACGATCTCAGTGCGCGGTTCTTCTCGAGGCATATGTCTCGTGCATCTCG  
TGAAGGACTATCGTTAAATGGGTATTACAGCCACTGAAGGTAAGAATTAACCAAATCAGAAGGAAAGATC  
AAGCTTTCCAGTCAATTTCAATTAATGGACAGAAGGATAAGATTTTTTTTTTCAGCCAAGATTGTTTAATA  
GACAGAAGAATAGAACTACCTTTACAGCCAAGTCTGTTTAATGGACAGAATGATAGGATAAACTTTTAA  
CCAAATTCATTCAATAAACAGAAGGATAAGACTGAGTTTTCAGTCGTGTCTGTTTAACGAACAGAAGATA  
GAACTAAGTTTCCAGTCATGTCTATTGAATGAACAAAATATTTGGACTAGTCTCTAGCTATGTTTCGTTTA  
TTTATAAAACGGGATAGAATTACCTTTCCAATTACGTCGGTTTAAATGTACAGAGTGACAGGACTAGTTTT  
CCTAGGCGTTAAGTCCATTTAATGAGAGAGTAGAAAAAGACTAGCTTTCCAGTCAGGTGTGTTTAAATCAA  
ATGTATTCTAAATTAAGAATATATAAAGATTCTGCTTGTATATAACAATACATTTGAATGAACAGTTT  
AAATCGCTTGTTTTACTTACGGTTATTTTTGCTTATTGGTAAAACGCAGTTGTTGACTTTTGAAGTCTGC  
ATGAAAAACTTTAATCACTAGGAGCCGAAAACGAACTCAAGAATCACACAAAAAATTGAAATTGATTAAT  
GTCTCATTTTAATTCAGTATAAAATAATCTAGTTTCCCCAAACAACCAAATCCATTAATATTGTTCT  
ATTAATTTAGTCTATCTATTCAAAACAAATTATTTTCTTAAACATGTCCAAACACTTTAACTAAAGTAAT  
AGTTTTTGCCTTCCTTGTAAGAGTTTCACTCTCTTAGAAAAACATAGATCAAACTTTTGTGTTTGAAC  
ATATCAAGTTCACTGAAGTACAATTATGCTGTGATTAGGGAGATAGACACATATAATTCTATTGTTTTTG  
CTTACGTAGTAAACACATGCACTTAAATCTATGCATTTATGTATTTTATTTTATATAGCGAGAAATACGT  
GCAAATCATATTTGTTTATTTGAATTACAAGACAGCAACATTTTATAACCATTTATATTTTATTTTAC  
TATGGTTTGTAGGCTACGATTTAAATTAACATTAATGTATATTGCACAATTACAATGTAGCAGTTTTT  
CCCCAAGCATGATTGTATATATATATATTTAGAAAAATCAACATTGAAAATGGCATTTATTTAATAATTTT  
AAAAGTGCTGCAGGTTATATGCTATTGCTCGTAAACAGTCAATATTATTACGTGAGTTATATCTAGCTAG  
AAGAACTTTCAGCCGTTTGTTCATATCTTTTTACTTCTTATTGTCGTTTATGTCACCCCGATCAAACCTGA

ACTTTCTTTCTTTAAAGTTGAATAGATTCCAAAGATTGGAACGGGATAGGTATCAACACGGGATAGGTCT  
CAACACGGGATAGGTGACAACACTTCATGTTACTAATGGTGCCATCTTCCAGAACTTAAAAAATAAAT  
TAAATGCTTTTTTAAACCAGATTTTAAACTAGTTTAGTTAAATTTTCAATTTTAACTACTTAAATCA  
TATCTCACTATATATTAAATTCATCACTGTTATTGCAAAAAGAAGTACAGATACGTGAACGAACGGCTGA  
AAGTTCTTTTTGTATGTATTTCCCAAATAACGATATTGACTTTTTATGTGCAATAACTCATAACCCGTGT  
CATTTATAATAACCTTTAACAAATGATTGTTTAAATAAATGTCACTTTATTAATGTTCAAAATTTGATT  
TTGAGGAATGATTTTGCCCTCACCTTCGTAGACGTACGTTCAAAGTTAACCAAATCAGTCTTAAGTTTG  
GATCATCTTAGAAAGTTTGTTGTTGAATTTACACAAAAGCTACGCAAGGGCTATCTGTGCTAGCTGTCCG  
TTATTTACTAATGTAAAGACTAGAGAGAAGGGAGCTAGTTATCACCACCCACCACCAACTCTTGGGCTACT  
CTTTACCAACGAATAGTGAGATTGATCGATACATTATAACGCCCCACGGCTGAAAGGGCGAACACGTTT  
GGTGCGACGGGGATTCTGTCCCGCGACTCTTAGATTACGAGTCAATACTTTAACCACCGCGCTATCTT  
AGAAAGACGCAATGAATAATAATTATCTCTAAGCTGACACTTCGTTTCATGAATGAATATCTCTAACAAA  
CAATGTGTTGCAATAAGGAGGCTCTGTAATCTAACACCTAGTTTCATCAGAAAAGATCTGTAACTCACA  
ATATTTTTCAAGAACAAAGCTTTGTAACCTAATTCGGTATCTAAAGCGAAGTTCGTTTTGTGTGAACACT  
CAGTTTTAAATAAGATAGCTCTCTAAACTGACCTTCGATTTCAAAATGAAGCTCTCTAACTTAACATGTT  
ACAGGATACTTAAGAACAATGTTCTACTACATATCTAAATAACTTTTTCTTTTTTTGGAGAGTAGTATGT  
GCTTGTAACCATTTGTATCCAGCAATGATAATGAGTGTAATTAACATATCAGTGTATAAGATATTGTAA  
GGAATAGTGAATACTTTCCGGAACATAAAGCTTGCAGTAACTGTATTTAAAAATATCTTGATAAACTG  
ATTGACAATGACAGCAACTATATCAAAACATTTTCTGTGACAGTTTGTGAAACATCCTGACTCAATATTAT  
CTTTACAGTCACTCCTAACCCCGTAACAATGTAAATATCAGTTTAAATATCAGCTACTAATTCATTCACTG  
CCAGAGGTATACATATATATATATATGTGTTTCCCCTCTGGATTACTCCAATAAATTTTGTGCTACTATTAC  
GAAATGGTGTTTCATTTCAAACTTTTTTCAGTTTTATCATTATATAACTGAAATATTGAAACACATGGA  
ATTTTTGTTTTTTATTTTGTATATAAAAATGAACCTGGGACTGGAAGAATTCTTTATTTCTAAAAGTGTCA  
GTAAAAAACTTAAAAATGTTACTGATTCACCTAAGTGACACACATATTTTCTTATGGGGTTTTGTCACT  
GTTTTGATTCACTTTCCATTTTCTTCAAGATAAGTATTTTCTTTGCTTATTTATAAATTTGCACAACTTCA  
GTATTTTGTATATTTATGTCTTAATATGTATATCTAGCTCTTGTGGACCTTTGTTGACGTTAGATTAAT  
GTAATAACATCTTCATGAATATTTTGTAGATAATTAAACAGTATTAACCTCTATACTTTAACTTATTTT  
TATTAATCATTAGTTTAGTTATTAATAGTTGAATGACTGAATAAATAGTTTGTTTTCACCACATTCGTAA  
TTTAACACATAATAGTTTTTTTAACTACGTGAGAACTAGGTATGTATTATGAATAATTAAATAAATTAGGA  
AAGAATCAAAAACGAAATAAAGGAAAGACTTATTCAAGTATTTTTTAGCATAATGTAATGGCAAGAGGGTC  
CCTAGATATTATTGAACGTGATTAATATTAGATTATCATAATGATACCTTTTCACGGAAATTAATGAGAC  
GGTTGTGTTTGAGGGCTTAACCTGTGTAATGTAAATGATTACTGGCAGAAGGCTAAGCGTACAGTGTAG  
ATGACCAAGATCGAGCGAAGAGGCAAAACAGATATATATTTTAAATTTACTGGCTGTTTGTAAAGTAAAA  
GAAAAAACATAACTGAGACATTTTGTGCTCTCTATACCTTATAGATTTTGACCCGTGTCCTCTGGTCC  
ACTTCGCCAGTTCGTCTATCGCTGATCCAGGTTAGTTGGATGATGACATCTGTCTTTCTTAAGATTGTATG  
AAATATGCAGTTGAAATAATGTGATTGACAATCCCTCACTTAACAAACGTTGGATCCGTCTTATAAAGTT  
TGTTTACTCTTGATTTTAACTATTTAAATTTGCAACACGTGAGGTTAAGGTTATGAAAATAGCAGTGGCT  
GTCTGAAAGTTTAAATAAACAGGTCTGCCACTTTTCGTAGAACACCAATATGGTGTGAAATGTATGTTTAG  
CTATAGCTTTGTCTTCAAAATATTTTTTACAACGTAAATTATCCTCTAAAGTCATTAGAAGTTGACGATATG  
TTCTAGTAATCATACGATATATTTCTGCCTGTAGATTACAGAATTGCAGATGAGCTGCTTAAGCCTTCTGT  
TATATTTGAACTGAAATAGAATAAGGCTTGACAATCACTTTAGAAACGTTCTGTTATTCTTGATTTTG  
ATTGAAAGGATATACATACTAACATAAGGAACTTTTAAATGTTTTGTAAACATCGTTTATGAAGATGTCTAA  
AAAGAATTAAATAGTGTGACAGAAAAATGGCTCAGTTTTTTTCTGTTGTATCTAGTTTTGGAGTAGAGTG  
ATAAATAAATAATAAAATATTTCAATTGAAATCATTTTTTGTGTACAGTTTGTGTGTTTGTGTTTGAATT  
TCGCACAAAGCTACTCGAGGGCTATCTGTGCTAGTCGTCCCTAATTTAGCAGTGTAAGACTAGATGGAAG  
GCAGCTGGTCAACACCCACCGCCAACCTTTGGGCTACTCTTTTACCAACGAATAGTGGGATTGACCG  
TCACATTATAACGCCCCCAGCTGGGAGAGCGAGCATGTTTGGCGCGACCGGCATGCGAACCCGCGACC  
CTCGGATTACGAGTCGGACGCCTTAACACGCATGGCCATGCCGGGCCTTTTGTGTAAAGGTATTCACTCT  
AAGCAAGATCAGGTTAACTAGTTTATGGCTTTATACGTTATTATAGCATAACGAAAAATCCAGTTTGTAA

CTCTAAAGAGTTTTGATGAAGGTTTCGATAACATTGAACAAAACCCAGCATGACCTGGTAGTTGATGCAC  
TCAACTCGTAATCTAAGGGTCGTGGGTTTCGAATCTTCGTTACACAAACATGATCGCCCTTTCAGCCGTGG  
GGCGTTATAGCATGACGGTCAATCCAACCTATTCGTTGGTAAAAGAATAGCCCAAGATCTGAGGGTGAGTG  
TTGACTAGTTGCCTTTCCTCTAGTCTTATACTACTAAATTAGTGACGTCTAATGCAGATATCTCTCGTAT  
AGCTTTGCGCGAAATTCAAAACAAACCAACCAATTTTTAACCAGTATTTATATTAGAAAAAAGCAA  
AAACAGTCCCATGTTAATTGTTTTACGGTGTTGAGTTACAATTGTACTTGTTTTGATAAATGTCTTTGAG  
CATAATAGTTCGTACTGGGACCAGTATATATATATATATTCTTCAAAAAAGAAACGCAAAAGGATATT  
TTTGTTATTTTAAAGAGAAATATATGTAATAACGTTACAAGCTCAGAGTATGTGATGTTACACGTGTTAA  
GGCACTGATTGTCAGACCAAAATGACAATAACAGTTGTGAACTTTGAAAACGGAGGAAAACATCGGATTT  
TTCGCCAAAACGCATTCGTGTCCAATAAATTTGTTTGAGAGATCTGCATGTTCTGCAGGTGCAACATGTG  
CAAAATCCTTATAAAAGTGACGGGTTCTCGGTTTCCATAGCTTAGTGTTAAGCCACCGACACGCAATACA  
GTTACGCCAAGACTGACTGAAGCACAACGCAACAACGCCAATGGTCGCTTGAAGCAGGCGAATCTCGAT  
CAGATGTTGCCAGAGCTGTGAATGTCCACCCAAGCACCATCACAAGGCTATGGAATTGTCACCAACAACA  
TGGATCAACTCGTGACCATCCACGATCTGGCAGATCTCGTGTGACCACGCCCCGACAAGATCGTACATC  
CGGTTACGTCACCTTCGGGATAGGACCATCACTGCGACGTCTTCTGCCTCAACCATAACAGGGTTGCGTA  
GGATTTCCGATCAGGCCGGACGCAACCGTCTACGAGATGCAGGAATCCGACCTCGACGTCAGTCAGAGG  
TGTATCCTCACCCAGCAACATCGTCAAGCACGGCTGCAGTGGACTCGGACACATCGGGTATGGTTTCAT  
CGACGATGGAGGCATGTTTGGTTCAGCGATGAATCACGTTTTATGCTTCGTAGGCAGGATGGAAGGACCC  
GTGTTTACCGTCGCCGAGGTGAACGTTTTGTCAGCAAATGTGTGCAGGATGTTGACAGATTTGGTGGTGG  
CAGCGTCATGATGTGGGCTGCCATCGCCTACAATGCCAGAACAGACCTTTTGCACATTCGAGGGAATCTT  
ACGGCTCAACGATACGTCTACGAGATTCTTAGGCCCCATGTGCAACCCATCATGGTGAACGTCAACGACG  
TTTTTCAACATGACAACGCCCGTCTCACAACAGCCCGACTCACCAGTGTCTTCTTGAGACACCACAACAT  
CAACGTTCTTCCCTGGCCCTCCAGATCACCAGATTTAAACCCCATCGAACATCTTTGGGACGAGTTGGAC  
CGACGTCTGCGACGGCGACAACCTCAACCGCAGACTCTACCTCAGCTTGACGAGCTTTGACGAGCTGAGT  
GGACAGCCATTCCACAGGATGTGATTGTCATCTCATCGCTTCATGGGCAGGAGATGCCAAGCAGTTAT  
TGATGCTCACGGGGGCGATACTCGTTATTGACGTTGAGTGACGTTAACTTCACCTAGTGAGCGTGGACT  
TCGCCTTTGACAGACTTTGGATGTTGAGCAGTGAATGTGCAAAGTTTACACATGTCATACAGAACTACCC  
GGAATAAACTTGTTAAACAATATGTCTCAAATTTTCCCTTTTGCCTTTCTTTTTTTGAAGAGTATATATAT  
CAAACCATTTACAATCTATATAAATTTTATCATTAATCAGGGCACACATTTAAAGTTTCAGTTTAAAGTTT  
GATGAGCATACCGTGGATGATGAATATAATACAGTTTACTTCGGACTCGACTATATTTTTTCCCGAAAGCT  
TTGTTTTATTTTTTGGAGAAAAGAAAAAAGCATGACATAATTGTGTGTTTTGAATTTGCGACAAAGCTA  
CTCGAGGGCTATCTGTGCTAGCCGCCCCCTAATTTAGCACTGTAAGACTAGAGGGAAGGCAGTACTCATC  
ACCACCACCGCCAACTGTTGGGCTACTCTTTTACCAACGAATAGTGGGATTGACCGTCACATTATAACG  
CCCCACGGCTGAAAGGGCGAGCTTGTTTGGTGCGACCGGGAGTTGAACCCGCGCCCCCTCTCAATACGAG  
TCGAATGCCTTAACACACTTGCTATGCCGAGCCTTCGCATGATATAATATGAAAAAAGAACTCTTTGA  
ACGATTTGAAATCAGCATGTTTTCTTTGACGAAAGTAATTGACTTCTGAAAACCAGTCTTCTAAAATAG  
TTGTCAAGAGGTTTCCAGTTTAAATGCTCATCAATCGAACTTTAAGAAAGTGTGGTTTTGGTCATGATG  
ACGTAATAGTTTTTTGCCCCTGTGCTTTAGCCTAAAATGACTACAGTTGATAACTTACCAACAATAAAC  
TAATATGTTCTTGTAACAGCTTCGTACCAAAAGTCACTGAAAGGCTAGATTGATTACGCTGGAAAACTAA  
ACCTTGTGATGACTTTAAAACTTTTCTTCATCAGTACTTTTGTTCATTTAACGATGTTTAGAAATGAAA  
AATATATTATACTTAAACATGAAATGTGTTTGGTTTACCGCAAAACCAACATTTCTTATTTCGATTATA  
ACGTCGCAACTCCATAAACTTTCCGCTTACCTTCTGAGGAACAGAGAGTGTGCTATAAGATTAGATATAA  
CTGGATAAAACCGTCAAACTAATGCCAATTTGTTTTATTTTTTTAATACTAACTCTGGATCATCTGGATT  
AGGCTAGCGTGTTCAAGTGCTATCGTGCTGGACCACAGACTCGTGAATTCGTGATTCACGTCTCTCCC  
ACTAAAAGTATAACTATACATATATAAAACGACGATTACCGCAGTTATTCCTTAATGAGCTTTTCGCGAA  
TATCCGAAAATAAAAACAAATCACCTGATTTATAGATTTAACGAGACAGAATATATAATCTCTTTTAAAGAA  
AGCCTCATAAGCTATAACAATTCCGATAAAGTAGGTGCGACAGGTAAATCCTGTAGGTAAAAAAGTTAC  
TTTTCCCTCTATGAAGGTATTTCTCCTGTACCCATTGCCAACATTCATGTTACAAATCGAATAGGAGAT  
GCAACCTTCTCGCATGAAACAAGTAATTTGCTGAGTCTCGCCTCCTAGATTTACAGGACAAATATGTAAA

TAAAGAAGCCTGGTTGATTATTTACATTTAAATTAAATATGACAAGTGAAGCGCGAAGAAACCATGGAAA  
AGTGTATCGTATAGTAGGTAAGGATAGGGTATCCACTACATGTTTCGTGCTAAAAGCTTTTTTTTTTTTT  
AATACATTATAAGGTTTCGGAGATTTTCAAAGATCAGGAAGCCAAGGATTTTCACTTAGTTGTGTGCTGC  
AGTTGTAGAGTTTATAGCATTTATAAAACATTCTTCAATATCCGAAAGTTTTAACTTGCATATTCGTAA  
TGGTTCATTGGATTTGTTTCTGGCGTGTAACATGCTTACGATCCTTTAAATAGAATCAACAGATAAGCC  
TACTTGTACAGTTACAAACATGATCACATACACGAGTAATTAGCTCGTGAGTGTGGCTTTATCCTGCAAC  
AAGGAAACAGCCCAATTTACTCTATAACTTTGTAAGTACACACTGGCGGTGCTTCTGATGGTAATAATGA  
GTTTGTGTTGTTTTGTTTTGTAATTTGCGACAAAGCTACTCGAGGGCTATCTGCGCTAGCCGTCCTAATT  
TAGCAGTGCAAGACTAGAGGGAAAGCAGCTAGTCATCACCACCCACCGCCAACCTTTGGGCTACTCTTTT  
ATCAACGAATAGTGGGATTGACCGTAATATTATAACGCCTACACGGCTGAAAGGGCGAACATGTTTGACA  
TGCCGGGGATGCGAACCCGCGACCTCAGATTACGAGTCACACGCCTTAACACGCTTGGCCATGCCGGGC  
CAGGTAATAATGAGAGACTATAGCATTAGAAATCCCAATTCGTATCTCAGAATGGCTGGTATTGGTATTA  
ACACTTTTACTAACAAAGCAGAGAACAATGTAAAGTGTTAATACCCATATCAGCCGTTCTGAGATACAT  
TTGTATTTCAAGTGGGTTTCTCGTCATCAAGAAATTACAGTTCGATTCCTGCAGTGGGCCCATCGCAGAT  
AGTTCATCTTTGGGTTTTGTTTTATTTTCAAAAAATATAGAATTTGCATCATAAATTTAACTTAATA  
GGTTTGCAGGTAATTAAACAATATGTAGGTGCGCTGTATTTTAAACCCTAAACTACTGATAGCGATCCTT  
TTCATCTTAATAAAATGGCGCTTAAACTATTTATGCACCAATTTCTTGTGGTACATGTCCTTTGTTTTT  
TACATGGTCCCTAGTAATAAGTATATATCACCAAAAGTTTAAATAAATACCATAAATATTACAATTAATC  
TTACTGAATACTGCTGGGTTCTCTATTATAAAGGATGAGTGATTTTATCCAATGCTTATGTTTCTAGCTCG  
TGACACTAAGCCCCGAACAGGTAAAAACATAAAATTACTCAACATGATGTATTATGCAGTGATCAACTG  
TATTATTAGAATTATTTTCCACACATACAATAGGTTGGAATGTCTAGTGTGGAATTATTTTAAAGTTAAG  
CCTCTTGAAATTTATTTTCTAATATTTTGCAGAGTAAATGAGTCATGTGCTAAATGTGTTTTGGCAAACA  
TTGTTATTAAAGAGTTCATATATAAGATGATTATGAGTTAAATATTGATGACAACAAGACATATAAAATG  
AGGAATATAATTTTCTGTTCTCAGTATTGTAATCATGTATATATCAGACTACGGGACAATGATAACCA  
ACTGGAAGTGAATATGTCTAAAAATAACAACTGGAATGTTTTACAACATCCAACCTGGGAAATTGCCATC  
TGTAATTATTTTCAAAGAACTCCATCTTTAACTAGACATACATGAGGAAACCGTTACACGTTTCTTATA  
TTCCCTCTATTCTAAAAAGAACCATTTATGGGAGAAATACTGAACTGACAGTAAGAAAGGTAAAGCTGT  
ATGAAAAGAGAAATATAACCATTTAATATCTGATGAACTGTGGTGGCACTTCGGTTGGTCATAAACCGAA  
GAGCGAAACAATCGAAGATCTTTGGAATCGAAATAACTGTAGCAATTTTTCCACAACCAATGGCACGTGA  
CAAATTTAATCAGATTTTCTGATGCCGTCTATTTTATTATGCTGAAAAGGAACAAAAAGATGAAACAAAGA  
ACAAATTTTGTACTAAAAAATATCGTTTCCAGTAGATGGGTTTCCAGACTCCAGTGTTGTTATTTCTGAT  
TAAAAAAGTGAACCGTTTCAAACGAGACCTAAACTCGAGCACTTCTGAATAATTCATATTCAGGA  
GAATAAAGAGAAAAATAGTGAATTATTTGAAAGTACTCCAGTTTTGGGTTTGAAAGCTATTGTAACCTT  
TGTGTGACTCCGTGTGTTAACTTCTCAATTAGAACCAAAAAACGTGCTCATTAGGAGAACTATTAACAT  
TCCGTGACAAATGTTTGTTTAAATAATAAATGTATTCCAAAAAACATGGTGATGAATATAACATCAAAC  
TTGGGCTTACTGGGTTAGTGACACATCCAAGTTTATAATATGTATACAGAAAGAATAACTTCCAAGAAAA  
CAAACCTTAGGATAAAAGAGGTGGTGCAATTTCAACTGAACAATTTTGTATACATATGTGCGTGAGGATTT  
ATGCCAAAATGAGCAAGACTCTATACAGACAACAAGTGCTTATTTTTAAACGAGTTAACTTATACACTAA  
AAACGGTGTATATTTTAAAGAATAGCTAATCTGCATAGCACGCATACATACAAGTACGTTTGTTTTTATC  
TGAGGAAGCCTTTCCACACGTGCACGCCATATTTTTTAAACGAGCAAGCTTGTTTATATACACACAAATAT  
GCTGTATTTTAAATTGAGAAAACCTGTATGTATGTATATGAATATATATTTATATATATATATATATG  
TAGTTGTGGTGTAGTTTTTAATTGATCGAGTCTGTACACAAATACGTCCTGCATTTGTTAACAGAATAA  
TCTTGTAGACGCATACGTGCTTCATGACTCTGTTTAGGAAAAGTCTTTTACTAAAGAGAGAGACCGA  
TTTCAGACATAAGTACGTCTGATAAAAGTAATATAGAAATGACCACGTGGTTCATATGTTATTGTAAAAT  
TATGTAAAGAAGTGGACAATCATTAATAACGAAATGTCAAGAAGAGTGGATATTCGAGAAATCCAGCTA  
CTAAATCCATCCTATGTATCCGTTCTGTTGGAACTCTTATAGCTGTTGGTATAGGAAAAGGACAGCCAGCG  
ACCTCACTAGGTTTGTATGGCACAGCCACGTCCACAATAGACCTAAGTGCGTTGTGCTATTAGAAAAGCAAT  
GCCAGCTTTGATAAAATAATAGCCTGCTTGAGCATAGAAAATAATTAGACACACACTTGCATACATGCAT  
GTTACAGAGGTAAAAAGCACGTGGTTTAGAGTAGCTATGGGAATATTTAAGTTGAGAGTCGATTAATCAT

CCTTTAATTTTCATGCAGTAAGTATACATACAAATATATATATATATACTCGGAGTGGGATGAAATATTGC  
CAGAAGACTAATTAATATTTGACATGAGTTTTTGTGCGTATAAAGACTTGAAGACTGGTGTATATTTGT  
ATATACATATATTAACATGTGTACTTATCTGTCTAAATATACATACACATATGCATATTGATATCTCTAT  
GTAATATAGTACTTTTGTGTCAAAGAAAAACCAACACAAGTACACACTCTTCAGAGAAATTACACACCA  
TCTTTTAATAAGTGCTTTTATCTCGGTATCCCGAAAGACTTCTACCAGGTTGATGTCTGTGCACCGATCA  
TTGATTGTTACTAAGTATATATACTTAATATAGGGAACATAGTGCCCTAAGCTAAAGTGATTTTGAATCA  
AGTGAAGAGAAGCTTTGCGTATGTGTTTTATGTTTCTTGTTAGAAACACAAGTAGCAACTTGTCTCCAG  
CTCGATTGATTTATTTCTTTACATTAAGCCAACGTCTAAGGTAGACGTTTCAAGTGTCAAGTACAAGCAT  
CAGCACTTATAGGAACACTTAGACACTTAGCTATATGTAGCTTCAATATACTATTTATTTCAAAATATTA  
AAAAATGCATATAAGATTAGATACACAGTTGTTTGTGCGAATGAGGTTATTGCGACTTTTACGAATATAT  
GTGTTATTTATAACTAGATTCTAATAGCAAAAAATAAGACGAAGAAATCTCCTCACATAAAAAATTGCTTAA  
TTCTTGGTCAAATTCGACTGTCCGTCACCTCAGTTTACAAAAGACACGCCCATTTCATTAATTTTCATCCAA  
GAAACCTTTCTCTCGCGAGGCCAATGAGAGCGTGGTTTGTGGAACAAGTGCTGTGTTGTGAAAAAGACT  
ATACAAGCACAGTGCACCTGATTGAGAACGAGCAACTAACTACAATAACAGCTGTTACTTTTACATAAAA  
ATTTCTCTTTTCAAGACGTTCAAACTATGTAGACATAATCTTACTAGCTTAGGAAGGGGTATTTATGAT  
CAGTGTTCCATGCAGGTACATTCTTTCAAATAACACTGTGTAACATAATTTTTACTTTTTTTGTTCTTG  
GGCAGAAAGTGTTATTTCCCAATTACTTATGTGAAAAGTAAATAGAAAAGACCTATTTTTCTCTTCAAAC  
TTTGCAATTTGTGACCTGGGTAATGAAATTTTCAAATTCACCTTTTTTCCAGAATATTTCCAGGTAGATTCA  
GTGCTGAGTAGCTGATACAGAATTTTACGAACCTTACAAGAATTTTCAAAAATGTTGTAGAACTTACGAG  
AATTTTCAAGAACCTTTTAGAACTTTCTAGAACTTTCCATAGTAATATATATATACAGGGGCTCACCCT  
CACCCTTTCAGGTTAGTTCTAGCTGCCTAAGTGAAGACATAGACCTATCTGATTTTATCAGAGATGGCAT  
CAAGAAGCTGCAAGCATTTCTACAGACGCATTCTGCTATGTATGTACCAATTTATCAAGACAAGAGCGAA  
AAAATATTTTGTGACAGCATCTGCTAAAATATGTGAAGCGTACAAGGTATATTTCGGCATGCCTGTCTGGG  
GATCAAGACAAACCTGGGCACCTCATTTTACCTGCGAACACCGCAAAAACTCTAGAAGGTAAAGACGGA  
CAAATTTTGTCTGTTTGAATAGCAAGATTTTATATTATACAAATTTTAGACTTTTTTAAAATTTAAATATT  
TTTTAATTTATTTATTTTAAATTTCCAATAGTATAGAAAAATATCACATGTAAAATATTTTGCATGAAC  
GTCTAACACATAAGTTGTAGATGAAATAAATTTATTCTTCAACAATAATTTTATTTTGTCTTTTTTGCAGGA  
TGGTACAGAGGGGAAAAAGAGAGCCATGAAGTTTGTCTATTCCAAGAATTTAGCGTGAACCCACTAACCCT  
CAAGCAGTTGCTACTTCTGCATAGAGGACCTTCCAAACGTGCGGTTGGCAAGAATGCTTTTGTCTATCAT  
GTATCCGGACCTTCCATCATCCATCGCTTCAGTGCTAAACTTCCCTGTGATCCCTGCATTCACTCCGCCA  
GAGAGAAAGTAGCCATCCTCAGAAGAGAGCAGCATATCAGAAGAGGAGGTAGACGTTAAAGATCCAGATT  
ATAATTACAGTGGTGACGCTGGTGAGATAAACCATACTACCCCAATCAAAGAGATCTCAAAGTATGATCA  
GAGATCTTGGTCTAACAATGTCTAATGCCGAGCTTTTGACTTCTAGGGTCAAAGAGCGGGATTTGCTAGA  
TTAAAGCGTGCAAGTCGCAAGTCAGAGGAAGCGTAACCGACATTTTCAAGCTTCTTCACTCGTCAAGAT  
GGGCTCTGCTTCTGCCAATGTATCCGGTCTGTAGATGGCGACTGAAATTTGCTGTAAACCCGAACGAGT  
GGCGCTCTTTCATTGATAGTTTATCCAGAAGCCTCAAAGCTGTGCTGCTCCATAACGGGAATAAGTATCC  
GTCTCTTTCCCGGCTTATTTTCGGTGACCTCAAAGAGGAATACAACAGCGTCAAGACCTTGATAGAAGC  
CTTGAAGTATGATGAGTATGGCTGGGAGGTAATCGGAGATTTCAAAATGGTGGCGTTCCCTGATGGGTCTT  
CAAGGAGGCTTTACTACGTTTTCCCTGTTATCTTTGCCTATGGGACAGCAGGGACACCGCAGCACACTACA  
ACAGGAGGCACTGGCCACAACGAACCGCGTTCTCTGTGGGAGGCACAATGTCAAGTATGAACCACGAGT  
GGACCTCCTAAAGGTGTTGTTCCCACTATTACACGTAAAAGGTGGTCTTATGAAACAATTTGTTACAGCT  
CTTGATAAGGAGTCTGAAGCCATCAAGTGCCTTCGAGACTTATCCCTACGCTGTCTTGGGCAAAAGTCA  
AAGCTAGCGTCTTCGTTGGAACACAAATAAAGAAGATCCTGGAGTGCAAAGAATTTCTCCAAGAAGCTCAG  
TAGGAAGGGAAAAAATCCTGGGGCAGCTTTGTTGCAGTGGTCTGGGCTTCTTGGGCAATCACAAGGCC  
GAAAATTTATGTGGAACCTGTTGAGGTTCTGGTAAAGAACTACGGCAAAATGGGCTGCAGGATGTCTCAGA  
GGAGCAAGGCAAGCGCTTTACCAATATATACTAGACTTTAAACGCCGCTACCAAGAAGCGTATAACAAA  
AATATAATGGGAGACTATATTTGGGGCCTGATACGTGAAAGTGGTTTACATTACAGTCGCAATCTCGAA  
AACTACTCACTTCTAAACATTTTTTGTATAATTTTAGTATAAATATATGTAAATCTTGATTTCATATGTTG  
TTTTATTTCGGACCGCATGTAAATGAAAATGTGCAAATTTGCCCGTTTTTACAAAGAAAAATAGGTTAATTT

CTAAATTTTCATTATCCAGGTTACAAAAGCAAAGTTTGAAGGGAATAATGGCCATTTTCTGTACTTTTACA  
ACATAAGCAATTAAGAAGTAACACATACTATGCAGGAACAAAATCTGTATTACATAGTGTACGTACTGCA  
CATAGTCACCTCAATTGTAAAACCTGTAATCGCGAAGCATTTCCTAGAAAAGTTGTCCTCACTGAAAGAAA  
AAAGTTCAGTTGTAGGGTAGTGGATTGATTTTGAAATACATTATTTAATAGACTGATGCCACTGATGCTT  
CTTCTATTTCAAGGTATCATAGTCTACAAGATCAGTCACTTTACTGACGTTACTAAGTATTTCATTGGGAC  
AGATAATAAAGTTTATTTAAATACTCAACAGAAAGTGTTTAATAACTATGTCTAAAGGGCATGACACTTT  
TCCACTCACTGAAATCATTTGAGTAATAAAATATTTAAATCCTTTTATCCATAACTGATGTGAGCAAAAGC  
ACTCAGAAATTAGTGACGTAAGTCAGTTGAAACTAAGTTATGGCAACCTTTTCAAACAGAGAAAAACACGT  
AGATAGATAGATACATATAGAGAGAGCTAGATACATGCATGATGCTGTGAATTTATTACTTGTAAATAATC  
TGTTAATTTAAATCCACAAGTTTCTCAGGACATAAATCGTGTTTACCTAGTTATTTTTACGCAATGGTAT  
CTCATTCATGATGCTCCCTAGGTAGTACAGCGGTAATGTCTACGGATTTACAACGCTAAAATTAGGGGTT  
CGATTCCCCTCCGTAGGCTCAGCATATAGCCCCATGTAGCTTTGCCATATGAAAAACACCCACATTCATG  
GTAGGATCTGCATTAAAAAATGAAAATGAGTCTTGTAATCTTGTTGTTACACTTTAAAAAGAAAGCATGT  
TAGGTTATAGATACGAATAGTCTGTAATAATCTATAGTCACAAACCTATCATTTAAACAGTTTAAAAATA  
GATTCATAAATCCCAAAGAGAACAAATGCCTTTAATGTTAAAGTTAAATAGGAAAGGACTCAGATATT  
CTAATAATAAAAAATGATTGTTTGGCTTATCTTCTTCACAGCGGAAAAGTCCCTAGCTTAGTATGCGAAAAG  
GGTTTGTTCCTTAGAAGTATTTGAGCTAACATTAAACAATGTGTAAAAGAGACGTATGCGGTTTATTCTTT  
AAAAGTATTTGAGCTAATATTCACAATATGTGAAAGAGGCGTGTACGGTTTGTTTTTTTTAGAATTGTTT  
GAGGTAACATTCATGCAGTAAATGAATGACCGATGTAGTTGAAAAGGGAAATATGTTGTCAATTTAGAAG  
AGATAACCCGTTGTTCTTAAACAGAGATAAGCTGTTTGTGTTTGAATAATAACCTGTTTGCTTTAACAGAA  
ATAGCCTTCTCCTTGTTTTTATGACGATAACCCTTTTGCTTTAATAGATAATCTAAGAGAGTGGCGAACA  
AATACCACCAGACACCATTGTACACGAGTTTTTAAATGGATGGCGTTTACTAGCCATCTTCAATTTAACCA  
ACCAGTTCAAAAATAGAAACAGTTATTTTTTAAAGCCTTGTGTGAACTTTTGCGGTAAATAAAGAAAGAGTT  
AAACTGATGGTTTTAATTGAGATAGTCCATTAATTTTTGATAATTATAGTCTGACTGTTTGTAGTAAAGAT  
TTTGTGTTGGTAATCGTCTGCCTAGGTAGTCGGACCCGGCATGGCCAAGCGTGTTAAGGAGTTCGACTCGT  
AATCCGAAGGTTGCGGGTTCGAATCCCGGTGCGACCAAACATCCTCGTCCTTTCAGCCGTGGGGGTGTTA  
TAATGTGACGGTCAATCCCACTATTTCGATGGTAAAAGAGTAGCCCAAGAGGTGGCGGTGGGTGGTGATGA  
CTAGCTGCCTTTCTTTTAGTCTTACACTGCTAAATTAGGGACGGCTAGCACAGATAGCCCTCGAATTGCT  
TTGCGCGAAATTAAAAAAAACAAAACAAAAACAAGCAGCCTAGGTAATTATAAGCCCTTTAGATATGATA  
TAGATAAAAAAATATATTTATCAATCCAATACATAAAACAGTGGAAGTTACACAGACAAGTGGTAGA  
GATGGAAATCAAAATTTTTTGTGTTATAGTGTCTTTGGTTTTTATCGTGTGTTTCTATTTTTGAGCAATTC  
GTGTAAATATTAGAGCACAAAACAATTTTATGTTGCCCTGTATATTTGCCGTCTTACAAATGAACTAAAA  
CAAGAAAATGTCTTATTTAAAAATTGACCACAACCTTTGGATGTAATACCACACCCTTTTTATTTAACA  
CCACAACTTTTGGATGTAATACCACACCGTTTTATTTTCAACACCACGATCTTTGCGTGTAAGAGATGAA  
TTCCGGAAAAACACTTGATTTCTCGTAATATATAAAACAAATTAATATTTTTAACAGAATGATCTTTCTTG  
TTTAGTGAATTTTATTTGTTTCAAAAGATATAAGAAAGAGAAAACATATATGTTGCTCAATATATTTGTG  
AGTTTAGTTCGTAGATTGTTTATTATCTTTTGATGCTTGGCTTTCGTGTAGTAATGACATAATGTTCTT  
ACTTACTTTTTCTGTTTCTATTGTAAAAATTGAGGTTTCATGTATGTTTTCTCTGCAGGACACAGTGGTATA  
AACCAACTGGGAGGTATTTACGTCAACGGTGCAGCACTGCCGGACTCCACCAGACAGAAGATCGTAGAAC  
TTGCTCACAGCGGCGGAGGCCCTGCGACATCTCCCGTATTCTTCAGGTTTCTAATGGTTGTGTTTCCAA  
GATTCAGGCCGATATTACGAAACCGGATCCATCCGGCCCCGAGCAATCGGGGGAAGCAAACCCCGTGTG  
GCCACACCGCCCGTGGTGGCCAAAATTGCTCATTACAAACGGGAATGTCCCTCCATCTTTGCCTGGGAGA  
TTCGAGATAGACTGTTGTCTGATGGAGTGTGCAGTAACGATAATGTTTCCTAGTGTAAAGTAATGTTAATCA  
CCACTCATAACGTCTATTTCTATACAACTTCTCTCGACACGTGTCGCTCACACTGAATCCCTTTCTG  
ACAACTTACGACAGTCTACTGCAGCAACTCGGCAAATGTGCACTGATAATCTGGTTTTTAATAAACAGAC  
GCAAATGTAACCAACATATGATGTTATTGTACACAAAAAGATAGAAGAATAAATAAACACGCATAAAAAAT  
ACACTGGCAGACAGATATAAACAGACGGTAAAGATGGTTGATAAATTAATTTCTTTTTCACACTCTTCAGA  
CATTTCAAAATCATCAGAAAAGTCACACAATCAAGGTAGGAATCTGATAATAACTTTTTATTTTGATCTATA  
TATTATTTTGTACGCTTATTAATATCAGAACATTCTATTCTCCCCCATGTTTTCTAATTAGGTAAGACCT

ATTATATTATTACCTTTCTTCTTATGTACATATGTATTAACCTATCTTTGACCTTTAATATATTTTGTA  
GTATTATCAACCTTATGGTGAAGTTCTGTTGTTTTGTGTGAGAGTTTGAAATTGGTATAATATCGTCTA  
CGTTTTTCATTAACTCTTTATCGTGTTGTTAGTTCAAAAGTTTGATATTTTTATCTATTATTTTAAATC  
ATTTAAATATTTGCTTTTTGCTTTGAAGATATATTTTATAACCCTAGTAGTTTTCCACATAAAATGTTA  
GATATCAGGTAAAAGTTAATCTGCTTTATTCAATCAATTGAACATGCCATTAAGCAACAGCGAAACACC  
AACCGTTTTATTATTATCACAATATCTGTTACCTTTGGACATGGCAAAATGATATGTTATCACAATGTTTG  
TTCTTTTGAACACAATACAGAATATGATAATATCACAATATTCGCTTTCTTGAACACGGCAATATTTTC  
CCCTGGAAAACAACAATATATATAAATATATAAACAACAATATAATACTGTTTTCACAATATCTCT  
TTCTTTGAACACAAAATATCTTTCAACTATTACAGGAATAATTTTTCTTTCTAAAACCTTCGCTTTTCTT  
CTTTGATCATGCATTATTTAGAATTTAGTTTTAACCTATGTTCTTGAAGTACAAGTATAGGTAAAAATCCA  
AAGGTAAATATATATATATATATGTTGTTTTTGAACATATTGTTATTGTTTGTGAGCTTCGTTAATATGA  
TTTTTTTTCTCAGTTGAGTGATGGTGGCGGTTTTGTTTCTAGCAAAAAGCTACGTAATGGGCTATCCACGCT  
CTGCCCACCACAAGAAATCGAATCAGGATTTTAACGTTATAAACCAGTAAAGTTGGTGCTTATCCATTGA  
GAAGCATTTACTGATGTTTATTGTCTGTATCATTCCATTATTTTGTACATTACCTTTTACTAGTATTTG  
GTATTTTCAATTTGTTTCAGCACATTATACAATACTTGGGCCGTGCAGAAGTTCAGGAATAGCCGTCCCTA  
ATTTTGAACCTGTTGATTAGAGGAAGATCAGATAGTGAACAGAACCCATCGCTTATACAGCTACTCTCAA  
TTTGAACCAACAGTGAATGAAAGTTTACTTTCAAACGAGATCACATATCTTGGGCGTTCCGATCTGCA  
TCACGGCCCTAAATTTTTACTACACAACAAAAGACATTGTAAAAAGTAATCAGTTTAAATTCACGTGAAGG  
TTAAACAAAAGTAACACTTTAGAAGTAAGTACACATTATTTACTAATGCATAATGTATTGAAATCCAAAT  
TTATTCCTCGTACGCCATCTATGAAACGCTGACGATTGTAATAAATAATACCATGTAGTTTCGTTATCTG  
TTACCATTATTTTAAACATTTCAGATATGTAAACCAGCCGCTTTAGATTGCTGAGAGAACATGAATTTCTG  
TGGCTTACAATTGCCGTTAACTGTTGTGGGATCGATGTATTGATGAAAGGATGCACCTTCACCATCTTCA  
CACACTGAAGTAGTGAGGATGTATATACAGATCATGCTGGCTTCCTATTTACGGTCTTATTAGTATCACG  
TGATTTTTTCATCACACAATAAGCTAGTTTGTGGCGGTAAATGAAGAGGACACTCAGATTCTAGAGGCAAA  
GTAGCAATAAGGTAATTTTAAACCACCACTTAACATTGTCTATTGTTATTGTTATCGTAAAACGGAAAGGT  
AGCGAACTATAGAAACACCGCCTTATAGGCTGAAAATGTGAATTGTTACTTTTATACGATATTATACGCA  
TACGAGTAAATCGCAATACCTATTAACATACTATTTGAATTGTTTTGTTTTCCCAATATTTTATAATTAA  
TATTAAATGTTATTACATTAGTAATCGTTAAGAAGATACATAGAGAAGTTATGTACTTAATTCACGAAA  
ATTAGTTTATAGTTGATAGTTAGTTTTAATGTTGTAGGAAACCTTATTGTTTGCTGTTAAGCACAAAAGCT  
ACACGATGGGCTATCTGTAGTTTTTCTACCGTTATTTCAAACCCAATTTTCTGAGTTATAAGATCTGAG  
AATTACGCCTAAGCCATTGGTCGGCTATAGGAAAAATCTAGTGTATATATTTAATTGGTTAGTTAGAATA  
TTTTTTTAAAAATATTATTTATCATTTTTTACCAAACCACAATTAATTCAACAAAAGAACTAACAGAATTA  
TTTCTCAGAAAACTGGTGTTCTCTGCATCGTAACAATAGTTTGTGAGAGGCTCAAATCTAGGAATTTCTCT  
AATGTAACCTTTTATTGCTGAAACACAATGTCTAGTAAAGCCTTTCTTAATTTCACTATAATTTTTTTATA  
TACGTGTTTTCTTCAGAATTTGTTTTACCAATAGGTGCATAAAACGTTTATATTTTGTATGACATCAAAG  
CTTTCGTAATAAAAAATGATATTTTTAAGTTTGTCTAAGCTTGTAGCGAAGTTATTACAGCAAGAAAGTACT  
GTTAGAAAAGTTAGAAAAACAGACTGACAAGCATAGAGAACGTATAACTTAAAAAATAACCATAAAACATAC  
AATTTGATAACTTATAAGATATTTACTAATATACGCAATGATAACTAATTAGATAACTATAAACATTCA  
ACATTGATAATCTATTAGATTGCCATAAACACAGGGCATTGATAACCTATTGTATAACTTCAAACATACA  
GCACTGATATTATATTAAATAACTATATTTAAACGGCAATGGCACTGGCATCTTCNACTGACAAGCATAGA  
GAACGTATAACTTAAAAGATAACCATAAACATACAACCTTTGATAACTTATAAGATATTTACTAATATACG  
CAATGATAACTAATTAGATAACTATAAACATTCAACATTGATAATCTATTAGATTGCCATAAACACAGGG  
CATTGATAACCTATTAGATAACTGTAAACATAGGGCACTGGCATCTTCTTTCTTTTCATGGCCAGGTGGTT  
AAGGCACCTTGACTCATAATATGAGAGTCGCGGGTTTGAATTCACGTACACCAAATATGCTCGCCCTTTC  
AGCCGTTGGGACGTTATAATGGGAAGGTCAATCCCACTATTTCGTTGGCGGTGGATAGTGATGACTAGTTG  
TCTTCCCTCTAATCTTATACTGTAAATTAAGGACGGCTAGCGCAGATAGCCCTGGTGTAGCTTTGCATG  
AAATTCAAAAACAACAAAGTAGCTTTAAACATACGGTACTAGTAACCCATTACATCACTATAAGCATATG  
ATATTGAAATATATTTTATAACTATAAAACAAACGGTATTGATAACTTATTGCACAGTTACAAAATAGAGC  
ATTTGTAACCTAATGCATCACTCATACGGCATGATAACCTGTCTCATAACTATAAACAAACAATAATGAT

AATCTGTGATATAGCTATAAACATACAGCATTGATAGCTATTATACAGTTACAAGATGTATATCCACGAG  
GTCTCTAAGTGTATGGTTAAAGAATAAATAAAACCAAAATTAAGAGTAACAAACATTTATGTTTCTTGC  
ATTTGAAGTTCGTATGTTATGCTCTGTCTATACCTATAGAGTTTATGATTCTTCTCGTGATTCATGGCAT  
ACGCACATTTTATTAACGTCACGACAGTACAAAATGTAAGATTAAGCATCCCTTATGTGACGTACTTTTG  
TACTTATGGGACTGACAGATAGCACACTACTGTATTCTGGTGCGAGTGATTAAACAGGTAATCCCTCTA  
AGCAACCTTTGGCCTCCTTTCGTAAAAATAAAAAATTGAATTAATTTATAACAACAATGCTGAAACAATCA  
GTGATTTTGTCTCCACAACTCTTTTAAGGTAGACAAGACCAGCTCTGAAAATCGTTCTTCATGTTATTTAC  
TATGTAACATAAACTGTGATACTACAGCATCAATCAAAAAAGACGTTTTTCTTAATAGAAACCGAGTTAG  
TAACTAATAGTTAATACTAATACTATTAAGTGTAACTTATAATTACTAACGTAATAAACCAACGAACTGTC  
AGATTTAATTTGAATAAAAACTCTTGGGACTCAGTAATATTTTTACTGCATACAATTTATTTAATAATTT  
TCTGCAAATTAATAATTTAATTCTTAAATATAGTTTATAATGTTTTATTGGTTGAAACCTTAATTTGAA  
TTAATTATTTTGCACAACTTCCATCCAGTTAGTAAAAATGATCATTTGTATTCCGAGCAGTTAGTTACT  
AGTGAACTAAATTACAGCCTCGCAGAAAGATTCAACATTGCTAGTTTGTCTCAAGCCTAGGGATGAAC  
GATTGACATCAATTTCTACGGTGCATGAACACGTGAGACTCTCTATAATGCTCATGTGGACGGAAGAAG  
GCTCTGGTCTGTCTCACGTCAATTGGTGTCCCTAACTTATACTTGAAAATGATACAAATGGCCTAATAAAT  
CCTACCAATTCCATATGTTTGGGCAATGTGCTGAAGATAGCATGTAATGATTATTGGTACATTTCGCAATG  
AATAATTCAAGACATATATATAGACAAAGATATACATGAATAGAAGAGACAATGGAACCTTAGGATTATTC  
GTTATCGTCATTTAGAATAAGTGAGAGGAGATTATATAATAGTTTGTCTTTAACAGAATGTTAACGTTA  
GAAAGAAGTTTACCTCTTTAAAAATGTTTTATTTTAAACTTGTAAGTTTGTTCATAGCGAATATCTGTG  
TTTGAGTAATTTTACTTCTTTTGACAAAATGATGGAACATGTTTCTAAACTAAAAATGGATTTTTCGCGC  
TAACAGAGACTGAAAAGACCAGACATCTCTCTGGTTGAGTATAAAACTACAAATCAATAACTATTAGCGG  
CATCTTATAAAGTCTTTTATTGTTCCATAAAAGAACTGTCTCGTTTCTTCGTGGTTAAATAATCGGCAT  
TCTGTATTTTATTCAATTGGAACCGTTACCCCTCTGCCCTTACCTTCTTTGATCATACTATTTTTCTT  
ATATAAAGGAAGTGAACGCCACTTATCAAACAATAACATAACTTTAACAACCACGTTAGACTTAATCCTT  
TTTGAATAACCTTTTTATATGACACACAGTGAAACCTTTAGAGTACAGAAAGTGTGGCTAGCTTCAAAC  
ATGGCCTCCCGTAGCGCTGAGAGGCATGGATTTGCTCAATCAAGGACTTCTGATTCTCCAACCTAAATTC  
CAGAATGAGCATGAAGAAAAATGTGAGAAGTGGTAAATGTTTGTGGTTAGTTCTTCTTCGTATATTTACT  
GCATGTTGTATGTGTGTTTGATCTGGCTTCTTCAGTTTAGAAAAACAACAATAACGAATACCCATTTCAG  
CAAAGAAATTCCTCCACAGTTGTTTTGTCAATGTTACTAAAGCGGATATGTTTACTTCAAAATATGGAGA  
TTTATATGCGCCATTCAATGATACGGAAGACTGGTTTTAAACCGGTATGTGTAGATATAGGTTCTAAAAATA  
ATTTAATCATTTTATAAAAACTTAAATCAACCTGTAGTGAAAACAGGCGAAATAGGCAATTGAAAGCAA  
CGGTCAACTGAAAGGTAGGAGGTTAAAAAGGAAGCTTGGTAGCTCCACCAAAGGGGAGATGAACAATAAA  
CTTTAGAAATATCACCAGCTGTCTGACGACACCGACGTTACTTTGTAGCAAGGTGTTCAAACGAAAGCT  
CTGCCGCTACAGGTCTGTGGTTTGTTCGTTTTGAATTTGATGCGAAGCTGCTCAAGGGCTATCTGCGCT  
AACCATTCCTAATTTAGCAATGTAGAACTAGAAGAAAGGCAGCTAGACATCATCACTCACCGCTAACTCT  
TGGGCTACTCTTTTACCAACGAATAGTGGGATTGATCGTCAATTATAACCCCCCTACGGCTGAAAGACA  
TGTTTGGTGCGACGAAAAATTCGAACCCGCGACTCTCAGATTACGAGTTGAGCGCCTTAACCCATCTGGCC  
ATCCCGGTTAGAGGTCTGTGTTTCGACCGCTTCGCCAAGTTATTTCTCTTGAACGCAACATCAGTAAATAT  
CTTGACGTCTTTTTCACGTCTTTTTGAAAGAAGACAGAAACAAAAATGTAACCTCGTATGCTAGAGAGGC  
AGTTTGTCTAATGAACACAACCTGTTCTGAAATTTATCTGATCCACTATACACTGGCGCAGAATAAACTA  
ATCGTTTTTTAATGCAGCCGTGTTCTATATTGTAACCTCAATTGTAATTCATCTAACTCTCTCTGTGTTTA  
AGTTGGTACTATTACATTTATCCCAAGAGTATCTTATCCACTTGTAGGTATTAGAACTTGATACATCTAT  
CCGATACTTTCTTATGTATTTGTAAGTGTTGGAACCTATTACATACATACACGAGGATGCCTTATACACCT  
CCATATGTTTGAAGTATTACTTCTATCCTTTAAAGTATCTTACTCAACTGTAGGTATTAAAACTCCCCGA  
CAAATTGTTTTCTGCACTTATATATATATTGGAACATAACATCTATTCAATAAATTTGCTTACCTACCT  
GTAGGTGTTTAGATATATTACATCAATTCAAAAAAGTGTTTTAATCAAATGTAGGTGTTGGAACTGATAAA  
TAGCCTTACTCAAATATAGATGTTTCGAACTGTTACGTCTATTTTATAGTGTTTTAACTTACTATAAAAAA  
AAAAATCAAAACAATTTAACTTACTTATAGGTGTTGGAAATATTTTTTCTATCCAATAAGGTGTCATACT  
AGAATTTTGAACTATTATATCTATATCATAAAGTGTTTTATTACATATAGTTATTGAAATTACTACGT



TTATCTGATAACATATTACAATAAAATATAGTTGTTTGAAGTATGATATCTATATGATTGTGTCTTACAA  
CTTTTAGCTGTTAGATGTATTACATCTGTCTGATAAAATTTCTGATCTAACAGTATATCTTGGAACATTT  
TAATCTATTTGATAAAGCTTCTTACAACCTTGTAGATGTTGGAAGTATCATGTCTATATTTAAAGGTACCT  
TCTTATAGATTTAGAAATATTACATTAATTCTATGGAATCTTTTATCAGATATATTTATTGAAGTAATTA  
CATCCAGTTGATGGTGTCTTATCCATTTATAGGTTTTGAACCGCAACAATTGTCAGGTAATATTTTGGTC  
GCTTGTAGATTATCACATTCATCCAATGGAGTCTTACTTGTATAAATTTGTTGAAATTATCGCATCCAAA  
AGAGATAGTGAATTACTTACTAGTAGATGTTGAAACAATTGCATTTATCATGTAATATGTCTCACTTGAG  
TGTAGGTTTTGTAGCTATTACGTCTACCCAATAAAGTGTTTTACTTAATGTAGGTATTCGAACTATAACA  
GCTATCTGATAGTGTCTCACTCGTTTGCATGTGTTGTAACATTTAAATCGGTCCAGTGAAGCATTTTAGA  
TATTAGTGCGGGTTGGAAGAATTATATCTAATCATGAAAGTTCCCACTTTTAGGTGCTGGAAAAATTTAA  
TTTATGTGATAAATGTCTTAACCACTTGTAGATATTAGAATTATTACATTTATTTGACAAAGTGCTCTTTC  
TAGAAATTGATATTGGAACCTCGTGCATATATCCAATAAAATGCCTTACCCACTTGTACGTGTTGTAACAA  
TCACATCTACCTGATAGTGCCTTTAACTCTTATACGTGTTCAAACATAAAGTCTTTCTGAAACGTACGT  
GTTTGAACATATTAGAATATATCCATAATGTCTTACGTACATACATGTTAGAAGTATTACACGCATCCGA  
TAGTTTCACACGATATTGTAGGTACTGGAAGTATTACATCGTTTTCTGATAAAGTGTCGAATAAAATATG  
TGTTTAACTCTTATATCTATGTCATGATGTCTTACTTACGTGTAAGTGCTAAAAATATTACATTTATCT  
GATAAAGTGCCACATACAAATGAAACCGTTTGAATATATGGATGTCTTACACATTTTLAGGTGTTGAAA  
CTATTACATATTTCTGATAATGTGACATATTGAAATGTAAATGTGGGAACACTACATCTTTCCAACAAA  
AGTACCCCCAGTTGGTATTGGGACCATTCAAGTTATTCAATAAAGAACACTACACTGAAACGCAAGGGTTGT  
ATTCATTATCTGTATTGAATAACGTCTTACCCACCTACATATGTCAGAACTGTTACATCTATCCAATAAG  
AATTTTCATGCTCAACGTAAGCGTTAGGACTATCATATCAATCTAAAAATGTGTTTTAGCCACTTGAAGGA  
ACCGAGTTTGTAAATTTATTTCGATAAATTGCTTTACACACTTGAAGGAGTTGAAAGTACTCGATTTATT  
CAATATAATGTTTTACTTACTTGTAGGTGTTGGAACATTTACGTCTATCAGATAGTGCCTTATCACTTGT  
ATGTATTGGAACATTTACATCTACCCGATAAAGTGCTTTAATCAATCGTAGGTATTGTATTATTGTATT  
ATATCTATCCGATCGCTCGTAAGTTTTTGAACATTTACTTATTTCGATTAAGCTTTTTTACTTTTTATTTAA  
ATGTAGCTGTTGCAACTATCCTATAAAATCTCTTACTTTTAGGTGTTGGAACATTTGTATCTATGATATA  
GTGTTTTACACCTTTGAAGGTGTTTGAACCTATCTAATAAAGTGCTATACTAAAATGTAAGAGCTGGAAC  
TATTATGTATATCTGATAGTGTCTTACAGATGTGTAGGTTTTAAAACGTCTCTATCTATTTATTTAAAGCG  
TGTAACCTCACGTATAGGTGGTAGAACGATTACATCTATACAATAAAGTATTTTACATAAATGGACCTATT  
GGAACATTTACATTTATAAATATATTTTCGTATACTCTCATGTACTCATTATTGTAAAAATTTAAAAATCTGT  
TTTGAAAATCATTTTATTTGAAAATAATAACATCAACTTTTAAACAAAAGATAAGGTTCTTCTGTCTAATA  
CTCTTGAGAGCTAAAGTACGGTGTATAATTGTACTTTTTGTTTCATGGTGCATAATACCATTGTTACGATT  
TACAGTGACAAACACAATTAGATATGCAATTATTTTACACCAAGTACTTAATTCGTATGCTGATAATT  
TGAGGGTACTTGCTTATATAAAAAATCGTGAAAACATATTATTTTGACAGATTGTTTACTGAGTAGAAATA  
AAACCATGAGAGCTAACGTGACTTAAACAGAGTATTTTATTTAGAAATAATAGCTTTACCGAAGTGTTA  
TCAATTACTTTTACCGTGATGAAGTATTTTGTGTTACATTATAGCTAATAATTAAACGAACCTTAGCTTGA  
AAAACATTTATTTCTACTTAACTATATCCTCTCTGTTTATTTAGTCGTCGATTCGGATTTGTTTTCTATT  
TAATGTCTTTTTTTATTTGTTTTCTTTTAAAGAAGTTTACTACATTATGGTTTTTGTGTTTAGTTGGCGTGT  
GATGGCCCGGCTTGGCCAAGCATGTTAAGGCGTGCTACTCGTAATCTGAGGGTCGCGGGTTCGCATCCCT  
GTCGCGCCAAACATGCTCGCCCTTTTCAGCCGTGAGGGCGTTATAATGTTACGGTCAATTCCTACTATTCTGT  
TGGTAAAAGAGTAGCTCAAGAATTGGCTGTTGGTGGTGATGACTAGCTGCCTTCCCTCTAGTTTTTACACT  
GCTAAAATAGGGACGGCTAGTCCTCGAGTAGTTTTGTGCGAAATTAAAAACAAACAAACAAATATTTGG  
CGTGAAATAATGTGTCGATCATTAAGTACTTTAGGGAGCCATCTAGCGACGATTCACAACGTAGCAACTC  
AAATATTCTGTGCTTCTATTAAAGAAATAAACTTTTTATCCGTGTTATCATCCGTTCCCTTCAGAAATAT  
TCCGAGTGGAACCAGCTTCTGGCAGCGCCAAGACTGCTGGATAAAGCGTTTTAGACAAATTCAGTAAATA  
ATTTTCATCTAAATCTATAGAACTTAGTAAATAATCTTACCGTTTTTACAGGTGGTTATTTGATCGTGTA  
ATCTGTTATATCATTAAGTGCCAATTTTATACTGTTGAACTGAAAACATCAACTTATACAGAGTAATAAT  
TTTACATTGTATTTACCGGGAAAACGTGACACAGCTGTGAATGGTTTTATAACGTGAATTTATCTGCCATATA  
CTTATATTTTCGTTTGTGTCAGGCTGTCTTTCAATTTCTACTTTATGTTGTAGAGATTATGGTTAAGTTTAAAT

TTCTGTTTTTATTATATAACATAATATGTATAATATTGTAAATGATAGATATAACATGAAAAATAACAAA  
GTAGGATAAGTCTAACATGAAATGAGTACAGTGATGGATATGAGTAAGAAGACACAATACAGTTGAAGGT  
ATATATACACATAATGTGAACTAATAACATGAAAGGTATGCCTAACACTTAAATAAAACAAAAAGAAT  
TTCCTTTGGCATGAAACAGTACAATAAAGAATATGTTTAAATGTAAATGAATATAGTCAAAAAATATATATT  
GTGTTAAAGGAATACATTAAAAATATGTATATATGAAACGAATGAAGTGGAGACACGTTTAAACATGAAATT  
AACACAACGTAAACATAAAATTTGTACGGTGAAAGATATATAATATTTAAATATGGCAGTTAATCGTATGT  
ATAATATATAAAAGAAAAATGAAGCATAGTAAATATATGTATACTATAAACGCTATGAGAAAGAATATCA  
CAGTGTGAAACTACTATGGTCAAGAATATGTTTAAATATTTAATATTTTTATCATAAAAGGTACGTTTATG  
TGTTTGTTCAGCATAAAGCTGTAGAATAGGCTACCTTTGCTCTGTCAACAAGGGAGCGTCGAACCACAG  
ATTTTAGTGTGTGAAGTTCTTACCTGAGAACTAAAAGACATATATAATGTTAGTACGACAAAAATGCGTG  
TAAAAATATGATATTGTTATCTTATTATCTTATAAACGAACTAATATACTCGTAACTGTGTTTATTTTTTA  
GTTATTTTTTTGATATATGTAGGAAAATTACTTTGATCAGCATTTAATGTTAGTTAATTAATAAAATACGT  
TTTGAAATTCTTCTTTTCTACTACAGGTTTCGTCAATTAATCGAGTTTTACGAAATCTTGCGGCTAAAA  
AGGAACAACAAGCACAGATACTGTTTACGATAAAATTGCGCCTACTTAATGGACAAGGTTGGCCTCGTCC  
AAACCCATGGTACCCTGGTAGTGCTACGTTTGGTGCGGATAACACCCACTTGTATTCCCTCCTCCAATCACA  
GTATCAGGACTCCCCAGTGATAGCGGCCAAGTCCAGAAAAAAGGTAAAAAGTTTTATAATTTTCTTATATA  
ATTATAATTTTTTATGTTTATCTTAAAAGAAACACAACAGCAACAAAAACTCTAATATATTATTTCACACA  
CGAATAAGTTCGAAGCAAATTACATATCGGTGGTTTTGTTTCACATGTTATGCACGTTATTTGAAATACG  
ATGAAACGTACTGCAAGCTAATATAATAAATGTTTAGCCCTACTTGGAACCACAGGCTCAACTGTAC  
GTGACGTATTTAGTAAGTTTCTTTATCTGCGTTCCTAAAGCTTCGTTTCATCTTTCTTTGTGAAGATAGCA  
TACGAAATTATGTTTCGAGAAATCTAATGTTTGTCTTTTTCAAATTTCAAAAATATCTTTGAAAAATCTAA  
TGCCTGATCAGGAGCAGTTATTTTAATTGTTTATTCTCGCTCATATTGTGACTTCTATTAACCACTTAT  
CTTTTCACAGTATGTGTTAGAGTTAGAAAGAATAATCGAGTAAGATACAGGAGACCTTGATTTACGAATTA  
CTAGTTGAATGTGTTTCTCAAAGCTAGGTTATCAGAGGTGTTGAAATGAGAGCTTCTATGAGAAAAGGA  
ACATGAATTTCAATGTACTGCGTGACTGAGCAAATTCGGATGAGCTAACCCGTTATATTTATATACAGAA  
TAATTAGTAGTAGTATCTCAAGAAATGTATGTATACTTTGTCTTTGCAACTGTACCTTTACCTCACTCCG  
TCACTTACAAAATCTACCAGTAGACAAAGCTGAGTTCCTTTGTAACACTTGCTGTATGTAGTATCTTGTA  
CAGTGTCCGCTCCTGAACTATAACGTGTAACCCATTTAGAAAAGGTCACGTGTAATTTATCCTGTTTAGA  
AATTCCTGCTGTCTACTGTGTTTCTCTGTGTTTACGTGTCTTTTCATCTTATTCATACGCATTTAATGTGT  
TGTCTAGGAATACAATGAACGTGCGTGTCTTGACTTAATACTATTGTTTACATAGTTTCAAAATTAGATC  
ATGTCATTACTAGTTCATTGTATTATTTTTTATTCCACTTGAAGAGTCTTTGCTGATTATACACCACGATAA  
CAAAAGCTTTGAAAAGTGCGCATGGATGAAAACAGTATCAGACGCTATGTAATAAAGCTAACGGATAAAA  
TGAGGAATAAAGTGGAATAAACTCACTGAATTTTACGAAATTATAAGGTGGTTTAAATTGGATTAAATCCTA  
ATAAACAACTGATTTCTTAATCTCTTTTGCATACTGAAAATACCTCTATGTTGCAGTTTGTGTACGGGT  
GTCTATGGCTAAGATAATTGTTTTGAAATTAAGCACAAAGCGACCTAATGGACTATCTGTGCTCTGTTCA  
CCATGGGTATTGAAACCCGGTTTCTAGCTTTGTAAGTCCAATATGCCGCTGTGCCACTGATGGGCAGGCT  
AAGATAATACAGAAAAATTTGGGTACGGTTGTGATGGTTAAGATAATCTAGAAAATCACTTGGCCAACG  
CAATTATGCTTAGTCAAGAAAAAGAAGACATTATATCAAATTTATAAAGAAATAAAAGTGTCAAAAAATGTT  
TAAAAAACTATAAATTATCAATGAGCTAAATGTGACATCTTCAGAGAAACATCTTCTTCGCAATTATACA  
AATCTACAATAAAATATTTTAAAACTCCAACAATACGTTACTCAGACAAATGCGCAGTAATAGTTAAAAA  
CAAAAGACTAAAACTACTAGGAGACTAAAGTCGTTACAACCAGAAAAAAATCTTCACTAATACTTTAAAA  
CAGAAACACTGGTAGATTAAATTTTCTCTGTACATCCGCCAAATATCTGTGAATTACTAAAACGTTAAACT  
AACAGATTAACTGGACAAATCTGAAAAATAAGTAATAAGAGATAAAGATAAAAAATAAATACTGGTGTA  
CAAAGCTCCAAAAATATGTAAGAACATTTTAACTTGAAATACATTATTGGAAGATTAAAGCTAAACTATT  
CATAGACAACGGTTGTAAGACCATTTTAAAAATATATGACACAAAACTAAAGTATTGATGAAGCTTGTC  
CTCCAGTTTAGCGACGGTTTATCTGGTAAATAAATGCCAGATGGGTCTTTTCTTGACGTCTCTCACTGGG  
ACAGCGGAAAGTCTTCAGATTTACAATGCTAAAAATAAGGACTTCGATTCCCCTCACTGTACGCAGCAGAT  
ATCCTGATGTGGCTTTGCTATAAGAAAAACACACACTTTGCTTGACTAAGTCTTCAGCTGGCGTGCGTT  
TTTCTCACACCACTTGAGGTGCATGTCTTGAGTGTCTTTATTGCATATTTGGGCTTCTTTGGTTTCGTTT

GCCCTTCTTCAACTGTCCGTTGAAGATCTGCCTCGGGATTCTGGTCTTCTTCACCCGGATGGCATGACTA  
GTCCACTGTAAGTGGGCTATCAGCAGCAATGATTCAATACTAGTTGTATTGTACTTGACTTATCAAGGAC  
TTATTGATTGGTGATTCTATATTACCAATGAACGTCCATGATCGATTGTAGCTTTATCACGTGCCTATCG  
TTGATAATTATGTTTCACAACCATAGAGCAGTGAAGTGTGGACTACTGCTTTGTATTATTTTAGTTTCGT  
AAACAGTTTGGTGTTTTTTCTCTAAGGCTGTGATGCACAGTCTTCTTAAGGCTTGGTTGGCTTCTGAA  
TTCTTGACACGATCTATTTATCCAATGTTACATCTGCGAAAATAATATTCCTTAGGTGTATGATGTTCTC  
CAGGTTTTACAGCTGAGTTTCTTTAATTATGATGGCAAATATGGCGGAATCGCGTTTGTGGCTGGTTAA  
GGAAGAGATTCTGTCTTTTCCAGGCTGGTAGTCGTGTCAAATAAATTATAAGCCCATGATAACTTGTCAA  
CCATTGGCTGCAGACGATTTACCTTGTGTATCATAAGGGAACGATCATCCACAAATAGTGTTTCAAGGAT  
GAGTCTTTCCAGAGTTTGTAGTCCGTCCAGAGAAGCGTCAAAGACAAAAAGACTCGTTAAAACAATATTT  
TATGTAGACATCAAGGTCCAAGTTCTTAACAGTATGAAGTAGAACTTAAGCGAATAAGAGATTGAACAGA  
GTAGTTACAATCACACATCTCTTCTTCACTCCAATTGATGATAAACACTTCTTAATATTCTCCATTGA  
AAAGGACTTCTCTAGTTATGTTATCATGGACAATTGGTTGAGGATGGTGACCTTTCTGTGGTACCTGATT  
TTTCTGAGGCCATAGGATTTCTCTGTTGACTGTGTTATAAGCCTTTCAAGAGTCGATAAAGACGGCGTAG  
AGATCCATATTCTTTCTAACCATTCTCTTGACCTATCTTACTCTGAAGATCATATCTACAGTGCTAC  
GACCTAAAAGAAAATCCACATTGAGCTTCTGGTAGATTTTCTCTGAGATACTTGAGACTTGAAGTGAAGCC  
TGTTCAAGATGATGCAAGAGAAGATTTTCTCTGTAATGGAGGGTGGCGAGATTTCTCTGCAATTGTTGCA  
GTTGACCTTTGAATTTTTATTTTTAAACGGTGCAATAATGGTGGCATGTTGTGAGTCAGCTACCGATTTT  
TCTTATTTCCAGATACTAGTGAAAAATTGTGGACAATCTCAAATGACACCGTAGCAGGTGACCTCTACA  
ACTTTGCAGAAATTCATCCTTACTCTACCACAGTTTGACTACTTAACAACCTTTTCTAAGCTTCTTCTCA  
CTTGAGGCTAAGTCGAGATCTTCACAGACTTATATCTGGGGTATATTAAGTTGTCTAGAAATAAATATCG  
TTTTTGAAGTCGAAGTCTGGGCAAATGTAAACAGTGTGTGAAAACGTGCTTTAATCTAAGTAAGCACC  
ATTTGTTTTAATACACTTTTGCCAACATTAAAGAATGTTGTTTATGCTCCTGCTTTAGAAATTAGAGTTT  
CTATGGTCAATGAACTCCATGAAAGCTTCTTTTGACAGCTGCCTAGTTTGTGACAGTGTATTATGTTCAAAA  
AGTTGTCAAAATGCTTGAAAAATAAAATCTGTAGGGGAAGGTCTGGAAAATAACGTGGATGAAGCAGA  
ACCTCGATTTTTAATTCGTTCAATTTTTGGCGCGTCATCCTTAACAGGCCTCATAACGCTGGTCTTGTG  
ATCTTCAGTCAGCTCAACGGAACCCATTTATCAACTTTTTCTGCTTTTTAATGGTACTCAGGTGGTTGAC  
AATACTTGATTGTGCTTGTGCTTAGCTTTTCTGCAAGCTCACGTAGTGTGTGCGAGAGTCTGTATCAACT  
GCTTCCCTTAACGTGTTTTTCATTAAAGGATGGCTTCTTCTATGACCTTCGTGGTCTTTAAGACTTTCAT  
CTCCATGTGCAAACTTTTGCAATCAACGCTCGCTGAACCTTTATGTTTCAAGTACAGATCCATGGCCGAATG  
CCTGGTTGATGTTCCGTGTAGTTTCCGTAGCTTTCTATCCAAGTTTGAAGTCGTAGAGGAAAATCAGACG  
AAAGTTCTTCTGTCCATACTGCCTTAGAGGTTGCGCAACTTGATCTGAGTAGAGTTGAAATAGCAGACA  
ATTAAGACACCTTGTAAGTGACAAACGTTGGATTAAACCAATCAACGTAAGTTACTCAATATTCAGCTTC  
TAAATTTTCATCGTGATAACTCCACTTATCTATGGATAACTTATTATAATACAGTGAAGTTTGATAAACAG  
TGAATGGTCAGTTGAGGGGTTGGCTGGAGTGCTTTTCCATCCTACATTTATGCCATCTTTGTCTTGGT  
GATTTCTAATGTTTAAAGTCTTTATAGGACAAACAAACGATTGGAATTGTTTGTATCTGCATAAACTTA  
ACTCAATCTGTTTTCTTCTCTCACCAACCTTACATCGTGCAGAAAGTTTCGTTGGCTATGGCATAACC  
GTGCTTAAACATATCCCTCTTAGAAGTAGAGTTTGCAATCTTCTACCATTCAGTAAAAATTTTTTTTCTC  
TTACTCAGAAGTTTACTATTATCTTCAACATTCTCACAGAAGCCTTTTTGAACCAAGGAATGACTCGGCC  
ATCTTCATCATAATTTCTTTTAAAGTTGGTTCAACTTCTGAGTTGGACCTCCTGTTAATGGACCATATGAA  
AATAGTCATCGAGGTTTATTTGAAACTCGTGCTTCCACTCTGATTGTTGAAGTTTGGCGATGTTGAAAGC  
TCGTCTGATCTGTTTAGTGCTTTTGATAGTGATGAACGATACGAAGATTGAGTATGGTTTGATAAATT  
TGTGATTATCAGACACTCTGTACAACGATTGCTTTGGTGATGAAAACATCTCTAATGACCTGTTGACG  
AGTAAATGACATAATCTGTGATATTCCATTGTTTTGATCTTGGATGCATTTACATTGTCTTATATTTATT  
AGCTTGTCTGAATATGGTGTGGTTATAATAAGAGACAGTGCTAGACACATTTGCTCACGAAAATCAAG  
TCGTTGCTGTTTCAATTGCCACACTCGTGTTTCTCTATCACTCCTTTCCACTAGGTACAATCCTTGCCGAC  
TCGAGCATTAAGTTACCAATTAAGATGAAGTTGTGCTTAATTTCAAGGGTTCTGGGAACAGTGGGTAAAG  
TTTGCTTAGCCTGTTATCCGATCTTTTCTGTATTATTGGTAGCTAGATCATAAGTGCTGACAAATTGTTT  
CTTGCGCTTATGGTTTAGGGTAAGAAGAAGTTAATGTGTTTTTCAGTAGGTTTGATTTGATGGCCAAT

CTCACTCTATAAACTCTACCCTCGTTCTCCGCTCCTTTCTACAGAAGAAGGTATACGCCATCTCTAGTT  
CAGTCAATGACCCGCGAGCCTGATTTTACAAAAGCGCTTCTAGGTCAACTTTGTAGTGTGCTAGCTCTCA  
TCAAGTAAGGACAGTTACTCTGTGGAGTTTCGTTGCATTGTTTCTGTTTCATGGAAGTGCGAGCGTTCCAT  
GCTCTTTAAAAAGATTTGTTTTTTTTCCCCACTTTCAATGTTTTTCATTGACTGCATGAGGAATAATTT  
TTCAGCCACAGTGAAGTGGGCAAGCAATGTTTGGTGCAGTTTTTCTAACATCTTCCTTACGACGGTGAGT  
AGTGCTGTTCTGAATAAGGCTGATTGAGTTGCCACGAATGATGCTGAAGTCTCCTATTGCCCTAAGTACA  
GAGAAGAATGAGCATTTGTCCAGGACTGTTTGGTGTAGATTCCCTTGAAATGACTGTGAGTGGTCAACA  
CCACCTGTCGCCCTGTCACTCACCCAATGCCGCAAGCCTTATAAGAACTAAGAAATGCAGGTGGATTG  
AACAATTAACATATGCCCTGAGATATTTTACAATGGGAAAATCGTTGCATTGGGACAGTCCCACTCTTTTCG  
GCCAAGGAGTCAAATTCAGCAACATAGAGAATCGTTACGACTGGGGGCTTTGCAGGCTGTAGTGGATGG  
CCATGACTTGTATCGTGCTTTGTAAAAACCTAGGCACCTCGACAACACCTTGCTGGTACACCTTCATGTT  
CGTTAGATCCACTGTTGAGCTCATCAGTCCAATCATTTAAATCAGTCTTCACAAGCCATGGGTATACACA  
TCCCTATCTCACGAGAGTTTGAGCCCTGACGGTGAATAAACGTTTTACGGCTTAATAGATTATTTTACA  
ATCTTTAGAGATTAATAAAAATGGGATACTTAGCCACAAAAGATGTAAGTATTTTGAAAAATAAGTTTA  
TTTCTGGTATCACTTCTATCTAGGAATATTTTAATTTATTATATATATGTTGTATCATGAAATTGTGTTG  
ACGGATGTATTGATTCAAAAAATACTTAATGACCAGCGTCGTGTTTATGAAACAACAACGTACTTTTATC  
TCCATAACTAAAACTAATGCTTACTTCTCAACTTCTAAGATCAACTTCAAGTTGCTGAAAAATTTTTCACA  
TAAATTAATAAAACATTTTTCTAAGAGGGGACGTTTTATTATATATATGTATAAAATTAGCTTGATATGT  
AATTATTCAGCCAGTAATGCACGAACGTCTAACCAAAAAGTATACAAGCAAAATTCCTTATGAAATAATGT  
CATTACTTAAGTTGGGTGGACCAACAAGAAAAAGTTGGGATCTCCAGTAAATTTTCGTAGTGGAAAGCAT  
AGGATAATACAGGAAACGGAGCTGAAACAGTGATAAGAAATGATTATGGTTTCAGGTAGCAGATAAAAAAGT  
TATTTGTTGTTTTTGGATTGATTCAAGTGAAAAGCAGATAAAGTGGAGACCGATTGTCAATTAATAGAATG  
TTGAATTGTATGGTATGCTATATTGTTAAAGTACTATTTTTTGGTGAAGCTCCCACTAGTATCTTTGTATA  
TTGTACGATATCGTAACCTTTGTGTGAAATGATCACGTGATTTTTTAGAAAGAAATGTTCCCTTATCATTG  
TTATTTCTCTTCGGAAGACGTGTGTCAATTTTAGTTAGCTACCTGATTTTTTATTGTGAAGTTTTCATA  
ATGTTTTTCATTTGATCATGTTATTTATAAATTTCTATTGATTTAACAATAACAACCTTCTCTGAAAAAGG  
AAATTTTTGTAAATTTGACTTTCTAATGCAATTTAGCTATAATTTATAATTACACTTATCCTTTCTCTTT  
CGTGATAAGTGTAAGGCCACACATTTTATAGAAAAGCTAGAACTTACAAAAAAATCAATGTTCCCTTAAAA  
CCAACAAAACCACAACAAGCTCTCATGTTCTAACTTTAACACCGGAATTGCTTAATCTGTTTAAAGATAT  
AGTAAAGAGCAGTTATTTATCTAGTTTTTGTGAGAGATCCTCTGTGGGGAATTCGACAACTTTTCGGAC  
GTATTGAATAAATAAATAACAACTATTGCTATATGTTACGTTTTGTAATTTAAATAACCCGAAATTGAA  
ATTTGAATTTAGAAGTAAATGAATGTCAATATGTATTAAATTTACGATATTTTTCAACAAGATTGAGAC  
ACAAAATGTCTTTCTTGAGGTAAATATATTTTAATATACAGAGAACCATAACAATTCATAATAACTGTTA  
ATACAAATAATAACTTATATACAAATATTTTACGAACTCACAGACAATACTCAGTTTTCTATCTGATCTG  
AGGCCCGCCATGGCCAAGCGTGTTAAGGCGTGAGACTCGTAATCTGAGGGTCGCGGGTTCGCATCCCGGT  
CGCGCCAAACATGCTCGCCCTTTAGCCGTGGGGGCGTTATAATGTGACGGTCAATCCCACTATTTCATTG  
GTAAAAGAGTAGCCCAAGAGTTGGCGGAGGGTGGTGATGACTAGCTGCCTTCCCTCTAGTCTTACACTAC  
TAAATTAGGGACGGCTAGCACAGATAGCCCTCGAGTAGCTTTGTGCGAAATTCAAAAGCAACAACTAT  
CTGGTCTGAAAAATAAATATCTTACTGATGGTCCAGGTCCACGATGAGCGAATTAATTCTAAGTTGACATT  
GTTATACTTTTCTTGACGGGAAAGCTAGCTAGCTAAACTCTTGGCTGGTCTCTCGCAGTTTATAAGTTCA  
CTTTTACCGAGGAAGATGTGTAATGTCCTCGTAGGAGCAGCATTAAAGTCTGAAGTTGAATGGTTGTAA  
TGTTTCGAAATCTATAAAGTGCCCTGGTCTGATATCTGTAATTTTTTGATTAATAAGCGTTTGTACAATTA  
AAGCTTTTCGAGGCTTATAATATACTGAATACAGTTGACCAACAATATTCTAAAACGGTCTCTTAGTGT  
TGATTTATAGACTTTATGGCGAGGTTCCAGAAAATTTGGCAGCAATACTGGCACCCACTATTATTTTATAT  
ACACACGTTGTACATAGTTGATTCTTACACTCGAGAATCTTCTACAAATGTAGAAAACAGGTGGGACTCG  
CGAAATACATTTTTTAACAATATAAGTTATGTACATTTCTAAATATATATTTAAAGTGAAACAAATACAGAT  
ATTAAAATAATATTAATCTGTTACATATAACATTTTAATTTGTGATTTTAATAGTAATAAAATGTTGAC  
CACTTAATTAAAAACGAACTTTTTAAAGTTATTTTGTGTTCAACAATATTATTTGCCCGTGTATTTATGC  
TACAGTGTGGTTTACGCGTGTGCTGAGGCCACAGTTTTGTTTAAATGTGTACTCATGTTACAGTGTGATT

TGCATCCAATGATGCTTCAAGGTGGTTTACAAGTGACACCTCGTGATGCGACATTGTTGTCAACAAGTG  
TATGCGTCTTAAATGTGTTTTACTCATGCAGTAAATCTACAATGTATTTTACTCGTGGACTGCTGTTAC  
ACTATAAATTTGGTTGAAATAATAAATGTTATGCTAAACATGCAAATACCAATTTTAAACAGAAAAGGCG  
AGTGTGTTGTGGAAAAAACTAACATAAGAAACCGAAATCAGTTGAAATTATTTAAATGAATAAACTTAA  
CGTCAGTATCTTCGGAACCTACGCAGACTCAACGACAAATCTGATATGTATTGCGAACCGTAATTTAAAG  
AACGAAATATAAATTTTCCGTAAGTTACTGTTTCTGCAATTCTTAGCATGACTGAAATAACCAAAAAATA  
CTTTTACGCGTGGGTGATACAAGTAGCTTAGAGCTTTGGCTCTGAATGAAACCAAAGGTGCAACAGAATC  
AACCTTTTTTAAAGTCCATGAAATAATTAACCTTAACTTTTCTGTCTGCTGGAACGGGTACTTTTTCTTG  
CTGAAAAATAAAATAGTAAAAAAAAGACACATAGAGAACCTATTACTAGTTTCTGAAGTCTTGAAATGAGG  
ATGATTTGATACGAAAAACAAACCGTGAATAAATACTGAACTCGTAGTGCATATCAGAGATATTGAACT  
TATATTGGAGATGGACTGAAATAAATCATCACTGGAGTATACCCACTCCAACTATGTTGTAGTTTCGTAA  
TCCCAATGACATATACAATTAGAATAGAAGATTTATGCTAGTCTTAACCTCTTTGTACTGCCACCCATGC  
AAAATACGTAGTCTGTAGTCTATATAAGTATCTGGTGAAGAGACACTTAGAAGTCTTATAAATCAATAT  
TATTTATTTTATTATATTCTCTATTTTATTGTATGTTAAACCATTCAAAATAATCAAACCTCTCTCTC  
TCACAAACAGAAGATAAAAAATCTGATTCTGGTTATTCTACATATTTCTGTTTTAAACATTTTTTTACTT  
TCGATTCAAATCATCATATTTAATTTAATCACTGGTGGTGACCTAAAAAAAACGCTAAACAGAAAAATCA  
AAGTGTTTAAAGTAGTATTGCGATAAATTTACTGTAAACAAAATATAATCGTTCCCTCAGAATATCGATA  
ATTTGTCTAAGGGAACATCTCATAATATCTCAGGCTCTGTTCAACTACTATTTCTATTGAAATTTTGTA  
AAAACCTTACGAAACTTTTCATTTTTTACGTAGTTTTCTTAATACAGCTGGCTTTTATGAGTGGTTCTAAAC  
ATGGTTAAAAAATATATAATGGCATGTGGACAACCTATTCCAAAGCTGACGTTTTATAGAATATTTTATT  
AAAAACGACAAGCACGCTCACATAGAACAACGAGGTTTAAATTTAAGTCTATATGGCTGTTGTAATACTTG  
TGTTAAGTTTGTGTGGCTCCTGAGATACTTAATTTGAAGTACTGTTAAAATACGTAATTTAAAGTTTGTG  
TGACTGCTGAAGTACTTAATTTGAAACCTGTATGGCTACTGAAACACTTAACTTTAAATCTGCCTGGCTT  
CTGTACTGTTTATCTGAAAGTCAGATGGTGACTAAAAAGCATAAATTAAGGTTTGTGTTATGTGTGTGAGC  
ACTGTAATGTGATGATAGGTCTACTTTATATTTCTCACAATGTTCTATAACTGCATGTTTTCCAACTGT  
CACTGAGTTGTTGGTAATTCACCTTTAATTTGTTCTTGCCCTCAGCTAATTTAATTGCATTTAATCTGAT  
TTCCGTAATCGATATATAATTGACAAAGCGTAACGTAGGATTTCCCTTAGGCCTAGCTTCTTTCTTTGCT  
ATAATGATGGTGCTTGCTTGCTCTATCCTACTCCTTAGTTATTTTTGTCAAATCAACACTTCCTTTAAAG  
AATGTATTCCGATCCATACCCTTTACAACGTTGTTATTTTTGTGTGTGGTAAGTGAATCAGTTAAAAAC  
CATTTCAAAGTATTTCAGACAACCCGGCAGTAGGAAGCTTTGAAAAGTAAAATAACCAGTTTTTTGAATAT  
ATATGTATATTTAATCTATCAAAAATAATCAATAAAGCAAAGTCGATCTTAATATGATTATCTACTTTAT  
ACAGTGTTCAGTGTGATGAGCCCACTCACTACCCCTATCCCATGTGTAAGTTGATTTTTCTCCACCAACA  
GAATGTAAGAGGCGGAGCACAAGATGACGTAATAGCCACTCCCTCTACTGTGAAAAATAACAGCAGACTT  
GCGAAAATGCATGGACGTGGCGTTAGACGTTCTCACGCACCTGATAAAAAAATCACGAATTATGAGCCAT  
TCTTATATTCACATACTCAAAGCATACTAACTGGTCAATTTGATTAGTAATGATTGGGCTTATCTGTAAC  
AACTGGCTCGAGTTTAAAGATCTTATGGTAGCAGTTATGGTAAGGTTGGTTGTGAAGATTGGTTATCCATT  
GTTGTCTAGTTAATACTCTATACAATATCTTCAATCTAATTACCAACTACTCACCTTTTTTTTAGTACT  
GCTATTATTACGTACTAATTACCAGTTTTTCAAATATCCTGCATTTTCGGCTACTAATCTGATGTGCTTTA  
AGGAAGTCATGGGAAGAACCGTCTTCGTTATGACTCCCTTGAATACAGCAGTGGATTATCAACCAAAACG  
TTAGTTGTAAGCTAACTGGTACTTTGGCATTGAAAACAGTCAAGATAAGATATAAAGATAACATAAAAAG  
TAAATAAGTGATTAGGCGTACGCGATCATATAGGCAATGACAATTACTCTTTAATAGTGCCATCTAGTAG  
TTGTGTTTTTAAATTTCTTAAAATTAATATAATTTTTTAGGCGTTTTATAACTTTCTCCAAGATGTAAAT  
ACACAATATAAGATCTAAAATTCATATTATAATTTAATATACTCTATCAATATTTTGTTCATACATTT  
TTAAATATAAAAAATTATTCAGTCTTATTTGATTTGAAACATGGATTCAAATTAGGGCCAGGATAAACT  
TATTTCTGACAAAGTTTTTCATTAGCGTATTACTATTTAATACTTATTATCCAGATGTGTTTGTATATTTT  
TGTTATAGAACACTTTGATACACATTGAACTGATATCTCTGATAATAATGTTGTTGTTTGTGTTTTGAA  
TTAAGAACAAAGCTACACAATGGGCTACCTGTGCTCTGCCCCCACGGGTATCGAAACCCGGTTTTTAGC  
ATTTGTACGTCCGAGACATAACGCTGAGCCGCTGAAGGGTCTCTGATAACGAAAAACCGTTATGATGAA  
ACACGTGTTAATAAGTTTTAATGATTCAAGCAGTATAACACCAGCTTCCTTTTTTATGTTTTTTGTTAGGT

GTGTTTTAACTATTTTTGTTTTAGAACACCTTGTTTTTACAAACGGATCGTGTAAGTCTAATACAAAT  
AAGAATCATTAATAGTGGCGCCGAAGACTTCTGTTATTCTAACACCATGCTAGAATGTGTTGGCCATTTC  
TCAGTCATTTCAAGAAGTTTAAGATTTGAAGATATGATGTGTTAACATTTGAGATCAAATTCATGTATGC  
GTGACTACGGCATGTGAATGCGTGAGCTTCCCTTAGAACTGTTGTTGGTTGTGGAATTTGCTTAAAGT  
TATATGCGTTAGCCGTTTCTAATCAGTAATTTTGAAATGATAAACTAGAGAGAAAGCAGTAATCAACATC  
ACCTACCACCTAATTGTAGGCTATTCTAATCGAATAATTGGATTTAACCGTCACTCTTATAACGCACCCA  
CTGCTCCATAATACGGAGTGGCAACAGGACGCGAACTAGGGAGCCTCTGATTCACAATTTGGCACGGTAA  
TCAATGAATGCAATAGGTCCTTCAATATAAATACATGAAATATATGAACTTCATAGAGACTTTTACTACG  
TACATAAAATATACGGATTTACACGGAGAATTGGTTTTAAGTTCATGATAATATTGACTTTTCCAGTTCTG  
CTTAATTTTACTGACTCAGTATACTGCGAGAACATACAGAAATGGATAATTTAGAAAGAAGAGTGTGATT  
GTTTTGAATTTGCGCGAAAACTACACGAGGGTTATCTGTACTAGCTGTTCCTAATTTAACAGTGATAGAC  
CAGAGATAAAGCAGCTAGTTTATTAACACCCACCATCAACTCTTGAAGTACTCGTGTAAGAACGAATAGTG  
GGGTTGATTATTACTTTATAATGCCTCCATGGCTAAAAGGGAAAGCGTGTTTTGTGGGCCGGGATTCGA  
TCCCACGACCTCAAGTTGCTAGTCGAGCTTTCTAACTACTTGGTCATGTCTAAAAAAGCTCTTACAT  
TGTGATGAATAATTCTGCCAACTCGAAACAGTTTTACGAGACAATATGTGTTGAATTCACCCCCAAT  
GGCTTTAGCTTTTATTCATTGCTGAACGAAAGAAAATTAACAATATAGGGATTGAGTGTCTTAGTTGCTT  
TAAATAGAAGTCCAAAATCACAGTCAAGATCAAATCAAATTAAGGCACGTAAAAAAGTCAGAGATAT  
GACTTGGGCTATATACATTTTTGTTATGAAGAAAAGTTTTCGGATGGTCCAAAGTCACCAGTATGTCTAA  
AACTAAAAACAAACAAAGCAAAAGGTTTCACTGTGAACATCGAGAAAATTGTAATCCTTGGTAAACAAAA  
CAAAGGGAAAGAAATTAATAATTTGAAGTTATTTTTAGATAGCTTGTCTTAAAGGACATTTTAAATGTTT  
CTATTTTGTACGCAGTTTAACCAATGTGCCAGTTCTTGTTTTACTTTGCATTTCTTAACGTGCAGCTAT  
GGATTATAATTCTTTGTGTTAGGTATATTGATCTTTAGGTTTGGAAATGTTATATATTGCTGAGTCGGA  
AATAAAATAACTAACATTTTATTAATAATAATACTTTTTCTGAAGCTCGAAACGTTAAACTGTAAACC  
AACTGATTTCAAGTGTATTTTATTTTGGTTTATGTTTTGAAAGTACATTTTGACAGTTTTTAGAATATTT  
TAGTTGGTGTGACCATTGTATTTGCTGTTCAAGACTTCGAAAGAATCTTTAAACAGCTAAAATGGTACA  
AACACTATTTTGGTGTGTACATCTACGTAATGGTGTAAAGCGACGAAATATTAAATAGTTTTGATGTA  
TACAAGTTTGAATTATGACACAAAATTGTAAACAATGTGAGTTTGGTGTACCTGGAAAGTTTTGTATTT  
AAGGGGCCCATCATGGCTAGGTGGTTAAAGCGCTCCACTCGTAAGTTGAAGGTGCGAGGTTTGAATCCCC  
GTCGCACCATACATGCTCGTTCAAGTCAATTCCACTATTGCGAGGTAAAGAGTAGCCCAAGAAATGGTGG  
TGGTGGGTGGTGTGACTAACTGTCTTTCCACTAGTCTTACACTGCTAAATTAGGGAAGGCTAGCGTAGA  
TAGCCCTCGTGTAGCTTTGCCCGAAATTCAAAAATAAACAAACAAACAATATCTAAGACAACGTAAGTAA  
TAAACAAACTCATGTGTTTGTATTATTAACAACGAGTCTTTTCTAAAATATGTATGTGTGTTTTTA  
TATTTATGTTTATAAATGTGTTTATGCTAATCTATTAATTTGTATTTATATTACGTTCTTTTCCAGCATC  
GTATTGAAAATGTTTAAATTTTGTATGGGAAACGCTTTTATAAGAATAATATTATTTCTCTCTAAAAA  
ATAACAAGCATGCTTTTTCAGCATTTTTCAGCACAATTTTCTTCTTCTTTTCTACTGACAAAATTT  
AAAATAAAAAGCTAGAATTTATCCGAATCGAGTGCCTATATGATCACAGGCACTAAATCTGGGGAGCCA  
GTAAAAGCATCAGATACAAATCGTTAGGGTTAATACACTACTTCTTGACCTTTATAGTCAGTGGCTCTTT  
TTTCAACGTCTAAGAACGTTAGTCTAAAGAGAAACAGACTTTGAATGGACGATAGTGACACTGATCCTTA  
AGAAGCTGTTTGTGGCACCTTGCTTTGCTTTTGTTCGATTCTTCATCTGACAAGAGAGACAACAGGGAG  
AAAAATCTATAGATAAAAGCTTTTTCCGTGAAAATAACTGGAACAAAGTGGTTCCCATGTTTTCTCAGCT  
TTCTTTGACTGTTATAAAGACATGAAGTAGAAAACAAGAGAATGCGAGTGGAAAAAGACGCATGAGTTAC  
AAACACCAAAAGTTTACTGACTTTTGATAAGATCTCTGAACATAATGAAAAGAGGTTACAGATTTTCAT  
TGGAGATTTTCTGTTAGTACGCACAATAAGCGAACCACAGAGTGAAAAGTTAAAGTGGACATTAAGAAAT  
TGGAGCTAAAGTTACATCAACTTAATCGGATTCATATTTTGAAGTGTGCACAATTTTTTAGCTTTGGAAAAA  
TGTCAAATCATAGCGATTTCTTTACAGCCAATCTCATAAGCATGGAATATTACGTACCTTAGAAATTA  
GAATGCATTAATCATAAAGCAAGTTGTACTGCATAGTTTTAGCTACCTGTCTATCTTTTGCAGTTTCTGT  
TAAATTTACATGGTTACGTTATACACTTTGTTTTTGGTTAGTGTCTTTCTTTTTTTTATTTTGCAGCAAGC  
TAATCAAAGGCTATCTCCAATAGCCATCCCAATTTAGTAGTGAAGGACTATAGGGAAGGCAGCTAGTCA  
TCACAGCCACAACCAACTCATCGGCTACTGACGAATTGTGGGATTAATAATCAGGTGAGAACGTAACCAC

GGCTCAAAGGACGAGTATGTTTGGTGAGACAGGGATTCTGAACCCATGATCTGCAAGTTGCGAGTCGAGCA  
CCTTAACCACCTGGCCATGTTTAGTGTATTATATAATACTGATTTATTTGTTATCTTTAAATGATCAAGC  
CTTAGGAACAAATGTTTGAAAGTGTTATTCTTTTGTGTCCTTTTTTGTATTGTATAAAATTGCGTTATTTG  
ATTCACACGTATCCTTCTAAAAACGTTTATTTATTGAACTCATTGATAAAATTTAGAAGCGAGAAACGTA  
ATTTCTATATATTCTTAATATTTACATCCACGCCCCCCCCACGCGAGCAGCAGTAAGTCTAAAAGCTT  
ATAACTCTAAAAATCTGGTAGCGATAACTGTGATAAGAAAATCACAGATAGCACAAATGTTTCAAGTTTGTG  
CTTAAGTCTAAAAATGAAAACCTCTTTTCATAGTAATGTAATACAGAGTAATAGTTATCTAAATGTGTTT  
TTTTATAGCAAAGCCACATCGGGCTATCTGCTGTGTCTACATAGGGGAATCGAACTCATGATCTTAGCGT  
TGTATATCCATAGACTTGCCGCTGTTCCAAGTGGGGATATTTATCTAAAGTTGGTAGTGTTATTTCAATT  
AAGATGGGTGTAAGTTTTTGGTAGATGGCTGAAACTTTGTCTTGACTTAAGTACATAGAACGGTTGATTT  
CAGAATTATAATAAAATTATTAATTTAATAGGGAAAAATAGAGACCATCAAAACCATGTAGGGGCAAAGT  
ACAACAATGAACTCGAGAAATGATGAGTTTCCAACGTGGCAGTTTCCAATTAAGGCGCTATAAGTTGTAC  
AAATTATTTTCCAATTAATATTCATTAGTAAACTCCGTATTTTTTTCAGTGATGGATAGTGAAGGACTTA  
GAGAAATTTTTCAATTAGAAAAACGAAGGTGTTTAAATTAATTTTAAACTACTCTTTGACATACTCAA  
TACGACATTCAGTCTATTGTTCTGGTTTCAGTAAATATTTGTAGTCGTTTTTCTGTAGCGGCTTATA  
AACTATGATCAACAACAATAATGTTGGAGACATTATAATAAATACACGCATTTACTCTAATAAAACTAA  
ACATTTAAAACCGATATAAGGGGTCTTAAATGGTTTGAAGAGCTTATATTAGTAAAGAAGAAGAACTTG  
GAAAATTTTAAAGGTGGAATCTCGACTTTCAAGAATCACCACGACTTTTCGAGGAATTTGTTTAGTAG  
CAATGCATAGATTTTGGTGCAGTATATCTAGCCGTTTTTGCAGTAGAATTCAATGCTTTAAACACTTTGG  
AAAAGAACTTGGTCGTCAGCGATAAAAAAAAAACGAATAAAATCTCTCTTCTCCTTCAAGAACCAAGATA  
AGAGTAGTTCTACGACCTACACAGGCTTTTTTTTATAGTAGCTTTGTGCGAGATTTGAATACACATTCATAG  
CAATTTTTTTTTTTCGGTAGTCTTGTGAAACAATAATAAAATTAATAATAATGATAATAATATTTAAATCG  
AACGAATGAATTTTGTCTAAAAATCGAAAACTGACTTTTCTTTTTTGCAATTATCAATATTTTGTAGC  
CTTAGCTATTTGAGATAGAAATTTTGTAGTGTTGTTTAAAGAAGAAGCCTATTTTGAAGATATTTTGTCT  
TTTATGTTCTATTAGAATTTTGTGAAATCCATTTTCATGGTTAATGACTAATATATCATAATTAACGTT  
TCACCTTACGCCCTTCATCAGGTCTTATAGATTATATTAATAACACAATTCGAACGCCACTGAAAACATCA  
GTTTTAATATGTTACGATATTGTATATATATTTTTTAACATGAGAAATGGGATAATTAATTTTGGAGT  
AATTTTCTTTATTGTCAAAAAGTAATGTGCAATTTGGTAATAAAGAATGCATTAAATACAATTTCTAGAAAG  
GCGGCAGTGTACATGATAGTTCTAGTCGGAGTGACCCTGGCGGAAGTGGTGACGAAGAAAACGAGGCGAG  
ACTGCGGTTAAAAAGAAAGTTACAGAGAAATCGAACTTCATTCACTCCAGAGCAGATTGAAGCTTTAGAA  
AAAGGTAAACAATTAACGAATGGATTTTCATGAATTCAGATATTTCTGCTTAGGTTATTAGATGTTAGG  
TGTATTACAGATGTTTGACGCATCTCTTCCAAGAGTCTTAGGCCTATGTAAGTTATAAAATAACGAGAACA  
CATTTACTTGGGATACCTGATACTTCAATATTTAAGACATTTGCCAATGTCACAGAATATAAGGTAGAAT  
ATTTACAATAATTATTAACCTTTTATTAGTTAAATATGAAGTAAACAGCTTTAAATGAGTAAATTAATTTT  
ATTAACAACTACATCGTTTCAACCACACATGTAATTATCCTCAAGTTGGACTGGTTCTTTCTCATTATTC  
GGTTAAATAATAGCATAAACTTTAATACTGAATGGTAGCAAATAAGTTTCGTTATTTTACCACAAT  
GTTTTCGATTAACTTAACCTAACGCTTATTGATAGGTTTAGATTCAGTGTAGATGCTTACACAACAATATC  
ACTTACTAATTTTTCTTGATCTCTAACAACCTTCGTAAGAGCAAACCTCAATTTTCATGAAACAGACCTAAC  
AGAAATACCTGTCAAAAATTATTCAGAATAGTGATTGTACTAGAGGCTAGGATACAGGTAATAAATTAATT  
TAATATTTATATAATCAGAGATGGCATAAGAGTTTTTCTTCAAGAGTAATTATGTATAGTTATATGTAAT  
ATAAAGTATTTTTAACACTACATTCCTTACTCAGAATGTTTGTTATTGTAAAGGTGACTTATAACTGGT  
ATCAAAATGTACGTTAAAAATTACATTTCAAAACACAATAATCGGTTATATGGTAGTCACAAATATATTT  
ATGAATATTTTGCCAACAGAGTTTGAAAGAACTCATTATCCAGACGTATTTGCCCCGGAACGGTTGGCAG  
CCAAAATAGACTTACCAGAGGCTAGAATACAGGTAATAAATTAAATATTTATATAATTAGAGAGATATAA  
GATGTTTTCTTTTACAAAATAGCTATAAGTAATTAATACTATATAAGGTGTCTCTCTAAAAATAAATA  
TTGTTACATAATCCGTAATTTTCTCAAACGATCATATGCAAACACAACAACAAGAATAAATAATAGAAG  
AGTTTACTATGATAACTCCTAGAAGTTTATCTAACTAAAAGCCTCTGAGGTTTACACAATACCTTAAAG  
AGCTCTCTGCTAATACACTTACTTTTAAATCATACAATATGAATATTGTGTCATTAAGTTCAATTTAAACT  
AAGCTGTTAAACCTGGAATAACAACATTTAATAACGTAAAGGTAAGATTTACCTTATAATTCATGTATT

AATAGAGGCATAGAATTAATTAAATTTAAATCTATAGTCGTTATTTGTATTTTGAATTTATGGTAATGC  
TAGTAAACTATTTGCTGCCCTCCTTAATTTGATACTGGATAGAGGGATGGTTAGCAGTTAGTATCAATC  
ATCGTCCATGCTAAGTAATTGACAGTCAGTCCTATAACGCATCGTCAGCTGAATATGCGAAGATATTTTG  
TGATATCACAAAGGATTTGAAACCTTTAGGCCAGCTTCGAAATCCAGAGCTCTACCACAAGGCCAACTCGT  
GCCCATTTGTAATCACAGACACTATTACATGACAGTCATTACCTAACAATTGGAAATTTAAATACACATC  
CGCTAGCTATTACTGCAGAATCACCATAAGTAGTAGGATATTTATAAATAATAAAGTGTTAGATAATATA  
ACTATTGAGGATATTTCCGACATTTTATCTTTTGAATGGGACTATAATTTATCTCCTTACATTATTTCTCC  
TATTGACCACGTGCTCACCAGTAACCGTGACATTGTAACTAACGAACTTTGCGATTATTAATGAGCGGA  
AGTGCTACATTCTGTGAGTACCTTAGAATTATTTAGTAAAGCATTAAAGTGATTATAAAATTTGCTCAGTTA  
AGTGTTAACTAAATGTAATAAGAAAAAGTTTAAAGTACCCCTATTTAGAAAATGGGTAAATTAGGCCTAAT  
TTGTAGACATAAATTTCTCTTTGAACAACAATGAACGTATTAAGAATCAAAAAGAAGTTACTGAGTTTTTA  
GATTATTTTAAAAATTCATGTGTCATCAATCCACCGATAAAGCAGAAAAATATATTTACATTTTCAAAA  
AAGTATTACGACTCTATGTAAAGAATTAGACTAAAGTACAAACATTAAAGCTTTTTTGTGTGTCGTTAAGC  
GCAAAGCTGAACAATGGACAATATGTGTTCTGCCATTTTCGGGTATCAAAAATAATTTTAGAGTTATA  
AGCTCTATGACTTATGGCTGAGCAATCAAAGACCAAACGTAAAATTTTGGGCAACGAGTTGTAAAAACA  
TATTACAGTCTGAACAACTTTTGTATCGTACAATATGAAACGTAGATTATAATGGATTTCAAAGATATA  
GAACCTTGAGATTTATCACTCTAATATTTATAGAAAAGTAAAAATAAGAATCTAAAAAGGTAACTTTCAA  
AGAAATTGCAACCAAGCATAACAGAAATGGCTAAAAATTGCAAAAAAAAAAATATACAAAGATGGCCCA  
AGAAATGCAACCAAAATATACAAGAAGCCCTTGAGGTCTCGAAATTAACGACTGCCTGACGTCCCGAGGT  
ATGTTAATGTTACCTGCGGACAACAATCCTTACTATGTCTATTTTCCGAGCGCGCAAGTGATATTTTACG  
TATAAATAAATGTTTTATTGGTTATTTTTTAACGGATTTTTGCTGATAATGAGCGATAATAGCATGTAATG  
AAATTTAAAGTCGGGCAACAAGTTGCGATTTCTTTCACTGATGTCGAGAAAACCCACCTGTAGTGAAAT  
AAATATGCAAAAACGAGTCGTTTTTGCATATTTATTGCGATTTCTTTTATTAGACACTCTCCCCCTGCCG  
CACCGACGACACATGTTGTAGCATGTAGATTACAAGGTCCGTGTGTAATCTAAATTGAAGAGCCTTCAGT  
AGTTTACGTGTGCCGATGACATCACCTTCGGGTCTGGGGTTTCAGGGCCAGAGATTTTTTGTGAATAGAC  
ATCCTCCCTCCGATATCTGGCTGTCTCCATGTAATTTACTTAGCCCAATAAGTCCGTGCGTCCAATAAAC  
GGAACAGCCGTTGTTGTCTGTAGTTAATGTGTAGTTTTAGCAAAGAATATGGCTTTGTTAAAAATATTTCA  
AAAAGCGAAGGGAATCTGATGATGAGAGATTAGAATTGAATACAGAAAGTGATATTTAAAGACAACAGTT  
GTACAAAGTGAAAGGAACTCTGTAGTGAAAGCTGTGAGGAATGAGAATGATAAAATAGTCGAGTTAAAAAGC  
AGGCACCACCGTGAGTGTGTCAGTGGTCAGTGTGGGGCCATTTCTGCCGTCAAGGCAGCAAGACCAAGCAGT  
CAGCGGGGACATCCATTGTCTTCGGAGGAATGCAATGAAAAGTATGGCTTGAGAGAAGCGATCTCAGAGTT  
ACCTGCCGAAATGGGAAAAATAATTCCTTGTTAGAGTTTGATCAAGAACTAATGAAATGTTTTGGAA  
GGTACGCAAAAGCCACAAAAACGTGTGCCAGGGAGATAGTGTCTTTGTAAAAAGTACCAGTAATTTTCAT  
CTACAATTGATCTAAGCCCACGATATAAGTGGCAGGTATACTACGTGTGTTCAAGCTGCCAATGCTAAAG  
CTAACTCACAGTTTCAGCCGATGGAACATATGCATGAGAAATTTACATGCTTATCAGCTTGAGAACTGGA  
AAAAATTTTCACTACCGCTATTACTTAGTAGTAACCTGAACAGCCGTTTTTTTTCGTTTTTGGGTTTTTATGT  
GAGTTACAGAAAAATAATGGAGTGACAGCTGGGAGACACGTACATAAATGACAAATCAGCGAAGAACTTTA  
TTACATGTATTTATGACATCATGATGCAAGATCTGTGTGCAGACCTTAACAATGCTGCAGTGTTTCCTTC  
ATGTCACATAGATCTGCAGACACTGAAGTAATTGAAGAAGAAATTTGTATTTGTTAAATTTTATTAAGGCAG  
GAAATGTTACAAAATTTTTTTGACTTGCAGGCCCCACCCAGTGGTACCGCCACAGGATTAAAAACAGCAAT  
TGAAAAAAACATTTGAGACAGTTGGTGTGGAGAACTGGAAAAGAAAGACAACCAGTACAGGGACTGATGG  
TGCTTTTCATCAATACTGGAGCAGAAAATGGACTAATCGCACTTCTTACTAGAGATGGAATACCATGGTTA  
GTTGGTGTGTAGTGTGTGGCCACTTGTTTGAAGGGGACTGTTGGATGCTGTGAAGGAAGAAAAGTTTTT  
TATTGGACATAAAAGACCTTTACAACTGTATCGTTTTGAGTGCCAAAGCAAGCAGGGAATTTAAAAAGTGT  
CAGTGATACTCTAGAAGAAAAAAACATTAAAATCTGTGAACATCCTAGGGACAAGATGGACTCCTCATCT  
TTATAGAGCACTTGAAAGTTTTGCTGAACAAAAAATTCAAATCCATATATATGCATTTAGACCATATAGCT  
GAGTCAAAAGATGCTAGTGCTATAGTGGTTGGGAGAGCTAGAAAAACCAACAGGACATGAAAAATACAA  
GACTTTGTTGTATATGCATTTTCACTTGTATATCTTGTATGGATCGTCACTATTGAGCTTTAAGCTTCCAA  
CACGATCAGGCTATTCTAACTAGCTCACTTGATGCACTAAATACCTTTGTTCTTGCTATAGAGGGCTTCA



AGCATATGAATGGAGAAAAATATAAAACACTTGATCCAAGATATTGGTGAAGGCAATCAGTGGCAAGAGAT  
TGAGCTCACTAAACATGAGTAGGATCTTCAACAGTTTGAAATTGCGAAAGAACGCATATTGCAGAGAGTC  
AAAGATCATACTCAGAAGAGATTTAGACCCTCTGTGGAGAAGGAGCCAGTGTAGGCGGCCATGGTGCTCG  
ATCCAAGAGACTAGCCTTCCAATGAACCTCAAGTAGCTCTTGTTGTGTTTGGGGTAGATCAAATTAACAC  
TGTGGCAGCTCATCTGAACAACCTCTTCGGGTTGTAGGCTATGATAATGCTGCAGCATTACGTGAGTGG  
CTTAACCTAAAGACGTTCTCTCAGAGGCGAAACAGTGTTTCGAGGCATGGACCTTTACCACCTCTGGAATT  
GGATTTTTCTCCAATTTTCCGACAGATTCCCAAATTTGTGCCTTTTGGTACAAATCATCTCACACTGCT  
AATGAACACAGCATGTTGTAAAGGGGATTTTACATTGTGAAGAAAATCAGTCATGACTGGAGAGCCAGT  
CTAGATCCAGTCACGCTATCCATGCTTATGAGGATAGCAATGGATGGTCCAACATTAAGTGGTGGTGGT  
CCAGGAGAGTAGTGGAGTACTGGTGGACTCAATCTCGTCGTACCAGGAGGCCTGAATACCTTGATGGCTA  
AGTCTAGTCTACCTAGTACTTACCAGAGTAACCTGTTTACAGGTGTTACTCAGTACTAGTCCACTTTTAGA  
CTACTTCTAGTCTGTCTAGTCTGGTCTACCAGGATAATTAACATGCTTAAGTGACACTTACCTGATGATG  
AAGATGCTTATAATCATTGTATGTAGAGTAACATAACAACACTGAAAGTTTCAGTGCCTTTTATTGAGTAT  
TATATTTTGAAGTGTTTAGTTTTACAGATATTAAAATGCTTATTATGTTATACTTGTGTTTTATTATTGA  
AATCAGTTAATGAAATGGTATCTCTGTCTGTTGTGTCAGTCTATTGCAGTTTTTATTTGGGATAGTGACCCC  
TAAGTGCGGACAAGCAAATGTTTTACAAAGGTTACCCTCAGGTCAAGTGGTCAAATGTTAGTGTCAAGC  
CTTGAAGGAGAGATTGTAAATTGTAAACCAAGTATTATAGAGTCACCCTAAGAATTACAAAAAGTAAAAACA  
AAAACAAATCAGTCATAACCTAAAAATTATAATACAAAGATAACCTAAGGTAAACAGTTCCCCAGAGAA  
ACTTTGCCTTATCAAAATTTCAATGATTAAGGTTGAATAGACTGGAATATTACATAAACATAAAATTTTC  
TATAAATTCAGTTAGAGAGAGATAATAAAGATTATTACACCATCAGGAAATATTAGACTGAGATTTTGAC  
TGTTTTTTATTATTAGGACATTTTCATGAGTTATTAAACATCAATGATTCCTTTGGAAGTGAATTTATTAA  
TAATTTGTAAACCTCCATATTTACCATGTGTGAAAAGTTGAAGTAAATAAGCTTATAAGACATTGAGAT  
GATATCATTGGATGTTTACAAATATTTCGTGATAATGAGAACTGGTGAGAGATGCCGCAGGATTATTCAA  
CATTTGAATTTAACGTTAGTTTAAACAGTTAAAATGTTCTACCCGTTCTAGCAGTGAGATGCTAAATAA  
CATCCACAGTCTCTTTCTGTTTCAGGTCTGGTTTTTCCAACCGCAGAGCCAAGTGGCGACGCGAAGAAAAAT  
TACGAAACCAGCGGAGGGTTGCCGAGCAAGCTGCTGTGGCGGCAGCAGCTGCCAATTTCTGCTCCTACTCG  
ACTCTCTCTGAATTCAGGTTTTTCCAAATTTCTCTCTATCCGGGTATAGGACAACCAATGGCTAGTATGACC  
GATTCCTTACAAATAAGGGAACAAATTTATTATTTTACGAAATTACAGTACTTATTAGCACCTGAGAGAA  
ATATAATGGTCAATTATTTCAATTTAGTTATATGAAGCAAACCACTAATGTTTATATGTTTTCAATACTC  
TTTCTTTAATGCTGTATTTATTAAACAGTATAGGTTAGAATGTCTAATAGATTTTTTTATTAGCTTTCATAT  
TTTATTATATTTTCATTTTAAAGACTATCTCACATTGTTAGCTTAGTATATGGATTTAAGACTAACCTAA  
ATTTCCGAAGCTGGCTGGATTTGATGAGAGATTATTGAGTTTACGACCGACAATGTAGTTGAGAGCGAGG  
ATACTTACGCAACGAACAGTGCCATTTTATAGCTAAGAACATAACAATAACTTGTTTACTGAGTTAATG  
TTTAGTTTTGATTATTGTAGGTAAATTACTTTGATCAAAAATTACTGTCAAGTATTATGTATGAGATTTG  
ATATATATATAATTTATTAACGCAGTAAGAAGCTAAAATATTGGTGAATATCAGAATCTCAGAACTTGAA  
GATACACTAAAATGAAAGGAACCTTAACATAATGACATTTTTCAGTAAACCGTTCAATTTCTATTCTTA  
AAAAGAATCAATTTGCAGTTTCGTTAGGATTGCAGTTGGAATTTAACTTATCGGGGTTTTTTTAAACACGG  
GGAATGCTATACAGTTTCTTTTCATATATTACTAATACTTTTCGTAATAGATATTGTAACATATGGATGA  
TTATTCAAACAATAATAGGTTTTCTTTCTCTGAAGAATAATAAAGAAGTTCGTTTTGTTTACATTTTCC  
CTTTCTTTATCTTAAATATAGCAGTAATGCATCTATAGAAGGGCTTTTCCCTTTGTTTTTGTTAGCTCC  
ATTCCACCGATGTCCACTTACTCTATGTCCAACAATATGGCACCTAGCTCTTGTCTTCAGCAACAAACAC  
CATCTTATTCCTGCATGCTGCCATCAGGGAGTGCTAGAACTATGACGCTCTCTCCCTTGGCACCTATAG  
CAGGCCCTTCTTGTCTTACAGCACAGCCATATGTCATGCAGCCTGTAAATAGTCAATTTGCAACGGTCAAC  
AATGGTAGCGCTGGGTCAACAGGTGATGATAATTATGGTCATTCTTGTGTAATAATATATTACAGCAAGG  
TCTCTATTTTTTTTTTGAATTAACGATTAAGCAAACTGTCCTTCAAGAGATATAATAAATACTATCAATA  
GAAGCACTGCCATGAAAAACAGTGAAACAAATTTGTTTAAAATAGGAACCTTTTACGTCAATTTTGA  
CCTGGACCTACTAGACTGTGTCTTGACTATCTTTCTTCTTGATTGTAACACCGAAGAAGCTGCTATTAA  
AAACAGAAGAGTTGCATTTATAATAGATGTGTAACATTGTGTGTTTAAAGATAGTACTACTCAACTACGTG  
ACACCTTTAACGTGATCCTTTTCAGTAACTATTATCAAATAGAAGATAACTAGCCATGAACCGCTCTTGT

[illegible]
