# Supplementary material for: Evolutionary Conservation and Diversification of Five Pax6 Homologs in the Horseshoe Crab Species Cluster
Source: MDPI journal article supplement (doi:10.3390/arthropoda2010007), 2024-03-04
Supplement: s1 [file s1]

>CM022397.1:c58514305-58471536 Carinoscorpius rotundicauda isolate  
IMCB\_SINMHF\_001 chromosome 7, whole genome shotgun sequence  
CGATTTTACTCAAGCGTAAATTTTTGAAGCGTTTTTTTCTTTTTTCTTCTTCTTCATAGCTAATGAATG  
ATGCTACTCTTCCCCCAGGACACAGCGGTATCAACCAGTTGGGAGGAATCTACGTCAACGGACGGCCCT  
TACCAGACTCCACACGGCAGAAGATTGTAGAAGTGGCCACAGTGGTGCAAGACCTTGCGATATTTACCG  
AATCCTTCAAGTGTCTAACGGCTGCGTTTCCAAAATCCTAGGCCGATATTACGAGACCGGGTCCATTTCGG  
CCCCGGGCCATCGGTGGGAGTAAACCTCGAGTGGCAACTCCCGATGTAGTGAGCAATATCGCCCAATACA  
AAAGGGAATGTCTTCTATTTTTGCTGGGAGATTGAGATAGGTTGTTGTCCGATGGGATATGCACTAA  
CGACAACGTCCCGAGTGTAAAGTTTGAAGATTTTGTTAACATTCTTGTAAATTATTTCTGGTTACATAATTA  
TAATAGCAAACCTAGTAAGCATCGATACAAAGAGTCGACATTTTCATGAGGCATTCTTTTATTTGAAACCA  
AATAGACTGGACACATTTACTAATTACATTTGCAGCAAAAACAAACAAACAAAACAAAAATGAATGAACA  
AGGTATCAGGTCTTTTCTGATGAACCCGGGTGTGTGTCACTAGTCTTCGTGAGATGTGCTTGGGTGTTGGGT  
TTGTGTTACTGCTCTTCTGTAAGATGTATCTGGATTTGTGTTACTGGCCTTCTGTTAGCTGTACCTGGGC  
TTGTGTTACTGGTCTCGTTAATCTCTTTAACCTAAAGTCACGATTTTATTGTAAAGATATTGTCATTT  
TGGAAGCAATTTGATTCAACAAGAGGACATCCAGCAGTCCAATCTGTCATATGAGCATTAGTTTAAAT  
TAAGTTTCAAACTCTTGCAATTGACAAAAAAGCAAAGCAAATTAAAATAAAACAAAACGACACTTTTTTA  
TATAAATGTTGATGAAATGTCTTCCAGTTCAAGGATACTTTAACCTGATCCATTCCACTTTGACCTTT  
TGTTCTTTAATAACAGGCTTTAACATTTTCGTTACGCCGAAAACATTCACCATGTTTAGCACAAAACAATA  
CTAAAAGTATATAGTTTTTAATACTACTGATAATAACTTTTCGCTGGTTGAGGTCTGACCAATCGTATCTAAG  
TTTCTCAGCTACTGAAAAGATCTAAGATGAACAAAGTGGTAACATCCTGAAGAACAAAGGTTCTTGTTCTT  
ACTATTGCTTCTATTTTCGCGTTTTTGTCTCTATTTTAATGAGCCCGCATGGCGAGATGGTTAAGGCACCTT  
GACTCGTAATCCAAAAGTCGCGTGTTTGAATTTCCCGTCACACCAAACATGCTTACCCTTTTAGCCGCGAG  
GGCGATATAATTAATCATACTATTTTTGGTAAAACAGTAGCCTAAAAGTTAGCGACGTGTAGTGATGACT  
ATCTTTCTTCCCTCTAGTCTTACACTGCTTAATTAGGGATGGCTAGCGCAGATAGCCCTCGTGCAACTTT  
GGGATGCGATTTATATTCTGATCAACTTAACACGAATTTTCATCGAAAATCAATCCACATAATTCTGAT  
CACTTCTAAGTTTAACACCACGATAAACGGATGGACTCTATCCACAACGTTTGAATTTCTTTTAAAAATCC  
TACCATAACAACCTGACACTCGCAGCTGAAACTACAAAAAACACGACTTTCTGACATTTTCCCCAGTGACT  
ATTTTAGTTCTTTGTTTGTGTTTGGAAATTTGACACAATGCTACTCGAGGGCTATCTGTGCTAGCCGTCCCT  
AATTTAGCAGTGTTAGACTAGAGGGAAGGCAGCGAGTCATCACCACCCACCGCCAATTCTTGGGCTACTC  
TTTTACCAACGAAAAGTGAATTTGACCGTAACCTTTATAACGCCCCACGGCTGGGAGGGTGAGCATGTGT  
GGCGCGACTAGGGCGCGAACCCGTTACCCTCAGATTTTGAAGCGCACGCCTTAACGCGCTAGGCCATGCC  
AGGCTCATTTTAGTTCTAAAAAAAGTATTCTATACATACATTACATTGTTTTTTATAAGGATATTGACAA  
ACGGAGAGTTGGGGTAGAGAAATAACTTTCAAATGAAAATTTCTTTATTAGAGGTGAACCGATGAACATA  
ATAGTTTGAAATATCTTATAGTAAGGTATCGTTGCAACGGCTTTTATCATTTAACAACTGAATTAATAAC  
CAAATAACTATTTAATCATAAAAATACTAATGACTAATTTTAATAACTAAAAACACGCCACTAGTTTATG  
TGCAAATAATTTCTAGTTTTAGGGTTAAACAATGTTTAGTTTAAATTGGTTTCTTTTGAATTTTCGCGCAA  
AGCTACACTAGGGCTATCTGCACTAGCCGTCCCTAATTTAGTAGTGTACGACTAGAGGGAAGGCAGCTAG  
TCATGAACCTCCACTGCTAACTCTTGGGCTACTCTTTTGCCAACAAATAGTGAGATTAACCGTCACATTA  
GAACACAGCCACGGCTGAAAGGGCGAGCATATTTGGTGTAACAGGGAATCGAATCCGCGATCCTCAGATG  
TGCTTAAATCACCTGGCCATGCCGGACCTTCTCTTTTAATACAGCTGATATTATTCGTTCTAATAGCATT  
CGTTTCTCGACTTCGCTTAACATACTCGGAACGTACTGTGAAAACGATTAATATTTAATAATAGGTGCTC  
TTCATAAGCGAACGTTTACCGAGTTTTAAATCCTTCACACTTTGAATGTTAAGGAAATAAAAGCACTTTC  
TATGACCTATGACTTTTTAAGTATACTGGTATCAATACCAACGAGGCAGTCGAAAGATTAAATCTCCCAT  
TCCTGGGGTTCTGTGATGGAAAGTCTGATATTACTGTTTTCTAACGCTACTTAATGATGAAAAGTTAAG  
CCTTTCATTGCACAGTTTTATTCTTCTCAGATTACCATTGCATTGAGGCTTAAATGACTGTTGCTAC  
GCCTGTACATGTGGCATCTGGTTTTGTGATGAGTGAAGTAATATCAAATTTAATTGGACATTTGAGTC  
TCTTTTTTTGTACGTCATTTGTAATGGATCTGCCATACTTATTTACCCAATCAGAATGTATCTTTATTT  
ACGTAACAAAATTATACCAGTTACTCCTTTTCAGGAATAATTGTTTTGGTGTGTTTTTTTTTCAGCCACGAG  
TTCGATTTATATTCAATCAACATTATATTAAACGGGAATGGGCAACAGAGAAATCTCTAACAGTTTAATT

TCGTAAAATAATGACTCACACAAAGTTAAATTATATTTACTTGCATGAACGGCGATATCGTAGCCAAAATA  
AACAAACTCAAGATGACTTGCATTAATAATAAACAAATAGTAAGTTTTGATATCACTCGTTTAAACGTTGA  
AAGCTGGCGAAAACAGTAGGGCTAATGTTAGTTATGAAAATCACATTAGACTACAGATGTGTTTTCTTA  
TATTTTCTTGTTATTCCAATGAGTATCGCAAATCAGTTTTTTTGTGTTTTTTTTTAAATTCGCACAAAG  
CTACTAGAGGGCTATCTGTGCTAGCCATCCCTAAATTAGCAGTGTAAACTAGAGGGAAGGCAGCTAGTC  
ATTACCATCCATCGCCAACTCTTACGCTACTCTTTTACCAACGAATAGTGGAATTGACCGTCACATTATA  
ATGCCCCCAGGGCTGAAAGGGCCACCATGTTTGGCGCGACTGCGATGCGAACCCGCGACCCCTCAGATTAC  
GAGTCGCACGCCTTAACACGCTTGGCCATGCCGGGCCTCGCAAATCAGAGACATAATAACAGTATTTTTAT  
TCTTGTTATTTGTATGGTTATGTTATTTGTTATGGTAAAAAGTACTAAGTCTATTTGCTGCAAGTTCCTA  
ATTTTGAACACTGACCACAGGGTAAACAACCTAGTCAACAGAACCCTAACATTGTTTTCCGATGAAGACT  
TCAATTAGAGGGACGAAAGCACACAAATAAAAGTATTTTAAATGTAAAGAAATGTCCGTGTATAATTTTAT  
ATATTAATTTTTCTACGTTATGAGTCTTAAACAAAAATTATTACCATCGTTGCTAAGCGATTGACTCTC  
ACTCTTATACCCAAAATTTAAAGAGCAGGTAATACAATGGTATCGCGCTGGTTTTGAAACCAGCTCTGAAA  
TCCACGGCGCTAGTCCTCACCAGTTTTCGCCTACCACTGTTACGGTCTTTCGTTAATACCAAATTTCTT  
AAGTTGCGGCGAACGAGATGACAAACAAATAACTATCCATTTTACGCGGTTCTAATTTGAAATCCTAAA  
CACATTATTAATTGAGAAAAATAGGAAAAATAGAAATTGATTTTACGATACATTGTTTTTTTTATTAATAA  
CGTTACGCTTAGTGGTAAATTTTGTGACTTACACCAAGTCATATATATATATATAAAGAGAGAGAGAG  
AGAGATACGTAAAGTAACGGGAGTAGCACGTGACTTACGCAATCACATGGTTATTTGTCGTGCGTGATTTT  
TTATTATGGTAGGTATAGTTGTTTTGAGGGCGAGAGAAAGATTTGATATGACTGTGCTTTAAGGAAGTA  
TTTATTTAATGTGTACACAGACTGGCCCAATTCCAGAGTTAATCTCATATTTCAAAGGTTTAGGCTAATA  
TACCGAAACTTCATTGACGTGCAGATGGCAGTAAAAGGGAAAGATATTACGAACCGAAAAGTTCGTTTTT  
TAAACTTTTTGCTTATTATTACTTATTAATAATAGGGCCTAGTGGTTAGGGCGCTTAACCTATAATCATAC  
TCGCCCCCTTCAGCAGAGAGGGTATTAAATTGTGACAGTCAATTCACCATTTCATTGGTAAGAGAGTAGCC  
TAAGAGTTGACGGTGTGTAGTGTAGACTGGCTATATTCCTTTTTGTCTTACCCTGCTAAATTAGGAATGG  
CTAGTGCAGATAGCCTTCGTGTAGCTTCGCGCGAAATTGAAGACAAACCAAACGCTTAAAAGCGTATCA  
GAGTTTGTCTTGTGTTTATACCGTTAAAGCTTAAAAGTACCAGCGTTAATTAATTTTAAAGCTGTTT  
TTTTTTATAACAACTCGCAAAAAGAACCAAAGAAATATTTTCATAGTTGTTGATAATTTTACGACAGAG  
GGGGACACATAAGAAATAGGAAGGTATGGACTTGAGCTTATCCAATAACCACCTCCTTTGGAGGTATCAT  
AGTTAAATTAGTTAGTGTCTACCAAAGTGTCTCAGTGTCTTGTGTCACTTATATAGGAAATTATTACCAA  
TATAATGACTATTATAAATTAGGTGTTTTGTTTTTTTTTAGCAACTCAACTTCTCTGTTTCAGTTGAAAACCT  
AAAATTTCTTTTTCAAAAAATCTCGCGTCTGCGCTTAGGTACAACCTGATTTAAGATTCTTTGTAATTCA  
ACCAAACCAATTTACATGCTTGTAATTTACAGGCTCCATCAGTTTAAAGTTTTAATAGACTTAGCACTT  
ACTTCGATAACAGTCTCTATCGGTGCTCAATATCCTCTGTATACATATGCATACATACAAGTACACATT  
AAGAAAAGTGTTCCATGTATAAAAAACGTTATTCTCTGTGTAAAACCAGATGTATTGAGCGTTATTCT  
CTGTTTAATATTAGATGTATTCCACATTTATATGTGCGCCAAAAATTAATAATTTTGAAGCGTTACTG  
AAAGTCATTTCGTGTAGTTAGCTTACAGTCCCATAAGGTGAGATTGAACAGCGTTTCGAAGAACTTTAAA  
GAATCAATATTGTATAAATCGTTTCATCATGGAAATTAATCTGTTTAAATTCATCATATTTTTTATTTTA  
TTTTAACGTTTGAATATAATCGTTTAGAGGCGTTAGTCTATAAAAGGTGATTCTGCGGTAACATTTACC  
ATCGATTCCCTTGTAGATCGATGTATCGATATAAGAAGTTTAAACCACAGTATCTCCTAGATGTAAGCCCT  
CTATAGGATGTACGCACCGTGCTATTCTACCCTGTGTTTTACTCTCTGGGCTCTAAGTAACCGGTATCTT  
GCTTCTGCTAACGACAACAACGAGATTGCTGCGTTCCTAGCGGTCACAGTAAACCAATTTGTGGCGGTA  
AAACGAGAAGCTATCTCAATTTCTGGAACGGTAGGTGGGAACCTAACTAATTTTTGCCGCCACTTAACGA  
GCTTATTTTACCACCTCGTGATACCAATAACAATGCAGGGAAGTGAGAAAATGGAGAAGGTACCCAATGAA  
CACTTGCAATTCGTTTCAGCGTTAGGGACTAAGTGAATTACACGATTCTTGCGGATAGTTAGTTGTACATGA  
TGGTCAGTTCTGCTCCTCGACTGACACTTAAGTGTAGCTGCTACCTAATTCACAATAATAGGACCTGAA  
CTTCAGTACCTTGTCTTCTCGAATTTTGGTTGAAGCAAGGATAGACCGAAGCGTTTAAAGAGTTTTTGGTT  
CAATTGAGATGCTCGTAGAGATTGATTTGTTTGAAGTGTACAGACAGAAATTCATCGCGTTTTGAACGT  
AACATTTGCGTTTATAAATTTCTAGTGTGACAATGCGTCAATACAAAGTTTTTGTAACTGAGCTGCGC  
AATATCACAATGAGAAACATATAATGCTTACTTTTTGAGTCTTTTCAATATAAGGGACTCGAAAAAAAAGA

AGAAAAACAACAACATTATATTGTTGTTTGTGTTGAATTTTCGCGCAAAGCTAGCTACTCAAGGGTTTTCT  
GGGCTAGTCGTCCTAATTTAGCAGTGCAATACTAGAGGAAAGGCAGCTAGTCATCACCACCCACCGCCA  
ATTCTTGGGCTAATCTTTTACCAACGAATAATGGGATTGACCTTCACAATATAACGCCCTCACGGTTGAA  
AGGGCGAGCATGTTTTCGTGCGACGAGAATTCGAACTCGAGAGCTCTTCGATTACGAGTTGAACGCCTTA  
ACCCACCTGGCCATGCCGGGCCTGTTAAATTATTAATAAATTTTGAATTAATAAATTTAGGTCAGAAGTCGA  
TCATTTTAAAAAAAACCTAGAAAAGGCTGGTATTAATAAGACAATCAAGAAACGGGGAAGGTTGATCAG  
CTTTTCATTTCAATACAATATTTAATGTTTTTGTCTTTAATAAAGACAGGCTGAATCAATTGTCAGTCTTA  
AAAATATTTTCTTCCAGTACCTGAAAGCTACATGATTTTAATAATAGATAATGTTTAAACAGTTAAGGTGT  
TTTATTAGAAAAGCTGTTTGAATAGGTTGAAACGTGCTAGCTAAGGCAGAGTAGAATGGAAGGAAATGTTA  
TGGTTGTGAATATACTGACAAAACCATGTTCTTTCCGGAATTTATAGCGCGAAGTTTCACAATGGGCTTGA  
AAAGCTTTTGCCACTGAGGGTAATTGAATTTTAGCGTTGTAAGTTTAATTGATACTCATCTGTGAGACAG  
TGCATAATTTACTTTAAATAGCTTCGTTTTTGATATCAAACAATGCGTTTTATGTTTCGATTAAATAGTAC  
TGTAATTACGTTATAATTTCTACCAGAATAATGACGAAAGTCTACAATAACAATTAATAATAATAA  
TGATATTAACTATGAGCAACAACAAAAAAGGCTTCATTGGTCACTCGGTCATCAGTTAAACAATGATGC  
TGCTAACAGTGTTATTGGCTTTCACGTTGAAGTATATCGACCTTGAAAATGACTTATACACTTGGTATGT  
GTTGAACTAGAGGATTTTATGAGATTACACATTGAACATACCGGTGTATAGTATATTTAATTCATAGTT  
TCAACTAATAAATTAAGTGAAGTAAAAAATGCTTTATTACATTTTATCAACATCAAAAAGTATTTTT  
AAACATTTCTGTCAGACACACTTCTCATGTTTCTCTTCCCTGTCAAATTCCTTCTCGCTTTTACATTTGGT  
TTATAGTTATTTGATACTTATAGTGTCTCTCTTTACTGTGAGTTTTTCTCGCTTTTACATTTAGTTTAT  
ATTTACTAAATACTTCTAATGTCTCTTTTCACTCTTAGATTCTTCTAGTTTTTGCATTTGGTTTAAAGTT  
ATTAGATACTTCTAGTGTCTCTCTTCTCGTGTGAGATTCTTCTCGCTTTTACATTTGGTGTATAGTTATTAG  
ATACTTCGAGTGTCTCTTTTCACTATGAGTTTCTTCTGTCTTTGCATTTGGTTTATAGTTAAATAGATAA  
ATCTAGTGTCTTTTCTTATTGTGAGATTCTTTTCTCGCTTTTACATTTGGTTTATAGTTACTAGATACTTCC  
TATAATGTCTCTTTTCACTCTTAGATTATTCTAGTTTTTGCATTTGATTCAAAGTTATTAGATACTTCTA  
GTGTTCTCTTTACTGTGAGATTCTTTTCTCGCTTTTACATTTGGTTTATAATTAGTAGATACTTCTAATGTC  
TCTTTTCACTTTTACATTCTCCTAGTTTTTGCCTTTGGTTTACAGTTATTAGGTACTTCTAATGTCTCTC  
TTCACTTGAGTTTCTTCTAATTTTTACATTTGTTTTATAGTTATTAGATACTCCTAGTGTCTCTCTTGAC  
TGTCAGATTCTTCTCGCTTTTATATTTGGTTTATAGTTATTATAGATATATATTGTCTTTTTTCACTGTG  
AGATTCTTCTTGCAATTTGCATTTGTTTTATAGTTATTAGAAATATCTATTGTCTTTCTTCACTGTGAGAT  
TTTTCTTGCAATTTGCATTTGGTTTATAGTTATTAGATACTTTTATAGTGTCTCTCTTTACTGTGAGATTCTT  
CTTGCTTTTGCATTTGGTTTAAAGTTATTAGATTCTCTAATCTTTCTCTTTACTGTGAGATTCTTCTCG  
CTTTTATAGTTTGGTTTATAGTTATTAGATACTTCTAGTGTCTTTCTTCACTGTCAACCACTTCTGAGGTA  
GGTTTTTATTACTTTCAGATACTCCTGTTTCACTGTGTTATCAACGTTGGTAAAAGAGTAACCTAAGAAT  
TGGCGGTGAGTGGTGATGAGTAGCTACCTTTCCCTTAAGCTTACTTTGCTAAATTAGGGATGGCTAGCGC  
AGATAACCCCTCGTGTAACCTTTGCGCGAATTTCTGATACAGATACATAAATTATCAACGTCACATACTTCT  
GATGTAGTTTGTATCAATGCCAGATACTACTAGTTTATTATTTTAAACAGACATATTTGTAGTTAAAGGT  
TTGGTTTCTAATATGTGATACTTTTAATTCAGTTTGTACCAGTGTGAGATATTTACCTTCGCTAGATAT  
ACTTGTGTTTTTCCAACGACTTGTATAACTTTCAACTAATCCTTATTTTGTAAATTAAGTCGTTACTAC  
TGCCACATACTTCTATTAATTTTGTATTAACACTGTTAGACTTTTCTCGTTTACTTTTTATTTGTGTTT  
CCCACTGGAACAACGATAAGTCTACGATTTTCAAAGCTAAAATCAGAGTTGCGATTTCTGTGCGTGGATA  
CAGCAGATAGCCCGATACGGCTTTGTTATAAGCAAAAAACATACACTTTTATTTGTTGACTGTGTAATAA  
ATTATTGGTTTGTCTACCATTTGTTACATATCCATTACTCTCTGTGATGTCCGGTGTAAAGATATTCGGTTT  
GATTTATTATAGCGAGTGTGCTTCATATAGAAATAATACATAACGCTTTATAAATCCGTAGACTTACTAT  
GTCCACCTCTTCATAGTACCAGTTACTTGTGTAATTACTTAATTTATTATTATTGTCAAACATTATAGT  
CTTATGTTTGTGTTGATGTCACTGTAGTTTTACTTTTTTATTATTGTTGATATGTTTTCACTCTGAATTA  
CTTCTAATTTTACATGTGGCTTATTGTTACTGTGAGTTACTTCTAGTTTCATTTTGTGTTTGTGTTTAC  
TGTCATATCTTTGAATCTGATTTTCACTTCGTTTGTATTACTGTGAGTTACTTGTGTTTACGTTTAAATA  
CTCGCTTTTATATTTTCTGTTATCTATATATTTATAGAACTTGCTAGTTGTTTATTTCCCTCTTTATTCAT  
TAATAAATTAACCTGGTTTCTTTGTTGTGGATGCTTTACATTTTATTTTCTGTTATCTATATATTTATA

GAAC TTGCTAGTTCGTTATTCCCCTCTTTATTCATTAATAAAATTAAC TGGTTCCTTTGTTGTGGATGCT  
TTCCGCGACAATCCG CAGTGTGTAAAAACGTAAATCCTAAAGCAAAC TGA GTTCTGAAGATTGTTAGTTT  
TTCCAGTGACAATGTCAATATTTCCACTGCAGACTCAACGCCACTATGTAAATTCTCGTATAACAAAACG  
AAAGAAAAATTTTTTTGCAAGTTATAGGCTGGCTAAGCTTGAATGTGATAATGTGATTACGCTTAGATA  
TCTGATACTCCCTCAATAAAACGTGATAAAATTTGACTTTGCGATTAGTTTAGATCAAATTGCGGGTAAA  
TAATATTTGTTAGGAGTGGACAAAAGCTTTAGTGTGCGCACTCGTTTCAAAAAGTGAAAATCTGTACTG  
TTATCCGAATAAAATCCTGTTTCCGTTTATTATATAAAAGTGATTGTGTGGTAGGTACCGCAACTGTGACA  
TTTTCTGTGAAAAAACGGTCTATTGGTATTTGATTTTCAAAC TCAATCGGGTTCCTTTGTGCGCAAAA  
ACACGTGTTGCCATTTCGCAACCGTCTATAAAACTGTGGTTTCGATGCTATTGCTTTATTGGCGCCCTTA  
CTAAGGCAGGAAAA CATGAAAA CAGCCTTGGCAAATTACATTAGTTCTTAATGAAAAGCCGCGGGATGAA  
TCTGTGAATTCTGTTCTTGATTTTCTAAGTTCTAAAGTAATATAACAGCGTATATAAAAGTGTTCCTTGT  
CGACTGTCTGGCGTCTCGTATACTTTATATAAATTACATTTTTTAGAAGAAACAAACAAAACGCGCTGAGA  
CTTGATAAAGATTTTTGTTTCATCTGTTGTTGGAATATTAGAGTGACGTCACGTTGTCTGATTGGTTTGAT  
ATGAGTACGTTTTAAGGGCTCTTCTCAAGCCATACACGATCAGAAACTGAGGATGTACCGAATATCAGAA  
GGTATAAAATGCATATCATTGAAGGAATTTATATCTTTTCTCAAAGTCACAAAGAATTTTTTCA GTGTG  
TTCTTAAGCCTCGCATCATATGCATGTTATGTCTTATACTGGATCAGCGAAAAAGTTTCCATCTAACGAA  
GCTAAAGTTTGAAGTTTCGATTATCCGGCCCGGCATGACCAGGCGGTAAAGGCGCTCGCCTCCTAATCTAA  
GGGTCGCGGGTTTCGAATCCCCGTCAACCAAACGCCCTGAGGACGTGATAATGTTACGGTCAATCCCAT  
ATTATCAGTAAAAAGAGTAGCCCCAAGAGTTGGCAACAGGTGGTGATGGCTAGCTGCCTTCCCTTTAGTCT  
TACACTGCTAAATGAAGGATGGCTAACGCAGGTAGCCCTCGTGTAGCTTTACACATAATTCAAAAAGAAA  
TAAAAAAAACAATTATTTCACGGTTGACAAAGAACAGATAGCCCTTTGTGTAGCTTTGCGTTAAAAACAAA  
CATAAAAGCATAAATTTGGCTATTTTCGTGTGATAAAACATAGAGATCACGGACATGTGTTTTAGATGGGT  
TGTTTTTAAGTAATACAAAATGAATTATTACATTTT CAGAAGTTGTTCTTTAGTAATGAAACTGGAGGTAGA  
AAAATAAAGACGTGTGAACAAACTCGAGCACCATGTGAACTAGGAACAAGGAGTTGTGGCAGAAAAAATA  
GTGCTAATCGATAGAGGAATTTCTCGATAACCGCGGTACTTCAGGCAGAATTAGAGTAAATTAATCTCTAA  
CACTTTTTCTTAATTCCTATTTTTTATTGCTGTATTTTGTGCGCCAACAATACAAGTCGTGGGGCACGTG  
TATACTGGATCCAATTTTATTCTTCATCAGGATATCTACCAGGTATTCTCGAGATGAAATTTCTTAAAG  
CAATATTAGAGCAAAGTAATCTATGAAACTTTGGGCGTATTTAAACACATCAATCGAATGGGTTTCATCT  
CCTGATTCCAAAAC TGTAAATTAGATCTGAAATCGGTCCAGAGACGACGATGCTATGAGTTCAAAGTTCAT  
ACTTGAAAAACAAACAAAGACAAAGTAATATAAAGAGCCACTATGCCGCGACTAAAAATAGTGCGTTTTGT  
TGGCGCGCTTTTATAAACTTAATTTTCAATTGTTTAAAAAGATTTTTTACGAGAATCCAAC TCAATTATT  
CTTCTGCAAAATTACTTCTTCTCCAGAGAGGTAAAGTTTCTCGTCGATAAAATACATTCAGATTATCAGG  
GAAAGGCTTCCATTTTCATCGGTTTTCTTAGCTCATGTTTTGTATTGTTACTCGGGAAACTGAACTCCA  
CTTACAAACAATAACGAAAAGCTCAAACACATAAGCCTCCAGTTACCCCTAATCCCTCTCGAGAGGAACT  
TTTAAACGATCCAAAACGTCTTCAAAC TCCAGGAAATACAGTAAGATTTTTTCCAAGTCTATTTCGGTAAAC  
TTCAAACACGGCGCTGTGTTGTGATAAGAGGTATGAATTTAAGAAGGCAAAAAC TTGATCCTCCAACTGA  
TATTCTGTAGTGGTCTCAATCGGCTCGAGGAGGACTTCTAGTAGCAGAAGTTTTGGGTAAATTCTATTTA  
GCCTTGTGTTGGTGACAAGAACGAACTTTTGTATCGGTTGGAGTACCTTATTCAGCGTTGTGCGTCTCTAG  
CATGGCGACCAACGACGGCTTTGCTTCTAACAGTCCCACGTGAAATCCAGAATACTATAGAAGAATGCTT  
GTTAAGAAAAGATATTTCTTTACGGGGATCGCTTTGTTGAAGTCACCCGGGCAGGTTCTTCGGCTTTAGA  
GCGCATACACTGTGTTGCGATAAATGTATGGACTAGCATTAAAGCGCAGGTTGCAAAGACCTAAGGATGT  
AACAGTAGGCTTTGCTAAAGGCACGTGAAATAGCCGAACGACTATTGAATGTTCAACTATAGAGGGTGGG  
TACATTTTGCTAAAGGAGTTGAACAATAGACATTGAACGCCATGATACATTACAAGCCGGCTGACAACAC  
CAACATTACCTGTCTGTCGGATCCTCATTTTGTCAAAGAGACCACTGGTGGTGGTTTTGTGCTTCTTGCT  
ACCATTCGCTATGCCTCTTTAAACACGAGTCAATAGAGGTCACTACGTGTTCTTTCAACTCCCATACGGGA  
AAGCGAGACGATAGAATATTTAACCCCTCGATCGCAGGAGAGGCAAATTTGTCACTTTATTCAACTTAAC  
AACTGAACGAACATGAGACTGGATAGTTT CAGATT CAGAAGTAATAGACGACCATATATTAACACTGCTCA  
TTTTTCTTACAACCCTTTGTAAAAACACGCGGAAGTTATCCAAAGAAAATGGGGAACACGTTTATTACA  
AAACATTATTTGTGGAGAGATTTTGTGAAAACGTAAATAACAAACGCATAAACATTAAACAGAGAAATCCA

AAAACGTGGAATCCGAGTACAAAAATGATCGAAGTTTTTTGAGTAACTTTATTACTTTAATAAAATCTTA  
GTAAAAATAAAATGTTAAAAAATAACAACCTTTTACACTCCAGGCGTATATTTATATATATATTTTAACCA  
ACGTTTTACCTTTGCGTCTTTCTTGGGTAAATATTTACAACCTGTTTGATATTAGAATCGTCATTGAATTG  
CAAACTGTTGGTAATGTTCCAATTCGCAACTCTGCTGTAATATGAGTTAACAGTAGGAAAGTTATTATA  
CTATTTAATTACTGTTTCAATATTACAGCATAGTTATATACTAATATATTACATATATGACTATTTTATA  
ACATATAAGAATAAAGATAACTATATGCTTTGTGATTAGCTAAAAACATAAATCGAAAACAATAGCTACT  
CAGAAACAATAACAAGTGAAGCAAAGAATAAACAGTTTGTAAATAGTATTAACAATAAACTGTAAGGTT  
GTATGATACTCCAGAATACTCAAGTGTTAAGCTGAAAATAACAGCATACTGGTACGATGCGTTGTTTTAT  
GATTGGTGGTTTAGTTACATGTACCACCCATTGTCTCTGTTCACTCTTGGATTTTTTTTTTGTTTATGGGT  
ATAACTTCCATATATTTTCTGTCTTTAAAAATTTTTGGTTATTTGTAGAAAACAGCCAGATATTAACGAGG  
GAAACAAATATAAAGAAACGCAAAGTAAAAAACCTACTTATACAACAATTGAAACCAAAATTTAAATCAA  
TATAAAGGAATACTTTTATATCTATACTAATTATAACCTAACATCTAACTGTGACGCCCCCTACAATCTG  
CTACACGTTTATACTTTTCGTCTTTAAGACATGTATCCGACAACGGTCACTTGCAAACCTATTTTTCTTT  
ATCTGGAGATGACTTAGGAAGGTCGAAATGTTGTTCTCTCCTTATCCATAAGTATGAACACCCATACCAG  
CCGTTCTGAGATACAAAATTCAGATGGGTTTAAAGTTTTCTGTGTTTGGGGTACCTTTTTTACATAGGAT  
AAACTACGTTGTCTATCAAATCATTTGTAATATATGTATGAGAAACCGGACGACCTGTTCCACACGAGTAT  
CTCAGAACACAACAGTGTGTTATAAACAAATGATCAACACAAAACCGTTCCAGATGAACACAAGGTACCC  
TAAACACAGAAAACCTAACCCATTTAAACTTTATCTTAAAAACAACCATAAAATTTTAAAGAGATAAAAT  
ATGTGAAAGGTATACCCATTAACAAAAAATATCGAAAAATGAACAGAGATAATGAATAGGTGGTACATGT  
AACATATTATAGTCCACTATATTTGTATATGTCATAAAATAGTTACATATGTAATACGTTACTATATAGT  
TAGTATTATAACTGTGCTACAATATCAGAACAATAGTAAATAAATTACAATATTTTATACGTTGCTAGAC  
GCATGTTTTCGGCAGACTGGAGAAATAAAACATTACAACAGCTGTGTATATTAATCCTGAGGAGCCGTAA  
AGGCGAGCCGTTAGCTGAAATAATATATATACTTGTACATCTGAAGTGTAGGGGTCGTTTTCTCCCAATC  
GTTTTTACTGTTATTGTAATTGTAAAGACAACAACATTTTGATATAACGAAAACATAAGCGTTAAGGTT  
ACATATTCTAAATAAATCACCTTTTCAAGTATAGCCCCTCTCCCATGTTACAGCGGTAGGTATACGGACT  
TATACTGTTAGATGACCTGCGGTGGGCAGATCGTAGATAATCCATTGGTTATTTTTTGCTCAGTAACAAA  
CAACAACAATTTCAAATATTGTGTTTTTTATGAATAATTACATTCATTTTTTTTACTTATCATTTATGGT  
TTCGATTAATTTACTGACTGTTACTTCATTTTGCTTATAAGTAACGTGAACGAACGGAATGTTTTTCAAT  
AAAGAACCTTTTCATTAGAACCGAAGACCCAGCTAATACCGTATCCATTGTTATGCAAATTTACAAAAATA  
GGATTTTTCGTATTGGTTTTTACAATGTTTTTTCTTTTTTATTTCGGGAAAGAAAAACCATTGTTAATTCAA  
AAGAAGTCACTTCCGTGTTGCTTTAGAACCGCATTTTAATTGCAAATATCCCGCTGCACAATTCCTCAA  
AATTCAATATTTTCATCGGCCCTTCACTGTACTACGCAGCGTTAGCACGCGAGCTCGAGCGAGCAGAGGGA  
AGACTGCAAACGTTTCTAGACAGCTCAGTCAACAAAAGTGGAACCTGACTTATGAGCGAGTACTCATAC  
ATGGAGACATCTACCTCCGAGGGAAAAATTTGATCGTTGTATGAAATGCTAAGACTACTTTTATTTCTTTT  
GGGATACAGATCTCTTGGTTCTGTTACGACAATTACGTTATCACATCTGTTCTTTCTCTTCGTGTTTAC  
AGATACGGTACAATTAAATCTGTTTGACTAGTCAAGTCAATTTAATTATTTAATTTAGGTTACATA  
CATGCGCTTCCATTTATTTGAAGGTTTGTTTTAAACAAGCAGAAATCCGTTAACAGCAAGAAACGAAGTG  
TAGTTACTACTACAACGTGCCTTTGTGTGATTATAGTGAATTGCGTGATTAAACACGGTCTCTCACAT  
CGTTTGTTTTGACGAGTTTGAACCAAAATGAAATACGAACTGTGTCTTCGTTTGAAACAGGGAATAACTA  
TAGTCATGCATATGAATCTAATTATACATTAGCTAAGTTATTGAGATTATTGTGGTTTCAATTTATTTTCA  
AAATTTTGTGTTCTTTTATATGACTCTTCCCGACGATGGTTTATAATGCTATAAATCAGGTTTCGATCC  
CTGCAGTGGGCATGACATTTCTATAGCTTTACGTTTATCTGTAAAACAAACAAATAAACGTTCTTAATTCC  
AATCAAGTCACTTGTGACAGCAGTAAAGAAAAACATTTACCAGTGAATTAAATTGCCTGTCTTCCGTT  
TCGGTTTTTCTCATTATGTGCTTTTTGGCGTCATACTAATTCCTTTTTCTTTTATATTTTAAAGTAGTGGT  
GCATTTCTAGAGCACTGAAAGAGATGCAAAGACCCATTTGTTTGGTGCGTCAGGCGCAGACTCAGCATGG  
CCAGGTGGTTAAGGCGCTCGGCTTGTTATCTGAAGGTGGTTCAGGTTTGAATCCCGTCACACCAAAACA  
TGCTCGCCCTTTTAGCCGTGATGGTGTTATAATGTGCGGATCAATCCCACTATTTCATTAGTAAAAAGAGTA  
GCCCAAGAGTTGGCAACAGGTGGTGATGGCTAGCTGCCTTCCCTTTAATCTTACACTAATAAATTTATGGA  
GAGCTAACGCAGATGGACCTCGTGATAGCTTTGCGCGAAATTGAAAAACAAAACATCAGGCGTTTCCAAAA

TTTAACTGGATGCATTTGAACTAAATGCTAAAAACCTTGATGTGAAAAGATTTTAAAAGTTTAAACGCGAT  
GGAACATTATAATGTTTTGTACATTTAGTTTTCTACCTATTGGCACTTTAAGTGCAATAGTTATTATTTAA  
ATTAAATTGTATTGTATAATACTTGTCACTTATTTTCGTAACGAAAAAGGGAGAAGTTAAAGGATGATATA  
ATATTATCATATCACAGAATGTATGCTCCAGAAGCTATGTATTTAGTTTTACAAATCAGTTATTTTATTTG  
TTTGTTTTTTTCCAGTTTCCTCCATAAATCGTGTTTTACGAAATCTCGCTGCACAAAAGGAGCAACATG  
TACAAGCACAGGCACAAGATGCTGTCTATGATAAACTGCGCATGCTCAATGGACAAGGATGGCCTCGACC  
AAACCCCTTGGTATCCAGCAAGTGCTACGTTTGGGGGTCTAACTCCCGCTTGTGTCCCTCCTCCAGTTACT  
GTCCCCGGTCTGTCCACTGAGAACGGTCCAATTGAGAAAAAGGTAACACGTAGATTTATGTCCATTAGA  
TTAAATACACTTCACGACAATGACTACTTATAGTACGAATCGTTACCAGAATAATCCCTGAGCTTTACGACAGTGACTACTTATAG  
ACAGTGACTACTTATAATACGAATCGTTACCAGAATAATCCCTGAGCTTTACGACAGTGACTACTTATAG  
TACGAATCCTTACCAGAATGATTCTTGAACCTTTACGACAGTGATTACTTATAATACGGCACAGATAGCCC  
TCGAGTAGCTTTGTGCGAAATTCCAAAAAACAAACAATACTTATAATACGAATCGTAACCAGAATAATCC  
CTGAGCTTTACGGCAGTGACTACTTATAGTACGAATCGTTACCAGAATAATCCCTGAGCTTCACGGCAGT  
GACTACTTATAGTACGAATCGTTACCAGAATAATCCCTGAGCTTTACGACAGTGACCACCTTATTGTATGA  
ATCGTTACCAGAATAACCTTGAACCTACATACTCACATTATTATGACTTATATGTTAACTCAACATTTCGG  
GCCACTGTATGTTAAATCCCGTTTTAAGATTTCGGATGAAGATATCAATTCATAATTTCTAAGCAATTATA  
AAGTAGTATCGTCCGTCTTACTGGGCGGTTAAAACCAAGTAGTGAAGGGATTCCACAGTTAACACTTTGT  
AACAGTCTAAAATGAACATACCGCTAAAATCAGGGTTTAAACAACATAGGATGAAACAGTTTATTCACAA  
TAGCAACATTTACAAATAAATTCATATAGTTTTATAAACAAATACCCAATATCAATAAACCAATGTATAAA  
TGTTAATAAATCAATAATAATGAAACCGGGAAGTAAAACTCAATCCCCTCTCTAAAAAATACAGCACAT  
GCAATATTCAAAAATATACTTAAACATCGATAACAATACCGAGTGATTGCCACCTGACTCTCTCGTTCC  
TTTTAATGAAGTGCTGGCAGTGATTTTATTCACTGAGTAGGTACGAAAGTTCATCTCATGTATTTCATAA  
ATTTACATTGTCTTCTGCTACATTAATAGTATTTCTATGTACCGCTATCGAGGCTGGCGTCATTGTGCAT  
CATAAATGCATATTCATTAATAAATTTAAATCCTTATTTAGAAACGGTGTGTGTTTGTGTGTGTTTCGT  
ATAGCAAAGTCACATCGGGCTATCTGCTGAGTTTACCGTTTTAGAAAGGGAGTTAGAATTACAATGCAAT  
TAAAAGGTCAATAATGTACCAAACTATATGAGGAAATAATATTTGAACAATGAGTGTAATCCGGTTCGTC  
CACCTAGGGGAGTCGAACTCCTGACCTCATCAGTGTAATCCGAAGATTTACCTCTGTCTCACCAGGGGC  
TGTTTCGATCTATGAACGCAACCATAATAATAAACAAATATAACATGATATTTTTTTTTTACAACATATGAAG  
TAAACGTAAAAATATTTGTGAAAAATAATTGAGGTAAACGTAAATTACGTAACCAGTGATCGATGTAATGTA  
CAGTCATATGAAAAAGTTAGGACACCCCTATGAAAGCCTGCCTATTTTTTGAACATTTTTTGGATATATAGA  
TATTTTTATCTCAATTTTAAACAATACTGAGAGATTATAGGAATATAACTAAACAACCTAAGACTGAAGAAAA  
GACTTTTTCATGATCTTCTGTAAATGTAATTCATAAAAAATGTATATTCTAAGTGAAGAAAAAGTTAGGAC  
ACCTTACCTCTAATAGATAGTGTTACCAACTTTGGCTGAAATAACTGCATTGAGACGCTTCTTGTAGCC  
AGCTACCAGTCTCTGACATCGGTCTGAAGAAAGTTTGCCCACTCCTCAATGCAAACTCTTTTAGCTGT  
GAGATGTTTTGAGGGGTTTCTTGCATGCACAGCCTGTTTCAAGTTACTCCACAGCATCTCAATGGGATTAA  
GATCCAGACTTTGACTCGGCCATTTCAGAACTCGCCATTTCTTAGTTTTTCAGCCATTCCTTGGTGGATAT  
ACTGGTATGTTTTGGGTTATTGTGCGTGTGAGGGTCCAGGTCCGCTTCAGCTTTACTTTTCTTGCACTT  
GCAGATGGTCTCATATGATCCTCAAGTACTCTCTGATACACAGTATAATTATGGTGGATTCTATGACTG  
TGAGTTGTCCAGGTCTGCTGTCAGCAAAGCAGCCCCAAACCATGACACTTCACCTCCATTCTTCACAGT  
TGGTATGAGGTTCTTTTCTGGAATGCTGTATTTGGTTTTACGCCAAACATGTCTCTGTCTGGTGTCCA  
AATAATTCAGTTTTGGACTTATCTGTCCAAAGAACATTATTCAAAAAGTCTGATCTTTGTCTACATTCT  
GTCTAGCAAACCTCAGTCTGGTCTTGATGCTTCTCTTAGAGAGCAAAGGTTTCTCTTGCACACATCCC  
ATGCAAGTGAACTTGTGTAGTCTCTTTCTGATTGTAGAGGCATGCATTTTACATCAACGGTAGCTAGA  
GCCTGCTGTAGGTCTGTGATGACATGTTAGGGTGTGTTGGAGACCTCTTTTAGCATTTTGCGGTCTCGGG  
GTGAACCTTGCTTGGATGACCAGACCTGGGCATGTTGGCAGTTGTTTGGAAAGTCTCCACTTGTGACTA  
TATTTTCGGACAGTGAAAATGGCTGATTTCAAAATCTTTTGAATCTTTTGAATCCCTTACCAGACTCATA  
AGCTGCTACAATTTTCTTTCTAAAGGCCTCAGACAGCTCTTTTACTTTTACCATGGTGCTCACTCTCACT  
TCAACAGTTTGGAGCACACCAAACTAAATGTCTGAGGTTTAAATGGGGCAAGCTTCATTCAAAATGCTGA  
GTAACGATATTCTAATCATGTGCACCTGGTGTGATACACCTGTGTGTGAGTTGAGCCATTTTAAAGTGGGA

ATGAATGTGGGGGTGTCCTAACTTTTTCTCTCAGTTAGAATATGTATTTTTGTAGAATTACATTTACAGAA  
GACATTGAAAAGTCTTTTCTTCAGTTTCAATAGAGTAGTTATATTCCTATAATCAATATTTAAAAATATTG  
AGATTAAATATCTATATATCCAAGAATATTAATAAATATACAGGCTTTCATAGGGTGTCTTAACTTTTTTC  
ACATTACTGAAAATAGTGCTTGTTTGTAGATGTCCAATCTTTAGAAAGGGCATGATATATTGTGTTACAT  
TAAAATAAACGACTGAATCTTTAACTATTTATTGTAGTAAAATAAAATTTCACTGGTTAAACATTGAA  
AATCTCAAGTTCGGTCAAAAACTTTGGAATTTTTCTTTCTTTTTTCAATAACGCAGGACTGGCAAGTCT  
GACAAAGTGTTTTGTGAGTATAACGATACTGTGAGGACCAGTTAACACTGACTGTACAGATTATGCTTA  
CAGCGGGTTTTCATATAAGGATAGGCTTGATATGCTAACTAATAATGATGAAATTATTACTGAATACCATT  
TGTGATAACTTTTCAGACATCCTGTTTTGTGAAGAACTTTTGTGTTTCTGCCGCTAATGCAACTCCTGTA  
GCGCCGCCCTACTGGCACAGGGGCATGTCTGCAGACAGAAACCTCTAAAAACCGGGTTTTCGGTACCCGTGG  
TAGGCAGAGTAAAGATAGCCCATAGTGTAGCTTTGTGCTCAGTTCTAAGCGAACATACTCCTGTTGTTTT  
GTTCTTACGATCGGCAGTTTTTTTTGTACAACCATTTTTAGCCCTGACAGTGTGTTGATCCAAGGAACACG  
AGTTGGTGAAAATAAGTTACAATTCTGATAACAAGTACAGTTTGTGCGGTTCAGGGATCTCTTTGTC  
CGAAAGGAGCTAATGTAACCAAGTTTTTGGAAATGAGATAATGTAATAAAGACTATGGAAAGGAGTTATT  
GTGAAACAGACTTTGGAAACGAGCTATTGTACGACTCTTTGAATATGAGATAATATAACCCATTCTTTGG  
GGAGGGGAAGCTAATGTAATACAGACAACTCAGTGTAAAAGAAAACCTCAAGGAAAAGAAAAATGATACCT  
TTGAAACTCACTGTGATATAACTCATTAAAGCATTAATATAACCATGTTTCATGTTAAGAAATGGCACAAAGTG  
TATATGAATTACAAGGACTGCTATCTCTGTACCACGTTGGCTCTTCAGGAATCACGTAAACATTCCCCGC  
ATTATAGAAACCGTATATACACAAAACTTTTTTGTGTTGCTTGTAGTTAAGGACAAAAGTAAACAAAAAAC  
CATCAGTGGTGTGTTTGCCACCGTGGGCGTAGGAAGCCTGTTTTTATCGCATAAGTGTGCAGTTATTGCT  
GTGCCATTGGCGAGATTACATGTGTGGAAATCACATATAGATGTATATATGTGAAAGTACAACATTTTTTA  
TTTTGTTTGTTCGAGATTAAAGCATAAGACTATACAATGAGTTATATGTACTCTGCTTACCACGGGGATCAA  
AACCCGATTTCTAGCGTTATAAGCCTTCAGACTTTCCCTGTGCCACTGGGTGTGTGAATGTGGAGCAGG  
TGGAATATGAAAAGCTATTTTGACAGGTCAAAATGTATAAACGGTACGCAAATCATATATACGATGCA  
TTTCTGTTAAACAAGTATATTCTATATGATCATACTATTGTTTGGTGTGTTAGTTTACATAACACAGTG  
AACATATCACCAGTATTTCAAATATCAGTGAGTTAATTCTTAGCTCTCTACATACTGCCAAGTTACGG  
GTTAACATCTTCGATGTGTTTAAAAAATCTTCAACGGCCCTTCCATGAGCTAGTTTCGACCTGAGTGTG  
TTGCTTGTGTGTTTCAGGGCTGAATGTAGTGTTCTTATGTAAGCTGAAATGTCATCTAATTAGGTGCCGT  
ACAATGCATTGATTTGTTGACACTGACTTCTATGGAGATCTCATTGTTCCCTTTTACACCATGTCTCTGA  
GGATGTTACGCATATATATATATATATGTGTGTGTGTGTGTGTGTGTGTATGTGCGAACTTATGCATATGCA  
CGTGTCATATAATAACTTCCCTATGCATACAATGAACATAGATGTTTCATTTTTTTTTTACTCTAACGTGTA  
GTGGAACGATAGCTACCATGACTGTTAGAGTATTTATTTCAGATCCTAACTGATTTGCTTTCTTACGTGT  
AATTCATTGTTTAAAGAGCATTTTATTCCACCACGTTAGTCTTTAAATGATTGTATGTTGAAATAACAAAA  
GCTCCATATACACGTGGACGTGGATAATTAGTTTAAAATAAGTAACAATAGCAGATGCTTTAGCAGAGAG  
AATTGATACCAACTGATAATTTTTTGTGTTATTTTAAATTTGTTAAGGGAATTAATATTTTGTGAATATATA  
TGTTATAACAACGTTTCAATAGGATAAAAGCGTTGAATGTATACACATTTTACCCTAGTTCAAACGTTGT  
GGGATTTCTTTGTGTTCAAGCGCAAAATTACCTAACGTGTGGGCTATCTCTATTGTGCACACCACAGGTA  
TCGAAACCTGTTTTATAGTGTATAAGCCCTCTGAGCTACTGGTGAGAAGGCTACCTTACAGTGGAGTA  
TTGATCTACATTTTGAAACATGGAAGACGTGTATGGTGTGTTTAGTTTGTATGACGTCATAAGATATTC  
ACGTTTCATGAACATATTAGTGCGTGAACGTAAAGCTTTATAATTACATCAGATACGTTTTTGTAGGGAAG  
TATGAACTGATCACATAGTTCTATCAGGGCTCACGTAAGAATGTACTAAGACGTACAAATTATGTTACCT  
TATACCGTTCCAAAAATAAATAAAAACTTCCATCTATCATATCTACGCTATTTCTAGATTTACACGACTA  
ATGCTAATCTTGTAATCGAAATATTTTATTTGTTTGTGTTTGTGTTTAAATATCGCGCAGAGCTACGAAAGTG  
CTATCTGCGTTAGCCGTCCCTGATTTAGCAGTGTTAGACTAGAGAGAATGTAGCCTAGTCATCACCCTC  
ACCGCCAACTTTTGGACTCCTCTTTTACCAATGAATAGTGGGACTGACCGTCACATTATAATGTCCACAC  
GGCTGAAAGGTGAGTATGTTTTGTGTGATGGGGATTGGAATCCGCGATCCTCAGTTTACGAGTCGAACT  
CCTTAACCACCTGGCCATGCTGGGCCATTAATCGAAATATATCTAAATGCACTTAATTGTTTACAAAAAA  
TAAATTGTGAAATGCTTAATATATTTTACATGTACCTTTAGCAACTGGTACTATCCTAAGTAGATTATG  
TGAACGTGTGTATATATACTGAACAAAAATATAAACGCCCCATGTCAGACTTTTGAGTTTTTATTAACAT

TAGGGACATGCAATATATGAAATTAACCACAATTCATTTTGTATTGAATAATCTTCAAATCACTGTCCA  
TTACATCAAGATATTGGGATATGAACAGGACTGTCACTCCTTCAAATATGGTAGGGGCCAGGCTGAAGAA  
ATTCACTGTTTAGTATCTTGTGTGTCCACCATTGCTTCTGTGAGAGCAACACATCTCCTTCGCATGAAG  
TTCACCGGGTTGTCTATGGTGGCCTGTGGGATGTTATTCCATTTCGTGCTGGTGTGCCACACGCAGCTGAC  
ACACATTACCTGGAACCTGGAACACGATCCAGAACATCCCAAAGATGCTCTATGGGCGACATGTCTGGCCA  
ATACGCAGGCCAGTCCAGAACCTGGAATGTTCTCAGTTTCAAGGAACCTGGGTGCAGATCCTGGCAACATGT  
GGTCGGGCGTTGTCTGTTGGAAGGTGACATTATACTTCTAAGGCATTGCTGCTTTTGTCAAAATTTGAC  
ATTTTGGGGTGGCCTTTTATTGTCTCCAATATAAGGAGTGTACTGCTCCTTCTGTTTGATATGCCACACC  
CATGCACTCAGTGACATTAACGCATCACTGAGCAAATGCTCAAGGCAGTGGTAGACTCAAATTTGGGACA  
CTAATCAAGAGAAATATCCATTTTGTACAAGTAGAAGGAGTATACACTAATATAGGTGATACTCTTCAT  
GTGACACCAATATTTACATGGAACGTTTATATTTTTGTGTAGTATATATAATACTCTTATCAGAGACAG  
TGTAATATTCAATTATGCTTGGTTTATCAAGTTATCTCCTTTACCATAGGAGCGATTTTCTATATATTAAG  
CTATCAATACATTAAATATTGTTTTTTGTTTTGTTTTTAGAAACCTTCCCTACTAAAAATGAAAA  
TAAATGAGGTTATCATATCACTCTAAATAATTTAGCATGTTAAACGTTAAATCTAAGCAGTTTGACTTGC  
GAAATGTTAATAGAAGTAATTTAGTATATGAAATGCTATTCAACGTAACCTAGCTTGTGAAATGTTATTT  
TTAAGTAATTTAGCTAATGAGATGTTATTTTAACTGATTTAGTATGATAAATAATTTCTAATTAATTGA  
TAAATATATAGCATGTGAAATGTAATCCAAGTTATTTGACCTGTGATATATTGTTCTAAGTAATTTAGCT  
TGTGAAATGTTATTTCTATATAATTTAAGTTGTGACGCACTTAGTAAGTAATTTAGCCTTTTACATATTAT  
TCTAAATGATTTAGCTTGATTTATCACCGTAAAAGAGTCTACATCTAGCTATAAAAGTGCAAAATATGGC  
GCGTGATAGATGCTAAAAATACATGTATTTAAGCTACAAGCTAAAACAAGACAGGTCTCGCAAATTTCTCGT  
TACAGAAAAACGAGATAAAACGTTAAATGGAGCTGAAAATTTGATAACGAAAGACCATGATCCAGATGGC  
AGGCGAACCCTATTTGAAAAGAGTATGTACTTTGATGCAACTTTAAAAAAAACCCAGCAATTTCTTTTAA  
TGTTGTCGTAAGAATGAGTCAAGTGGAACACAGATAACTGGTTACTTATTTCTGTTAATGAGGCAGTTAG  
ATGTGTGGTATGAAAAGTATGTTGAAAAGAAAATGTATTTTAAAGCAGTGTATTGTGGCCTGAAACATAGG  
TCTGTATGTGGTATCTGCTTCACTTACAGAGAGAGGAACGCTCCTTTGTACTCCATCTTCGAAAGGTTTT  
TATTGTGATTTTGTGTAGTTTATAAGACACATTCTGAACCTTTATTAGTCGATAATAGTTATTTTATCAAA  
CTAATTTGTGTTGTTTTTAAATCTTTATTTTAAATTTGACCTAGTTGTTAAATTTTCCAATTTCTGTGAA  
TAAAAAATAAATAATCAAAACACTGTGGTTTATAAGTAATCAAGTTCTGTTTTGTAGCGTGCGTTTAGTAA  
AGATTGCATAATTTAATTGAGTTGTTTGTCTGTGAAAACTTTTCAATTTATCATCTTTACTCTATTTCTGGA  
TTTACACGACCGATGCTAATCTTGTAATCGAAATATTTTTATTTGTTTATTTGGTTTTAATTTTCGCGCAA  
GCTACACGAGGGCTATCTGCGCTAGTCATCCATAATTTAGGGGTTTAAAGACTAGAGGGAAGGTAAGTACTAGT  
CATCACTATTCACTACTAATCTTGGAACTACTCATTTATAAATCAATGAATAGTGGGATAGTCTCTAAC  
ATTATAACACCCCCGAGCTGAGAAGACAACCATATTTTAGTGTAACGGAGATTTCGAACCTGTAACCTCA  
GACTACGAGTCGAGCATCCTAACCACATGGCCAATTTAATTAATAAATAATTTTGTCAACGTTATATAACCT  
TATGGTTACACAGTACTATATACCCATACTCTGGTGTGGAAGATGAGAGAGATAGGTAATACTTCTCTTC  
GTTTTATATAAATTGGCGTTTGTGTAATATTAATACAGAAGTCATAACGAAATACTTAAAACCAACAATAT  
TTAAATTTCAACTAAACTATTCACTTTTCCATCTTTTAAAATTATAAACTCTCATTTAGGGTGCATCATTT  
TCTTTTTATAAAATCGTCATTTGATCAAAGTTTCGCTACCCGAGAAAGTATACATGTATCGAATATTCATG  
TTTATTTGAAGTTAATTTAAATGAACATTGGCATTGGCACAGTGGTAATCTATCATTTAAATTTAAAGTAC  
GATCGTTACAACTATCTGAGCTGACATAAAGGTACAATAAAAAATGTTGAAAAAAGTGTGAAATGAAAA  
TATTTTATTTGTTTTATTTGTTCTGTTTCTATCAGGAAACAGAAGCGAGTTTCATGTTTTTAAGTTTGTT  
TTTCAAATCATACGAATTTGTTTCTAGACTTATTTACCTCATTCTAATTGTTGTACTCAGAATTTTCGC  
ATAGAATAATTTCTTCGTTCTAGTAGGTTTCTCAGCCTTCGAATTAATTGGCAGGCAAAATTAATGTTCT  
TAATTTATAACCAAGACAGTAATGACATTTTGAAAGTTGTTAACGGGTATTTAATTATACAAACCTTTT  
TGGAACCTATTTTATCAAAGCTAATCTCTTGATAAAGGTATATAGGTATTTGGCAAAGTGGTCAGGGTGT  
TCAACTCGCAACTTTTGGGTACGAATCCCGTTACACCAAACACACTCGCTTTTTTATCTGTGGGCAGTT  
ATAAAGTAACGGTCAATTACACTATTCAATTTTCAACGAGTAGTTCACATGAGGTGGCGGTGAGTGTGAT  
GACCAGTTGCCTTCTCTGAAGCTCATCACTGCTAAATTTGTAATGGCTAACGTAGATTCTCTTGAGTAG  
CTTTGCGCAAAATTTAAAGCACACCAGAATACACCATATTGATATCTAGGTAATTAACAGGATATTT



ACTACAACATTATCATCAATGCTTACGAACCGGATAAAGAAGTTACATCCAAATAAATGCAAAATTTCCG  
TTCATTGTAATTTTGGTATTTTGGTGTTTTAAATTTTTCGCGAAAGCTTCTCGAGAGCAATCTACGCTAGC  
CATCTTGACACATTCGGATTATTTGCGAAGACGAAATTATTTTATGCTGTTTTCGACTTCTCTCTCGCG  
CGCATGTATTTATGCCATCATTCTTCACGTAATTGTTAGGCTTAAAAGCATGCTAATGTTGAAAAGTACA  
TCCAGTATTTGTTATGACAACTGTTTCTAGGACATCCAGTTAAATAAGCGGTTTTTAATGCGTTTAGGAAC  
TGACTGCAGCAAAAACTTAGATTTCAAATCTGATTTTTCTGCACACCTGTACCCAATTTCTGGACATGCC  
AGGGATTTAGTGTCAAAATTGATAGTGTCACTCTCTTATCACCACACTTTGCGGTGTCTTTGCTCAACCGT  
CACGCGCTGTACCCAGAATATGTCAAACCTGGTGACCCCAAAGTTGGAGTCTTCACAGCGGCACCACTCA  
CAGAGAGATGGAAGCCTCTGGGTGGGCCGAGTCTCTTGAATTTTTAAGACTTAAACCATTGCGTTCTTTA  
GACCCGAACCCAGCACAGAATAACCTCAAACGACAGTTTCATTTTTATTTTCCTGTAAATGTCTCTTTTG  
TTTGGAATCAAAGGAAGAAAACTAAAGCAAGTGACAGAATTCCTATAGTCAACCACGGATTAAAAAACAA  
TGATGAAAATCACCAGGTGTCCAGATGTGAGGGTGAGATGGAGAGAAGAAGAGGGGGTTAGGAAGGTATA  
ACTGACACATGAATGTTTCTTCTTCTATTTGTACGTATCAAAATTTTCTCACGGTGAACTCGATCAAATTC  
AGAAGTTTCTGTGCTGACCTGGCAAAAAAGACGTGTGTACGAGAGTTCTTTATCTGAAGATATTACTTTC  
CGTAATTACAAAACATTGAAAAAAAAGTCCGTACAATAACGTAAAAATGCAGTTTAACTGTAAAAAAAAG  
AACACAAGAAGAAAAAACACGGAATGTAAACGAGGAAATTAACAGGTGTTTCTGATTTTATTATATTTG  
TGTTTTTTTTCTTCTGAATTTAAGTGAAAATTAATGCATTTATGAGCAGCTGTCACTGAAAAGATGCGTT  
ATCCTATTTACACGTTGGTAGAAAAGAGTAGTCCAAAAGTTGGTGTTGATTGGTTAGTTTCTTCTAATTT  
ATCACCAGGGTAGATGGCCTTCGAATAATTTTCATGCGAAATTTCTGCAATTAACTTTATGGAAATCTTCGA  
CAATTGAATTGGCATGGATAAAATTTGATGATTTCAAGTTCATTTACGTTAAGATGTCTTGTTTGTGTTG  
TTTTGGAATTTTCGCACATTGCAACTCGAGGGCTATCTGTGCTAGCTGTCCCTAATTTAGCAGTGTAAGAC  
TAGAGGGAAGGCAGCTAGTCATCACCACCCACCGCCAACCTCTTGGGCTACTCTTTTACTCACGAAAAGTG  
GGATTGATCGTACCATTATAACGCCCCACGGCTGGGAGGACGAGCATGTTTGTGCGGAGTCGGGCGCGA  
ACCCGCGACCATCAGATTACGAAGCGCACGCCTTAACGCGCTAGGCCATGCCAGGCAAGATGTCTTAGCG  
TCAGAGATTTTACTAAACAATATTTTTTCGCGTATTTCGCGACTGTGAATATTATTTGTGTTTCACTGAA  
TTACTTGTGTTGTTGTTGTTTTTGTACTTATAATAATAAGTTAAATCTAGAAATATAATAGTAATCGAAA  
GCAGATTTCTAGATTCGTTCTGCGATAGATATTACGAGACCTTTTTTCTATAAAGCGTGTAATTTCCAC  
GCGTTTGTGTTTATAAGGAAACATCTGAGACATCGTGTGAGATATGTACTCCAACTGAGGAAAAGTAATTG  
TCGTTGCTCTTCAAACATTCTAGGCGACATTTAAAGCCATAAGTATAGTAGTTACTAGGTCTCAGTCTT  
CAGGCAATCATCCATCTTGTGCTAACTCAGTGTTCCATTTGCTGGGCTTACTATCCTATCCCTTGCCCTT  
ATTGATCACTCTCCACCAATAGAAAGTTAGAAGGAGGAGCATGATGATGTAATCTGGCTGCACCTACT  
GGATTGATAAAACCAGCATATAGAGAGGAACATGCTTTAAAAAATGGTTTGATTACGATGTTGAGAAA  
TTTCTGTAAATGTGAGAAAATAGAAGCAAAAGCCTTGTTTATAGCTAAATATATATCATACAGACAAACA  
CGATAAAACATCCAAAGTTTCGGAACATAAAATTTGACAAATATACGGATGTTTTGTAGTGCCATCTGT  
TGTTTGATTTAGAAAATCGTTTTAATTTGCAAGGAATTTTACAACCGTTCATTCATTTACACTCACTTAT  
ATTTATGAATGTAAAAATAATAGAACAAAAACATTTAAATCCAGTATAATTTATTAACCTCAAGAATTTCT  
GACTTTTCTCACATTACTTACTATAGTTAAATATAATCGCATTTTTTATTGGCTTACTTACAGATGCGTC  
GTTTAATTACCTTTACGTTATTTACCATAGAAAAAACAAATGTGAGCCTGCACCAAGACCTAGTCATAT  
TCACTTGCAATTACTCTAGGCTAAGCGACTGTAATCAATAAATCGTTAATACGTCAGCTGATATTTTGAT  
GAGGTTCAATTTATCCAACTGATTTCAAGTTAGCTCCAGCTGGATATTTGGATCAGTTTCATTTATCCAAG  
TGATTTCAAGTTAGCTCCATCTAGATGTTTTGATTATCTGTATTGGTCCAACCTGATTTCAAGTTAGCTAC  
ATCTAGATGTTTTGATTATCTGTATTGGTCCAACCTGATTTCAAATTAGCTCCATCCGATATTTTTAAGA  
TTTCAGTGAAACGTATTATAACTAATAACATTTGTAAGCCCTTCAGTTGATATCCCTCAGCGATAATTCT  
GAGAGCTTGTAACCTAATAATCGAATTTCAATACCTGTGGTGGACATTGAGAAGATAGCCTACTGTGGA  
ACTATGTGATCACCATAAAACAATTAACCATTTATTTATGAATATTCAACCGACATTCAAAGTCACTGC  
ATATCTTTAATCGCAAGATCTGACGGTCAGTCAGCAAGTGAAAAGTGATTGCATTGAATACAATAATATT  
TAAAATGGATATCAACTGTGAGTGAAGTAACACACTGACTACTGTAATCAGAGATTGGCGCAGTGATTT  
ATTCATGAGAGACATTTTCTAATTTGACATTTAATGGTATATATTACAATTTATAAAGTCACATTTCTTT  
CATTTCACTTTTAGTTAATAAATACAGATAATATTAGATTTCACACTTAATTTTGCTTTAAGTGTCTTCA

AAAAC TGATTTTTCATATTAACAACGAGCATAAACCTTTGTATTAATAAAAAATCGTGAATATTTTAAT  
TTTTTATTATTTTATACGACAATACAATTGATTTACGCTTCGCAACATTGAGTTTTTTCATGAATACTG  
CAATCAGCAATTGGCGTAGTGATTTTTTCGTGAAAAAACAAACCTTTTCGGCAATTCCTCAATCAAGGA  
GCGACTGCGCTGTAGTGAATGAATACATTTAGATTTTCCATTGCTATTATTAATATTAGCAAACGACGG  
ATAATATAGATAGTTAAATCGTTCTGAAGATTAAGCGAGGAGAAACATTATTTTAGATATTATGTTTTGT  
GTGTTGTTAAGCGCGAAGCTACACAACGTGCTATTTGTACTGTGCCATAACTGGTGTGGTAAACCAGT  
TTTCAGCGTTATAAGACTTCAGACTAACCTCTAACCCAATTAAAGTGTGTGTGTTTGTGGGAGAAGCGTA  
TGCATTTATTTTTAAACGAAGGAAACATTTCAAGTGGAGCCAGTTTAGAAATATATTGTTGATATAGCTT  
GTGACTTTTGAACTTTGTAGGTCAAATACGAATAGCTCATTCAAATCGTGT'TTTTGTAGGGATTGTTTG  
CTTAGACTAAAACTGGTTAAGCTGCGATCCAGCTGGAATCTGGTGCTATCTAATGTCAGATTATACATGT  
ATTGTGTTCCAGATTCCGGTGCTTAGTGAAC'TTTAATTCCTGGCAGGTTTTTAATCTATTATTTCTAAAAA  
CAATTTTTTTTTTAGTTTTTATATAATTTATTGTAATCTGATTCCGCACTTCGTTGTTTTACTTCTTATATG  
AGAGTAAACGAGAAACAAAAACACACCAAAAGAACAAGAATTTTCGAGTTGAAAGTGGAAGCAAATTTA  
TTAAGGGTCTTGTACATAGATTAGGTTTTATTTTCTTATTTTTTGT'TTTGTTTTAATCTCTCTGTA  
ATATCGTGCAAGGAGATTCGTCA'TTTAGAGAAACCGTTCTGAGCTGGGTGTTTCGCTATAATAAAACCTGAT  
AATGTCAGTCC'TTAATGGAATTTATGAAAAACGACATTAGCACTTTAACAAGGCCTCGCAGTTGTACATC  
AACTAGTTAGTAGGAGGGCGTGAGACAGCGCACGTAATGGTCTTCATAAATTTAAACAATGTCGCAAACT  
GTCAAAC TAGCGACCAGTG TAGACCTATATCAGACTAGTTTGCTGAGGACAAGGCAAGCTCATAGGATA  
TTTAAGAAACTGATGATCATATAAGCTATATCTACTCGTGACATTTCTTGGTATTTCTTGCCAATGATA  
ACGTTAAATACCATAACAGATACGTACGTAGTATGAATGGAAATGCAACGGAAAAATGACAACAGCAAAAG  
TAATAATGACATGGCGTTTTTGATAAATGGGTTCTATCTTCCCTTACCGTTCTGCAAAACCGTGAATATCA  
GTATGTAAACTGGGAAGATTAGGCAACTTTCCAAGTTGAAGGCCAGTCC'TTAGCTTTTTCTTGTCACATTT  
AGGTGCTGAAAGCTTTTGATGTGGTGACATTAATTTGATGAATTTTGCAAGCTGAACAGATATATCAA  
CTTATTCAGCCTAAATTAGAGAGCTGGATTTGAAAGGTATGATAATGAAATGATCAGTTATTGTACTTTA  
AAGACGATTTTCAAAAAGGCGGCTAAGCTTAACGACAGTTCTAGCTATGAAACATTTCTCTCATAGTAACG  
CTTTTAGTTGCTAACACAATGTGATTTTTTATACGACATTGCTATTCTTTTTTATTTTCGCTACGTGGCAG  
TTCACAATCGCTAACTTGTTTTTGAATTTTCGCACAAAGCTACTCCACCCACCGCCAACCTCTGGGCTAAT  
CTTACCAACGAATAGTGGGATTGACCGTCACATAATAACGCCCCACGGCTGAAAGGGCGAGCATGTTTG  
GCGCGACTCGGGCGGAACCCGCGACCATCAGATTACGAAGCGCACGCCTTAACGCGCTAGGCCATGCCG  
GGCCTTCAATCGCTAACTCATTTCTAAAAATAAATAATTAACACGACATACTGGATAAAAAAATTTAACCT  
CATTTACGACATAATAGCATAGGTAACTAACTCTACGGAAGGTTAGGCGTGGCCAGGTGGTTAAGGCACT  
CGACTCGAAATTTGAGGGTTGCAGGTTGCAATCCCCATACAACCAAATGTGCTTGCCAATTTAGCCGTG  
TAGGCGTTATAATGTACGGTTAATCCCACTATTGTTGGTAAAAGAAAAGCCCAAAGTTGGTGGTGGG  
TGGTGGATGACTAGCTATACTCTCTAGTCTTACACTGCTAAATTAGGGACGGCTGGCGCAGATAGTCC  
TAGTGTAGCTTTGCGCGAAATCCAAATCAAACAACTCTACGGAATATATATCATGGTAGTTTTTGTG  
CTCAGAACCTTTTCGCTCTTAAAGCAAATAATCTTACGTCAAACACGATTAAGTATTCAGTTAATAACGAA  
CTTTCATTAACCTCTCTAATTAACGTTTTTAAACGTATCCGTGAACAGACACATACAAGAATTCATGATG  
CTATGAGTTTTTCGTAAATATTTTAAAAATATCTATCACAGGCTAATACATAAATAATATTTAAACCCAC  
TTGTAGCTATATTTAATTAATGCTAAATTCAGTCAGTGGAAGCTTGGGAGAGATTAAAAATCGATACGGA  
TTAAAGTTTAAACTCGATAAATCAAGTACATATCTGTATTTAAATAAGAAAACCTTATCACTGGAATA  
AATTTATTATATTAAGATGGTTTGT'TAGTACGGCAGTAAATAATTTTTCTTGTAAGCCATATCCTATACA  
GGACTGTCAAAGACGACCTACAAAACCAATCAATATAACGAAACTGCTATTTAGAGCTAACGTATCCCTT  
CTCGACCCACAGTCAATGGCTCCTTCAGATGTATGGAAGACAGCAGAAAAAATGATGGTTTAAATGGACT  
TCAGAGACATTGATTCTTGGGGTGCCGTTTGT'TGGCACCTCGCCCCGCTAGTTGATTCTTCAAGTGAC  
TGAGAAAACATTTTTAGATAAAAGCCCTTTCATGGATGACTCCTGAATAAGAGTGGCCAGTGTTTTCTCA  
GACAGTTTCTACAACTAGTATAAACTACACCTAAATTTACAGGCTGCTACAATCTCTAAGTCCCTTGAGT  
CACTTGATCTAACCAACCATTATTAAGACAAGGTTGAACGTCCGTAATAACTTATCACTGAGGATTTCAA  
AACATTGTATACCACACAACCAAGTTGATGATTGATTCTATTATCCACTTTTGAAAATTCCAAGATAATA  
TTTCTCTGACACTTCACTTTTAAACAGCGTATCTAACGGTAAGCAGAATTTACTTAAAAATAGTGTGATGT

TAATAAGCCCAATCTCTTTAAATTAGGTTTGATATTCAAATTTTGCATCTCCACTTTGTTTAAACATTTG  
CTTTAATACAAAGCGTGTTACATTTGAGAGGGACTGATGTATAGATCATTTAAACATGTGTCTTTATGTT  
TATCTAACTAATCCTAGGTCGCTGAGCCAATTTTAACCAAACCTCTGTAGGCTGATAGTTTAAAAAGGGGG  
TCAATAATCCTCTTAATTTCCAATGATTACTGTGATTAGACATCTATTACTTTTCACGTATGTTAACGTT  
AATTACATATATAGATGGCGTCACGTCATTTGAAAAAATATTAAATTATTTATAACACAACATATACAAA  
GTGGCGTTGTTAAGCACACAAATGTCATATACATAAAGAAAGCACTCTCTGTGGAAGATCGCAATAAAAA  
ATGGTCGCCATTTTACAGTAATACATAAACTAAGCAGAAGTTTCAACTCAAATGCCACCATAAGACTCA  
CATGAAGACTCACATGAAGACTCGTTTCTGAGTTTTACCAACTTTTTACTTTAAGCTTTGACCTTTCAAC  
TTTGTCTCTAAGGCACCTATGCAGCCAATAATCGTCAATTAATTAATGATGTGAAAACTTTGGAAGGA  
CGTAAGAGCTGATTACTGAAGGCGAGTAACAGAAAGCATCCCCTACTGCCACTCATATTTGCTATCTCT  
TCTTACAATGTTACCCTCACCATCGCATAGTAGTGATACAATGTTATAAGTTGGTTGGTTGGTTGGTG  
TTTTATGGCACAAAGTAGCTAGACTATCTGCGCCATAGTTTTAATTAGATACATAGAGTGTGTGTGTTTT  
TATAGCAAAGCCACATCAGGCTATCTGCTGAGCCCACCGAGGGGAATCGAGCCCCTGATTTTAGCGTTGT  
AAATTCGTAGACTTACCGCTGTATTAGCAGGGGGCTGATACATAGAGAGATCTTAAAGTTCAACAAAAC  
TTTTGGCAAGGTATTAACGAATGCTTTAATAATATGTTTACACTAAAATAAATCGTGTTTTAAAGTTCATT  
AGCCGAACAAAGAACGGATATCTCAACTTATAGAAAATAAAGGAAGACATGGCATCTGAACCAATGTAAA  
AATAATTCAGTTATTACACGATATTCGACACTAATTAAAAACAAGCTGCATTTATAACAATACTTGTGAA  
CCTATTGAATTAGCTATTTTCAATACCAGTAAAAGTTTTAGTAAAATGGTCTGTACATAGCTTGCTTTAA  
ACAAAACGTTGAAAGTATAAATATATATCGCAACGTTTACTTAGCTATAGTCACAAACACTACTTAACAC  
TGGAGTGAAATATATTATATACATATTCAGGTTTTAAGTACACTCACAATCAGTACTTCACGTTGTACTA  
CAATCACGTATATTGTATATATTTTTCTGTGCCTTAGCCATAGCCACACTCAGTACTTAACACTAGAATGA  
TGTATAATGTATAGTTTTTTCAGGTCTTAGCTACAGTGACGGTACTTAACACTAGAATCACGTGTTATATA  
TATATACACTTTTAGGTTTTAATTACAGTCACGATCAGTGTCTGAGGTAACCTCTCGCTAAACGAGAAACG  
TATATTAATTAATGTAAATAAACAATATTTATGTCAAATACATTATATCTTTTATAAGCAGTGACGAAGA  
GGCCTTATTTCTTTTGGGCCCGGTATGACCGGGTAATTAGAACGCTCGGACCACAATCCAAGCGTCGCAG  
ATTCGAATCCCCATCACACCCAACCTCCTTGCCCTTTTAGTCGTGGGAGCGTTATAATGTTTGGCCAATC  
CCACTATTCGTTGTTAGAAGAGTAGTCCAAGAGTTGTGCGTGGGGGTGATGACTAGCTGACTTTTCTCT  
GATCTTACACTGTTAAATTAGGGACGGCTAGCGCAAATAGCTCTCGTGTAACTTTGCGTAAAATTCAAAA  
CGAACACGTCTGTTTTTATCAGTATCGACACTCTTCAGTGACTTGAACCTGACTGGTTAGCCAAGCAGCG  
TCATCTCGTGCCCTGTAGTCGAAATATTTATTATTTATAATTTTTTACAATCTATTTATTATATTTTCTAT  
CTAGAAAAAGTTTTATTTTTTTTCGTTGGCGTAATCCTTGTGAGAAAAACCTTAGGTATATTCTGAAAAA  
ACAACAACTTTCATATATTCGTAGAATTGTTTTTCATATTAAATCTCACGAGAACCTCATGCTTGTCTC  
GCGGTTACATCTACATTATTTAGTTTTAAAGTACAAATAGCGATTGTTTGTGTAAGCGACAGTTAAATC  
ATTATAACAAAGTTTATCCCAACCCTGGCATTACAGTGCTAGAAAATGAAAATGAAAACATAAAACATCA  
TTGTTTTTTTGATAGAATAGTTAATTGACTTAAAAAGTACTAAGAAAACCTGCTATCTTTAAACATGTTTTCA  
AGCAAAGCATCTCACTGTAATGTGTTTTTGTGTTAACACCAGAGGGCGATAGTGGAAACAGAAAGCTCCAG  
CCGAAGTGACCTTGCGCGAAGCGGTGATGATGAAGAAAATGCAGCAAGATTACGCTCTGAAGAGAAAACTA  
CAAAGAAACCGGACCTCTTTCACTCCAGAAACAAATAGAAGCGTTAGAAAAAGGCATGTAACCTAACTATGA  
AATCAATGGAAGTTCAGCTCATAAAAAATAGTGGCGTCTTTGAAACTCGATTATGTATTGTTGAATCTGTA  
AAGAAAATTAAACGTCAAAGAAGGAAAAATTGTACTACGTTAAGTAACCTCTAAAATTCGGTGATACTCCT  
TTAATTTAACGATATAAATACGTGTGAAAAATAATTTTTTAAAGATTTCTGTTACAAAGTCTACTGTGTGAC  
GTATCTTACTTCTAACTTACAAGATAATTATATAATGGAGTTCTTAACTCGTGCACTTCTGCAGTATTA  
TTTTTAATAATGGATCGAACATCAATTTCTGTTTTTACTCTTTTCAGAATTCGAACGAACCTCATTACCCAG  
ACGTTTTTTCGCCCGTGAACGATTAGCATCAAAGATAGATTTACCAGAGGCTAGAATACAGTAAACAGCTT  
AAGTTGTTTTTTTATTAAGCATATGAGTAAATACACTTAATGAGTCTGTGGCTGAGAAATAAGAGAATTAA  
ACATGTACTGAAATATTAGAATATTTGAAAAATGACACAACCTTTATGAATTCCTGTTTCTTGCAAAACG  
TTTAATATTATTGGTGACGATCGTTTGGTTGTTTACATTGAAGCTCAAAGCTACACAATAGGCTGTATGT  
ACTCTGCTCTCAAGAGGTATAAAAAACCGTATTCTAGCGATTTATAATAGTTACGGAGACTTCAGATATT  
ACAATAAAAAACACATCAGCCACGTCGATTTTTTTTTTTTTTAAATTTTCGCACAAAGCTACTCGAGGGCTATCT

GTGCTAGCCGTCCCTAATTTAGCAGTTTAAGACTAGAGGGAAGGCAGCTAGTCATCACCATCCACCGCCA  
ACTCTTGGGATACTCTTTTACCAACGAATAGTGAGATTGACCGTAACATTATAACGCCCCACGGCTGGG  
AGGGCGAGCTTGCTTGGCGCGACGCGGGCGCGAACCCGTGACCCTCGGATTACGAGTCGCGCGCCTTACG  
CGCTTGCCCATGCCGGGCCACAGCCACGTCGAAAAGAGAAATTTTAATTAAAATAACATATATTTTAA  
TCCCTGTAAATACGTTTGAAGCAGATGGATCGAATCGATTTTTTTTTAAATAAAAATTACTATACACAA  
TAATCATAAGTAAGACCTGGTCTCAAAAACACAACAAAGATCGGCCCGGCATGGCCAGGTGGTTAAGGAA  
CTCGACTCGTGATCTGAGGGTCGCATGTTTCAATTCCCGTCGCACCAACATGCTCGCCATTTTCACTGT  
GGGGGCGTTATAATGTGACGGTAAAAACAGCTATTTCGTTGGTAAAAGAGTAGCCCAAGCGTTGGCGGTGGG  
TGGTAATGACTAGCTGCCTTCCCTCTAGTCTTACACTGCTAAATTAGGAACGGCTAGCGCGGATGACCCT  
CGTGTAGCTTTCCGCGAAAATTCCAAAAACAAAACAGCCTTTTTTACTGTGTACAATAACTTTTTTC  
GATATCTTATTGTATTTTTTAAATTAAGAGCCATCATATCTTTATGATTATTGTGTATAGTAAATCGATG  
TGACACGAAACATGCTCATAAGCTGGAAATAACGTTTCAATACTGAAGATGAAGCAGTAAAAACGTCCTCA  
TTGGATTTTTTGTAAATTATTACATTTTAATGTTTAGTACCTATGATAAATATTTGTTGTTCTTTAAAA  
AAAAACAATTTTGAATTGAGCATTTAGTGTTACAATTTGTTGTTTCAAAGGTTTGGTTTCCAAACCGAA  
GAGCCAAATGGAGACGGGAAGAAAACTACGAAATCAGAGACGAGCTGCCGAGCAAGCGGCCGTGCTGT  
CAACAATACACCAGGTGCGCTCCCTCTCAATTCAGGTTTTCCAAATTCCTTGTATCCCGGTATAGGACAA  
CCAATGGCTAGCATGGGGGATTCTTACAGGTGGGCCTACTAATAGATGCTAATATGTAACATTTTCTGAT  
TTGTTGCTGATGAGATTAATTATTTGGCGGGGAGTTTTAACTTTAAACCATAAAACAGGCAAATATTCAA  
GAGATTGTAATGTAGAAATCCTTCTATCATAGTGTTTTTCTAGTCGAAAAGAATGCTATATAGTTTCTC  
TTTAGTATGAAGATTGAGTAAATTAAGATGAAATGTTTTAATTGAACATTTTAGCAGTGGCAAAACGGC  
TCATTAAACGACTCTGAGTTGTTTCTTTTTTTAAGTACAAACTTTTAGCTCATAGCTACGTCATCTCCTG  
GGCGATTTGGGATCTAACTACACTTTTGTATTTAGGAGATCAGACTCTTCAATTGATGCATTTTACCAA  
AGGTCTCAAAGATTAATTTACTCTAATCTTGTCCAAAAGAATTTCAACTTCAGGTTTGCTGATAGAGGTC  
CTGATGAATAATGTGTTTTGTGTGTTTTGAAGTAAGTACAAAACAACACAATGGGCTATCTGTGCTCTG  
CCCACCACGGGTATCGAAAACCGGTTTTTAGCGTTGTAGTTCGCGAGACATACGGCTGAGCCACTGAGGG  
GCCCTGATGAGTAATAAAATCGAATATGCACGACCCACACTTGATATTGCTGGCACACTAAAATCTAGCT  
AATAAAATGAAAAAAAGTCTCATAGATAAATTTAATCTAATTTTGCCTAAAATAACTTTAACTGACGT  
GGCTATTGAGGATACCCTTTTGTTCGCTATTATGTTTATACTAGCAGTGTATTTTTATTATTTTACTTT  
TCTGTGAGATATACCAGCTCAGAAATTTCAAACATATGCAGAAATTTTATAAGAGGTTTCATACAATATGT  
TTCTTCCTCAGTTCTATTCCACCGATGTCCACTTACTCTATGCCGAACAATATGGCACCACCTCTGTCT  
TTCAGCAGCAAGCGTCATCTTATTCTTGCATGTTACCACCAGGGAGCGCTAGAAGTTACGACCATCTTTC  
ACTAAGTAGTTATAGCCGACCATCTTGTCTCCAGCACAACCATATGTAATGCAGCCCGTCAATGGTCAG  
TTTTCTGCAAGTGAACAATGGTGGTACTGGTCTACAGGTAAATAATTATGTTTGTATTATAATATTTGTTT  
TCCACTATTTTCTAATGTATTATGTTTCAAGCATATGTAAATATTTCCGGAACACCCAAACGGACTATT  
GTGTTTCTAACAAATAACTACCTATGTTTCATTAAAGAGATTAAGAAGGCAAGTAGCTGTGTTAGTATAA  
ATATGGGGCCTGACATGGCCTGATGTATTTACCGAACATGCTCGCTCAATTAGTCATGGAAGCGTTAGAA  
TGTGACGGCTAGCCCTTGCCTAAATTTACGACAAATTTAACAGAAAAAGTTATAACTTCGTTTCCAATG  
CAACATTTCTGGATAATGAGAACTTCTGAAAAGAATTTATGGACTTTATTGAAAGTGGAAGAGAACATTTT  
GAAATATTGACCTGAAGAACATACCGAGAAAAAAATAGTTCCACATTTTTTAGAACTTTTTTTCATCCATTA  
GAAATTAACAAATAAATGACTTAGATATACTTAAGTACATGCAATCTAAAACAGAAACGCGTTTTGTATA  
GAAACGATTGTAGATTTGACGGCGCAACACGAGTTTTACATACTTAGTAAATTTAAATATTGAACATTAT  
TTGAGAGCTTTTCTTCTTTTAGATAAATGTAGATATTCGATGAACACTGAATGTTAAGTTTTGCTGCCTT  
ATTAACTTGTGTTACTTTTCAATATTTTACTAAGTTTTTGTAGAAAATATATTCTGATTGCTC  
GTTAAAACAATCAAATAAAATGCTTAAGTTCTGTTTCAAAAACATTAGGAAGCTTTATCTTAAAGGTCAA  
GTGATCTTTGATTCCATCATAATGTTACAAATATACAAATATTTAACACCTTAGCCAATGGTTCAAAAAC  
ACTCCTAAAAGAGCTAGACGATCACGAGTGATGAAGAGACTTTTAGAAGATTGGTAATTTAGACTGTAG  
AAGAACGTTTAGAGGATTAAAGTGACCAAGAGGGTTGAGTTTTAAAAATGTGGAACATTTTTTTTCTTAGT  
ACATTTCTTTAAACCAATACTTCAAAATGTTTCTTCCACTTTCAATAAAGTTCTTAAATTTCTTTTCAAGAA  
GTTCTCATTAACCAGAATGTTGCATCAGATTAAGTGAACATGAGTGTTGAGGGGACTTGTAAGAGCTAG

ATGATATAGAGTGACGAGGAGGTTCTTAGAGTGATGAGGGAACTTTTATATTAGGTGACCTAGAATGTTG  
AGAAGACTTTTATAGAAGATTTGGTGACCTAGAGTGATGAGATGATTTTTAAAAGATTAGGTGATCTGGGGT  
GATGAGATGACTTTTTAAATATTAGATGACACAAAGGGATGAAAGAACCTCTAAAGAGTAGGTAATTTAG  
AGTAATGAGATTACCTTTAGAAGCTTAGATGACTTAGAAAGGTGAAAGAACCTTTAGAAAAGTTAGGTGAC  
TTAGAGTGACTAGAGAACATATAAAGAAGCTAGGTGACCTATAGTGATGAGGGGACTTCTAGAAGAATTAG  
ATGATTTAAAGTGATAAAGAAATTTCCAGAGATTTAGATGACCTGGAGTAATTAGGAATCTTTAAAAAC  
AGAAGGTTAGTTGTTCTCAATCTTTCTTCAACCAAGGGCTGGTTATTTATAAATCCAAAATTTTATGGAC  
TGCTCTGTACAGTATTAAGTTTTGAAAAATACTTTTATATTACATTATAAAACAACCTTACTTAAGTCACT  
ACATTTAAAAACACACGTTTTCTTTCTTGTCTTGTGGACTGATTAATATCTTGCAGTGAACAAGTAC  
TGTTCTATGGCAAGGTGATTAGGAATCACTGAGTTGGATGATTTAGAGTAGTGAGTGAATTTCTAAAGAA  
TTAGGTAACCTAGTGTAGTTTGGATATTCTAGAAAATTGGGTGATCTTGAATTATGGGACGATTTCTAG  
AGAGTTAGGTGACCAAGAGTGATTAGGATATTCCAAAAAAATTAGGTGGTCTAGTTGTTATTTGAATTA  
AGCACAAAGCTACACAATGGGCTATCAGTGCTCTGTCCACCACGGGTATTGAAACCCGAATTTTAGCGTG  
TAAGTCCGCAGACATACCGCTGAGCCACTGGGGGGCGAGGTGGTTTAGACTTATAAGGGAATTTCAAAGG  
AATTGAAGGATATAGTGTGTTCTTCAGACAAAGTATTAAATAATTTACGGGAACAATACAGTGAATTAAG  
ATATTTATGAGGTTATATTATAGTTTAATATACTTCCATAAAAGGAATAATATAAGTATGTTTCTAACTA  
GCAGGTGGTGAGAATCAGATGTTGTGCTTTTTTTTTATTTCTGATAGCAGTAATACTTAATAAAAGGTTAG  
ATGAAACTTAGATCATCTTACTCAGAGAGATAATCCATAAAGGTTCCAGTAAAGTGGATTGCGTAAAAAT  
TAAATGCTTTCCTTTACTTCTTGTGAAATGTTACTGCTTTTGTTTTTCAAAGGAATTGTTTATTAAAAATA  
TCTGCAAATTTACGTTTTAAAGAAACGAACTGTTTATAGTAAATATGTTTGTTGAAAAACGATTTAGTTA  
CCACTGAGTTTCTGACTTCTGGTTTTATCAGTAAATAATCTTTATGCTGGTATATTAGGTAATTATAACA  
GTTACTTCCTGTTTAGTTATTTCGATTCAGATAACGTTTATTGTAAGAAATACACTGTTTGAATTAATTA  
CTTTTCATCGTTATTGTCAAGGTTTGATATCACCGGGACTGTCTGTCCCAGTTCAAGTGCCAGGACAACC  
AGCAGATTTGAATATGTCTTCAGCCTACTGGCCAAGAATACAGTGACCCTGGGAGCGTCAGAAGCACGTG  
TGGACAAAAAGAAACAAAAACAAAAAACTAGCTTTTGACGCTGACAACGTTTTAAATATTTTGTAT
