# Supplementary material for: Evolutionary Conservation and Diversification of Five Pax6 Homologs in the Horseshoe Crab Species Cluster
Source: MDPI journal article supplement (doi:10.3390/arthropoda2010007), 2024-03-04
Supplement: s1 [file s1]

>CM022391.1:c183616299-183591800 Carinoscorpius rotundicauda isolate  
IMCB\_SINMHF\_001 chromosome 1, whole genome shotgun sequence  
TGACGACTCCACGCTGTTCCACTCTGAGAAAACCTGACCAGCGGCTACTAACAGCAGAGTGTTTCGATGAAG  
**ATGCCCCATAAAG**GTTAGAACTTTAAATTTTTGTGTTATTTGTCCCCCCCCCCTGAAAACAATCTGAAT  
ATGTGAGATGGTTTGAAGAGTTTGTGATGACAAGAAACCCACTTGAAGTAAAAATGGGTTTTAGAACATT  
TATTTAAATAAAGTAGAGAACAGCATTTTCGACCACCTTAGGTGCGCTTCAGTTTAAACAACAAGAAGA  
AAAAGTAAAACAAAAAACACCTGAGGACGATATAAGAAGGTCGAACTTCATTCTGTAGTTTATTATCAT  
TGAAATGTTAAGACCCATACCAGCCGTCTTGAGAATGCATGATTTCAATAGTGTTTTTCATTTAGCGTGTA  
ATAACCACCTGGTGGCCCCCAGTGGCTCAGCGGTATGTCTGCGGACTTACACGCTAAAAATCCGGGTTTC  
GATACCCGTGGTGGGCAGAGCACAGATAGCCATTGTGTAGCTTTGTGCTTAATTCAAAACAACAACAAC  
AACCACCTGGTGAATTAAGGCTTACGAAAACAAAACAAAACAGGTAAACAGAAAACAGGTTCCCTGAGTCG  
TGGTGGATTTCAGCACAGATAGTCTGTTGTGTACCTTTGTGCTCAACGTCAAACACACAAAAATGTAGTGAA  
CACAACGAACTATCTATATCTTTATCTATATCGACTTTAGTTTTAGAGCAAAGCTACATTGGACTATCTT  
CTGTGTTTACC CGCATGAAACGAACCCAAATTTTTTGTGTTTTAAATCCGTAAATTTATCGCTGTCCCAT  
CGGGGACTTATTACACCGAATTACTCATCGGCGGTTTGTCCACCGTGAGAAATCGAACCCTAGATTTT  
TGCGTTATAACTGCAAACTCACCTCCAGCTTAGGAGGGAGCATTAAATTTACGAATTTCTCAGTTGGTTACA  
AAGTGAAATTGATGTATCTCTGCTCTGCATCAAACTCGAATTATATTTATTGCTGTTGTAAATTTTATC  
CGGCCCCAATTCTTTTACAGAAAGTTGAAGTTTATTATTTCAAATTTGCTTTAAAATGCTTCACCAACCT  
GTGCTTCCATTTTCATTTATTGTGCGCTACAAATTTATGTGGTTAAATTTCTTGCTCGCTTTACGATTTA  
AAAATCTCGATGTGATTTCAACAGATGGCTTTTTTTTACATTTGATTTATCCAGAAGTTATAATGTGAGCA  
TTGTTTTGTGTTGATTACAACCGTGTCTGCATAACTATCTAAACGACTTGGTTAGTTGATTCAAAGCTT  
TTTATTGCAAAGTTTTCATATTAAGACGCTAGGTGTAAATTTTCGAGGTTTTTTTTATTCAACATTTTTTC  
ATTTGGGAAGATTTCTCTCGTTCTCTGTAG**GTACAGTGGGGTCAATCAGCTAGGTGGAATGTACGTG**  
**AATGGAAGACCTTTGCCAGACTCGACTCGTCAGAAGATTGTGGAGCTGGCCACAGTGGTGTAGGCTT**  
**GCGATATCTCCCGCATACTTCAGGTATCGAACGGCTGCGTCTCCAAGATACTGGGACGTTATTATGAGAC**  
**CGGTTCCATCAAACCTCGGACTATTGGTGGCAGTAAGCCTCGTGTGGCCACTGCGGCTGTAGTCAATAGG**  
**ATAGCCGACTACAAAAGGGAGTGTCTTCCATCTTTGCTGGGAAATGCGAGACCGACTTTTGGTGAAG**  
**GAGTGTGTAACAGTGAAAAACATTCACAGC**GTGAGTGAACGATACGTAGAACATAAGGAAACATAAAGAAA  
ATCCCAAATTTGTTGCACTTGTCCATTGTTTTTGAATATTCTTTCTCATATTCGATTTTCGCCCCC  
TAAATGCTTAATATGCAATAAATAGCAATTATATTTTATTTTAAAGCTAATGTGTTAAGATAAAA  
TATGTTTTTAAAGGAGTAATAAATCTAAAGGAACTGTAATAAGTTGACTGATGTTTTTTCAGCCTCAAAA  
TGTTCTCTATGTACTACAGTTATTCTTTACAACGTAGCTTATTTTTGACTCTCTTCTACTCAGAAGTG  
TGTCATTAGTTTTTGGAAAAGTTAGCGAACTAATATAAATAAATAAACAACCTCTGTCTTATGTATGAC  
GAGTTTATTTATCCCATATAGTTTTTTCAGCATATACATATATATATATTTTACATATACCTCTTCATATAT  
TCTAATTAATGCGTTTCAGAGTTTGAGAAATTTCCGACTTTTCATGTAAATAAATAAACAATATTTTGACA  
TTATTTACGTGAACGCGGGTTACATGCTTTAAAATTACACTCTGCTCTAAACAGACCTGGACTTGTTACT  
GTGACAACACCTTTCAAGGACATATCGTCAGACGGATACGTCTTTCCAATTGGATGAAATGTTTCATAGC  
CCTTTGTTGATTAACCTACTCCCCACCCCTCAGTGGCACAGCGGTATGACTCTGTATTTATAACTCTAGAA  
ACCCGGGGTTCGATACCCGTGTTGGGTGGAGACCCATAGATCACTATATAGCTTTGTGCTTAAACGAAC  
ATAAGTGTTTCATCTCTATAGAGTAGTTTCGATTAACATAACGTGAGTTATTGTCTTGTTTTACATTTGTT  
TAGATTTTTTTTTTCTTTTCAAATTCAGTTTAAATATGTGAATACACACACTGTATTTTCGTGTATAGCAT  
CGAGACAGTTTTTAAAACTAATTTTATATTCCAACATTGATATTATTGCAATACATAAATCCTGCTGTG  
TTATCTTCTTAGTACAATTACTTTCTACAATAAATGCGTTGTTGCTGTGTTATCTCTCAGTACAATTACT  
TTCTACAATAAATACATTGTTGCTTTGTGAGATCTCAGTATAATTACTTTTTTACAATAAATACATTGTTG  
AGGTACCTTTCTTTTAGTACAATTACTTTTTTACAATGTCAAAGATGTTACTTGTGTAGATTATTTCGAAGT  
TATTTCTTTAAACATCTTGAGTGTCTTAATTATTTTTTTACCCTCGCGAGGATATAATTGTTATAAATT  
TAAATTTGTGTATTTTCTTAGAGCAAAGCCACATTGGGCTATCTGCTGAGCTAACCGAAGGGGAATCGAAC  
CGCTGATTTTAGTGTAGTAAATCCGTAGACGTACCGCTGTACTAGAGGGGTGTGTGTAAATTTTAAATAAG  
TTGTTGTTTTTAACTTCGTGGGTGTGTGTAAATTTTAAATAAGTTGTTGTTTTGAACCTTCGTGGGTGTGTG

TAAATTTTAATAAGTTGTTGTTTTTAACTTCGTGGGTGTGTGTAAATTTTAATAAGTTGTTGTTTTTAACT  
TTCGTGGGTGTGTAAATTTTAATAAGTTGTTGTTTTTAACTTCGTGGGTGTGTGTAAATTTTAATAAGT  
AATAAGTTGTTGTTTTTAACTTCGTGGGTGTGTGTAAATTTTAATAAGTAATAAGTTGTTGTTTTTAACT  
TCGTGGGTGTGTGTAAATTTTAATAAGTAATAAGTTGTTGTTTTTAACTTCGTGGGTGTGTGTAAATTTT  
AATAAGTTGTTGTTTTTAACTTCGTGGGTGTGTGTAAATTTTAATAAGTTGTTGTTTTTAACTTCGTAGG  
TGTGTGTAAATTTTAATAAGTTGTTTTTAACTTCGTGGGTGTTAAATTAATGAACACTTTTGATTAAATT  
ACCTACCTAGCAAATAATTTTAAATTTAAGCATGATAATTTTGTATATGTATACAATTGTTTTTTTTGTAT  
TATACGTTTATGAGATTGTTAAACGTATTGAAAGAAACAATATTGGCGAATCAGACTACGAAAAGATGAA  
AACACGCGCAACTGTTTGTGTTGTTATCAAACATGAATCTACATTATAAATCATCTATCCTGTGTCGATCA  
GGGGTATCAAAACGCGGGTTCTAACGTTATAATCGCGCAGACTTACCGTTGTGCTGCTGGAGAGCGTTCA  
AAGTGAGGAAAACCTGAAAACAAACCTACCAAACATTAAGTAAAGACAAGAGGATATCCGCTGTGTCCA  
CCACTGGGTATCGAAGTCCAGATAACTGAAAGAAAAATTCTGAAACATAAAAACTTCATATTCGAATTTTC  
GAGTTCAAATGAAAACGCGAATTATTTCTTTAAGAACTTACATTGTCTCATGTGTGAAGTTTAAAAAT  
TAAATTTAAATAATTTTTCAGTTAAATGGTTTCGTTTGTGGCTGATCTTGTAGGAACGTTTTCCTAATC  
AGCAAGTCTGTACGCCCTCTATGTCTTCCGGGGGATCAGCGGTAAGTCTTCGGATTTAAAGCGCTAAAAAT  
CGGGTGTTCGATTCTCTCGGTTGATGCAGCAGATAGCCCGATGTGGTTTCACTCTAACAAACACACACA  
CACGTCCTACACGGTTGATGTGGAAGACTTAATACGGACTTTATCTTCAGTGGATACACCTTCAACTT  
TAACTTGGATATAGTTTCCATTTTAGTCTAACGTGGACATAATTCCTAATTTAATCTATACTAAAAACAC  
TTCCTAATTTTGTTTAATATAGACTTACTTCGTGATTTAATTTAGCCTAGTTATACGTCATAACGTAGTT  
TAAAGTGGTTTTACTTTCATAAATTATCTAATAGAGTATATACTTTAAATTCAGTTCAATATGGACGTAC  
TTTATAACTTATTTTAAAGACATATACTTTCTATTACTGCACTAAACACTAAGAGCTATTATGTTTTGTT  
TTAACAGTAACGTATACAATTACATTAATCCCTATAAAAAAAAAGGAAAACGTATTTTATTTTCGTTTGT  
TGTTTTGTAGTTAAGCACAAAGTTGTAAATGAGTTATCTGTGTTCCGTCCACCACGGGTATCAAAACCA  
GTTTCTAGCGTTGTAAATCTGCAGACATACTGCTCTGTCACTAGGGGGCGTGTATTTAAACAGTGCGGTA  
ATAGATAACTAAATGTAATGGGTAAATTAGACTCTAAATACAATGGGTAAATTTAACTCGAAATATAA  
TGGATTAGGTTAGCCTCTAAATATAATGAGTTAAATTAGACTCTAAATGTAATGAGTTAGGTTAGCCTCT  
AAATATAATGAGTTAAATTAGACTCTAAATATAGTGTGTTAAATTTAACTCGAAATATAATGGATTAGGT  
TAGCCTCTAAATACAGTGAGTTAAATTAGACTCTAAATATAATGAGTTAAATTACCCTCTAAATTTTATG  
TGTTAAATTAGACTCTAAATATAATGTGTTAAATTACCCTCTAAATTTGTATGTGTTAAATTAGACTCTAA  
ATACAATGGGTAAATTTAACTCGAAATATAATGGATTAGGTTAGCCTCTAAATATAATGAGTTAAATTA  
GACTCTAAATATAATGGATTAGGTTAGCCTCTAAATATAGTGAGTTAAATTAGACTCTAAATGTAATGAG  
TTAGGTTAGCCTCTAAATATAATGAGTTAAATTAGACTCTAAATATAATGAGTTAAATTAGACTCTAAAT  
ATAATGAGTTAAATTACCCTCTAAATTTTATGTGTTAAATTAGACTCTAAATATAGTGTGTTAAATTTAA  
CTCGAAATATAATGGATTAGGTTAGCCTCTAAATACAGTGAGTTAAATTAGACTCTAAATATAATGAGTT  
AAATTACCCTCTAAATTTTATGTGTTAAATTAGACTCTAAATACAATGGGTAAATTTAACTCGAAATAT  
AATGGATTAGGTTAGCCTCTAAATATAATGTGTTAAATTTAACTCGAAATATAATGTGTTAAATTAGACT  
CTAAATATAATGTGTTAAATTAGACTCTAAATATAATGAGTTAAATTAGACTCTAAATATAATGTGTTAA  
ATTAGACTCTAAATATAATGTGTTAAATTACCCTCTAAATACAATGGGTAAATTTAACTCGAAATATAA  
TGGATTAGGTTAGCCTCTAAATACAGTGAGTTAAATTAGACTCTAAATATAGTGAGTTAAATTGACCTCT  
CTCATTCGCTTTCACCTACGTGTTTATTTTAAATTTTGTGTCAGGAATTTTAAATTCATTTTACGATA  
ACGACCAAAATTTTCTAATAACCTTTAGATTGCTTATCGTACACGTAATCAACAGTATGCCTGTCTGTGTA  
AAGTGGCGAGATTTATTCAAACCAAATCTCAGATCAAATGGTTACCAACACGTTATTTATTCTACGTATG  
GCTCTGTATAAAGTAACTGGTCTAATTAAGTGCACAAATTATTGAATTAATGTAAATTGTATGAGCTTT  
TCTTTAATAATCAAATAACGAATTGCTGTGTTTGTCTGTTTTTAGTGGTATCATAAATCATTATGTTT  
CACAATTATTTTATGATTTTATAACATTAACAAAAACCAACATATATCAATGAATAACACGCTTTGGTG  
TTTAAGCCTTTTCTTTTAGCAGCATGATAATAATGTACAACATTTGTTGTACAAGGTGCGTAACAGAA  
TAAAGAAAACATGCAACATGCTTTAAAGCAGGCCCGGCATAGTCAGGTGGTTAAGACACTCGACTCGCA  
ATCCAAGGGTTGCGGGTTAGATCCTCGTCACAACAAACATGCTCGCCCTTTCAGCCGTGGGAGCGTTATA  
ATGTGACGGTTAATCCCACTATTTCGTTGATAAAAGAGTAGCCCAAGAGTTGGCGGTGGGTGGTGATGATG

ACTAGCTATTTTAATTCTCGCCTTACACTGCTAAATTAGGGACGGCTAGCACAGATAGATCTCGGGTAGC  
ATTGCGCAAAATTTTCAGAAATAAACAAAGCCACCTAGCATGCTCTAATGATGCAC'TTAGCAACATAGCAAT  
CACATATGCTTTCAATCATGGTCATGTGAAACATTTAGCAACGTAACCATCTATTTTGAAACATTTTAA  
AAATCTGTGTCAAGATGGGTTTTATGCTATATAACAACGCAAATCACGTATTTGGACTAATGGAAGTGT  
AATATATTGTTGTTTTTAAATAAAATTCGTGTGTCTATGAGCTATGTTATGCTGTTTTCATCAGTAGCT  
AACACTAATATTACCCATCTACTTATATGAGTTGTTTCAGTGTTATTGCTAGTTGCTTAGATACATACATC  
GTGTATCCGATTACTTCAATAAGGAGAGTTCCCAGTCGAGGTTCCGGTGT'TTGGAAATATATTCAAGGGTAG  
TTGAAAAAGAAATATGTCACGAGCATTTGACAGGCGAATCCAACATGGTTTCAGAAAGCTTTGACAAGCG  
AAACAGCAGGCCATATCGACCGTATTAAGGACTTCTTTTTAAGAGAATAAATATATATTTTTGTTTGGGCT  
TTGACGAGGTTTTTGCATGCTTAAGGTAAAGAGTGTCAATTCAGGTCTGCCCTGTAGAACCAGGTGGTTAG  
GGTGCTCTACGCATAATCCGAGGGTCGCAAGTTTGAATCCCCCTCACACCAAACATACTCGCCCTTTTCAG  
CCTGGGGGGAGAGTTAGAACGTGACGGTCAATCCCCTACTTCGTTGGTAAAAGTGTAGCCTGAGAGTTAG  
CAGTCCCTCCGCTGGTACAGCGCTAAGTTTATGGATTTACAATGATAAAATCAGGGGTTTCGATTCCCCTCG  
GTGGACTCAGCGGTGGCCTGATGTGACTTTGCTTATTTATCACAAATCAAGTCGGGTAAAGAGTTGGTAG  
TGGGTGGCGATAACTAGCTGTCTTCTCTAGTCTTATACTGCTAAATTAGGAAAGGCTAGCGCAGATAG  
CCGTCGTGTTACCCGAAGCGAATTTCAAAAAACAAACAAACAAACATTCAGGTCAGTGAATGATT  
AAAGTAATAATAAAGATTAATGGACTGTCTGAAGTTAAGCACAAAGCTACACAATGGGCTATCTCTGCTC  
TGCTCAACACTGGTATCGAAACCCGATTTCTAGCGTTGTAAGTTTCGTAGACATACGGCTATGTCACTGGG  
GAGGGGCAAAATAATCTTATCGGAAAAATGAAGGGGGGCATTTTTTGTATAAATAAACAAATTTCAAACATG  
TATTTGGGTTTTGTTTCGTTTTTGTGCTTCGAGGTGTTTTCGGAAGTTTATGATAAAAAATATTTAACCGC  
TAAGTCATTTAAAGCGTATATATAAACGCATACAAGCAGTGCTAAATTAACAAACAGCAAGGTAACATA  
ATTATACTAGTCATAAGACATTGCTGTTAAGCCTACTTCACTTTTAAACGCCATTTTCTTAATCTATTTT  
TTGGGGATTTTCAATATTATACTGATAACGTTCCCTATCATGTTATATTTGCCATATTCATTACCCACGAC  
ACGTTTCTCTCGATCTAGTGTTCTTCAGGCTGGCTCAGATACATTCTTTTAAATCTTGAAAACTCCAAGG  
AACTAGGCTAGTGACACATTATCTAGAATTGAAATAGGCCTAGTATTGCTTGTTTTGAATTTTCGCGCAAA  
GATACACGAGGGCTATCTGCGCGGCTTAGTCTTATAATAAGTAACACTGCAATAATCTTTCATTAGCTGT  
AGAGAGCGCACGTGCGATATATGATGTGTGAACATAATGATATTTATATTACAAAACAATACACACATTT  
CCACAGTATTTTCATACGTATTATTGAAACATGTAGCACGTTTGTGTTTTGATTACAGTTGTTCTGTTTG  
TCCGTCGTCGTTTGTTCATTTTCTAAACTACTAGCCTAAACGGTTTTCTTGCTAAACAAGAAAGAAAGCA  
CACGAAAACATACTAGTTTTATGAAGTTTACTAAACTAATATTTAACAAATAGTGTCAATGTATCTTTGT  
TGTCTAGTTTTGTAAACAGTTAAACGTATTGACCGCTTAATAAATGTAGTAATATTATACAAAACTCA  
CGCCCCAAGTAAATCAGTACAAAGGAACACCTTTATACCTATATTAATAAATGTAATATAACATCTAAGC  
TCGCCCCCTACATCCATACACTCAATTACACAACGTGATAAATATATCATTTGTGAATGAAATGCGCATG  
CGTATTTTTTGACCTAAATAAGCTGAAAAAGCCACAGAATTTTTATTAAGCGTAATGCTAATTTTAAAG  
TTACACGCGGGTTAAGGGTTATTTGTGTGAAATGCTTTGCAAATAACAACATTTAAATTTGAAACTCAAGC  
CAGTCGTCCCGTGATTATAACGACATCGTGTTTTCAAACAACAGGTAAGGTGATGCTGAATTTTAAAGCT  
GTAAATATTTGGTGATGATCGACAAATTGAAATTTTTCGAAGCGTATTATTCATATAGATAGAAGGCCTG  
GCATGGCCGAGCGGTTAAGGCGTGCACTCGTAATCCGAGGGTCGCGGGTTCGCGCCCGCTCGCGCTAA  
ATATGCTCGCCCTCCAGCCGTGGGGGTGTATAATGTTACTATTTCGTTGGTGAAAGAGTAGCCCAAGAGT  
TGCGCGTGGGTGGTGATGACTAGCTGCCTTCCCTCTAGTCTTACACTGCAAAATTAGGGACGGCTAGCAC  
AGATAGCCCTCGAGTAGCTTTGTGCGAAATTCAAAACAAACAAACAAACATATAGATAGGCACAAGACC  
TACTTTGAGTGACGTGTTATTCATATAGATAGGCACAAGACCTACTTTGAGTGACGTGTTATTCATATAG  
ATAGGCACAAGACCTACTTTGAGCGACTCTTAATAGTGACGTTATTTTGTGTGTGTCTACGTGTACGTG  
TTGTTAAATCTAATAAAATATCCTTTATATTGTAAAATTCTAAAATTACTCTAAAAGTTATTTTTTCAGA  
GTACTGCTTATGTTGTTTCACGTTAATAAAAAAATCAACATTTTTATATTTTAAATAAAAGACCGTGAA  
CATGTTTCGTTATTTTTTGTGTTTCCAAATCTGTTTTTCTGCGTGTTTCAGAGTTTTGTAAATTTCTGAAC  
ATTTTGTTAACGAGTGACAGAAACACAGATGACTAATTTCAAGTTTTATTTTAAATAACGTTTATAACA  
GCGTCTCCTATTGGAGAAAATTTTGTGTGGTTAGATAGGAATGCAAACTGAGTGAAATACTAGAACGTATA  
TGAATATATATGTATTGAAACGTCAATTACATGCCATTATATACCAGCATATTTGACAAAATCTAAGGCA

TTTTAATAATTCCATTTAGGTTTCTTCAATCAATAGAGTTTTAAGGAACCTCTCGTCTCAAAAGGATCTT  
CACCGGACCTCTCTCAAGTTTCCATGGCTGGGCCAGAGACGGTTTACGACAACTGAGGATGTTAAACG  
GAACCCAGCCGTGGCCGTGGTACCCGACGGGCACCTTCTCATCATTTTTCACGGCGTACCTCCGCCCTCATC  
ACCGGTTACGTTGGGTCCCAATACCGGACTTGGGGGATCTGTACCAATCGGAAATGGCCACTCAAGTATA  
GGCTCGTGCGAAACTAATCGCCATGACCACGTGAATGTACAAAGAAAGGTGAGTCTAGGTATGGAACCT  
GAAAGTTGTTATTAAGTCCACGTGTTTTGTATGCACGGGTTTGAATGACACTCTAATGTTTTGCCAATC  
TCGAGACCGTACCCGGGACCTCCCTTATCATTTAAGCTAAAAGATGAACCTATATGTGCGATTAGCATTG  
CAATTTGCTCTAATGACATCTTGCTAGAAGCACTTGGATTGAAATATTTATCTATCTAATATCTGTACTG  
AAGGGTTAACCCAGTGCTCCTCTCGATAAATCACTTTATAAATAATTCATATTATCTCGTTATTGAAT  
TGACAAGTATTTATCCTTGGCATAAACAGTAAAATATACCCTTAAGTTATTTTAGACATATTTCCAAAATA  
GGGACACAAATTTATATGAAGATGTAAAGCAATTAGTAAACAAAAACAAGAACAAAAACCCTTTAGTAAG  
CCGGGAAACCAAGTTGATAACTAATTTGTTACAGTCGTGTGACCTTGAACATGTTTAAATGCGTATCTA  
AACTGTATGGTAAACGTAATTTATACGTGATAAATAAAGTTAAACAGACTGCAGTACATATAAAGCAAC  
TGTACAAAGTGTTAACAGTCTATGTCTGGAACAAGGTGTTAATAGTCTGTGTCTGGTACAAGGTGTTAAC  
AGTCTATGTCTGGAACAAGGTGTTAATAGTCTGTGTCTGGAACAAGGTGTTAATAGTCTGTGTCTGGTAC  
AAGGTATTAATAGTCTGTGTCTGGAACAAGGTGTTAATAGTCTGTGTCTGGTACAAGGTGTTAACAGTCT  
ATGTCTGGAACAAGGTGTTAATAGTCTGTGTCTGGTACAAGGTGTTAATAGTCTGTGTCTGGTACAAGGT  
ATTAATAGTCTGTGTCTGGTACAAGGTGTTAACAGTCTATGTCTGGTACAAGGTGTTAATAGTCTGTGTCT  
TGGTACAAGGTGTTAATAGTCTGTGTCTGGTACAAGGTGTTAATAGTCTGTGTCTAGTACAAGGTGTTAG  
TAGCACTGCGTTAGGTTGGGCCGCCCTTCTATTTTGTCTGGTACAAGGTGTTAATAGTCTGTGTCTGGTAC  
AAGGTATTAATAGTCTGTGTCTAGTACATAGTTAATAGTTTGTGTCTGGTACAAAGTGTTAATAGTCTAT  
GTCTGGTACAAGGTGTTAATAGTCTGTGTCTAGTACAAGGTGTTAATAGTCTGTGTCTAGTACAAGGTGT  
TAGTAGCACTGCGTTAGGTTGGGCCGCCCTTCTATTTTTTATTTGAATTATTGAGAACCATATTATATTGA  
CGAAACTCAGTTACAAGTAATGGTAATAAACATACATTGATGAAGACACCTGCGTACATCAGAAATTTA  
TAACTACGAACTTTATACATCCATTTTTATCAGCAAGCGATACTATCTCCTAAAACGACAATTTTCGGCC  
GTAATCCTGACAATATTTAAAAAAGTTGGACGGTCAAGGAGATTCAATTTACTTTTGGTTCCACACATTA  
GCCACAAAATGCTAAATAACATTATAAGTGTAACCATAGTTGAAAACGCTTTCACACACACAATAATTC  
ACAATATTTAGTGATTGGATGGTTGTTTGGAAATTAAGCACAAAGCAACACAATGGGCTGAGTGTGCTATG  
CCCACCACAGTTTATTTCTTCTCGCCACATGGCCAAACATAGTGGAATGGCTGAGGCCCTATACTCGC  
ATTCTAAGGTCCCAATCCCTTTACCAAATACGCTCACACTTTTCAGCCCTTGAAGTGTTATAATGTGAC  
GGTAAATCCCATATTTTGTGGTAAAGAGCAACCGAAGTGTTGACGGTAAGCGATGTGACTGGCTACCT  
TCTTATATAATTATATTACTTCATAATTAAGGATAACTCTCGAGTGGTCTACACGAAATTCAAAACCAA  
AACCAAGCAACCTTTAACGTGTATATGGTTTTATGCACGAATTTGTTGCAACTCATTATAATGAATGTCA  
TGTAATGTTTTTCAGCCTAGATTTTAAATAAATTTATTACAGTTTCAAACAAGTTATTTTAAACAGTTCT  
TAATATTTTATGGCCGAATTTGAAGTAAAATGATAAACGTGTGGCATTGGTATTACAAACTAAAATATAT  
AGACTTAAATCCAGGTTTCGATCCATCGCGGTGAACACAGCAGATAGCTCAGTGTGTCTTTGTTCTAAAA  
CAAACAAATCTTGTTAACTATGAACGTTTGTGTGTTGTTGTTTTGTCCATCACAAACATACAGAATG  
GTCTATTTGTGCTGTGCCTACTACGGGTATCGAAATCCTGTTATTAACGTTATAAACCTTCAGGTTTACT  
GGTGAGCCATTGGAGAAGGTGGGTCAACCATGAAAATAAAACGTTTGGATTAGACTAGAGAAAAGAAAAA  
AAAACATCTAGTAAAAGAAAAAAATGGAGACTTATCATGGCCTCTTTTCAAAATCCCACTTTCTATTGA  
AAATTTTACCCCAGTAATTTCTCTGAACCGAATGCAATGTCCGTTTTTTGTGGCGCCTTCCAAATCCTAC  
CAAACAGGAAAGTAGATCTAATGAGCCGAAGCGTGCTACGAACCGGGGAGTTCAAAGCAAACGATTACAC  
CTTCTGGTCTTCATTGTCTCTCGCCTCTCGCGTCCACTGGTTGTTTACAGAGGAGAAATACGAGCTGGTTTGT  
ACATTCGACTCTTCGACATCCTGGGTGTCTAAAAGTCATGAGGAAACGTACCCTTTCTAAAGTCTTAG  
GTTGGCAGTGCTTCGTCTTTTACTTGGGAACAATCAGAGGGAGTTGTTTTTAAACGCCGAATTTCTCCGAC  
CCGGTAAAGTTTGGGATAAAAAGAATGGTTCGCTAACTTTTTTTTTTAAAGCCTTACTGATGGCAGAGGAG  
TGAGAGGAGATGGTGTAACGTGCGAATTTGAGATAACTGTGATTTTCGTGACTAGAACGCTCGTTGGCGTT  
TGTATGTGTGTGATCGCTGCTGTTTGTAAAGACCTTACACCACTCAGTCTTTGATTTAGCTGTCTCTGTG  
GCCAGCAACATTCAAATAAACTCCTCTGTGAAGGGAGCTTTTCTGCTCCCTAACCTCAAAGTATCGTAA

GTGAAATCAAAACAGAAATAAAAGGTCACCGTTCCCTTCACTGGGTTTTCTTGACCTGGAATATGGATCCAA  
GTCATTTTTCTGGCTCAGTACTTTTTCCCTAAATCAGTCTTTCTATTCTATGCTTTGTTTCGTACATTGTGTA  
AGGATTGTAAGGGGGGGGTAGGTGGTTTTGTTTGAAAATTTGGGGGAAGGGAGGCGTTAGCACTGGCGTTA  
TCCATCTATAACATGACTTTATTTATTACTCGCTGGTAATAGTACTGTAAGTGAACATTCTAATTCAGTG  
TGGTAAATAGAATGATATTTTAAAGAAACACTCGCATAAACATTCACTCTTTGTCATTTAGGCCACCCGA  
AGATTAGTTATAATCTCTTATTTCTATGGAAACATATTGCACTAAAAGTGCCCCGTTATATTCCCAGATT  
TTGTTGTTACTCTTGCAGAGTAAACACGATGATTGGCCACTTTTATCTATTGTGTTAGAAGTTTACTCAC  
AATGCCCTCATATTTGTCTATTCAACTGGTCATGCTTTTCAAGTCTAGGGAAGACTATAGATGTTTGTAAA  
TAACGTCACACAAGACGTGTACAGAGTAACATGAGAAACAAGTGGTAAACACGATCGGGAAAAGGGCTTA  
GTGCTTAAGTCTCAACCGTACGTTATCCATTAAACCTATTTGTGAACAGTCTCTTTTATAAGCTATTTGT  
GTGCACGTGAAAAATAAGAGAAAAAGTGTCTTTAGTTTCTTGACAAAACCCTTTAAATCAATTAAATTT  
CTTTTCGGCTCTAGATAAAAAATAATAATAATATATTATGTAACCTTGTGTATATAATAAAAAAGAGGTAA  
ATATATACAAGTTACAAGATATATTTTCGTAAATCATGAAAGTGAATTCATTTTTTCATTTCAGAGGAACC  
TCCAGTAGCCCATGCGAGTCTGCGGAACTAAAAGGCTTGTAAAGCAGGTTTCGGTCCCAATGGTGGGCAGA  
GCACAGACAGCTCATCGGGAAGCTTTACGATTAATTACGAACAAACAAAGGATTAGAGGAAATTTAGAAT  
ATTTCTTAGAACAAAGAACTAATTACTCTACAGTTTCTTTGCTTTAATTAATTAATTCCTTGAGGATATTT  
TAACGACCTTAATATATCAAAAAGTATGCAATAAATGTATATATTCTGTGTTTCGATTTTATTGTAAAAAGT  
AGCCTGGAATTCCTTTGAATTCGTGCGTCTCTTTGTTTGTGTTTGAATTTTCGTGCAAATTTTGTCTATAAGAA  
AACAAACAATCTCTGGTTCTCGAAGTCATCTGATGAAATTATGGATTTGTACTTAACATGACATCAAAAT  
ACTTGAAAAATTCGCCAATAAAACAGCGAGGTTGTGATTTCTGTACAACCTAACATATTTATCCATCTAATA  
TTCCATATCATACTACCATCTATTGTATTATTATAGAAACGATTCTAAAGTTTACTCGCAATATCCCTAG  
TAATGATGTGTTTTGTTTAAGAATTATAAAACTGAATAGTTTTCAATGTTATCATGCAAACATATAATTT  
TCATGCAAACAAACGCCATTATACACACACACACACACGTTTTCGTGTATATATGTATATATATATA  
TATGTTTCACTTACAAATACATTGTTTAGTTAGTACCAGCCGTGTTTGATCGATCTGATATATACGAGCT  
AGCATTTTAATAAACGTGTTAAATATATATTTTCATAGTTCATTCTAGTGATTTGACTACACTGAATATAA  
AGTGCACACAAAGTTCCTTCCACATATCCTAACCACATCGTAATGTCTGATCAGGTCTTACTGCATTTAA  
ACTTTATCTGTCTAACTCACTGATAGCTCATTTTTATGTGAGAAATATATTTTCACGCATGTACGCAGGGG  
GCTGGGGGAGTTACCCGAATCCTCTATTTTTGTAAACGTAAAAAAATATTCACTTACTTCTCTGTGTCCA  
TGTGCACACAAATCAAGTGTGAGTGGTCTAGCTTTAATGCGTATTCATTATGACACCATATTTACGTTAG  
TCATGTAAGCATGTTATTTTAGTAGTAGCGCCCCCAGTGGCTCAGCGGTATGTCTGCGGACTTACACGC  
TAAAATCCGGGTTTCGATACTCGTGGTGGGCAGAGCACAGATAACCCATTGTGTAGTTTTGTGCTTAATT  
CAAAACAACAACATATTTTAGTAGTGCGTATATGTGTTTTATGTCCAATGATTGAACTAGATAATAT  
GCTATGAGTTGTTAAATTAATAATATAATTCAACAATCAATAACTAGGCGGTGTGTAAGTAGCACAGTA  
CGTTATTTGTAACAAAACAAAGTGATTTATGTTACCACGAAACAATGATTTGTTGACTTTTAATTGGTTGT  
TTGTGGATTCTGTTTGAAAAGCCATGTAATTGTTCAAATTATATTCTACGTACTATTTCCTTCAAACTT  
AATCTCGTGCCATTTGTTTCAGGCCCCGCATGGCCAACTAGGTTAAGGGCGTTTCGACTTGTAATCTGAGG  
GTCGCGGATTTCAATCCCCGCTGTACCAAAACATGCTCGCCCTTTCAGCCATGAGGGCGCTATAATATGAC  
GGTCAATCTCACTATTTGTCTGGTAAAAGAGTAGCCTAAGAGTTGGCGGTGAGTGAGGATGACTAGCTGCC  
TTCCCTCTAGTCTTACACTGCTAAGTTAGGTGCGGATAGCGCAGGTATCCCTCGAGTAGATTTGCAAAAT  
TAAAAAAACAACAACAAGCGCCTATCTTTTCAACAGACCACCTTAACGTTGACATGCGTTGTATGCTGAT  
TGTCTTTTCGCGGAATATGCTTTGCCTTATGATCTAACAAATTAGAACCCTTCCTTTAAACATTCAACTTAC  
GGACGTGATTTGTTGAACTTTTAAGGTTATGTTTGACGAGGTTTGGTTTTGTTTTTATTTAGCTATATCA  
GGAATATCTGCGCTACTTATCTCTAATTTAGCACTGCAAGTCTAGAAGGAAGGCAGCTAGTCATCACTAT  
CCGCCGCCAACTCTTGGGCTACTCTTTTACCAACGAATAGTGAGATTGACCGTCACATTAGAACGCCCCC  
ACGGCTGAAAGGGCGAGCATGTTTGGTGTGAAGGGAGATCGAACCACGACCTTCGGATAAAGAGTCGAG  
TGCCTTAAGCCCCGTGCGTCATGTGCGGCCGTTTGAAGAGGTACGGAAGAAAGTTTCATTACAGTGCTA  
AAATATGTAACAAAACAGAAGGGAAGATTATAATTTGATAAAATAGCCGTGAGCTCCTGAAGTTATAAAGC  
GAATTTACCCGGTCGCCTGTAGTCTGTGAGCTGTGAGATTAAGGCCAGAGAGTGGGAACAAATGTTAGTG  
AAGGTAGGATCTTCATAAAGTCTTGAAAAGATGTTTCGAGTTATGTTGTCCATTAAGCAGCATAAAAAT

GCTTCAAACGTGTTGCCAGCTGTCAGATCAGAGGATTATGAGATTTGTGTTGAACGGGTTTATTATCAGT  
AGACAATCCCAGCTAATTCCTCAGGATTATAAGGAATCCAGGCGCCACTGTCCATTGGAAAAATCGCTT  
TTGTAAGAAGGACTACATTTTAACTAAAACCTATGCCCTTGATGGAACCTGAAAAATTTTGCTGAGTGTTTC  
AAAGTCGTTAGCGTAACCTTACTGAAAATCGCGTTAATTTATTTTTGCTTACATAAACATTTGAACCACT  
GGATGGTTCTATTTACGATATTTTATAAGCCCAGGATAAATGTACAAGTCGTTTTAGTAAATTTATAATG  
GAGTGAAAGTTATTAGCAGAAGCAATACATTATGTAAAGTTAATTAATCAGTTAGTTATTTTAAAAATCT  
AACTTGTAAAAAAGAAAAACCTATTGTCTTGATGAAGGAACATCAAATCCACATCTTCCAATAAATGG  
TTCTTAAACAATTGTTTCTGGTATAAAAGTACCTGAAGACAACCATCGCTGGCTAAGTCTTCGGATTTAC  
AGAACCAAAATCGGAGTCCAGTTCCCGTCGGTGACATTGCAGATAGCCTGACGTGGCTGAGCACGAAAT  
TCAGACAGACAGACAAAAGATACAATGTATGATGGCCAATGACAAATAAGAATAAATCTGATTCATGAAG  
TGGGCGTAATCTATAAATCTGATTCATGAAGTGGGTGTAATTTATAAAACAAATATAATAGTACAGAAAA  
ACTTTATTGTGAAGAAAGTATTAAATATATCCTGCTGAGACTATTATCTACGGAGTTTTCTATAATCCAC  
TTCTCTACACGAAAAGTAACGCGTGTTATTGTGAACATGAAGACCTCCTGCGGTATTCTATTAGTGTGAT  
AACCTCTAGGCTCTAACTACTCAGGAGGGCCTTCGTCGGGCTCTTTAGGAGGAAGGGGGATGAAATCTC  
GTGCAACGTTTAAAGCTAAGCAACTAGATCTATACGCTCTTTATAGAATAAATGCTACTTGTATTAGAA  
CCATTACCAGAGCTTTATATGCCAGGTAGGCCTAACTGACTGACAGATTTTCAAGTGTGATTATTGAAGAG  
CCACTCAAAATCGTCGGACACATCACACGTATAAATGACACGAGCGTTATTTTTTTGGTTAGAATTAAGA  
AACTTGTCTGTCTTTTGTAACTTAAGGCTACAATTTTTGTGTCAGCCAGATTCTGAGATTTCTTCTCAGA  
TTCTTTAACTGAAAGGCACGTGAGTGTATCTGTAGAACTGGCATTGGTGTGTTGTCGTTTGTACGCTT  
GCCCTCCCTTCTCGGAAGGGGCAACATGGGTTTTCAAGTGCCAAAACCAATCACTAATTTCTGTTTGC  
AACCACGTTTCATAGCTTCCAGACTTGCTTCAACACTAGTGGATTTTTCTAATACAACACGACTAATGCC  
ATTCTGTCGGTGGGTCTGTCTCTATAAAATCAGTTTTTTAGGGGAAGGGGGCTTATTAAATAAAAGT  
TGTTTTTAAAACCATTAAGACATTTAAGTTAATCAAGTATTTTTTTTCGTGAGATTTGTCGTAAACGAGT  
TCTATGAGTTAGTTTTTATAAGCCAACAGCTGTTGTTTTACGTGGCGTCGAGTGTAGCAGTTTATTATAT  
TCCACGTATCTAAAAGTTATATGTTACGAGGCTTACCATTGGTCCTCTGTAAATTTCTGCTCTATTCTA  
TATAAAAAACGTTATAAATAATACAGATTACTTTTTCTTTTTTAATTACAAATTTCTGTTTCATCTGTTT  
TTGTTTTTGGTTGTATGGAGCTATATTTTATTTTGATAAAAATCAAGAACCCTGTGTTTCTTAGGTTG  
TTTTTTTTTGCAGTTTGTCAAGCGGACATGACATTAATACATAGCCAAAAGCTTAAGAATACAAGGTTGA  
ATTATTTAACCATTGGGGTTTATTAATAGAACATTACATTATATCAAGTTCTATGATATACCCAGGAAGG  
TTTCTTCCCTCGATACAGTAAAAACTGTACAACCTTATATATGTATACACTTGTTTTTAAATTTTTGTAT  
TTGAAGCTAATTTTAAAATACATTGAATTATAGTTAAATATAGTTTCAAGTTACATAATTATTCTTTATT  
TAATTCCTTAATAGTAATTTTATATATTTTACTTTAAATAGGCTCGATAGACGCGACATCTGATGGAAA  
TTCTGAAAACAATTCCTCTGCAGACGAGGATTCACAGTTGCGCATGCGCTTGAAACGAAAACCTCCAAAGA  
AATCGGACATCTTTCACAAACGAACAAATCGAAGCTTTAGAAAAGCGTAAAGTCTACGATTCACAATTTT  
ATTTTGAAATCTTTATATTTAAGGTGTTAGATAAAATACTTCTTGTCAATTTAATGGAAAATGTCGTTTT  
TAGTGATAAAATACAGAACTTTCCTGTCTTTTGATAGTTTATGCAACTGGAGTCACGTAACCTAACATTAA  
TCATACAACCTATTTTCAGAGTTGAAAGAACAACACTATCCAGATGTTTTTGCAAGAGAAAGACTGGCTGAA  
AAGATATCTCTTCCCTGAAGCCCGTATTCAGGTAAGTTTACTATAAAAGGCATGGCTAATAATTGAATACT  
GTAATGTGGTGAGACACACATGCATTATAAATGAACGTTTCAATAAATGCAGAGCATAATGAATACCAAA  
ATACTTGTGTATTTGTTTGTGTTTTTCAATTTTCGCGCAAATCTACACGAGGGCTATCTGCGCTAGCT  
GTCCCTAATTTAGCAGGTAAGACTAGTGAGAAGGAAGTTAGTCATCACCACCCACCGCCAACTCTTGCG  
CTATTCTTTACCAACGAATAGTGGGATTAACCGTAACATTATAACGCCCCCATGGCTGAAAGGGCGAGC  
ATGTTTGGTACGACGGGGATTGAAACCCACGCCACTCAGATGACGAGTCGAAAGCCTTAACCTCACCTGGC  
CATGCCGTGCCATATTTCTCTGTACATTATTGTGCACTTTTATCTTAATATTTTAGAAGTAAATGAAT  
GTTACTAATGAAAATGTTAAGTACTTGTACTATTGGCACACATTTTTCTCTAACTACGCTCGAATTAGG  
GACTTTGTGTTTTATGCGATTGCTAGCAGTGATGATGTATGGACTATATAGTCTTACAAAGTAACTATG  
CGTGTGTGTTTGTGTTTCATACGTTTTCTATGAAAACGATTGACCAAGAAACCGAATGAGATGACTCG  
TTTTATAAGTAGGATATATAGGTGACAAAGAGTAAATGAATGTGTATATCTTTTGTGACTCACGGATT  
TACTGTAGAGAACTTCGTAACCAACCAGGCCGACAGCCACACGTATTCTGTTGAATAAGCAGTTCCTAA

AAACGGATATCAAAAGCAAGTACCTCGTGGACAGTAACATTTGGTAACACAATTATATTCTTGTTAAGCT  
ATTAAATTTGCCAAGAAAATCTTAGTTCCAGCGTGTTTTAAAGTAATTTTACTGACAATTACTGTGTTTCG  
AAACTACACTGCGATTAATAAAATATTAACGTGAACCACGAAGTCGAGCAATCGCTGAGTAGAAATGATG  
TCCCGTACCAAGAATTACAGTGATAGGACTTGTTGAATCAGTAAACTCATGTTAGGAACTCTGATTATGA  
TTTTATACAGCCTTGTGCAAAATAATTGAAACAAGACCGAAAAATTACGATTTTTAAATTTTTTTTTTGC  
GTTTTATTTCTGAGAATCCAAAAATTATTCACAAATTAATACATTATATGACCGCCTTTATTTTGTAAAT  
GACTCGTCCTGGCCAAGCGCGTTAAGGCGTGTGACTCGTAATCCGAGGGTCGCGCCAAACATGCACGCCC  
TTTCAGTCGTGGGAGCGTTATAATGTGACGGTCAATCTCACTATTCGTTGATAAAAAGTAGCCCAAGAGT  
TGGCGGTGGGTGGCGATGATTAAGTGCCTTCTCTCTAGTCTTACGCTGCTAAATTAGGGACGACTAGCAC  
AGATAGCCCTCGAGTAGCTTTGTGTGAAATTCCAAAAAATTTGTAAATTCTGTTCTAACATTGTATGAG  
AAAAAATTAAGACCTTGCTCCTCTCTAAGTTATCAAAGTCTTCCGTTGCAATCTATTTTTGATCTTGGTT  
TCTTTTTTAGTTTGAATTAAGCAAGAAGCTCAAAGTTGGTTACATGTGCTCTGCCATCACGGGTATCGA  
ACCTTTGTTTTTATCGATGGGAGTCGATACCTGTGATACCACTGTACCCCTAGAAGACTTTTATTTTC  
CATCCAAATACAACGTTACACGTGACTCATCTATCGCCTAACGGTGACCAGCAAGTATCACAGTTTAATA  
ATACACTAAAAATCTGGTTTCGATACCCCTCGGTGAGCAGAACTAAGGATATCCATTGTGTAACTTTGTTC  
TTGAAATAAAATTTGTACTAAATGTAAGTGTAAACTTCAGAATTACTCTCATTATATTTGTTAAAAATGA  
CATCACTGATTATTTCTATTATACCTAATTTATTTGTTTTTACACATTCAACAGTAACCTGGAATGTTTA  
ATATTTACCAAAGTAATTTGCTTACGACACACATTTTTTTTTTTTAGGTATGGTTTTTCGAACCGTCGCGCC  
AAATGGCGCGGAGAAGAAAAAGCTGCGAAACCAGCGACGAGTGATTGAACAACCAGCTTGTACGCTATGC  
TATCGCCACCTAACGGACGACTACCAATAAATGGATCCTTCTACAATTCCTTGTATCCTGCGTTAGCACA  
ACCTATGGGCGGGATGGGAGATTCTTACAGGTATGTTGGATCAAACCTGGTGTTTTTTCACTTTAATCATAA  
TACGTTAATCCGAAAATTAATGTGGATTGTGAGAAAAATAATTTATTTTTCTGGATACGCAAGAAGTCA  
CACGAGAACATTTCTCACTACCATATTTGTTTGTGTTTGTGTTTGAATTTTCGCGCAAACCACACGAGGGCTA  
TCTGCGTTAGCCGTCCCTAATTTAGCAGTGCAAGACTAGAGAGAAGGCAACTAGTCATCATCAACCCACCG  
CCAACCTCTCAGACTACTCTTTTATCAAAAAATAGTGGGATTGGCCTTCACGTTATAGCGCCCCACGGCT  
GAAAGGACGAATATGTTTGGTGCACCGGGATTGCAAAACGCAACCCTCAGAATCCGAGTCGAACGTCTT  
AACCCACTTGGCCATGCCGGGCTCAACTATTATGAATAACCTTGTAAATTTTGTAAAGCTACATTGACC  
TATATTTAATTTAGTGTTTTAATTTGTTTCCAATAAGTCAGTCAGAAAACATTAAGTCAAACCTAGATTT  
CATCTGCCAAACTGAAGTTTAAAGTTATAACGACATAAATAAACTGTTGCTGGGAGCTGTAATTTCAAA  
AGCATGTTTTGATGTGCAGTTTCGTTGTAGGAATAGAAATATCACGTGCAGTTTATTTTTGTGCCATTTTCG  
GCCATCAACAATACTTATGCAATATAACCACATGAATTGTACTATTGTTTAAACCCAGAAACAATATTT  
ATGTATTTGTAACTTTACAATTTATTCAATTGTAAGTCAATGACTCTCTTCTTCGTTGATTATTAACAAT  
CTGTACTAGCAAAACCTAATGTAAAAGTTGTACACTAGAGGGAAGGCAGCTAGCTAATATCACCAACAGT  
CGACTCTCAGGCTAGTTTTTTTTTAGCCAACAAATAGTGGGATTAGCCGTCATATTATATCACCTCCACT  
GATGAAAGGGCTAGCATGTTTCGAACTATCAACCTACAGATAACTAGCGCCGTAATGACCGCGCCAAAT  
GAGGAGTGAACCATGACAAGCTTATTGTTTCTTTTCGTAGTTTCGCTCAACAAAAACAAAAACA  
TAGCGGTAGTTATGAAGTTAGAACTGTTAATTAATAAATGGGTGCGGCATGGCCAGGCGGTTAAGG  
AAATCGACTCGTATATTCAAAGGTCTCGGGTTTCAATTTCCGTCACACCAAACACGCTCGCCCTTTCAGC  
CGTGTGAGCATTATAAGGTAACGACCAATCCCACTATTTCGTTGGTAAAAGTTGGCGGTGGGTAGTGATGA  
TTAGTTGCTCTCCCTCTAGTCTTGCCTACTAAATTAGGGCCGGCTAACGCAGATAGCTCTCGTGTAGCC  
TTGCGCGAAATTCAGAAACAAACAAACATTAGCAAAAAATAATGTGTTGTTTAAACGTTTTACAGTGTTC  
CTCCAGCATCTAGCATGGCGTCGAACCATTTGTCTACAGCAACGTGATCCCTCGCCCTACACCTACATGTT  
CCATGATCCGCTCACTCTGGGATCGTACTCTCGGCCTTCTTGTACACCGAGTCAACCAATTAATGGACAC  
CCATCTTATTCTGTTAGCAGCAGCAGTCCACATGGAGCAGGTAAGTAAACGATTTAGATGTGCACGTGTA  
CAGCAACACATGTGGTCACCTACTAACGATTAATAAAGAAAGTCTGTTTTTGAAGGAGCTTGGATTCCA  
TAATCCATCTTTGGCAAGAGAATTACAATCCCCAGAAGTTAGTTCAACAGTCTGATCACACAGACACCC  
CGTGAATCTATAGCCATTTGACTGACATTTTCTTTGTGTAGAACATAAAAAACACAACCTGCTACTTAAGAT  
AAGAAATGGTTTAATGGGAGATATTACGGGAATTTTTATCTGTGGGGAACACATCAATTATTATCCTTGT  
TACTAGATGGAGATCCTTCTTGATTATGTTTCGGTATTGTTTTCTGGATCACGTAAACGGTTTCTACTACG

AACTTTTGTATGAGTTTCATCTGCTACAAGATCTTTACTAACTGTGGTTGAGGCACGATTTCTTTCAA  
GCACCATAGTCTTAAAAACCCGAGTTGATCCACATTTGTTGTTTTAGAAATGACAAATCCATGTATGAA  
TGCATCCGTATCATCTGGGTTTAATGTTTTGTGACAGAAAAGACTGTTAGAAACCTATACCAAAGCGAT  
CAGCTCCCAATGTCATAAAATCCCTCAATGTCAAACGTAGCTCTGACATATTCTGTCCATCGCGACAT  
CATATCAGTTGATGTCAGCTTGCGATTTGTTGATTTGTTTATTCGAAATAGTTTTAACATAACGTTAACT  
TAATCTTGTATGATCCATTAGTGTATAACTTCATATTTTTTTTTTTATCGTTTTAGGAGTAATTTCTCCA  
GGCGTAACAGTTCCTCTCCAGGTTCCAAGCCAAGGTCCTGATCTCACAATGGCTCCAAATTACTGGCATC  
GTATACAGTGACAACAAGCCTGCAACAGAGAACTATAAGTTGTCTGTACCTTTACATGGTGAATCTGG  
TTCTAGGAAGATTTGAAACCCAAAAAGAAATCAACCCTGAAAAGTACATCAAGTGTATGTTAGTATCTAT
