# Supplementary material for: Evolutionary Conservation and Diversification of Five Pax6 Homologs in the Horseshoe Crab Species Cluster
Source: MDPI journal article supplement (doi:10.3390/arthropoda2010007), 2024-03-04
Supplement: s1 [file s1]

>Lpol\_ey1\_XP\_022246899

MPHKDFDPCRPGPLLQSSVSDPGHSGINQLGGIYVNGRPLPDSTRQKIVELAHSGARPCDISRI  
LQVSNGCVSKILGRYYETGSIRPRAIGGSKPRVATPPVVNKIAQYKRECPSIFAWEIRDRLSDG  
ICNNDNVPSVSSINRVLRLNLAQKEQQVHAQAQDAVYDKLRILNGQGWP RP NPWYPGSATFG  
GITSACVPPPVTAPSLPTENGQIQKKEGDSGTESSSRSDPGGSGDEDNAARLRLKRKLQRNRT  
SFTPEQIEALEKEFERTHYPDV FARERLAAKIDLPEARIAVSVQVWFSNRRAKWRREEKLRNQ  
RRAAEQAAAAAANTAPARLPLNAGFPNALYPSIGQPMASMTDTYSSIPPMSTYSMSNNMGPSS  
CLQQQAPSYS CMLPPGSARSYDPLSLGYSRPSCTAQPYVMQPVNGQFHTVNNASAGSTG  
LISGLSVPVQVPAQTGELNMSSAYWPRIQ

>Crot\_Ey1\_IMCBchromosome2

MPHKDFDPCRPGPLRQSSVSDPGHSGINQLGGIYVNGRPLPDSTRQKIVELAHSGARPCDISRI  
LQVSNGCVSKILGRYYETGSIRPRAIGGSKPRVATPPVVNKIAQYKRECPSIFAWEIRDRLSEGI  
CNNDNVPSVSSINRVLRLNLAQKEQQVHAQAQDAVYDKLRILNGQGWP RP NPWYPGSATFG  
GITPACVPPPVTAPSLPTENGQIQKKEGDSGTESSSRSDPGGSSDEDNAARLRLKRKLQRNRT  
SFTPEQIEALEKEFERTHYPDV FARERLAAKIDLPEARIAVSVQVWFSNRRAKWRREEKLRNQ  
RRAAEQA A VAAVNTTPARLPLNAGFPNALYPSIGQPMASMTDTYSSIPPMSTYSMSNNMGPSS  
CLQQQAPSYS CMLPPGSARSYDPLSLGYSRPSCTAQPYVMQPVNGQFHTVNNGSAGSTG  
LISGLSVPVQVPAQTGELNMSSAYWPRIQ

>Tgig\_Ey1\_IMCBchromosome1

MPHKDFDPCRPGPLRQSSVSDPGHSGINQLGGIYVNGRPLPDSTRQKIVELAHSGARPCDISRI  
LQVSNGCVSKILGRYYETGSIRPRAIGGSKPRVATPPVVNKIAQYKRECPSIFAWEIRDRLSEGI  
CNNDNVPSVSSINRVLRLNLAQKEQQVHAQAQDAVYDKLRILNGQGWP RP NPWYPGSATFG  
GITPACVPPPVTAPSLPTENGQIQKKEGDSGTESSSRSDPGGSSDEDNAARLRLKRKLQRNRT  
SFTPEQIEALEKEFERTHYPDV FARERLAAKIDLPEARIAVSVQVWFSNRRAKWRREEKLRNQ  
RRAAEQA A VAAVNTTPARLPLNAGFPNALYPSIGQPMASMTDTYSSIPPMSTYSMSNNMGPSS  
CLQQQAPSYS CMLPPGSARSYDPLSLGYSRPSCTAQPYVMQPVNGQFHTVNNGSAGSTG  
LISGLSVPVQVPAQTGELNMSSAYWPRIQ

>Ttri\_Ey1\_BBG1scaffold1573

MPHKDFDPCRPGPLRQSSVSDPGHSGINQLGGIYVNGRPLPDSTRQKIVELAHSGARPCDISRI  
LQVSNGCVSKILGRYYETGSIRPRAIGGSKPRVATPPVVNKIAQYKRECPSIFAWEIRDRLSEGI  
CNNDNVPSVSSINRVLRLNLAQKEQQVHAQAQDAVYDKLRILNGQGWP RP NPWYPGSATFG  
GITPACVPPPVTAPSLPTENGQIQKKEGDSGTESSSRSDPGGSSDEDNAARLRLKRKLQRNRT  
SFTPEQIEALEKEFERTHYPDV FARERLAAKIDLPEARIAVSVQVWFSNRRAKWRREEKLRNQ  
RRAAEQA A VAAVNTTPARLPLNAGFPNALYPSIGQPMASMTDTYSSIPPMSTYSMSNNMGPSS  
CLQQQAPSYS CMLPPGSARSYDPLSLGYSRPSCTAQPYVMQPVNGQFHTVNNGSAGSTG  
LISGLSVPVQVPAQTGELNMSSAYWPRIQ

>Lpol\_ey2\_XP\_022239031

MPHKDFDPCRPGPLRQSSITDPGHSGINQLGGIYVNGRPLPDSTRQKIVELAHSGARPCDISRI  
LQVSNGCVSKILGRYYETGSIRPRAIGGSKPRVATPSVAKIAHYKRECPSIFAWEIRDRLSDG  
VCNNDNVPSVSSINRVLRLNLAQKEQQAQDTVYDKLRLLNGQAWWP RP NPWYPGSATFGGITP

ACIPPPITASGHHSNNGVQKKEGDSGNDSSSRSDPGGSGDEDNEARLRLKRKLQRNRTSFT  
PEQIEALEKEFERTHYPDVFARERLAAKIDLPEARIQALSVQVWFSNRRRAKWRREEKLRNQRR  
VAEQAAVAAAAANSTPARLSLNSGFPNALYPGIGQPMASMTDSYSSIPPMSTYSMSNNMAPSS  
CLQQQTPTSYSCLPSGSGSARNYDPLSLGSYGRPSCPTAQPYVMQPINGQFATVNNGSAGSTGL  
ISPGLSVPVQVPSQPGELNMSTAYWPRIQ

>Crot\_Ey2\_IMCBchromosome11

MPHKDFDPCRPGPLCQSSITDPGHSGINQLGGIYVNGRPLPDSTRQKIVELAHSGARPCDISRI  
LQVSNGCVSKILGRYYETGSIRPRAIGGSKPRVATPPVVAKIAHYKRECPSIFAWAIRDRLSDG  
VCSNDNVPSVSSINRVLRLNLAKEQQAQDTVYDKLRLLNGQGWP RP NPWYPGSATFGGITP  
ACIPPPITVSGLPDSGQVQKKEGGSVHDSSSRSDPGVSGDEENEARLRLKRKLQRNRTSFTF  
EQIEALEKEFERTHYPDVFARERLAAKIDLPEARIQALSVQVWFSNRRRAKWRREEKLRNQRRV  
AEQAAVAAAAANSAPTRLSLNSGFPNSLYPGIGQPMASMTDSYNSIPPMSTYSMSNNMAPSS  
CLQQQTPTSYSCLPSGNARNYDALSLGTYSRPSCTAQPYVMQPVNSQFATVSSGSAGSTGL  
ISPGLSVPVQVPSQPGELNMSTAYWPRIQ

>Tgig\_Ey2\_IMCBchromosome4

MPHKDFDPCRDPDLRQSSIADPGHSGINQLGGIYVNGRPLPDSTRQKIVELAHSGARPCDISRI  
LQVSNGCVSKILGRYYETGSIRPRAIGGSKPRVATPPVVAKIAHYKRECPSIFAWAIRDRLSDG  
VCSNDNVPSVSSINRVLRLNLAKEQQTQDTVYDKLRLLNGQGWP RP NPWYPGSATFGGITP  
ACIPPPITVSGLPDSGQVQKKEGDSVHDSSSRSDPGGSGDEENEARLRLKRKLQRNRTSFTF  
EQIEALEKEFERTHYPDVFARERLAAKIDLPEARIQALSVQVWFSNRRRAKWRREEKLRNQRRV  
AEQAAVAAAAANSAPTRLSLNSGFPNSLYPGIGQPMASMTDSYNSIPPMSTYSMSNNIAPSSC  
LQQQTPTSYSCLPSGSGSARNYDALSLGTYSRPSCTAQPYVMQPVNSQFATVNNGSAGSTGLI  
SPGLSVPVQVPSQPSELNMSTAYWPRIQ

>Tri\_Ey2\_BBG1scaffold3997

MPHKDFDPCRPGPLRQSSIADPGHSGINQLGGIYVNGRPLPDSTRQKIVELAHSGARPCDISRI  
LQVSNGCVSKILGRYYETGSIRPRAIGGSKPRVATPPVVAKIAHYKRECPSIFAWAIRDRLSDG  
VCSNDNVPSVSSINRVLRLNLAKEQQAQDTVYDKLRLLNGQGWP RP NPWYPGSATFGGITP  
TCIPPPITVSGLPDSGQVQKKEGGSVHDSSSRSDPGGSGDEENEARLRLKRKLQRNRTSFTF  
EQIEALEKEFERTHYPDVFARERLAAKIDLPEARIQALSVQVWFSNRRRAKWRREEKLRNQRRV  
AEQAAVAAAAANSAPTRLSLNSGFPNSLYPGIGQPMASMTDSYNSIPPMSTYSMSNNMAPSS  
CLQQQTPTSYSCLPSGSGSARNYDALSLGTYSRPSCTAQPYVMQPVNSQFATVNNGSAGSTG  
LISPGLSVPLQVPSQPGELNMSTAYWPRIQ

>Lpol\_ey3\_XP\_013784383\_022252542

MLLFPPGHSGINQLGGIYVNGRPLPDSTRQKIVELAHSGARPCDISRILQVSNGCVSKILGRYYE  
TGSIRPRAIGGSKPRVATPDVVSNIQYKRECPSIFAWAIRDRLSDGICTNDNVPSVSSINRVL  
RNLAQKEQHVAQDAVYDKLRMLNGQGWP RP NPWYPASATFGGITPACVPPPVTVPLST  
ENGPIQKKEGDSGTESSSRSDPGGSGDDEENARLRLKRKLQRNRTSFTPEQIEALEKEFERT  
HYPDVFARERLASKIDLPEARIQVWFSNRRRAKWRREEKLRNQRRRAAEQAAAAAAVNTTPGRL  
PLNSGFPNSLYPGIGQPMASMGDSYSSIPPMSTYSMPNNMAPNSCLQQQASSYSCLPPGSA

RSYDHLSLSSYSRPSCTAQPYVMQPVNGQFSTVNNGGAGSTGLISPGLSVPVQVPGQPGL  
NMSSAYWPRIQ

>Crot\_Ey3\_IMCBchromosome7

MLLFPPGHSGINQLGGIYVNGRPLPDSTRQKIVELAHSGARPCDISRILQVSNGCVSKILGRYYE  
TGSIRPRAIGGSKPRVATPDVVSNIAQYKRECPSIFAWEIRDRLSDGICTNDNVPSVSSINRVL  
RNLAQKEQHVAQAQDAVYDKLRMLNGQGWP RP NPWYPASATFGGLTPACVPPPVTVPGL  
STENGPIQKKEGDSGTESSSRSDPGGSGDDEENAA RLRLKRKLQRNRTSFTPEQIEALEKEFE  
RTHYPDV FARERLASKIDLPEARIQVWFSNRRAKWRREEKLRNQRRAAEQAAA AVNNTPGRL  
PLNSGF PNSLYPGIGQPMASMGDSYSSIPPMSTYSMPNNMAPTSCLQQQASSYSCMLPPGSA  
RSYDHLSLTSYSRPSCPPAQPYVMQPVNGQFSAVNNGGTGSTGLISPGLSVPVQVPGQPADL  
NMSSAYWPRIQ

>Tgig\_Ey3\_IMCBchromosome4

MLLFPPGHSGINQLGGIYVNGRPLPDSTRQKIVELAHSGARPCDISRILQVSNGCVSKILGRYYE  
TGSIRPRAIGGSKPRVATPDVVSNIAQYKRECPSIFAWEIRDRLSDGICTNDNVPSVSSINRVL  
RNLAQKEQHVAQAQDAVYDKLRMLNGQGWP RP NPWYPASATFGGLTPACVPPPVTVPGL  
STENGPIQKKEGDSGTESSSRSDPGGSGDDEENAA RLRLKRKLQRNRTSFTPEQIEALEKEFE  
RTHYPDV FARERLASKIDLPEARIQVWFSNRRAKWRREEKLRNQRRAAEQAAA AVNNTPGRL  
PLNSGF PNSLYPGIGQPMASMGDSYSSIPPMSTYSMPNNMAPTSCLQQQASSYSCMLPPGST  
RSYDHLSLTSYSRPSCTAQPYVMQPVNGQFSTVNNGGTGSTGLISPGLSVPVQVPGQPADL  
NMSSAYWPRIQ

>Ttri\_Ey3\_BBG1scaffold2275

MLLFPPGHSGINQLGGIYVNGRPLPDSTRQKIVELAHSGARPCDISRILQVSNGCVSKILGRYYE  
TGSIRPRAIGGSKPRVATPDVVSNIAQYKRECPSIFAWEIRDRLSDGICTNDNVPSVSSINRVL  
RNLAQKEQHVAQAQDAVYDKLRMLNGQGWP RP NPWYPASATFGGLTPACVPPPVTVPGL  
STENGPIQKKEGDSGTESSSRSDPGGSGDDEENAA RLRLKRKLQRNRTSFTPEQIEALEKEFE  
RTHYPDV FARERLASKIDLPEARIQVWFSNRRAKWRREEKLRNQRRAAEQAAA AVNNTPGRL  
PLNSGF PNSLYPGIGQPMASMGDSYSSIPPMSTYSMPNNMAPTSCLQQQASSYSCMLPPGSA  
RSYDHLSLTSYSRPSCTAQPYVMQPVNGQFSTVNNGGTGSTGLISPGLSVPVQVPGQPADL  
NMTSAYWPRIQ

>Lpol\_toy1\_XP\_013792934

MPHKGHSGVNQLGGVYVNGRPLPDSTRQKIVELAHSGARPCDISRILQVSNGCVSKILGRYYE  
TGSIKPRTIGGSKPRVATSAVVNKIADYKRECPSVFAWEIRDRLADGVCNSENIPSVSSINRVL  
RNLT SQKDQQEPSPHHVPMTGPESVYDKLRLLNGSQPWPWYPTGPTHFHFHGIPPTSSPVALG  
QNAGLVGPVHGGNGHPSLAACESHQRDHP SVKKDSIDATSDGENSENNSSADEDSQLRMRLK  
RKLQRNRTSFTNEQIEALEKEFERTHYPDVFARERLAEKITLPEARIQVWFSNRRAKWRREEKL  
RNQRRVVEQPTGTTVLAPPNGRLPINGTFYNSMYP SLGQPMGGMGDSYSMPSSSMTSNHC  
LQQRDPTSYTYMFHDPLSLGSYSRSSCTPSQSINGHPSYSVNGGNAHGAGVISPGVTVP LQVP  
SQGPDLSMATNYWHRIQ

>Crot\_Toy1\_Sc28yqQ4222

MPHKGHSGVNQLGGVYVNGRPLPDSTRQKIVELAHSGARPCDISRILQVSNGCVSKILGRYYETGSIKPR  
TIGGSKPRVATSTVVNKIADYKRECPSVFAWEIRDRLADGVCNSENVP SVSSINRVL RNLT SQKDQQET  
SPHHVPMTGPESVYDKLRLLNGSQPWPWYPTGPSHHFHFHGIPPTSSSVALGQNAGLMGPGHGGNSHLG  
LSACESHQRDHP SVKKDSIDATSDGENSENNSSADEDSQLRMRLKRKLQRNRTSFTNEQIEALEK  
EFERTHYPDVFARERLAEKVTLPEARIQVWFSNRRAKWRREEKL RNQRRAVEQPTGTTVLAP  
PNGRLPINGTFYNSMYP SLGQPMAGMGDSYSVPPPSSIAPNHCVQQRDPTSYTYMFHDLGSY  
SRSSCTPSQSINGHPSYSVNGGSAHGAGVISPGVTVP LQVPSQGPDL SMATNYWHRIQ

>Tgig\_Toy1\_IMCBchromosome6

MPHKGHSGVNQLGGVYVNGRPLPDSTRQKIVELAHSGARPCDISRILQVSNGCVSKILGRYYE  
TGSIKPRTIGGSKPRVATSTVVNKIADYKRECPSVFAWEIRDRLADGVCNSENVP SVSSINRVL  
RNLT SQKDQQETSPHHVPMTGPESVYDKLRLLNGSQPWPWYPTGPSHHFHFHGIPPTSSPVALG  
QNAGLMGPGHGGNSHLGLAACESHQRDHP SVKKDSIDATSDGENSENNSSADEDSQLRMRLK  
RKLQRNRTSFTNEQIEALEKEFERTHYPDVFARERLAEKVTLPEARIQVWFSNRRAKWRREEK  
LRNQRRVVEQPTGTTVLAPPNGRLPINGTFYNSMYP SLGQPMAGMGDSYSVPPPSSIAPNHCV  
QQRDPTSYTYMFHDLGSYSRSSCTPSQSINGHPSYSVNGGSTHGAGVISPGVTVP LQVPSQG  
PDLSMATNYWHRIQ

>Ttri\_Toy1\_BBG1scaffold1101

MPHKGHSGVNQLGGVYVNGRPLPDSTRQKIVELAHSGARPCDISRILQVSNGCVSKILGRYYE  
TGSIKPRTIGGSKPRVATSTVVNKIADYKRECPSVFAWEIRDRLADGVCNSENVP SVSSINRVL  
RNLT SQKDQQETSPHHVPMTGPESVYDKLRLLNGSQPWPWYPTGPSHHFHFHGIPPTSSPVALG  
QNAGLMGPGHGGNSHLGLAACESHQRDHP RVKKDSIDATSDGENSENNSSADEDSQLRMRLK  
RKLQRNRTSFTNEQIEALEKEFERTHYPDVFARERLAEKVTLPEARIQVWFSNRRAKWRREEK  
LRNQRRVVEQPTGTTVLAPPNGRLPINGTFYNSMYP SLGQPMAGMGDSYSVPPPSSIAPNHC  
VQQRDPTSYTYMFHDLGSYSRSSCTPSQSINGHPSYSVNGGSTHGAGVISPGVTVP LQVPSQ  
GPDLSMATNYWHRIQ

>Lpol\_toy2\_XP\_022240121

MPHKSHSGVNQLGGMYVNGRPLPDSTRQKIVELAHSGARPCDISRILQVSNGCVSKILGRYYE  
TGSIKPRTIGGSKPRVATAAVVNRIADYKRECPSIFAWEMRDRLLADGVCNSENIPSVSSINRVL

RNLSAQKDHHQSSPQVPMTGPESVYDKLRMLNGAQWPWPWYPTGTSHHFHGVPPPSSPVTLG  
PNTGLGGSVPIVNGHSSLGSCDSHRHDHMSVTKKDSIDATSDGNSENNSSADEDSQLRMRLK  
RKLQRNRTSFTNEQIEALEKEFERTHYPDVFARERLAEKISLPEARIQVWF SNRRAKWRREEKL  
RNQRRVIEQPACTSMLSPPNGRLPINGSFYNSMYP SLAQPLGGMGDSYSVPPASSVASNHCL  
QQRDPSSYTYMFHDQLTLGSYSRPSCTPSQPINGHASYSVSASSPHGAGVISPGVTVPLQVPS  
QGPDLSMATNYWHRIQ

>Crot\_Toy2\_IMCBchromosome1

MPHKGHSGVNQLGGMVYVNGRPLPDSTRQKIVELAHSGARPCDISRILQVSNGCVSKILGRYYE  
TGSIKPRTIGGSKPRVATAAVVNRIADYKRECPSIFAWEMRDRLLVEGVCNSENIPSVSSINRVL  
RNLSSQKDLHRTSPQVSMAGPETVYDKLRMLNGTQPWPWPWYPTGTSHHFHGVPPPSSPVTLG  
PNTGLGGSVPIGNGHSSIGSCETNRHDHVNVTKKGSIDATSDGNSENNSSADEDSQLRMRLK  
RKLQRNRTSFTNEQIEALEKEFERTHYPDVFARERLAEKISLPEARIQVWF SNRRAKWRREEKL  
RNQRRVIEQPACTSMLSPPNGRLPINGSFYNSLYPALAQPMGGMGDSYSVPPASSMASNHCL  
QQRDPSPYTYMFHDPLTLGSYSRPSCTPSQPINGHPSYSVSTSSPHGAGVISPGVTVPLQVPS  
QGPDLTMAPNYWHRIQ

>Tgig\_Toy2\_IMCBchromosome2

MPHKGHSGVNQLGGMVYVNGRPLPDSTRQKIVELAHSGARPCDISRILQVSNGCVSKILGRYYE  
TGSIKPRTIGGSKPRVATAAVVNRIADYKRECPSIFAWEMRDRLLVEGVCNSENIPSVSSINRVL  
RNLSSQKDPHRTSPQVSVGGPESVYDKLRMLNGAQWPWPWYPTGTSHHFHGVPPPSSPVTLG  
PNTGLGGSVPIGNGHSSLGVCESNRHDHNMVTKKGSIDATSDGNSENNSSADEDSQLRMRLK  
RKLQRNRTSFTNEQIEALEKEFERTHYPDVFARERLAEKISLPEARIQVWF SNRRAKWRREEKL  
RNQRRVIEQPCTCTSMLSPPNGRLPINGSFYNSMYPALAQPMGGMGDSYSVPPVSSMASNHCL  
QQRDPSSYTYMFHDPLTLGSYSRPSCTPSQPINGHPSYSVSTSSPHGAGVISPGVTVPLQVPS  
QGPDLTMATNYWHRIQ

>Ttri\_Toy2\_BBG1scaffold627665

MPHKGHSGVNQLGGMVYVNGRPLPDSTRQKIVELAHSGARPCDISRILQVSNGCVSKILGRYYE  
TGSIKPRTIGGSKPRVATAAVVNRIADYKRECPSIFAWEMRDRLLVEGVCNSENIPSVSSINRVL  
RNLSSQKDPHRTSPQVSMAGPETVYDKLRMLNGAQWPWPWYPTATSHHFHGVPPPSSPVTLG  
PNTGLGVSVPIGNGHSSLGSCESNRHDHMHVTKKGSIDATSDGNSENNSSADEDSQLRMRLK  
RKLQRNRTSFTNEQIEALEKEFERTHYPDVFARERLAEKISLPEARIQVWF SNRRAKWRREEKL  
RNQRRVIEQPACTSMLSPPNGRLPINGSFYNSMYPALAQPMGGMGDSYSVPPVSSMASNHCL  
QQRDPSSYTYMFHDPITLGSYSRPSCTPSQPINGHPSYSVSTSSPHGAGVISPGVTVPLQVPS  
QGPDLSMTTNYWHRIQ
