# Supplementary material for: Evolutionary Conservation and Diversification of Five Pax6 Homologs in the Horseshoe Crab Species Cluster
Source: MDPI journal article supplement (doi:10.3390/arthropoda2010007), 2024-03-04
Supplement: s1 [file s1]

>CM024341.1:96661988-96715957 Tachypleus gigas isolate IMCB\_SINCHF\_001  
chromosome 4, whole genome shotgun sequence

CACGTGGGGACTAGCTAGGCCTAATTTTCGGTCGCTGTGGCTTTTTTCGAGTTAAGAATTTTAAAAAGAG  
ATGCCACATAAAGGTAAAAAGAACAACAGTTGCATAGATTTGTTTTCTTTATAGAGTTAAGCTTAATGTGA  
ATTGAATTTTCGTAGACCATGCTTCAAAACGACAATCGTTTAATGAAATACAGAATTTACCGATATTGAAT  
GGAACGTCCTTTATCACCGATAACCTAAAAAATCACTTGTTTGACAAATTATTGCTGTGCTTACAGAGATT  
TTTTTCCCTAATTTTGATAAAAACAAACGTGAAAACGTATTTTCGTCCTTAAACACGGAATAAAGTATT  
TGTATTATTTCAGAGTAATTTTCACATGTTTCCCTGCTTAACAGAAAAATTAAAAGAAATAAACAGATACAT  
AGAAAAGATGATTTATTTGTTTGTGTTTAAAGTTTCGCGCAGAGCCACACGAGGGCTATCTGCGCTTGCCGC  
CTCTAATTTTAGCAGTGTAAGACTAGAGGGAAGGCTGCTAGTTATCACCACCCACTGTAAATTTCTGGGCT  
ACTCTTTTACCAACGAATAGTGGGATTGACAGTCACATTATAATAACCCACGACTGAAAGAGTGAACAT  
GTTTGTGTCGACGAGTATTTCGAACCCCCGATCCTCAAATTAAGAGTCGAGTGCCTTAACCACCCGCGCA  
AAGGAGATTTACGCTGAGGATTATAATACAAGAATTTCCATTAATTTCTGAATTTATCTAATTAATTATG  
TGAATCTGGAACCCACTGCTTTGGTCTTCTCAACATGATTTTCTTGAAGCTAGTTTTAAGTTTGTTA  
TTTCTTTTGTGTTGCTGCTCTTCATCCATATTGGTTACAAAGAAAAACAACAACACGAAAAACATAAT  
TTTTCTTTTCGCGAACTTTAATTACATCGGTTTGTAAACCAATAAGAATAACAATTTTGTCTTTTACCG  
AAAATGTTTTCAAAAAGTGAGAAATGCAAAAACCACAGAGTTTCTCGTACTTTATAAGCTATGAAGCAGG  
TACTTGACGAAAGGAAATTCCTGTAAGTTTACATGGTCAGATGAACTAAATTTAAGACCATCAGTTTCAC  
TTTAAACCTTGTTAAGTTTGCTTTTCTTCTAACGACCAGTTTCAAACACCTGCGTCATCTACAGTTATA  
CAGATATAGATTTAAAGCTTATATGCATATATAAAAGTTTCAGAGAGACCTCGATATTTAGGGACAAGTA  
ACTAATTCGTGCTATAGGGTAAACATGTATATGTGTGTGTGTTTGAATGTTATGTGTGGATGTGGCCT  
TTCTCAACATTGTCATTATTAGATTAGTATGGATGGCGTTTAGAACGCTGTTCCAACGTACTTCTATAC  
ATTAATTCATCTGAATCTTTTCAAATATTTTAAACCCACTTGGGTTTAAACCTGTAGAAAAAGAACTGA  
AATACTGTCCATATTTCACCAGGTGAATTCGTAGTGTGTATTAGTTTTTTGAAGTATCTCTGTCCGCAG  
GTAACAGTTATAACGTTAAAGGTCGTTTTCTTCCATCCACTCAACAACAATAAGAGAGTTCATTCTTA  
ATTGGATTTAAGGAAATATTAAGCTCTGGAATTTGTTAGCGGTGTTTTGTCTGAAACATTTCTCCTCTA  
TACATCTTCTCTAATAGGGTATGTAATTCGGTTCTGGATAACTTAGCGATAAAGCATATTGCAACCTAT  
CATTACAATGTTGTTTACTGGAACGTTTACCACCCCCTTCTTACTGCGCGTGCTTCTGGGAGAGCTATG  
ATCACCCTATGTGCCCAAATCAGTTTTCTGCAAGTACGATCTCAGTGCGCGGTTCTTCTCGAGGCTTAT  
GTCTCGTGCTCTCGTGAAGGACTATCATTAAATGGGTATTCACGCCACTGAAGGTAAGAATTAACAAA  
TCAGAAGGAAAGGTCAAGCTTTCCAGTCAATTTCAATTAATGGACAGAAGGATAAAGTTTTTTTCAGCCAA  
GATTGTTTAAATAGACAGAAGAATAGAACTACCTTTACAGCCAAGTCTGTTTAAATGGACAGAATGATAGGA  
TTAACTCATTCAATAAACAGAAGGATAAGACTGAGTTTTTCAGTCGTGTCTGTTTAAACGAACAGAAGATAG  
GACTAAGTTTCCAGTCATGTATATTAAATGAACAAAATATTTGGACTAGTCTCTAGCTATGTTTCGTTTAT  
TTATAAAACGGGATAGAATTACCTTTCCAATTATGTGCGTTTAAATGGACAGAGTGACAGGACTAGTTTTT  
CTAGGCGTTAAGTCCATTTAATGAGAGAGTAGAAAAAGACTATCTTTCCAGTCAGGTGTGTTAATCAAA  
TATATTCTAAATGAAAAAGAAATATATAAATGTATATAACAATACATTTGAATGAACAGTTTAAATCGCTTG  
TTTTACTTTACGGTTATTTTTTGCTTATCTGTAAAACGTAGTTGTTGAATTTTGAAAACGTATGAAAACT  
TTAATCACGAGGAACGAAAAACGAACTCAAGAATTACAAAAAAAATTGAAATTGATTAATGTCTCATTT  
TAATTCAGTATAAAATAATCTAGTTTCCCCAAACAACAAAACCCATTAATATTTGTTCTATTAATTTAG  
TCTATTTATTCAAAACAGCTTATTTTCTTAAACATGTTCAAACACTTTAACTAAAGTAATAGTTTTTGCC  
TTCCTTGTAAGAGTTTCATACTCTTCTAGACAAACATAGATCAAACTTTTATGTTTCAACATATCATGTT  
CACTGAAGTACGATTATGCTGTGATTAGGTAGATAGACACATATAATTCTATTGTTTTTGTCTTACGTACT  
AAACACATGTACTTAAATCTATGCATTTATGTATCTTATTTTATATAGCGAAAAATACGTGCAACCATA  
TTTCGTTTACTTGAATTACAAGGCAGCAACATTTTATAACCATTTATATTTTATTTTCACTATAGTTTGT  
AAACTACGATTTAAATTAACCACATTAATGTATATTGCGCGGTTACAATGTAGCAGTTTCCCCCAAGTAT  
AATTTTATATATATATATTTAGAAAAATCAACATTGAAAATGGCATTTATTTAAAGATTTTTTAAAGTGCTG  
CAGGTTATGAGCTATTGCTCGTAAACAGTCAATATTATTACGTGAGTTATATCTAGCTAGAAGAACTTTA  
AGCCGTTTGTTCATATATTTTTACTTTTTATTGTGCTTCACGTCACCCCGATCAAACCTGAACCTTCTTTTC

TTTAAAGTTGAATAGTTTCCAAAAGATTGGAACGGGATAGGTCTCAACACGGGATAGGTGACAACACTTCA  
TGCTACTAATGGTGTATCTTCCAGAAATTTAAAAAAGTAAATTAAAATGCTTTTTTTTAAACCAGATTTT  
AAAAC TAGTTTAGTTAAATTATCAATTTTAAACAACCTAAATCATATCTCAGTATATATTAAATTCATCA  
CTGTTATTGCAAAACAGATACGTGAACGATCGGTTGAAAGTTCTATTTGTAGGTATAACCCAGATAACAA  
TACTGACTTTTTTATGTGCAATAACTCATAACCCGTGTCATTTATAATAACCTTTAACAAATGATTGTTTA  
AAATAAATGTCAC TTTATTAATGTTTATAATTTGATTTTGAGGATTGATATTGCTCCTCATTTTCGTAGA  
CGTACGTTCAAAGATAACCAAATCAGTCTTAAGTTTGGATCATCTTTAAAAGTTTGTGTGTTGAATTTTCGC  
ACAAAGCTACGCAAGGGCTATCTGTGCTAGCTGTCCGTTATTTATTAATATAAGATAAGAGGGAAGGCAG  
CTAGTTATCACCACCCACCGCCAACCTCTTTGGCTACTCTTTACCAATGAATAGTGGGATTGAACGTTAC  
ATTATAACGCCCCACAGCTGAAAGGGCGAACACGTTTGGTGCACGGGGATTCTATCCCGCGACTCTTA  
GATTACGAGTCGAATGCCTTAACCACTGTGCTTATCTTAGAAAGACGCAATGAATAATAATTATCTCTAA  
GCTGACATTTTCGTTTCATGAATGAATATCTCTAACAAACAATGTGCTGCAATAAGGAGGCTCTGTAATCT  
AACACCTAGTTTCATCAGGAAAGATCTTTAAACTCACAATATCTTTCAAGAACAAAGTTTTGTAACTTAA  
TTCGGTATCTAAAGCGAAGTTCGTTTTGTGTGAACACTCAGTTTTAAACAAGATAGCTCTCTAAACTAAC  
TTTCGATTTCAAAAATGAAGCTCTCTAACTTAACATGTTACAGGATACTTGAAAACAATGTTCTACTACA  
TATCTAAATAACTTTTTCTTTTTATGGAGAGTAGTATGTGCTTGTACCATATTTTTATTCAGCAATGATA  
ATGAGTGTAATTAACATATTAGTGTATAAGATATTGTAAGGAATAATGAACACTTTTCGGACTAATGACG  
TTTGCAGTAACTGTATTTAAAAATATCTTGATAAAACAATGACAACAACATATATCGAACATTTTCTGTGAC  
AGTTTGTGAAACATTCTGACCCAATATTATCTTTACAGTCACTCCTAACCACGTAACAATGTCAATCTCT  
GTTTAATATCAGCTACTAATTCATTCACTGCCAGAGGTATATATATATATATATGTTTCCCTCTGGATT  
ACTCCAATAAAATTTTGTGCTACTATTACGAAATGATGTTTCATTTCAAAACATTATCAGTTTCATCATTC  
ATATAACTGAAATATTGAAACATATGGAATTTTGTTTTTTTAGTTTGTATATATATAAATGAACCTGGGA  
CTGGAAAATTTTTTTATATCTAATAGGGTCATTAAAAAACTTTAAAATGTTACTGACACACTCAAGTGA  
CACACATATTTTCTATGCGGTTTTGTGTCAGTGTTTTGATTCACTTTCCATTTGCTTCAAGATAAGTATTT  
TCTTTGCTTATTTATAATTTTCACAACTTCAGTATTTTGATATTTATGTCTTAATATGTATATCTAGCT  
CTTGTTGGACCCCTTTGTTGCCGTTAGATTAATGTAATATCTTCATGGATATTTTGTTAGATAATTAACAG  
TATTAACCTGTATACTTTAACTCATTTTTTTATTAATCATTAGTTTAGTTATTAATAGTTGAATGACTGAA  
TAAATAGTTTGTTTTCACCACATTTCGTAATTTAACACATAATAGGTTTTTTTAACTACGTCAGAACTAGG  
TATGTATTATGAATAATTAAATAATTAGGAAAGAATGAAAAACGAAATAAAGGAAAGACTTATCCAAGTA  
TTTTTTAGCATAATGTAACGGCAAGATGGTCCCTAGATATTATTGAACGTGATTAAATATTAGATTATCATA  
ATTATAGCTTTTTCACGAAATTAATGAGACGGGTTGTGTTTGGAGGCTTAACCTGTGTAATGTACATGAT  
TACTGGCAGAAAGGCTAAGCGTACAGTGAGATAACCTAGTTAGAGCGAATAGGCGAAACAGATATATATT  
TTAATTTACTGGCTGTTTCGTTAAGTAGAAAGAAAAACATAATTGAGACATTTTGTGCTGTATACCTT  
ATAGATTTTTGACCCGTGTCGTCTGATCCACTCCGCCAGTCGTCTATCGCTGATCCAGGTTAGTTGGATG  
ATAACATCTATCTTTCTTAAGATTGTATGAAATATGCAGTTGAAATAATGTGATTGACAATCCCTCACTT  
AACAAACGTTGGATCCGTCTTATAAAGTTTGTTTACCTTGTATTTAACTATTTAAAATTTATAACACGTG  
AGGTTAAGGTTATGAAAATAGCAGTGGCTGTCTGAAAGTTTAATAAACAGGTCTGCCACTTTTCGTAGAAC  
ACCAATATGGTGTGAAAATGTATGTTAAGCTATAGCTCTGTCTTCAAATATTTTTTACAACGTAAATTATC  
TTCTAAAGTCATTAGATTTGTTGTTGTTGTTGTTTGGATTAAGTACAAAGCTACACAATGGGCTCTCTGT  
GCTCTGCCCACCACGGGTATCGAAACCCGGATTTTAGCGTGTAAGTCTTCAGACATACCGCTGAGCCACT  
GGGGGGCAATTCATTAGAACTTGATGATATGTTTCAGTAATCATACGATATATTCTGCCTGTAGATTACA  
GAATTGCAGATATTTGAACTGAAATAGAATAAGGCTTGATAATCACTTTAGATACGTTCTGTTATTTCTT  
GTATTTTGATTGAGAGGATATACATACTAACATAAGGAACTTTCAATGTTTTGTAACATCGTTTATGAAG  
ATATCTCTAAAGAATTAAATAGTCAGACAGAAAAATGACTCAGTTTTTTCTGTTTTATCTAGTTTTGGAG  
TAAAGTGATAAAATAAATAAAAAATATTTCAATTGAATTCATTTTTTGTGTGAAGGTATTCACCTCTGAGC  
AAGATCAAGTTAACTAGTTTATGGCTTTTATACGTTATTATAGCATAACGAAAAATCTAATTTTGAACCTCT  
AAAGAGTTTTGATCAAGGTTTCGATAACATTGAACAAAATCCAGCATGACC'TGGTGGATTGAGGCACTCA  
ACTCGTAATCTGAGGGTCGTGGGTTTCGAATCTCTGTTACACAAGCATGATCGCCCTTTTCAGCCGTGGGGC  
GTTATAGCATGACGGTCAATCCAAATATTATTTCGGTAAAAGAATAACCCAAGATCTGAGGGTGGGTGGTG

ATGACTAGTTGCCTTTCTCTAGTCTGATACTACTAAATTAGGGACATATAACGCAGTCCCATATTAATT  
GTTATTCGGTGTTGAGTTACAATTTTACTGTTTTTGATAAAATTTATTTGAAGCATAATAGGTCTACTGG  
GACCAGTATATATATATATATATATCAAAACCATTTACAATCTATATAAATGTTATCATTAATCAGGGCAT  
ACGTTTAAAGTTCAGTTTAAAGGTTTGATGAGCATACCGTGGATGATGAATATAATACAGTTTACTTCGGA  
CTCGACTATATTTTTCCCGAAAGCTTTGTTTTATTTTTTGCAAAAAGAAAAAAAAGCATGATATAATT  
GTGTGTTTTGAATTTGCGACAAAGCTACTCGAGGGCTATCTGTGCTAGCCGTCCCTAATTTAGTAGTGTA  
AGACTAGAGAGAAGGCAGCTAGTCATCACTACCTACCGCCAATTCTTGGGCTACTCTTTTACCAACGAAT  
ATTGGAATTGACTGTAACATTATAACGTCCCCATGGCTGAAAGGACGAGCTTGTTTGGTGCGACCGGGAT  
CGAACCTGCGACCCTCGGATTACGAGTGAATGCCTTAACACACTTAGCCATGCCGGGCCCTCCGCATGAT  
ATAATATGAAAAAGAATCTCTTGAACGATTTAAAATCAGCATGTTTTTTTTTGACGAAAGTAACTGACT  
TCTGAAAACAGTCTTCTAAAATAGTTGTCAAGAGGTTTCCAGTTCAAAATGCTCATCACTCCAACTTTA  
AGAAAGCATGGTTTTGGTCATGATGACATAATAGGTTTTTGCTCTGTCGCTTTAGCCTAAAAATACTACA  
GTTGATTACTTATCAAACAATAAACTAATATGTCCTTGTTACCAGCTTCGTACCAAAAGTCCCTGAAAGGC  
TAGATTGATTATGCTTGAAAACTAAACCTTGATGACTTTGAAAACTTTTCTTCATTAATACTTTTGT  
TTCATTTAACGATGTTTAGAAATGAAAAATATGTTATACTTAAATATGAAATATGTTTGGTTTACCGCAA  
AACCACACATTTCTCATCTGGATTATAACCTCGCAACTCAATAAACTTCCCGTTTACCTTCTGAGGAACA  
GAGAGTGTGCTATAAGGTTAGATATTATTGGATAAAACCGTCAAATAATGCCATTTTTTTTTTAATAGT  
AACTCTGGATCAGCTGGATTAGGCTAGCGTGTTCAAGTGGCTATCGTGCTGGACCACAGACTCGTGGAAT  
CGTGATTACAGTCTCTTCCCGCTAAAAATATAACTATACATATATAAAACGACGATTAACGCGGTTATTC  
CTTGATGAGCTTTTCGCGAATATCCGAAAATAAAACAAATCACCTGATTTATAGATTTAACGAGACACAA  
TATATAATCTCTTTTAAGAAAGCCTCATAAGCTATAACAATTCCAATAAAGTAGGTGCGACAGGTAAATC  
CTGTAGGTAAAAATAAGATATCCTTCCCTCTATGAAGGTATTTCTCCTGCACCCATTGCCAACATTCGTG  
TTACAAATATAATAGGAGAAGCAACTTTCTCGCATGAAACAAGTAATTTGCTGAGTCTCGCCTCTAGA  
TTTCAGGACAAATATGTAAATAAAGAATCCTGGTTGATTATTTACATTTAAATTAATATGACAAGTGAA  
GCGCGAAGAAACCATGGAAGAGTGATCGTATAGTAGGTAAAAGTAGGGTATCCACTACATGTTTCGTGC  
TAAAAGCTTTTTTTTAAATACATTATAAGGTTTCGAGATTTTCAAAGATCAGGAAGCCAAGGATTTTCA  
CTTAGTTGTGTGCTGCAGTTGTAGAGTTTATAGCGTTTATAAAACGTTCTTCAATATTCGAAAGTTTTAA  
ACTTGCATATTCGTAATGGTTTATTGATTATTTCTGGCGTTTAAACATGCTTACGATTCTTTAAATAG  
AATCAACAGATAAGCCTACTTATACAGTTACAAACATTATCACATACACGCGTAATTAGCTTGTGAGTGT  
GGCTTTATCCTGCAACAAGGAAACAGCCCAGTTTACTCTATAACTTTGTAAGTACACACTGGCTGTGCTT  
CCTGGTGTTCTAATGGTAATAATGAGTTTGTGTTGTTTTGATTTTTTGGATTTTCGCACAAAGCTACTTGAG  
CGCTATCTGTGCTAGCCGTTCTTAATTTAGCAGTGTAAGACTAGAGAAAAAGCAGCTAGTCATCACCACC  
TACCGCCAACAATGTAAAGTGTTAATATCCCATACAAGCCGTTCTGAGATACATTTGTATTTCAAGTGG  
ATTTCTCGTAATCAAGAAATTACAGTTCGATTCTTGATGTGGGCCATCGCAGATAGTTCATATTTGGGA  
TTTTGTTTTTATTTTAAAAAATATAGAATTTGCATCATAAATTTAACTTAATAGGCTTGCAGGTAATTA  
AACAATATGTAGGTGCGCTGTATTTTAAACCTAAACTACTGATAGCGGTCCAACCTGGGAAATTACCATC  
TGCAATATTTTCAAAGAACTCCATCTTCAACTAAACATGCATGAGGAAACCATTACACGTTTCCTATA  
TTCCCTCTATTCTATAAGAAAGACCATTATGGGAGAAATACTGAACTGACAGTAAGAAAGGATGAAGCTG  
TATGAAAAGAGAAATATAACCATTTAATATCTGATGAACTGTGGTGGTACTTCGGTTGGTCATAAACCGA  
AGAGCGAAACAATCGAGGATCTTTGGAATCGAAATAACTGTAGCAATTTTTCCACAACCAATGGCACGTG  
ACAAATTTAATCAGATTTTCAAGATACCGTCTATTTGATTATGCTGAAAAGGAACAAAAAGATGAAACAAAG  
AACAAATTTTTTACACTAAAAATATCGTTTCCAGTAGATGGGTTTCAAGATACTCCGGTGTGTTATTTCTGTA  
TTAAAAACGGGTAAATGGTTTTCAAACGAGACCTAAACTCGAGCACTTCTGAATAATTTACTATTCAGG  
AGAATAAGGAAGAAAAATAGTGATTTATTTGAAAGTACTCAAGTTTTGGGTTTGAAAGCTATTGTAACCT  
TCGTGTGACTCCGTGCGTTAACTTCTCAATTAAAACCAAAAAACGTGCTCATTAGGAGAAACTATTAACA  
TTCCGTGACAAGTGCTTGTTCAAATAATAAATGTATTCCAAAAAACATGGTGATGAATATAATATCAAAA  
CTTGGACTTACTGGGTTAGTGACACATCCAAGTTTATAACATGTAAATTTATAAGAATAACTTCCAAGAAA  
ACAAACTCAGGATAAGAAAGTGGTTCAACTGAACAATTATGTATACATATACGCGTGAGGATTTATGCC  
AAAATGAGCAAGACTATATACAGACAACAAGTGCTTATTTTTTAAACGAGTTAACTTATACACTAAAAACA

GTGTTATATTTTAAGAGTAGCTAATCTGCATAGCGTGCATACATACAAGTACGCTTGTTTTTATCTGAGG  
AAGCCTTTCCACACGTGCATGCACGCCATATTTTAAACCGAGCAAGCTTGTTTTATATGCACACAAATGTG  
CTGTAGTTTGTAGATTGAGAAAACCTGTATTATGTATATGAATACATAAATATATATAGTCGTGGTGTACGT  
TTTAATTGGTCAAGTCTGTACACAAAATACGTCTGCATTTGTTAACAAATAATCCTAGTAGACGCATAC  
GTGCTTCATGACTCTGTTTAGGAAAAGTCTTTATACTAAAGCGAGAGAGACCGATTTTCAGACATAAGTAC  
GTCTGATAAAAAGTAATATAGAAATGACAACGTGGTTCATATGTCATTGTAAAATTATGTAAGAAGTGGAC  
AATAATTAAATACGGCAATGTCAAGAAGAGTGGATATTCGAGAAATCCAGCTTCTATATCCTATGTATCC  
GTTTCGTGGGAACCTTATAGCTGTTGGTATTGGAGAAGGACAACCAGCGACCTCAGTAGGTTTGATGGCA  
CAGCCACGTCCACAATAGACCTAAGTACGTTGTGCTATTAGAAAGCAATGCCAGCTTTGATAAAAATAATA  
GCCTGCTTGGGCATAGAAAAATAATTAGACACACACTGGCATACATGCATGTTACAGAGGTAAAAAGCACG  
TGTTTTAGAGTAGCTATGGGAATATTTAAGTTGAGAGTCGATTAATCATCCTTTAATTTTCATGCAGTAAG  
TATACATACAAATATACATTCGGAGTGGGATGAAATATTGCCAGAAGACTAATTAAATATTGACATGAGT  
TTTTGTGTGTATAAAGACTTGAAGACTGGTGTATATTTGTATATACATATATTAACATGTGTACTTATC  
TGCTCAAATATACATACATATGCATATTGATATCTCTATGTAATATAGTACTTTTGTGTCAAAGAAAA  
ACCAAACACAAGTACACACTCTTCAGAGAAATTACACACCATCTTTTGATAAGTGCCTTTTATCTCGGTTT  
CCCGAAAGACTTCTGTGCACCGATCATTGATTGTTACTAAGTATATATACCTTAGTATAGGGAACATAGTG  
CCTTAAGCTAAAGTGATTTGAATCAAGTGAAGAGAAGCTTTGCGTATGTGTTTTATGTTTCTTGTTAGA  
GCACCTTGCTCTAGCAGGATTTATTTATATCTTTACATTAAGCCAACGTCTAAGGCAGACGTTTCAGAT  
GTTCAAGTACAGGCATCAGCACTTATAGAAACACTTAGACACTTAGTTATATGTAGCTTCAATATACTAT  
TTATTTCAAATATTTAAAAAATGCATATAAGATTAGCTACACAGTTATTTGTGCAATGAGGTTATTGCGA  
CTTCTACGAATATATGTGTTATTTTATAACTAGATGCTAATAGCAAAAATAAGACGAAGAAATCTCCTCAC  
ATAAAAATTGCTTAATTTCTTGGTCAACTTCGACTGTCCGTCACTCAGTTTACAAATAACACGTCCACTTC  
ATTAATTTTCATCTAAGAACTTTTCTCTCGCGAGGCCAATGAGAGCGTGGTTTGTGGAACAAGTGCTGTT  
GTTGTGAAAAAGACTACACAAGCACAGTGCACCTTGATTGAGAACGAGCAACTAACTACAATTAACAGCT  
GTTACTTTTACATAAAATTTCTCTTTTCAAGACGTTTAAACTATGTAGACATAATCTTACTAGCTTAGGA  
AGGGGCATTTATGATCAGTGTTCCATGCAGGTCACTATTCTTGAGGGGGGTATTCTTTCAAATAACATT  
ATGTAACATAAATTTTACTTTTTCTTGTTCTGGGCAGAAAGTGAATTTCCCAATTACTTATGTGAAAA  
GTAAATGTAAAAGACCTATTTTTCTCTTCAAACCTTTGCATTTGTGACCTGGGTAATGAAATTTTCAAATT  
CACCTATTTTCCAGATAATTCCAGGTAGATTGAGTGTGAGTAGCTGATACAGAATTTTCTCGAACTTAC  
AAGAATTTTCAAGAACGTGGTAGAACTTACGAGAATATTCAAGAACCTTTTATAACTTTCTAGAACTTTC  
CATAGTAATATATAAATACAGGGGCTTACCATTAATTATTTTCAAGTTTAGTTCTAGCTGCTTAAGTGAACA  
CATAGACCTATATGATTTTATCAGAGATGGCATCAAGAAGCTGCAAGCATTCTCCAGACGCATTCTGCTA  
TATATGTGGCCAAATTTATCAAGACAAGAGCGAAAAAATATTTTGTGACAGCATTGCTAAAAATATGTGAA  
GCGTACAAGGCATATTTCAGGCATGCCTATCGGGAATCAAGACAAACCTGGGGCACCTCATTTTATCAGC  
GAGCACTGCAAAAATACTCTAGAAGGTAAGACGGACAATGTTTGCTTGCTTGAATAGTAAGATTTTATAT  
TATACAAATTTTAGACTTTTTTAAATTTAAATATCTTTTAAATTTATTTATTTTAAATTTCCCAATAGTAGA  
GAAAAAATATCACATGTAAAAATATTTTGCATGATCCTCTTACACATTAGTTGTGGATGAAATAAATTTAT  
TCTTCATAATAATTTTATTTTGCTCTTTTGCAGGATGGTACAGAGGGGAAAAGAGAGCCATGATGTTATG  
CTATTCCAAGAATTTAGCGTGAACCCAATAACCACTGAAGCAGTTGCTACTTCTGCACCTAGAGGACCCCTT  
CCAAACGTGAGTTGGCAGGAATGCTTTTTGCTATCATGTATCCGGACTTCCCATCATCCATCGCTTCAGT  
GCTAAACTTCCCTGAGATCCCAGCATTCAATCCGCCAGAGAGAAAGTAGCCATCCTCAGAAGAGAGCAGC  
AAATCAGAAGAGGAGGTAGACGTTAAAGATCCAGATTATAATTTCAAGGTTGCAGCTGGTGAGAGAAACC  
CATACAACCCACCAAAGAGATCTCAAACCTTGATCAGAGATCTTGGTCTAACTAAAGTCTAATGCTGAGC  
TTTTGACTTCTAGGTTCAAAGAACGGGATTTGCTAGATTAAAGCGTGCAAGTCGCAAGTCAGAGAAAAGTA  
TAACCGACATTTTTCAAGCTTCTTCACTCGTCAAGATGGGTTCTGCTTCTGCCACAATGTATCCGGTCTG  
TAGAAAGGCGACTGAAATTGCCTGTAAACCGGAATAAGTATCTGTCTCTTTCCCTGGCTCATTCGGTGCACCTCA  
AAGAGGAATACAACAGCGTCAAGACCTTGATAGAAGCCTTGAAGTACAATGAGTATGGCTGGGGATCGGA  
GATTTCAAATGATAGCATTTCTGATGGGTCTTCAAGGAGGCTTTACCAAGTTTTCTGTTATCTTTGCC

TATGGGACATCAGGGACTATCGCAGCGCACTACAACAGGTGGCACTGGCCACAACGGACCGCGTTCTCTG  
TGGGGAGGCACAAATGTCAAGTATGAACCACTAGTGGACCTCCTAAAGGTGTTGTTCCCACTATTACACAT  
AAAATTTGGTCTTATGAATGGATTTGTTACAGCTCTTGATAAGGAGTCTGAAGCCATCAAGTGCCTTCGA  
GACTTATTCCTACGCTGTCTTAGGCAAATGTCAAAGCTAGCGTCTTCGTTGGACCACAAATAAAGAAGA  
TCCTGGAGTGCAAAGAATTCTCCAAGAGGCTCAGTAGGAAGGAAAAAATTGGGGCATGTTTGTTACAGT  
GGTTCCTGGGCTTCTTGGGCAATCACAAGGCCGAAAACTATGTGGAAC TTGTTGAGGTTCTGGTGAAGAAC  
TACGGCAAAATGGGCTGCAGGATGTCTCAGAGGAGCAAGGCGAGCGCTTCCACCAAGATATACTGGACTT  
TAAACGCCGCTACCAAGAAGCGTATAATAAAAAATATGATGGGAGTCTATATTTGGGGGCTGATACATGAA  
AGTGGTTTACATTACAGTCGCAAATCTCGAAAACTACTCACTTCTAAACAGTTTTGTATAATTTTAATA  
TAAATATATGTAAATCTTGATTTCATATGTTGTTTTATTTCAGACCTTATGTAAATGAAAATGTGCAAATTT  
GCCCCGTTTTTACAAAGAAAAATTTCTAAATTTTATTATCCAAGTCAAAAAGCAAAGTTTGAAGGGAATAA  
TGGCCATTTTTTTGTACTTTTACAACATAAGCAATTAAGAAATAACACATGCTATGCAGGAACAAAAATTG  
TATTACATAGTGCACGTACTGCATATAATCACTTCAATTGTAAAACGTAAATCGCGAAGCATTTCACTAG  
AAAGAAAAAGTTCAGTTGAAGGGGAGTGGACTGATTTTGAAATACATTATTTAATAGACTGATGCCACTG  
ATGCTTCTTCTATTTTAAGGTATCATAGTCTACAAGGTCAGTCACTTTACTGAATAGAAAAGATTTATGT  
TTCCATTTTCAGGGTATCATAGTCCATAAGGTCAGTCACTTTAATAAATAGATAAGATCTATGTTTCCATT  
TTAAGGTATCATAGTCTACAAGGTCAGTCACTTTACTGAATAGATAAGATCTATGTTTCCATTTTCAGGGTA  
TCATAGTCCATAAGGTCAGTCACTTTAATAAATAGATAAGATCTATGTTTCCATTATAAGGTATCATAGT  
CTACAAGGTCAGTCAAGTACTGAATAGATAAGATCTATGTTTCCATTTTCAGGGTATCATAGTTCATAAG  
GTAAATTGCTTTAATAAATAGATAAGATCTATGTTTCCATTTTCAGGGTATCATAGTTCATAAGGTAAATT  
GCTTTAATAAATAGATAAGATCTATGTTTCCATTTTAAGGTATCATATTCTACATGGTCAGTTACTTTTAC  
TAAATAGATAAGATCTATGTTTCCATTTTCAGGGTATCATATTCTACATGGTCAGTTACTTTACTAAATAG  
ATAAGATCTATGTTTCCATTTTCAGGGTATCATAGTCTACAAGGTCAGTCACTTTACCGAATAGATAAGAT  
CTATGTTTCCATTTTCAGGGTATCATAGTCTACAAGGTCAGTTGCTTTAATAAATAAATAAGATCTATGTT  
TCTATTTTAAGGTATCATAGTCTACAAGGCCAGTCTTTTAATAAATAGATAAGATCTATGTCTCCATTTTC  
AGGATATCATAGTCTACAAGTTCAGTCACTTTACTAAATAGATAAGATCTTTGTTTCCATTTTCATGGTAT  
CATAGTCCATAAGGTCAGTTGCTTTAATAAATAAATAAGATCTATGTTTCCATTTTAAGGTATCATAGTC  
TACAAGGTCAGTTACTTTACTAAATAGATAAAATCTATGTCTCCATTTTCAGGATATCATAGTCTACAAGG  
TCAGTCATTTTACTAAATAGATAAGATCTATGTCTCCATTTTCAGGATATCATAGTTCATAAGGTAAATTG  
CTTTAATAAATAGATAAGATCTATGTTTCCATTTTAAGGTATCATATTCTACATGGTCAGTTACTTTTACT  
AAATAGATAAGATCTATGTTTCCATTTTAAGGTATCATATTCTACATGGTCAGTTACTTTTACTAAATAGA  
TAAGATCTATGTTTCCATTTTCAGGGTATCGTAGTCTATAAGTTCAGTCGCTTTAATAAATAAATAAGATC  
TATGTTTCTATTTTAGGGTATCATAGTCTACAAGGTCAGTCACTTTACTGACGTTATTAAGTATCCATTG  
GGACAGATAATAAAGTTTCTTTAAATACTCAACAGAAAGTGTTTAATAACTATGTCTAAAGGCGATGACA  
CTTTTCCACTCACTGAAATCGTTTGAGTAATAAAATATTAATAATCCTTTTATCCATAACTGATAACTGAT  
GTGGGCAAAGCATTTAGAAATTAGTGACCTAAGTCAGTCGAAACTAAATTATGGCTACCTTTTGAAACAG  
AGAAAACACGTAGATAGATAGATACATGCATGATGCTGTGAATTTATTACTTGTAAATAATCTGTAAATTT  
AATCCACAAGTTTGTTCAGGATATAAATCGTGTTTACCTAGTTATTGTTACGCAATGGTATCTCATTCATG  
ATGCACCCTAGGTAGCACAGCGGTATGTCTACGGATTTACAACCCTAAAATTAGGGGTTCCGATTCCCCCTC  
AGTAGGCTCAGCAGATAGCCCCATGTAGCTTTGCTACAAGAAAAACACCCATATTCTCGGTAGGATCTGC  
ATTAATAAATGAAATTAGTCTTCTAATCTTGTTGTTACACTTTAAAAGAAAACATGTTAGGTTATAGAT  
ACGAAAGAGGCGAATAGTCTGTAATAATCTATAGTCACAAACCTATCATTTAAATAGTTTTAAAATAGAT  
TCTATAATTCCCAAAGCGAACAAATGCCGTAAATGTTAAAGTTAAAATAGGAAAGGACTCAGATATTCTA  
ATAATAAAAAACGATTGTTTGACTTATCTTCTTCACAGCGGAAAAGTCTAGCTTAATATGCGAAAGCG  
TTTATTCTTTAGAAAGTATTTGAGCTAACATTAACAATGTGCAAAAGAGACGTATGCGGTTTTATTCTTTAA  
AACTATTTGAGCTAATATTCACAACAGTGTGAAAGAGGCGTGTACGGTTTGTTTTCTTTACAATTTGTTG  
AGCTAACATTCATGCAGTAAATGAATGACCGATGTAGTTGAAAAGAGAAATATGTTGTCCATTTTAGAAG  
AGATAACCCGTTGTTCTTAAACAGAGATAAGCTGTTTGTGTTTGCAATAATAACCTGTTTGCTTTAACAGAA  
ATAGCCTTCTTGTTTTTATGACGATAACCTTTTTGACTTAATAGACAATCTAAGAGAGTGACGAAAAAAT

ACCAACAGACACCAAGGTACACGAGTTTTAAATGGATGGCGTTTACTAGCCGTCTTCAATTTAACCAACC  
AGTTCAAATTTAGAAACAGTTTTTTTTATTAAATCCTTGTGTGAACTTTTGCGGTAAATAAAGAAGAGTTA  
AACTGATGGTTTTAATTGATATAATCCATTAATTTTGATAATTATAGTCTGACTGTTTGTAGTAAAGATT  
TTGTTTGGTAATCATCTGCCTCGGTAGTAGGGCCCGGCATGGCTAAGCGTGTTAAGGAGTTCGATTTGTA  
GTCCGAGGGTTGCGGTTCGAATCCCGATCGCACCAACATGCTCGTCCTTTCAGCCGTGGGGTCGTTATA  
TTGTGACGGTCAATCCCACTATTTCGTTGATAAAAAGAGTAGCCCAAGAGTTAGCAGTGGGTGGTGATGACT  
AGCTGCCTTCTCTCTTGTCTTACACTGCTAAATTAGGGACGGCTAGCACAGATAACCCCTCTAGTTGCTTT  
GCGCGAAATTAACCAACCAACCAACCAACAGCCTAGGTAGTTACAAGCCCTTTAGATACGATATAGA  
TAAAAAATCTATTTATCAATCCAATACATAAAACAGTGGAATAATACATAGACAGGTGGTAGAGAT  
GGAAATCAAATATATTTTGTATTATAGTGTCTTTGGTTTTTATCGTGTTTTCTATTTTTGAGCAATTCGTG  
TAAATATTAGAGCAGAACACAATTTTATGTTGCCCTGTATATTTGCCGTCTTACAAATGAACTAAAACAA  
GAAAGTGTCTTTATTTAAAAATTGACCACAACCTTTGGATGTAATACCACACCCTTTTTATTCAACACCA  
CAACTTTTGGATGTAATACCACACCGTTTTTTATTCAACACCACAACTTTTTGGATGTAATACCACACCCTT  
TTTATTCAACACCACAACTTTTTGGATGTAATACCACACACTTTTTATTCAACACCACAACTTTTTGGATGT  
AATACTACACCGTTTTATTTTTAACAACACGATCCTTTGCGTGTAAGAGATGAATCCGGAAAAACTTG  
ATTTTTCGTAACATATAAAACAAATTAATATTTTTAATAGAATGATCTTCTTGTTTAGTGAATTTTATT  
TGTTTCAAAAAATAAGAAAAGAAAAACATACATGTTGCTCAATACATTGGTGAGTTTAGTTCTGATAGTT  
GCTTATTATCTTTTGATACTTGACGTTTCGTGTAGTAATGACATAATATTCTTACTTATTTTTCTGTTTCT  
ATTGTAAAAATTGAGGTTTCATGTATGTTTTCTCTGCAGGACACAGTGGTATAAACCAACTGGGAGGTATT  
TACGTCAACGGTCGACCACTGCCGGACTCCACTAGACAGAAGATCGTAGAACCTTGCTCACAGCGCGCGA  
GGCCCTGCGACATCTCCCGTATTCTTCAGGTTTCTAATGGTTGTGTTTCCAAGATTCTAGGCCGATATTA  
CGAAACCGGATCCATCCGGCCCCGAGCAATCGGGGGAAGCAAACCCCGTGTGGCCACACCGCCCGTGGTG  
GCCAAAATTGCTCATTACAAACGGGAATGTCCCTCCATCTTTGCCTGGGAGATTTCGAGATAGACTGTTGT  
CTGATGGAGTGTGCAGTAACGATAATGTTCTAGTGTAAAGTAACGTTAATCACCACCTCATAACGCTCTATT  
TCTATACAAACCTCCTCTCGACACGTCTCCGCTCACACTGAATCCCTCTCTGAAAACTTACGACAGTCT  
ACTACAGCAATTCGGCAAAATTTCACTGAAAATCTGGTTTTAATAAACAGACGCAATGTAACCAACATA  
TGATGTTATTGACACAAAAAGATAGAAGAATAAATAAACACGCATAAAAAATACACTGGCAGACAGATAT  
AAACAGACGGTAAAGATGGTTGATAAATTATTTTCTTTTCACTCTTCAGACATTTCAAAATCATCAGA  
AAGTCACATAATCAAGGTAGGAATCTGATAATAACTTTTTATTTTGATCTATATATTATTTTATACGCTTA  
TTAATATCAGAACATTCTATTCTCTCCCATGTTTTCTAATTAGGTAAGACCTATTATATTATTCACCTTT  
CTTCTTATGTACATATGTATTAACATATCCTTGACCTTTAATATATTTTGTAGTATTATCAACCCTTATG  
GTGAAGTTCTGTTGTTTTGTATGAGAGTTTAAACTGGTATAATTTTGTCTACGTTTTTCATTAACTCTT  
TATTGTGTTGTAGTTCAAAAGTTTGATATTTTTATCTATTATTTTTAAATCATTTAAGACATTTGCTTT  
TTGCTTTGAAGATATATTTTATAACCCTAGTAGTTTTTACATAAAATGTTAGATATCAGATAAAAGTTT  
AATCTGCTCTACTCAATCAATTGAACATGCCGTTATGCAACAGCGAAATACCAACCGTTTTGTTATTATC  
ACAATATCTGTTACCTTGACATGGCAAAATGATTTGTTATCACAATATCTGTTACCTTGGACATGGCAA  
AATGATTTGTTATCACAATATCTGTTCTTTTGAATACAATACAGAACTATGATAATATCACAATATTCGC  
TTTCTTGAAAAACGGCAATATTTTCCCTGGAACCAACACAATATAATAGTGTTTTTCACAATATCTCTTT  
CCTTGAAACACAAGATATCTTTCAATTATAACAGGAATATTTTTTCTTTCTAAAACCTTCGCTTTTCTTCT  
TTGATGATGCATTATTTAGAATTTAGTTTTAACCTATGTTCTTGAAGTACAAGTATTGGTAAAAACAAA  
GGTAAATATATATATATATATGTTGTTTTTAAACATAGTGTTAATGTTTGTGTCAGTTTCGTTAATATGATT  
TTTTTCTCATTGAGTGATGGTGGCGGTTTGTCTAGCGAAAAGCTACGTAATGTGCTATCCACGCTCT  
GCCACCACAAGAAATCGAACCAGGATTTTAAACGTTATAAACAGTAAAGTTGGTGCTTATCCATTGAGA  
AACATTTAATGGTGTATTATTGTCTGTATCATTCCATTATTTTGTACATTACCTTTTACCAGTATTTGGT  
ACTTTCAATTTGTTTACGACACTATACAATACTGGGCTGTGCAGAGGTTTCAAGAAATAGCCGTCCCTAAT  
TTGAAACTGTTGATTAGACGAAGATCAGATAGTGAACAGAATCACATCGCTTACACAGCTACTTTCAATT  
TGAACCAAACAGTGGAATAGAAATTTACTTTCAAACGAGATCACATATCTCGGGCGTTCCGATCTGCATC  
ACGGCCCTAAGTTTTACTACACAACAAAAGACAGTGTAAGAAAGTAATCAGTTTAATTACAGTGAAGGTT  
AAACAAAAGTAACACTTTAGAAGTAGGTACACATTATTTACTAATGCATATTGTATTGAAATCCAAATTT

ATTCCTCGTATGCCATCTATAAAACGCTGACGATTGTAATAAATAATACCATGTAGTTCGTTATCTGTT  
ACCATTATTCTAAACATTCAGATATGTAAAGCAGCCGCTTGAGGTTGCTGAGAGAACATGGATTTCCTGTG  
ACCTACAATTGCCGTAACTGTTGTGGATCGATGTATTGATGAAAGGATGCACTTCCACCATCTTCACAC  
ACTGAAGTAGTGAGGATGTATATACAGATCATGCTGGCTTCCTATTTATGGTCTTATTAGTATCACGTGA  
TTTATCATCCAACAATAAGCTAGTTTGTGGCGGTAAATGGAGAGGACACTCAGATTCTAGAGGCTAAGTA  
GCAATAAGGTAATTTTAACCACCACTTAACATTGTCTATTGGTTATTGTTATCGTAAACGGAAAGGTAG  
CGAACTATAGAAACACCGCCTTACAGACTGAAAATGTGAATTGTTACTTTTGTACGATATTATACGCATA  
CGAGTAAATCGCAATACCTATTAACATACTATTTGAATTGTTTTGTTTTCCCAATATTTTATAATTAATG  
TTAAATGTTATTACATTAGTAATCGTTAAGAAGTTATGTTTTTAATTCACGAAAATTAGTTTATAGTTG  
ATAGTTAATTTTAATGTAATAGGAAAACTTATTGTTTGCTGTTAAGTACAAAGCTACACGATGGACTATC  
TGTAGTTTTCTTACCCTATTTTCAAACCCAATTTTCTGAGTTATAAGATCGCAGAATTACGCCTGAGCC  
ACCGGTCAGCTATAGGAAAACCTAGTGTATATATTTAATTGGTTAATTAGAATATTTTTTAAAAATATT  
ACTTAGCATTTTCAACAAACCACAATTAATTCAACAAAAGAACTTACAGAATTATTTCTCAGAAAACT  
GGTGTTCCTAGCATCGTCACAATAGTTTGTGAGAGGCTCAAATCTAGGAATTCTCTAATGTAACCTTCA  
TTGCTGAAACACAATGTGAGTAAAGCCTTTCTTAATTTCACTATGATTTTTTTATATACGTGTTTTCTTC  
AGAATTTGTTTTACCAATAGGTGCATAAAACGTTTATATTTGTATGACATCAAAGCTTTTCGTAATAAAA  
ATAATATTTTTAAGTTTGTTTAAGCTTGTAGCGAAGTTATTACAGCAAGACGTAATGTTAGAAAAGTTAG  
AAAACAGACTAACAGGCATTGAGAACGTATAACTTAAAAGATAACCATAAACATACAACTTTTGATAACTT  
ATAAGACTATTTTATTAATATACACAATGATAACTAATTAGATAGCTATAAACATTCACGTTGATAATCT  
GTTAGATTGCCATAAACACAGGGCATTGATAACCTATAGTATAACTTCAAACATACAGCACTGATATTAT  
ATTAAATAACTATATATAATCGGCAATGATAACCTATTAGATAGCTATAAACATTCACGTTGATAATCT  
GTTAGATTGCATAAACACAGGGCATTGATAACCTATTGTATAACTTCAAACATACAGCACTGATATTATA  
TTAAATAACTATATATAATCGGCAATGATAACCTATTAGATAACTACAAACATAGGACACTGGCATCTTC  
TTACGCGCCCTGCATGGCCAGATGGTTAAGGCACCTTGACTCGTAATAGGAGAGTCGCGGGTTTGAACCCC  
CGTCACACTAAATATGCTAGCCCTTTTCAAGCGTGGGGACGTTATAATAGGATGGTCAATCCCACTATTTG  
TTGGCGGTGGATGGTGATGACTAGTTGTCTTACCTCTAATCTTATACTGTAAAATTAAGGACGGTTAGCG  
CAGATAGCCCTCGTGTAGCTTTGCACAAAATTCAAAAACAAACAAGTAGCTTTAAACATACGGCACTAGT  
AACACATTACATCACTATAAGCATATGATATTAAAATATATTTATAACTATAAACAAACGGTATTGATA  
ACTTATTGCACGGTTACAAAATAGAGCATTGTGAACCTAATGCGTCACCTCATACGGCATGATAACCTATC  
TCATGACTATAAACAAACAATAATGATAACCTATGATATAACTATAAACATACAGCATTGATAGCTATTA  
TACAGTTGCAAGACGTATATCCACGAGGTCTCTAAAAATATTATGGTTAAAGAATAAATAAACCAAGAT  
TAAGAGTAACAAACATTTATATTTCTTGCAATTTGAAGTTCTGATGTTATGCTCTGTCATAACCTACAGAG  
TTTATGATTCTTTTCGTGATTGATGGCATAACGACATTTTATTAACGTCACGACAGTACAAAATGTAAGA  
TTAATCATCCCTTATATCCCTTATATGACGTACTTTTAATGCCGACTGACTGACAGATAGCACACTACTG  
TATTCGGTGCGAGTGATTAATAACAGGTAAACCCCTCTAAGCAACCTTTGGCCTCCTTTTCGTGAAAAAAT  
AATTGAATTAATTTATAACAACAGTGATTTTCAATTAACGATTCATTAAATTAGAATTTTATAAATTACGGA  
ATAGTGCGCTTGATACGTACATAAGTTGAATAACTAAAATTATATATGGATTTATAACTGTACGAATAATG  
ATTAAGAGAAAAAGACGAGCAAAAACAAAGAAAAAAGCAACTGTGGGAAGCAGCATGTAATTTAATCATTG  
TAAACCATTTTAACTCAAACTCTTTCCTTCTTGGGTTTCTCATCAACAACTTTTACTGAATTTTCAAGAA  
CAATCAAACCTATGAAAACGAGGACATTATGAAGAACTTAATTACAGAGATCACATGATTTACACAATTAAC  
CGAAATGTGTTTCTGCACATACTGATATCGTTTTTATAGATTTTCGGAAGAGTTAACTCTGTATGGCTTGT  
CTGTATTGAGCATCTATTACAGCAGTGACGTAACCATTTGTATCTTTAGGTATAATAAATGCAACATTTAA  
TCATATTCTGAATGCCATCAGCTGGTTGGCGGTAAGTCACTAACAGACAATCATACTTTTCTTTCTTCTA  
CATACGTGAAAAAGCTACCCCGTTGTTGTTTCACTCTGGCTTTGATTAGGTAAATGTATTTAAAGTATAAAT  
TAAAAAACTGACTGTTTACAGACCAGATCTTTCCTCATACTGTTTTATCTCTGATCAGTTTAAAAACAGGA  
ATATTACAGTATATTTTACCTTGTCTTTTACATGCTTCTAGTTAAATAAACGCTATTTATTAGATCGA  
TTTTAGGATCTGGTTTATGTGATAATTTGCTTTGATCAGGACTTATTTTTTTTACTTCTTTCCGTGTCCAC  
GTTCTAATCTATAATAAGAAAAATTACAACATTAGCTTCACAACCTCTTTTAAGGTAGACAAGACCAGCTCT  
GAAAATCGTTCCTCATGTTATGTACTATGTAACATAAACTGTGATACTGCAGCATCGATCAAAAAAGAAG

TTTTTCTTAATAGAAACCAAGTTAGTTACTGATAGTTAATACTAACTATTAACGTGTTTAACGTATAATTA  
CTAACGCAATAAACCAACGAACCTGTCAGATTTAATTTGAATAAAAGCTCTTGGGACTCAGTAATATTTTTA  
CTGCATACAATTTATTTAATAATTTTCTGCAAATTAATAATTTAGTTCTTAAATATAGTTTATAATGTAT  
TCATTGGTTGAAACCTTAACCTGAATTAATTATTTTGCACAAACTTCCATCCAGTTAGTAAAAATGATCA  
TTTGTATTCGAGCAGTTAGTTACTGGATGAAACTAAATTACAGCCTCGCAGAAACATTCAACATCGCTA  
GTTTGTCCCTTAAGCCTAGGGATGAACGATTGACATCAATTTCTCTCGGTGCATGAACACGTGCGACTCTA  
TGAAGCTCATGTGGACCGAAGAAGGCTCTGGTCTGTCTCACGTCAATTGGTGTCCCTAACTTATACTTGAA  
AATGATAAAAAATGACCTAATAAATCCTACCAATTCCATATGTTTGGGCAATGTACTGAAGATAGCATGTA  
ATGATTATTTGGTACATTCGCAATGAATAATTCAAGACATATATATAGACATAGATATACATTTAGAATAA  
GTGAGAGGAGATTATATAATAGTTTGTTCCTTAACAGAATGTTAACGTAAGAAAGAAGTTTACTTCTTTA  
AAATGTTTTATTTTAACTAGTAAGTTTGTTCGATACGAATATCTGTGTTTGAGTAATTTTACTTTTTTC  
GACTAAATGATGGAACCTATGTTTTTGAACCTGTAAATGGATTTTTTCGCAGAGATTGACAAGACCAGACATC  
TCTTTGGTTTAGTTAGTCTCGTGAGTATAAACTACAAATCAATAACTATTAGCAGCATCTTATAAAAC  
CCTTTATTTGTTCCATAAAAGAAACTGTCTCGTTTCTTCGTGGTTAAATAATCAGCATTCTGTATTTTATT  
CATTTGGAACCGTTTACCATCTGCCCTTACCTTCTTTGATCATACTATTATTTTCTATAGAAAAGGAAGT  
GAACGCCACTTATCAACAATAAAATAACTTTAACAACCACGTTAGACTTAATCCTTTTTTGAATAAACTT  
TTTATATGACATGCAGTGAAACCTTTAGAGTACAAAAGTGTCTGGCTAGCTTCAAACATGGCCTCCCGTG  
GCGCTGAGAGGCATGAATTTGCTCAATCAAGGACTTCTGATTCTCCAACCTAAATTCAGAACGAGCATG  
AAGAAAAATGTGAGAGGTGGTAAATGTTTGTGGTTAGTTCTTCTTGGTATATTTACTGCATGTTGTATGT  
GTGTTTGATCTGGCTTCTTCAGTTTAGGAAACACAAGAAATACGAATGCCCATTCAGCAAAGAAATTCGG  
CCACTCTTGTTTTGTCAATGTCACTGAAGCGGATATGTTTACTTCAAATATGGAGATTTATATGCGCCA  
TTCAATGATACAGAAAACCTGGTTTAAAACGGTATGTGAAGATATATGTTTCGAAAATAATTTAATCATTTT  
ATAAAAAGTTAAATCAACCTGTAATGAAAACAGGCGAATTAGGCAATTGAAAGCAACGGTCAACTGAAA  
GGTAGGAAGGTGAAAAGGAAGCTTGGTAGCTTACCAAAGGGGAGATGAACAATAAACTTTAGAAAATATC  
ACCAGCTGTCTGACGACACCGACGTTACTTTGTAGCAAGGTGTTCAAACCTGAAAGCTCTGCCGCTACAGG  
CTCTGTGGTTTTGTTTCGTTTTGAATTTGATGCGAAGCTGCTCAAGAGTTATCTGCGCTAACCATTCCTAA  
TTTAGCAGTATAGAACTAGAAGAAAGGCAGCTAATCAGCATCACTCACCGCCAACCTCTTGGGTTACTCTT  
TTAACAACGAATAGTGGGATTGATCGTCACATTATAACGCCGCTACGGCTGAAAGACATGTTTGGTGCGA  
TGGAAATTCGAACCCATCTAGCCATACCGGGCAGAGGTCTGAGTTTCGGCCGCTTCGCCAAGTCATTTCTC  
TTGAACGCAACATCAGTAAATATCTTGACGTCCTTTTTACGTCCTTTTGAAGGAAGGCAGAAACAAAAAT  
GTAACCTCGTATGTTAGAGAGGCAGTTTGTGATAATAAACACAACAGTTCTGAAATTTATCTGATCCACT  
ATACACTGTGCGAGTATAAATTAATCGTTTTCAATGCAGCCGTGTTCTATCTGTATAGATCAATCTAAC  
TCTCTCTGTGTTTAAAGTTGGTACTATTACATTTATCCACAGCATCTTATCCACTTGTAGGTGTTAGAAC  
TTGATACATCTATCCGATACTGTCTTATGTATTTGTACGTGTTGGAACATTACATACATACACGAGGGT  
GCCTTATACACCTCCATATGTTTGAAGTATTACTTCTATCCTTTAAAGTATCTTACTCAACTGTTGGTAT  
TAAACCTCTCCGACAAATGTCTTCTGCACTTATATACATAGGAACATAACATCTATTCAATAAATAT  
CTTACCTACCTGTAAGTATTAGATATATTACATCAATCCAAGAAAGTGTTTTAATCACTTGTAGGTGTTG  
GAACTGATAAATAGCCTTACTCAAATATAGATGTTTGAACCTGTTACGTCTATTTTATAGTGTTTTAACTT  
ACTATAAAACAAAAAATTAATAAATTTAACTTACTTGTAGGTGTTGGAATCTTTTTTGTATCCAATA  
AGGTGTCATACTAGAATTTTGAACCTATTATATCTGTATCATAAAGTGTTTTATTACATATAGTTGTTG  
AAATTACTACGTTTATCTGATAACATATTATAATAAAATACAATTGTTTGAAGTATGATATCTATATGAT  
TGTGTCTTACAACCTTTAGCTGTTAGATGTATTACATCTGTCTGATAACGTTTCTGATCTAACAGTATAT  
CTTGGATTATTTTAAATCTATTTGATAAAGTGCTTACAACCTGTAGGTGTTGGAAGTATCATGTCTATAT  
TAAAAGGTACCTTCTTATAGATGTTAGAAATATTACATTAATTCTATGGAATCTTTTATCAGATATATAT  
ATTGAAGTCATTACATCCAGTTGATGGTGTCTTATCCATTTATAGGTTTTGAACCGCAACAATTAATAGG  
TAATGTTTTGGTCACTTGTAGATTATCACATTCACCAATGGAGTCTTACTTGTATAAAATATGTTAAAAAT  
TATTGCATCCAAAGGAGATAGTGAATTACTTACTAGTAGATGTTGGAACAATTCATTTATCATGTAATA  
TGTCTCACTTGAGTGTAGGTTTTGTAGCTATTACGTCTATCCAATAAAGTGCCTTACTAAGTGTTTCGAAC  
TATAACAGCTATCTGATAGTGTCTCCCTCGTTTGTAAAGCGTTGTAATTATTAAATCGTTTCAGTGAAGCA



TTTTATATATTAGTGTGGGTTGGAAGTATTATATCTAATCATGAAAGTTCCCACTTTTAGGTGCTGGAAA  
AGTTAAATTTATGCGATAAATGTCTTAACCACTTGTGGATATTAGAATTATTACATTTATTTAACAAAGT  
GTCTTTCTATAAATTGATATTGGAACCTCGTGCATATATCCAATGCCTTACCCACTTGTATGTATTGCAAC  
AATCACATCTACCTGATAGTGCCTTTAACTCTTATACGTGTTCAAACATAAAGTCTTTCTGAAACGTAC  
GTGTTTGAACATATTAGAATATATCCATAATGTCTTACGTACATACGTGTTAGAAGTATTATACGCATCC  
GATAGTTTTCACACAATATTGTAGGTACTGGAAGTATTACATCTTTTTCTGATAAAGTGTGGAATAAAATA  
TGTGTTTAAACTCATATTTATGTCATGATGTCTTACTTATGTGTAAGTGCTAAAAATATTACATTTATCC  
GATAAAGTGTGACATACAAATGAAACCGTTTGAACCATATGAATATCTTATACATTTGTAGGTGTTGAAA  
TTATTACATATTTCTGATAAAGTGACAAATTGAAATGTAAATGTGGGAACACTACATCTTTCCAAACAAA  
AGTACCCCCAGTTGGTACTAGGATCATTCAATCGTAGGTATTGTATTATTGTTATTATATCTATCCGATC  
GCTCGTAAGTTTCTGAACTATTACTTATTTCGATTAAGTTTTTCACTTTTTATTAAATGTAGCTGTTGCA  
ACTATCCTATAAAATCTCTTACTTTTAGGTGTTGGAACATATTGTATCTATGATATAGTGTTTTACACCTT  
TGAAGGTGTTTGAACCTATCTAATAAAGTGCTATACTAAAATGTAAGTGCTGGAATTATTATGTATATCT  
GATAGTGTCTTACAGATGTGTAGATTTTAAACTGTTCTATCTATTTATTAAAGTGTGTAACACACGTAC  
AGGTGGTAGAACGATTACATATATGCAAAAAAGTATTTTATATAAATGGACGTGTTGGAACATTTACATT  
ATAAATATATTTTCGTATACTCTCATGTACACATTATTGTAAAATTTAAAAATCTGTTTTGAAAAATCATTT  
TATTTGAAAAATAACAACATCAACTTTTTACAAAAATAAGGTTCTTCTGTCTAATACTCTTGAGAGCTAA  
AGTACGGTGTATAATTGTACTTTTTGTTTCATGGTGCATAATACCACGTGTACGATTTACAGTGACAAAA  
CAATTAGATATGGAATTATTTGTACACCAAGTTACTTAATTCGTATGCTGATAATTTGAGGGTACTTGCT  
TATATAAAAAATCGTGAAAAATATATTTTGTACAGATTGTTTACTGAGTAGAAAATAAAACCATGAGAGCT  
AACGTGACGTAACAGAGGATTTTATTTCAGAAATTATAGCTTTACCGAAGTGTGTATCAATTACTTTTAC  
GTGATAAAGTATTTTGTGTTACATTACAGCTAATAATTAAAGGAACCTTAGCTTGAAAAATATTTATTTT  
TACTTAACTATATCCTCTCTGTTTATTTAGTCGTGAGTTGGATTTGTTTTCTATTTAATGTATCTTTTT  
ATTTGTTTTCTTTAAGAAGTGTACTACATTATGGTTTTTGTGTTTTATTTGGCGTGTGACGGCCCGCTTG  
GTCAAGCGTGTAAAGCGTGCAGCTCGTAATCTGAGGGTTCGCGGTTTCGCATCCCTGTGCGCCAAACAT  
GCTCGCTCTTTAGCCGTGGAGGCATTATAATGTAACGGTCAATCCCACTATTCGTTGGTAAAAGAGTAG  
GTCAAGAGTTGGCGTTGGTGGTGATGACTAGCTGCCTTCCCTCTAGTCTTACGCTGCTAAATTAGAAAC  
GGCTAGCCCTCGAGTAGTTTGTACGAAATTCAAAAACAAACAAACAAATATTTGGCGTGGAATAATGTG  
TCGACCATTAAGTACTTTAGGGAGCCATCTAGCGGCGATTTCAACAGTAGCAACTCAAATATTTCTGTGC  
TTCTATTAAAGAAATAAAACTTTTTATCTGTGTTATCATCCGTTCTTTTTCAGAAATATTCCGAGTGGAACC  
AGTTTTTTGGCAGCGCCAAGACTGCTGGATAAAGCGTTTTAGACAAATTCAGTAAATAATTTTCATCTAAAT  
GTATAGAACGTAGTAAATGATCTAACCGTTTTACAGGTGGTTTTATTGATTATGTAAATCTGTTATATCA  
TTAAGTGCCAAATTTTATACTGTTGTACTGAAAACATCAACTTATACAGAGTAATCATTTTACATTTTATT  
TACCGGGAACTGACACAGCTGTAAATGGTTTATAACGTGAATTTATCTGCCATATACTTATATTTTATT  
TGTCAGGCTGTCTTTAGTTTCTACTTTATGTTGTAGAGATTATGGTTAAGTTTAAATTTCTGTTTGTATT  
ATATAACATAATATGTATACTATTGTAAATGATAGATATAACATGAAAATAATACAAAGTAGGATAAGTC  
TAACATGAAATGAACACAATGATGGATATGAGTAAGAAGACACAATACAGTTGAAGGTATATATACATAT  
AATGTGAAACTAATAACATGAAAGGTATGCCTAATACTTAAATAATACAAGAAAGAAATTTCTTTGGCACA  
GTACAATGAGACAGTACAATAAAGATATGTTTAAATGTAAATGAATATAGTCAAAAAATACATATTGTGTT  
AAAGGAATACATTTAAAAATATGTATATATGAGACAAATGAAGTGAGACACGTTTAAACATGAAATTAACA  
CAATGAATGATACATAAAACATAAAACTGTACGGTGAAAGATATATAATATCAAATATGGAAGCTAATCG  
TATGTATTATATATAAAAGAAAATGAAGCATAGTAAATATATGTATACTATAAACGCTATGACAAAGAA  
TATCACAGTGTGAAACTACTATGGTTAAGAATATGTTTAAATATTTAATATTTTTATCATAAAAGGTACGT  
TTATGTGTTTTGTTTCAGCATAAAGCTGTAGAATAGGCTACCTTTGCTCTGTCAACAAGAGAGCATCGAAC  
CACAGATTTTGTGTTGTAAGTTCTTACCTGAGAACTAAAAGATATATATAATGTTAGTACGACAAAAAT  
ACATGTAAAATATGATATTGTTGTTTATTATCTTATAAACGAACTAGTATAATCGTAACTGTGTTTAT  
TTTTAGTTTTGATATATGTAGGAAAATTACTTTGATCAGCATTTAATGTTAGTTAATTAAATAAAATAAGT  
TTTGAAATTTCTTCTTCTTCTACTACAGTTTTTCGTCAATTAATCGAGTTTTTACGAAATCTTGCCGCTAAAA  
AGGAACAACAAACACAAGATACTGTTTACGATAAATTGCGCCTACTTAATGGACAAGGTTGGCCTCGTCC

AAACCCATGGTACCCCTGGTAGTGCTACGTTTGGTGGGATAACACCCGCTTGTATTCCCTCCTCCAATCACA  
GTATCAGGACTCCCCAGTGACAGTGGCCAAGTCCAGAAAAAAGGTAAAAGTTTTATAATTTTTTATATAA  
TTATAATTATAATTTTTTTTATGTTTATCTGAATAAAAAACACAACAGTAACAAAAACTCTAATATATTAT  
CCACACACGAATAAGTTTGAAGCAAATTACATATCGGTGGCTTTGTTTCACATGTCATTCATGTTATTTG  
AAATACGATGAAAAGTACTGCAAAGCTAATATAATAAATGTTTAGCTCAACTTGGAAAACCACAGGCTCA  
ACTGTACGTGACGTATTTAGTAAGTTTCTTTATCTGCGTTCCTAAAGCTTCGTTTCATCTTTTTTTTTTACG  
AAGAAAGCATACGAAATATGTTTCGAGAAATCTAATGCTTGTCTTTTCAAATTTCAAAAATAACTTTGA  
AAAATCTAATGCCGTGATCAGGAGCAGTTATTTTAACTGTTTATTCTCGCTCATATTGTGACTTCTATTAA  
AAACCTTATCTTTACAGTATGTGTTAGACAGAATAACCGAGTAAGATACAGGAGACCTTGATTTACGAA  
TTACTAGTTGAATGTGTTTCTCAAAGCTAGTCTTATATCAGAGGTGTTGAAAATGAGGGTTTCTATGAAA  
AAAGGAACATGACTGAGCAATTTTCGGATGAGCTAACCTGCAATATTTATATATAGAATAATTAGTAGTTG  
TATCTCAAGAAATCTATGTATACTTTGTCTCTGCAACTGTACCTTTACCTCACTCAGTAACCTTACAAAAT  
CTACCAGTAGACAAAGCTGAGTTCCTTTGTGACGTTTGCTGTGTGTAGTATCTTGTACAGTGTCCGCTCT  
TGAAGTATAACGTGTCACCATTTAGAAAGGGTTACGTGTAATTTATCCTCTTTAGAAGTTCCTGCAGTC  
TACTGTGTTTCTCTGTGTTTCATGTGTCTTTCATCGTATTCATACGCAATTAATGTGTTGTCTAGGAATAC  
AATGAGCGTGCGTGTCTTGACTTAATACTATTGTTTACATAGTTTCAAATTAGATCATGTCTACTACTAG  
TTCATTGTTATTTTTTATTCCACTTGAAGAGATTTTGCTGATTATACACCACGATAACAAAAGCTTTGAA  
AAGTGCGCATGGATGTAAACAGTATCAGACGCTATGTAATAAAGCTTAAGGTAGCTGTACGGATAAAAATG  
AGGAATAAATTTGGAATACACTCACTGAATTTTACGTAATTATAAGGTGGTTTAAATTGGAATAATCCTAAT  
AAACAACTGATTTCTTAATCTCTTTTACATACTGAAAATACCTCTATGTTGCAGTCTGTATACGGGTGT  
CGATGGCTAAGATAATTTTGTTTGAAATTAAGCACAAAGCTACCTAATGGGCTATCTGTGCTCTGCCCAC  
TATGGGTATTGAAACCCGATTTTAGCTTTGTAAGTCCAATATACTGCTGTGTCACTGGTGGGCAGGCTA  
AGATAATACAGAAAAATTTGAGTACGGTTGTGATGGCTAAGATAATCTAGAAAATCATTAGCCAACGC  
AATTATGCTTAATCAAGAAAAGAAGACATTATATTAAGTTTATAAAGAAAGAAAAATGACAAAAATGTTT  
TAAAAAATATAAATATCAATGAGCTAAAAGTGACATCTTCAGAGAAACATCTTCTTCACAATTATACA  
AATCTACAATAAAAAATTTTAAAACTCCAACAATACGTGACTCAGACAAATGCGCAGTAATAGTTAAAAA  
CAAAAGACTAAAACTACTAGGAGACTAAAGTCGTTACAACCAGAAAAATATTCACTAACACCTTAAAACT  
TAAAAACATTTAAAGAACATTTTTTAAACTTGAAATACATTATTGGAAGATTAAGCTAAGCTATTGATAGA  
CAACAGTTGTAAGACCATTTCAAAAATATATGACACAAAACTAAAGTATTGATGAAGCTTGTCTCCAG  
TTTAGCGACGGTTTTTCTGGTAAATAAATGCTAGATGGGTCTGCTCTCGCTGGGACAGCGGAAAGTCTTC  
AGATTTACAATACTAAAAATAAGGACTTCGAATTCCTCACTCAACGCAGCAGATAGCAAGATGTAGCTTT  
GCTATAAGAAAAACACACTTTCTTTGACTAAGTCTTCTAGCTGGCACAGTTATTTTTTACACCACTTG  
AGGTTGCATGTCTTAAGTGTCTTTATTGCATTTTTTAGGCTCCTTCGGTTTTGTTTGCCCTTCTTCAACT  
GTCGTTGAAGATTTGCCTCGGGATTCTGGTCTTCTTCAACCGGATGGCATAACTAGTCCACTGTAAC TG  
GGCTTTTCAAGCAATGATTCAATACTAGTTGTATTGTACTTGACATATCAAGGACTTCTTGATTGGTGA  
TTCTATATTACCATTTGAATGTCCATGATCGAATGTAGCTTTTTTCATGTGCTTATCGTAAATAATTATGTT  
TCACAACCAACGAACAGTGAACGTGTGGACTACTGCTTTGTATACTTTTAGTTTCGTAGACAGTTGGGTGT  
TTTTTTTTTTTTCTCTAAGGCACCTGATACACAATCTTCTTAAGGCTTGGTTGGCTTTCTGAATTCTAGAC  
ACAATATATTTATCCAATGTTATATCTGCGAAAATAATATTCCTCAGGTGTAGGATGTTCTCCAGGTTTT  
TCAGTTGAGTTTCTTTAATTATGGTGGCAAATGTTGCGGAATCGCGTTTTGTGGCTGGTTGAGGAAGAGC  
TTCTGTTTTTTCCAGGCCAAATAACTTATAAACCATGAGAACTTGTTCATCCATGGTCTTCAGACGATTT  
TCCTTGTGTATCACAAGGGAACGATTTTTTTTTTGTGTTGTTTTGAATTAAGCACAAAGCTATACAATGG  
GCTATCTGTGCTCTGCCACCACGGGTATCGAAACCCGATTTTAGCGTGCAAGTCCGCAGACATACCGC  
TCAGCCACTGGGGGGCCACAAGGGAACGAACACCCACAAATAGTGTTTTAGGGATGAGTCTTCTAGAGT  
TTTAGTCCGTTTCAAGAAAGCGTCGAAGATAAAAAAGAAGACCCGTTAAAACAATAATTTATGTAGACATC  
AAGGTCCAAGTTCTTAACAGCATGAAGTAGAACTTAAGTGAAGAAGAGGTGAACAGAGTAGTTACAAGC  
ACACATCTCTTCTCACTTCAATTAGATGTTAAACACTTCTTAACATCTCCATAGAAAATTACTTCTC  
TATGGTAGTCGATTTTTTTCTGAGGCCACAGGATTTCTCTGTTGACTGTGTTAAAAGCCTTTTTAGGGTC  
GATAAAGACGGCGTAGAGATCCATATTCCTTTCTAACCCTTCTCTTGACCTGTCTTACTGTGAAGATC

ATATCTACAGTGCTACGACCTAAACGAAATCCACATTGAGCTTCAGGTAAATTTTCCTCTGAGATACTTG  
AGACTTGAAGCTGAGCCTGTTCAAGATGATGCAAGAGAATATTTTTCCTGTAATGGAGGGTGGCGAGATTT  
CTCTGCAAATGTTGCAGTTAACCTTTAAACCTTTATTTTTTAAACGGTGCAACAATGGTGGCTAGTTGTGA  
GTCAGTTAGCAATTTTTCTTTTTCCAGATACTAGTCAAAACATTGTGGACGATCTCAAATGACACTGTG  
TCAAGTGACCTCTACAACCTTGCAGAGATCCCATCTTTCAATGCACTCTACCATAGTTTGACTACTTAGC  
AACATTTCTAACTTCTCCTCACTTGGACCTAAGTCAAGATCTTTACAGACCTGTATCTGGGGTATATTA  
GGTTGTTTCAGAAATAAATGTTGTTTTTCAAATGCGAAGTTTGGACAAATATAAACAGTGTTGTAAAAACA  
TGGTTCAATACAATTAAGCACCATTGTGTTTCAATACACTTATGCCAATGTTTAAGAATATTGTTTTATGCC  
CCTGCTGTAGAAATCAGAGTTTCTATTGTCAATGAACTCCATAAAAGCTTCTTTTGTAGCTGCCTGGTTTT  
TGAAAATGTTTATTGTTCAAAAAGCTACCAAAGTGCTTGAAAAAATAAAAATCTATAGGGGGAAAGATAT  
GAGAAATAAGATGGATGAGACAGAACCTCGATTCCGAATTCGTTCAATTTTTTGGAGCGTCATCCTTGACA  
GGCCTCATAACGCTGGTCTTGTTGATCTTCAGTCAGTCCAGCGGAACCCACTTATCCAACTTTTTGTCTT  
TCCCATTACACTCAGGTTGTTGGCAATGCTTGATTTGCTTGTGCCTAGCTTTTTCTGCAAGCTCACGTA  
GTTGTGCGAAGGTCTGTCTCAACTGTTTCTTTAATGCATTTTCATCTAAGGATGGTTTCTATAACCTTC  
GTGGTCTTTAACACTTTAATCTTTATGTCAAAGCCTATGGAACCAACATTTAACTGCACGTTTCAGTAACA  
GATCCATGGCTGAATGTTTGGCTGATGTTCCGTGTAGTTTTGGTAGCTTTTTATCCAAGACTGAAGTCGT  
AAAGGAAAATCAGACGAAAAATCTTCTTCCATGCTGCCTTAGGGGTTGTGAACTTACTCCGAGTAGAA  
TTGAAAGAGCAGACAATTAAGACACCTTGGAAGTGACAAACGTTGGATTAAACCAACCAACGATAAGTTA  
CGCAATATTCTATTTTTAAATTTCTATAGTGATAATTGAGACACTTATCTATGAACAACCTATTATAATAC  
AGTGAAGTTTGATAAACAGTGAAACGGTCAGTTGAGGGGTTAGCTGGAGTGCTCTTCCATCTTGCAATTA  
TGCCATCTTTGTCTTGGTGATTTTGGTGTTGTCTAGAGCAGTTTCTAATTTTAGAGAACAATAAATGGT  
CTTTATAAGACAAACAAACGTATTAGAAATTGTTTGTATCTACATAAACTTAACTCCATCTGCTTTCTTC  
TTCCACTGCCAATTCTACATCATGCGAAGGTTTCGTATAGCTTTGGTAATAAGAAGCTCTCTAATGGCCT  
GTTGACGAGTAAATTACATAAATTTGTGAGGTTTCATTGTTTTGGCCTTGATGCATTCACCTTGTCTTAA  
ATTTATTAGGTTGTCTTAATATGGTGTTGGTTATAATAAACGGACAGTGCAAGACACATTTGCTCACGAA  
AATCAAGTCGTTGCTGTTCAATTTGCCACACTCGTGTTTCTCTATCACTCTTTTCCACTAGATAACAATCCT  
TGCCGACTCAAGCATTAAGTTATCCATCAAAATGAACTTATCGTTAACTGCAAGGGTTCTGATAACAGT  
GTGCAAGTTTGCTTAGACTTGTCTCTCGATCTTCTCTGTATTATTGGTAGCTAGATCATAAGTGCTGACA  
ATTGTTCTTTAGCGCTTATGGTTTAGGGTGAGGAGGAGCTTAATGAATTTTTTCAGTAGGTTTCACTTGAT  
GGCCAATCTCACTCTATAGACTCTATCCTCGTTCTCCACCTCCTCTCTCCAGAAGTAGGTATACGCCATC  
TTTAGTTCACTCAATGACCCGGCGAGCCTTATTTTACAAAGCGCTCCTAGGTCAACGTTGTAGTGTGCTA  
ACTCTCATCAAGTAAGGACTGTGGAGTCCCGTTACATTGTTTTTGTCCATGGAAGTGCGAGCGTTCAATG  
CTCCTAAAAAGATTTCTGTGTTTTTTTTTCCACTTTCACTGTTTTTCACTCGACTGCATAAGGATTAATTT  
CCAGCCACAGTGAAGTGGGCAACAATGTTTGGTGCACTTTTTTCCAACATCTTCCTTACAACAGTAAGTA  
GTGCTGTTCTGAATAAGGCTGATCCAGTTACCACGAAAGATACTGAACTCTTCTACTGCCCTTGGGTACGG  
AGAAGAATGAGCATTTGTGCCAGGATTGTCTACGTGTAGATTCTTGCTATAACTGTCAGTGGTTAACAC  
CACCTGTCGCCCTTGCTCACTCACCCAATACCGCAAAGCCTTATAAAGAACTAAGAAATGCAGATGGATTG  
AACAAATTAACATGTGCCTGGGAGATTTTACAATGAGAAAATCGTTGCGTTGGGACAGTCTCACTCTTTTCG  
GCCAAGGAGTCAAATTCAGTAACACAGAGAATCGTTACAACCTGGGGGCTTTGTTGGTTGTAGTAAATGG  
CCATGACTTGTATCGTGCTTTGTAAAAACTCTAGGCACTCGACAACGCCTTGCTGGTACACCTTCATGAT  
TGTTAAATCCACTGTTGATCTCATCAGTCCAATCATTTAAATCAGTCTTCACAAGCCATGGGTATACATA  
TCCATATCTCACGGAGAGTTTGAGCCCCGACGGTGAATAAATGTTTCACGGCTTAATAGATTATTTTACA  
ATTTTAGAGATTAAATAAAATAGGATACTTAGTCACAAAAGATGTAACCTATTTGAAAAAATAATTTAA  
TTTCGGGTATCACTTCTATCTAGGAATATTTTAATTTATTATACATATGATGTTTTCATGAAATTGTGTTG  
ACGGACGTATTAATTCAAAAAAATACTTAATGATCAGCATCGTGTTGAAGAAACAACAACGTACTTTAAT  
AATATATTTTATCTCCACAACATAAACTAATCCTTATTTTCTCAACTTCTAAGATCAACTTCAAGTCGCT  
GAAAAATTTTCACATTAATTATTAATAACATTTTTTTTTTTTAAAGATGGGACGCTTTATTATATATATGTA  
TAAATTTAGCTTGGTATGTAATTATTCAGCCAGTAATGCACGAACGTCTAACTAGAAAAGTATACAAGCAA  
CATCTTATGAAATAATGTCATTACTTAAGTTGGGTTGACCGAACAAAGAAAAGATGGGATCTCCAGTAA

ATTTTCTTAGTGGAAGCATAGGATAATACAGGAAACGGAGCTGAAACAGTGATAAGAAATGATTATGGTT  
CAGGTAGCAGCTGAAACGCTATTTCGTTGTCTTTGGATTGATTCAAGTGAAAAGCAGATAACTTGGAGACC  
GATTGTCATTAATAGAAATGTTGAATTGTATGGTGTGTTATATTGTTAAAGTACTATTTTTGGTGAAGTTC  
CCACCAGTATCTTTGTATATTGTACGATAGCGTAACCTTTGTGTGCAATGATCACGTGATTTTTAGAAAT  
AAATGTTCCCTTATCATTTGTTATTTCTCTTGGGAAGACGTGTGTCAGCTACCTGATTTTTATTGTGAAG  
TTTTCCGTAATGTTTTCATTTGATCATATTATTTATAAAATTTCTATTGATTTAACAATAACAACATTGTA  
TTGAAAAGGAAGTTTTGTAATTTGACTTTCTAATGCAATTTAGCTATTCAATTCCACAAATGTATTTAA  
AAAGAAAAATAATTTCTATTATAATTTCACTTATCCTTTCTTTTCGTGATAAGTGTAGGCCACACATT  
TTATAGAAAAGCTAGAACTTACAAAAAAATCAATGTTTCAGTAAAACCAACAAAACCTACAACAAGCTTTCA  
TGTTCTAAACTTTAACACCCGAATTGCTTAATCTGTTTAAAGATATAGTAAAGAGCAGATATTTATATAGT  
TTTTGTTGACAGATCCTATGTGGGGAATTCGACAAAGTTTCGGACGTATTGAATAAAATAAATAACAATAA  
TGCTATATGTTAGGTTTTGTAATTTAAAATAACCTGAAATCGAAATTTGAATTTAGAAGTAAATGGAATG  
TCAATATGTATTAAATTTACGATATTTTTCAACCAGATTGATACACAAAATTGTCCTTTCTTGACGTAAAT  
ATATTTTAATATACAGAGAACCATACAATTTATAATAACTGTTAATATAAAATAAATAACTTATATACAAAT  
ATTTTACGAACTCACAGACAATACTCAGTTTTCTGTCTGGTCTGAAAATAAATATCTTACTGATGGTCCA  
GGTCAACGATGAGCGAATTAATTGTGAATTGATATTGTTACACTTTTCTTGACGGGAAAGCTAGCTAACT  
AAACTCTTGGCTGGTCTCACGCAGTTTATAAGTTCACTTTTACCGAGAAAGATGTGTAATGTCTCGTAG  
GAGCAGCATTAAGTCTGAAGTTAAATGGTTTGTGAATGTTTCGAAATCTATAAAGTGCCTGGTCGAATATC  
TGTAATTTTTTTATTAATAAGCGTTTGTACAAATTAAGCTTTTCGAGGCTTATAATATACTGAATATGGT  
TGACCAACAATATTCTAAAAACGGTCTCTTAGTGCTTTGCTTTATAAACTTTATGGCGAGGTTCTTGAAAA  
TTGGCAGCAATACTGGCACCCACTATTATTTTATATACACACATTGTACATAGTTGATTCTTACACTCGA  
GAATCTTCTACAAATGTAGAAAACAGGTGGGACTCGCGAAATACATTTTTTAACAACATAAGTTACATATA  
TTTCTAAATATGCATTAAAGTGAAACAACACAGATATTAAAATAATATTAAATCTGTTACATATACCATT  
TTAATTTGTGATTTTAATAGTAATAAAATGTTGACCCTTAATTAATAAACTGAACTCTTAAAGTTTTTG  
TTTCAACAATATTATTTGCCCGTGTACTTATGCTACAGTGTGGTTTACGCGTGTGCTGAGGCCACAGTTT  
TGTTTAAATGTGTACTCATGTTACAGTGTGATTTGCATGCAATGATGGTTCAAGGTGGTTTACACGTGCA  
CACCTCGTGATGCTACATTGTTGTCAACAAGTGTATGCGTCTTAAATGTGTTTTACTCATGCAGTAAAT  
GTACAATGTATTTTACACGTGGACTGCTGTTACACTATAAAATTTGGTTGAAATAATAAATGTTATGTTAA  
AACATGCAAATACCAATTTTAAACAGAAAAGGCGAGTGTTTGTGAAAAAACTAACATAAGAAACCGAAA  
TCAGTTCAAATTATTTAAATGAATAAACTTAAACGTCAGTATCTTCGGAACCTTATGCAGACTCAACGACA  
AATCTGATATGTATTGCGAACCGTAATTCAAAGAACAAAAATATAAATTTTCCGTATGTTACTGTTTCAGC  
AATTCCTTAGCATGACTGAAATGACCAACAAATACTTTTACGATGGGTGATACAAGTTGCTCAGAGCTTT  
GGCTCTGAATGAATCCAAAGGTGTAAACAGAATCAACCTTTTAAAGTCCATGAAATAATTAACCTAACTT  
TTCCAGTCACTGGGAACGGGTACTTTTTCTTGCTGCAAATAAAATAGTAAAAGAAAGACACATAGAGAAC  
GTATTACTATTTTTCCGAAGTCTTGAAATGAGGATGATTTGATACGAAAAACAAAACCTGAAAATAAAAA  
GAACCTCGAAGTGATATCAGAGATATTGAACTTATATTGGAGATGGACTGAAATAAATCATCACTAGAGT  
ATATCCACTTCAAATATTTTGTAGTTCGTAATCCCAATGACATATAAAATTAGAATAGAAGATTTATGC  
TAGTCTTAACTCTTTGTACTGCCCCACCCATGCAAATACGTAGTCTGTAATGCTATATAAGTATCAGGTG  
AAGAGACACTTAGAAGTCTTATAAATCAGTATTATTTATTTTATTATATATCCTATTTTTATTATATGTTA  
AAACCATTCAAATAATCAAATTTCTCTTCTCGCACCAACAGGCCCCCAGTGGCTCAGCGATATGTCCTG  
CGGACTTACACGCTAAAATCCGGGTTTCAATACCCGTGGTGGGCAGAGCACAGATAGCCCATTTGTGTAGC  
TTTGTGCTTAATTCAAAACAACAACATCACCAACAGAATATAAAAAATCTGATTCTGGTTATTCTACATA  
TTTCTGTTTTTAAACATTTTTTTAGTTTTCGATTCAAATCATCATATTTTAATTTAATCACTCGTGGTGACA  
TCAAAGAAAATACTAAACAGAAAATCAAAGTGTTTTAAAGTAATATTGCGATAAACTTATTGTAAAAACAAA  
ATTCAGTCGTTTTCTCAGAATATCGATAATTTCCATAAGGGAACATCTACTAATATCTCAGGCTCTGTTC  
AACTACTACTACTATTTCTATTGAGATTTTGTAAAACTTACCAAACCTTTTCATTTTTTACGTAGTTTTCT  
TAATACAGCTGGCTTTTATGAGTGGTTCTAAATGGCATTTGGACAAGGCTGAAGTTTTATAGAATATTTTT  
ATTAATAACGACAAGCACGCTCATATATAACAATAAGGTTTAATTTAAGTCGCTATGGATGTTGTAATAC  
TTGTGTTAAGTTTGTGTGACTGCTAAAGTACTTAATTTGAAACCTGTATGGCTGCTGAAACACTTAACTT

GAAATCTGCGTGGCTTCTGTACTGCTTATCTAAAAGTCAGATGGTGACTAAAAAGCATAAATTAAGGTTT  
GTTTATGTGTGTGAGCACTGTAAGGTGATGATAGGTCTACTTAATATTTCTCACAATGTTCTATAAGTGC  
ATGTTTTCCAACTGTCACTGAGTTGTTGGTAATTCACTTTTAATTTGTTCTTGCCCTTAGCTAATTTAA  
TTGCATTTAATCTGATTTCCGTAATCGATATATAATTGACAAAGCGTAACGTAGGATTTCCCTTAGGCCTA  
GCTTCTTTCCCTTGCTTTAATGATGGTGCTTGCTAGCTCTATCCTACTCCTTAGTTATTTTTGTCAAATC  
ACCACATCCTTTAAAGAATGTATTCCGATCCATACCACTTTACAACCTTTGTTATTTTTGTGTGTGGTAACT  
AGAATCAGTTAAAAACCATTTCAAAAGTGTTCAGACAACCCAGCAGTTAGAAGCTTTGAAAAGTACAAAG  
AATCAGTTTTTTGAATATATATGTGTATTTAATCTATCAAAAAATAATCAACAAAGCAAAGTCGATCTTAA  
TATGATTATTTACTTTATACAGTGTTCAAGTGTAATAAGCCCACTCACTACCCTATCCCATGTGTAAGTT  
GATTTTTCTCCACCAACAGAATGTAAGAGGCGGAGCACAAGATGACGTAATAGCCACTCCCTCTACTGTG  
AAAAATAACAGCAAACCTTGCGAAAATGCATGAAAATATGTTAGATGTTCTCACGCACCTGATAAAAAAAT  
CACGAATTATGAGCCATTCATATATTCACATACTCAAAGCATACTAACTGATCAATTTTTATTAGTAATGA  
TTTGGCTTATCTGTAACAACTGGCTTGAGTTAAGATCTTATGGTAGCAGTTATGGTAAGGTTGGTTGTG  
AAGATTGGTTATCCATTGTTGT CATAGTTAATACTCTATACAATATCTTCAATCTAATTACCAACTACTC  
ACTTTTTTTAGTACTGCTATTATTATATACTAACTACCAGTTTTCAAATATCCTGAATTTTCGGCTACTAA  
TCTGATGTGCTTTAAGGAAGTCACGGGAAGAACCGTCTTTGTTAGGACTTCCTAGAATACAGCAGTGGA  
TTATCAACCAAAACGTTAGTTGTAAGCTAACTGGTACTTGACATTTGTTAAGAGTCAAGATAAGCTATAA  
AGATAACATAAAATGTAAATAAGTGATTAGGCGTACGCGGT CATATAGGCAAAGACAATGACTCTTTAAT  
AGTGCCATCTAGTAGTTGCGTTTTAAATTTCTTAAATTAATATAATTTTTTAGGCTTTTTATAACTTTC  
TCCAAGATGTAAATATAGAATATTAGGTCTAAATGCATATTATAATTTAATATACTCTATCAATATTT  
TGTTTTGATACATTTTTTAAATATATAAAATATTTCAGTCTTATTTGATTTGAAACATGGATTCAAATTAG  
GACCTGGATAAACTTATTCTGACAAAGTTTTTCATTAGCGCATTACTATTTAATACTTATTACCTAAAG  
GTGTTTGTATATTTTTGTTATAGAATACTTTGATACACATTGGACTGATATATCTGATAATATTGTGTT  
GTTTTGAATTAAGAACAAAGCTACACAATGGGCTATCTGTGCTCTGCCCCCACGGATATCGAAACCCGG  
TTTTGATCATTGTAAGTCCGCAGACATAACGCTGAGCCGCTGGAGGGTCTCTGATAATGAAAAACCGTT  
ATGATGAAACACGTGTTAATAAGTTTAAATGATTCAAGCAGTATAGCACCAGTTTCCTTTTTTATGTTTTT  
TTTTTACTAGCTGTGCTTAACTACTTTTTGTTTAGAACACTTTGTTTTTACAAACGGATCGTGTAAGTGA  
TCTAATACAAATAAGAATCATTAATAGTGGCGCTGAAGACTTCTGTTATTCTAACACCATGCTAGAATGT  
GTTGGTCATTTCTCAGTCATTTCAAGAAGTTTAAAGATTTGAAGATATGATGCGTTAACATTTGAGATCAA  
ATTCACGTATGTGTGACTACTGCATGTGAAAGCGTAAGTTTTCCCTTAGTAACGTGTTGTTGGTTGTGGAAT  
TTCGCTTCAAGTTATATGCGTTAGCCGTTTCTAATAAGTAATTTTGAAATGATAAACTAGAGAGAAAGCA  
GTAATCAACATCACCTGCCACCTAATTATAGGCTATTCAAAGAGTCTTTAAACAGCTAAAAAGGTATAA  
ACACTATTTTGGTGTATACATCTACGTAAAGGTGTAAAAGCGACGAAATATTAAATAGTTTTGATGTAT  
AGAAGTTTGAATTATGACACAAAATTGTAAAACAAATGTGAGTTTGGTGTACCTGGAAAGTTTCGTATCTA  
AGGGGCCCATCATGGCCAGGTGGTTAAAGCGCTCCACTCGTAGGTTGAAGGTCGCAGGTTTCAATCCCCG  
TCGCATCATACATGCTATCTCTTTCAGCTGTGGGGGTGTTATAAAGTTACGGTCAATTCCTACTATTCGCA  
GGTAGAAGAGTAGCCCAAGAACTGGTGGTGGTGGTGGTGTGACTAGCTGCCTTTCCACTAGTTTTACA  
CTGCTAAGTTAGGGAAGGCTAGCGTAGATAGCTCTCGTGTAGCTTTGTCCGAAATTCAAAAAATAACAAA  
CAAACAGTATCTAAGACAACGTAAGTAATAATACAAACTCATGTGTTTATATGACAGTTTACAAACGAGT  
CTTTTCTAAAAATATGCATGTGTGTGTTTTTATATTTCTGTTTATAAATGTGTTTATGCTAATCTATTAAT  
TTGTATTTATATTACGTTCTTTTCCAGCATTGTATTGAAAATGTTTTAAATTTAGTTATGGGAAACGCTT  
TTATAAGAATAATATTATTTCTCTCTAAAAGATAAAACAAACATGATTTGTAGCATTTTTTATGACAAATTA  
TTTCTTCTTCTTTTCATACTGGACAACTTAAAATAAAAAAGCTAGAATTTATCCGAATCGAGTGTCTAT  
ATGATCTCAGGCACTAAATCTGGGGAAACCAGTAAAAGCATCAGATACAAATCGTTAGGGTTAATACACT  
ACTTCTTGACCTTTATAGTCAGTGGCTCTTTTTTCAACGTCGTTAGTCTAAAGAGAAAACAGACTTTGAGT  
GGAAGATAGTGACACTGATCCTAAAGAAGCTGTTTGTGTCACCTTGCCCTCGCCTTTGTTTCGATTCTTCA  
TCTTACAAGAGAGACAACAGGGGAGAAAAATCTATAGATAAAAGCTTTTTCCGTGAAAATCACTGGAACAA  
AGTGTTTCCCATGTTTTTCTCAGCTTTCTTTGATTGTTATAAAGACATGAAGTAGAAAACAAGAGAATGCG  
AGTGAAAAAGACGCATGAGATACAAACACCAAAAGTTATACTGACTTTAAGATCCCTGAACATAATGAA

AAATAGGTTACAGATTTTATTGGAAAATTTTCTGTTAGTACATACAATAAGCGAACCACAGAGTGAAAAAGT  
TAAAGTGGACATTATGAAATTTGTAGCTGAAGTTACACCAACTTAATCGGATTCATATTTTGAAGTGTGTGA  
GTCATGCACAAAATTTTAGCTTTTGGAAAAATGTCAAATCATAGCGATTTCTTTACAGCCAATCTCATAAAC  
AAAGAAATATTACGTACTTTAGAAATCAAGAATGCATTAATCATAAACCAAGTTGTACTGCATAGTTTGA  
GCTACCCCTGTCAACTTTTGCAGTTTTTGTAAATTTACATGGTTACGTTATATACTTTTGGTTGGTGT  
CCTTTTTTTTATTTTGCACAAAGCTAATCAAAGGCTATCTCCAATAGCCATCCTAAATTTAGTAGTGAAGG  
ACTATAGGGGAAGGTAGCTAGTCATCACAGCCACAACCAACTCATTGTCTACTGACAAATTTGTGGGATTGA  
TCATCAGGTGAGAACGTAACCACGGCTAAAAGGACAAGCATGTTTGGTGAGACAGGGATTGGAACCCAAG  
ATCTGCAAGTTGCGAGTCGAGCGCCTTAACCACCTAGCTATGTTTATTGTATTAGATAATACTGATTTAT  
TTGTTATCTTTAAATGATCAAGCCTTAGGAACAAATGTTTGAAGGCGTTATTCTTTTGTGTCCTTTTCTG  
TATTGTATAAATGCGTTATTTGATTACACAGTATCCTTCTAAAAATGTTTATTTATTGAACCTATTGAC  
AAATTTTTTGAAGCAGAAACGTAATTTCTATATATTCTTAATATTTACATCCACGCACCCACGCGAGCAG  
CAGTAAGTCTAAAAGCTTATAATTCTAAAAATTTGGTAGCGATAACTGTGATAAGAAAATCACAGATAGC  
ACAATGTTTCAGTTTTGTGCTTAACTGCAAAACAAATGAAACTCCTTTCATAGTAACGTAATACAGAGTAAT  
ATTTATCTAAATGTGTTTTTTTTTATAGCAAAGCCATATCGGGCTATCTGCTGTGTCTACAGAGAGGAAT  
CGAACTCATGATCTTAGCGTTATATATCCATAGAATTGCCGCTGTTCCAACCTGGGGAGATTTATCTAAAG  
TTGGTCGTGTTATTTCAATTAAGATGGGGTGTAAGTTTTTGGTAGATGGCTGAACTTTGTCTTGACTTA  
GGTACATAGAACGGTTGATTTTCAGAATTATAATAAAATTATTAATTTAATAAGGAAGAATAGAGACCATC  
AAAACCATGTAGGGGCAAGTACAACAATGAACTTGGGAAATGATGAGTTTTCAACGTGGCAGTTTGTCAA  
TTAAGGCGCTATAAGTTGCACAAATATTTTTCCAATTAATATTCATTAGTAAAACCTCCGTACTTTTTTCTAG  
TGATGGATAGTGAAGAACTTAGAGAAATTTTTCAATTCGAAAAACGAAGGTGTTTGAATTAATTTTCAA  
ACTACTCTTTGACATACTCAATACAACATTCCTGCTATTGTTCTGGTTTTCAGTAAAATATTTGTCAGTCG  
TTTTTTTTCTGTAGCGCTTATAAACTATGATCAACAACAATAATGTTGGAGACATTACTATAAAAAATAC  
ACATTTACTCTGATAAACTAAACATTTAAAACTAGTATAAGGAGACTTAAATGATTTTGAAGAGCTTAT  
ATTAGTAGAGAACAAGAACTTAGAAAATTTTAATAGGTGGAATCTCGACTTTCGCAGGTGTTTGTTTAG  
TAGCTGTGCATAGATTTTGGTGCAGTATATCTAGCCGTTTCTGCAGTAGAATTCATGCTTTAAACACTT  
TGGAAAATAAATTTGGCCGACAGTGATGAAAAACACTAATAAAATCTCTCTTTCTCCTTCAAGAACCAACA  
TAAGAGTAGTTCTACGACCTACACAGACTTTTTTTTTTATAGTAGCTTTGTGAGATTTGGGATAAACATT  
CATAGCAGTTTTTTTTCTGGTAGCCTTGTGAAACAATAATAAAATTAATAATAATGATAATAATATTTAAAT  
CGAACGAATAAAATTTTGTCTAAAAATCGAAAAACTGACTTTCTTTTTTACAATTATCAATATTTTGTAG  
CCTTAGCTATTTGAGATAGAAAATTTTGAAGTGTGTTTAAAGAAGAAGCCTATTTTGAAAAATATTTTGT  
TTTTATGTTATATTAGAATTTTGTGAAATCCATTTTAATGGTTAATAACTAATATATCATAATTAACGT  
TTCACCTTACGCCTTCATCAGGTCTTATAGATTATATTAAATACACAATTCGAATGCCACTGAAAACACC  
AGTTTTAATATGTTACGATATTGTATATATAATTAATTTTGGAGTAATTTCTTTATTGTCAAAAGTAA  
TGTGCAATTTAGTAATAAAGAATGCACTAAATACAATTTCTAGTAAAGGCGACAGTGTACATGATAGTTCTA  
GTCGGAGTGATCCTGGCGGAAGTGGTGACGAAGAAAACGAGGCGAGACTGCGGTTAAAAAGAAAGTTACA  
GAGAAATCGAACTTCATTCACTCCAGAGCAGATCGAAGCTTTAGAAAAAGGTAAACAATTAAAAACGAATG  
GATTTTCATCAATTCAGATATTTCTGCTTAGGTTATTAGATGTTAGACCTATTACAGATGTTTGAAGCATC  
TCTCCCAAGAGTCTTAGGCCTATGTAAGTTATAAATAACGATGAACACATTTACTTGGGATACCTGATAC  
TTCAATATTTAAGACATTCTGTTTTGCCAATGTACATGAATATAAGGTAGAATATTTACAATAATTTAT  
AACTTTTATTAGTTAAATATGAAGTAAACAGCTTGAAATCAGTAAATTAATTTTATTTAAAACTACATCG  
TTTCAACCACACATGTAATTATCCTTAGGTTGGACTGGTTCTTTTCATTATTTCGGTAAAAATAATAGCAT  
AAAGTCCAATACACTGAATGGTAGCAAATAGTTTAATTATTTTTTACCACAGTGTTCGATTAACTTAAC  
TAACCTCTTATTGATAGGTTTAGATTCACTGTAGATGCTTACACAACAATATCACTTACTAATTTTTCTTG  
TATCTCTAACACTTCGTAAGAGCAAACTCAATTTTCATGAAACAGACCTAACAGAAATACCTGTCAAAGA  
TTATTCAGAATAGTGATTGTACTAGAGGCTAGGACACAGGTAATAAATTAATTTAATATTTATAAAATCAG  
AGATGGCATAAGATTTTTTCTTCAAGAGTAATTATGTATAGTTATATGTGATATAAAGTATTTTTAACTA  
CATTTCTTACTCGGAATGTTTGTATTGTAAAGGTGACTTATAACTGGTATCCAGTTGTACGTTAAAAA  
TTACATTTCAAAACACAATAATTGGTTATATGGTAGTCACAAATATATTTATGAATATTTTGCCACAGA

GTTTGAAAGAACTCATTATCCAGACGTATTTGCCCCGGAACGGTTGGCAGCAAAAAATAGACTTACCAGAG  
GCTAGAATACAGGTAATAAATTATTAAATATTTATATAATTAGAGAGATATTAGATGTTTTCTTTTCAA  
AAAGAGCTATAAGTAATTAAATACTATATAAGGTGACTCTCTAAAAATAAATATTGTTACATAATCCGTA  
ATTTTCTCAAACGATTATATGCAAACACAACAAACAAGAATAAATAATAGAAGAGTTTACTATAAGAACT  
CCTAGAAGTTTCTCTGAGGAAAAGTTTAAAAAGTTTGAACTTAAAAGCCTCTGAGGTTTACACAATACC  
TTAAGAGAGTTCTCTGCTAATACACTTACTTTTTATCATTCAATATGAATATTGTGTCATTAAAGTTCAAT  
TTAACTAAGCTGTTAAACATTGAATAACAACATTTAATAATGCAAAGATAAGATTTACCGTATAAATCC  
ATGTATTAAATAGAGGCACAGAATTTATTAAATTTAAATCTTTAGTCGTTATTTGTATTTTTGGATTATG  
GTAATGCTAGTAAAACTATTTGCTGCCATCCTTAATTCGATACTGGAGAGAGGGATTGTTAGCAGTTAGT  
ATCAATCATCGTCCATGCTAAGTGATTGACTGTGAGTCCTATAACGCATCGTCAGCTGAAAAATGCGAAGA  
TATTTTGTGATATCACAAGGATTTGAAACCTTTAGGCCAGCTTCGAAATCCAGAGCTCTACCACAAGGCC  
AACTCGTGCCATTTGTAATCACAGACACTATTACATGATAGTTATTACCTAACAATTGGAAAAATAAAT  
ACACATCCGCTAGCTATTACTGCAGAATCACCATTAAATAGTAGGATATTTAAAAATAATAAGTGTTAGG  
TAATGTAATATTGAGGAGATTTCCGACATTTTATCTTTGAATGGGACTATAATATTCTCCTATTGACC  
ACGTGCTCACCAGTAACCATGACATTGTAACCTAACGAACTTTGCGATTATTAATGAGCGGAAGTGCTAC  
ATCTGTGAGTGCCCTAGAATTATTTAGTAACTACTAAGTGATTATAAAATTGCTCAGTTAAGTATTAA  
ATAAATGTAAGTGAGAAAAAGTTAAAGTAACCTATTTAGAAAATGGGTAAATTAGGCCAATTTGTAGAC  
ATAAATTCTCTTTGAACAACAATGAACGTGTTAAGAATAAAAAAGAAGTTACTGAGTTTTTAGATTATTT  
AAAAATTCATAATGTGAACCTGTGAACATCCTAAGGACAAGATGGACTCCTCATCTCTATAGAGCACTTG  
AAGTTTTGCTGAACAAAAAATTCAAATCCATATATATGCATTTAGACCATACAGTTGAGTCAAAAGATGA  
TAGTGCTATAGGGGTTGGGAGAGCTAGAAAAAACCAACAGAACATGAAAAATACAAGACTTTGTTGTAT  
ATGCATTTCTACTTGTATCTTGTATGAATCGTCACTATTGAGCTTAAGCTTCCAACACGATCTGGCTG  
CTCTAACTAGCTCACTTGATGCACTAAATACCTTTGTGCTTGCTATAGAGGGCTTCAAGCATATGAATGG  
AGAAAATATAAGACACTTTATCCAAGATGTTGGTGAAGGCAATCAGTGACAAAGAGATTGAGCTCACTAA  
GCATGAGTAGGATCTTCTGTAGCAGCTCATTCTGAACAACCTTCTCGGGTTGTAGACTATGATAATGCTA  
CAGCATTACGTGAGTGGCTTAACCTAAAGACGTTCTCTCAGAGGCGAAACAATGTTGAGGCATAGACCT  
TTACCACCTTCTGGAATTGAGTTTTTCTTCATTTTTCCGACAGGTTCCCAAATTTGTGCCTTTTGGCACA  
ATCATTCTCACACTGCTAATGGACATAGCATGTTGTAAAGAAGATTTTACATTGTGAAGAAAAATCAG  
TCATGACTGGAGAGCCAGTCTAGATCCATTACGCTATTCATGCTAATGAGGATAGCAGTGGATGGTCCA  
ACATTAACCTGAGTTTGACTCCAGGAGAGTAGTGAGTACTGGTGACTCAATCTCGTCTACCAAGAGGC  
CTGAATACCTTGATGACTAAGTCTAGTCTACCTACTACTTACCAGATTAACGTGTTTACAGGTGTTACTCA  
GTACTAGTCCACTTTTATACTACTTCTAGTCTATCTAGTCTTGTCTACCAGGATAATTAACATGCTTAAG  
TGACACTTACCTGATGATAAAGATGCTTATAATCATTGTATGTAGAGTAACACAACTGAAAGTTT  
CAGTGTTTTTATTGAGTATTGTTATATTCTGAAGTGCTTAGTTTTACAGATATTAAAATGCTTATTATGT  
TATACTTGTGTTTTATTATTGAAGTCAGTTAATGAAATGGTATCTCTGTTTGTGTCAGTCTATTGCAGT  
TTTTATTGGAAGTGACTTCTAAGTGCGGGCAAGCAAATGTTTTACAAAGGTTACTCTCAGACCAAGT  
GGTCAAAATGTTAGTGTCAAGCCTTGAAGGATAGATTGTAAATTGTAACCAAATATTATAGAGTTACCTT  
AGAATTACAAAACGCAAAACAAAACCAAATCAGTGATAACCTAAAAATTATAATACAAAGATAACCTAAG  
GTTAAACAGTTCCCCAGAGAAAACCTTTGCCATGTAAAAATTTCAAGTATTGAGGTTGAATAGACTGAAAA  
ATTACATAAACATAAATTTTCTATAAATTCAGTTAGAGAGAGATAGTAAAGATTATTACACCATCAGGAA  
ATATTAGACTAAGATCTTGACTGTTTTTATTATTAGGACATTTTCATGAGTTATTAAAACATCAATGATT  
CCTTTGGAAGTGGTTTATTATAAATTTGTAAACCTTCATATTTACCACGTGTGAAAAGTTGAAGGAAAT  
AAGCTTATAAGACATTGAGATGATATCATTGGATGTTTACAAATATTCGTGATAATGAGAACTGGTGAGA  
GATGCAGCATGGATTATTCAACGTTTGAATTTAACGTTAGTTTAAACAGTTAAAATGTTCTACCCGGTTC  
TAGCAGTGAGATGCTAACTAACATCCACAGGCTCTTTCTGTTTCAGGTCTGGTTTTTCCAACCGCAGAGCCA  
AGTGGCGACGCGAAGAAAAAATTACGAAACAGCGGAGGGTTGCTGAGCAAGCTGCTGTGGCGGCAGCAGC  
TGCCAACTCAGCTCCTACTCGACTCTCTCTGAATTCAGGTTTTCCAAATCTCTCTATCCGGGTATAGGA  
CAACCAATGGCTAGTATGACCGATTCTTACAAATAAGGGAAAAAATATATTATTTTCATGAAATTACAG  
TACTTAATAGCACCTGAGAGAAATATAAAGGTCAATTATTTCAATTTAGTTATATGAAGCAAACCACTAA

[illegible]
