# Supplementary material for: Evolutionary Conservation and Diversification of Five Pax6 Homologs in the Horseshoe Crab Species Cluster
Source: MDPI journal article supplement (doi:10.3390/arthropoda2010007), 2024-03-04
Supplement: s1 [file s1]

>CM022401.1:58251910-58309519 Carinoscorpius rotundicauda isolate  
IMCB\_SINMHF\_001 chromosome 11, whole genome shotgun sequence  
CACGTGGGGACTAGTTAGGCCTAATTTTCGGTCGCTGTGGCTTTTTTCGAGTTTAGAATTTTGAAGAG  
**ATGCCACACAAAG**GTAAAAAACAACAGTTGCATAGATTTGTTTTCTTTATAGAGTTAAGCTTAATGTGA  
ATTGAATTTTCGTAGACCATGTTCAAAATGACAATCGTTTAATGGAAGACAGAATTTATCGATATTGACTG  
GAACGTCCTTTTACCTATAACCTAAAAAATCACTTGTTTGAAAAATTATTTTTGTGCTTACAGAGATTT  
GTTTCCTAAATTTTGATAAAAACAAACGTAACGTAATTTTCGTCCTTAAACACGAAATAAGGTATTTGT  
ATCATTCAGAATAATTTACATCTCAACATGCTTAACAGAAAAAATTAAAAGAAATAAGCAGATACACA  
GAAAAGAAGATATATTTGTTTGTGTTTAAAGTTTCGCGCAGAGCCACACGAGAGCTATCTGTGTTAGCTGTC  
CCTAATTTTGCAGTGTAAGACTAGAGGGAAGGCAGCTAGTCATCACCACCCACTGCAAATTCCTGGGCTA  
CTCTTTTACCAACGAATAGTGAATTGACAGTCACATTATAATGACCTCACGACTGAAAGAGTTAACATA  
TTTGTGTCGGGGAGTATTCGAACCCCCGACTCTCAAATTAAGAGTCGAGTGCCTTAACCACCCGGCCATG  
CCGGGCCAAAAGGAGATTTACGCTAAAGATGACAATGCAAGAATTTCCATTAAATTTCTGAATTTATCTAA  
TTAATTATGTGAATCTGGAAACCCACTGCTTTGGTCTGTTCAACATGATTTTCCCGAAAAGCTTGTTTAA  
AGTTTGTGTTTTTGTGTTGTTGCTGCTCTTCATCTATATTGGTCATAAAAAAACCACGAAAAAA  
CGTAATCTTTCTTTCGCGAACTTTAATTACATCGGTTTTGTAACCAATAAGGAAAACAATTATTTGTCCT  
TTACCGAAAATGTTTTACAAAAGTGAGAAATGCAAAACCACATAGTTCCTCCTGCTTTATAAACTTCTCC  
GAAAATAAGACAGGGGCTTATATTAATTTTCACTCCAAAATATAACACTAGGGCTTATTTTCGGGGGATG  
TCTTATTTTGTATATTGAAAAAATGAAGTTACAAAGTAAAAATTATAAAAACTATTAACTAACCAT  
TAAGATAAACTATTATTAATACTATTAACTAACTGATTAATACTTAAACAACTAATTAGCTAACTATTA  
AAGTAATTAATAAATTAATTTTTTTTATTTCTTTCTTCTTCTGCCACTCTTAAC TAGGGCTTATTTTAAAG  
GATAGGGCTGATATTAATACTATCCCCAAAATCTTATTTTATGGGTAGGTTTCATTATCGGAGAAACAC  
GGTATGAAGCAGGTACATGACGAAAGGAAATTCCTGCAACCTTACATGGTCATAATACTAAATTTAAGA  
CCATCAGTTTAACTTTAACTTTGTTTAAAGTTTGCTTTTCTTTTAAACGACCAGTTTCAAACACCTGCGAC  
ATCTACAGTTACACAGATATAGATTTAAAGTTTATATGCATATATCAAAGGTTTACAGAGACCTCGATAT  
TTAGGGACAAGTAACTAATTCGTGCTACAAAGTAAACATGTATATGTGTGTGTGTGAATGTTATATGT  
GGATGTGGTCTTTCTCAACATTGTCTTCTCAACACTGTACCTCTATACGTTAATTCATCTGAATCTTTT  
CAGAGTATTTTAACTCCACTTGGGTTTAAACCCTGTAGAAAAAGAAGTGAAATACTGTCCATATTTTACCA  
GGTGAACCTCTTAGGGTGTTATTAGTCTATTGAACTGATCGATGTCCGCAGGAAACAGTTAAACGTTAAAAAG  
GTCGTTTTCTTCCATCCACTCAACAGCAACTAAGAAAGTTTCTTCTCAATTGGATTTAAGGAAATATTAA  
GCTTTTCGAAAATAGTTAGCGGTGTTTTGTCTCAAACATTTCTCCTCCATACATCTTCTTCTAATAGGGTA  
TGTAACCTCGTTCTAGAGAACTTAGCGATAAAGCATATTGCAACCTATCATTACAGTGTTGTTTAGTGGA  
AACGTTTACCACCCCTTTTCTACTGCGCGTGCTTCTGGGAGACCTATGATCACCATATGTGCCCAAATC  
AGTTTTCTGCAAGTACGATGTGAGTGCAGGTTCTTCTCGAGGCTTATGTCTCGTGCATCTCGTGAAGGA  
CTATCATTTAAATGGGTATTTACGCTACTGAAGGTAAGAATTAACAAATCAGAAGGAAAGGTCAAGCTTT  
CCAGTCAATTTAATTTAATGGACAGAAGGATAAGATTTTTTTAGCCAAGATTGTTTAAATAGACAGAAGAA  
TAGAACTACCTTTACAGCCAAGTCTGTTTAAATAGAAAGAATGATAGGATTAACTTTTTAAACCAATTCAT  
TCAATAAACAGAAGGATAAGACTAAGTTTCCAGTCATGTCTATTGAATGAACAAAATATTTGGACTAGTC  
TCTAATTATGTTTCGTTTATTTATAAAACGGGACAGAATTACCTTTCCAATTACGTGCTGTTTAAATGGACAG  
AGTGACAGAAGTGGTTTTTCTAGGCGTTAAGTCCATTTAATGAGAGAGTAGAAAAAGACTAGCTTTCCAG  
TCAGGTTTGTTTAATCAAACGTATTCTAAATGAAAAGAATATATAAAGATTCTGTTTGAATATAACAATA  
CATTTGAATGTACTGTTTAAATCGCTTGTTTTTACTTACGGTTATTTTTTGCTCATTTGTAAAAGATAGTTG  
TTGACTTTTGAAGTCTGCATGAAAACTTTAATCACGAGGAGCCGAAAACGAACTCAAGAATTACAAAAA  
AAATTGAAATCGATGAATGTCTCATTTTAAATTAATGTATAAAATAATCTAGTTTCCCCAAACACAAAAA  
TCCGTTGATATTTGTTCTGTTAATTTAGTCTATTTATTCAAACAGCTTATTTTCTTAAACATGTCCAAA  
CACTTTAACTGAAGTAATAGTTTCTGCCTTCTTGTAAAGAGTTCATACTCTTTATGAACGTAGACAAAC  
GTAGATCAAACTTTTGTGTTTGGACATATCAAGTTCAGTGAAGTAAGTACAATTATGCTGTGATTAGGTA  
GATAGACACGTATAGTTCTATTGTTTTTGCTGCGTACTAAACACATGAACTTAAATCTATGTATTTATG  
TATCTTATTTCTATACAGCAAGAAATACGTTTACTTGAATTACAAGACAGCAACATTTTATAACCAATTAT

ATTTTATTTTCACTATAGTTTGTAGGCTTTAATGTATATTGCACAATTACAATGTAGCAGTTTCCCCAA  
GTATGATTGTGTATATATATATATTTAGAAAATGAACATTAAAAATTGCATTTATTAAAGATTTTAAAA  
GTGCTACAGGTTATAAACTATTGCTCGTCAATATTATTACGTGAGTTATATCTAGCTAGAAGAACTTTCA  
GCCGTTTGTTCATATCTTTTACTTCTCACTGTCTGTTACGTCACCCCGATCAAATTGAACTTTCTCTCT  
TTAAATTTGAGTAGATTCCAAAGATTGGAACGGGATGGTCTCAACACGGGATAGGTGACAACACTTCATG  
TTACTAATGGCGATATCTTCCAGAAATTCAAAAAATTAAATTTAAATGCTTTTTTAAACCAGATTTTAAA  
ATTAGTTTTGTAAATTTTCGATTTTAACTACTTAAATCATATCTTAATATTTATTAAATTCATCACTG  
TTATTCCAAAAAGAGTACAGATACGTGAACGAATGGCTGAAAGTTCTTTTTGTAAGTATAACCCAGATA  
ACAATATTGACTTTTTATGTGCAATTACCCATAACCCGTGTCATTTATAATAACCTTTAACAAATGATTG  
TTTTAAATAAAATGTCTCTTTATTAATGTTTATAATTTGATTTTGAGGAATGATATTGCCCTCACCTTCG  
TAGACGTACGTTCAAAGTTAACCAAATCAGTCTTAAGTTTGATTATTTTAGAAAGTTTGTGTGAATT  
TCGCACAAAGCTATGCAAGGGCTATCTGTGCTAGCTGTCCGTTATTTACTAATGTAAACTAGAGGGAAG  
GCAGCTAGTTATCACCAACCCACCGCCAACCTCTGGGCTACTTTTTACCAACGAATAGTGGGATTGACTGA  
TACATTACAACGACCCACGGCTGAAAGGGCGAACACGTCTGGTGCGACGGGATTCTATCCCGCGACTC  
TTAGATTACGAGTCGAATGTCTTAACAACCGCGCCTATTTTAGAAAGACGTAATGAATAAATATCTC  
TAAGCTGACATTTCTGTTTATAAATGAATATTTCTAACAAACAATGTGTTTCAATAAAGAGGCTCTGTAA  
TCTAACACCTAGTTTCATCAGGAAAGATCTTTAAACTCACAATATTTTCAAGAAGAAAGTTTGAAACT  
TAATTCAGTATCAAAAGCGAAGATCGTTTTGTGTGAACACTCAGTTTTAAATGAGATAGCTCTCTAAACT  
ATCCTTTTATTTCAAAAAATGAAGCTCTCTAACTTAACATGTTACAGGATACTTGAAGCTCTCTAACTTAA  
CATGTTACAGGATACTTGAAAAAATGTTCTACTACATATCTAAATAGCATTATCTCTTTTCTGGGAAGT  
AGCATATGCTTGTACTATATTTTTATACAGCAATGATAATGAATGTAAATTAGATATCAGTGTATAAGAT  
ATTGTAGGGAATAGTGAATACTTTCCGGAACATAATGACGCTTGATAACTGTATTTAAAAATATCTTGAT  
AACTGATTGACAATGACAGCAACTACATCGGACATTTTCTGTGACAGTTTGTGAAACATCCTGACCCAA  
TATTATATTTACAGTCACTCCTAACACGTAACAATGTAAATCTCTGTTTAAATATCAGCTACTAATTCAT  
TCACTGCCAGAGGTATGTTTTCTCTGGATTACTCCAATAAATTTGTGCTACTATTACAAAATGATGT  
TTCATTTCAAACTTTCTCAGTTTTATCATTATATAACTGAAATATTGAAACATATGGAATTTGTTTT  
TTATTTTGTATATAAAAAATGAACCTGGGACGGGAAGAATTCTTTATTTCTAAAAGTGTGAGTAAAAAAC  
ACTTTAAATGTTACCGACACACATATTTTTTTATGGGGTTTTCTCAGTGTTTTTATTCACTTTACATTT  
GCTTCAAGATAAGTATTTTCTTTGCTGATTTCTAATTTGCACAACCTCAGTATTTTGTATATTTATGTCT  
TAATATGTATATCTGGCTCTTGTGAACTCTTTGTTGCCGTAAGATTAATGTAATAATATCTTCATGAATG  
TTTTGTGTAGATAAATTAAACAGTATTAACCTGTATACTTTAACTCATTTTTTTATTAATCATTAGTTTAGTT  
ATTAATAGTTGAATGACTGAATAAATAGTTTGTTTTACCACATTCGTAATTTAACGCATAATAGGTTT  
TTAACTACGTCAGAAATAGGCATGTATTATGAATAATTAAATAATTAGGAAAGAATGAAAAACGAAATGA  
AGGAAAGACTCATTCAAGTATTTTTTTTAGCATAATGTAATGGCAAGAGGGTCCCTAGATATTATTAAACG  
TGATTAATATTAGATTATCATAATGATAACTTTTACGGAAATTAATGAGACGGGTGTGTTTGAGGGCT  
TAACCTGTGTAATGTAAATTATTATTGGCAGAAGGCTAAGCGTACAGTGTAGATGACCTAGATCGAGCGA  
AAAGGCAAAACAGATATATATTTAATTTACTGGCTATTCTGTTAAGTAAAAAGAAAAAAACACATAACT  
GAGACATTTTGTCTGTCTATACCTTATAGATTTTGACCCGTGTCGTCCTGGTCCACTCTGCCAGTCGTC  
TATCACTGATCCAGTTAGTTGGATGATGACATCTATGTTTCTTAAGATTATATGAAATATGCAGTTGAA  
ATAATGTGATTGACAATTCCTCACTTAACAAACGTTGTATCCGTATTATAAAGTTTGTTTATCCTTGTAT  
TTAACTATTTAAATTACAACACGTGAGGTTTAGGTTATGAAAATAGCAGTGGCTGTCTGAATGTTTAAAT  
AAACAGGTCTGCCACTTTCGTAGAACACCAATATGGTGTGAAATGTATGTTTAGCGATAGCTCTGTCTT  
CAAAAATTTTTACAACGTAAATTATCTTCTAAAGTCATTTGAACTTGACGATACGTTCTAGTAATCATAC  
GATATATTCTGCTGTAGATTACAGAATTGCAGATGAGCTGCTTAAGCGTTTTGTTATATTTGAACTGA  
AATAGAATAAGGCTTGACAATCACTTTAGAAACGTTCTGTATTCTTGTATTTTGATTGAGAGGATACAC  
ATACTAACAAAAGGAACTTTCAATGTTTTGTAAACATCGTTTATGAAGATATCTCAAAAGAAATAAAAAGT  
CTGACAGAAAAATGGCTCAGCTTTTTCTGTTGTATTTAATCTTGGAGTAGAGTGATAAATAAATAAATA  
ATATTTCAATTGAAATCATTTTTGTGTGAAGGTATTCCTGAGCAAGATCTGGTTAACTATTTTCATGG  
CTTTATACGTTATTATAGCATAACGAAAAATCTAGTTTTATCAAGGTTTCGATAACATTGAACAAAACCC

AGCATGACCTGGTAGCCGAGACACTTAACTCGTAATCTGAGGGTCGTGGGTTCGAATCTCCGTTACACAA  
ACATGATCGCCCTTTCAGCCGTGGGGCGTTATAGCATGACGGTCAATCCAACATATTCGTTGGTAAAAGAA  
TAGCACAAGATCTGAGGGTGAGTGGTGATGACTAATTGCCTTTCCTCTAGTCTTGACTACTAAATTAGG  
GACGTCTAACGCAGATATCTCTCGTATAGTTTTGCGCGAAATTCAAACAAAACAAACCAGTTTTTAACC  
ACCGATTTATATTAGAAAAACAAAACAGTTCGATATTAATTGTTGTACGGTGTGAGCTACAATTTTACT  
GGTTTTGATAAATTTCTTTGAGAATAATAGGTCTGACTGGGACCAGTATATATATATATATATCAAACCA  
TTTACAATCTATATAAATTTTATGGTTAATCAGGGCATACATTTAAAGTTCAATTTAAGGTTTGAGGAGA  
ATACCGTGAATGATGAATATAATACAGTTTACTTCGGACTCGACTATATTTTCTTCGAAAGCTTTGTTTT  
ATTTGTTTACAGAAAAGAAAAAAGCATGATATAATTGTGTGTTTTGAATTTTCGCGCAAAGCTACTCG  
AGGGCTATCTGTGCTAGCCGTCCCTAATTTAGCACTGTAAGACTAGAGGGAAGGCAGCTAGCTAGTAATC  
ACCACCCACCGCCAACTCTTGGGCTACTCTTTTACCAACGAATAGTGGGACTGACCGTCACATTATAACG  
CCCCACGGTGAAAGGCGAGTTTCTTTGGCGCGACCGGATTGCAACCCGCGACGCTTGAAACTAAACC  
TTGTGATGACTTTAAACTTTTCTTCGTGACTTTTTGTTTCATTTGACGATGTTTAGAAATGAAAAAT  
ATATTACTTTAAATATGAAATGTGTTTGGTTTACCGCAAACACACATTTCTTATCCGGATTATAACG  
TCGCAACTCCATAAACTTTCGGTTCACCTTCTGAGGAACAGAGAGTGTGCAATAAGGTAAGATGTAATTG  
GATAAAACCGTCAAACATAATGCCAGTTTGTTTTTTAGTGGAACCTCTGTATCATCTGGATTAGGCTAGCG  
TGTTCAAGTGGCTATTGTGCTGGACCACAGACTCGTGGATTCTGTGATTCACGTCTCTTCCCGCTAAAAAT  
ATAACTATACAAATATAAAACGACGATTAAACGCAGTTATTCCTGAATGAGCTTTTCGCGAATATCCGAAA  
ATAAAACAAATCACTTGATTTATAGATTTAAACGAGACAGAATATATAATCTCTTTTAAGAAAGCCTCATA  
AGCTATAACAATTCGGATAAAGTAGGTGCGACAGGTAAATCCTGTAGGTAAAACAAGATACTTTTCCCTC  
TATGAGGGTATTTCTCCTGTACCCCTTTGCCAACATTCTATGTTACTAATCTAATAGAAGAAGCAACTTTC  
TCGCAAGTTGAAACAAGTAATTTTCGCTGAGTTTCGCCTCCTAGATTTTCAGGACAAATATGTAATGAAGA  
AGTCTGGTTGATTATTTACATTTAAATTAAATATGACAAGTGAAACGCGAAGAAACCATGAAAAAGTGTA  
TCGTGTAATAGGTAAAAGTAGGGTATCCACTACATGTTTCGTGCTAAAAGCTTTTTTTTAATACATTATA  
AGGTTTTCGGAGATTTTCAAAGATAAGGAAGCCAAGGATTTTCACTCAGTTGTGTGCTGCAGTTGTAGAAT  
TTATAGTATTTATAAAACGTTCTTCAATATCCGAAAGTTTTAACTTGCATATTCGTAATGGTTCATTGG  
ATTTGTTTCTGACGTGTAAACATGCTTACGATCCTTTAAATAAAATCAACAGATAAGCCTACTTGTACAG  
TTTCAAACGTGATCACACATGCGCGTAATTAGCTCGTGAGTGTGGCTTTGTCTGCAACCAGGAAACAGC  
CCAATTTACTCTGTAACCTTTCTAAGTACACACTGGCGGTGCTTCCTGGTGTCTAATGGTAATAATGAGT  
TTGTTTTGTTGTTGTTTTATTTTCGCACAAAGCTACTCGAGGGCTATCTGTGCTAGTCGTTCCCTAATTTAG  
CAGTGTAACACAAGAAAAAAGGCAGCTAGTCATCACCACCCACCGCCAACCTTTGGGCTACTCTTTTACC  
AACGAATAGTGGGATTAACCGTAATATTATAACGCCTCCACGGCTGAAAGGGCGAACATGTTTGACGCGC  
CGGGGAGGCGAACCTGCAACCCTCAGATTACGAGTCACACGCCTTAACACTCTTGCCATGCCGGGTGAG  
GTAATAATGACTATAGCATTAGAAAGCCCAGTTCGTATCTCAGAGTATCTGGTATGGGTATTAACACTTT  
TACATTGTTCTTTGCTTTGTTAGTAAAAGTGTTCATACCCATACTAACCCTTTTGAGATACATTTGTATT  
TCAAGTGGGTTTCTCGTCATCAAGAAATTACAGTTAGATTCTGTCAGTGGGCCCATCACAGATAGTTTCAT  
CTTTGGGTTTTTGTCTTTATTTTGAAAAAATATAGAATTGGCATCATAAATTTAACTTAATAGACTTGC  
AGGTAATTAACAATATGTAGGTGCGCTGTATTTTAACTATAAACTACTGATAGAGGTCCTTTACATCT  
TCTTAATAAAATGGTGTTCCTTCAAACTATTTATGCACAAAATTTCTTGTAGTACATGTCTTTGTTCTTTACA  
TGGTGCCTAGTAATAAGTATATATACCAAAAATTTTCAATAAATACCATAAATATTACTATTAATCTCAC  
TGAATACTGCTGGGTTCCCTTATTACTATTAATCTCACTGAATACTGCTGGGTTCCCTTATTACTATTAATC  
TCACTGAATACTACTGGGTTCCCTCTATTTTAAAGAATGAGTGATTTACCCAGTGCTTATGTTTCAGCTCC  
TGACACTAACTGCCTTAACTGGTAAAAACATAAAATTACTCAATATGATGTATTATCTAGTGATCAACTG  
TATTATTAGAAATTATCTCCGTACATACAATAGGTTGGAATGTCTAGTGTTGAATTTATTTCAAGTTTAAG  
CCTCCTGAATGTATTTTCTTATAATTTTGAGAGTAAATGAATCATGTGCTAAATGTGTTTTTGGCAAAA  
ATTTGTTATTAACACTTTTATATAGGCTCGGCATGGCCGAGCGCGTTAAAGCATGCACTCGTAATCTGAGG  
GTCGCGGATTCGCGCTAAACATGCTCGCCCTCCAAGCCGTGGGGGCGTTATAATGTGACGGTCAATCCCA  
CTATTCTGTTGGTAAAAGAGTAGCCCAAGAGTTGGCGGTGGGTGGTGATGACTAGCTGCCTTCCTTCTAGT  
CTTACACTGCTAAATTAGGAACGGCTAGCACAGATAGCCCTCGAGTAGCTTTGTGCGAAATTCAAAAAA

ACAAACACTTACATATATAAGATGATTATGAGTTTAAATATTGATGACAACAAGACATAGAAAATGAGAAA  
TGTATTTTTTCTGTTCCCTCAGTATTGTTATTATTTATATATCAGACTATGGGACAATGATAACCAAATGG  
AAGTGAATATGTCTAAAAATAACGAACCTGGAATGTTTTACAACATCCAACCTGGGAAATTACCATCTGCAA  
ATATTTTCAAAGAACTCCATCTTCAACTAGATATGTATGAGGAAACCATTATCACACGTGTTCCCTCTA  
TTTATAAAGAAGACCGTTATGGGAGCAATACTGAAACTGACAGTAAGAAAGATAAAGCTGTATGAGAAGA  
AAAATATAACCATTTAATATCTGATGAACTGTGGTGGCACTTTGGTTGGTCATAAACCGAAGAGCGCAAT  
AATTGAAGATCTTTGGTATCAAAATAACTGTAGCAATTATTCCACACCCAATGGCATGTGTCAAATTTAA  
TCAGATTTTCAGATGCCATCTTTTTGATTATGCTGAAAATTAACAAAAAGATGAAACAAAGAACAATTTT  
GTACTAAAAATATCGTTTCCAGAAGATGGGTTTCAGACCCTCCAGTGTGTATTTCGTATTATAAAACAA  
GTAATGGTTTTTCAAATGAGACCTAAAACTCGAGCTCTTCTGAATAATTCATTATTCAGGAGAATAAAGAA  
GAAAAATAGTGAATTATTTGAAAAATACTCAAGTTTTGGGTTTGAAAGCTATTGTAACTTTTGTGTAACCTC  
CGTACGTTAACCTTCTCAATTAGAACCAAAAAATGTGCTCTTTAGGAGAAACTATTAAATATTCGGTGACAA  
ATGCTTGTTCAAAATAACAAATGTATTAAACAAAAAATGATGATGAATATAACATCAAACCTGGGCTTACT  
GGGTTAGTGACACATCCAACCTTTATAATATGCATACAGGAAGAATAACTTCCAAGAAAAACAAACTGAGG  
ATAAAAAAGGGGTGCGTTTTCAACTGAACAATTATGTATACATATGCGCGTGAGGATTTATGCCAAAATG  
AGCAAGACTCAATACAGACAACAAGTGCTTATTTTTAAACGAGTTAACTTGTACACTATAAACAGTGTTA  
TATTTTAAGAGTAGCTAATCTGCATAGCGGCATACATACAAGTACATTTGTTTTATCTGAGGAAGCCTT  
TCCACACGTGCACGCACGCCATATTTTTAACCAAGCAAGCTTTTTTATATACACACAAATGTGCTGCATT  
TTAAATTGAGAAAACTGTATGTATGTATATGAATATATATTTATATAGTTGTGGTGTAGTTTTTAATTG  
GTCGAGTCTGTACACAAAAATACGTCCTGCATTTGTTAACAGAATAATCCTGTAGATGCATACGTGCTTCA  
TGACTCTGTTTAGGAAAAGTCTTTATACTAAAGAGAGAGAGACCGATTTTCAGACATAAGTACGTCTGATA  
AAAGTAATATAGAAATGACCACGGGGTTACATGTCAATTGTAAAATTATGTAAAGAAGTGGACAATAATT  
AAATACGGAAATGTCAAGAAGAGTGGATATTCGAGAAATCCAGTTTCTAAACCCATCCTATGTATCCGTT  
CGTGGGAACCTTATAGCTGTTGGTATAGGAGAAGGACAGCCAGCGACCTCACTAGGTTTGTATGGCACAG  
CCACGTTTACAATAGACCTAAGTACGTTGTGCTATTAGAAAGCAATGCCAGCTTTGATAAAAATAATAGCC  
TGCTTGAGCATGGAAAAATAATTAGACACACACTTGCATACATGCATGTTACAGAGGTAAAAAGCACGTGG  
TTTAGAGTAGCTATGGGAATATTTAAGTTGAGAGTCGATTAATCATCCTTTAATTTTCATGCAGTAAGTAT  
ACATACAAATACATATATATATATATACTCGAGTGGGATGAAATATTGCCAGAAGACTAATTTAAATATT  
GACATGAGTTTTTGTGCGTATAAAAGACTTGAGGACTGGTGTATATTTGTATATACATATATTAACATGT  
GTACTTATCTGTCTAAATATACATACACATATGCATATTGATATCTCTATGTAATATGGTACTTTTTGTGT  
CAAAGAAAAACCAACACAAGTACACACTCTTCAGAGAAATTACACACCAACTTTTTGATAAGTGCTTTTA  
TCTCGTTTTCCCGAAAGACTTCTACCAGGTTGATGTCTGTGCACCGATCATTGATTGTTACTAAGTATAT  
ATACTTAGTATAGGGAACATAGTGCCCTAAGCTAAAGTGTATTTGAATCAAGTGAAGAGAAGCTTTGCGT  
ATGTGTTTTATGTTTCTGTGTAGAAACACAAGTAGCACCTTGTCCTCCAGCTGGATTTATTTATTTCTTT  
ACATTAAGCCAACATCTAAGATACACGTTTCAGATGTTAAAGTACAAGCATCAGCACTTATAGAAACACTT  
AGACACTTAGCTATATGTAGCTTCAATATACTACTTATTTCAAATATTTATAAAAAATCCATATAAGATT  
AGATACACAGTTGTTTGTGTAATGAGGTTATTGCGACTTCTACTTCTAGTTATTTATAACCAGATGCTAA  
TAGCAAACATTAGACGAAGAAATCTCACATAAAAAATTGCTTAATTCTTGGTCAACTTCGACTGTCCGTCA  
CTCAGTTTACAAAAGACACGCCCATTTTCATTAATTTTCATCTAAGAAACCTTGCTCTCTCGAGGCCAATTA  
GAGCGTGGTTTTGTGGAACAAGTGCTGTGCTGTTGTGAAAAAGACATCACAAGCACAGTGCACCTGATTGAGA  
ACGAGCAACTAACTACAATTAACAGCTGTTACTTTACATGAAATATCTCTTTTTTAAGACGTTTAAACT  
ATGTAGACATAACCTTACTAGCTTAGGAAGATGTATTTAGGATCAGTGTTCATGCAGACCACATTCCTTG  
GAAGGGAGTATCTTTTAAATAACACTGTGTACATAATTTTTACGTTTTCTTGTTTCTGGGCAGAAAGT  
GTTATGTCCCAGTTAGTTATGTGGAAAGTAAATGGAAAAGACCTTGTTTTCTCTTCAAACCTTGCATTTG  
TAACCTGGGTAGTGAAATTTTCAAATTCACGCATTTTCCAGAATATTCCAGGTAGATTTCAGTGTGAGTA  
GCTGATGGAGAATTTTCTCGAACTTACAAGAATTTTCAAGAATGTTGTAGGACTTTCTAGAACTTTCCAT  
AATAATATATATATATATATATTCAGGAGCTCACCATTTTCAGTTTAGTTCTAGCTGACTAAGTGAACACA  
TAGACTTATCTGATTTTATCAGAGATGGCATCAAGAACTGCAAGCATTCCTCTAGACGCATTTTGCTACA  
TAAGTGTCCAATTTATCAAGACAAGAGTTAAAAAATATTTTATGACAACATCTGCTAAAAATATGTGAATC

GTACAAGGCATATTTCAACATACCTGTCTGGGGATCAAGACAAATCCTGGGCACCTCATTTTACCAGCGAG  
CACTGCAAAAAATACTCTAGAAGGTAAGACGGACAATTTTTGCTTTCTTGAATAGTAAGATTTTATATTAT  
ACAAATTTTAGTCTTTTAAAAATTTAAATATATTTTAATTTATTTATTTTAAATTTCCAATAGTATAGAA  
AAATATCACATATAAAATATTTTGCTTGAATCTCTTACACATCAGTTGTGGATGAAATAAAATTTATCTT  
CATAATAATTTTATTTTGCTCTTTTGCAAGGGTAGTACAGAGGGGAAAAGAGAGTCATAAAATTTTGCTATT  
CCAAGAATTTAGAGTGAACCCACTCAAGCAATTGCTACTTCTGCATAGAGGACTCTTCCAAATGTCGGAT  
TGGCAAGAATGCTTTTGCTATCATGTATCTGGACCTTCCATTATCTATCGTTTCAGTGCATAAATCTCCCT  
GAGATCCCTGCATCCACTTCGCCAAAGAAAAATTAGCCATCCTCAGAAGAGAGCAGCAAATCAGAAGAGG  
AGGTAGACGTTAAAGATCCAGATTATAATTTCAGGGGTGCAGCTGGTAAGAGAAAACCCATACTACCTCAA  
CTAAAGATACCTCAAACCTTGATCAGAGATCTTGGTCTAACAAAGTCTAATGCCGAGCTTTTGACTTCTAG  
GTTCAAAAAGCGGGATTGTGGATGAAATCGTGCAAGTCGCAAATCAGAGGAAGTGTATCCGACATTTT  
TCAAGTTTTTTTCACTCGTCAAGTTGGGCTCTGCTTCTGCCACAATGTATCTGGTCTGTAGAAGCGACTG  
AAATTGCCTGTAACCCGAACGAGTGGCACATCTTCATTGATAGTTCATCCAGAAGCCTCAAAGCTGTCT  
GCTCCATAACGGGAATAAGTATCCGTCTTTTCTCCTGGCTCATTGGTGCACCTCAAAGAGGAATACAAC  
AACGTCAAGACCTTGATAGAAGCCTTGAAGTATGATGAGTATGGCTGGGAGGTAATCGAAGATTTCAAAA  
TGGTGGTATTCCTGATGGGTCTTCAAGGAGGTTTTACTACGTTTCCCTGTTATCTTTGTCTATGGGACAG  
CAGGGACACCGCAGCGCACTACAACAGGAGGCACTGGCCACAACGGACCGCGTTCTCTGTGGGGAGGCAC  
AATGTCAAGTATGAACCTCTGGTGGACCTCCTAAAGGTGTTGTTTCCACACATAAAATTTTGCTTATGA  
AACAAATTTGTTACAGCTCTTATTCCATACGTTGTCTTGGACAGAAGCCAAAGCTAGCGTCTTCGTTGGAA  
CACAAATAAAGAAGATCCTGGAGTGCAAAGAATTCTCCAAGAGGCTCAGTAGGAAGGAAAAAAATCTTGG  
GGCATCTTTGTTGCACTGGCTCTGGGCTTCTTGGGCAATCACAAGGCTGAAAATTATGTGGAACCTGTTG  
AGGTTCTGGTGAAGAACTATGGCAAAATGGGTTGCAAGATGTCTCAGAGGAGCAAGGCGAGTGCTTCCAC  
CAAGATATACTGGACTTTAAACGCCGCTACCAAGAAGCGTATAACAAAAATATGATGGGAGACTATATTT  
GGGGGCTGATACGTGAAAGTGCTTTACATTACTGTTGCAAATCTCAAAAACTATTCACTTCTAAACATT  
TTTGTATAATTTTAGTATAAAATATATGAAAATCTTGATTATATGTTGTTTTATTTCAGATCTTGTAATG  
AAAGTGTGCAAATTTGCAAATTTTACAAAGAAAAATAATTTTATTTAAAAAATTTAATTACTAAATTTTCAT  
TATCCAGGTCACAAAAGCAAAGTTTGAAGGGAATAATGGCCATTTTCTGTACTTTTACAACATAAGCAAT  
TAAGAAATAACACATACTATGCAGGAACAAAATTTGTATTACATGGTGTACGCACTGCACATAGTCACTT  
CAATTGTAACATACTATGCAGGAACAAAATTTGTATTACATGGTGTACGTACTGCACATAGTCACTTCAA  
TTGTAAACTGTAATCGCGAAGCATTTCCTACTAGATAGTTTTCTTACTGAAAGAAAAATTTTAGCTGTAC  
GGAGTGGACTGATTTTGAAATACATCATTTAATAAACTGATGCCACTGATGCTTCTTCTATTTCAAGGTA  
TCACAGTCTACAAAGTCAGTCGCTTTACCAAATAGATAATATCTATGTTTCCATTTTAAGGTATCATATT  
TTACAAGGTCAGTCACTTTAATAAAATAAATAAGATCTGTGTTTCAATTTTAAGGTATTATAGTCTACAAG  
GTCAGTCAGTTTAATAGATAGATAAGATCTATGTTTCCATTTTAAAGTGTCTTATTTTACCAGGTCAGTT  
ATTTTACTAAATAGATAAGATATATGTTTCCATTTTCAAGGTATCGTAGTCAATAAGGTCAGTCGTTTCA  
TAAATAAATAAGATCTATGTTTTCATTTTAGGGTATCATAGTCTACAAGGTCAGTCACTTTACTGACGCT  
GTTAAGTATCCATTGGGACAGATAATAAAGTTTCTTCAAATACTCAACAAAAAGTGTTTAAATAGCTATGT  
CTAAAGGGCATGACACTTTTCCACTCACTGAAATCGTTTTAATAATAAAATATTAAATCATTTTATCCA  
TAACTGAGAATTGATGTGGGCAAAGCACTAAGAAATTAGTGACCTATGTGAGTTGAAACTAAGTTATGAC  
CACCTTTATAAACAGAGAAAAACACAGTAGAAAGATACAAATAGAGAGAGCTAGATACATGCATGATGAT  
GTGAATTTATTACTTGTAATAATCTGTTAATTTAAATGCACGAGTTTTTTCAGGACATAAATCGTGTTTAC  
CTAGTTATTTTACGCAATGGTATCTCATTATGATGCACCTTAGGTAGCACAGCGGTATGTCTATGGAT  
TTACAATGATAAAATTAGGGGTTTCGATTCCCCTCAGTAGACTCAGTAGATAGCCCCATGTAGCTTTACTA  
TAAGAAACACACCCACATTCATGGTAGGATCTGCATTAAAAAAATGAAAATGAGTCTTGCAATCTGTGT  
TACACTTTAAAAAGAAAGCATATTAGGTTATAGATACGAAAGAGGCGAATAATCTGCAGTTACAAACCTA  
TCATTTAAACAGTCTTAAAAATAGATTCTATAATTCTCAAAGAGAAAAAAATGCCTTTAATGTTAAAGTTA  
AAATAGGAAAGAACTCAGATATTCTAATAATAAAAAACAGATTGTTTGGCTTATCTTCTCACAGCGGAA  
AAGTCCTAGTTTAGCATGCGAAAGGGTTTGTCTTTAGAAGTATTTGAGCTAACATTAAACATGTGTA  
AGAGACGTATGCGGTTTATTTCTTTAAAGTATTTGAGCTAATATTCAACATGTGAATGAGGCGTGTAT

GGTTTGTTCCTTTAGAATTGTTTGAGCTAACATTCATGCAGTAAATGAATGACAGATGTAGTTGAAAAG  
AGAAATATGTTGTCAATTTTAGAAGATATTTTGTTCCTTTTGTTCCTTTTGGAAATTGCGCACAAAGCTGCTCG  
AGGGCTATCTGTGCTAGCCGTCCCTAATTTTGCAGTGTAAGACTAGAGGGAAGGCAGCTAGTCATCACCA  
CCCACCGCCAACTCTTGGGCTACTCTTTTACCAACGAATAGTGGGATTGACCGTCACATTATACACCCCC  
ACGGCTGGGAGGGCGATCACGTTTAGCGCGACCCCTCGGATTACGAGTGCACGCCCTAACGCGCTCTGCCA  
TGCCAGGCCGTTAGAAGCGATAACCCGTTGTTCTTAACAAAGATAAGCTGTTTGTTCCTTGAATAATAACC  
TGTTTGTTCCTAACAGAAATAGCCATCTACTTGTTCCTTATGACGATAACCTTTTGTATTAAATAGATAATC  
TAAGAGAGTGGCGAACAAATACCACCAGACACCATGGTACACGAGTTTAAATGGATAGCGTTTATTAGC  
CATCTTCAATTTAATCAACCAGTTCAAAATTAGAAACAGATTTTAAAGCCTTGTGTGAACCTTTGCGG  
CAAATAAAGAAGAGTTAAACTGATGGTTTTAATTGAGATAATCCATTAATTTTGATAATTATAGTTTGAT  
TTGTAGTAAAGATTTTGTTCCTTGGTAATCGTCTGCCTAGGTAGTTCGGGCCCGGCATGGCCAAGCGTGTATG  
GAGTTCAACTCGTAATCCGACGGTTGCGGGTTCGAATCCCGTTCGCACCAAATATGCTCATCTTTTCAGC  
CGTGGGGCGTTATAATGTTACGGTCAATCCCACTATTCTGTTGGTAAAAGAGTAGCCCAAAGTTGCGCG  
TGGGTGATGATGACTAGCTGCCCTCCCTCTAGTCTTGCCTGCTAAATTAGAGACGGCTAGCGCAGATAG  
CCCTCGAGTTGCTTTCGCGGAAATTAACCAACCAACCAACCAACCAACCAACCAACCAACCAACCAACCAAC  
CCTTTAGATATGATATAGATAAAGGAAATCTATTTATCAATCCAATATATAAACAGTGGAAAAGTTACA  
CAGACAGGTGGTAGAGATGGAAATCAAATATTTTGTTCCTTATAGTGTCTTTGGTTTTATCGTGTTCCTGT  
ATTTCTGAACAGTTTCGTGTAAATATTAGAGCACAAACACAATTTATGTTCCTTGAATATTTGCCGTCTT  
ACAAATGAAGTGAACAAAGAAAGTGTCTTATTTAAATTTGACCACAACCTTTGTATGTAATACCACAC  
CGTTTTAATTTCAACATCATGACCTTTGACCTTTGCGTGTAAAAGATGAATTCGGAAAACACTTGATTT  
TTCGTAACATATAAACCAACTTAATATTTTAAATAGAAATGATCTTTCTTACTTAATGAATTTTATTTGTT  
TCAAAAAATAAGAAAGAGAAAACATACATGTTGTTCAACACTGGTGAGTTTAGTTCTGACAGTTTGTATG  
CTTGGCTTTCTGTGTAGTAATGACGTAATGTTCTTACTTACTTTCTGTTTCTGTTGTAAAAATTGAGGTT  
CATGTGTGTTTTCTCTGCAGGACACAGTGGTATAAACCAACTGGGAGGTATATACGTCAACGGTCGACCA  
CTGCCGACTCCACCAGACAGAAGATCGTAGAATCTGCTCACAGCGGCGCGAGGCCCTGCGACATCTCCC  
GTATTCTTCAGGTTTCTAATGGCTGTGTTTCCAAGATTCTAGGCCGATATTACGAAACCGGATCCATCCG  
GCCCCGAGCAATCGGGGGAAGCAACCCCGTGTGGCCACACCGCCCGTGGTGGCCAAAATTGCTCATTAC  
AAACGGGAATGTCCTCCATCTTTGCTGAGATTTCGAGACAGACTGTTGTCTGATGGAGTGTGCAGTA  
ACGATAATGTTCCCACTGTAAGTAATGTTAATTACCACTCATAACGTCTGTTTCTATACAAACCTTCTCT  
CGACACGTCGTGCTCAGCTGAATCCCTTTCTGACAACTTATGACAGTCTATTACAGCAATTCAGCAA  
ATGTGCACTGAAAATCTGGTTCTAATAAAAAGACGTAAATGTAACCTTATGATGTTATTGTACACAA  
AAAGATAAAAGAAATAAATAACACGCATAAAAATACACTGGCAGACAGATATACACAGACGGTTAAGATG  
GTTGATAAATATTTTCACTCTTTCAGACATTTCAAATCATCAGAAAGCCACATTAGCAAGAT  
AGAAATCTGATAAATACTTTTATTTTGTCTACATATTATTTTATACGCTTATTAATATCAGAACATTCT  
ATTCCTCTCTATGTTCTTCTAATCAGGTAAGACCTATTATATTATTCACCTTTCTTCTTATGTACATATGT  
ATTAACCTATCTTTGACCTTTAATATAATTTGTAGTATTATCAACCCTCATGTTGAAGTTCTGTTGTTTT  
GTATGAGAGTTTGAATTTGAATAATTTTGTCTACGTTTTTCACTTCTTTATCGTATTGTTAGTTCA  
AACGTTTGATATTTTATCTATTATTTTAAATCATTTAAGATACATGCTTTTTGCTTTGAAGGTATATT  
TTATGACCATAATAGTTTCCACATAAAATGTAAGATATCAGGTAAAAGTTAAGCTGCTTTATTCATC  
AATTGAACATGCCATTAAGAAACAGCAAAACGCCAACCCTTTTATTATTATCACAATATCTGTTACTTTG  
GACATGGCAAAATAATATGTTATCACAATATCTGTTCTTTTGAACACAATACAGAACTGTGATAATATCG  
CAATATTCTGCTTTCTTGAAACGGCAATATTTTCTCTGGAAAACAACACAATATATATAAAATATATAAA  
CAATATAATATAATACTGTTTTCACAATATCTCCTTTCTTGAACACAAAATATCTTTCACTATTATAGA  
AATAATATTTCTTTTAAACTCGCTTTTCTTATTTGACCATGCATTATTCAGAATTTAATTTTAACCTA  
TGTTCTTGAAGTAAAAGTATAGGTAAAATCAAAGGTAAATATATATATATATATATATATATATATATGTTGT  
TTTTGAACACAATGTTAATGTTTGTGAGTTTCGTTAATATGATTTTTTTTTCTCAATTGAGTGATGGTGG  
CCGTTTGTTCCTAGCGAAAAGCTACGTAATGGGCTGTCCACGCTCTGCCACCACAAGAAATCGAACCCAG  
GATTTTAACGTTATAAGCCAGTAAAGTTGGTGCTTATCCACTGAGAAACATTTTCATGATGTTTATGTCT  
GTATCATTCATTATTTTGTACATTGCTTTTACTAGTATTTGGCATTTTCAATTTGTTTCAGCACATTA

TACAATAATTGGGCCGTACAGAAAGTTCAGGAATAACCGTCCCTAATTTGAAACTGTTGATTATAGGAAGA  
TCAGATGAACAGAACTCATCGCTTACACAGCTACTCTCAATTTGAACCAAACAGTGGAATGGAATTTTAC  
TTTCAAACGAGATCACATATCTCGGGCGTTCCAATCTGCATCACGACCCAAAGTTTTACTACACGACAAA  
AGACAGTGTAAGTAATCAGTTTAATTCACGTGAAGGTTAAAAAAAAGTAACACTTTAGAAAGTAAT  
TACATATTATTTACTTATACATAATGTATTGAAATCCAAATTTATTCCCTCGTATGCCATCTATGAAACG  
CTGACGATTATAATAAATAATGCCATGTAGTTCGTTATCTGTTACCATTATTTTAAACATTAGATATGT  
AAACCAGCCGCTTGAGGTTGCTCAGAGAACATGAATTTCTGTGACCTACAATTGCCGTTAATTGTTGTGG  
GATCGATGTATTGATGAAAGGATGCACTTCCACCATTCTCACACACTGAAGTAGTGAGGATGTATATACA  
GATCATGCTGGCTTCCTGTTACGGTCTTATTGGTATCACGTGATTTCTCATTTACACAATAAGCTAGTTT  
ATGGCGGCAATGAGAGGGCACTCACATTCTAAAGGCAAAGTAGCAACAAGGTAATTTTAAACCACCACT  
TAACATTGTCTGTTGGTTATTGTTGTGCTGTAAGGAAAGGTAGCGAACTTTAGAAACACCGCTTTATAG  
GCTGAAAATATGAATTGTTACTTTTATACGGTATTATACCCATACGAGTAAATCGTATTAACTACTATT  
TGAATTGCTTTGTTTTCCCAATATTTTATAATTAATATTAAATGTTATTACATTTAGTAATCGTTAAGAA  
GATACATAGAGAACTTATGTACTTAATTCAGGAAATTAGTTTATAGTTGATAGCTAGTTTTGGTGTAT  
AGGAACTTATTGTTAGCTGTTAAGCACAGAGCTACACGATAGGCTATCTGTAGTTTATCTACCGTTATT  
TAAAAACCCAAATTTTTGAGTTACGAGATCTCAGAATTACGCCTGAGCCACCGGTCGACAATAGGAAAAA  
TCTAGTGATATATTTAATTGGTTAGTTAGAATATTTTTTAAAATATTATTTTATCATTTTTACTAAACCA  
CAATCAATTAAAAAAGAACTTACAGAATTATTTCTCAGAAAACTGGTGTTCCCTACATCGTCACAAT  
AGTTTGTGACCTTTCATTGTTGAAACACAATGTGAGTAAAGCCTTTCTTAGTTTCACTATAATTTGTATA  
CACGTGTTTTCTTCAGAATTTGTTTTACCAACAGGTGCATAAACGTTTCATATTTGTACGACATCAAAG  
CTTTTCGTAATAAAAAATAATTTTTAAAGTTTATCTAAGCTAGTAGCGAAGTTATTACAGCAAGTACTGTT  
AGAAAAGTTAGAAAACAACTGACAAGCATAGAGAACGTATAACTTAAAAGATAACCATAAACATACAAC  
TTTGATAACTTATAAGATATTTATTAACATACGCAATGATAACTAATTAGATAACTATAAACATTCAACA  
TTGATAATCTATTAGATTGCCATAAACACAGGGCATTGACAACCAATAGTATAACGTCAAAGATACAGCA  
CTGATATTATATAAATGACTATATATAAATGGCAATGAGAACCTATTAGATAACTGTAAACATAGGGCA  
CTGGCATCTTCTTTTATGGCCAGATGGTTAAGGCATTGACTCATAATATGAGAGTCGCGGGTTCA  
AATCCAGGTCACACCAAAACATGCTCGCCCTTTCAGCCGTTGGGACATTATAATGGGAAGGTCAATCCAC  
TATTCGTTGGCGGTGGATGATGATGACTAGTTGTCTTCTCTAATCTTATACTGTAAAAATTAAGGACGG  
CTAGCGCAGATAGCCCTCGTGTAGTTTTGCACGAAATTCAAAAACAAACAAGTAGCTTTAAACATACGGC  
ACTAGTAACCCATTACATCACTATAAGCATATGATATTGAAAAATATTTTCATAACTATAAACAAACGGTA  
TTGATAACTTATTGCACAGTTACAAAATAGAGCATTTGTAGCTTAATGGATCACTCATCCGGCATGATAA  
GCTATTTTCATAACTATAAACAAACAATAATGATAACCTGTGATATAACTATAAACATACAGCATTGATAG  
CTATTATACAGCTACAAGATGTATGTTAACGAGGTCTCTAGAAGTGTTATGGTTAACTATTATACAGCCA  
CAAGATGTATATTCACGAGGTCTCTAAAAGTGTTATGGTTAAAGAATAAATAAATCCAAGATTAAAAGTA  
ACAAACATTTATGTTTCTTGCAATTCAGGTTCTGATGTTATGCTCTGTCTATAACCTACAGAGTTTATGAT  
TCTTCTCGTGATTCTGTGGCATAACGACATTTTATTGACGTCACGATAGTACAAAATGTAACATTAAGCAT  
CTCTTATGTGACGTTCTTTAATGGCGACCAACTGACAGACAGCACACTACTGTATTCTGGTGCGAGTGA  
TTAAAACAGGTAACCCCTCCAAGCAACCTTTGACCTCCTTTCTGTGAAAATAATAATTGAATTAAATTTATA  
ACAACAATGCTGAAACAATCAGTGATTTTCAATTAACGATTCATTAATTTAGAAATTTTATAAATTAAGTAAA  
AGTGCGCTTGATACGCCATAAATTGAATAACTAAAATTTTATATGAATTTATAACTGTGGGAATAATGAT  
CAGAAAAAAGACGAGCAAAACAAAGAAAAAAGCAACTGTAAGAAGCAACATGTAATTTAATCATTTGTAA  
ACTATTTTAACTCAGAGCTTTCCTTCTTGGGTTTTCTCATCAGCAAACCTTTACTGAGCTTCAGAAACAA  
TCAAACATGAAAACGAGGACATTGTGAAGAACTTAATTCAGAGTTCACATGATTTACACAATTAACCAA  
AATGCCTTTTCTGCACATATTGATATAGTTTTTAGATTTTCGGAAGAGTTAGCTCTGTATGGCTTGTCTG  
TATTGAGCATCTGTTACGCGTGACGTAACCATTTGTATCTTTAGGTATAATCAATGCAACATTTAATCA  
TGTTATCTGGTTGGTGGTAAGTCACTAACAGACAGTCATACTTTCTTTGTTCTACATACGTGAAAAAGC  
TACCCCGTTGTTGCTGGGTCTTGCTTCGATTAGGTAATGTATTTAAAGTATAATTTAAAAAACTGATTG  
TTCAGACTACATCTTTCCTCATACTGTTTTATCTGTGATCAGTTTAGGAAACAGGAATATCACAGTATAT  
TTTATCTTGTCTCTTGGCATGCCTCTAGTTAAATAAACGCTATTTATTAGGTTGATTTTAGGATCTGGT

TTATGTGATAATTTGCTTTCATCAGGACTTATTTTTTTACTCCTTTCAGTGTCCACGTTCTTGTTTTGGA  
ATTTTCGCATAAAGTTACTCGAGGGCTATCTGTGCTAGCCGTCCCTAATTTAGTAGTGTAAGACTAGAGGG  
TAGGCAGCTAGTCATCACCACCCACCGCCAACCTCTTGGGCTACTCTTTTACCAACGAATAGTGGGATAGA  
CCGTCACATTATAACGCCCCACGGCTGGGAGGGCGAGCATGTTTGGCGCGACTCGGGCGCGAACTCGCG  
ACCCTCAGATTACGAAGCGCACGCCTTAACGAACGCGCTAGGCCAAGCCTGGCCCGTCCACGTTCTAATC  
TATAATAAGAAAATTAAGTACTTTCATTAGCTCCACAACCTCTTTTAAGGTAGACAAGAAAAGCTCTGAA  
AATCGTTCTTCATGTTATTTAATATGTAACATAAACTGTGATATTGCAGCATCGATCAAAAAAGACGTTT  
TTCTTAATAGAAGCCGAGTTAGTAACCTTATAGTTAATACTAACTGTTAACGTGTTTAACCTTATAATTACTA  
ACGCAATAAAACAACGAAATATCAGATTTAATTTTAATAAAAGCTCTTGGGACAGCACAGTAATATTTTTTA  
CTGCATACAATTTATTTAATAATTTTCTGGAATTTAATTCTTAAATATAGTTCATAATGTTTTTTATTGGT  
TAAAACCTTAATTTGAATTAATTATTTTGCACAAACTTCCATCCAGTTAGTAAAAATGATCATTTGTATT  
CTGAGCAGTTTGTCTCAAGCCTAGGGATGAACGATTAACATCAATTTCTCGTGGTGCATGAACACGTGC  
GACTCTCTACAATGCTAATGTGGACGGAAGAAGGCTCTGGTCTGCCTCACGTCAATTTGTGTCCCTAACTT  
ATACTTGAGAAATGATAAAAAATGGCCTAATAAATCCTACGAATTCATATGTTTGGGCAATATGCTGAAGA  
TAGCATGTAATGATTACTGGTACATTGCAATGAATAATTCAAGACATATATATAGACAAAGATATACAT  
GAATAGAAGAGACCGTGGAACCTAAGATTATTGCTTATTGTCAATTAAGAATAAGTGAGAGGAGATTATAT  
AATAGTTTGTCTTTAACAGAACTTTAACGTAAGAAAGAAGTTTACTTCTTAAAAATGTTTTATTTTGAA  
CTGGTAAGTTTGTTCATAGCGAATATATGTGTTTGAGTAATTTTACTTTTTTACAAAAACGATGGAAC  
TATGTTTCTGAACTGTAAATGGATTTTTTCGCGCTAACAGAGACTGAAAAGACCAGACATCTCTTTGGTTTT  
AGTCCTCATGAGTATAAAAACTACAAATCAATAACTATTAGCGGCATCTTATAAAGTCCTTCGTTGTTCCTA  
TAAAAGAACTGTCTCGTTTCTTTGTGGTTAAATAATCGGCATCCTGTATCTTATTTCATTGGAACCGTT  
CACCTCTGCCCTTACCTTCTTTGATCATACTATTTTTTCTATAGAAAGGAAGTGAACGCCACTTAGT  
AAACAATAACATAACTTTAACAGCCACGTTAGACTTAATCCTTTTTGAATAAACTTTTTTACATGACACAC  
AGTGAACCCGTTAGAGTACAGAAAGTGTGGCTAGCTTCAAACATGGACTCCCGTGGCGCTAAGAGACAT  
GGATTTGCTCAATCAAGGACTTCTGATTCTCCAACCTAAATTCCAGAATGAGCACGAAAAAATGTGAGA  
GGTGGTAAATGTTTGTGGTCAGTTCTTCTTCGTATATTTACTACATGTTGTTTGTGTGTTTGATCTGGCT  
TCTTCAGTTTAGGAAACACAACAAATACGAATGCCTATTCAGTAAAGAAATTCCTCCACAGTTGTTTTGT  
CAATGTCACGTAAGAGGATATTTTTTCTTCAAAATATGGAGATTTATATGCGTCATTCAATGACACGGAA  
CACTGGTTTTAAAACGGTATATGTAGATATAGGTTATAAAATAATTTAATCATTTTTATAAAAACTTAAAAAT  
CCACCTGTAGCGAAAACAGGCGAAATAGACAATTGAAATCAACGGTCAACTGAAAGGTAGGAGCGTGAAA  
AGGAAGCTTGGTAGCTCCACCAAAGGGAAGGTGAACAATAAACTTTAGAAATATCACCAGCTGTCTGACG  
ACACCGACGTTACTTTGTAGCAAGGTGTTCAAACGTAAGCTCTGCCGCTACAGGTCTGTGGTTTGTTC  
CTTTTGAATTTGATGCTAAGCTACTCAAGGGCTAGCCGTCCCTAATTTAACAGTGTAGAACTAGAAGAAA  
GGCAGCTAATCATCACTCACCGCCAACCTCTTGGGCTACTCTTTTACCAACGAATAGTGGGATTGATC  
GTTACATTATAACGCCCCCTACGGCTGAAAGGCATGTTTGGTGCACCGAAATGGAAACCCGCGACTCTCA  
GATTAGGAATTGAACGCCTTAACCCATCTGGCCATTCCGAGCAGAGGTCTGTGTTCCGGCTGCTTTGCCAA  
GTCATTTCTCCTAAACGCAACATCAGTAAATATCTTGACGTCTTTTTCACGTTTTTTTGAAGGAAGACAG  
AAACAAAAATGTAACCACGTATGCTAGAGAGGCAGTTTGTGATAATAAACACAACAGTTCTGAATTTTAT  
ATGATCCTTTATACACTGGCGCAAATTAACATAATCGTTTTTAAATGCAGCCGCGTTCTATATTGTACAAA  
TCAATCTAACTTTCTCTGAGTTTAAGTTGGTACTGTTACATTTATCCACAGTATCTTATCCACTTGTAG  
GTGTTAGAACTTGATACATCTATCCAATACTGTCTTATGTATTTGTAAGTGTGGAACCTATTACATACAT  
ACACGAGGGTGCCTTATACACCTCCATATGTTTGAAGTATTACTTCTATTCTTTAAAGTATCTTACTCAA  
CTGTAGGTATTAAAACTCTCCGACAAATTGTCTTCTGCACCTATATATATATATAGGAACTATAACATCT  
ATTTAATAAAATGTCTTACCTACCTGTAGGTGTTAGATATATTACATTAATCCAAAAAGGTGTTTTAATC  
ACTTGTAGGTGTTGGAACCTGATAAATAGCCTTACTCAAATATAGATGTTCAAACGTTTACGTCTATTTTA  
TTGTGTTTTAACTTACTATAAAAACAAAAAATCAAAACAATTTAACTCACGAGGTGTTGGAAATTTTT  
TTTCTATCCAATAAGGTGTCATACAGAATTTTGAACTATTATATCTGTATCATAAAGTGTTTTTATTAC  
ATACATTTGTTAAAAATTACTACGTTTATCTGATAACATATTACAATAAAATATAGTTGTTTGAAGTATGA  
TACCTATATGATTGTGTCTTACAACTTTTAGCTGTTAGATGTATTACATCTGTCTGATAAAGTTTCTGAT



CTAACAGTATATTTTGGGACATTTTAAATCCATTTGATAAAGTGTCTTACAGCTTATAGGTGTTGGAAGTA  
TCATGTCTATATTTAAAGGTACCTTCTTATAGATTTTGTAGAAATATTACATTAATTTCTATGGAATCTTTTA  
TCAGATGTATATATTTAAGCCATTACATCCAGTTGATGATGTCTTATCCATTTATAGGTTTTGAACCGCA  
ACAATTGTCAGGTAATGTTTTGGTCACTTGTTAGATTATCGCATTCCATCCAATGGAGTCTTACTTGTATAA  
ATATGTTGAAATTATTGCATCCAAAGGAGACAGTGAATTACTTACTAGCAGATGTTAGAACAATTGCATC  
TATCATGTAATATGTCTCACTTGAGTGTAGGTTTTGTAGCTATTACGTCTACCCAATAAAGTGTCTTACT  
GAATGTAGGTGTTGAACTGTAACAGCTATCTGATAGTGTCTCACTTGTTTTGTAAGCGTTGTAACCTATTA  
AATCGATCCAGTGAAGCATTTTATGTATTAATGTGGGTGGAAGTATTACACCTAATCATGAAAGTTCCC  
ACTTTTAGGTGCTGAAAAAATTAATTTATGCGATAAATGTCTTAACCACTTGTAGTTGTTAGAATTATT  
ACATTTATTTGACAAAGTGTCTTTCTAGAAATTGATATTGGAACCTCGTGCATATATCCAATAAAATGCCT  
TACCCACTTGTAAAGTGTGTAACAATCACATGTACCTGACAGTGCCTTTAACTCTTATACGTATTCAAAC  
TGAATAGTCTCTCTGAAACGTACGTGTTTGAACCTATTTGAATATATCCCATAATGTCTTACGTACTTACG  
TATTACAAGTATTACATACATCCCATAGTTTTACACGATAAGTACTGGAAGTATTACATCTTTTCTGAT  
AAAGTGTGCAATAAAATATGTGTTTAAACTCTTATGATATCTAGGTGATGATATCTTACTTACGAGTAAG  
TGCTAAAAATATTACATTTATCCGATAAAGTGCCACATTCAAATGAAACCGTTTGAACCATATGGATGTC  
TTTGTGGATGTTGAACTATTACATATTTCTGATAAAGTGACATATTAATGTAACGTGTGGGAACCTACT  
GCATCTTTCCAACAAAAGTACCCTCAGTTGGTACAAGGACCATTCAAGTTATTCAATAAAGAACTACACT  
GAAACGCAAGGGTTGATTTATTATCTGTATTGAATAACGACTTACCCACCTACATATGTCAGAACTGTT  
ACATTTATCCAATAATAATTTTATGCTCAACGTAAGCGTTGGGACTATCATATCAATCTGAAAAATGTGTT  
TTAGCCACTTGAAGGACCGACTTTGTAAATTCATTGATAAATGTTTTTACACACTTGACGGAGTTGAA  
AGTACTCGATTTATTTCGATATAATGTCTTACTTACTTATAGGTGTTGGAACCTATTACGTCTATGAGATAG  
TGCCTTATCACATGTATGTATTGGAACGTGTACATCTACCCGATAAAGTGCTTTAATCAATTGTACTTAT  
TACATTATTGTTATTATATCTATCCGATCGCTCGTATGTTTTTGAACCTATTACTTATTCCATTAAGCTTT  
TTACTTTTTTATTAACTGTAGCTATTGCAACTATCCTATAAAATCTTACTTTTAGGTGTTGGAACCTAT  
ATTATCTATGACATAGTGTTTTAGACCTTTGAAGGTGTTTGAACCTATCTAATAAAATGCTATACTAAAA  
TGTAAGTGCTGCAACTATTATATATATCTGATAGTGTATTACAGATATGTAGGTTTTAAACGTGTTCCAT  
CTATTTATTAAAGGTGTGTAACCTACGTATAGGTGTTAGAACGATCACATCTATGCAATAAAGTAGTTTAC  
ATAAATTGACCTATTGGAACCTATTATATTATAAAATATATTTCTGTGTACACATTAATTGTAAAAATTTAAAAA  
CTTGTTTTTAAAAATCATTTTATTTGTAAATAACATCAACTTTTTTACAAAAAATAAAGTTTTTCTGTTTAA  
TACTCTTGAGAGCTAAAGTACGGTGTATAATTGTATTTTTTGTTCATAGTGCATAATACCATTGTCACGA  
TTTACAGTGACAAACACAATTAGATATGCAATTATTTTTACACCAAGCTACTTAATTCGTATGCTGATAA  
TTTGAGGGTACTTGCGTATAACAATCGTGAAACATATTATTTTGACAGATTGTTTACTGAGTAGAAATA  
AAACCATGAGAGCTAACGTGACGTAAACAGATGATTTTATTTAGAAATAATAGCTTTACCGAAAATGTGTA  
TCAATTACTTTTACGTGATAAAGTATTTTGTGTTACATTACAGCTAATAAATTAAACGAACCTTAGCTTGA  
AAAATATTTATTTCTACTTAACTATATTCTCTCTGTTTATTTAGTCGTCGAGTATGATTTATTTCTATTT  
AATGCCCTCTTTCTATTTGTTTTCTTTTAAGAAGTTCACTGCTCGGCATGGCAATTAAGGCGTGCGACTCG  
TAATCTGAGGGTTCGCGGGTTTGCATTCTGTGCGGTCAAACATGCTCGCCCTTTCAGCCGTGGGGGCGTC  
ATAATGTTACGGTCAATCCCACTATTCTGTTAATAAAAGAGTAGCACAAATGTTGGCGGTGGTGGTGATG  
ACTAGCTGCCTTCCCTCTAGTCTTACACTGCTAAATTAGGGACGGCTAGCCCTCGAGTTGTTTTGTGCGA  
AGTTCAAAAACAAACAAACAAATATTTGGCGTGAAATAATGTGTGATCATTAAGTACTTTAGGGAGCCA  
TCTAGCGGCGATTACAACGTAGCAGCTCAAATATTCTGCGCTTCATTAAAGAAATAAACTTTTATTC  
GTGTTATCATTCCTTCCTTTCAGAAATATTCCGAGTGGAATCAGCTTCTGGCAGCGCCAACACTGCTGGA  
TAAAGCGTTTTAGACAAATTGAGTAAATAATTTTATCTGAATGTATAGAATTAGTAAAAATAACCTGACC  
GTTTTACAGGTGGTTATTTGACTGTGTAAATCTGTTATATCATTAAGTGCCAATTTGATACTGTTGTACT  
GAAAACATCAACTTATACAGAGCAATCATTTTACATTGTATTTACCGAGAACTAACCCTCTGTAAATG  
GTTTATAACGTGAATTTATCTGCCATATACTCATATTTGTTTTATCAGGCTATCTTTCAATTTCTACTTT  
ATGTTGTAGAGGCTATGGTTAATTTTAATTTGTTTTTATTACATAACATAATATGTATAATATTGTAAA  
TGATAGATATAACATGAAAAATAACAAAATATAATAAGTCTAACATGAAATGAATTCAGTGATTAATAT  
GAGTAAGAAGACACAATAGAGTTGAAGGTATACATACATATAATGTGAACTAATAACAAGAAAGATATG

CCTAACACTTAAATAAGTGTTTTTGGCATTTCCTTTGGCATTAAACAGTACAACAAAGAATATGTTTAAATG  
TAAAATGAATACAGTCAAAATATATATTGTGTTAAAGGAATGCATTAAAATATGTATATATGAAACAAAT  
GAAGTGGAGACACGTTTGACATAAAATTAACACAATGAATGACACGTAAACATAAAACTGTACGGTGAAA  
GATATATAATATTAAATATGGCAGTTAATCGTATGTATAATGTATTAAAGAAAATGAAGCATAGTAAAA  
TATATGTATACTATAAACGCCGTGACAAAGAATATCACAGCGTAAAACTACTATGGTCAAGAATATGTTT  
AGTATTTAATATTTTTATCATAAAAGGTACGTTTATGTGTTTGTTCAGCATAGAGCTGTAGAATAGGCT  
ACCTTTGCTCTATCATTAGCATAGAACTGTAGAATAGGCTACCTCTGCTCTATCATTAGCATAGAGCT  
GTAGAATAGGCTACCTCTGCTCTATCAACAAGGGAGCATCGAACCACAGATTTTAGTGTTGTAAGTTCTT  
ACCTGAGAACTGAAAGATATATATAATGTTAGTACGACAAAAATGCATGTAAAATACGACATTGTTATCT  
TATTATCTCATAAACGAACTAGTATACTCGTAACTGTGTTATTTTTTAGTTTTGATATATGTTGGAGAG  
CTACTTTGATCAGCATTTAATGTTAGTTAATTAATAAAATAAGTTTTGAAATTCCTTCTTCTACTACA  
GTTTTTCGTCGATTAATCGAGTTTTACGAAATCTTGCGGCTAAAAAGGAACAACAAGCACAAAGATACTGTT  
TACGATAAATTGCGCCTACTTAATGGACAAGGTTGGCCTCGTCCAAACCCATGGTACCCTGGTAGTGCTA  
CGTTTGGTGGGATAACACCCGCTTGTATTCTCTCCTCCAATCACAGTATCAGGACTCCCCAGTGACAGTGG  
CCAAGTCCAGAAAAAGGTAAAAAGTTTTATAATTTCTTATATAATTATCATTTTTTTTATGTTTATCTGA  
CAAAAACACAACAGTAACAAAAACTCTAATATATTATCCACACACGAATAAGTTCGAAGCAAATTACATA  
TCGGTGGTTTTGTTTCACATGTTATGCACGTTATTTGAAATCCGATGAAAAGTACTGCAAAGCCAATATA  
ATAAATGTTTAGCCCTACTTGAAAAACACAGGCTCAACTGTACGTGACGTATTTAGTAAGTTTCTTTAT  
CTGCGTTCTCAAAGCTTCGTTTCATCTTTCTTTGTGGAGAAAGCATACGAAATTATGTTTCGAGAAATTTAA  
TGTTTGTCTTTTCAAATTTCAAAAATATCTTTGAAAATTCTAATGCCTGATCAGGAGCAGTTATTTTCAG  
CTGTTTATTCTCGCTTATATTGTGACTTCTATTA AAAACCTTTTCTCTCACAGTTTGTGCTAGAGAGAAT  
AACCGGGTAAGATACAGGAGACCTTGATTTACGAATTACTAGTTGAATGTGTTTCTCAAAGCAAGTTTTA  
TGTCAGAGGTGTTGGAATGAGGGTTTCTAAGAAAAAAGGAACATGACTGAGCAAATTCGGATGAGCTAA  
CTTGCCATAATTATATATAGGATAATTAGTAGTAGTATCTCATGAAATGTGTGTGTACTTTGTCTCTGCA  
ACTTTACCTTTACCTCACTCAGTAGCTTACAAAATATAACCAATTTACAAAGCCGAGTTCTTTGTGACGT  
TTGCTGTGTGTAGTATGTTGTACAGTGTCCCCTCTTGAAGTATAACGTGTCAACCATTTAGAAAAGGTTA  
CGTATAATTTATCATGTTTAGAAGTTCCTGTAGTCTACTGTGTTTCTCTGTATTACAGTGTCTTTCATCT  
TATTCATACGCATTTAATGTGTTGTCTAGGAATACAATGAGCGTGCCTGTCTTGACTTAATACTATTGTT  
TACATAGTCTCAGAATTAGATCATGTCTACTAGTTCATTGTTATTTTTTTAATCCACTTGAAAAAGTCT  
TTGCTGATTATATACCACGATAACAAAAGCTTTGAAAAGTGCGCATGGATGAAAACAGTATCAGACGCTA  
TGTAATAAAGCTGAAGGTAGCTGTAAGGATAAAATGAGGAATAAATTGGAATAAACTCACTGAATTTTAC  
GCAC TTATAAGGTGGTTTATTTGTATTAATCCTAATAAACAACTGATTTCTTAATCTCTTTTGCACT  
GAAAATACCTCTATGCTGCAGTTTGTTCATGGGTATCGATGGCTAAGATAATTTGTTTGAAATTAAGCA  
CAAACTACCTAATGGGCTATCTCTGCTCTGACCACCATGGGTATTGAACTCGGTTTCTAGCTTTGTAA  
GTCCAATATACTGCTGTGCCACTGGTGGGCAGGCTAAGATAATACAGAAAATTTTGGGTACGGTTGTCGA  
TGGCTAAATTAATCTAGAAAAATCACTTGGCCAACGCAATTATGCTTAATCAATAAAAGAAGACATTATAT  
TAAATTTATAAAGAAAAGAAAAATGACAAAATTGTTATAAAAACTATAAAT'TATCAATGAGCTAAATGTGA  
AATCTTCGGAGAAATATCTTCTTCACATTTATACAAATCTACAATAAAAAGTTTTTAAACTCCAACAACA  
CGTTACTCAGACAAAATGCGCAGTTATTGTTTTAAACAAAAGACTAAAACCTACTGGGAAACTTAAGTCGTT  
ACAACCAGAAAAATTTTCACTAAAACCTTTAAACTGAAACACTGGTAGATTTATTTTCTCTGTATATCCG  
CCAAATATCTGTGAATTACTAAAACGCTAAACTAACAGATTAAGTGGACAAACCCTGAAAAATAAGTAAT  
AAAAGATAAAGATAAAAAAATAAATACTGATATACAAAGCTCCAAAAATATGTAAGAACATTTTAAACT  
TGAAATACATTATTGGAAGATTAAGTTAAGCTATTATAGACAAACAGTTGTAAGACCATTTCAAAAATAT  
ATGACACAAAAACTAAAGTATTGATGAAACTTGTCTTCCAGTTTAGCGACGGTTTTTCTGGTAAATAAAT  
GCTAGATGGGTCTTTTCTTGTCTCTCTCGTGGGACAGCGGAAAGTCTTTAGATTTACAAATCTAAAAAT  
AAGGACTTCGATTCCCTCACTAAACGAGCAGACAGCCTTATAGCTTTGCTATAAGAAAAACACACATA  
TTTCTTGAAGTCTTCCAGCTGGCATGGTTACTTCTCACACCACTTGAGATTGCATGTCTTAAATGT  
CTTTATTGCATTTTTTGGGCTTCTTCGGTTTTGTTTGCTTTCTTCAACTGTCCGTTGAAGATCTGTCTC  
GGGATTCTGGTCTTCTTCACCCGGATGGCATGACTAGTCCACTGTAAGTGGGCTTTCAGCAGCAATGATT

CAATACTAGTTGTATTGTACTTGACCTATCAAGGACTTCTTGATTGGTGATTTTATATTACAAGTAAATG  
TCCATGATCGAGTGTAGCTTTTTTCATGTGCCTACCGTAGATAATTATGTTTCACAACCAACGAACAGTGA  
AGTGTGGACTACTGCTTTGTATACTTTTAGTTTTCTGACAGTTGGGTGTTTTTTTTTTCTCTAATGCAC  
CTGATACACAATCTTCTTAAGGCTTGGTTGGCTTTCTGAATCCTAGACACATTTTCTTTTTATCCAACGT  
TATATCTGCGAAAATAATATTCATCAGGTGTATGATGTTCTCCAGGTTTTTCAGTTGAGTTTCTTTAATT  
ATGATGGCAAATTGTGGCGGAATCTCGTTTATGGCTGGTTGAGAAAGAGCTTCTGTTTTTCCCAGGCTGA  
ACGTCATCCCTAATAACTTATAAACCCCAAGAGAACTTGTCTATCCATGGTCTTCAGACGATTTTCTTGTG  
ATACACAAGGAAACGAACACCCACAAACAATGTTTTAAGGATGAGTCTTCCAGAGTTTTAGTCCGTCCA  
GAGAAGCGTCGAAGATAAAAAAGAAGACCCGTTAAACAATATTTTATGTTGACATCAAGGTTCAAGTTC  
TTAACAGCATGAAGTAGAACCTTAGTGAAGAAGAGATTGAACAGAGTAGTTACAAGCACACATCTCTTCT  
TCACTTCAATTCCCATGTTAAACACTTCTTAACATTCTCCATTGAAAAGGACTTCTCTACTTATGTTATC  
ATGAGACAAGTGGTTGAGAATGGTAGCCGATTTTTCTGAGGTTACAGAATTTCTCTGTTGACTGTGTTAA  
AAGCCTTATTAGAGTCGATAAAGACGGCGTAGAGATCCATATTCCTTTCTAACCACCTTCTCTGCACCTG  
CCTTACTGGAAGATTATATCCACAGTGCTACGACATAAACGAAATCCACATTGAGCTTCTGGTAGATTTT  
TCTCTGGGATACTTGAGACTTGAACTGAGCCTGTTCAAGATGAGGCAAGAGAACATTTTTCTGTAAATGG  
AGGGTGGCGAGACTTCTCTACAGTTGTTGCAGTTAACCTTTGAACCTTTATTTTTAAACGGTGCAATAAT  
GGTAGCTAGTTGTGAGTCAGTTAACAATTTTTCTTTTTCCCAGATACTAGTCAAAACATTGTGGACGAAC  
TCAAATGACACTGTTTTAAGTGACCTTTACAACCTTTGCAGAGATCCCATCCTTACAATGCACTATACCAT  
AGTTTGACTATTTAACAACCTTTTCTAACTTCTTCTCACTTGGACCTAAGTCGAGGTCTTACAGACTTG  
TATCTGGGGTATATTAAGTTGTCCAGAAATAAATGTTGTTTTTGAACGCGAAGTTTGGACAAATATAAA  
CCAGTGTGTGAAAACATGGTTTAATACAAGTAAGCACCATTTGTTTTAATACACTTTTGCCAATGTTTAA  
GAATTCGTGTTTATGCCCTGCTGTAGAAATCAGAGTTTCTATGGTCAATGAACCTCATAAAAGCTTCTTT  
TGCAGCTGCCTGGTTTTGAAAGCATTTATTGTTTAAAAAGTTGTCAAAGTGCTTGAAAAATAAAAAATCT  
GTTGGGGAAAAGGTATAAGAAATAAGGTGGATGAGACTTAACCTCAATTCGAATTCGTTCAATTTTTGG  
AGCGTCATCCTTGACAGTCCTCATAACGCTGGTCTTGTTGATCTTCAGTAAGTCCAGCGGAACCCACTTA  
TCTAAGTTTTGTCTTCTCCTCTCGCACTCAGGTTGTTGGCAAACTTGATTTGCTTGTGCCTAGCTTTTCT  
GCAAGCTCAGGAACGTGTTGTGCGAAGGGCTGTCTCAACTGCTTCCTTTAATGCGTTTTTATCTAAGGATG  
GTTTCTATAACCTTTGTGGTCTTCAACACTTTAATCTCCATGTCAAACCTATGGAGCCAGCACTTAACT  
GTATGCTCAGCAACAGATCGATGGCTGAATGTCTGGCTGATGTTCCCTGTAGTTTCGGTAGCTTTTTATC  
CAAGTTTGAAGTCGTAAAGGAAAAATCAGACGAAAAGTTCTTCTTGTCCATGCTGTCTTAGGGGTTGTGAA  
ACTTACTCCGAGTAGAGTTGAAAGAGCAGACAATTAAGACACCTTGGAATGACAAACGTTGGATTAAAC  
CAACCAACGATAAGTTACTCAATATTCAGCTTCTAAATTTACAGTGATAATTCAGACACTTATCTATGA  
ACAACCTATTACAATACAGTGAAGTTTGATAAACAGTGAACGGTCAGTTGAGGGGTTAGCTGGAGTGCTC  
TTTCCATCATGCATTTATGCTATCTTTGTCTTGGTGATTCTGGTGTTGTCTAGAGCAGTTTCTAATTTT  
AGAGAATAATAAATGGTCTTTATAGGAAAAATACAAACGTATTAATAATGTTTGTATCTGCATAAACTTA  
ACTCCATCTGCTTTCTTCTTCCACTGCCAATCCTACATCATGCAAAGGTTTCGTATAGTTTGGTGATGA  
GAGCGTCTCTAATGGTTTGTGACGAGTAAATGACGTAATCTGTGAGGTTTCATTGTTTTGGTCTTGGAT  
GCATTACCTTGTCTTATATTTATTGACTTGTCTGAATATGGTGTGGTTTTTATAAAGAGACAGTGCAA  
GACACATTTGCTCACGAAAATCAAGTCGTTGCTGTTTCAATTTACCACACTCGTATTTCTCTATCACTCCTT  
TCCACTAAATACAATCCTTGCCGACTCAAGCATTAAAGTTGCCCATCAAGATGAACCTGTTAACTGCAAA  
GGTTCTGATAACAGAGTGCAAGTTTGCTTAGACTTGTTCTTCGATCTCCTCTGTATTATTGATAGCTAGA  
TCATAAGTGCTGACAATTGTTCCCTTGGCGCTTATGGTTTAGGGTGAGGAGGAGCTTAATGAATTTTCAG  
TAGTTACGCCATCTTTAGTTTCAATGACCCAGGAACCTTATTTTATAAAGCGCTTCTAGGTCAACGT  
TGTTAGTGTGCTAACTCTCATCAAGTAAGGACTGTGGAGTCCCGTTATATTGTTTCTGTCTATGGAAGTTC  
AAGCGTTCAATGCTCCTAAAAGATTTTCGTGTATTTTTTCCACTTCCAATGTTTTCATTCGACTGCATAA  
GGAATAATTTTCCAGCCACGGTGAACCTGGGAAAAACAATGTTTGGTGCACTTTTTCCAACATCTTCTTAC  
AACGGTAAATAGTGCTGTTCTGAATAAGGCTGATCCAGTTGCCACGAAAGATACTGAACCTTCTACTGC  
TCTGGGTACAGAGAAGAATGAGCATTTGTCTATAACTGTGAGTGGTCAACACCATCTGTGCGCTTGTCA  
CTCACCCAATACCGCAAGCTTCATAAAGTAACATAAGAAATGCAGGTGAATTGAACAATTAACATGTGCCT

GGGAGATTTTACAATGGGAAAATCGTTTCGTTGCGTTGAGACAGTCCCACCTCTTTTGGCCAAGGAGTCAA  
ATCCCAGTAGCATAGAGAATCATTACAACCTGAGGGCTTTGTTGGTTGTAGTAAACGGCCATGACTTATAT  
CGTGCTTTGTAAAATCCCTACACACTCGACAACGCCTTGCTGGTACACCTTCATGATCGTTAGATCCACT  
GTTGATCTCATCAGTCTTCACAAGCTATGGGTGTACATATCCTTACGGTGAATAAATGTTTCACGGCTTA  
ATATATTATTTTACAATTTTAGAAATTAAATAAAATGGGATACTTAGTCACAAAAGATGTAACCTATTTG  
AAAAAATTACTTTCGGGTATCACTTCTATCTAGGAGTATTTTAATTTATTATATATATGATGTATCATG  
AAATTGTGTTGACGGATGTATTAATTCAAAAAATACTTCATGATCACCATTGTGTGGATGAAACAACAAC  
GTACTTTAATAATATGTTTTATCTTCACAACCTAAAACCAATCCTTATTTCTCAACTTCTAAGATCAACTT  
CAAGCCGTTGAAAATTGTTTCACATTAATTATTAACCAATTTTTTTGAGATGGGACGCTTTATTATATATA  
TGTATAAAATTAGCTTGGTATGTAATTATTAGCCAGTAATGCACGAACGTACAACCTAGAAAAGCATACAA  
GCAAAATTCTTATGAAATAATGTCATTACTTAAGTTGGGTGGACCGAACAAGAAAAAGAAGGAATCTCCA  
GTAAATTCTCGTAGTGGAAGCACAGGATAATACATGAAACGGAGCTGAAACAGTGATAAGAAATGATTAT  
GGTTCAGGTAGCAGATAAAACGCTATTTGTTGTCTTTGGATTGATTCAAGTGAAAAGCAGATAACTTGA  
GACCGACTGTCATTAATAGAATGTTGAATTGTATGGTGTGTTATATTGTTAAAGCACTATTTTGTATGAA  
GCTCCACCAGTATCTTGTATATTGTACGATATCTTAACATTTGTAAGCAATGATCACGTGATTTTGTAG  
AAATAAATGTTCTTATCATTTGTTAGTTCCTCTTCGGATGACGTATGTCCATTTTCATTAGCTACCTGA  
TTTAGATTGTGAAGTTTTCCGTAATATTTTTCAGTTGATTATGTTATTCATAAATTTCTATTGATTTACAA  
TAACAACCTTCTTTTGAAAAGGAAGTTTTTTGTAATTTAACTTTCTAATGCCATTTAGCTGTTCAATTCC  
ACAAATCTATTTAAAAAGAAAAATAATTTTCTATTTATAATTTCACTTATCCTTTCTTTCTGTGATAAGT  
GTAAGCCACATATTTTATAGAAGAGCTGGAACCTTACAAAAAATCAATGTTTAGTAAAACCAACAAAAACC  
ACAACAAGCTCTCGTGTCTTAACTTTAACACTGGAATTGCTTAATCTGTTTAAAGTTATAGTAAAGAGCA  
GTTATTTTATCTAGTTTTTGTGTGACAGATCCTCTGTGCGGAATTCGACAACTTTTTCAGACGTATCGAATAA  
ATAAATACAACTACTGCTATATGTTACGTTTTGTAAATTTAAATAACCTGAAATCGAAATTTGAATTTA  
GAAGTAAATGAATGTGAATATGTATTAATTTACATTTGTCAACAAGATTGAAACACAAAATTTGTCTTT  
CTTGACGTAAATATATTTTAATATACAGAGAACCATAACAATTCATAACAACCTGTTAATACAAATAATAAC  
TTATATACAAATATTTTACGAACACACAAACAACACTCAGTTTTCTATCTGGTCTAAAAATAAATATGTT  
ACTGATGGACAAGGTCCACGATGAGCGAATTAATTCTGAGCTGATATTGTTACACTTTTCTTGACGGGAA  
GGCTAGCTAGCTAAACTCTTGGCTGGTCTCATGCAGTTTATAAATTCACTTTTACCGAGGAAGATGTGTA  
ATGTCCTCGTAGGAGCAGCATTAAAGTCTGAAGTTGAATGGTATGTAATGTTGAAATATATAAAGTGCC  
TGGTCTGAATATCTGTAATTTTTTTTTTATTAATAAGCGTTTTGTCACAATTAAAGCTTTTCGAGGCTTATAATA  
TACTGAATATAGTTGACCAACAATATTCTTAAAAAAGATCTCTTAGTGCTTTGATTTATAAACTTTATGG  
CGAAGTTCCAGAAAATTGGCAGCAATACTGGCACCCACTATAATTTTATATACACACATTGTACATAGTT  
GATTCCTTACACTCGAGAATCTTCTACAAATGTAGAAAACAGGTGGGGCTCACGAAATACATTTCTTCTTG  
TTGTTGTTGTTTGAATTAAGCACAAAGCTGCACAATGGGCTATCTGTGCTCTGCCACCACGGGTATCA  
AAACCCGGATTTTAGCGTGTAAGTCCGAGACATACCGCTGAGCCACTGGGGGGCGAAATACATTTCTAA  
ATTTATATTAAAGTGAAACAAACACAAATATTAAATATGTTACATGTACCATTTTAATTTGTGATTTTAA  
TCGTAATAAAATGTTGACTACTTAATTAAAAACTGAACTTTTAAAGTTGTTTTGTTTGAACAAATATTAT  
TTGCCCGTGTACTTATGCTAGAGTGTGATGCACGGGTGTGCTGAGGCTACAGTTTTGTTTAAATGTGTAC  
TCATGTTACAGTGTGATATTAATGCAATGATGCTTCAAGGTGGTTTACACGTGCATACCTCGTGATGCAC  
TTGTCAACAAGTGATATGCGTCTTAAATGTATTTTACTCACGCAAGAAATGTACAATGCAATTTGCACGT  
GGACTGCTATTACACTATAAATTTGGTTGAAATAATAAATGTTATGTTAAAACATGCAAATACCAATTTT  
AACAGAAAAGGCGAGTGTGTTGTGGAATAAATAAAGTAACTGAAATCAGTTGAAATTTATTTAAATGA  
ATAAACTTAAACGCCGTACCTTTGGAACCTTTTGAAGGCTCAACGACAAATCTGATATGTACCGCGAACC  
GTAATTTAAAGAACGAAAATATAAATTTTTCCGTATGTTACTGTTTCAAGCACTCTTAGCATGACTAAAAT  
GACCAAGAAATACTTTTTCACGGTGGGTGATACAAGTAGCTCAGAGCTTTGGCTCTGAATGAAACCAAGG  
TGCAACAGAATCATGAAATAACTAACTTAACTTTTTCTGTCACTGGGAACGGGTACTTTTTCTGTGCTGC  
AAATAAAATAGTAAAAAAGACACATAGAGAACCCTATTACTAGTTTCTGAAGTCTTGAATGAAGAT  
GATTTGATACGAAAAACAAACCTGAAAATAAAACAGAACTCGTGCATATCAGAGACATTGAACTCATAT  
TGGAGATGGACTGAAATAAGTCATCACTGGAGTATACCCACTCCAACTATGTTGTAGTTTCGTAATCCCA

ATAACGTATAAAATTGGAATAGAAGATTTATGTTTGTCTTAACTCTTTGTACTGCCACCCATGCAAAAT  
ACGTAGTCTGTAATGCTATATAAGTATCTGGTGAAGAGACACTTAGATGTAAATCAATATTATCTATTTT  
ATTATACACCGTATTTTATTATATGTTAAAACCATTCAAATAACCAAACCTTCTCTTCTCTCACCAACAG  
AAGATAAAAAGTCTGATTCTGGTTATTCTACATATTTCTATTTTAAACATTTTTTAAAAATTCGTTTCAA  
ATCATCATATTTTAATTTAATCACTCGTGGTGACCTCAAAGAAAAAACTAAACAGAAAATCAAAGTGTTT  
AAAGTAGTATTGCGATAAACTTACTACAAAAAAATCGTTTCTCAGAATATCGATAATTTGTCATAAGGGA  
ACATCTACTAATATCTCAGGCTCTGTTCAACTACTGTTTCTATTGAAATCTTGTA AAAATTTACGAAACT  
TTTCATTTTTTATGTAGTTTTCTTAATACAGCTGGCTTTTATAAGTGGTCTAAACATGGTTAACAAAAAA  
AAACATAATGGCATGTGGACGACCATTCCAAGGCTGAAGTTTTATGGAATATTTTATTAAAAACGGCAAG  
CACGCTCACATAGAACAACAAGGTTTAATTTAAGTTGATATGGCTGTTGTAATACTTGTGTTAAGTTTTGT  
GTGGCTGCTGAGATACTTAATTTGAAGCATGTGTGGCTGTTAAAATACGTAATTTAAAGTTTTTGTGACT  
GCTAAAGTACTTAATTTGAAACCTGTGTGGCTTCTGTACTGCTTATCTAAATGTTAGATGGTGACTAAAA  
ACATAAATTAAGATTTGTTTATGTGTGTGGGCACTGTAAGGTAATGATCGGTCTGCTTAATATTTCTCAC  
AATGTTCTATAATGTCATGTTTTCCAAACTGCCACTGAGTTGTTGGTAATTCACTTTTAATTTGTTCTTG  
CTCTTAGCTAATTTAAGTGCATTTAATCTTATTTCTGTAATCGATATATAATTGATAAAGCGTAACGTAG  
GATTTCCCTTAGGCCTAGCTTCTGTCTTTGCTTTAATGATGGTACTTGCTAGGTCTATTCTACTCCTTAG  
TTATTTTTGTCAAATCACCACATCCTTTAAAGAATGTATTCCGATACATACCACTTTACAACTTTGTTAT  
TTTGTGTGTGGTAACTGGAATCAGTTAAAAACCATTTCAAAGTGTTTCAGACAAACAAGTAGTTGGAAGC  
TTTGA AAAGTACAAA GAACCAGTTTTTGAATATATTTGTATATTTAATTTATCAAAAAATAATCAATAAGG  
CAAAGTCGATCTTAATATGATTATCTACTTTATACAGTGTTCAAGTGTGATGAGATCTATTTATATGCAA  
AAACGGCTCGTATGGGTTGAGAAAAATATTTTACATTGAAGAGCGAACAACGTTTCGACCTTCTTCGGTCA  
TCGT CAGGTTCACAAAGAACCACTCGCTACCCTATCCCATGTGTAAGTTGATATTTCTCCACCAACAGAA  
TGTAAGAGGCGGAGCACAGATGACGTAATAGCCACTCCCTCCACTGTGAAAAATAACAGCAGACTTACG  
AAAATGCATGAACGTGGCGTTAGATGTTCTCACGCACCTGATAAAAAAAATCACGAATTATGAGCCATTC  
TTATATTCACATACTCAAAGCATACTAACTGATCAATTTAATTAGTAATGATTAGGCTTATCTGTAACAA  
CTGGCTCCAGTTTAAGATCTTATGGTAGCAGTTACGGTAAGGTTGGTTGTGAAGATTGGTTATCCATTGT  
TGTCATAGTTAATACTCTACACAATATCTTCAATCTAATTACCAACTACTCACCTTTCCTTTAGTACTGG  
TATTATTATATACTAACTACCAGTTTTCAAATATCCTGCATTTTCGGCTACTAATCTGATGTGTCTTTAAG  
GTCATGGGAAGAACTGTTTTTCGTTAGGACCCCTTGAATACAGCACTGGATTATCAACCAAAACGTTAGT  
TGTAAGCTAACTGGTACTTGACATTTGATAACAGTCAAGATAAGATATAAAGATAACATAAAAAAGTAAAT  
AAGTGATTAGGCGTACTCAATCATATGGGCAATGACAATGACTCTTTAATAGTGCCATCTAGTAGTTGTG  
TTTTAAATTTCTTAAATTAATATAATTTTTTAGGCGTTTTATAACTTTCTCCAAGATGTAAATACACAA  
TATAAGCTCGAAAAGTCATATTATAATTTAATATACTCTATCAGTATATTGTTTTCATACATTTTAAAA  
TATAAAAATTATT CAGTCTTATTTGATTTGAAACATGGATTCAAATTAGGGCCAGGATAAAACTTATTCT  
GACAAGGTTTTTTTATTAGCGTATTACTATTTAATATTTATCACCTAGATGTGTTTGTATATTTTGTTA  
TAGAACACTTTGAACTGATATCTCTGATAATAAGGTAGTTGTTGTTGTTTGAATTAAGAACAAAACTAC  
ACAATGGGTTATCTGTGCTCTGCCCTCCACCACGGGTATCGTAGCCCGGTTTTTAGCATTTGTAAATCCGC  
AGACATAACGCTAAGCCGCTGGAGGGTCTCTGATAATGAAAAACCGTTAAGACGAAACACGTGTTAATA  
AGTTTTAATGATTC AACCTGTATAGCACCATTTTCTTTTTATGTATTTTATTAGCTGTGTCTTAACTATT  
TTCGTTTTAAAAGACCTTGTTTTTTTACAAACGGATGGTGTA ACTGATCTAATACAAATAAGAAATAATTAAT  
AGTGGTGCCGAAGACTTCTGTTATTCTAACACCATGCTAGAATGTATTGGTCATTTCAAGAAGTTTAAGA  
TTTGAAAAATACGATGCGTTAACATTTGAGATCAAATTTATATATGTGTGACTACTGCATGTGAAAGCGTA  
AGCTTCTCTTAGAAA CTGTTGTTGGTTGTGGAATTTTCGCTTAAAGTTATATGCGTTAGCCGTTTCTAATC  
AGTAATTTTTAAAATTATAAACTAGAGAGAAAGCAGTAATCAACATCACCTGCCATCTACTTG TAGGCTAT  
TCTAATCGAATAGTTGGATTTAACCGTCACTCTTATAACGCATCCACTGCTCCATAATACGGAGTGGCAA  
CAGGACGCGAACTAGGGAGCTTCTGATT CACAATTTGGCACGGTAATCAACGAGTGCAATAGGTCCCTTCA  
GTATAAATACATGAAATATATGAGTTTCATGGAGATTTTTATTACGTACATAAAATATACGGATTT CACG  
GATAATTGTTTTTTAAGTTCATGATAATATTGCCTTTTCCAGTTCGTTCATTTTACTTACTCAGTATA  
CTGCGAGAACATACAGAACTAATGATATATATTGCAAAATCGTTGACAAGTGAGGTAGGTGATTAAAAGA

AATGGATAATTTAGAAAAGAAGAGTGTGTTTGTGTTTTGAATTTTCGCGCAAAACTACACGAGGTTTATCGGTA  
CTAGCTGTTCCCTTATTTAACAGTGAAAGACCAGAGATAAGGTAGCTAGTTATCAACACCCATCATCAACC  
CTTGAAGTACTCTTTTAAAAATGAATAGTGGGATTGATTATTACTTTATAATGCCTCCATATCTAAAAGG  
GCAAGCGTGTTTTGTGGGCCGGGGATTTCGATCCACGACCTTCAAGTTGCTAGTCGAGCTTCTTAACCAC  
TTGGTCATGTCTGAAAAAAAAAAAAAGCTCTTTACATTGTGATGAATAATTCTGCCAACTCGAGTCCAGTT  
TCACAAAACAATATGTGTTGAATTTCCCCCACCAGTGGCTTTAGCTTTATTCATTGCTGAACGAAAAAAAA  
TTAACAATATAGGGATTGAGTGTCTTAGTTGCTTTAAATAGAAGTCCAAAATCACAGTCAAGATCAAAT  
CAAAATTAAGGCACTGAAAACAAAGTACGAAATATGACTTGGGCTATATACATTTTTTGTATGAAGAAA  
AGTTTTTCGGATGGTCCAGAGTCAACCAGCATGTCTAAAACTAAAACAAACAAGCAAAAGGTTTCACTGT  
AAATATCGAGAAGATTGTAATCCTTGGTAACCAAAACAAGGAAAAATAATTAATTTTGAAGTCAATTTTT  
AGATAGTTTTTAGGACATTTTTAAATGTTTTCTGTTTTGTTATGCAGTTTAACCAATGTGTGAGTTCTTGTT  
TTACTTTGCATTTTTTAGCTTGTAGCTATAAATTATAATTCCTTTGTGTTAGTTATTTTTGGATTTTAGGT  
TTGGAAATATTACATGTTGCTGAGTCGGAAATAAAATAACTAACATTTTAGTAAAATACAATACTTTTTTC  
TGAAGCTCGAAACGTAAAACTGTAAACCAACTAATTTCAAGTGTATTTTATTTTGGTTTATGTTTTGAAA  
GTACATGTTGACAGTTTTTAGAACATTTCTAGTTGGTGAAACCAACACTATTTTAGTGTTATACATCTAC  
GTAAAGGTGTAAAAGCGACGAAATATTAATACTTTTTGATGTATACAAGTTTAAATTATGACACAAAAAT  
GTAAAACAATGTGAGTTTGGTGTACCTGGAAAGTTTTGTATCTAAGGGGCCCATCATGGCCTGGTGGTTA  
AAGCACTCCACTCGTAAGTTGAAGGTGCTAGGTTAGAATCCCGTCGCATTAACATGTTTCGCTCTTTCA  
GCCGTGGTGGTGTATAAAAATGACGGTCAATTCCATTATTTCGAGGTAGAAGAGTAGCCCAAGAAATGGT  
GGTGGTGGTGGTGATGACTAGCTGTTTTTCCACTAGTCTTACACTGCTAAATTAGGGAAGGCTAGCGTA  
GATAGCCCTCGTGTAGCTTTTGCCCGAAATTCAAAAATAAAACAAACAAACAGTATCTAAAACAACGTAAGT  
AATAAAACAAGCTCATGTGTTTGTATTATATTACAGTTTACAAACGAGTCTTTTCTAAAATATGTATGTGT  
TGTTTTTATATTTCTGTTTATAAAGGTGTTTATGCTAATCTATTAATTTGTATTTTTATTACGTTCTTTTT  
CAGCATCGTATTGAAAAATGTTTAAATTTTGTATTGAAAACGCTTTTATAAGAATAATATTATTTCTCT  
CTAAAAATAAAACAAGCATGCTTTTTAGCATTTTTGAAGACAAATTATTTCTTCTTTTTTTCATACTAGA  
CAAACCTAAAAATAAAAAGCTAGAATTTATCCGAATCGAGTGCCTATATGATCTCAGGCACATAAATCTGGG  
GAAGCCAGTAAAAGCATCAAAAACACATCGTTAGGGTTAATACTACTTTTTTGACCTTTGTAGTCAGTG  
TCTCTTTTTTCAACGTCTAAGAACGTTAGTCTAAAGAGAAACATACTTTGAATGGACGATAGTGACACTG  
ATCCTTAAGAAGCTGTTTGTGGCACCTTGCCCTCGCCTTTGTTTCGATTCTTCATCTGACAAGAGAGACAA  
CAGAGAGAAAAATCTAAAGATAAAAAGCTTTTTCCGTGAAAATCACTGGAACAAAGTGTTTCCCATGTTTT  
CTCAGCTTTCTTTGACTGTTATAAAGACATGAAGTAGAAAAAAGAGAATGCGAGTGGAAAAAGATGCAT  
GAGTTACAAACACCAAAAGTTATACTGACTTTAAGATCCTTGAACATACTGAAAAAGACGTTACAGATTT  
CATTTGAAAATTTCTGTTAGTACACATAATAAGCGAACACAGAGTAAAAATTAAAGTGACATTATGA  
AATTGGAGCTAAAGTTACATCAACTTAATCGGATTGATATTTTGACTGTGTGAGCCATGCACAAATTTTA  
GCTTTGGAAAAATGTCAAATCATAGCGATTTCTTTACAGCCCATCTCATAAACATGAAAAATTACGTAC  
CTTAGAAATTAAGAAATGCATTAATCATAAAGCAAGTTTTGTTGCATAGTTTTAGCTACCCGTGCATCTTT  
TGTAAGTTTCTGTTAAATGTAGTTTCTGGTTACTTCATACACTTTGTTTTTGGTTGGTTTTTCTTTTTTTA  
TTTTTGCGCAAAGCTATTCAAAGGCTATCTCCAATATCTATCCAAAATTTAGTAGTGAAGGACTAAAGGGA  
AGGCAGCTAGTTATCACAGCCACAACCAACTCATTGGCTACTGACGTTTTGTGGGATTGATCATCAGGTG  
AGAACGTAACCACGTCTTAAAGGACGAGCGTGTTTGGTGAGACAGGGATTGCAACCTATGATCTGCAAGT  
TGCGAATCGAGCGCCTTAACCACCTCGCCATGTTTAGTGATTAGATAATACTGATTTATTTATTTATCTC  
TAAATGATCAAGTCTTAGGAACAAATATGTGAAGGTGTTATTCTTTTGTGTCAATTTCTGTATTGTATAA  
TTTGCGATATTTGATTCACACGTATCCTTCTAAACATTTATTTACTGAACTCATTGATAAATGTTTGAA  
GCGAAAAGCGTAATTTCTATATATTCTTAATATTTACATCCACGTGAGCAGCAGTAAGTCTGAAAGCTTA  
TAACTCTAAAAATCTGATAGCGATAATTGTGATAAGAAAATCACAGATAGCGTAATATTCAGTTTTGTGC  
TTAACTGCAAACAATTGAAACTCCTTTCATAGTTACGTAATACAGAGTAATATTTATCTAAATGTGTTTT  
TTTCATAGCAAAGCCACATCAGGCTATCTGCTGTGTCTACACAGGGCAATCGAACTCATGATCTTAGCGT  
TGTATATCGATAGACTTACCGCTGTTCCAACCTGGGGAGATTTATCTAAAGTTGGTAGTGTTATTTCAATT  
AAGATGGGTGTAAGTTTTTGGTAGATGGCTGAAACTTTGTCTTGACTTAGGTACATAGGATGGTTTATTT

TAGAACTATAATAAAATTATTAATTTAATAAGAAAGAATAGAGACTATCAAAACCATGTAGGGGAAAAGT  
ACAACAATGAACTCGAGAAATGATGAGTTTCCAACGTGGCAGTTTCCAATTAAGGCGCTATAAGTTGCAC  
AAGTTATTTTTCAATTAATATTCATCAGTAAAACTCCGTATTTTTTTCAGTGATGGATACTGAAGGACTTA  
GAGAAAATATTCAATTTGAGAAAACGAAGGTGTTTGAATTAACTTTAAACTATTCTTTGACATACTCAA  
TACGACATTCAGTCTATTGTTCTGGTTTCAGTAAATATTTGTAGTCGTTTTTCTGTAGCGGCTTATA  
AACTATGATCAACAACAATAATGTTGGAGACATTATTATAAATATACGCATTTACTCTAATAAAACTAA  
ACATTTAAACTAGTATAATGGGTCTTAAATGGTTTCGAAGAGCTTATATTAGTAGAGAAGAAGAACTTG  
GGAAATTTTAAAGGTGGAAATCTCGACTTTCAAGAATCACCACGACTTTTGCAGGAGTTTGTTTAGTAG  
CTGTGCATAGATTTTGGTGCAGTATATCTAGCCATTTTTCCAGTAGAATTCAATGCTTTAAACACTTTGG  
AAAAGAACTTGGCCGCGAGCGATAGAAAAAACTAATAAAATCTCTTTTTCTCCTTCAAGAACCAACATA  
AGAGTAGTTCTACGACCTACACAGGCTTTATTTTATAGTAGTTTTGTGCGAAATTTGAATAAACATTCATA  
GCAGTTTTTTAGGTAGACTTGTGAAACAATAATAGTTAATAATATTGAAATCGAACGAATGAATTTTGTCT  
TAAAAAACTGACTTTTATTTTTTTTTGTCAGTTATCAATATTTTTGTAGCCTTATCTATTTGAAAGAGAAA  
TTTTTGAGTGTTGTTTAAAGAAGAAGCGTATTTTGAAGATATTTTTGCTTTTATGTTATATTAGAATTTT  
TGTGAAATCCATTTTCATAATTAGTGACTAATATATCATAATTGACGTTTCACCTTACTCCTTCATCAGG  
TCTTATAGATTATATTAAATACACAATTCGAACGCCACTGAAAACACAAGTTTTAATATGTTACGATAT  
TGTATATATATTTCTTAATATGAGATAATTAATTTTTTGGAGTAATTTCTTTATTTGTCAAAAGTAATGT  
GCAACTTAGTAATAAAGAATGCATTATATACAATTTCTAGAGGTTGGCAGTGACATGATAGTTCTAGTC  
GGAGTGATCCTGGCGTAAGTGGTGACGAAGAAAACGAGGCGAGACTGCGGTTAAAAAGAAAATTACAGAG  
AAATCGAACTTCATTCACTCCAGAGCAGATTGAAGCTTTAGAAAAAGGTAACAATTTAAACGAACGGAT  
ATGACGAATTCAGATATTTCTGCTTAGGTTATTAGATGTTAGGCCTATTACAGATGTTTGACGCTTCTCT  
TCCAAGAGTCTTAGGCCTATATAAGTTGTAAATAACGAGAACATTCACCTAGGATACCTGATACTTCAAT  
ATTTAAGGCATTCTGCTTTGCCAGTGTCACAGAATATAAGGTAGAATATTTACAATAATTATTAACTTTT  
ATTAGTTAAATATGAAGTAAACAGCTTGAAATGAGTAAATTAATTTTTATTAAAACTACATCCTTTCAAC  
CACACATGTAATTATCCTTAGGTTGAACTGGTCTTTCTTATCATTGCGTAAAAATAACAGCATAAAGTC  
CAATACACTGAATGGTAGCAAATAAGTTTCATTATTTTTTACCACAATGTTTTCGATTAACTTAACG  
CTTATTGATAGGTTTAGATTCACTGTAGATGCTCACACAACAATATCACTTACTAATTTTTCTTGATCT  
CTAACACCGTAAAAAGCAAACTCAATTTTCATGAAACAGACCTAACAGAAATACCTGTCAAAATAATTTAG  
ACTAGTGATTGTACTAGAGGCTAGGATACAGGTAATAAATTATTTAATATTTCTATAATCAGAGATGGCA  
TAAGATTTTTTTCTCAAGAGAAAATTATGTATAGTTGTATGTGATATAAAGTATTTTAACACTACATTCCT  
TACTCAGAATGTTTGTATTGTAAAGATGTTCTTATAACTGGTATCCAATTGTACGTTAAAAATTACATTT  
CAAAACACAATAATCGGTTATATGGTAGTCACAAATATATTTATGAATATTTTGCCACAGAGTTTGAAA  
GAACTCATTATCCAGACGTATTTGCCCCGGAACGGTTGGCAGCCAAAATAGACTTACCAGAGGCTAGAAT  
ACAGGTAATAAAATTATTAATATTTATATAATTAGAGAGATATAAGATGTTTTCTTTTTCAAAAATAGTT  
ATAAGTAATTTAAATATTATGTAAGGTGTTTCTCTAAAAATAAATATTGTCACATAATTCGTAATTTCTC  
AAACGATTATATGCAAAACAACAAAGAATAAATAATAGAAGAGTTTACTATGAGAACCTCTAGAAG  
TTTATCTAACTAAAAGCCTCTGAGGTTTACATAATACCTTAAGAGAGCTCTCTGCTAATACACTTACTTT  
TAATCATTCATGTGAATATTGTGTCATTAAAGTTCAATTTAACTAAGCTGTTAAACCTAGAATAACAAC  
ATTTAATAACGTAAAGGTAAGATTTACCTTATAATTCTATGTATTAATAGAGGCATAGAATTCATTAAAT  
TAAAATCTGTAGTTGTTATTTGTATTTTTTGAATTTATGGTAATGCTAATAAAAGTATTTGCTGCCCTCCT  
TAATTTGATACTGGATAGAGGGATGGTTGGCAGTTAGTATCAATCATCGCCCATGCTAAGTAATTGAGTG  
TCAGTCCCATAAATGCATCGTCAGCTGAAAATGCGAAGATATTTTGTGATATCACAAGGATTTGAAACCTT  
TAGGCCAGCTTTGAAATCCAGAGTTCTATCACAAGGCCAATTCGTGCCCATTTGTAATCACAAACACTAT  
TACATGACAGTCGTTACCTAACAAATTGAAAATTAATAACACATCCTCTAGCTCTTACTGCAGAATCACC  
ATTGGTAGTAGGATATTTAAAAATAATAAAGTGTCAGATAATATAACTATTGAGGAGCTTTCCGACATTT  
TATCTTTTTTAATGGGACTATAATTTATCTCCTTACATTATTCTCCTATTGATCACGTGCTCACCAGTAAC  
CGTAACATTGTAACTAACGAAACTTTGCGATTATTAATGAGCGGAAGTGGTAGATTCTGTGAGTGCTTTA  
GAATTATTTTAGTAAAGCTTTGTTGTTTTCGAATTAAGCACAAAGCTACACAATGGGCTGTCTGTGCTCTGC  
CCACCACGGGTATCGAAACCCGATTTTAGCGTGTAAGTCCGCAGACATACCGCTGAGCCACTGGGGGGG

GGCAAATTATTTAGTAAAGCTTTGTTGTTTTCGAATTAAGCACAAAGCTACACAATGGGCTATCTGTGCTC  
TGCCACCACGGGTATCGAAACCCGGATTTTAGGGTGTAAAGTCCGCAGACATACCGCTGAGCCACTGGGG  
GGGCAAATTATTTAGTAAAGCTTTGTTGTTTTCGAATTAAGCACAAAGCTACACAATGGGCTATCTGTGCT  
CTGCCACCACGGATATCGAAACCCGAATTTTAGCGTGTAAAGTCCGCAGACTTACCGCTGAGCCACTGGG  
GGGCAAATTATTTAGTAAAGCACTAAGTGATTATAAAAATTGCTCTGTTAAGTATCAAATAAATGTAGTAA  
GAAAAGTTTAAAGTACCCCTATTTAGAAAATGGGTAAATTAGACCTAATTTATAGACATAAAATCTCTTT  
GAACAACAATGAACGTGTTAAGAATCAAAAAGAAGTTACTGAGTTTTTAGATTATTTAAAAAATTCACATG  
TCATCAATCTCACCGATAAAGCAGAGAAAATATATTTACATTTTAAAAAAGTATTACGACTTTATGTAA  
AGTTATGACTTATGGCTGAGCAACCAAAGACCAAACGTAAAATTTTGAGCAACGAGTTTTAAAAACATC  
TTACAGTTTGAACAAACTTTTGTATCTTACAAAATGAAACATAGATTATAATGGATTTCAAACTATTCA  
ACACTAAAGATATAGAATCTTGAGATTGGCCACTCTAATATTTATAGAAAAGTAAAAATAAGAATCTAAA  
AAGGTAACTTTTAAAGAAATTGCAACCAAGCATAACAGAAATGGCTAAAAATTGCAAAAAACAATACAAA  
GATGGCCCCAAAAATGCAATTAAATATACAAGAAGCCCTTGAGGGCTGGAAATTAAAGACTGCCTGACGTC  
CGGAGGTATGTAAATGTTACCTGTGGGCAACAATCCTTGTTATGTCTATTTCCCGAGCGGGCAAGTGATA  
TTTTATGTATAAAATAATTGTTTTATTGGTTATTTTTAAAGGATTTTGCTGATGATAAGCGATATAAGCC  
TGTAATGAAACTAAAAGTCGGGCAACAAGCTGTGATGTCTTTCATTAGACACTCCTCCCTGCCGAACC  
GACGATATATGTTGTAGCATGTAGATTACGAGGTCCGTGTGTAATCTAAGTTGAACAGCCTTGTTCATC  
ATTGTTTCATTGTTTCAGTAGTTTACGTGTGCCGATGATATCACCTTCGGGTTCATGGGGTTTCAGGGCCAGA  
GAGTTTTGTGAATAGACACCCACCCCTCCCTCCGATATCTGGCTGTCTCCATGTAAGTTACTTTAGCCCCA  
TAAGTCCGTGCGTCCAATAAACCGGAACAGCCGTTGTTGTCTGCAATTAATGTGTGGTTTTAACAAAGAAT  
ATGGCTTTTTTAAAAATATTTCAAAAAGCGAAGGAAATCTGATGATGAGAGCTAAGAATTGAATGCAGAAA  
GTGATATTTAAAGACAACTGTTGTACAAAGTGAAAGGAACTCTGTGGTGAAGCTGTCAGGACTGAGAAGT  
TAATTAATAGCAGGCACCACCGTGAGTGTGAGTAGTCAGTGTGGGGCCATTTCTACCGTCTAGGCAGCAA  
GACCAAGCAGTCAGCGGGGACATCCAGTTTCTTCAGCGGAAAGCAATAAAAAGTATGGCTTGGAGAAGCG  
ATCTCAGAGTTACCTGCCAAAATGGGAAAAATAATTCCCTTGATTTGAGTTTAATCAAGAACTAATGAA  
ATGTTTTTGGAAAGTACGCAAAAGCCACAAAACGTGTGTTCAAATTGCCAATGCTAAAGCTAAGTCGCAG  
GTTTCAGCCGATGGATCTATGCGTGAGAAATTTACATGCTTATCAGCTTGAGAACTGGAAAAACTTTTCA  
CTACCGCTATTACTTAGTAGTAACTGAACAGCCATTTTGGGCTTTTATGTGAGTTATAGAAAAATAATG  
AAGTGCAGCTAGGAGACACGTACATAAATGACAAATCAGCGAAGAAGCTTTATCACATGTATTAAATGACAT  
CATGACGCAAGATCTGTGTGCAGACCTTAACAATGCTGCAGTGTTTTTCTTCATTTGAGATAGATCTGCA  
GACACTGCAGGCGGCCATGGTGCTCGATCCAAGAGACTAGCCTTCAAATGAAGTTCAAGTAGCTCTTGTT  
GTGTTTTGGGGAGGATCAAATTAACACTGTGGCAGCTCATTCTGAACAACCTCTTCAGGTTATAGGCTATG  
ATAATGCTGCAGCATTGCGTGAGTGGTATAACCTAAAGACGTTCTTTTCAGAGGCAAAACAATGTTTCGAGG  
CATGAACCTTTCCCACTTCTGGAATTGGATTTTTCTTCAATTTTCCGACAGATTCCCAAATTTGTGCTT  
TTGGCACAAATCATTTCTCACACTGCTAATGAACACAGCATGTTGTAAAAGGGGATTTTAAATGTGAAGAAA  
ATCAGTCATGACCAGAGAGCCAGTCTAGATCCAGTCACGCTATCCATGCTTATGAGGATAGCAATGGATG  
GTCCAACATTAAGTGAAGTTGACTCCAGGAGAGTAATGGAGTACTGGTGAAGTCAATCTCGTCGTACCAG  
AAGGCCATAAATACCTTGATGACTAAGTCTAGTCTACCTACTACTTACCAGAGTAAGTGTTCACAGGTGTT  
ACTCAGTACTTGTCCACATTTAGACTACTTCTAGTCTATCAGGCTAATTAATATGCTTAAGTGAAGTCTTA  
CCTGATGATGAAGATGCTTATAATCATTGTATGTAGAGCAACTACAAACAAGTGAAGTTCAGTGTTTT  
TATTGAGTATTATATTTTGAAGTGTTTAGTTTTACAGATATTAAAATGTTTATTATGTTATATTTGTGTT  
TTATTATTGAAGTCAGTTAATGAAATGGTATCTGTCTGTTGTGTCAGTCAATTGCAGTTTTTTATTTGGGAGA  
GTGACCCCTAAGTGCGGGCAAATGTTTTACAAAGGTTACCCTCAGGCCAAGTGGTCAAATGTTAGTGTC  
AAGCCCTGAAGGAGAGATTGTAAATTGTAACCAAATATTATAGAGTTACCCTAAGAATTACAAAAGTAAA  
ACAAAAACAATCAGTGATAACCTAAAAATTAAAAATACAAAAATAACCTAAGGTTAAACAGCTCCCCAGA  
GAAACTTTGTTTACGTCAAAAATTTAGTGATTGAGGTTGAATAGACTGGAAATATTACATAAGCATAAAAT  
TCTATAAAATTTAGTTAGAGAGAGGAAGTAAAAATTATTACATCATCAAGAAATATTAGGCTGAGATCTT  
GACTGTTTTTTATTATTAGGACATTTTCATGAGTTATTAACATCAATGATTCCTTTCGAACTGATTTAT  
TAATAATTTGTAAACCTTCATATTTACCACGTGTGAAAAGTTGAAGTAAATAAGTTTATAAGGCATTGA



GATAATATCATTGGATGTTACAAATATTTGTGATAATGAGAACTGGTGAAAGATGCCGCAGGGATTATTC  
AACATTTGAATTTAACTTTAGTTTAAACCAGTTAAAATGTTTTACCCGGTTCTTGCACTGAGATGCTAAAT  
AACATCCACAGGCTCTTTCTGTTTCAGGTCTGGTTTTTCCAACCGCAGAGCCAAGTGGCGACGCGAAGAAAA  
ATTACGAAACCAGCGGAGGGTTGCCGAGCAAGCTGCTGTGGCGGCAGCAGCTGCCAACTCAGCTCCTACT  
CGACTCTCTCTGAATTCAGGTTTTTCCAAATTCTCTCTATCCGGGTATAGGACAACCAATGGCTAGTATGA  
CCGATTCTTACAAATAAGGGAAAAAATTTATTATTTTCATGAAATTACAGTACTTAATAGCACCTGAGAG  
AAATATAACGGTCAATTATTTTAATTTAGTTATATGAAGCAAATCACTAACGTTTATATGTTTTCAATAG  
TCTTTCTTTAATGCTGTATTTACTAACAGTATAGATTGGAATGTCTAATAGATTTTTTTATTAGCTTTCAT  
ATTTTATTATATTTTCATTTTAAAGACTGTCTCACATTGTTAGCTTTGTATGTGGATTCAAGACTAACCT  
AAATTTCCGAAGGTGGCTGAATTTGATGACATTATTGGGTTTACGACCGACAATGTAATTGAGAGCGATG  
ATACTTACGCAACGAACAGTGCCATTTTTTATAGCTAAGAACATTACAATAACTTGTTTACTGAGTTAGTA  
TTTAGTTTTGATTATTTGTAGGTAAATTACTTTGATCAAAAGTTACTGTCAAGTATTATGTATGAGATTTG  
ATAATATAATTTATTAACGCAGTAAGAAGCTAAAGTATTGGTGAATATAAGAATCTCAGAACTTGAAGAT  
ACGCTAAAAATGAAAGGAACCTTAATATAATGACATTTTTTAGTATAAAACGTTCAATTTTTATTCTTAAAA  
AGAATCAATTTGCAGTTCGTTAGGATTTGACTTGGAATTTAACTTATCGTGTGTTTTTAAAGACGGGGA  
ATGCTATACAGTTTCTTTTCATATTTACTTATACTTTTCGTAATAGATATTGTAACATATATGGATGATT  
ATTCAAACAATTATAGGTTTTCTTTCTTTGAAGAATAATAAAAGAAGTTTGTTTTGTTTACATTTTCCCT  
TTCTTTATCTTAAATATAGCAGTAATGCATCTATAGAAGAGCTTTTCCCTTTGTTTTTGTTTAGCTCCAT  
TCCACCGATGTCCACTTACTCCATGTCCAACAATATGGCACCTAGCTCTTGTCTTCAGCAACAAACACCA  
TCTTATTCCTGCATGCTGCCATCAGGGAATGCTAGAAACTATGACGCTCTCTCCCTTGGCACCTATAGCA  
GGCCTTCTTGTCTACAGCACAGCCATATGTCATGCAGCCTGTAAATAGTCAATTTGCAACGGTCAGCAG  
TGGTAGCGCTGGATCAACAGGTGATGAAAATTGTTGTCATTTTTTATGTAATAATACATTACAGCAAGGTC  
TCGAATTTTTTTGAAATTACAAATAAGCAAAATTGTCCTTCAAGAGATATAATAAATACTATCAACAGAA  
GCACTGCCATGAGAAACAGTGAAACAAATTTGTTTTAAATAGGAACTCTTTACGTCATTTTTAGAAACCT  
GGGCTTACTAGACTGTGTCTTGACTATCTTTCTTCTTGATTGTAACACCGAAGAACGCTGCTATTAAAAA  
CAGAAGAGTAGCATTTATAATAGATGTGTAACATTGTGTGTTTAAAGATAGTACTACTCAACTACGTGAAC  
TTTTTCAGTAACTATTATCAAAATAGAAGATAACTAGCCATGAACCGCCCTTGTAAAGAGACCGCGTTTACA  
CGAAATTCTCTACGACTGGAAATATGTAATGGTGATCCAGATTAGGTATCAAACCTACAATAATATATC  
GTAATGTTAAATGCATAAAAAACAATGAAAAAAAACCAAACCAAGCGCTTTCAAACCAAATATACGA  
ATGAAAGAAGGTCCATCTTTCTAAAACATTTTCAGGTTTGGGGATTTGTTTTTGTGAGTTTAAACAGAGC  
TTTTAAATCTTTTATTTTGTGTTTATATGTTGCATTATATGATTTCTGTCTTGTATTGTTTCGTAGG  
GATTGTAAGACAAATGACGGGTTTTGTCCAGATGTGTTAAGATCGTGAGGGTTAACTAACATTACCTGTT  
GCTTCCTCTGTAGAATACTCACAGAGCTGAAAATCTCTTTTCTCAGATTTTCAGATCTATGTTATAACT  
CAATCTTATAACCTTCTTATTTATAAAGTATTCTGCAATTTTCAGACTTAGGTTATTCTTGAATGATGTGA  
ATTAGTCACGCAGAATTATATAGGCTTCTAAATAATCGCACTCTAATCTCAGTAGTAAGATATGAATATA  
GATTTGTTTATATCATGATAGTCTTCATGTCTACTCCAGTTAGTGCAAATACGTATATTAGAACTTCTTT  
AATGCTATTAAATCTGTATACAACTATATGTTTAAAAAGTATAAGTATTTTTGTTTTTAAATATGTTTTCA  
GAACGTGTGTAAGTTGGATTATTAGAAGGTTGAGTTGAATGTGAGACTTTACCTTTATTTTTTTTTCTAA  
TTTAGGCCTAATATCACCAGGGTTATCTGTCCCAGTGCAAGTTCCCTCCCAGCCTGGTGAACCTGAATATG  
TCCACAGCTTATTGGCCAAGGATCCAGTGACCTGGGAGCGTCAGAAGCACATATATACAGGAAAGAGAC  
TAGCTTTTGACGCTGTTAATTAGCATCTGTAACCTACTACTCGTGTGGTTAAACCACGTGAACTGAGGAA
