# Supplementary material for: Evolutionary Conservation and Diversification of Five Pax6 Homologs in the Horseshoe Crab Species Cluster
Source: MDPI journal article supplement (doi:10.3390/arthropoda2010007), 2024-03-04
Supplement: s1 [file s1]

>CM022392.1:76309865-76381124 Carcinoscorpius rotundicauda isolate  
IMCB\_SINMHF\_001 chromosome 2, whole genome shotgun sequence  
GGAGATCCGCCCCGAGCTAGGCCTAACTCTCGTTCGTTGTGGCTTCCCGAGTCTGCAGTCATCACCAAAG  
**ATGCCACACAAAG**GTAAACATGATAACTGCATGGTGTCTTCTGATGTCTTAGTTTGTGCATTTATAAAGG  
TTGTCACCTCTCTAGCCTTAAGGAGTCAAAAGAACATTGATACTGGTTGATGGTAGTTTCGTTTCGCAATGA  
ACACTGTCGACGTACGTGGTGGCAATATGGTCCGTATAAAACAATTCTTAATGTTGTGGTACTTTCGTCT  
GTACGAAATACTAAATCATTATTGATATAGAGGTACTTCTGTCCGTATAAAACAAACAGTACTTGATATA  
GTGATATTTTCGTCCATATAAAACAAACAGTACTTGATACAGTGGCACTTTCGTCCGTATAAAACACAAG  
GTACACTGGATGCGATGGTACTTTCGTCCGTATAAAACACAAGGTACACTGGATACGATGGTACTTTCGT  
CCGTACAATACACAACTGATTTCAGTGAGCACAGCGTTGAAGGTATTTTCATGTTCTTAAATGCAGATGTG  
AACGAAATAAAATCAGCCTTTAGTTCTTACGTCAAAACGAAACATCTAATTTTTCAATGTAGGTCCCA  
TCTTGCACAGTTCAGCACAGAGGAGAGAGGGGATTAAGAAACAGAAAAACGAACAGTGTGAATCGAGA  
CCTTTCAACATGGGGATTATGACGTAAACTGGAAAGAAATTATTAGTATTTAAATTTCAACAAACGAAA  
ATACTGTATTTTCAGAGGGGATTTTTCGAAGAGGAAATCCACCATCGCCTCTTTAATTCGCTACTGTAT  
ACAAATAGACAACTAATTAATGAAGTGATTGACTAAGAATGTTGATCAACCAGCAACACTAGTTATTACA  
CGTACTTGTATCCAAACACTGAAAGCATAATTGCCAATCCATAACAATATTTTCTTCAAAGAACATCTA  
AATTTCTTAAAGCAAGTACATTTTTTACACGTGTAAGATAAACGCAAAGCCTTGTATACGACATAATACAA  
AAACAACTTTTTAATAATTTTGTATAGTGGTTATATATATTATAATCGTTTGTCTCGCCTAAATCGTATA  
AACGTTTACTTACGTATTGCGCTCGAGAGCCAATATTTTGTCAAGAGAGAAAACGAAACTCGTCATTGTG  
TGTAAGCACACGTCTTAAGACCAAGGTTCTCACGTTAGGCACCCGAAACCAATACGTCTGACCGTCCAA  
ATGTGACTCTGTTTTATGGCGTTCGATCACACATGAATATTGTATATGTATTTACCAAGGCTGCGTGT  
ATATCATGTGTTGCAAATAGAACTACGTGTATTTACGTACAAGAAACCCGTATTGATATCACACAATGT  
GAATGTATATATTATTTAGTCATTCTCTAACATCTACCATTGTTGTTTGGACGCGTTTTCAAAGGACTGC  
TCGAACAGTAGTTGTTAATATTTTCATTTCAGTATTTCTGAAGAACATTTAATCCGCTGGGGAGCAAATC  
CCACATCAATAGAACCGAATTCATGTTTTTATTTTTTCTGGGGGAAGGAGGGTAAATATAGAGAAGAGGC  
TAATTTTTTGTCTACCTTGAAGAGTGGTCACCTGCACTGAGCTTTCCTGTGTGTAACAGAGCTCAAACAAT  
GTTCTGTCAAATAGAAACGTTCTTTTTAACTTTTCGATGCTATTAGTTTGCATAGCAGGCTATTCTTT  
GTGTTGTTGTGGAGGCTGGACCACAATTGGATTTCAAGTAAATTAAGCACCGAAAAATAGACAGGACTA  
TATATGTGCATGCATTGTATGCCATGTTCAAATCCTTTTCGTAAATGTCTGTTTGTAAAGGAATATGTAAT  
CCTGTTATATACAGATAAGCGAAAGAGACACGTAAGCAAAGTAAAGAAACGTACTCTATCTCCAGCATG  
GTGAGGTTAGTCGCGATTTTAAACGCCCCCTTTCTTACTGCGCGTGCTTCTATGAACTTTATCATCAGTCA  
TACGCGCCCATGATGGTTTCCAGCGAACACATTCTCAGTGCGCGGTTCTTCCAGTAGCTCGTGTCTCGTG  
CACCTCGTGCTGTACATGGAGGACTATGTCTAGATGGGCATTACACCATTGAAGGTGAGGTTTTAACGA  
GATCTGTTTTACGTGTAACCAAGCTTTTGTTTTATTGTATTACGAGAAATATTTAGTTTCGAGTAAAGA  
AAAAACGCCAATGAATTTTCAATTGTAACACTTAAACATATTCTTATGTCACTAGTTTCTATATTAATAA  
TTCACATGCACGTGCTATCGATCCTAAATGTTTGCACCTCTTTTAAAGATTGAAACTGTTTCTCGTACAC  
ATTTTGAATTCATTAAATCACAAACAATATCACTTCATGACAGGAGCACCAGCACACTAAAAATAACCGTT  
AATTAACACTTGTCACTTGGTCTTTTGTGTTTATGCATATGTAACAAATCAGAGAAAACCTATTCTAACT  
CTCAAAGAGAAATTCATTCTACACGTGTTAAACTACAGAATGTAATAATAGGCTAAAGTTTAAAAATTCAA  
CTTTTCTTCGAGTTAAAGGGCTTTAGCAGGCAAAAGCAATATCGGACAGCAGGTAACGAAGTACGAATAA  
GGTAGAGAAATCTTAACACGTATGCATAAGTATCAATAAATTTATATTTTCTTATGAAAGCACCTTAACG  
TATCTATTTCTAGATAAAGTGGAAGCTGGTAGATGTTTATATAAACACGATAGGCTGATTTAATAAGTGC  
TTACTTGCTTCTTTATTCGTCGTTTCTCTGAGTAAGTTTCTTCGTGCGTTGCTATGCTTAGCTTCAACC  
TTGTATTGCAATATATGCTATTGGCTTAAACATTGAAACACAATGTTTCGCTTTATTAAACAGCCAATAA  
TCATTCTGTTAGTAAGCTTCTCCTTGTATCAGTTTCTAATAAACCGATTACATTTGCTCACACGGATAT  
CACAATTAAGTTTATGTTATAAGGTATGGTTTGCTTGTGTTTGAATTTTCGCGCAAAGCTACTCGAGGGCTA  
TCTGCGCTACCCGTCCCTAATTTAACAGTGTAAGACTAGATGGAAGGCACCTAGTCATTGCCATCTACCG  
CCAGCTCTTGGGCTACTCTTCTACCAACGAATAGTGGGATTGACCGTGACTTTATAACGCCCCCAACAGC  
TGAAAGGGCGAGCATGTTTGGTGTGACGGGGATTGCAATCCGCGACCTCAGATTACGAGTCTAACGCCT

TAAGTGGTCATGCCGGGCATAAGGTATGATTAATTAGTAACCAGTGCCTTTTTTTACTAAAATTAACCAGGA  
AGTGAAAATTTTCATGATTAGAATGGTTTGCCTTTTTTTTTTTTTTAATTCAGTAGTTTACGCTTTACGCGAG  
TCAAATTTGCAAAAATCATTTTTCATTAAACGTTATTGGTTCACTAATTATTGAAATTCACAATTAAGTT  
TTCCATAAGCGCTTCAAAATGATATAATATGATTTCATATTGAGGTGAACAAAGTTAAAAAGGCACTTGAG  
ATCCACATCTCGTCTGAGTATTTGTTTAATATGTGCCCTATTTTGCACACCTACCCGACGTATGAGATTC  
ACTTAATTTTGATAGCATCTAATATTCAAATTCGGAGCTTAATCCCTGCAGTAACACTGCAACTTTACAG  
AAGAAAATAAGCGAACGAAACATACCAAGATAATAGCTAATAGTTACATTGGTGAGAGTGTCTTAGAAAC  
TTCATAATTTACCTTTTCTTTTATTAGGAATAGCCAGACTTTTTTATTTTTGAATTTACATGTTATAAGCC  
CATCACAAACGAGTAGCTATAGGAATTGTTAATAAAGTTTAATAGGCCTTGAACATGTTAATAAATCAGG  
TTAATACTACTTGAACATATAGTCCTCAGTGACAGAACAAAGGTCGCCCATTGTATAGTTTTGCGTTAG  
GTAAAACACAACAACTGACCATTTTACGGCCATTTTCCAAGTACGTGCGGGTATGTTAATGATAAAATGAC  
AGTGAAATTAATTTTTTCATTTTAAAGTAATTAAGAAAGTTGATCAGGAATAAATAAAAGTGAGTTTGTTTT  
AAAACGTGTATAATAATAGTAATGCCTACAAAATATTAATTTTTAAAATAATCATAACCAGAAAAATAAAC  
CGAACTCATTCTTATTTTCTCTTCACACAAACGATTATATTAAGAATCATTACTTGTTTTTTCAGAGATC  
GGAAACCGTAATTGTTTTTTTTTTTTTACAATCCGAAAACCTATATGATAAAATTAACAAAAACCTTTTAT  
AACAGTCTTTCTCTTAAAAGGACTATTTGTGGATATTTTTTCTCATAACAGAACCGTCTTATAGTGC  
TCTTAACCGATGAAGAAGGATTCTGTGAATCAGTGTTCTGTTCTTCAGGCTTCCGCACGAAGTTAACTA  
AATATTTTTTAGCGTAATTACTTGCAACATTTAGTACCTTCCCAAACTATATTTAATTGTATTTGAAGT  
TAAAGCAAAGATTTTGATTTTAAAGGAGTTTGTTATTGATTTTGATATCATAGAATAATGGGTAAGTGAAG  
CTGACCAATTATCTTGAGCCTCACATAGAGAATTTGTGTGCGGGTATACATCCTTTTAGTCTCTATATAT  
TATTAACCAACCAACTTTGAATTTTCGCGCAAAGTTGTTGTTGTTTGTGTTGAAGTGAAGTGAAGTGAAGT  
GAATGGGCTATCTGTGCTTTGCCCACCATCGAAACCCGGTTTTTAGCGTTGTAAGTCCGCAGTCATACCG  
TTGAGCCACTGGGGGACCCGCGCAAAGCTACAAGAGGGATATCTGCGCCAGACATGTCCAGTTTAAACAGT  
TTAAGAGTAGATAGAAGGAATGTAATTAGTCATCACCAGCCACCGCAAACCTCTGGGCTTCTCTTTTACC  
AATGAATAGTGGGATTGACCGATACATTATAATGCCACACAGATGAAAGGGCGAACATGTTTAGCGTGA  
CGGGGTTTCAACCTGCGACCCACAGATTGGGAGTGCAGTACCCTAAACACCTGGCCATGCTGGGCCTTTT  
AAGAAAGTAATAACTTAAGATCTATGTCTGATATTTATGTTTATTTTATATTTTACTCTTGTGTTATAT  
TTATGTTTATGTTATATTTATATTTGTGTTATATTTACGTTTATGTTATTTTTATGTTTGTGTAATACTT  
ATGTTTATGTTATATTTATTTTCAATTAATTAAGTTTCAGTGATCTGAAACGATTTGAGCTAATCTCATTT  
TCTTTCTTGAGGACTGAGAGTCCCCTAGTGTTAGCGTGAATCTTTGGGTCAATAGTTTCGAGTTCCGTTT  
CTGCAACATTGCACTCCTGACGTTGGGGATGTAGGTTTTGTTATAAGAGTGACAGTAAAAATCCAACGAT  
TTGATTAGCTGTCTTTCCTTCAGTTTATAAATTCACAATTAGAAATACCTAGCACAGATTGCCCTTCTAT  
AGCTTTTCAAAAATCTAAGACAAACATTTTCCGAGTCATACAAAAACAACAGAAACATATCCTTTTC  
TACTAAGTAATCTCTGAGTTGTTGAATTAGGACAGTAAATGTGAGATCCGATTTCCCGCGATAAACGGA  
ATGCTAATGGCCTATTGTGTAGCTTTACGCTGAAACTAAGAACACCCTAACAAAGTAAATTATCAAACCTT  
TTGAAAGAATTTCATGAGTTATATTTTTTTCAGTATCTGAAAAGCATGGCAAACATTTCCACAACAGTTTAT  
ATCTTATGAAACTACGTGTTTAGTTGTTAGGTTTAATTTTCTTTAAATAATTCAACATGATATTTTTGT  
GGTTCTAAATCCTTAACACTAAGTTGGTTGTATCTTAACATTTTTTGAATAAATTGAATAATAGTTGTTCT  
TAAAACGCAAATAACCTTATAAGTTTCACTGAACATGAGTTGAAACATTTTTTGGGTGAGTGTGTGTGTGT  
GTTTTGAAACATTTGAGTCGACTTTTACCAGTACGTTGTGTAAACAACTTTTAATATAGATGTTGTTAAG  
AGTACATTTTGGTGAACAGCTTCTCACGAGTTCGTTGTTTCTAGTTATTTTCTATTAAAAGTAACGTA  
TTTTCAAGAACTTTATTCATTTATATACTTTAGGCTAATTTTTTGTATTAATTTCGTTTTCGCTCAAA  
GACAAGGTCTTGGGTAAATATTCAGCTTTCGTGGACATATCATTAGCATCAGCTCAAAATATTATACAGA  
AACAATAATTTAGCAGTTAGGAATGTATGTGAGTGAACGTTATTTTATAACAAATGCGTCAGACATAAT  
TATTACAGATTACGGTTTATTGCCCTTTAAAGAGAAATATAATTAATTTATAATACAAATAATTATGAAT  
TGTGTTAAAGATTTTCGACTTGTTTAACTTTTCAACAGTCTAGTTTTATTGTGTTTTTCGAAATGTCTTCC  
AGAGCTGAATTATCTGGTAAAAATATAAAGAGAGAGATGGGTAAATGGAAGGTAAAACGAAGTCTATATTT  
TATGATATTGTTTAGCCTTTTGGTAAATTAACAGAAAGCCCCTGTAGATTTTTTCAAGTTTTTAATACTT  
ATGGTTAGTTGTACAAAACTGCTAGAAGCAACTTACGTTTGGGGCTTGACGTGCGAGACTAAAAAAT

TCTTGCGAGAAGATTAGGCCTACATATATATGACCCATAACATGCGAATGGACAAGAAAGCTTTCTATTG  
GCTGTACATTAAAGTACATATAACTGACGCCTTTTGTCTGTCTGCACTTTTTTAGATTTTGGACCGGTGTC  
GTCCCGGCCCACTTCGCCAGTCGTCTGTCTCAGATCCAGGTTAGTTCGATAATGACATTTTCTTTTACAT  
ATTTTTGGGATTGTAAATATTTAAACAATATTTTGTACTCAAATGAAAATATTTACAGACTGGTTTATC  
TTATTTTTTATTACGTCTAAGAGATAACGTGTTTTTTCAGAACGAAAATGACAGTCACGAAAATTAGACGC  
AGCTTCACAAGTAGGCCTAAACTGTAATTAACATGTAACACAAGTGGTATCTCGTGTTATTGATTATTTA  
TTTCTAAAGTCACATGATTTTGAAATGTGTTTAATTTATAACGATTTGAATGATATCCGATTACTTGCGA  
ATTTACTTAAACGATTTTATCTTCATTTGAAAGGATTGAATTTGTAGACATGTTTTCCCGAATAAACCA  
AGGTCTGAAATGCGAGTTGTGGTCATAAAGGTCTAACACTAAGAAAATTGCCAAAGTACAATATAATAAA  
TTTTTGAAACATATTGGAATAACATTTTAAAAGGTGACTTTGGCTTTGATAACCTAATTTTTTATAAAA  
TAAACTGACAGTGTATAGTTCTTGCTTTATATTCTGTGTGTTACTAAGTTTTAGCGAGGTAATTTTCTCA  
AATTCTTTTTTCGGAACATATACTTTACCTTAGTATATGAGGCCTGAGTTTCATTAAAAATCTTCTTTTG  
ATGAACCACGTTCACTGTTTACATACAACGCTAAGGCTTTTATTTTTTCTAGTTTTAGCATTGATCAATG  
AATGAATATCAAACCACTACACTCAAAGTTCTTTATTTTCGGGGCGTAAACGAGTACAATAAGAGGATGA  
ATTATCATGAACAAGTTATCTTGACAAGTGGACAATACAGGATTTTCAGCCAGTGATAAAGATTCTTGACT  
TATTATAAACATAAAATGTCTTCTCTCCATGTAATTTTTTATTTTACAAATTGGCCAAACAATTAATTC  
ACAAAGTTCACTTACGTAAAGAATCTAGTGTATTTGATGTAATGCTACGTACATTGTCCCGGCATGTCCC  
CACGTAAATTTAAACGACGCTTCACAAGTAGGCCTAAACTGTAATTAATACATAACACAAGTGGTATCTCG  
TGTTGTTGGTTATTTATTTCTGAAATCACATACTTTTTTAAATGTGTTTAATTTATAACGATATGAATAAT  
CCGAGGATCGAGGGTTCAAATACCGGTTCGACCAAAACATGCTCTTCCTTTTCAGCCGTGAGGGCTTTATAA  
TGTGACGGTCAATCCCACTATTTCGTTGGTAAAAGAGTAGCCCAAGAGTTGGCGGTGGGTGGTGATGACTA  
GCTGCCCTTCCTATAGACGTACACTACTAAATTAAGGACCGCTAAAATAGATAGCCCTCCAGTAGCTTTGC  
ACGAAATTTAAAACAAAACCCCTGTTGTTGTTTTTTGTGACAGTCTTACTGCCCTCAGCACTAAGTGCA  
ATAAAAAGGGTGACACGAGTTTGTATTGATTCCACAGGAGTCGTGATGCTGTATTTGATTTAATGTTCCA  
TTTTTGTACCAGTTTGTACGTTAACAGTGTAAGAAAGGATACAACAAGAGCTTGTGTTGACACTTGTG  
TTCTAAACATACGAGCAGAAAATTGAGTTAAAAACAAAATATTTTATTAATCCTGTTTAAATCAGACAC  
AGAAAAAGAGATTTTTCCAACATGAGCAAATATTAGCTTTTTAGGTTTTACATTGTGAATTAACGTTTTC  
TGGGTTTTTTTTTAAATGGAATCCCGCTAGCTATTTAAACGCTTCCCCCAACCTTAAATACGTAAACAAAA  
TATCTTAAATATTGCTATTAAATTGTTAATTTAACATTAAAAATGAGTAATATTATTCTTCTAATACATT  
TCATCATTTGGCTGATACGACCGTTGTGACAGACAAAAACATGCAATAGCTTCATATACTGCTATATGAGG  
ACACTATATATTGAACAATGCACATACATAACAAGTCAGCTTTTAGGTTTAAACGTTACTTAGAAGAGAAA  
TGTTTGTATAATTTTATGATATACGAAACAAAAGTAAACGAAGGTCTTAAATCGTAAACACTGATCAT  
CAGAAATTTTCGCTTTTACATGAGTTTCAAGGTTTTTATAAGCTAAATGTAACCTTATTGTAACATTTGTTT  
CAGGCCCCGGCATGGCCAAGCGCGTTAAGGCGTACGACTCGTAATCTGAGGGTCGAGGTTTCGCATCCCCG  
TCGCGCCAAACATGCTCGCCCTTTTCAGCCGTGGAGGCGTTATAATGTTACAGTCAATCCCACTATTTCGTT  
GGGAAAAGAGTAGCCCAAGAGTTGGCGGTGGGTGGTGAGGACTAGCTGCCTTCCCTCTAGTCTTACATTG  
CTAAATTAGGGACGGCTAACACAGATAGCCCTCGAGTAGCTTTGTGCGAAATTCAAAAACAAATGACAAA  
GCATTTGTTTCGTATATGTCGTGCGTGTGTGTCTGTACTTGGAGAGTAAATCTTGAACCAAGTAAGATATC  
ACGTTTTCTGTGACGTCATACGGTCATCAGAATTTGTTAGCCAATTCTCGACGTTTTTCTCAAATTACATTA  
ACACAACAAAGTAATTACATCGAACGGGATACGTTTCAGAGTGTATTATTGTTTGAAATCACATGTTGCAGA  
CTTGGTGAAGTTTTCCAGGCGTTGATAGCCAGTAACGTGTAATTTCCCAACCTACTATACCTTTGGTTA  
CTGTCTGCTCAACTAAGTTTGAAACAAATTAAGGGAATATTTATGAAGTTGGTAGAAAAATAAATGATAT  
GATTAATTGTAAATAGTGATATGATTTATATCAGTGCTTAGCAGAAGGAAAGTTTAGATGTGTGAGGGGA  
TTTGTGTTGTGGGTGTGCGATGAGGCCAGCAAGTAGACAAAAAATAAAAGTCCAGTCAGGAATAATGGTC  
CCTCGAATGTTCTTGAATATCTATTGTTAGAAATGACGGCATAACTAGAAGTATTACCCTTTGTAAACAAC  
AATTGTACGGCGCGCCGGGAACCTTTCACGCGCTGTTTCAGTCGCTAGCTACACGTGTTTGTGTGGCGCCTA  
TATTC AACCTTAAAGCGAGCGCTGTTTTCGCGGGCACTTTCATTGTTTACAACAGCGGCTTCTCAAAAC  
CAATTTTAAATCTATTTTATGACATTGACAGAAGATATCTTTATTGAATCGTTTTTACCCCTCCTCAACGAAC  
TTTGTGATGTTTTAGGTCGTTGTTTAATTGATTCTAAGATTATCGCTTTTATTAATTCCTTCTGAAGCGA

AGTTGCCTCATAGGAATCGGCGTTTCGTTTCAGCTCATGATAGAGAGACCCGCTTTATTGGATTACCGTGA  
GTGGCCTATTAAATTAACCACTATAAAAGCAAATTATTTCACTAGCATTTTTCAACCTAACGAAACT  
ATATGAAGTAACTCAGAATTTAACTTTTTTTCAACATATTTATATCTAAAAAAAACCACAAACGTTTT  
AAAATTATTAAATGAATAGTTTAGATAGTCTTTAATTCTGACGATTTTTGTGTGCAAAGAAATTATTA  
TTTATGAACTAATATTTATCGGGGTTTTTATTCTGTAAAGTTTATGTGTGATGTGCTCAATTAAAA  
TAGAGATTTTATTATTCGCTTTCTGTATTTTCTTTTATTACTGTTTCGATTTTTTTTTAATCTTAGCATC  
TAGAAATCGTTTCATGTTGCTAAGGTTTGAAGTATCACTTAGTTACTGCCCTTGATGTTGCGAAAGAAAAC  
CTGAATTTATAATACCATCTAATGCGTATAATACGTATCAAAACCTGCTTTATATTTTAGATTATTGAGT  
AGGATGTTAAACATTGAGCTTTATTAATAAACGTTCCATAAAAAATATAGTTTAAAGTGTAAAGTTTTATGA  
ATTGTGGATTAAATATTCTGGTTTTTTTAAAGTTGAATCCTGCTGGCTTTTAAACGTTTTTTTTTTCTGA  
ACAATTTATGCGCTGTTTTCTTGTAGATTGCGCACTTTGTTTGTACATCGTCCCTAATTACATACGAGA  
CGATTCTAAATATGTAAGAAAAATGTCCTAAATATTGCTATTAAATCCATTTATTACTGTTAAATTTAACG  
TTAAAAATGACCACTTTTATAACGTGTAAATGACACATTTGCCACAACTAAAAATGTCGTTAGTTTGT  
ATACTATTTCCAAAAATGAACTCTTTCATTAATGCAAAATTAACTTTACTTCATGGCTTATCATTAAT  
TATGTTAAATACTACTTATCATACATTGAACGTGAGAATTTGTTGTAACAATTTAAGCCTTGGTTATGTT  
CATGCACTTAACGTGGTGACTAATGGTATCACCTAGTCTTCCGGCAGCTCCAAGTTTCCATGTGTGTTAT  
GAATCATCATTTGGAGACGGACTATTCTCTTTGTTACTCTGAAGACGAAACTGTGTATGTCCAGAAGG  
GCTGATGGATCGGTCATGTATAGTGACATTTTGAGTGTGTGTGTGTATGGATTATCTGCCCTCTTCTTT  
TATAAAAAATGTAGACAGGTTATAACCTCATTATTTTAACTCATCGAATGCTAATACACGATGACCTTTT  
CTAAGAAAAATAATATTATGTATACAATACATGCTATTTATTGATAGGAATTCAGTCGTTGTATACAAACA  
ACCGAATCATTTCTTAAACGCACAACGTTCTTACAATAAACAGAAACAACTTTTCATGCATTATTTGTT  
ATGTTTTATTTTGATAAAAGAGGTTGCTATCAAGATACGTGTTGCTAGTAAAAACACAACATATCAGTTA  
TTTATGACACAAAAATCTAATTTGTTATATTGAGTTACATGAAGTAAATGCGATATTCCCATCTCCAG  
TGAGTCAGAGGTAATTAGAAAACAAACCTTCATAGGTTAAATAAATTCATGGTTTGATATGGTGAACGA  
TATTTTAGCCTTGCGCTAAAACAAATAAACAATCAGATAAGTATACAGTATACTGGTTGAAACAGTTGTT  
AGTTAACCTGAATGTTATCATATAATGCTGAAATATATAAACATATATAGAAAGAAGCAAATAAAACAAT  
AATTTTCGTTGATGTTCAAAACGAAACGTTATGTTTTTATTAAGATGTTACATTTCTATCAGAACACTT  
TTAATCCTCCCTTTCTTGAAGAAAGATCTTTATAAATTTACCCATGAATATGACATAAAATTTCTGTGTTA  
GATATTCGATCTTATCCGATATTCGTAGATCCGAGGGAATCTGACTCATTTACTACACTTGTTTGTGTCT  
CAATGCTTGTCTCTTTGTAACAAAGAAACTACCATATCACACCACACACTGCCAAATTACTCTTCTGAG  
AGAAGCGTGTGTGTTAAAGGTTAGAGTTCTTACAAAGATATGTGTTTACAGGTTATAGCCCTAACCTGA  
ACGAGTGTTTACAGGTTAGAGTCCTAGCAAGGGTGTGTGTTTACAGACTTTTGTCTGACAAGTTTCAGT  
GTTTACATATTATATCTCTAACGCGAGTGTGTATGTTAAAGATAAGGGGCCCTACCAGGGATGCATGTG  
TACTCAGAACTATTTATTACTGACATATAAAATGTAGTGTAATTAATATATTTTCTCCAAATTACTTGT  
ACTTTCTTTATCCAGGACCCGGTATGGCCAGGTGGGTTAAGGCAAGGCGTTCGACTCGTAATCCGAGGGT  
CGCGGGTTCGAATCCCGGTCGCTCCAAAAATACCGGGGAGGCGTCACAATGTGACGGTCAATCCCACTAT  
TCGTAGGTAAAAGAGTAGCCCAAAGGTTGGTGGTGAGTGGTGATGACTAACTGTCTTCCCTCTAGTCTTG  
TACTGCTAAATTAGGGACGACTAGCGTAGATAGTCCTCGTAGCTTTAGGCGAAATCCAAAAACAAAC  
AAATTTCTTGATCATTTTATATCAACATTCCCTGCAATACAAGATATGTACTAAAGGACACTGTTGGGA  
AATCAGTTATTTGAAAACTTTTAAAGAAAAATCTTTAAATATATGTTATTTTATTGTATAATATTTGAT  
ATACGTATATGCGTTAAATGTTATTTTATTGTATGGTATTTGATTACGTATATGAGTTAAATGTTAT  
TTTATTGTATGGTATTTGATTCACGTATATGAGTTAAATGTTATTTTATTGTATAGTATTTGATACACG  
TATATGAGTTATAATGTTATTTTATTGCATAGTACTTGATACACGTATATGAGTTAAATATTGTTTTAT  
TATATTCAGCTGTAACTGCAGTAACGTGTTAGTTTTTGTCTTCTTAAACATCTATCAGAATACTATG  
TAAACAAGATTGTTTACAGTAGGCTGTAGGGGAGCAACAGATAAAAAATTACACCATCATCACAACTAG  
TATTATGGTAAATGAACTGATGAAGCAGACGATTTGTTATTTACTATAATACGAACAAAATATAACAAAT  
AACATCAGGGAAATACAAAAACAGATTCTTTTTTATCCGAACCTCATTTTTTACTCTCTTTTTTAACATAAT  
AAACATCAAACAATAAAAAATACATAAAGTTATCAATTCTGAAAAGAAAACAACAAAAACGTACTGTGTGT  
TTTTCTTATAGTAAAGCCACATCAGGCTATCCGCTGGGCTCACCGAGGGGAATCGAACCTTGATTGTAG

CATTGTAAGTCCATTGTCTTACCGCTGTACTAGTGGGTGGCAAAACGTACTCTTTTCAGGAATTATATCA  
ATATGAAATTAGATGAGGGGTCCAACCTCCCTCATGACCTTATGCCATCTTGTGTCACTGTATCAAGTCTG  
TTGCTGATTGATCGAGAAATGTAGAAACATATAAGGAACATATAATACTTAATATAATATATTAAGTAGT  
TTATAGCCTTAAACTGCATTTAAAGGGTATAATAGTAAATAAATAATTATTAAATCAGACATTATCACAC  
ACACTCATACAGCATTATTTATTTTACACTTCATATGCAGCTAATATTTTGCTGTTTTACATTAATTGTA  
ACTAAGTGAGGAGCTTGATTGACGGACAGAATCTCGTCCTTGTAAGATGTATGAAATCTTCATTTACGAT  
ACAAAGTTGACAACATTAGTATAGAGTTTTTAGGCCTGGGTGTGAGACAAGAGTCTTTTCGTTGCTACTT  
TAACCTCCTAACACGTACTTAACATTGAAAATTAACAGAACTAGGCTTAATTGATTTTAAACACAACCTTG  
TTGCAACTTGGCTTTATTAACCGTTTCTCAATTTTCCCTATTAGCGGTTTAGTAAAATGATAAAAAAAGA  
GAAATAAATGATCATATTTCTCTTCTAATGGGAGTTCCATTCTTTTTTGTTCACAAAGGCAGGTTAGGTT  
AATGTTATTTTTGTCTTTCTTCCAGTTATACCAGATAAAACAGGTTTTTCTAGTTGTAATAGGTTATACAG  
TTTGCTACTAGTTTTTGGCGGATTATAGTTTTTATTGTCTGGTTTTGAATTTCCCGCAAAGCTACACGAGAG  
CTATCTGTGCTTGCCGACCCTAATTTAGCAGTGTAAGACTAGAGGGAAGATAGCTAGTTATCACCACCCA  
CCGCCACTCTTGGGCACCTCTTTTACCACCGAATAATGGGATTAACCCTAACTTTATAACGCCCCACGA  
CTAAAAGGGTGAACATGTTTGGTGGGAAGAGTACTTGAGCTCAAGTGACCTAACCATCTGGCTATGCCAA  
GCCAATTTTATATATTATCTATTTATAATAAACTTTTAAAGTCTAATGTATTTTGACTTCAAAGGCAAAAA  
TATATTTACTTAACTCAGAAAAACAACACAAAACACAACGAATCAGTGTACCAAAACGTAAATTCTC  
TGTTACTCTGCGTCTGTTATACAATAATAACATGACTACCTTTTTTACAGCAGGTATGGTGTTCTATA  
TCTCTGTTACGTGACTTTAACTCTTTCCTACTGCTGTTACGCGAGGCTAACATTTTCTACCTCTGTTACT  
CATGAATAATTCTTCCTTTCTCTGATACAAAATGTTAGACCTTGCCAAACCGCCGTTACACAAGATTAA  
CCTTCTATACCTGTGCTACTGTTTCCAACCTCTTTTGTTCAGGTTAGCTTTTCCATACTTTTATTACGT  
GAGATTAACCTCTATGTCCTTCACGTGTGATTTAACCCCTTTTCTATCTCTTTTAAACCTTACGTACCTCTG  
TTACAAGGGTTAACTTTACTCTGGTGGTGTTAACAAGTATTAATAATTAATGTTAAGACTGTTGCTTTAC  
TTCCGTTTTTCGATAAATCAGGTAGTCATTAATAATAGTTCTGGAAGATGAATATAACAGTTCAGTCATTG  
CTACTATATATTAATTTCTCATCGGAGAACATTTTACTGATTTGGCTTTGAAATGTTGGTTCTAGAAAAGC  
TTCTGTGAACCCAGCATGTAATCACTTGGATCTATCTTTTCAAGTTCGATTTTTTTCTATTCTTTATATA  
TCTATTTTAGTTACTAACTTCAATAATATGACGAAATCAAATTGATCGTAAGGAACTAACTACTCGCGTG  
AATACCGTCTATTAGATCTTCACTTTTATAATTGATAGAGTTCTGAAGAACAAACCAGAATCCATAAAACC  
CGATTAAAACATTAATTAATATTTTAGCATTCTAATTAAGTATAAATATTATTTGTTAGTACAAGCATCA  
TACACATTATGTATCATAACAATAACACATTTTAGATTCCCCAGTGAGATTTGACTCCATGCGATGAAT  
AGGGTGCAGACAAGTCCATTGTGTAACTTTGCACTAGGAAAATAACAGCTGTAATATTGAAGGTTTTTAG  
AGGTAAATTTGTGACCTGCATGCTGCTTTAGTTTGTAAGAAATAAGTTGCGGTAAAAGAAACAAATATAA  
AGATATACAAGTGCTGTGCAATGATATTGGTATCGGATATAAATTGAGTGTGATATCTTGACTGTACATG  
AATGATTGTGGTATGTTGCATAGATGGAATGTTATAGATATAAGATATGACTGAATGTGATATGTAAAAA  
GTCATTGAGTGTGGTATATTATGCACACGGAATGTTATAGATACGGTGTATGATTCTAATCCGTTAAATA  
GTAAATGTGACGTCGCTTCCTTAAAGCTATGTTTTATTGGCAAAAAGAAACAAACGGTATACTAGAAGA  
AAGAAGAAAAGTCATAGATATATCTCGTCTCTGACAGGGTTGATGGCTTCTAAGAATCAAATACATTTTC  
AGAAAAGCGAAGGAACGTAAGGTGCGAGCTAAGTTTGAGCTGACGGTTTCATGGGAGAAACGGCGTACCTA  
TCGATCCAACACTGACATTAGTCAGGGGTGGAATTTATACTGTGACTTGGACATGGTAACAACGACGCCT  
GTAGAACCTTCTATAATTGATAATTTATCATACACTACACTTTTGAAATGAATACAGTGATAAGACAAGTT  
AGGAATAATAATAATAAAACATTAGTGAGACTTTATCAGTTACGTGCAGTAGTGAAATCTATTTGTGGC  
CAGCACCTTAAACCTTTGTGATGAAGTACTTGGTTTTATAAATGAAATGTTATTTAGTTACTAGTAATGA  
ATCCCGTAAAAAATGAAAGGAAACAAAAACATAACAAATTTAAATCCTTCAGCGTGCATTTATAACTTTC  
CAGCATGTAAACGAACGTGAGAAAAATATAGGGTCTTATAGCTTGAGGAAACCAAATTTCTGTTATGAGAA  
ATATATATTTTACATACTGAGTGTCTTCTCAGCCATCACTGGTCCCTTTAGTTGCAACAGTTTTCTTA  
AAAGCTCATTTCTTCTAAATACTCGCTCATCTTTCAAAAACCTTCTCTTCGTAACAAACGACAAATTAATT  
TCAGTCGATACCAAAATAAATCATTGCTGTAGAAACTCCCTTGACAGACTTTTATGTAACAGAAAGAGAGC  
CGAAACGTAGGAGATATTTACTCCTATGTTAGCGATTAAATTAACATAAATTTGAACGGACAAACAAAAAT  
AGGAAGTGTTATAGGAAAAAGGTAGAACTAGGCTTTGTAAATAACTAAATTCAGAGAAATCCAGCGTAAT

TGACTGACTAACTGACTGACATTCGGCTTTTGTGATTATGATTGTTTCTCTTCTGTTATACACAATAGAT  
GGCTCTACAATTATTTCAATATTTATTTGTTGTTGTTTAAGGCGAGGCCACTAAGACTATCCATTACTAT  
CCTTCGTTTTTTGAAATATTAACATAAGAGGGGGAGGTAGCCAGTTAGCAGCACCTGCTACCCATCGTCAA  
TGCTGAAGGATTGGCTGTCATTCTTATAACACGCTCATACCTGAAAGCATTGTGGTATCACAAGGTTCCA  
GAACCTCTGCCACTGTTTATACATTTTCAGTTTGTTCAGCTTTCTGATTGAAACGAATGCTCGTGTCACGTT  
GTTAAAAAATGTTTTGTGTAAATAGAAAACCTGTTTATTTGCGAAAACAAAACTTTAAAAAAGGAAGATA  
TGAACCTCGTTGTTCTACTTTACGTTTAAATGCATACAACGTTTAAACGTCTTCCAGTGAAGATAGGTTATC  
GTTATTTCTGAAAAAATTGCGAGAAAAATAATATTGACCTTCCTGAAGGTCAGTAAATATTTGATAATCTC  
ATCGATGAAGCTCAGAGGCTGTGATTTGTTTTTTTCATAAAACCTTCTAAGCACTGATCAACCTGTTCTAG  
TAAGTAGATTTTTTTAGTTTAAATTTGAACACATAACACTGTTCTCTGATTTTTTCACAGTTATGCTTTCAT  
GTTGGAACCGTTTCAAGGGTGAGAGAACACGAATCTTGTTGCTAACGTCTCAAATTCAGTGCTGGTAT  
ATAAATAGGGTAACGCATTTTGATTTTCACATAAATAGTATGTATTCTAAATATTTCCACGAGGGTTCGAGT  
AACGGGGAAGCCCTTGAATATACATATACTATAGGTTTACTGCAGCTGAATTATATCTTTCACGTTTTTG  
TTTTTTTTTAAACAGTGTAAGGTTTCGGTCATTTACGAAGATTAGGAAGCCAGAGATCTCCTCGCTACACA  
ATGTGTAATAATTGTATTTGTAAAAACACCTGAGTTGAAATAGGCAACACAGTCGTAATTTCTCATGTGGT  
TTAGGTTTTTGATACTGACACGCAAACGTACAAATATGTGCTTTTCATTTTTTTGTTATACACAGAATAAAA  
TTAATAGGCTTAGCAGTAGTCTACATGTCTGTACCCCTCCCCACAGAAAGGTATTTCCCTATATATAT  
ACATAGACAAATATCCATATATATTTGTATTCTCACTCAGGGATTATTTGATTTTTTTATATACACAAAA  
AATCTATACATATAGATACACAAATATCAATACATGTAAATTTATATATTTTTGTTTGTGTTTTAAGTAG  
GGTATTGTGTTACTTTTTGTGATGAAAAGAGTCGATATCTACTCTTATTCAAGCATGTGAATAACACCATA  
GAAACAGAAGACAGAAGCAAAACACAGTTTATTGTGCGTCATCATCTTCTGTATTTTAGCTACTGTACA  
TTAAATACTATTTTTTTCAATTTTACAAAAATACATATATTATCGCTTTTTACGTTAACCATTTTCGTGT  
ATAGTTACTGAATAAACATGTTTCGGACGAAACGTTACATCATAACAGCTGTTTGTATTTCAGAGTACTAG  
AGATAAAGAAATCTGTGAGTTGTTTGTATACTGTATTCTACAGACTATGAAATATCGTGTAACATAAATA  
TGATATGTTAATAACAAGCAGAAATGTTACCAAAAATGGCACGAGACAAGTAAGAATTGCTAAGTTATAT  
AACAATAATAAGTTTGATTAACACTTCCTGTATAAACTCAGCTTATAACACAAGTGTTTTGTAAAAATCAA  
TAATACTGTTCTGATGAATAATTTTATCTCATTGTTTACAAGTTCTGTGCTTTATGGATAGAATAACCTA  
TGAGGGATAGAGTGATCGACTCACAATCTACGAATCACGGGTTTCAATCCTGTCATCGAACATGCTTGCC  
TTTTCAAGTGTTGGTGGCGTTATAATGCAAAAGCTATTTCCAGTATTCGAAGTTAAAGAGTTGTTCAAAAAG  
TTACCGCTTGCGGGGTTAACTAGTTTCCCTTCCCTCTACTCTACTTGATTTCATAATTAGAGAGAGCTAGCG  
CAGATAGCCCTCGCGTAATTTGCGCGAAATTCGAAAAAGGAACAAAGCTTTATGTATATTAGCCCATATG  
TATATTTTTAAAAAACAACATTTGGTTTATTAGAAACATTTTAAGCTGGAATTTGAAATAACTTAAATA  
AAAGTTTCAGACTATTTCCAGACATTAATTTTTAATTATTGTACGTTAGTAATTTTGTTCGTGAATC  
AATGAACTGTAAGAATTTTCAATATAAATGGGTAATAATATATAAATGTACAATGTATACTACTATTAT  
TTGACTGAACGAATTTCTACATATGATGCCATTCTACAACATTTTTGTGAAAAACACAAATTTTCACACAA  
GTACTTATGTCTGACTTTATTTCTACACAATAGTGATGTAAGATATATGTATATCAGTATAACATTA AAC  
TGAAACATGAGCTCAAGAGTTTGTGTTTGTGTTTTGTTTTGTTTTGTTTTGTTTTGTTTTGTTTTGTTTTG  
CCTGTCCCTAATTTAGCAGTGGAATTACGAGCCTTAACTACCTGGCCAAGCCAAGGTCAAGAGGAAATGC  
TGGTTATCTTTGTAAACACCACAACCTTTCTCTCTATACATATAAAAACTGAATGATTAAAAATAAGTACATT  
GTACACAATAATTAGAAGTCAATAAAAAAACGTGATGTCATTCACTTCCTAGATCAATTTCTCTGATTTA  
AAACAGACATAACTGTTTGTGTTTGAACAAATAAAAAACAGTCCGGCATGGTCAGGTGTTTTAAGGCGTTAG  
ACTCGTAATCTGAGGTTGCGGGTTTCAATCCCGTCTGCATACTGCGGATATCGAAACCCGATTTG  
TAGCATTATAAGTCTCTAAGACCGTTGCAACATTTGATCTGAAGTGCGAATAATAAGCCATTTAACTTGT  
ATTCGTAAATGAGCACTTGGCAAAGGAGTTAGCTTTAAACCTTTGTATTTCAAGACGTTCTGCTTCAAAC  
GTGGAGGATGGTCACTATATATAGCAAGGCAGGTTAAAGCTAATGCTGTCTGCTTAAATCAGTGCCGTA  
GCCAATAAAAAAATGGAACAAGTCGCTTTGTGCAGAATTTAAACAAACAAACAGATAAATTTATATTTGT  
GAAGTATCTTTGTGCGAGGATGCAGCAGTATAGCCTCAAACCTGACTATGTCTGTGCCTGATGTATCCTCG  
AACACCATTCTAAAAGAGGTGTTTCTAAAATGTGTTTTGCGACTGGATTCACTTGACGGGATGTGGTCCA

TCTCCCAAGGATACCTTACGTACTTGATGGATTGAACTTCTACTAGTGTGCATACAACCTCTTTGGGTCGA  
TCTCATCTTCTTTAAAGAATCTGTTTAAACAGTTTAGCAAGGAGGATGTAAGAATTTTTATCTCTTAGGCT  
GCAGTTAGGGCTAATTACGCCATTATATGGCAATATAGAAGATCTAAAGCATGAGTACTATTCCACAGGA  
TCAAGATGTTGGGATGTTACCGATTTATATTATTTTCGTTAGGTACTTGCCAGTATCATGTGTGTTCCG  
TTATTTATCTTCGTGACATTAATTTTCAGGACGTTTCCTTGGCACAGTTACACCAGGACAGCTTGTTGTT  
TTTTTGCCTCGTGAGAAAAAAAATCCATTTCTTTAGGTGTTTTGTATACAGACGAGCTTGTTGGAGTCTT  
TTTCTTTTAGCTCTCTGTAAACTACGTGATGTGCAATCACGACTGCGAATATTTGAAGCAGTCTCTTTGT  
AGGTATTACTTATTTTCGATAAACAGAAATAAATTTAGACAAGACTTTATGAAATCTCTGCATGCATATA  
TATGCGGATATCTCTCTTCCCCCGCTACTACAGCGGTATGTCTACGGATTTACAACGCTAAAAATTAGGGG  
TTCGATTCCCCCTCGGTGGGCTCAGCAGGTAGCCCGATGTGGCTCTGCTATAAGAAAAAACACACACAC  
ACAGAAGAGGTTGAATGATTAATTATTTGCACCTCAGACCACATGATTGATTATAAGATGTTTAATTTAA  
GTAACAGTGAATAAAGAGAGGATGGTGGTTCTCACTATTTAAAAATGGATAGATCTTATCACAGATGTAA  
TATTACAAATTCAGATTACTTTTTAACTGTATGTAGTCCATATTATCAGTCGCTGACGAGACCGGTATTC  
CAACTTTTATTATCTTCTTGTGCAAGTAACATTAAACATAAAAAACATTGCCACTTTGATAGTTTAATTGT  
GTTGTTACTTTACATCACATAAAATGATTGAAATGTGAACAGTTTGATATATACTTCACGTAAGCTCCGA  
ATTACGAATATACACGTACACTTAAGCATTGGCATTAAATTACATTAACCATTGTTTTATTTTCGGATATTAT  
GTTAGAGGGCACCCCTTATATAAACTGAAGAGACTGGAGATTAACCCTAAATAGAATGAAAACTAGTACC  
TCAAAGTAGGAAGGAGAAAACTAGAACTTAGAGTTGAAGAACAAATAAATCCACGTGTTTTATTTATTTA  
TCTATATTACTTGAAACAGTACAGCTAGATGTGTGGTTTTATTTATTTATCCATATTCCTTGAAACAATAC  
AGCTATATGTGTTTTATTTATTTATCTATTTTCCTTGAAACAGTACAGCTATGTGTGTGTTTTATTTATT  
TATCTATGTTTCATTAAAGCAGTACAACATATATGTGTGTCTTATTTATTTATCTATATTCCTTGAAACAAC  
ACAGCTATATCTGTGTTTTATTTATTTATCTATATTCCTTGAAACAACACAGCTATATCTGTGTTTTATT  
TATTTATCTATTTTCCTTGAAACAGTACAGCTATATGCGAGTTTTATTTGTTTTCTATATTCCTTGAAA  
CAAGACAGCTATAGATAGGTGGTTTTATTTATTTATCTATCTGCATATTCTTCGACACAGTGCAACTATGT  
ATGTGTGCTTTTCATTTATTTGCATAAATACGCTTATTTTAGAACGAAAAATATGAATTTAAATAAGTCC  
AGATTAGTGTTGAAATGTTGGTATGTATGTGTGTGTAATTAAGTCTTAAATTTATAATTTGTTTGAAGGT  
GTTTTTATTACTAGACATAAGCATGCAGACACGAACTTCAAAGTTGAATAAATTTATTTTTCTGAAATA  
ATGTTTTGCATTTCTCTTGAGACTCGAATCTATTACGCATGTGCTTTATATAAACCTTATTTCTTACAAT  
AACGAATAATTTTACTATAAAATATGATCCATTATATATATGTCTGTGTTATAATCCGTCATCCAAAGTTT  
GTTGGCTTAAATACTGTAATTATTTCTATGTTATCTGAAAACGTGTCGAACGGTGTACATAAGTTTTAGAA  
TTTTTGCTTAAAGAAAGGATAGAAACATCCTGAGATAGGGTCATTTTCCACTTTATTATATACTTTTGAC  
TTTTAATTTGAAAGAGACACGAGTAATTAATAAGTTAAATTAGTCACTTGTTACCTTCACAAGGCGGTG  
TCTCTAACAGTTTAAACGAGTGCCCTAATCATTATTATAAGAATTATAATAAATAACGAGCGAATATTTTC  
AGCAGCTTGGATTATTAGTTTTTATACTGCACGTGCTACGTCGGGTCTTTCAGATATCAATAAACAGAA  
AATGCTAACCAACCATGCTAGATATAAAATAAGTCTTCATACAATAAGTTAGAGGTGTTTGATCGTTCAGT  
ACCCTACTGAATCTTTTTGTTGGAAAAGAAATAAGCATCTAGATAAAGGAACAGCTTAAGCCTGAAGCAT  
ACACTATATACACATAGAAAAACATACCAATATGTATATATACTCAAACACAATATATATTTATACACATA  
GTGTGAAGCTCAATAGAATTATGTATAGTAGCCATAGAACTGTCTAGAGATGTGGGGAGTTGCTTAATC  
ATCACATAATTTTCATGCAGTAAGATATGTGTATGTAAACCGTGAAGAGAAATTGCCAGAAGCTTAACTAA  
ATATTGACACGACTTTTTGCTTGTATGTAGAAGGCTTAAAGAACCGTTGTACTCGTTTACTAATTTAAAT  
ATGAACGTTATTTACATACATATATATTTTGGTGTCTATATCACATAGCACTTTTGTCTCAAAGCAGTTC  
AAACAGATGCAGCACTGTTATACAGACACTTCAGAGAAATTATACATTATCTTGTGTTAAGTGCTTTTAT  
CTCGTTTTCCCCGAAAGAGTTGAAATTGGTTTATATAATTGTACCGATCATGGAGTGCTGTTTAGAGTGT  
ATTTCTATGTATACAATCATACACACACAAACATATATATGCTCAAAGAGATTTTATTGCCCAAAGCTAA  
AATGTATTTGAATCAAGTGGTAGAAACCTTTGTGTGAGTCTCGTGTTCAATAATCCTTGTTTTAAACTCAG  
CTAACCCCTATTCCCCAAATGTCTATATCCTTTTCTTCTGTATATTAAGTTTATGAATAAGTTGTAAGCA  
GTTTTTTTTTAGTGTTCTCATTCTCTGGTGTTATAGAGAAACGCCAAACGTTATCGAGGTTTAGATACTAA  
CAGTTGTTTTCTCTTCATGCAGGTATATGTTTATGTGTACACAGAACTTCGACATTAGCATTCCGAGAAA  
TCCATAATTTTACAAGTCCATATTTTTTGCGTGAAATAATACTAGAATTTTGTGCGAAAAGATCTTATACG

TGAATAGTAACTATATATGAGAAGAAGCCAGAATAAATTTACGTGCTATTTTTGTACGATTTATGATCT  
TTTCAGACTTCTAACTGCCACTCAGAATTTAAAAGACACGCCCCTAATCCCTTCAATCTAAGAAATAC  
TTCTCGCCGAGGCCAATCAGAGCGTGTTCTGGAGAGCACGTGTGATTGTTATGGTGAGACTCCATGTATT  
TCGTGCCGCATGAATCGGAGCGTGCAACTTCGATTGAGAACGAAAATACACATGATAACCGTATTACTCT  
TCATCGGGATTAATAGGGACATATTTACTTCTCATGAAGCAAAGACATGACAAGTTTTCTTTTCGAGTTA  
CTTGCGGGAAAAGGTCGTATGAACTATCAAAGGTAACTTAAGAGACAAGAGGTATCACCTTATAATAG  
TACGAGAGATGGATACTTCTGACCATGGGCTTAAGATCCAGCGGATCCACTTTGTCTAGTATTTTACTGAC  
ATATTAATCTCATTACTTTTGTAAAAACATAACGTATAATGTTACGTCTTTCCTTTAGCTAACAGAAAC  
AATCCAAACGAACAAATTGAAGGATAGGCTAATGTGTCCCGAACCCTCCTGAAGGGAGTTTATTCGAGT  
TCAATATGTTGATTGAATTTTTCGAACAGAGAACAGTTATTATGACATAACTGCCAAAGTCTTGGTACATT  
AGTGAAAGAAGATAAATAGGTATTAGTTCTAATAAATTATTATTATTATTATTGGACATTTAGACTAATG  
AACTTCAAGAAATAGAACGTACGTGATTTTTTGTATTATAAGACCATTTTGTACGATAATAAGTTTATAAT  
TATTAAGAAAGTGGCACTTTAAAGGAAAGGTAGTTCACTTTTGGTTAGATCGGTCACGGAATATGCACGC  
CAGGTAACTCAGAACTGACCAATAGTAACACTCTTCGGAGTTACATTTGTAGTAATGTCTTCCACTGCT  
ACACCCGGAATTTGTGATAAAGAAGTCGCGCTTGTATTTTTCACTCGCAGTGTTTTTGCCTGTGACGTAG  
GTGTATAGAAGTTGTTAATAGTCATTGCAGTCACGTGCAATATATTCGTATCCTATTGGCCCGAACAATT  
CGGGTTACTTTAATCGGGCCTAATAACACACACACCTGCAGTAGGCTAAGAACTGACATGCTTTGTTAGT  
GTGTAGGTTAGAAGCTAGCGGATGAACGACAAGTTAGTTGGTAGTTTCTTCATTTGATTATTTCCATGAC  
AAGTGAAATAGATTCTGTTAATAGATGACACGATAACAAAATGACAAGAACTTCATTATCTTGAATGAG  
TTCAAAACGGAAGGCGCTGGATAGCTTAACTTAATATCTTATGTGTCATGACCTCCCGCAATTATGTGT  
CACTCCGAGAAATATAACGCCCTCCTGGTGATAAAGATTTTTTTTTCAAGATTACTTTGTCTTTTGTAAATTT  
AACTCAGCAGCAGAAATATGAACGCAATTCTCTGGAGAGAGCTTGAAATTTAATTATGGACTTTTATT  
AAAGAAAAATTACGCCGTTTGTAAGACAACCTAGTTCATACTTTCAGGATGGAGGAAAACATTGTTATA  
ACAACTCGCTATAGGTTCATTAAGATCAGTATAGATATTGTTCTATTAGTGCAAGCTGCACAACGGTTT  
ACTTGCGCGCTTTCCACAACGTTGTAATCTGTAAATTTACTGTAGACCCACAAAGAAGCATTAAAGTCAA  
ATTGAAAAATCAAATAACCAAGTGCCAAGGATTTTTTTTAAATATTTGCATCAACAAAGGACACTTACAAA  
AATTATAAATGTAATAAGACACGATAAGACTAGTTTTATTTTTTATTAGAAATTATGCTACTGAAGTTAT  
CTACTGTGATCCCTAACATCGAACTATTGATCAGAGGGAAGAAAGACAGTCAGCAGCACCCCTACCATCAA  
CTGTCCGCGCTAAGGGATTGACTGTAACCTCTTATAACGCTCACCAACTTAATGTGATTAAAAATTTTTAT  
GGCATCGAACGAATTCGAACCCGGCTCGCCAGCCTCGGAATCCAGAGTCCCACAACGGGTCCACAGACG  
TCCAATAAGAAACGAAAAATAGAAAGAAAGAGCACAACAGAAACAAATATACAGATAGATAAAATAGAGG  
ATTTACGTGGAAAAATCGTAAATTATTTCAATCATATCAGCGGGAGTGGTAATGTTACTGGGTCTCACAT  
CTTGAAGAAGAAAAATGGATTGTTGTATAAACGTTGTACAAAATATGTTGTGACAAAAACAGTATCATG  
AAATTTCCGATGTCTGTTAACCACAGTAACATGGAGCAGATTAACCTACCACAGCTCTGACAAAAGAGACG  
TGTATGTGTCCACGTATTTTCGTATCGAATATGAAAAATGTGCATACATTATTTGTTCTTTTCGTCCA  
TATCACTGTAGATGTTATAGTTTCTCAAACTGATATATTCCGCCAGTTGCATAGTTTTTCTTTAAAAAGA  
GAGAAGAAACGTTTGAATGACAGCTCCGGTAGTGTGACTATAATGAATTATGCAAGAATAGAGGACAAAT  
TTCAGGGGAAAGAAATCGATGTTATCACTCGGTCTTCAGTAAGTAGTGTCTATAACGCTAAGCGTCTTA  
TTCTACTGAAGACAAAGAGATAAGCTAGGCCTTTAATCCATACGGAAGGCTTGTCTGATTTAGAGCCAC  
CGTGCGTGATGGATATCACTGTGTGAAATGTATTTTTGACTACCGAATTCACTTTTCTGTCTTGTCAATTGA  
TTTAAGTTTCTTACGTATTTAGCTTTGAATAAAGTAGTTATATAAAGCAATGCCCTTTCTCTGTTTTG  
CGTATTAATGTTTAGTCGCTTGTTTACTTTTAAAGCGCAGAGCCACGCGATGGGGTATCGGTGCTCTCTCC  
ACCCTGGTGGACCAAACCTCAGATTTTAGAGTTTTAAATCTGTAAATTTACCCTGACACACCATGAGAA  
TGGTAGTTCCCTCAGATACAACAATCACATGGAATATTCAGTTTGTATAGAATTAGAGAGACCTTGATTTT  
GAGAAATTACAATAACTTCTTCCAAATGATTTCAACACTACTAAAAGATAACAGGATCCTTATTAATCA  
ACACGTCTACAGGCTTAATAAGAGCAAATGAAACGAATTTTTTTTCTACTTTCGTTTTTTGCGATTTAG  
AATTTTCTTTTGATTTTGACAATTTGCAAATTTATCTATCAGTTATTGTTTCATAAGACAGTTCCTACTAG  
TGTGTTTTTATTGGTTCCCAAAATAAACACATACAAATATAACGACGTTCCCTAAAGCGATACGGTATTAA  
AAATGTTAGAATCACGAAGTGCTTTGGTTTGTGCGAGTTCGATTTGCCATGTTATTTTACATCTTTAGAT



TTTTGTTTACGAGCTTACAACATCTGCTGTCTTCGTTTTTCGATATAGTGTGTTTTATAACTACCTGTTTA  
TTGCATGAAATTGTAAAGTATTCTATGTTGGATCTGTTTAACATTATTTTCTTTCTTTCTTTCTGCTCCA  
AACAAAATAATATCATAAACAAGCATGCTCCTCCCCATTGGCATAGTGGTATGTTTGCAGATTTACAACG  
CTAGAAACCGGGTTCGATACCTATGGTGAGTAGAGCACAGAGAGCTCATTGCGCAGCTTCGTGTTTAAAC  
TTTAACTGAACAACTAAACGAACATAAGTGTATAGAAAAACAACCATTTGTTATTCGAGGTACAACATG  
TGGTGTATCAACCAGACCGACACCTTATATAACACATCGTTAAACGGCCCGGTGAGAACTTAAAGACT  
CAGTCATAACAATCCTTAATTTCTAACCATCGACATCAGTGATGAGATGCAGTCAGAAGCACCTACCGCC  
TACACCTAACAAAACCCAGAGATTGATCAACACTTTTATCACATACTCATATCTGAAAGTACGGAGTATG  
GTAGCAAATCATGGATTCTAACCTCGGATCTTTTGATCATCCGCTCGATATATTAACGACTAGGCCCTCTC  
CTATATAGCCCTCAATTATTTGCGTAAGTAAAAAAGAAAACTTGTATGTAGCAAACAACATACTTTTTTTG  
ATGTGTATAAGTAAAAACATAATTCATTTGTCAAGTGGTTACAATACTTAGTCACGTGAACTAAAAATTG  
ACCACCCAATGTTATGTGTAATAATATATATATGTGTGGGAGAGGAACACATAATAACTTTCTACTGTAA  
TATGAAACAACGTTTGAATAAAACGAAACCAATTAACAACCTATAATTACTCTGCATGAAACATTTAG  
TAGTAGGTGAAAAAAGGTAAATATAAAGCTATTTTTGTAACCTCAACCCCTCTGAACACTAACAGGGC  
TGTTAAGAAGTAATACGAATAACTCCATTGGTCCAATTTAATGTACAGTTAAATGTGGAAAACATTAAGT  
ATTACTAACTCGTACTTACCTTGACCTCAATTTCTTCATGTCAAGGTAATTGAATGTGCTTTTCATCAGTT  
TTAAACAACCTACACCGTTCAGTCTTGTCTTTGAGGTATGCAACCTATAGGATTAAGCTGCTGATCTCTA  
TTATGTGTTAATTAAACCAAGTATTTGATCTTACACAGTTAGGCCTACACAGAATGTTGGTTAGGTACC  
TTTCAACATATAGTATTGTTTTGCCGACCATTCTTGGTCTTAGTATTAGTCTCTGAGCTTTAATACGTCA  
AGAAATATTAAAAAGAATTATTTGATAATTTAGTTTACACATTTCATATTCTGTTTTTGTAAAGCACAAA  
AGTCGCATAATGGGCCACCTGTGCTATGCCCATTAATTTATTGAGCCCCGAAATTTAACTTTTATAAGCC  
CACAAGCTTATCTCTGAATTGTAGTATGGATGGCCAACTTAATGGTTTTTGTTTTAAGCAAAAACTGC  
ACAATCGGCTATACACCTTTTGTCCACTATGGGAAATCGAGTCTCAGATCTTAGCATAGTCAATTAGTAA  
AGTTACAACAGGCACATCGGTGAAATTAACATTATTGAAAAGAATGAATGAAGCTGTAAGTTTGTCAAA  
ACTACTGAAGTCAATCAGTCATTACGTTTCATAGTATTTCTGTTGGTAATTTAGCAACGTCATACTTTCAT  
CTTAGTCAGAGTGATTCAATATTACGAACTCGAATAGAAATGAAATCCAGCAACAATTTGAATGTGCAGA  
AAAAGTAAATTCCTTCTCTCTTTCTCTGTATAATTTCCATGTTGAGACTGTTTTTCATAAGGTGTTTTAC  
TTTGTGTTGTGAAAAATCTTAGATATGAAAAGATAACAGCCACAAATAAATCTTCTCTTTTCTTAAAAAGA  
AAGTTTTTTTATATTTTCGTGATTTACGTTAGACGTTATTTGAACTGTGTGTGTGTTAAGCTTAAAAATAA  
ACTGAAAGTGAAGGTCAGAAGAAGTGATTAGGTTTTGAAACATCTATAAACCCGGATCTGTCAGTTAAG  
TTATTTTGAATGCTGCGGTATTTTCCCTGGTGACAACAGAGTGTACAAGATACATCTAAAGAAGCTCAG  
ATGTTGGGTTGGTGTGCTGGCACAATTCTTGTACGTTCAAATACCTAGTCTCTTCAGCTTATCTGCT  
GGATAATTGACAAACCTATCTTATTATATTATAAGAAACAGGCACGAGAAACAGTGGTATTAGATACATA  
GAAATAACGTATTTTGTCTTTTAGAAGAGTTCGGTATGACAAGGATATTAACGTTTTTGTTTCGAAAGCC  
TGTTATCTAATACATAGTTGAGAATTCAAGTAGTTGTTGGTTTTTACCATTTGTTTTCGTGTACGAACG  
GATGGACATGGATTGTGTTGACAATGTATTGTGTATTAAGAGCAAACAATTAAGATTATATTGATTTGTT  
TTTTTATATTCGGGATACAACGCCAGACCATTATCAACTTTCACTTGTATGAACCATATCCAAAAATGTA  
CTAATAAAATCCAACTAAAAATATCTAGCTTTAGGTAATGAGTTAGTTATTTTAACTTTGTGTTATTGTCT  
CGTTTTTAAATACATCGTAGTTTTTGTCTATAATAAAAAAAAACAGTGTCTGCTAGTCCATCAGAACGTTA  
TGCTTGTTTACAATATATATTACCCAGAAAAATGTTATATATATAGAGTGTTTAGAATATTCAAACCTAGAT  
TACCAAGAAAAATAATCACTTTTATTTTCGTGCCTTCATTTTGACATGTATTTACCATTACCAAACCTTC  
AACTGTACTCTATTTTCCACCTTCATTCTCCTTATGCGTCTAGTATTACCAAATTTCAATGATGCTTTG  
CCCGGCATGACCAGATGGTTAAGGCACTCAATTCGCAATCTGAGCAAATAACAATGATACTTTCCACTT  
TCCCCACACATCTGGAACTACTGGTTTATATATTGCTGTAAAACATAATTATAACTCCATGTTTTTTTT  
TCCCTTTTGTGTGATACTCGAACTGAAAATAAAAAATATACAATTGAATTCATTTTCTATACATAAAAAGGAA  
CCGGCTCCAAATGGCTGAATTTTAAACGAGCTTTCCTGTTAGCAGAAAAAATTAATTTGCTTTCAAAAAAT  
GATAAAAAAATCGAATATCTTTTATATAACAAACGTTCAATTGAATTTCTTTTATCGTTACTTGGTTT  
CAATTAAAAAAGGAAGAGAAAAACAGTACAAATCATTACACACGTCTTCATCACATTGCTGGGCATA  
TTTCTTGAAGCTGCGATATTTATCTATTGAAAAAAGTTTTTCTGATGTGGGTTTAATCAGATGGACAAG

ACGTGTAATTCTTCTATTTTAAATTCAAACGTGTATACCTAATCCATAAAGCTTGTCTATTTTCTCCACAG  
GACACAGCGGTATCAACCAGTTGGGAGGCATTTACGTCAACGGACGGCCGCTACCTGACTCCACACGACA  
GAAGATTGTAGAACTGGCCACAGTGGTGCAAGACCCTGCGACATCTCTAGGATTCTTCAGGTGTCTAAC  
GGTTGCGTCTCCAAGATCCTCGGCCGATACTACGAGACCGGGTCCATTTCGGCCCCGGGCCATCGGGGGAA  
GTAAACCCCGTGTGGCAACCCCGCCCGTTGTGAACAAAATCGCCAGTACAAACGAGAGTGTCTTCTAT  
CTTTGCTTGGGAGATTTCGGGACAGGCTATTATCTGAAGGGATATGTAACAACGACAACGTTCCAAGTGT  
AGTAATATTCAATACGTTAAAAGCCTATTGCACGTAAACAAGCTTAACTGAAGCTCCCTCATATACACT  
AAATCAGTTCGAACATTCCGGTCTGACTTATCACCAACCTAGGACGTTCAAGAGTAAATCTGAACGGCTT  
AGATGCTTTCTTATTAAATCCAGCTGTTTAAATAGGTACTAATACGCGCAGGTTTTGATAAAACAAGTTG  
TTATATATATGGATGCACAACAGACGGCCTCACGAAGGGCCACTGAACAGAGGGACTGATTCTTGTGTTGA  
TTTGTTAACGCTAACATTTTGATACATGAGATAACAGGACGTGCAATAGTAAAAGAGATCCTTTAACTCT  
TGTTATTTAATGCACAGAATTGTTGACAGAATTTTTCACGTTAAATTCATACAATGTTTTAAAGCTAATT  
TCCAAGTTGATTACAGATTACGTTGTTTTGAAAACCGAGTTCGAACATATATACTAGAATACAGTACATTAC  
TTCACGTACTGTGATTTCAAACTTTAATTACCAATGCCACTGATATTTACAATACAGTATCGTCTCTT  
CTCCTTAGATTAGCATACAGTATCTTTTATCTATAATACCTTTAATGTTTAAATTTCTTTATATTTAATT  
TCACATCAGATATAAAAGTGTGTATAATACAGCGACGAAAATGCGGATGCTTTCTCGTTCAAATCATGTG  
CAGATAAAATGAGCGTGAGAGTTAATAACCTAATACTTCCTTTACTATTACATTTACATATTGCCGTTAC  
CAGAGAGAAAGATTTTCGTTTCAACATTACAGTGTATATAAATGTATTTATTTTCGGTTGATCATTCGTAGT  
TTGTAATAATTTCAGATAATTAATTTTTTTTATTCTTTTAACTTTTAAATAACTTAACTATGAGTATCATT  
TTCTAAGTCACGTTTTTAAGGAAATCGAGCATTCAATTTGTTATTCTACATTATTTTAAGTTTCGACGTCAGT  
TTAATTTTTTTTTTCTCTAATTCATGTGCTCATAATATATGGTAAACGTCGTCCTAGTAATTTTAAACAC  
TCGAACCCCTGGTAATGCAGCAACATTATATGTTATTGTGCTCTGCAGTGATTGCCCTACTGTATTTTT  
GTTGGTTGTTGAATTTTTCGGGTAAAGCTACTTTAAAGCTATCTTCATTAGCCCCCTCCTACTTAATTCGT  
AAGTAGTACGGTAAAGGAAAGGCAGCCATTCAACACCATCTACCACAACTGATGCTGTTACCTTAATTG  
AATAGCGAGATAGAATTTGATTGTTTCTCTTCTAACACTCAAAATAGGCAGCACGAATGTTTTGTTGTTG  
TTTTCTTGAGCACATTAACCACTGGGCCACACCGTTCCCACTTTGGTATGATGAGACATTTTATAATCAT  
TGTGTCCACTTAATATTATAATTTTTTGTAAGACAAGCACTAATATTTACCCTAGTAGGAATTTAAAGTAT  
TTAATTTCTTAAATACTTGTTTACTTGATAAATGTTGTAAATGGTCATTCTAAAGAGATGTCTCACCTACA  
AGATAAACTCATAAGCATATATCGTGTATATGTAATGAGAAATATTGGTAGAACAAACATTACCATAGAAG  
TCTTTTTAAGTGTTTATGTGGGGAACTCAAGAAATTTGTATAAAAACAAAGAATTATTTAAGATAAATT  
ATCTTCTTATGTGACGAAATTCACAAACGTTTTGGCTATTTCGTGGCAACGTTTCGATGCTCAATCCTGAAT  
CTAATTAGAACTACTAGGACAAAGTTTGATTATAGGGTATTAGTGATGACATCTGAGGCAACTGTTAGA  
AATGTTGTATGATAGAATTATGTAACCTCAGATAAACATGCATAAAATCAAATACATTCTTTGATTCTGAC  
CTGCTTATATTTAATTCCTAATGACAACAAGAGAAGTCCCGTCATTCTTTTTTTACACGTCACAACTAGA  
AAAGTCCCATCATGTTTTATTTAAATTTTATAATTTTGCTGAATAAGTTTAGAACCATTTATTTACGAAT  
AAAACTAAATCATCTTACAATCCAGTTTTAAGACTTGTTTTGCTCAACAGTCTGATATGTTGTTGCACC  
TAATATGCACAAACGTTTTAGTTTTAAAAGGTTAAACCTTATATTCGAGACTTACAGCATGAATAGGCAA  
ACTCAGAATTACATTTTTATCACTAAGTTATATTATATATGATTTTGTGGTTATTTTATTTGCAATTTT  
ACTAAGTATTTATGTTAACGTTTTTCAAAGACAAAATATTTCCGTACATTTGAATCCACAAATGAACTGA  
ACTGTTCCGATCCAAGAGACTTCTTTTTTATCAATCAACCTACAGTAACCTAAGGTGTGTAGGTTTCAC  
AACACACGATACATTAATTTTCAGGTAAACATTTGTTTTAAAGAAACGTCCTCGTGCTGTGAAATTGGAAA  
TAGTTCTTAACTTGATTAGATTTTTATTTTCAAATAAACATCCCGCTGGATGAAATTTGGATTATTTCA  
GAGAAAATGAAGGGTGGTTCGGGTTTCAAGCCATGTTGGCTTTCTTAACGATGTTTTTTTTATTCTTTTCG  
GTGTCGTCGATGATTTTGAAGTAATACCATTACACTGATATATAGCACTTTTAAATGCATGTTAGAAAAAT  
TAGAACATTGTAATCATAATAAAACAGAATATTGCTGTAATGTAACACTAGTAACACCCAGTATAATATA  
ACCGAAAGATAACCACTTAGCGGAGGAATTTTATCCCTTGTAATAACAAAGAATATGGTTTCGATGTAAGA  
TTCGTAATTAGTGTGATTTGTAGAAAACGCATATCACATCTTCTTCTATTAGGTACATTGGTTAAAAAAC  
ACAAAAGCAGAGGTGTAAGCCTCCGGAGGGTGTTAATGTGGTACCTCGTGTGTGACAATGTTCCCTTACT  
GCTTCCGGAGGGTGTTAATGTGGTACCTCATGTTGTGACAATGTTCTCACCAGGAGTTTCTGGGTGATT

AACTCTTTAATCATGTCGTAGATCGCTTG CATATCCTGCAAATGTAGCAATACGATAATAAAAAAGTTCTT  
TCTCTATCACAAACACATATCAGGGTTTTGAGACGATTATATGTTGGCCGTAATTATTCTTTGTTACCGT  
CTATCCTTTGCTTGTCTGTTGGGTTTCAATTCGTTTCCTTCCCAGCACATTTCTTTATTTATCACAGTTCAA  
ACTATGATACTGATAAACCGCAACGTTTCGGTACACAATAAAAACTTTTGAAGACACTGGTTTCACTCATT  
CTATTTCTGAAGGAAATTTATTAAATTAACGAATTCAAAGTTTTGTAGACAAAACAAATTAAGAAATCTA  
AACGATGTAAACTACAGTGATATAAAATAAATGTATATGTTTTGGTTTGAATTTTCGCGCAAAGCTACACG  
AGGGCTATTTGCGCCAGCCGCTCTCTAATTTTGCAGTGTAAGACTAGAAGGAAGGCAGCTAGTCATTACCA  
CCCATCGCCAACTCTTGGAATACTCTTTTTTAACAACGAATAGTGGGATTGACCGTAACATATAACGTCAC  
ACGGCTGAAAGGACGAGCATGTTTGGTGCGATATCGTGGATATCCCTCCTGTAGATTTGCGCGAAATTA  
AAAAACAAAAACCTTTCAGTGCAAAGCCACAGAATAGGGAAAATGTGCTATGTCCAAAACAGAGAATCGA  
ACAATAAATCTGAGCTTTGTAAATCCTTAAACTTATCACTTACACACCGAGGTACAAAACGCTTATTGTA  
CATACATGTGCTGATTACAGTTTTCATAGTGTGCAGCTTATAATTTTGTGTAAAACAGTTTGCTTCTGAAA  
GAAGAAAGGTCCACATTTTCGAAAGACCTCGGGTTATTGGATTTGTATTTCAATTTCTTTCATTACGAACG  
TACGTGTTATTGTTTAACATCATGAGCTGTTTATGGAATATGTTTATGTTAGTAATAACAACTGTTGTC  
AAGAACATGGTGAGGTTATTATTGTTTTCTGTTTCTTATATTATATATATATCAAACAGTTCATATTATAT  
ATATATATAACATCTATACTAACTGTTAAAAGATATAAAGACAATAAACGCAATTCCTTCAGCGGACCCGC  
ATTATTTGTGCGGGATCAATTTATTGATGTAAGTAATAAGGCTTAATTTGAGGTAAGCCAATGCCCCCTCT  
GTTTTCTCGGTGCGGCTAACAAGGACAATGAAATTGCTATACACTCCCTAGCGGTTACAATAAGCCAATT  
TCTGGCAACAGTAGGTGGGAACTAGAAAAGTATTTACCGACAGTTAGCCAGCTTGTTCACTGGCTTTGAAC  
ACTGGTAACGTTGTCTGTAACGAGAAAGTAGCGGGCGAAGCAAGCGGGCGCTAGTCCATGTATCGTCTT  
ACCGGTTAACCTAACAGATATAGTTTTTATTAAATGTTACACATTAAGACTGAGTTCTTCTATGAAATGT  
ATTATGAAGCTTTCTTTGTAATAAAATGACCATAACATTTGATTTATGTAATGAAAATATCAAAGTATGTT  
TTTCAACTTGTACTTCAATCTGATTGAAACAACGCCCTCTATTTTATCCTCACAACTTGGACACGGTTTG  
TTTAGGGACCTGAATTATGATTGATATATGTATATATTTTCAATGACATTCAATTTAATTAATTTCTTCT  
CTTAAAAATGTGAGATTGAATATACTAGTAACGATATTTATAAAATTCCTTAAGTCTCCAAAGTCCACGA  
GAACAGGTGAGCTGATTCTGTCTCGTACTCACGTGTAAGTGCTCGTTCTATATTTAAAATGAATTGTCA  
CAAGTAGTGTACCTGAATGATTGATCCATGTAATAATCAACGAAGAATCTATAAGCTTAGACCATCGCGC  
CGCTATATCTCATTATCACACATTATTGTAAATTGTGTCAATTGAGTCCAGTACGTTTTTTCTTAGGTTTC  
TCTATAAATCAGTAAGTGTGTCAATTAATAGACCACCTTACATTTTATATTTGAGTTTCTACAGCTACTTA  
CATCGTTATCTTGTGCCGAGTAAATGTTCTATTGTTTCTTAATTGGAACGTGTAAATCAAACGTGTTTAT  
GCTTAGCAACATTAGTTTACAAGGACTCCTTTGGCTTTCTTCTTAGTTAATGTACAATCAACAACTTTCA  
AAGTACACACTGTATATCGAAACGTGTCGTTTTTTTTTACATCTGTAAAGAAATTTTATTTGGATTTTCAA  
ACCTGGGAATCCAATCATAATGCAAGAAGCAACTAACAAATACGTGTCACAGTACAATATGAAATGATAGC  
TTTGTACTTTTGTACATGTCCTTATGTTGGTATATTTCAAGTGGAAATTGTATTGAACAGGCTTTTCGCA  
GAGTAATAACGTTAGTATTAAGGTAAAAGTGGTAAAAACCTAATACCACTCGAGTGTACGGCTCCTTTTCG  
AATAGCTTTTTTTTAGAGCTAACATTTCTTAGGCGCCTAAGGTAAGTAATAGTTATTTATTTATGCATATCT  
TTATTTATTAGATTCGGGTGCAACCTTAGCTACAGACTTTGGTGATTTCTTCACTAGAACGCAAAGCCTTT  
AAAAGAGCTAATTGTTTGTATCCTCTGGTTAAACTCTCTTTACTTTGTTTCTGTATGTGTATATACTTA  
CACACAGACCGTGTGCATGCAGTCAGTAGCGGAAGTAAATTACTACCTCGTGAAAAGATGCAATATTGCC  
AGCTCTCCGTGCTTAAGCGAGGAAGGAACAAAACCTGATATCAATTTCTCGCGGTACGTAAAACACGTGCG  
ACGCTCAGTGTAGGACATAGTTGTAGGAGGAGGGTTGGCTCCGGTCCACGACACGTCACTGACGATCTCA  
CCGAGGCTTGGAACAATGCAACACCGTGACAAAGTACATTACTTTATAATGAAAGACCACGAGGTTAT  
TTTGTGACGCTTGAGCCAGTACTGTATAATCTAAAAAGTTAGTGTCTAGAGAGTTGTATCCTGGACTTG  
ACGTCATGTTTTCAGCGATCCACAGGATGCAATTATGATAAATTGTGCTTTGTGAAAGCGATCGACTGCCG  
TTGTATAAGCATATTTAAAAATAGTACAAATTAATGAAGGTGTTACCAAAGTGATATTAATGTTTTCAGGCT  
TCAACGTTGCTATTTCTTACAGAAAACAGTTTGTTCCAAAGTAATGTTAAGTACCTCCCTTTAATGAAATA  
TATAAAAAAGGCGTATTACATCATTTTTTTCAGAAGGTATTTGTTATGAAGCACAGAACATCATTTTATAC  
AGAAGATGTTTGTGTTTGAAGCACAGTACATCGGTTTGTACAGAAGGTGTTTGTATGAAGCACAGTACAT  
CATTTTATACAGAAGGTGTTTGTATGAAGCACAGAACATCATTTTATACAGAAGGTGTTTGTATGAAG

CACAGTGCATCATTTTATACAGAAGGTATTTGTTATGAAGCACAGTACATCGGTTTGTACAAAAGGTGTT  
TGTTATGAAGCACAGTACATCGGTTTGTACAGAAGGTGTTTGTATGAAGCACAGTACATCGGTTTGTAC  
AGAAGGTGTTTGTATGAAGCACAGTACATCATTTTATACAGAAGGTGTTTGTATGAAGCACAGTACAT  
CGGTTTGTACAGAAGGTATTTGTTATGAAGCACAGTGCATCATTTTATACAGAAGGTATTTGTTATGAAG  
CACAGTACATCGGTTTGTACAGAAATTGTTTGTATGAGGCACAGTGCATCATTTTATACAGAAGGTGTT  
TGTTATGAAGCATAGTACATCGGTTTGTACAGAAGTTGTTTGTATGAGGCACAGTGCATCATTTTATAC  
AGAAGGTATTTGTATGGAGCACAGTGCATCATTTTATACAGAAGGTGTTTGTATGAAGCACATTACAT  
CATTTCAAACAGAAGGTGTTTATTATGAAATACTATAAACATAGTAACGTTTATTAATTTGTAATGGGTG  
TAAAAGTAGCTTGTTACAGCCAATTGGTCATTTAGGGATAGATAGTTTGT'TTTGATTAACTATTAGAAAA  
TATGACTGGAGTGACTGACACTTCTCGAGATTTAAACCTTTTTATTTTAAAATATTTTAAAAATCATATC  
TCAAGTGATTTATTACAGCAAAAAATGACTTTATTTCTAACAAAAGAAAATATTTATTTGGCTTCACGGA  
AAAAATAAAAGTTCAATTGAGATAGTTGCACGTGAAAAGAGAAGTATGTGTGGAGCAGGCGGTAACCTCC  
AAGCGTGATTTTTTTTCCGTGTAAGAGAACTTGATTCCATTAATAATCGACTAAGTTACTATTTCTTTG  
TTGCAAGGTGTATAAATGATAGCCAGTGATTACATTTTCTTACTCAGAAGCACTTATCGTCTTCCATG  
TTTCTTTGCAGAAGTTCTATTTTGTTCCAAAGAGAGAGAGAGAACAATTCACTCAAGGAACAATAACAA  
GACTTTTAAACATACACGTGTATACAGTTAGTTTTAATCTCTCCTGAGACGATTCTTCAATCCACACGAAA  
CGCTGTGAATTCTTTGGAATAGAATGTGTGCGCTAACTTCAAATGGAGCTCCCTGTAGTTGAGAGAGTTG  
TGGATATTTAAAAGGGCAAAGACTTTATCCTCCAGACTTGAGCGGGTAGGGGGGATCTGTTAGGTGTTTA  
GTTCTCCTGTTAAAAGAGAAAAAAAACATGTATACTTTATTGGAGTGACTTGTTCAATATATTCGTTGT  
ATGACCTAAAAGATCTGGCCGGCAGAAACCCAGTATGAAGCCTACAACAACACATACAAGTGATTCATA  
GGAAACGGACTCGTCCCCCAAGAACTACTTTGTAAATTTTGCCAAGCAGATTCCTAATCTTTAAAGTGT  
ACAGCGTGAACGAGGTTTCAGTGTAATAACGTAGCGTCTTTCTCTAAGCAGACCTTTCATCTGGGGCCC  
AACAGTACTCAAACTGATTGAAACAGTTAACTACTGATGAAAGCAACGTTCTACCAGAGGAAGGGAGT  
GGGGCACAGCTCTCCAGAGAGAAATTGGACAATAAACACTGGGCATATCATACATCACAAACCGACTGA  
CTCCACCAACAGTAGGGTTTTCTGTGTGAAAGCGAGACCTCTAGAGGTGGTTTTGTGCGATTATGTTGAC  
CGTGTGCTCTCGTCATGCCCTTTTAGCACGAGTTCAATAGAGATCTCGGCGTGCTTTCTCAACTCTCTTA  
TGGGAAAGTGGGTAGACAACATGTTTAACTCGACTGTGCGAAAAGCAAATTTGTTATAACAGCTAACAC  
AGTAGTTAAGCATGCATCTGAATCATTGTAAGCCAGATAAATCAGGTTATGTTTCTATCTAGTATCATA  
AACACGTTTTCTTTATATGAATGTTTTACTTTGCAGTTAGTAACGATCTGACAAACATTATCCCAAAGTTT  
AATAAAGTGTTCCAAAACCTGGTCTGTATCCATACTATTTTTGCTCTCAAACGTTATATCGTTGGGCATAC  
TGAAGAACTTAGTCAAATAATAAAAAAAATGTTGAAATAATGAAAGAACCAAACATTTTCGGAATAT  
ACACATTTTGTACTCTAAATAAAGGTTAAATCAAGTTTTTTAACAGTCTTTTCTTTCCCCGAAAGTGAAT  
CTGCTGTTAATTCATATGAAATAGTTTCATTGCTGTTTTCCCTCGCGGATAAACATATTTAGTTACTAAT  
TCTCCTGCACGTCTCCTATAAAGTCCTATACTTCTCCTCCCTCCGGAAGACAAGAAAGCATCTAAACACGAG  
CAAAGCAGGGACGACTATTTAACGACTTTCCGAGTCACGCTTATTCAACAAATGTTTGAGCGTCAACCT  
CGTTTTGAGGAAGCTTTTTTTACAGTCAAGTAAACAACTCTTGCAATTGAGTTTTCTTTTATGGTCTGTA  
TATATTTATTATCATCTGTAGGTTAACTATCCTCATAGATATCACATATACAATTATAAGTAATTCTG  
TCATATATTTATTGTTGTTTTGTTTGTCTTTTAGAAATTTTGCACAAACCAATACAAAGGATTCTATGCC  
TATAGCCGCCTCACGTTTGTAAGTGAAGACTAGAGGGAAGACAGCTGGCTATCAATACCCACTGCCACT  
CTTAAATTCCTGGCTGAATAATGTGGTTTCAGTCGACCTTCGTATATTACATATACACACCCAAAGTATGG  
AACGCTAATTTTCTAAGAAATCCACGGACCACGGCTCCTCAGCTTCAATGACTAGTAGATAAAACCTGGT  
CCTACTATTAAAGAAGCTATTCTCTTTTTGTTCTTCAGAGTTGTGAGCTCTGAAAACATTCAATGTACT  
AACTGTACTGAAGATTGTTTTACTTTTAGTGGACATCAATTAAGAAAGCGTTTTGTGCGACTGCATTCCAT  
AAATACACAACGTGATCACAAAATAAAATTACACTTAGATGCTGGATATACACTCTTCAAAAAAGAAAC  
GCAAAAGGCAAAATTGAGACACATTTGTGAACATCAATAACTACTTGGCATCTCCTGCCCATGAAAGCG  
ATAAGATGATAAATCACATCCTGTGAAATGGCTGTCCACTCAGCCTGCAAAGCTGTTGTAAGCTGAGGTA  
GAGTTTGCGGTTGAGGTTGTGCGCGTGCAGACGTTGGTCCAACCTCGTCCCAAAGATGTTGATGGAGTT  
TAAATCTGGTGATCTGGAGGGCCAGGGAGGAACGTTGATGTTGTGGTGTCTCAAGAAGACAGTGGTGAGT  
CGGGCTGTGTGAGGGCGGGCGTTGTTCATGTTGAAAAACGTCGTTGACGTTACCATGATGGATTGCACAT

GGGGCCTAAGAATCTCGTCGACGGTTGCGTACGGTCTGATCGGATATCCTACGCAGCCCTGGTATGGTTG  
AGGCAGTATACGTGCAATGGTGATTTTATCCCGAAGGTGACGTAACCGGATATAGCGATCTTGTGCGGG  
CGTGCCACACGAGGTCTGCCAGATCGTGAACGGTCACAAGTTAATCCATGTTGTTGGTGACGATTACAT  
AGCTTTGTGATGGTGCTTGGGTGGACATTACAGCCCTGGCAACATCTGATCGAGATTGCCCCGCTTCCA  
AGCGACCAATGGCGTTGTTGCGCCAGTCAGTCTTGGCGTAACTGCATTGCGTGTGGTGGCTTAACACTG  
AGCTATGAAAACCGACAATTCTGTCATTATTATACGGATTTTGCACATGTTGCACCTGCAGAACATGCAGA  
TCTCTCAAAACAAATTTATTGGACTCGAATGCGTTTTGGTGAAAAATCCGTTGTTTTCTCCGTTTTCAAA  
GTGCACAACGTTTATTGTCATTTCTGGTCTGACAATCAGTCCCTAAACACGTGTAACATCACCTACTCTGA  
GCTTGTAACGTTATTACATATATTTCTCTTTAAAAATAACAAAAATATCCCTTTTGTGTTTTTTTTTTAAG  
AGTATATTTGTTTTATATTAATAATTTAGCACACATATATCTTCAGAACTAATCAACTGTTTTCCATTA  
TATCCTTAGAAAAATGCAAGGCCCTTTTGTGAGCGATTGAATAACTTTTCGTTTATTTACCCTTCCCTGTT  
TTATACCCTGGCATCTCGTATTCTTTTTCTGTTTTGAAACCAGCGACAAGTCCGAGCTGTTTATATTTAGT  
GTTACGAAGTTGAACGCTTATCTTAAACCTTTAAACAATGGTTACATCAGCCAGAGTAGACCCGGCATGG  
CCAGGTGGGTAAAGGCGTTTGAATCTGAGGGTCACGGGTTGCAATCACCGTCGCACCAAACATT  
CTCCCCTTTTAGCTGTGGGGGCGTTATAATGGTACGGTCAATCACTATGCGTTGGTGAAAGAGGAGTTAG  
CGGTGTGTGGTGATGACTATCTGCCTTTACTCTAGTCTTACACTGCTAAATTAGGGATGGCTAGCTTTCG  
GCAAAATTTAAACAAATAAAACCTTATACGTAATTGTGAAAAACAAAAAGGCCATAAAAACTGCAAAATC  
GGAAACCGGAAACCAAAATTTGCATGAACCCAACAAGCCTTCATGCCAAATTTGGTGGAGGTTTATCA  
ACAGTGAACGAAGTAATAATAAAAAAGAATTCCAAAACGCCCATGAACTCAACAAAACCTCATAACTGAAAA  
TTTATATGTATCTCCCTATGAATCCATTGAATCAGCAAACCAAATTTAGTGAAGATTTGTCTTGCGAAG  
TTATTACACGGACCGACAGGTCTACCATATACATACACATATATGTATCAACTGTATATGCGCACATTTT  
CATGTAACAATTTTGAATTAATGCAGTGCAGCGTTTACAAGCTATCATGTTTTTCTTATTATTTCGAAT  
TTCTAGCCACAGTAATATCTTATTTATTTGCCTACAAGTAATTTATTCTAAAACCTACGTGTTTCGATTTTA  
TTCGCCAACGTTTTAATTTCTACAGATATTATTAACCTCCTCAGAAAATCTTTGGTAACTGCAGGTTCCCG  
GGTCATTGTTACCATTGAAAAATAGGTACTACGTTTTCTTTAAGTAACGTTTATGTGGTAATTATGATTTT  
CTTATTTATCTAGATACACTACATGGCTAAAAGTATGTGGACACCTGACCATCACACCCGTATGTGCTTC  
TTGAACATCTCATTTCCCAAACCATGGGCATTACTATGGAGTTGGTCAAGGCTCTGTGCAGGCCAGTCAAA  
TTTTTCTTCACCAGCCTCAGCAAAACCATGTCTTTATGGATCTCGCTTTATGTATGCTGAAACACAAAAA  
CGGCATTCCCCAACTGTTGCCACAAAGTTGGAAGCACATAATTCTCTAGAATGCTATTGTATGCTGTAG  
CATTAAAGATTTCTCTTCACCGGAACTAAAGATTCCAGTCCAAACCATGGTAAACAGCCCCAGACCATTAT  
TTCTCCTCTACAAAACCTTTACAGTTGGCACTATGCATTACAGGCAGGTAGCATTCTCCTGGCATCAGTCAA  
ACCCAGATTTCGTCCGTGAGATTGCCAGATTGTGAAGCGTGATTATCACTCCAGAGAACGGGTTTTCACT  
GCTCCAGAGTCCAATGGCGGTGTGCTTTACAACACTCCAGCCCATGCTTGGCACTGCACGCAGTAATCTT  
CGGTGTGTGCAGCTGCTCGGCCATGGAAACTCATTTATGAAGTTTCTGACGAACAGTTCTTGTACTGAA  
GTTGCTAGGCAGTGGTGAGTGTGCAACTGTGGGCATGTGATTTATACACGCTTCACGATTACAGCACTCG  
GAGGTCCCGTTTTGTGAGCTTGTGTGGCCTACCGCTTCATGGTTGAGCTGTTGTTGCTCCTAGACGTTTC  
CACTTCACGATAACAGTACCTACAATTGACCGGGGCGAGCTCTTGCAGGGCAGAAATTTGACGAACTGACT  
TGTTGGTAAAAATGGCATCCAATGACAGTGCCACGTTCAAAGTCACTGAGCTCTTCAATACGACCCATTCT  
ACTGTTAATGTTTGTGCGACGGAGATTACATGGCTGTATGTTTGAGTTTATGCACCTGTTAGCAGTGGGTG  
TGGCTGAAATAGCCGAACCCACTAATTAGAAGAAATGTTACATTCTTTTGGCCACTTTGTATATAACCA  
CTATTTATTATTCTTAAACGACCTCGTTTACATGAAGCCTGTTGTGGACTGATTGTTATGATACTAGTT  
CAACATATTAATAAACACGCTCATCCTTTAGTCGTGGCGGCGTTACAATGTGATGCTTAAGCCTACTTT  
TCGTTGGTAAAGAGATAGCCCAAATATTGGTGGTTAGTGGAGTTGACTAGTTGCATTCCCTCTTGTGTAT  
CGCTTCAAAATTAAGGATGGTTACCGCAAATAGCCTAGAATAACTTATTGCGAAATCAACCACAACAAAA  
AACAAACGTAATCAAATGGTTAATTACGCATGCTCAAATCATAATATCGAATTTGGATGACTTGAATA  
TTTGCTTCATGTGATTATGGGAGTTACAGAGTTGTTAAAACGACGTTGTTTCTCTGTGCGAGTTGAATATT  
TTAGCTAAAGTTTCAAAGTTTTCTCTATTTCTGTTATCTTATTGTAAATTTCAACAGGGTTAAGGCATCT  
CGAAAATTTCAACTTGATGTTTTAGCCACGTTTTTGGATTTTTGACACAGCTCCTTAAGGAACACCTTT  
GTGAACTATAAAAAATTAATGTTTGTGTTGTTTGTGTTTGGAAATTCGCACAAAGCTACTCGAGGGCTATCTG

TGCTAGCCGTCCTTAATTTAGCAGTGTAAGACTAGAGGGAAGGCAGCTAGTCATCACCACCCACCGCCAA  
CTATTGGGCTACTCTTTTAGCAACGAATAGTGGGATTGGCCGTCACATTATACACCCCCACGGCTGGGAG  
GGCGAGCATGTTTTAGCGCGACGCGGGCGAAAAATTAATGTAATTCAACATAAAACTCAGAAATTTGGTAC  
TGTCTGTCCACTTACTTTATTTTAGAAGGTAAGTTGGATTTCTAGTTAGCTTGGGTACAAAGTAATTTT  
TCTGGACTTTTCATCAAATAGTCTCACATAGTACACTGACGTTTGTCACTTTTGTGAAAATTATACTAATG  
TGAAGAATTTGTTCAATTATACATATATTTTAAAATTAAAGTGACAGTCCACGTTCCATGGCCAGATGATT  
AAGGCACCTCGACTCGTAATCTGAGGGTTGCAGGTTGCAATCATCGTCGCACCAAACATGCTCGCCCTTTA  
AGCCGTGTGGGCATTATAATGTACTGGTCAATCCCACTATACGTTGGTTAAAGAGTAGCCCAAGAGCTGG  
CGGTGGGTGTTGATGACTAGCTGCCTTTTCTCTTGATTACACTGCTAAATTAGGGACGGCTAGCGCAGA  
TAGCCCTCGTGTAGCTTTGCGCGAAATTCAAATTAACCAAACGCATTATACTGTTATATTTGACGGCCG  
TACATCTTGACAGTTGTCTGCAGCATACTTTCCGTTGCAGAAAACCTCGTCATAAAGCTTTTCATATCAA  
AAGTACAACGCTGCTCCATGTGTGCTTTCTATAAGTTAAAGATTACAAGGACAATGGTTAGTGGTGTG  
AAACAAAAGCGTGAATATCTAGTTTATTCCTCAGCTTCTTAGTGCCACACTTTATTTTTTTTACTTAGATT  
GAGGCACGACTTATTGAACTTCTCTTTCTGGGTACTTCTGGTTTCCCAAAGTACATATTTCTTTATT  
TCCAGTGCCATTAAGTACAAAATATAACCCCTTTTTTGAAAACCTCTAAATCCTCGATTTTCGACACAGCTTT  
ACGTTGCGAATGTATAAAATAAATATGTGGCTTTGTAAAAAGCTATCTCATTTTTTTTTTTTACAGACCGAT  
TGGTTTTTCACTGGCATCAGTTTCTCACGAAATGCTAAGCAAACACAAAATGTAGTTCTGATACATTCCGT  
TGCACCGCAACTTCATATTGACTTTGATTGATAGGCAACTTGGTGATTGTCATACTCAAAATCGTTTTGA  
TATAATCACTCAAGCATCCGTATAAAATCCGAAACTAAGTTATTAATAGCTGTAAACTGAATCTAGCAAA  
ACGTAGAATATCTAAGACTGTAAATGAAATATCAGTTATGTAGGGAACATTTTAAAACCTTTTACAGCTAT  
CTTCAATTAATCGAGTTTACGAAACCTGGCGGGCTCAAAAAGAACAAACAGTGCATGCACAAGCACAAGA  
TGCTGTCTATGATAAGCTACGTATACTCAATGGTCAGGGATGGCCTCGCCCAAACCCCTGGTATCCTGGT  
AGTGCAACATTTGGTGAATAACCCCTGCTTGCGTCCCTCCTCCAGTGACTGCTCCCAGTCTCCCTACCG  
AAAATGGACAAATTCAGAAAAAAGGTAAGAAATAATTTTCATATATCTTCCAAGATCATATAAGTGTATAT  
GATACTAAGTAATTTTTTTTCCCGTTCATGAGTATATTTTGGGGGAAAAGATTCAATAAAAAATGTGTGTA  
TTTTGTTCGAGTATCATCAAATAACTTCGTGATAGTAAATTGAAAGTATTAATTTGCACGAACTGACC  
AATGCATGAACTGACCAAAGCTAGAATATATGTGTTAAGAATCATGTGTTTAGCATTTAAAACGTGAATT  
GGATCTCACGTGACACACCCAGGTGAGGTATTCCAAGGCTAAAAGTATATCTAACCCCTAATTTTTAAACT  
AGAATGAGAATCAGCAACCATTGCCTGTTTCATGTACTTTTAACCGAACAATTCAAAACGTGTTTGTGTTC  
AACGGCTTATTACGAGCTTAAACCTTGATATTTTTGATTGCTGGTAACGCACGTTAATACTGGACCACGC  
CCAGCTCATTGAAGTCAAATGAACTATATAGTGACAATAGCGTGTAATTATTTAGAATTATTTTCGCCT  
GTAAACACGCACATATATTGAGCACAAAATTCGAAAATTTTCGGGCATAAGATTTCAAAATAAGTTCCTAC  
GTAATGAGCACGCACTATATGTTTCATGCATACCTTGTATAGACGTGCATACGCTCGACAGATACATGACT  
AAAAGTTTTGTTTTTTTAAAGGTTTCGTTAGTATCATTGTAGAAAACATGGCGTTTCAACACAATACGTTT  
TTGTCTCTACTTCAACAACACCGACAAAACAAAATAAATGTCTTAGAATAATCAGTGTCAATTGCTAGC  
CCGAACAAAACCTTCTGTTTGGGGATCTAACGAATATAAAAAGTCACTTAGTGAAGAGTTGTTTCAGAAG  
CCTCACTTTGATTGTAATGCTCTGCGCATTACCTAAATAAACACTGTGTATGTCATCTGCTTTGGCAGTA  
AGGGATTACGTGCTCTTATTGTTCTAACTGTCTTCGGCATCTCGAAAGGTAATGTTTGCCTAAAAGCATC  
TACACACTTATGCATATGCATGTGCGAATAATACGTTATCTGTGCATAGAACAAATACAAGTCAACATA  
GCATGTTTTTTTTTCATTATATTATCCATGACAATTGTGTAGTGATACTTTTGTGTGCTGTGATGTGCTACGTT  
AATAGTTTTGTTTATCTTGTCTCAAGCTAATTCATTCTCGTGTGATTAATTCATTATGAATACTTTTTTA  
TTCCACTTGAATAGGCTTTAACTGATTCTATAACTTCTTATCAAAGATACTACTCGTGTGCGAAGTTGC  
AAATAGCCTTCAACATGTTTTATAACAGCGTTTTCAACATTTGCAAATATATGTTAACAGATTATTTAAT  
AACAAATAGGTGATGCAAAAGTTTTTATGCCGCCAAGGCCAGGTGGTGTAAAGCTTGGTATACGAGGAAT  
ACCGAAAAACAAAAAAAATTAACAATCTATTTAGCCATTAGTTGTGTATAATTACGTACTACGTCGGATA  
GTGGTGAAGATAGTAGGTCTGTTCCAGTGTGTTTTGTTTCATACACGTTTGCAGGATTGCATTTAAAAATAT  
TTTTACTTTCATTATTTTGTGGTCTCTGACACTTTTCGTTCAATTTACTCATGCTGACATTAAGTTCTCATT  
TTATAATTACTAACCTATCTCTAATATTATAATATGTGTTTGTATGAGGAGTTAGGCTTTCTCCACCAAA  
AATGAAGCAGTTTTTTATCTTTGTCTAGTTAAATTACTTTTTTACAAGTAAACTAACAAACGTGTATAAATC

AACCGCACGCTTTAAGGGTTAAGTGTAGGTCAATTAAACAATTCTTTTTTTATTTTCTAAAAATGAAAAATA  
TATAATGATATATACATATGTTTCTAATGTTTCATTTAAGTGTAGGTAATGCCTCTTATAAATGTCTTGCA  
TACATATTTGTTTGTAGGCTTAACAAATTTAAATGAAACAGTGAACAGACGATAATTC AATTTGGGTGTA  
CCCTAGGGCAAAGATAGTGGTTGTTACTGTCTTCTAGGGTTTATTTTATTGTAGTTTTATATTCATGATC  
AGGATTATCTACTATCGTCCCTAAATTTAAACTACTAGCTTTAGGAAAGGCATGCATACCAACAGACAAT  
CGACGCTAATGGATTAATTATCACTTTTATAGTGCCTGATATCTTAAAGTGTGGGGAAAAATTTTGTGAT  
ACAGTCATGATTTCGAATCCCGCTCATCTGCTCCAAAATCAGAGATCTCCCGCGTGACCAATACGCGCTCT  
CACATCTTATTTTAAATTGTTTACTCCAGTATTCCGGACAAAATACCACTTTAATTCATATATTCAAATTA  
ACATATATTTTCGCTATTTTACTTTTTATTTTACAAAAATAGCTGTGGGATAATATTTTGAATAGATCCTCG  
CACGTGCTTGTCTTTTTTTTTTTTGTGTCAGTGTGATATCACACTTGAGTTCCCCAGTGGCACAGCGGCATGTC  
TGCGGGCTTGTAGTCATAACAAAAGCTTACTTTGCCAGTATGTTACCAATAGAAAACAAAACAATAAGTTA  
ATGATGAGTTGGGGTTAGTATTTAGCAGTAAACTGTTACTGCATCAGCAGGTGGTGTGTTTTTGGGTGT  
AATGAAATATAAATCATTC AATGTGATTGTTAAACGTTTTCACACTCGCGAACACTCTATACTACTACA  
ACAATTAAGAGAAAATTTTCAATAAAAACCTGTATTTTTTAAAGCTAATTACTAAAAAACTTGTATTAA  
GCTAGTAACTAAAAAAAACACTTGTATTTGTAAAGCTAGTAACTGAAAAAACTTGTATTTGTAAAGC  
TGGTAACTAAAAAAGTAATGTTTGGCACCTCTCGCAAGATCTTGTGGCGGAAGTATTAGATAATATGG  
CAAATGTAGCTGAAAGTCTGATAAAGAATGGTTATCAAGAAATGTATACATGTAATGCATTTACCCCTGG  
ATATCACCTGAAAAAGTCTTCTTCAGTGAAGACTCTGGATTGATCCAAGTGGAAAACAGATAACCACTGA  
CCGATTACTGTTAACGAGACCGTAAACTGTATATATATATAAATTTACTGCCATAAAAAGAACTTCTTAC  
TATATATGTTCTACCAATTATACGATATCATTGTTCCATATTTAGCAGTTGCTTCAATCCACAGTAAAAAG  
TTTTTCGTATCATTAGCCCCCTCTTTTTTTCAGTATTTTTTTTGGTACTTACCACACACACAGAAATGTCATA  
GAAATGATTCCAGAAGTACACGATTGATGCACACAAGGGAATCACAAAGAATAAGCGATGGCATATTTAT  
TGATTATACAAAACGTTTTCACAGAAAATACCAAACAAAAATGATTACTTTAAGCATTGCTAATTTGCA  
TGCGATCCTTTTCATGTAAAAGCACATTGCATCTCGTTTTTAAATGTCTTCATACAGATTATCGGTATGCAT  
TGTGGAATACTATGCCAAATGGTCTGTATTACAAGTTGAACCTTCTTCAACACGACATGTTCTTAAAGGA  
ATAATGTGGAGCAAAATCTGCCTGCACTTTTTCAGCGGTGAGAGTGCAGATAAATCATGTGTGGATTGTGTA  
CTGAGACGTATTCTCAAACTCATACTGTTCCCCACTGTAAATGTGACTGACTGCAATACTGACCCCATTC  
TCTGTCATCAAATAAACTGTTGTTGGTAGATGATAAACAGTTAGGACTTAACTGACCCCATTCCTCGGTCA  
TCAAATAAACTGTTATTGGTAGATGATAAACAGTTAGGACTTAACTGACCCCATTCGTCCGTCATCAAATAAACTGTT  
AACTGTTATTGGTAGATGATAAACAGTTAGGACTTAACTGACCCCATTCGTCCGTCATCAAATAAACTGTT  
GTTGGTAGATGATAAACAGTTAGGACTTAACTGACCCCATTCGTCCGTCATCAGATAAACTGTTATTGATA  
GATGATAAACAGTTAGGACTTAACTGACCCCATTCGTCCGTCATCAAATAAACTGTTATTGATAGATGATA  
AACAGTTAGAACTTAACTGACCCCATTCCTCCGTCATCAAATAAATTTGTTGTTGGTAGATGATAAACAAAT  
AGGACTTAAATGTGTCTGTAAATAACACACGATTACTCATTTCACTATTTGTGATCAGCTATCTTCAGTT  
GGATTTAAATGATACACTTCAAATCTTTGTTGATAAATGCTGAAAATATATAACTAGTGTACTATGTGT  
CACGGGAAAAAAAACAATTCATTGGTATAATTTGCCAATAAATAACTGATAAAAAAGGAATCTTCTTACA  
GTTGAAGGCGTCTTCAATCACAGATTGGTAGTGACAAAATCCAATACTGTACCACAACAAGTTAGTATGG  
ATCTACTCAATGCCTGAACTAACCTGTAGATTAGTAATGAAAAGGCACGTGCTATAATACCTTAGCAAAT  
GGTAGCTGTTACTACCCAGAGAGTTAGATGAATAATGGTGATATATGATGACATTCGTCTCTGCTCCGTCA  
TCCCTGTTTGCTGAAGCTCCTGTCAATTCTCTTTTCTAACGGAATGGACCTGATTGTATCGGATGACACAG  
GAGCACCATTGAAGAAAATTACAACCTGTTGTATCATACTTTACAGTGGTGTAAAGTTGTCAGCGTTGGA  
AACGAAATATATACGAACTATTAACCTTAGCAACTGCATTTGTTGCAGCATATTATAAGAAGAAAGACAC  
GAGTTGTATGTCTGATATTTGATATGCAATATGTTTGCCAAACATTAACGTCAGTAAAATGTTTAAAAAA  
ACTTAAAACTTACATTTAGAAATCTGTCCAACCTTTGACTCACAGTTTTTGCCTAGGAAAAGATACAAAT  
CGTATGTCTGTGTTGCGCATCACGATGTCATTAGCAATGCTGTTGTCTTCAAGTGATTCCATCTGAGAA  
ACCTCGTTTGTATCAGAAAAATATGGGTGGTAAATAGCTCAGTTAACTTGCAAACCTTCTGTGATTGTAAC  
GTGACAAGTGATTTCAGAACTGGTGGGTAAAAACGACACTAAGCCAAGTGATAATCATTTTCAAGCAATTG  
CCTCGAAGAAAACATAATGATACAACTGATGTGTGTACCAGCTGGTCAACTCACAGATCCACTGTTCTACT  
GATACACTGAAAACCTGACGTGAGTACCAGCTGGTCAACTCACAGATCTACAGTTCCACTGATACACTGAA

AACTGACGTGAGTACCAGCTGGTCAACTCACAGATCTACAGTTCCACTGATACACTGAAAAC TGACGTGTGTACCAGCTGG  
GTACCAC TTGGTCAACTCACAGATCTACAGTTCTACTGATACACTGAAAAC TGACGTGTGTACCAGCTGG  
TCAACTTACAGATCAACGGTTCTACTGATACACTGAAAAC TGACGTGTGTACCACCTGGTCAACTCACAG  
ATCAACAGTTCTACTGATACACTGAAAAC TGACGTGTGTACCAGCTGGTCAACTCACAGATCAACAGTTC  
TACTGATACACTGAAAAC TGACGTGTGTACCACCTGGTCAACTCACAGATCTACAGTTCTACTGATACAC  
TGAAAAC TGACGTGCGTACCTTCTGGTCCACTCACAGATCTCCAGTTCTACTGATATACTGAATAATTTA  
ATCGTTTCAGTCCAATGCATATCTGT CATCAGTGGTCTTTTCATCAGCCTTTTCATTTATAAAAGTCCCTAG  
ACACTGCATTTTAATTACCAGTAATGGAGAATTATCGTTTTGGATGACTACTGGTCGTCTTAGAGTGGTT  
AAAAAATTCACGAATACTGATTATTCTAGGGGTATCTCTATAAATACTATCATGTAGTAATTTCTACTTG  
TTTTATAACTATCTTATTACACACAATAAAACAAAACCAAACACCAGAATCAGTATTTTCAGTTTA  
CCAAAAGAAATGATTTGTTTCATT CATGTATTCTTTTGCTTTTTGTTTTAAGTATGAATGGTAGATTTTA  
AACAGTAATGATCCTATAAGTAAGAGAAGGTAAGCAACGATTGTCTTATCCACAGACATAGTTAGTCA  
TAGGTTTAGAAACAGCACATTAGTCAATACGTGAGCTATATTTGATTGAATTCATGTTGCAGCTGCCATC  
TTGAATATTTTAATTCCTCGAGGGTGCCGAGATGGCACCCTCACATACTCAGAGCTATAAAAAAACCA  
CCAAAACAACAATAACAACATAGAATAATTATGTTTTTGAAAGTTTTCTTCAATGAAAGTGAAATA  
TACCCAAAAATTTGGAATGATTCTGAGCATTATATGGATGTAATAAACTTTCTACATTTTTGTATAAAA  
TAACGCCCTATCCCCCCCCCGGCACAGCGGTACGTCTGCGACTTATAACACTAGAAACCTGGTTTTGATA  
CTTGTGGTCGCGCAGAGCACAAACAGCCAATTGTGCTTAACCTCAAACAAACCTGTAAGGTAACCTTGACT  
TCCTGAAGCGTCCCTGGTGGGTGAGCAGCAAGCTTGTGGTCTCAAACGCTACACTTCTGTGTTTTAAAA  
TATATATGTGAAAACGGCTCGTTTGGGTTGAGAAATTTTTTTAAGTAGAGGACCAAACGAGCCGTTTTTA  
CATATATATTTTTGTATAAAAAATGGTTTTCTCGACATCACTGATACCTGTGTTCTTTTGAAACAGCTCA  
GATAGCTCATTGTTTGGTTTTGTGTTGAACAATAAACAACACACATCTTGAAGAAGAGGAATAC  
CATATAAGGTTAAACACAAGGAAACACTTTAAACCAACATGTCTCAAATACAATAACTCTTACACCATA  
TGCATACGAATTTGAGAATTCTGGGTTGTTTTCACTATCGGTAATAAAAGGCTTAGATTTATTCATTTTA  
GCAATAGCCATTTCAATGAAATTACGTTGACTTTGTAATATATGTGAAATCCACACAAACACCTTCATAC  
AAGAAATGCATCTGTCTCTTGCAATTATCTATTTTTCTATACTTTTGAACCTACACATTTTTGTTTGAATGT  
ATATCGTAAATGTACATAATAAGTTGTGAGGCTATGTGTGAATGCAATTTTTTTTCAGAGTTAAGCGCT  
ATACATGTTATTTGTAGTTTGGTATCATAAATACACATCGTGAATTGTTTTTTGCTAGATTAATTAATAC  
ACTGAAATAATTAAAAACAGAGAGTTATTGTACTATATATATTACCCAATATTATTCACTTATTTATATAA  
ACGCATGATAACATATATATACATAGAGTCAGTGTGTTGTTTTGAACTACACGCAAAGCTACGCAAGGACT  
TTCTCTGTTAGCCTTCTTTTTTTGAGCAGAGTTAGACGAGAAGAAAGGCAGCTAGTCATCATCAGCCGCC  
GCCAACTCTTGGGGTACTCTTTCAGCAACAAATATTAATTCTCATATTATAACGCCACCCACAAC TGAA  
TGGCGAACATGTTGATGTAAACGGGGATTGCAACCCTCAACTCTTAACTGCGAGTCGAGCGCCCTAATC  
ACCTGACTATGCCGCTGTCAGTGTGAGCGAGCTTTACATCACGGTTTTTCAGTCAAGACGTTGAATTCAT  
TACTAGTTTTTAAATACAATCTTTTTCTTAAAGTTAAATTTCTTTACCGCAAAGAGAGTTGAGTGGTTTA  
TAATGAAACAGTTTTGAATAAGTAAATAGTAAGTCATAGCCAATATAAAGCAGTAGTGGAACAGGTTGT  
ATCAGAAGTATATTTTTTGACACATTTTGTGGCACGTAGTGTGACGCGACTGAAAATCGATCACTTTTAA  
AAAGAGTATGTAAATATTCACACACTCAGATCATGAAAATGTGTTTCAGTTTCCGGAATTATAATTTTTGA  
AATTAATAATATCCTTTATTCTTATTGGCATTGGAACCAAACAGATACGAACTAATTTGCGACTCCAAAG  
ACATATACAAAAATATCTGCAACAGATCGTATCTCCGTGCTGATATAGGCAAAGACTCCATGAACACAGA  
TGTCAGCCGTCCACGTACTCTAAGCAACAATACGCAACATAATCAAGAAGGATTTAGTCTGTAACAGCGA  
CACACGTCACGCGTATACAAGAGCTTTTCATTACATATATCTTCAACAGTTCTATTTCTCAAACAACTGG  
AGAATCAGTCGGATATTCCCGACATTCTGTAAGAAAACAAATCCATCAAGTCGCCAAACAGAGCGTCTAT  
TGATTTGTGTGCAAAATAAACTGTTTAAAAAAGTGTTGCAAAACCGTACCCTTGTATACTAGATAGGTTA  
TGGAAGGAAGCAAGAAGTAATAGTGTGCTTTGGACATGACAACCTTACGTTGATGTCTTTTGCATGGA  
AACTACTTTGCAGAGCTATTGTAAAGATGTGAGTTAGAGCATGAACAGATACAGCGACGTAAAAATATAAC  
GACGTGGCGAGATTATAAGATAGTTTTAATATAAAGTATATGCTCAACATACATATAAATATACTGCTGC  
ACTTTATATTTGTTTATGGATTTTCCATTCCCTTCTTTCAACAATGAGGTTTTTGGGTAATTTCTCTATTA  
AAAAATAATTTGAAAACGTTAAAGTGATCTATAAATTCGCCACATTTTCAGTAATTTATTGTGAAATAT



GTGTCTCTAAAGAGTATATACCAGAATTGTAAACATTTGAGTGCATGGCCATTTGCGTGCGTGTGTGAA  
AGTGTATATTGAAAGGAATTAATTAAGGTTTAAATTACTATTGACAAAATCAAGGGTTTACACAAAGGGT  
TTTCAACTGTTAAAGAAACAATTTGTAAAGCACATAGAAAACTTTAGTTTCACGAAATAAATCTTTATTTT  
TTGGTTTAAAGCATCTTATTACAGGAAAATCTGAACTGATAGTTAAAACTGTGAAACCGTATTGTTTGATA  
ATACAAATTATTTATTTATAGATCAACTTTTAGTGGAATTTCTGTTTATTTGTTTTTTAATTTTCGCGCA  
AAGCTACACGAGGGCTATCTGCACTAGCCGTCCCTAATTTAGCTGTGTAAGACTAGCGGGAAGACAGCTA  
GTCATCACCACCCCAACGCCAACTCTTGGGCTACTCTTTTCCCCACGAATACTGGGATTGATCGTCACATT  
ATAACGTACCCACGGCTGAAAATGGGAGCATGTTTGGTGCACGCGGATTTCGAACCCGCGACCGTTGGAT  
TACAAGTTGAGTGCTTTAATTCACCCGGCCATGCCGGGAAGTTGACTTCTAGTAGAAAATTAATTACCT  
CTGAAGCAGAAGTAAGTTGGCTCAGCAGTTAATTATGTTCTAAATTAATAAGTTTGTTTTCAAATTAGC  
AAGGAAATTTAGCTGAGTTTCCATTGGATATCATAATAATTAGTTCACTAGCAGTATTTTAATTGATTTGA  
CAGTAAATTAATTTGGTTTTCCAGAGAAAATAGATTAGTAGTTACATTGGTAGTGAAATATTAGGCATTT  
GGTAGTAGAAATGAGACAGCTTGTGTGTACAAATCTCCAAAGTAATCCTGGTAGCATAATAGATTCAATA  
CTAAACAAATAGAAAAAAAAAATTAACCTAGTGTGATCTTAAACTGGATCACCGAGTTGACAAATAGTGAC  
AATAAAACAATGTTTTCATTTGTTGATTGTTTCTACTGTACTTCGTTGATTTGCTACATAAAATAATATGT  
ATAAATGTGTGCAAAATCCATAGTACATTTGTTTTAACTTTGTAATTTCCAATATATTTTTCAAATAAT  
CTACTGTGGACATATTTCTGTTTAAAGTTTCAAAGAATCTTTTACTTTATTCAATTGTTTGCACACATCT  
GTGTTAAGTTGAGATATGATAAGCCCTAAAAGGAACACTGAGCACACCTGTGTTCCGGTCCAGACCCCT  
AGGGGTGCAGTAATATCAAGATGACAGTGTCACTCTCTTCCCACCATATTCAGCGCGGACTTTGCCCTTC  
CATCACGCTCCGTCACTCCAGATATGTACAGTGGCTCAACTAGATAAGCCTAGTTCATATAGACTATGG  
AATAGATGGGAGTCTTTGGGTGGGCTTCAAACCGTGTCTTGAGATGCTCCACGTCAAGTCAATAAGTGACA  
TCTCCCAGACCGCTTGACGGAAGCCTGTACAGGTGGCCACAATAGGGCAATTTGATTATTTTACCTCTG  
AATTGCCTGAAGCACTCTCATAGGTGGAACCATAGACGTACAAAATCTGGTTTCTAACAACATTTTTTTT  
TTCAGAAATTAGTTCATATTATCTGGTATCTAGCAATGACGGATAGGAGAGCCATCAGAGAGAGAGTGG  
ATAAGACATCGTTTCTGACAAGAAGTTTGTGCTAGCTATACAGACCGCTCGGTATGTGGTGGTCGTAA  
CTGTAGTGAATACATATTTATAGTATTTCCACATCGCTGGTTTGCACAAAACAAGTTTTCGATTTTCATCGC  
AATTTTAACTTCATCAAAAAGAAGAGTCAGTCCTGACAAACATGCGGTTTCACTGTAAAATTAACATCCA  
CGGTAAAAGTAGGTGCTCAAAATAACGAAAATTGTAATATTTATTGCAAATGAGCAAATCATTTTGATTAT  
AATTAATAAAGTCTGACCAAACCTTATTTTTGTTTCTTTGTTCTTTTTCGTGATGGCTGATGAAAAGGAGCA  
ATGCCACGTTTTCTGGAAGCCCATTTGAAATTGATGACGTATTACAGAAGAGAAAGACGCGAAAGGATGCG  
TTTTTCAATATTGTACATTTTATAGATGTTTTACAGCAAATTATTCAAAGAAATTCAAATTCAAATTGA  
TTTCCTGGTGGGATAGCGGTAAATCTTCGGATTTACACGCTAAAATCAGAGGTTTCGATTTCCCTCGATGG  
ACACTGTTGATAGTCCAATGTGTGTTTACACACACATTCAACTCACTCAGATTACACTTCCAAAAGTGTA  
AAGAATGCACATGTTTATGTGAGGAGATATTAAGACTCTTTCTAAATCGACAAATTATAAACCGTTTTTC  
TTTAATTTGGTGTACCGGCAGATCACATCTTCAATTATTTTCATTGTATATGTTGTGCGATCTTTAGAAC  
AATTGTAACAATGCTTAAAGCAGTTTGTCTCTGAATCTGAAGATATATACCGCTCAAATTATAAAACT  
CGAGCATAATATTCAATAAGCTAAAAGCTAAATAAAAACTTCACCAACATTATGTATAAGTAATACTGAT  
AGAATATTTATGATGTTTTACCATTAAGGTTATATGGCTGGAATTTTATAATGGTTTGATTTTTATCTCA  
TAACTTTATTAACCTGTTTATTTTTTAAATATCTGTTGTCGATAGATAATATTCTGCATGTTTTCAGGT  
ATATATCCCAATTTTCTTTTCTTTATTTTATTTTTGTTATACAGAGTAAGGTTTCTTTGGTTGTTGAGCAT  
TTGTACAAGTTATCAAAACAGTTCGGCTTATTTAATTATTACATTTGTTAGCTTGATTAATCAGCTTGAT  
TTTCAATTTACTGTCCTTTAGTCGGATAGTATGTCGCAGGCACTTGTCACGTTTTTAACTCTTCATTAA  
TGACGGCCATTTATATAGAATCCAGTTTAGAAAAGTTCAACTGAGTTAGGTTACATTATGACTGTCTTTG  
GAATAACAGCGTTTTTGCTCTCTAGTTATCAGATTAAAAAAGTTCTGAATGCGATCTCACCCTAATATT  
ACTTCTGTATTTTCAGCCATCTCCTTCAGAGAAATATATTTGTACACATGTCAGTCAGACCGTTCCAAAA  
ATGGTTAAACAAGCGGGTCGGAATATAAACTGAGAAGGCATATAAAATTCAGATCTTGTCTTAGAGCAAA  
TAAATTTTGTCTCAAACCATAGGGAGCGTCGTGCGCTTAGTACTTGATATGTTGGACCTACTACCCTAT  
CCTCTCTCTTCGTTGATTAATCTCCTCCAACAGAAAGTAAGGAGGCGGAGCACAGTATGACGTAATTTAG  
ACACACCTACTCCTGTGAATTATGACATTGTGCTTCAGAGACGTATTGGAATAACATTTTGTATGAGATA

TAAGAAACATCGACCAGTATTTTTAAAACTCTGTTATTATGGTTCATTAAC TAGTTCTTTTCCATTTTATG  
GATGTTCTTTGTAGAACTAGAACTCTTATGAACAGTTTTTAACTGAAC TTGTGCAAAATACACGAATT  
TCGGTAATACTTTTATGTGCTGCCATCTACTGATTTATTAATAAACCATCGTCAGTGGAGGAAATACGTA  
TATTTCCCACTTTTGATTTGGCTAAATTATGTTAGTGTATGTGTTCTGCATTAATAATCTTGTTTATTAC  
TAAAAGTAAAATATAAATCTCAACTATTTATTAGCATTATAGTGTGTTAAAATTTTTCTACAGGTAGATT  
CAATACGAAATTACTTTGTTAGCTAAGCTAACTTAAAAGTATTTTATTATTTTGGTGGCGTTTTTCTTC  
GTTCTTGTTGTTTCCACATTATACCTAACTTTTACCACGACTTCGAACCCGTAATTATTCAGATAAGAGT  
AAACATTTCCGCAATTACTCGCGAAAGATGTTTGTTGTTTCGCATTGATAAAATTGTTAAAATATTGTGTG  
TATAATATATACATATTGAACTAAAATGCATTAATATACTTAAAAATACATATGGCCCTACAGGCCTGG  
TGGTTAAGGCACTCGACTCATAATCTAAGGGTTGCGGGTTTCAATCCCCATCACACCAAACAGTTCTCC  
CTTTTCAGCCATGGGGCGTTTATAATGTTTCGATCAATCCCCTATTTCGCCGTTAAAAGAGTAGCTCAAAAG  
TTGGTGGTGAGTGGTGATGACTAGCTATCTTTCTTCTAGCATTACACTGCTAAATTAGGGACGGCTAACT  
CATAAGTCCCTTTGTGTAGCTTTGCGCGAAATTCAAAAACAAACAAACAAGTACCTATTTTCTTTTCTCC  
ATATTAATTAATCAAAATTTACACTTACAGTAACTTTACATTTTGCCTTTATTTCCATATAAAAAACGGTTT  
CGTATAAAATGGAAAATGGAATATATATTGTGTATACTCTCAATGTTTATTTGGCACGATGTATTTTAGG  
CTAAATCGAGAAAAGAAAGTTTTGAGGTAGCCAAACCCCTTTCCCCCAGACTTTAGCCCTTAGTAATGA  
TGCTGTAAATCTAGATTAATGTGTACTATTACGAGAGATTATGCGCTGGTCATTATTTAGCCATTAAGAG  
AATAAGATATATGATGCATGTGTGCGGCATTGTATATGCAAGACTTTCTCCAGTATGTCTAACACATTA  
ACGTATCAGGACATGTTTAGTGGATACTCTAACGATGTATAATAGATGTTTCAATTTGTCTTTAAATAAAA  
CTCAAATTATATATTTACACACAAGGTGATCCAGAAATAATAGGTCTCTGGAACATCTGTAGAACTAGTT  
CCCTGACAACATTTCTCTGTGTTGAAAATACACTGTTAATACATATGTATTTGGCAATAGAATAGATCATA  
CCAATGAGATTTATTTTCATCTTGTAATAAATTATGGTACCGTTTCTGTTTCGGTTTGTGTTTGAAGTT  
AAGTAGCTGATTGGGCTGCTCTGACTACCATGAGTACCAACCTGGTTTATCGTGTGTAAGTCCGCCTT  
GGGGAGTTTGTGTTTCAAGAAAACAACAACGAAACAGTTATATGTGAGAGTATATTTTTTTCTACCC  
TGTACATGCATGCAACAATCCAGTATGATAAAGCGAACCGTATTACCCATGATCTTTTATCGCCTGTAAA  
AGTTCACAGACTTATTTATTGTACGCTAACTAGTACACTGTGTAATCTACCACGAACGATGTGAGTAGCT  
AAGTTCAGTGAATATTTATTATACACTAATTTTCTCGTTTCCGTGTCTGTATCCAGTCAGATTGGAGC  
CATCATAATTTGTCATTCTGATGATAAGTTAAACGTTTCAAATATGTAATACGAAACTTAGTGATGATA  
AAAATAACAGGATGATAGAAGACATGACCAACAAAGGATGGATTTCTTTTCGCTAACCCAAATCAAAACAGT  
CAGGGTCATGGCCAAATTTGGTTGTTTTGTGAACGTTTTGAAATTACAAGATTGTCCTGGTTATCACTGA  
CAAAACATTAAAAAGTTACAAAGCTAGATTATTTAGTAATATAATTCAACTGTGAATAAGAGAAAAGAAG  
GACTATATTCAAAACTTTTCTTCGTTCTCATGTGGTGTTAAAGCAGTATTTGGTTTAGAGTTGGATACC  
TTGTGGCATAATTCAGTCTTGATCTTTATTATGTTGGATGCCTTATGCCACAAATATGGCTCGTTGTTG  
TTTTTTTCATCATATCATAGCGTTCCCAATGCAACCATTGCGATGTGGAAAGAGATGGGATCTCAGTAAT  
ACTGTATAGGACTTTGAACACACTTTTCAGTCCAAAAACGTAACGTAAAAACTGTAAATTTAAAGAGACGCT  
TAACGTGAGAAGAATCCATGAAATTCCTGACATGTTTAAAGTAAAGAAAGTTTAAAAATATTATTTGATTG  
GTAATGAGTATTGCTAGTACGTACAGTGTTTAAATAGTTTTGTTAGATTAAACTGATTTAGAAAAAGTTGC  
TTCCAAACATTAGCATTTCTATGAATAAATCTTTTGGGATATGAAACTAGCCATCTCATATCATTGTTTAA  
CGGAATAAAAAAGGCCGTTAAACAAGGCCTCTGGTGTTATACACACTACAGTATTGTGTTGTCCAGTATTA  
AAGTTTTTTCATGGTTTTTCATAAGTTTGAACGATCTTCAACCCGTTGAAAGATCTCAC TTGATTCTCATA  
TGTAATCCACCATTAACATGATGTGTAGCTAAGTTTATTGTCTTTTTATTGTACGTTTGTGTTGACTCAG  
AGTAATCCACCATGAACATTATGTGAGCTTGACCTGTTTATTATACACTGATTAGTATACTGTAAAAGCT  
ACCTCAATCATTGTGGGTACGATGCAAGCATATTGTGAATACTTATCAGTGTTAACGTGAATAGTAGGAA  
TGCTTTTCGAAACTCGGAATGAAGCCTAAAAACAACAATAACATATATCGATTTCACTGATGCAAAGCACG  
TTAGTAAATGTCTTCTCTTTACGAACCGAAAGTTTTTTCAGTATTAAAAAAAGAAGAGAGAAAAACATTA  
GGCAACTTTCCATAGCTTAGGCTTATCTGTCAAAATGTTTGTTACGTTTGAAAGCTTGCTTGTTCTGTCC  
AAGTTCAGAGTAATGTAGTGAATGGCATCTCTTAGTATTGAGCAATGAAAGCTTATAATGATCAATTAGT  
TCGCGAAAAATTTACTTAAAAAGATTTGTATTAAAAGTATGTTTTCTACAACAAGATTATAGCCTCAATATT  
AACAGAATGAAATAGTTGTTGGATTGACAGATGTGTATTTTATTTCTCTGAAATTGGGAATTTTTTACAT

TTAGTAATGTTAATTATTGTCAGGCTTAAGTCGGATTGTAATTACGTTTTTATATATTGTTGGGATTTCTG  
ATAAAAAAGAACAAACGTGATGAAAATATCTTGTACGATTAAAGAGTAATCCATGTTATAGACCAATCA  
ACTAGAAACAAAATTCTGTTGTTGCTTTAAGTTTCACTAAAGTTAATCGAATACTTTAAAAATTTACGGTT  
CGCAGTTCTTAAGATTAAAAATAATTGTTTTGAACTAAAATTCTAAACAAGTGATTTTTGTACAATATCA  
AAAAC TAGTGCATATGAGGCTGTAAATGGGTATAAGTAATCCTAAAGAGGAAGTGACCTCTTCATCACAC  
GCTAATCAGTCTGGCATGGACAGGTGGTTGAGGCGCTCGACTCGTAATCCGAGGGTCGCAGGATCGAATC  
CCCGTCGCACCAAACATGCTCGCCCTTTAGCCTTGGGGCGTTATAATATGACATCAATACCACTATAC  
CAAGAGTTGGCGTGATGGTGATGACTAGTTGCCTTACCTCTAGTCTTACATTGCTAAATCAGGGACCT  
CTGGCGCAGACAGCCCTCCTATAGTTTTGTCAGGAAATTCAAAAACACACCTTAATCAGACGATTCTGTT  
TGTTTTCCAAATATTGTTAGTCTTTTGCTACAGGAATTAGCTTTGCCACAAGCTACCCCTCATTATAATT  
TCATCGATAGTCAGTATTAATTCGCTTTATCGAAGTTTAGTTTTATATTAATAACCTACTTCACAATATC  
TATAGACACAAATATCACAGCTGATGTCAGGACCTTCAATCTTTCTCTCTGAGTTGACTTTACAAT  
AGTCTGGCATCGTACACCAGGGAAGCAGTTTCATTTCAAGTGAATAAACAGTTTTGTAGAAATTTACTTG  
CTATTGGAACATAATATTTAGAATCAACAACAACAAAATCCAACCTTAAACCCAGAATATATCCCAAGC  
TCTTCTCCAAGTTGCCAGGAACTTAAACAGAAAATACTGTACATTTTTTATGGGAGAAGGAAGTCTT  
CCAATCTCACTTTTCAATACAGCCTTTCAAAGAACCATCTACACATTTGACATAGTCGAAATTTAATC  
AGGTACGAATCCGCATAATTAATTTATGATAACCGAGGTGATAATTTGATCAGATACGTAATTCATGCA  
GTTGTGTTTAGATACGTAATTCATACATTTACGTTTCAAGTACGTCATTTCATACACTTACGTATAGCTTTC  
AAAGTGAGACGAAACGAGGCAAAATATTATATACGTAGAAAATGCAGAAAACATGTTTCAAGATATTTAAC  
TGCCAGTGTGAGATGTACGAATGGGGAAAATTCATCTACAGAACTGGATATGGTAGAATTCACAAAA  
GTAACGTGGCAACTAATGAAATCAAGTAAAAATTAAGAAATAGGTTGCACCTGGTTCTATAAAATTAAGTG  
ATACGGTAGTATTTATATTTATTAAGTCTAAATAACATTTGACAGAGTTTCCACAGTTTTCGCATCTGTAG  
TTCAAATATAACCAAGATGAATCCGCACCTGGAGCTGTTAAGGTTAGCAGGAATATAAATGATATGTTAA  
TTAGAAAAACAAAACGTTTCTAAGGAATCTCTCCAACAAATTTAAAGAAGCATATGTTGTCAGGCTAAAG  
ACCTTTTCATAATATTTTGTGTTGTGCACGTTTGTGTATTTAGGTACATTATATATAAATCAACTTGCAAAG  
GGAATTTGTGATTCTTTGGGGACTATTAAGCCATTATCTTCACACGAACATAGAATAAATATTTGTCTAAT  
ATTTACATTGAATATAATTTGTCAAGAGAAATAAACCTGGTTCTTTAAAAATATTTTAGTTTTTAATGTTT  
CACTCAAGATGGAAAAACCAACACCAACAAAAACAATAATTAAATTGGTTTCTGTTTTCTTCATGATGCTTT  
CTTAATACGAACCGAATGACATCAATTGTATACCAACATTGTCCCTCCTTGTGTAACCTTTGGACGATGA  
CCTTTAATTTGACATTTGATTAAAAACATAACAACCTACGCGTACAGCAATTGTTGCATTACTTTGCATCC  
TCATCTATCATTTAAAACTACATCTAGGAGGTCTACTACGATCATAATGTTGTAGGTATATCTATTTT  
TCTGTGTAGGTGCATTATAAACATTATCTTTGTGTGAATATCTGAAAGAAGTACAACGCATATATCAAAA  
TAATTTATAGATCTAAGTAAATTTGTATGTATTTGTAATTGCTTTAGCTACAAGCTTAAACCTAAATGTGT  
ATTTATAATCTTGATTAATAGCATCACGAGATGAAAATACTGAAGTCAACATATTTATATTCATTGTAA  
AGCTTCGGGTTGGTTAACTTGTCTTTAGCTGTATCTAACTTGCTTGGGATCATGTATAGCAGAAGACGG  
CTATACCGAATAATATACAAAGGAAGAGCTACAGGCAGAACATAAGACAGCAGTTTCAACTTACTGTGT  
GATGTACGAAGGAAGATCTATAGCTAGAACATAAGACAGCAGTATAAACTTACTGTGTACTGTACGAAG  
GAAGATCTATAGCTAGAACATAAGACAGCAGTATAAACTTACTGTGTACTGTACGAAGGAAGATCTATA  
GCCAGAACATAAGACAGCAGTAAAAAACAGGTGTGTACGGTACGAAGGAAGAGCTATATCCATAACAGT  
AAAACAATAGTAGAAATTGATAACCATTTCAAATCATGATACACGCACTGAAACGATTGGAACAATAT  
CGAAACAATGGTAAACACACTAAAACGATTGGAAATTTATTTGAAACGATGGTACACGCAATGAAACCAT  
TTGAAAGGATGCGAAAAATCAAGGATCATGATTTAACATGATACATCAAATGATTTAACTTGTTTACAGCT  
GTTTATCGCATAGAACTTACTGTTTGGTTGAACTTTATTCTAATAAGATGAAATAAAGTTAAAAATTTAT  
AGAATGGAATCTTTACATAATTTACTTAATTTGTTGTATTCTGTAACATGAGTCCGTATAATTTCTTTGAC  
ACAAAATAAACTATAAAATAATGTATTTTCAAGTACTTAACATTTTTCGCTCAACACACTGATTTTAGTT  
TTTTAACTCATTGAGTACGTTTTGCGTAAGTTAATCGCAATGCGAAGATATTAGCTGTTCTGGTTAAAC  
TATCCTTTCTCGACCCAACGGCTTCTTCAGACTTACGGGCAAACTGCAGAAAAATGTACTTTAATGGAC  
GGTAACGACATTGATTTCTGGGGAGACATTTCTTGGCATCTCGCCCTCCTAGCTCGATTCTTCAGCTGA  
CAAGGAACGTGAACGAAAGAAACATCTCCAGATAAAAGCTTTTTCTGGACAAATGTTGGAGCAAAGTGG

TCACCAATTTTTCTTCCTAGCACCCCTTCCAATGTCTTATAGAGATGCTTTGGAAATGGGAGAATAGAT  
AAAGGAACAACGAACAAAATATATGTGTGAGAAACACGCGCTGATGCACTGTTTTCAAGTTTCCGAACGT  
AACAACTGAACTTTTAGCAAGAACGTGCAATGGAAAATAAACAGAATAATTTTTGTGATACAGAGTGAC  
TGACGTATTACACTTTGGAGAGGGAACGTATTGCCTAATTCTGTCATTTTCAGTTGTGTCAACTTGTAATT  
CACACCTGTCTTTTTTTGTAATAGACGCACACTCAAGTACTTTACATGAATTTACACAAAGTTAAGGCGA  
GGTAGGTTAAGGCGTTCGACTCGTAATCCGAGTGTCAAGGGTTCGAATCCCGGTGGCATCAAACATGCTC  
GCCCTTTCAGTCGCGGGGGCGTTATAATGTGATGTTCAATGCCACTATTTGTTGGTAAAAGAGTAGCCCA  
AGAGTTGGCGGTGGGTGGTGATGACTAGCTGCCTTCCCTCTAGTCTTACACTGCTAAATTAAGGACAGCT  
AGCGCAGATAGCCCTCGTGAGCTTTACGCGAAATTAAAAAACAAACAAAAACACCACAAAGTTAAACAT  
TAGATTGAGTAACAAATAACATAGTTTTATTTTTATATACAGGCGACAGAGTCGGGCTTCTGTATGATGTC  
ACGAAGTTTGGCGATATTCCCTCACGTTGTATTAATTTTTTTTTTAAATTTATTTATCATTTGATGTCGTATA  
TAACAATTTTCTCAATGTATATATATGTGTGTGCGCGAGACTATCATGTGTTATAACTGCAACTTGTTT  
TCACAGACTATCTTCTTGAAATATTCTTCAAATGGGACATTAGTAAATAAAGTAGTAAAGAAATGAAATAA  
CCCTACCAAAAGCTTTTTATTACTGCGAATGTAAAGGGAAACGAAAAAACACACACAAAAGAAACA  
TTTTTTTTTGTTTTTTAACAGAGGGCGACAGTGGAAACGGAGAGCTCCAGTCCGAAGTGACCCTGGGGGAAG  
CAGTGATGAAGACAACCGCAGCTCGACTCCGGTTAAAAAGAAAACCTGCAGAGAAATCGAACATCTTTCACA  
CCAGAGCAGATTGAAGCTTTAGAAAAAGGTGAGAAATTGGAAGACAAATCCATAAGTGAGAAAAATATT  
CATACTATGACAGAGTACAGTATTAAACCTAATATTATACATATATACAACCTTTGACCACCTCTCCCGCA  
CACACACAAAACAATAACAAACTATATTTGGAATTAGCTGCATCTGTTTGTAATAGCAATAGATTAATAT  
TTATCATTTTCTTTTATCACTAATGCCATTTTACGAAACATTTTACATTACTACCTTGCTTTTACGTCTA  
AGTTTACAAATCTAAATCGCTTCTTAAAGCCTTTTTTAATTTGATCCTATTTTTTTATGAATCTTGATGTGT  
AACTTCAAACCTGCTTAATTCTGAACACTTCTCTCTATGGTGTGAGAATACGTCTACTTTTGTCACTAAAGC  
TATTATCATATGGTGTGTTGTACTTCCATTCTGGTAATTCGTTTGCCTCACATTGCAAAAGTTGTGCCTA  
AATATTATTGTAATGGCGTTCGGTATCTGATGTATCTAACATATTGAAGACTACGCACATATTGGGCATT  
TTTATCTATAATTGCGTACGTATTAATTATCAGAGACGGTGCTTTCAGACATCACCTTGTAAGGATATAA  
TTACCAATATTTTGTGTTGTCAGAAATTCGAAAGAAGCTCATTATCCGGATGTATTTGCTCGTGAACGGTTAG  
CGGCAAAGATAGATTTACCAGAAGCTAGGATACAGGTAAAGATGTTTTAGTAAATAATATTTAAAAATA  
TATGGGCAGTAATAAACATGAGCTACCTTCAGTAACAACAACGCATTGGTGAGTATGGTATATTTAAGAT  
AATAATAGAAGTAGTTGTGTGAATGGTTTTATTACAGTGATGACGAAAGTAGTGCTGTGAATGTTTTATT  
TACAATTATTACAAAAGTAGTGGTGAGAATGTTTTATTTACAGTGACGACAAAAGTATCGGTGTGAATGT  
TTTATTTACAAATTATGACAAAAGTAGTGGTGAGAATGTTTTATTTACAGTGACGACAAAAGTATCGGTGT  
GAATGTTTCATTTACAATGACGACAAAAGTATCGGTGTGAATGGTTTTATTTTCATTTATAACAAAGGCAG  
TCGTATGTAAAAGTTTACCTTGATGATAACACAGGTGACATATCCTAGATTTCCCATGAAGCACACATCAT  
CTGTCAGAGAAACAACACATAGATACGTGCTGCACTTCAGCCGTTACAGGGCAACTTAAATTTGATTCTC  
GTTTCATACAGAGATATTCTTGCTTTGTTTAGTTATGGCTACATTTTATAAATGTAAGTGGTATGTCGGA  
TACCACCAGAATACATATTACATAGACTGAGAATCCGAGAGAAAGTAGCTTTCAATTCGTCATAGTTTCGT  
CAAATTCCTTTATAAAAAGCTGTTGAAAAACCTCAGATAATAAGGCTTAGAATCACCATATCTTGTTAGAG  
TTTAATCTGAATGAAGATCAGACTTCTTCAACGTTTCAGAGATAAAGAAAGAGCTATTTCGTTTTTACAGTC  
TAAATAACTATAACTGTGGAAGTCTTTAAATAACTATAACTGTGGAAGTCTTTAAATAACTATAACTGTG  
GAAGTCTTCAAATAACTATAACTGTAGAAGTCTTTAAATAACTACAACCTGTAGAAATCTTTAAATAACTA  
TAACTGTATAAGTCTTTAAATAACTACAACCTGTAGAAATCTTTAAATAACTATAACTGTAGAAGTCTTTA  
AATAACTAAAAGTGTAGAAATCTTTAAATAACTATAACTGTAGAAGTCTTTAAATAACTACAACCTGTAGA  
AATCTTTAAATAACTATAACTGTGGAAGTCTTTAAATAACTATAACTGTGGAAGTCTTTAAATAAGTATA  
ACTGTAGAAGTCTTTAATAACTACAACCTGTAGAAATCTTTAAATAACTATAACTGTGGAAGTCTTTAATA  
ACTACAACCTGTAGAAATCTTTAAATAACTACAACCTGTAGAAATCTTTAAATAACTATAACTGTGGAAGTC  
TTTAATAACTACAACCTGTAGAAATCTTTAAATAACTACAACCTGTAGAAATCTTTAAATAACTATAACTGT  
GGAAGTCTTTAAATAAGTATAACTGTAGAAAGTCTTTAATAATTACAACCTGTGGAAGTCTTTAAATAACTA  
TAACTGTGGAAGTATTTAAATAACTATAACTGTGGAAGTCATTAAATAACTATAACTGTGGAAGTCATTA  
AATAACTATAACTGTGGAAGTATTTCCAGCTCTGTTGCTAAGATACCGCATGACATTCACAGGCTGTTTC

TGTCCAGGTTTGGTTCTCCAATCGTAGAGCGAAGTGGCGACGAGAGGAAAACTACGGAACCAGAGACGA  
GCTGCCGAGCAAGCCGCTGTAGCAGCCGTCAACACAACACCGGCTCGTCTACCTCTCAACGCCGGCTTTC  
CCAATGCCCTGTACCCGAGTATCGGACAGCCAATGGCTAGTATGACAGACACTTACAGGTAGATAAAAAA  
TCCGGCTGTACTGAACTGCCTCTGCACAAAAAGCGTTTCTTTTTCAATGACTGTTTCATGGTAGCTAAATT  
TTATGCTATTTGTAAGATGGGCTTTGTTTCACCAAATGTTGCGAAATTCAGTTAATGTTTGTAATCATGC  
AAAAACACAACAGTTTGACCAGTAAAGAACCATGGTATACCAATAACTATTTATTGTCATTAAATCAATA  
ACGCCCTCTACTGGAATTCAGTGTATGTACTGGTGAAGTGCCTTCAGTATGTTTAGTTTCCGTGTTATTT  
TCAGTTCTTCTGTTTCTTTGTTTGGATGAAACTGTTTTTATTTTTCGTAGTTCCATTCCCTCCGATGTCCA  
CGTACTCTATGTCCAACAACATGGGTCTAGTTCTTGTCTTCAACAGCAAGCGCCATCTTATTCCTGTAT  
GCTACCCCCAGGGAGCGCTAGAAGCTACGATCCTCTGTCACTTGGAAGTTATAGTAGACCATCATGTCCCT  
ACCGCACAACCATAACGTCATGCAACCTGTAAATGGCCAGTTTCATACAGTTAACAACGGTAGTGCCGGAT  
CTACAGGTGATTAATTGTTTTTATATCTCTTCTGTAAATTGTGATATGTCATCCTCGTACAAAACCTCAC  
ATAACTGAGAAGTCTAGTTCATTGAAATATATGATTGTTTGTAAAAATTTCGCACAAAGCTACAAGAGG  
GCAATCTACGCTAGCCATCTATAGCTTAGCAGTGTAAAGCTAGAGGGGAGGCAGCTAGTAATCACCATCC  
ACGCCCAATTCTTGAGCTACTCTCTTACCAACGAATAGTAGGACTGATCGTCACATTAACCGCCCTCA  
CGGCTAAAGGGCAAGTATGTTTGGCGTGAGGAGTGTGTTGAACCCGCGGCCCTCAGATTACGAGTCGAGTG  
CCCTAATCTATCTATCCACACCGGGCATGAAATTTAAAACTAGTTACGTAAAGTCGTATCAACTCTTAGA  
GTCAGTTCTGAAGTACTTGAATAATAAGGACTCGTGATGTTTAAATGTATCATTCCTTATTTATCGAT  
ATTTTAAGGAGCGACACATGTTCGTAACACTTTAAAACTTTTAAAGTCAAACATGTTCTCAGTGACTCCTG  
GCTCAGATATCAGTGAATATCTCACAATAGATATTTATTTATTATTTTGGATTTCTCTCTACCTGTACAA  
GTGTGGGTAAAGTACAAGGTTTATTTAATCCGATTACAGTTTAGAATATAATTACAATCGAAACCGTTT  
CTGAATGAGCTGTGCATGCAAAATAAACGTGTTATCCAAAGCAATGTGCCAAAAATATACCGATACCACT  
GCATAGTTTTCTGTGATATAAAAAATATAGCGTGTTTAGCTACTGAATTCGAACATTGGTCTAAAGTCGGTC  
TATATGATTTACTATCTATTTTTCTCTCAATTTCTCTTGCAAGTTTCAATTACATTTTAAATTTTCATAG  
CATATAATTTCCAAGTCATTTGTGAAAGGTGTGAAAAGTGAACATAAATCGAAATGTTTATGACAAAAAG  
TTATTAACCTAAGAAAAAGCAATTATAAACTAGTAAGACTGAAATCCTTTCCTATGCTGTGATAATTTA  
TGAAGAGCAATAACCAAAAAGAGGAAAGATTATTACATTTAAATAAAATCTTAAGTGGTTTATTTCTTGC  
AATAATAAATTTGTTTCAGACCTTCTATTGGAAGGAGAATATGGCGCCACTAAAAAATGCCAGTCTGTGCTT  
AGCTGCGTTCCCTTCATATATGAATATTTTCAAGATGACGAAATAGCTTCAGGTTGAGATGTTTTCCTCGAG  
AGGTTAAAAAATCTGGTTTCTCAGTCTATAAATAAAACATCCTAACCAAAGGGCAAGAAGCTTTACTCAT  
GAGGTTCAAGTGTCTCATTTCTACAGTCTACACATCGGGCACCATAATCAAAGGGTGAGAAGCTATCTTTA  
AGACAGTCAAGAGTTCTCGTTCCCAAAACAATAAATAAGGTATCTGAACCAAAGTGTGAGCCATCCCTTA  
AGAGGGGCAGAATTCTGTTTCTTAGTTTCCAAATCGCTCTATACCATCAGCATATTTTAAAAAGACAAT  
AACAGTTATATTCAAGTTTACAGAAGAAAAGCCCTTCAACCAACTATTACGGTATTCATTGTGAAAAC  
TCATGTCGGTGTATAAAATGTTGTTACTAGTTAATTTTCGTTTCTCACTGATATATATTTTGCATTCCTC  
GAACTAATATTCTTAAAGTGATACATAATTAATATAATTCAATACTACCATTTTTTAAAGCGAATATTTATT  
TTTCCCGTTTATTTCCAGTACATTTTAATATTTTAAACTATATTTGTACATATGTTTCTTTGTTCCAAT  
TTAGGTCTGATATCGCCAGGGCTCTCTGTCCCAGTGCAAGTCCCAGCCCAGACTGGTGAACATAACATGT  
CCTCTGCCTATTGGCCAAGAATACAGTGACGTTGGGAGCGTCAGAAGCACGTATAGATAGGAAAACGAAA  
ACTAGCTTTTGACGCCCTTAACGTATTTAACCATAAGGAAAAGTCTTTATTAACGTGTTGGTGAATATAGA
