# Supplementary material for: Evolutionary Conservation and Diversification of Five Pax6 Homologs in the Horseshoe Crab Species Cluster
Source: MDPI journal article supplement (doi:10.3390/arthropoda2010007), 2024-03-04
Supplement: s1 [file s1]

>NW 013665662.1:1050481-1132380 Limulus polyphemus unplaced genomic scaffold,  
Limulus polyphemus-2.1.2 Scaffold52, whole genome shotgun sequence  
TTTTTCAGAAAAACGAAAAAAAAACGTTTTTTAGACCAAGAATAGACCCACATAGTCAAAATTTACCTCTGAC  
CCTTCAATAATCGAGGCCGAAAAACGGAGACCGTTCTCAGTACTGCTTCGGTGGAGACCCGCCCGCAGCT  
AGGCCCTAACTCTCGTTCGTTGTGGCTTCCCGGGTTTGCAATCATCACAGAAGATGCCACACAAGGTAAAA  
CATGATAACTGCATGTTATTTCTGATGTCTTAGTTTTGTGGATTTCTAAGGGTTGTCACTCTCTCACATT  
AAGGGGTCAAACGAACAACATAACTGATGTGATGGTAGTTTTCTGTTCTGTTATTAACAAACATTTGGTATG  
GTGGCAGTTTTCTGTCTGTATAAAACACAAATTGATTCAATCTGCGCATCACTGACGATGATCCGTTTTCTT  
AAATGCAGATATGAACAAAAATATAACCAGCCTTTAGTTTTCTGCGTGCAACATAAGATATCTAACGTTTTA  
ATATAAGTCCCCTTGTACGCAAGTTTAAACACAGAAAAGGGTTAAATAGATAAAATATACGAAGAGTATT  
CAATCCAAACCTTTCCACAGAGGGGAGAGGGATTGTGAAGCTGCAGGGGAAGGAATTCAAATTCAAATTTGA  
ACAAAATGGAAATACTGGAGGGGGAGATTTTTTTTGCACAGGGGAAAATCCCCCTGTACACCCCATGAAT  
TTAACACTGTATACGAATAGATAACTGATCAATGACGTGGTTGACCAAAGATGCTGGTCAACCATCCATA  
TGAATTTATCCGTTAGTATGATATCGTTTCCAAAGCAACATAAAATTTATCTTCAAAGAAATATCTAAA  
TGTTTTAACGCAAGTGTCTTTTTTTTTTTTACGTGTGAAGCAAACGCAACGCCCTTGTATACAATACAATAA  
TAATAAAAAACAAATTTTCAACTCCTTTTGCCTACTGATTACGCATTATTATCGTGTGCTAAGTTTAAATC  
ATACAAATTTTTACTTACCTATTACGCTCGAGAGCCAAATTTTGGGCAAGAGAGAAAAATGAAACACGCTCC  
TTAATGTAGTGTGCTAATTTGATTCCAAAGAAAAATTAAGCACCCGAAAAATAGACAGGACTATATATACAT  
ATATCAATAGAACCGAATTCGTGCTTGTATTTTTTGGGGTGAATATTGAGGAGGGGCTAATTTTTGTCTA  
CTCTGAAGAGCGTCACTGCAATTAACCTTTTCTATGTGTAACACAGCCCAACAATGTTCTGTCAAAC  
AGAAACGCTCTTTTCACTCTCTATACTATTAGTTTGGCAATAGCAGGCTATTCTTTGTGTGTTATTATG  
GAGGTTGCACCACAATTGGATTCCAAGAAAAATTAAGCACCCGAAAAATAGACAGGACTATATATACATAT  
ACATTGTATGCTATGTTCAAATCCCTTAGTAAATATCTGTTTGTAAAGGGATATGTAATCCTGTTATATA  
CAGATAAGCGATAGAGGCACGTAAGCAAAGTAAAGAAACATAGTCTATCTCCAGCATGGCAAGGTTAGT  
CGAGATTTTTTACCGCCCCCTTTCTTACTGCGCGTGTCTTATGAACGTTATCATCAGTCATACGCGCCCA  
TGATGTTTTCCAGCAACACATTCTCAGTGCGCGGTTCTTCTGTAGCTCGTGTCTCGTGCACCTCGTGC  
TGTACATGGAGGACTATGTCTAGATGGGCATTACACCATCGAAGGTGAGGTTTCAACCAAATTAGATCT  
GTTTTTACGTGTAAACCATTTTTTTTTTAAATTATATTATAAAAAATATTTAGTTTCAAGAAAAAAATACCA  
CGAATTTTTCAATTGAAAAATATAGACATATTTCTATACGTATTATGCTCACCAGATTCTAGATTGATAAT  
TCACACACATGCTTAACAGGCTTTTCACTGTGTTGTAAGATTGAAATTTGTTTCTATATATACAT  
TTGGAAATCAATGAATCACAACCAACATGAAGTATCAGCACACCAAAGTAATCGTAAACACTTTATTTATT  
GTGTTTATACATATAACAAATTAGAGAAAAATTTTAACTCAAAAAGAGAGAGACCTTCCACACACG  
CGTTAAACCAAGATGTTAAACCGACAAATTAAGGATACAAGTTTAAAAATTCAGCTTTTTCATCGAGT  
TAAAAAAGCTTAAACAGGCAACATCAGCAGACGCAAGTAAATGTACGATAGGAGTACAAAAATC  
TTAATACGTATAAATGGGTATCAATAAACTTATTTTTTTTTTAAAGAAATCATGTTAACGTGTAATGTATAA  
ATAAACTGGAACAGTAAATATTTATTTATACATGTTGGACTGTTTTATGATGTGCCTTACTGTGTTGT  
TTATAAGTGCAATCTTATTTGTGAGTTTCTTCTTGCCCTGTTATGCTTAGTTAACTCAGTGAAATTTTCCA  
TTTTTATGTTTGTGCGTTAGAAAAACACAACAACAAGTGTATTGGCTTACACAACCGAAACGAAATGCT  
CATATCACACAACCAACAACCGTTCTGCAAGTAACTTCTCCTTATAACATATCAGTTTGTAAACAAACCG  
ATTTCCCATATAATAAGCCACATTTTTTTTTTTTGCACGGATACCACAATTACGTTTCTGTTATAAGACAA  
AGTTAATTTATAACCACTCTTTTTTTTACTAAATTAACCAGGAAATGGGAACCTTCAAAATCTGTTTT  
GTTTTCCCTCTCTTTTTCATTCAGTATTTCCGACGCTGAGACGAATTTCTTATTAATCTGTTTTT  
ATTAAACGCTCTTTTAAATTTATAATTACCTTCGACTTATATACATTTATGTGTGTTCACTGCGTTAATT  
AATGAAAGTAAATCAATTACGTTCTTCATAAACTTGGTATACCAGCAAAAACCTTCAAAAATATATCATA  
TCACCTGTATTAAAGTTTACAAAAATATAAGGTTACTTTAGATTCCCATCTGGTTTAAAGTATATGTTTAG  
TATGTTCCCTCTCTTACTACTTTACCCGCCCCCTCCCGACATCTGAGAGATATTTAATTTTGTAGACATA  
TAATGTTCAAATTAGGGGCTCAATCCCTGCAGTAGCACTGCGACGACAGCTCATCGTGCAACATTTACGC  
AAAACATAAACAAACGAAACAACAACAACAAAAAGAAATGTGACATTTGTATCTAATAGACAGATAGATTG  
GTTAGAGTATCTTGAACCTTTATAAGTTTTCTTTTATTAACCTAGTCAGACTTTTATATTTATTAACCT  
ACATATTAACAACTTTCAGGAATTTCTAATAATGTTTAGTAGATCTTGAACATGTTTTTAAATCAAGTTA  
ATGCTATTTGAACATTTAATCCTCGATGGACAGAGCGCAGATAGCCACTGTGTAATTTTGCCTTAGAAA  
AAACACAACAACAAATGAACATTTACGTTTATTGCGTTAGAAAAAACACAACAACAAGTGTATTGCGT  
TAGAAAAACACAACAACAAATGACCATTTATGTTTGTGCGTTAGAAAAAACACAATAACAATGACCA  
TTTTATGTTTGTGCGTTAGAAAAACACAACAACAAGTGTATTGCGTTAGAAAAACACAACAATGAC  
CATTTATGTTTGTGCGTTAGAAAAACACAACAACAAGTGTTCAGTCTTTAGAAAAACACAACAATGT  
TTATTGCGTTAGAAAAACACAACAACAATGACCATTTATGTTTGTGCGTTAGAAAAACACAACAATGAC  
AAGTGTTTTACTGCGTTAGAAAAACACAACAACAAGTGTTCAGTCTTTAGAAAAACACAACAATGAC  
TTATTGCGTTAGAAAAACACAACAACAATGTTTATGTTTGTGCGTTAGAAAAACACAACAATGAC  
GTTAGAAAAACACAACAACAATGTTTATGCGTTAGAAAAACACAACGACCATTTATTTCTTCAGAAA  
AGACACAACAACAACAATGACGTTTACGTTTATTTTCCAGATACGTGCTGGTACGTTATTGATGAAAT  
GATCATAATTTAGATTTTGTTTTTTAAAGTAATTAAGAAGTTGATCACGAGTACTTTAGAACTGAGTTTA  
TTTTCAGAAAGTATAATAATAATGTTTATAAAGTATTAATTTTAAAAATAATCATAATTAAGAAAAATAAA  
CCGAAACTCAATCATTTCTTCACACAACGTTTATATGTACATACATATATATTTATCCAGGAAACATCTCT  
TGTTAATATATATATTTCTTTTTTCTTGCGATCCGAAACCTATATGATAAGCTTAAAAAAAAGAGTT  
GATAATAGTCTTCTCTTAGGTTGCAAAAAATGCATCTCATTTTGTGATTTGTTTTCTTTATAGGAAA  
ACCGTCGTAAAGTGTCTTAAACCGATATTGGAGAGATTCTGTAAATCAGAGTTAATTTTTGAGGCTTCTG

[illegible]

TTTGTATGTTGTTGTTGTTGTTGTTGTTACTGGTAGAATAAACCTTAAACCCTAAGATATCACATTTTCATGACG  
TCATACAGGCATCAGAAAGTTGTTGGCTAATTTCTCGACGCTTTTTCTCAAACCTATATTAACACAACAAAAATA  
ATCAGGTGAACAGGATCTGTTTTATAGTGTGTTAATTTGAAATTTACATGTTTACAGACTTGGTAAATTTCTA  
CAGACGTTTGACAGCCTTTTAATCATGTATCATTTCCATTTCTACACTGAACTACTGTACCCCTGGTTACTGCTT  
ACTCAACTAAGCTGATAAGAAAATATCAGCTTTAAATATAAGTTTGTAGCTTAGTTTGAACAAATTCAGGGA  
ATCTTTTATGCGATATACAGAGGATATACAATATGAGCAATTTGTATACGGTGCTTTTGACTTTATCTCAGTG  
CTTAGCAGAAAGAAAGTCTAAAAAAGTGCAGAGGATATGTTATGTTTGTGTGAGTGAGGCGCAGCAAGCG  
GAAAAAGAGTCCGATTAGGAATGATGGACCCCTGAATCTTCTGTAATATCTATTGTTGAAAGTACGGCA  
TACTAGATAGAGTATCACCCCTTTGTAAACAACTGTACAACGCACCGGGATCTTTCACGCGCTGTTCCG  
CCACTACTACTAGCTACACGTGTTTTGTGTGCGGCTATATCCCCCCCCCAAGCGAGCGCTGTTTTCGCGGG  
GGTACATTTCTATTGTTTACAGCAGCAGCAGCATTTCTAAAAACCAATTTTGATCTATCTCTTGCTGATTGCA  
GAGGATATCTTTATTGATTGTTGTTGTTGTTGTTGTTGTTGTTGTTGTTGTTGTTGTTGTTGTTGTTGTTGTT  
TAATTGATCCGAGGATTATCGCTTTTATTAATTTCTTCTGAAGCGAAGTTGCCTCATAGAGAAACGGCGT  
TGAACGGAAACAGCCGTTGGTACAAAGATCGTGCAAGTGAATTTGTCGTTTCTGTTGGGTTTACCCTGAGTG  
GCCTCTTAATCTACTATAAACGCAAAAGTATTTCTACTATCAACCTATCAGGAATTTTAACTAATCTAG  
ATTTTTTTTAAATCTTTTACGACAAATATGTATAAAAAAATTCAAACGTTCTAAAATCATTAACAAAGA  
GTTTTAATAGAGTTCTTCGTTTGTGTGCAAAATAATTATTAAATTTATCAAACCTAATATTTTATCAGGTTT  
TTTTTCCCTCTTAAATCTTAATGTTTGTAGTGTGCGAAATTTATATCAGATTAGTGACTTATTTTCGTTATTTCCG  
CTCTTCTGTTTTTTTTATTATGTTTTCGAGTTTTTTATCTTAGCATCTAGAAGTCTTCCAGGTTTTTAAGAT  
TTGAAACAAAAACGTTTCACACGTTTATGATTTATTTTCAAACCTTAAAGGTTTCGATATACGACGCATAGGT  
TAAGTGACTAGGTCACTAGATCAAAGACCCAAAGGCTCAGGCAATGTTTCATCGGCATATTGCAGTTTGAAT  
TTTGGACCTTCTGATCAGCAGCCCGGCTTCTACTACTAGGTGCTTCTGTCCTTATACAGCTTTTTATT  
TGTGATAATGCAAGATTCAAATCAGCTGCAGTCCCTTAAGTATCACTCAGTTATTACTCTTGATGTTT  
CTAACAAAGAAGCTGAATTTTTTAGTATCATCTAATACAAATCAGAACATACTTTATATTTTTTACATGATGG  
AGCAGGTTGTTAAGTTATTAAGCTTTATTAATACATTTTTTACACAAGATATAAATTTGTTAAACATTAAGCT  
TTATTAATACATTTTTTACACAAGATATAAATTTGTTAAGTATTGAGCTTTATTAATACATTTTTTACACAAT  
ATAATAATTTGTTAAGTATTGAGCTTTATTAATACATTTTTTACACAATATATAGTTTGTTAAGTATTAAAG  
TATATTTTATAAATTTTTTACACAAGATATAAATTTGTTAAGTATTGAGCTTTATTAACAGATTTTTTACACAA  
GATATAAATTTGTTAAGTATTGAGCTTTATTAATACATTTTTTACACAAGATATAAATTTGTTAAGTATTAAAG  
CTATATTTTACATTTTTTGCACAGATATAATGTTGTTAAGCATTGAGCTTTATTAATACATTTTTTACGCA  
GATATAAATTTGTTAAGTATTAAAGCTATATTTATACATTTTTTGCAACAAGGATAATGTTTAAAGCATTTGAG  
CTTTATTAATACATTTTTTGCCTAAGATATAATGTTGTTAAGCATTAAAGCTTTATTAATAGATTTTTTACATA  
AGATATAAATTTGTTAAGTATTGAGCTATATTTATACATTTTTTGATACAAGATATAAATTTGTTAAATTAACAC  
ATTTGCCACAAACTAAAAACATCGTTAATTTGTAATTTACTTTTCAAAGAAAAAGTTTTTGATCAGTGC  
GAATTAACCTTTTACTTTTAGGGCTTATCATTAATTTATCTTAAATACCATTATTATACATTTTTAACGTGAGA  
ATTTGCTGTAAACAATTTATGCCTTGGTTATGTTTCATGTACTTAATGTGGTAAGTATGCTGCTGCTGCTGCTGCT  
CTCTGGGCAACTCCAAGTTTCCATGATTTTTATGAATCATTATCTAGAGAAAGAATTTCCCTCTCTGTTT  
CTGCTTGAAGATTAATAATTTGAGTCCAGAGAGACTCATACATCGGTAAATCTAGTGATATTTTGTAGTG  
CATGTGTGTGTTATTTTGTCTCTCTTTGATTTTTATAAAGAATATAGACAGAATATATTATTTCTGACCCAT  
CGTATGCGTAATGTTTACCAAAAAGTTAATATTACCATTACCTTTTGTAAACAATAATATATATATATAT  
ATAGTCCATGCTATTAATAGGAATTTCAAACGTTATATACAAACAACCTGAATCACTACGTAAAAACACAAA  
ACCTTCATCTACTATTTTTGTTTCAACGTGCATCTTCTGTACACACTCAATGACTGACAAATATTTCACTGT  
TTAAACTGTTTTCTGTTTAAATGATATACGATATTTGTCGTGTTTTTACACAGTAATATCCATTTCTTTATAA  
GTTAAGTTATCTTTGGAATTGGTCAAATTTGTAGGAATATTTATGCATCAAATTAATTTATTTCTTTTT  
TATAAAAGATTGCTTAAATCGTCAATACCTTTAAATTTTACTAATATATTTCTTGACATTTCAAACCTATCTTT  
ATATTAATAATACATATTTCTTAAATAGGCACATATTTGCTTATATAAAACACCTTTATTAATAATACATAT  
TCCTATTAAGGCACATGTTGCTGATATAAAAAACACGCTTGTTAATAATACATATTTCTTATTAAGGCACATG  
TTGCTGATATAAAACACGTTTATTAATAATACATATTTCTTATTAAGGCACACGTTGCTGATATAAAACAC  
GTTTATTAATAATACATATTTCTTATTAAGGCACATGTTGCTGATATAAAACACGTTTATTAATTTCTTTTT  
AATAACAATATATAATATGTTATATTGAGTTACATGAAATACAAAATCAATACTCCCACCTCTCAGTGA  
ATCAGCGGTAAATTTGAAAACTTACTAGGCTAAAAATTCACGGTCTGATACCCATGGTGAGCCGATAGTCT  
AGCTTTGTGCTCAAAAATAAAACAAACAGGTAAGTATACAGTACAGTGATTAAATAGGTATCAGTTGAAG  
AAATATATGAACATGTATAAATATACATATAGAAAGAAACAATAAATATTTGAAACGTTCTGTTAATTTGT  
TGAATACGACCTTTATTTTTCTGTTTAAATGTTTACATTTGTTATAGAAAGCAATAAACTCTCACTTTCT  
TGAAGAAAGAGGATTTGTATTCTTAACAAAAATACCAATTTTCTATATGTTATTTTCACTCCCATACCTCTG  
ACTGTAATATCCATGAATATAATATCAACTTCTCATCATCCGATACTCGTAAATCCAAGAGCTCCTGACT  
GATTGACTGTACTTGTTTATGTTCTCGATGTTCTTCTCTGTTTATCAAAGAAGCTATCATATCACATCA  
CTTATTGCAAAAGTACTCTCAATTTCTGGATATTTGCAAGCAAAATGAAAGTTCTCTGGAATTTTGAATTT  
AGGCGTCAACAGATTATCGCCCTAATAGGAGTGTGTGTGTTTAAAGATTAGAGCCCTAATAAGGGTGTGT  
GTGTGTGTGTGTGTTTACTGTTTATAGAGATTAGAGCCCTAATAGGGACATGTGCCTACAGATTTAAAGTCAT  
AGTAAGGGTGTATGTTTACCGATTAGAGCACTAATAGGGGTGTGTGTTTACAAATTTGCCCCAACAGG  
GAGTGGCGTGTATGTTTACGATTATTTGCCATAACAGAGGTTGTGTTTACAGTAAATGCTCCCCAACAGGTTTGC  
GTGTTTACAGTTTATAGCTCTAACAGGGGTATGTGCGTTTAAAGATTAGAGTCTTAAGTGGGGTGTATGT  
GTACTTCAACCTATTTATTACTGAAATAAAATGTAGTTTAAATATTTTACCCCTGATTATCTGTACCTCC  
TTAATTTCTTGTAAATCAACTTTCTAGTCAATAACAAGCATATGATCAAAGACCAACTGTTAGGAATTTCA  
GTTACCTGCACTTATTAAGATATATGTTGTTTTATTGTATAGTATTTGATGTCATATATGTAACCTAAAA  
TGTTAATTTGTTGTATTGAGCTATCGACTATAGTCACATGGTATTTTTCTTTGTCTGAAGCACCTATCAA  
AATATTTAAATAAAAAATTTACTTACAGAAGGCTGCAGGGGAAACAAACACCTATCAAATATTTAAATAAAAA  
ATTATTTACAGAAGGCTGCAGGGAAACAAACACCTATCAAATATTTAAATAAAAAATTTTACAGAAGG  
CTGCAGGGGAAACAAACATACATACATTTGGCACCATCATCAACACATAGTATTATGGTAATGAATGATATCT

[illegible]

GGGACGGGGATTTCGAACCCACGACCCGAGTTTGGCGAGTCGAGTGCTCTAACCACCTGGCCAAGCCGGGC  
CAGTTATTTTAAATAACCATCAATTACATTATTTTCAGTAGTTCTCTTAAAACCGCATTTCCTGTAAATAC  
TCAATCGTCGTTTCAAAAACTTCTCTTCATAACAAAAGGCTAATTAATTTTCAGTCGGTGCCAAATAAATCC  
TTGGTATAAAAACTCCCTCATTTGACAGGCTTTTATATAGCAGAAAAAGTGCCGAAACATAGGAGCTATTT  
ACACCCATGTCAGCGATGTCAACTAAAATGGGAACAGGTAATCAAAAGAGGAAGTATTTATAGGAGAAAAA  
GTGATATTTTAAATCGTGTATTACGACTGACACTTGGCTTTTGTGATTATGGCTTATTTTCATTTCTATA  
ATACCCCTCAAGATGGTTCTACAAATATCATAATATATATTTTGTATTATGGCAAAGCTACTAAAGCTATCT  
GCTGCTATCCCTCATCTCGAAGTATCAACTAGGGGGGAAGGGAGCCAGTCAGCAGCACTCTGCTATCCCC  
TGTCACCGCTAAAGGATTGGCTGTCACTCTTAAAAAAGAAAAATGTGTTTCAATTTCCGAAAACCAAACCTTAC  
TTAAAAAAGAAAGTTTCCCTCTTCACTTTTAAACGCAGGCCCTTCCAATTAAAAATAGATTAAACATCATCT  
GGACAAATTGCTAGAAAAATAATGTTGACCTTCACAAAGGTCACTCAAGGGTAGAGATTGTGACAGTT  
TTTTTTTTTTTGTTTTGTATTATCATAAAGGTTCTTAAGTACTGACCAACTCACCCCTAGTAAGTAGGTTTTT  
CAGTATAACTGCATGCATGACACTGTCTGTGTCCACTTGACTTTTCAACCATTTATACTTTACGTTGGAA  
AAAGCTGTGAGTTGTTTGAATTCGTATTCTATAGAAATATAAATATCGTGACTTAAATAACACAAAATGAGCTTT  
TCGATTTTCCAATGCTAATGTGTAAATAGGGTAACACATTCTGACTGTATATAAAGTGCATGTATTCCAAA  
TATTCACGACGTTTCGAGTAACCGGAGAAGCCATTGAATTACATTTACTAGGGTTTTACTGCAATGCTAA  
ATTATATCTTCTACTCTTTTTTTCTAATAAAGTGTAAGGTTTCAGCCGTTTTACGAAGATTAGGAAGCCAG  
AGATCTTCTAAGGTTGAGAAAGCTAACAATTCGTATTCTATAGAAATATAAATATCGTGACTTAAATAACAAAGCTTT  
CGTAATTTCTTCATATGGTTTGGTTTTGATACTGACACGCAAACGTACAAATATGTTGTTTTTACATAGAA  
TAAATAGGCTTACCAATAACCTCCATGTCTTTACCCCTCCACCCGAGCAAAGGTATATATATATATATA  
TATACACATACAAACAAAAGTCCATACATGTAAATTTATATATTGTTTCGTGTTCTCACTTAGGTATCGTGT  
TACTTTTTGTGATGGAAAACTCATTATCTCATCTCAAGCATGTTAATAACACAAAATGAGCAAA  
AAACACAGTTTTATTATGCGTCGTCAATTTTCTTTTTAGATACCCAGTGTTTTAGCTTCTGTGCGTTGAAAT  
ATTATATTATCGTCTCTATGTGAACCATTTTCATGTACAGTTAATTAATAACAATGTTTCGCCAGCTTGGAA  
AAAAAGCGTTACATCATAACAGTTATTGTTTGTCTCTGGTGTGTATCCAGTGTATTGATGATAAAAA  
AAAAAGCGTTACATCATAACAGTTATTGTTTGTCTCTGGTGTGTATCCAGTGTATTGATGATAAAAA  
AAAGCTGTGAGTTGTTTGAATTCGTATTCTATAGAAATATAAATATCGTGACTTAAATAACAAAGCTTT  
AATAAAGAGCAGAAATGTGATTAAAAAGTGGGACAAGGCAAGTAAGAATTACTTTTAATACCTTCTATATC  
AATCTGGTTCATAACACAAGTGTCTTGTAAAATCATAACGCAAGTGTCTTGTAAAATCATAACATAACTG  
TCTTGTAAAATCATCACAGAAGTGTCTTGTAAAATCATAACACAAGTTTCTTGTAAAATCATAACGCAAG  
TGCTTTGTAAAATCATAACACAAGTGTCTTGTAAAATCATAACACAAGTGTCTTGTAAAATCATAACATA  
AGTGTCTTGTAAAATCATAACATATCTGTCTTATAAAAATCATCACAGAAGTGTCTTGTAAAATCATAACA  
TAAGTGTCTTGTAAAATCATAACACAAGTGTCTTGTAAAATCATAACACAAGTGTCTTGTAAAATCATAA  
CACAAGTGTCTTGTAAAATCATAACATAAGTGTCTTGTAAAATCGTAACACAAGTGTCTTGTAAAAGCA  
CAACACAAGTGTCTTATAAAAATCATGACTACTCATGTATTTTGAATTAATTAATTCGATCTCATTGTTTACAAATCT  
GTGATTTTATGGGTGGAATGGCCTAGAGGCTAGGACGCTCGACTTGCAATCTACAAGTCGTGGATTTCGAAT  
CCAGTCATCAAACATGCTCGTCTTTCATCCGTTGTAGCGTTATAATGTAATGATCAATTCGAGTATTTCG  
TTGGTAAAGAAATAGCTCAAGAGCTGGGTGGGGTTGAATAGCTTCCCTTCCCTCTACTCTATTTCCCTCACA  
ATTAGGGACAGTTGAGCGAGATAGCCCTCAGTACTGATGTTTTCGCGGAAATGCAACAAACAAAGCTTTAT  
GTATGTTACCCAGAGATACATGAAAAATAATTGATTTCATTACAAACATTTTAAACCAGAGTAAAAACGAA  
TAAAAGTTTGCAGACTGTTTAAACACATTATTTTTTACTTATTTTCATGCAAGAATATTTCAATTCATAA  
ACCAATGAATTTCTAAGAAATTTACAATGTCTTTGCGTAAAGTATTTGTATATATATTACTATTCTTTGACT  
TAATGAATTTCTATGCTAGCTAGCTAAGCAACAGATGCTCGCTCTACGACTGTTTTTGTGAAAAATGATAA  
ATTTTCACACAAGAAGCTACAAAATAGTGACATTATATATATGTATATCAGTATAACATTTACCTGAAACA  
TAAGTTCGACAGTAAAAGCTGGTTATCTTTGCTACACCAGAAGTCCCTATTTATCCATATAAAACCTGAA  
TGTAGAAAAATATGTACCTGTACAAAATAAATAAAGATGAAATATATATATATAAATAATGTCAATTTACT  
CCCAAGTTCAATTTCTTTTTTGTAAAACAGACATCATGATCATTTCAACATTGTTTGTGTTTGTGTCAA  
AAAAAGTTACACAATAAGCCATTTGTGCTCTGCCTACCGTGGATATCGAAACCCGATTTGTAGCGTTATA  
AGCCCTCAGATTTACCGCTGCAACATTTGATCAGAAGTGCAATAATTAGCCATTTAGCTTGCACTCATA  
AATGAGCACTTAGTAGAGTTAGCTTTAAAACTTTACATTTCCATCATAAATGAGCACTTAGTAGAGTTAGC  
TTTAAAACTTTACATTTATGACGTTCTGCTTCAAAAAAAGCCAGGAAACTCTTCGGGAGTGTG  
AGGAGAGCCGATATCTTTGTAATTCTAGAAAAACGTTTAAAAACAATGGAACAAATATAGAGAAGTTCTCT  
TTGTGAAGTATCGGGGTTGAGGATGCAGCCCGGTAGACTCTACCCCTTAGCTACGTCTATCCCTCGAACAC  
CCCTCTGAAGAGTTTTTTTCTAAGATATCTCCACTTGATGGAATGTGGCGCATCTCCCAAGAGTACCGT  
ACATACCTGTATGCTAGCGTGCATACAACTCTTTGGGTGCATCCCGCCTTCTTTAAAGAAATGTGTCGAC  
CAGTTTAGCAAGGAGAAGGCAATAATTTTTATCCATTAGACTGAAGTTAAGGCTAATTACACCAACATAT  
GGCAATACAGAAGATGTGGTTTCGTATAGCGTGAGGTACCATTCGCAAGATATAGAGGCTTATTTCTTTTC  
CATATCGTACTTACACCAGCATTATGTCTGTTACGTACCTATTTGAAAATGTGGCTGGTTGCACCTCTAT  
CTGGCTCTAGCGTGTAGAATATTGCTCTACGTGTCAATTAATTTACTGGACGTTTTTCTTGCGCTCATTACA  
TCTGAGTAGTGTTTTTATTTTTTGCCTTGTGTGAGAAGAATGCATTTCTTTGGGTGTCTTCTATACAGGC  
GTGCTTGTGAAGTATTTTTTAGCTCTCTGACGCGATGTGCAATCACGACTGCGAATATTTGATTCGTTCTC  
GGTGTAGGTAATATTCATTTTCGGTAAACAGAGTAACAAGATAGCGGGTCTTTGATTGTGTTGTAGATA  
ATAGTGTACTGTGTCTAGATTTCCCACTCAAGTCTTATTTGGTTGTAAAATGGTTTCAAAATCTCCAT  
ACGACTAAAACATCCAAAAGTTTTGATTGGACACTTTAAACACTGTAATTCATTTCAAAGTAACAACCTTA  
GATAAGACCCGTGTAATATATATATATAGTAGAGACTGAATGATTTATTTATTTGCATTTCAGAAGACACG  
ACTGATTATCAGATGCTTGATTACGTAACAATGAATAAAGTGTGGGGTGAATGTCAATTTTCAATAC  
AATGGATTTAACCTGTCTAGATGTAATATTACAAGTCCAGATAATTTGTTTTTACTGTTCTTTGAAGCGC  
ATGTTATCAGGCGGTGACTATATCGATATTCCCACTTTTGCTAATCGATGTATCTTCTTTGTTGAGATAA  
CGTTAACATAAAACATTTGCTACTTTAATAGTTTAAATCATGCTGTTACTTTATATCACATAACAAATATTGT  
TTATAGTTTATGGGTTTTTATGTGCAATTAATAATATACAATTTTGATATATGCTTTTATACCTACTTGGCG  
AGGGCTTCGAAGTATGAATTTACTCGCGTTATTAGGCATTAATAATTAATAATATTTACCACTTTTGAATT

CGGGTATTATGTTTCGAGTGTACTCTTATATATAAAACCTCACGAGAGTGGGGACTTAGATTAAATAGAATATA  
GAGCAGTATATCTCAAAGTAGGAAGGAGAAAACCTGGAGCTTGGAGTTGAAGAACAAATAAATATATATGA  
AAGATATTCCCTTGAACAGTACAACATATATGCACTTTTATATATTTATCTTTTCTTAATAGTTTAAATTA  
TATTGAAATGTATGTATATATGTAAATGTATGTATATATGTATATATATATATAAAACCTCGTTGACA  
CAGACTTCAATGTTGAATAAGTATGCGCTTTCTAATCTAATTTTTTGTGTTTCACTTAAGAGTCGAATCT  
GTTACGCATGTGTATGTATATAGGCCTTACTTCTTATAATGCCGAATAATTTTGTCTATCAATACGATCCAT  
TATATGTGTGATATTTTACATGTTCTGTATGTGTGATTATCATCTTGTATCCAAAGTTGGCTGGTTTGA  
TTACAGTCATTTTTTCGTATGGTATCTGAAACTGTCGACGGTGTACATGGGCTATTTTCATTTTGAATTT  
TTTGCCCAAGAAGGTGATAAAAAACACTCTGAAATAGGTCCCATTTCCACTTCATTATAGACTTTTGGTT  
TGTAAATTTTAAAGACACGAGTTAATCAGTTAATCGAGTCACTTATTACCTTTACCAAGCATGGTATGGAA  
TTATCATCCAATGAGGTCAATAGGAATCTAATAACAAAAGAAAGAAAGGGGAACATTATCTAACATT  
TTAACGAGTACCCTCAGCTCTGTTTATAAATAATATTGCATAACGAACGAATATTCAGCAGCTTGGAA  
TCGTATAATTTTTTATACTGCGCGTGCTACGT CAGATCTTT CAGATATCAGTAAAATATAAAATGCTAAC  
AATCTTCGTACACTTAGAGGTGTTTGGTTGTGAAGTAGCTTATTGGATCTTTGTTTGAATAGGAATAAGA  
CGCTAGATAAAAGTAACAGCCTAAGCCTAAAGCACACATACACGACATAGAGGAACATATAAATATGTA  
TATATTTATATATAGACACACACACACTCACACGCGAACACGACGATATATATGTTTATACATATATTG  
TGAAGCTAAATAGAAATGGGTGAGTATAAACACTAGCCATGGAAACTGTCTAAAGATGAGGGTTGGGGG  
TTGTTTAAATCATCACATAAATTTTCATGCTAATAGATATATATATATATATGTCAACCGTGAAGAGAAATTTG  
CCGAAGCCTTAACATAAATTGACACGACTTTTTTGTCTGTATGTAGAAGACTTAAGAACCGGCTGTACTC  
GTATACTAATTTAAATATGCACGTATCTGCATACACATATATTTTGGTGTCTATATCACATAGCACTTTT  
GTTTCAAAGCAGTCAAACAGATGACGAGACTGTTATACACACTCTTCAGAGAAATTATACATTATCTTCT  
GTTAAGTGCTTTTATCTCGGTTTCCCCGAAAGAGTTGAAATTTGGTTTATATAAATGCGCGGATCATGGAG  
TGCTGTTTGTGTGTATATATACACATACACCTATATATATATACATACTCAAGAGGATTTTATTG  
CCCAAAGCTAAAATGTATTTGAATCAAGTGGTGGAAACCTTTGTGTGAGTTTTGTGTTCAATAATCCTTG  
TTCCAACTCAATTAGCCTATTCCCCAAATGCCTATATATATCTCTCTGAGTTTATTAATTAATGAATA  
CGTTGTAGACGATTTTAAAGTGTTCTTATTTCTGTGTTATAGAGAGACGCAAGAGGTTATGGAGATT  
CAACACTTAACGATGTGTTTTCTGTTCATATGTATGTATACAAAAGTTTCGATGCATGCCTTTTCGAGA  
AATTCGTAACTTTACAAGTAAAGTCCCTAACTTTGCGTGAAATAACACTAGTATTTTCTGCGAATAGCAC  
TCGATCGTGAAATAGAAGACTACATGTAAGAAGAAAGCAGAATAACTCTTCTTTACGTGTTATTTTTGTTT  
GATTCATGATTTTCTCCGACTTCTAATCTGTCACTCAGATTTTTTAAAGACACGCCCCACTAATCCCTTCCA  
TCTAAGAAATACTTCTCGCGGAGGCAACCTCAGAGCGTGGTTTGGAGAGCAGCTGTGGTTGTTATGGGAAG  
ACTCCATGGATTTTGGTGCCGCGTGAATCAGAGCGTGCAACTACGACTGAGAACGAAAATACACATGATAA  
CCTTATTACTGTTTATCAGGTATACAAGTGACATATTTACTCCTCACGAGACAAAACATGGCAATTTTT  
CTTTTCGAGTTACTCGCGGAAACGGGCGTACGAACTAGCAAAAGTAACTTAAGAAACAGACAGACAA  
GACCAGAGTTAGTACTCTTTGACCACGGGTCTAAATCTTTGCCAGCCAGTTTCTGTAGTGAGAAAAGAA  
TTAGAAATCGATTCTAATGACACATTAATCCCATTATTTTTTGTAAAAACATGACGTATGTTGTTTACACC  
TTACCTTTGCCTAACGGTAAACAAACAAACGTTCAAATCTGAGGAATAGGCTAATGTTTCCAGAACCATT  
CTTTTATAGGATTTTATTCGATAAATCCCATTATTTTTTGTAAAAACATGACGTATGTTGTTTACATCTTTCC  
TTTGTCTAAACGGAACAAACAAACCGTTCAAATCTGAGGAATAGGCTAATGTTTCCAGAACCATTCTTT  
TGGGGATTTATTCGATACAACTATGTTGATTGAAATTTCCGGTAGAGAACAGTTATCATGAAATAACTGC  
CAAAGCTCTTGTTATATTAAGTGAAAGAAAGAGAAAGTACGTATTAGTTCCAGTAATATTTATTTGTTTGGCA  
TCCAGACTAATAAATTTCAAGAAATGAAACGTACATGTTATTGAGACCATCTTGTACGATAATAAGTTGT  
TAATAGTAGTTGTCAGTGCAGTATTTCTGTATCTTCTATTGGCCCCGAGCTATTTCAGATTACTTTAATC  
AGGCCTAATAACGCACACACATCCAGTGAGTTAAGAACTGACATGCTTTGTTAGTGCGTAGATTAGTGGC  
TAGCAGATGAATGACAAGTTAGTTACTAGTTTCTTCATTTGATTAAATTCATGACAAGTGAATATAGATTA  
TTTTTAAACGATGAAACGATAGCAAAATGACAAGTACGTCATTATCTTGGATAAGTTCTAAACGGAAGGC  
GCTGGATTGCTCAAACCTTCATATCTTATGTGTCTATGGCCCCCGCAACTATGTGTCACTCTGAGAAATAT  
AACGCCTTCTGGTGATAAAGATTTTTTCAAGATTACTTTGTCTTTTGTAAATTTAAACTCACGACGAGAT  
TTAATAAACATATTTCTCTGGGGAGAGCTTGAGATTTAATTATAGACTTTTATTAAGAAAAAATTAACAT  
ATTTGTAAAGACAATTTAGATCAGAATTTGAGATGAAGAACCAACTTTGTGTAACAACTCGCATAGGT  
TCATTAAGGTTAATGTCGATGTTGTTGTTATATTAGAACAAATGCATAACAGTTTATGTGCACGCTATT  
TACGGCGTTGTAAGTCTGTAAACCTTTTCAAATGCAATGAGAGAAAGAAAAAATATTCTTATTTTGTATT  
TAGCATACAGCTACTAAGGTTATCTGTCTGCCGTCAATTAACCTTCAACTACTGACGAGGGGGAATCGACAG  
AGCCAACGACCTCACTAAGCTCAACCTACCGCTAACGGGATTTGGCTGTCACTCTTAAACGCACAAACAA  
CTTAAAGTGCACTGAATGTTTACGATATCGCACGAATTCGAGCTTGGCTCAACAGCTCCGAAATCCAGA  
ACACTACAACAGGTCACACCGCTAGTAAGAAAGGAAAAAGAGAAAGAAAGAAAGATTGTATACATA  
TAAAGAGAAATAGACAGATAGATAGATAGATAGTATTTTCACTGGGGAACATAAATTAATTTCAAAT  
ACATTATCGAGAGTGGTGTATGTATTAGTCTCTACATGTTTGAAGAAAAAATGGATTCTGGATAAACG  
TTTTTACAAAATGTTTTTCTAAAAAAAAGTTTCATAAAATATCCAATGTCTATTAACCTATGGTGACAAACA  
CATCTAACACAAAGCAACTTCATTATCAGACTCTGACAAAGTGGCATGATTTTGTGTGTGTGTACATG  
TGTTTACGTACCCGAATATGAAATTTATAACAGCTGCATACATTATTTATGCTTTCTTTCCATATCACTGTC  
AATGTTGTAGCTGATATAATTTCTAAAGCTATATATTTCCGCCAGATGCACGGTTTTTCTTTAAAGGAG  
AGAAGAAAAATGTTTGAATGACAGCTTTTGGTAGGGTGGCTATAATGAATTATGCAAGAATAAAGGACAAAT  
TTCAGGTGGAAAGAAATCGATGCTATCAGTCAGCTTTTCAGTGAGTAGTGTCCCAAACGCTAAGCGTCTTA  
CTCTACTGAAGAACAGAGAGATAAGCTTGGATTTTAAATCCCACGGAAGACTTGTCTGATTTTAGATTGG  
AGGAACCATCGTGCGTGATGGATATCGCTCTGTGGGTATGTGAATTTATTTTTGACCACCGAATTTGGT  
TTCCATCTTGCCATTTATTTACGTTTCTTTAAGTACTCAGCTTCAATAAAGTAGTCGTATAAAACAATG  
CCTTTTCTCGTGTTTTATCGTATTTATATTTAGTCGCTGTTTGTGTATTTATTTTTTAAACGCACAGCCA  
CACAATGGGCTATCGGCGCTCTGTCCACCTCGGAGAACTCGAACCTCGGATTTTAGAGTTTGAAGTCTGTGA  
AATTTACCACCTGACCCACGAGGACTATTTTACTGTTTGGTTATATTAATTTTTTCTTCAGATGCAAT

[illegible]

CACCTGGCCATGCCGGACCCAAAAACATAATTATATAATTACAACCTCCTTTTTTTTTTCTCTTTG  
TTGATGCTCTAACGAAAAATAAAAAAATATCTAATTGAATTCATTTTCCTTGCATAAAAGAAACGCGCT  
TCAAATGATTGAATTTTAAACGAGTTTTCTATTAGCAGATAAATTATATCACTTCAAACAATGAGTGA  
AAATCAATGATCATTTATAGAATAAGCAATTCATCGGTACTTGCTTCAAAAAACAAAGAGAGAGAGAA  
AGCACTGTGAAATAATTACACGAATGTCGTCACTTTGATAGGCATATTTCTTAAAGTTTCGATATTT  
ATCTATTAAAAACAAGTTTCTCTGAAGTGAGCTTAATCATACGGACAAGACACTTAATCTCTTACTTTA  
AATTCATAATGCATACCTAATCCATAGAACTTGTCTATTTTCTCCGCAGGACACAGCGGTATCAACCACT  
TGGGAGGTATCTACGTGAACGGACGGCCGCTACCTGACTCCACACGACAGAAGATCGTAGAACTGGCCCA  
CAGTGGTGCTAGGCCCTGCGACATCTCCAGGATTCTTCAGGTGTCTAACGGTTGCGTCTCCAAGATCCTC  
GGCCGATACTACGAGACCGGGTCCATCCGGCCCCGGGCCATCGGGGGAAGTAAACCCCGTGTGGCAACCC  
CGCCTGTTGTGAACAAAAATCGCCAGTACAAACGAGAGTGTCTCTTCTATCTTTGCTTGGGAGATTCCGGA  
TAGGCTATTATCTGATGGGATCTGTAATAACGACAACGTTCCAAGTGTAAAGTAATACTCAATACGTTAAT  
AGTTTATTGTACAGAGCTGGAACCTTTGAAAAATTATGTTATCAAATTCGGTTCCCTTGCATACGCTGAAC  
CGTTTGGACATTTCTGCTTATCGCTTATCACTACCAACAGATTCAGAGTAATAAATTGAACGATTAGAT  
TTTTTCTCGTTAAAACTAACTGTTTAAATAACTACTAATGCGATACACGCGTATTTTAATAAAAAATCAATT  
GTTATATATCTCGTGACAGCAGTTAGATACACAATAGACGGGTTTCATGAAGATCGACTAAACAGTGAGGT  
TGATATTTATGTTTCATTTATTAATGCTAACATGTTGATATCTGAAAGAACAGGGCGTGCAAATAGTGAA  
AGAGTCTCTTTTATTGTTTATTATTTAATGTTAATGTTGACAAGGTATTTTCACTTTAGTTCAGTATTT  
CATAGAATATTTTAAAAAGCTAATTTCTAACTTACTCAGTAAACGTTGTCGTTTGTAAATGGAGTTTCGA  
GCTATATACGTATATTCATTTTAAATAATTCAATTTATTAATATATACAATAAGCATGTTATTTTTCCCT  
TAAATTTAGCATACGCTAAGTTTATCGGAAAAACCTTTTATATTTCTTTTATTCTTTAATTCACATTA  
ATGAAAGTGTGTAAATAACAGGTACGATAACAGATGTTTCTCGTTTAAATCATATCCAGACGAAACA  
GGCGTTATAAGTTACAATTCATTAATCACCTAATGCTTCTTCCCTATTACACCTTGCCGTTGCAAGAC  
AGAAATATTTCCATTTCAACATTCAGCATATATAAATGTATACATTTCTCTTTCAGTTTATATCTATAG  
TTTTCTAATTGTTTTATATGGTTTTATTCTTTTTGCCCTCCCCCAGTGCACAGCAGTATGTCTACGGACTT  
ACAGTGCTAGAAACCCGGTTTTCGATACCCATGGTGAGCTGAGCACAGATAGCCCATTTGTGTAGCTTTGTA  
CTTAACTACAAACAACTTTTTTCTTTTAAATTTCAAATAACTCCGAGCACTCAATCTCTAAGTCACAT  
CTTAAAGAAAGTCCAATACTTAGTTGTTATTCTACATCGTTTTAAGTTCGACATCAGATAATATATTAAGT  
TTAAAAAAGAGTTTTTCTCTAATTCAGGTGCTTATAGTACTATATATACTATATTATAGTATATC  
TGCTGTAAATGTTAGAACCCCGAACCCCTGGTAATGCAGCAGCATTATATGTTATTGTGCTCTGCAAGT  
ATAACCCCTACCGTATTTTTGTTGGTTGTAGAATTTTTCGAGCAAATCTACTTGAAGGCTATTTTCGCTA  
GCCGCCCTAATTTGTAAGTGATAGACTAAAGGGAAAGCAACCATTCAACACCACCCACAGCCAACCTGGG  
TGCTACTTTTCATCGAGTAGCGGGATAGGGGTTTGACAGTTTCTCTTCTAACGCCCAAAGTGTGTGGCAG  
AATTTTTTTTTTTTGTATTTGGGGGTGGAATGTTGGAAGGGAAGTAACGGGGCGCCAAGCAAAAAAACAAC  
TTAGATCCACAGTCCAGCACACTAACCACTAGGCCACACTTGTCCCCATTTCCGGTACTGTTAGTCATTTT  
TAAATCGTTATGTATCTTTTTTGGGGGGGAGGGGGTAAGACAAGCACTTTACTTATCTCAGTAGCTTTTC  
ATAAAGCCAGGAATTCAAACATTTAATTATTAAGTATTTATTTTCTTTATAAATGTTGAAAAATGATCTTG  
TTTTTAAAGCGCAATCTTACCTAAAGATGAACACACAGCAGATATCTGTATTTATAATGAGCAACTACT  
GATCGAACATACAAAGTTTACGTTGTTTAAATATGAAGCTTTTCAAGAAATGACAAGAGGTTTTGAGGACAG  
GCCAACCACACTTTGAGTCTTTGAAAAGTTTCAAGACAACAAGAATACTAAACGTTGACGACAAAAATGTGT  
CACGTCGAATATTTTTGAGGCTCTTTACAATATCATTAAGGTGCACCACAATAATAAGATACTATTATT  
GTGATTTGATGATAAAGAAATTTCAAGAAATATCTCGTAAAGTATTTTAAATGAATATACTACACATTTTTC  
ACGTCGTGTAATGTAAATGTAAAAATAAATGTTTACCCCTAGTAAATAAACTTGTAGTTGTTTTAG  
CGCAAAGCTACATAATGGGTATATAAATTTACCACTTATCTCCTCGGGGACGAAACGTTGTAAGATATTTGA  
TGATTACACTTTTCACATTTGTGTAAGATACAATCTTATGTAAACAGTTTCATGTACATTTAATTCACGGT  
CACCCCAAGCTGTGATCTTACGTTAGAAAAACGGTTTATTTTAAATGAATATACTACACATTTTTC  
CCAACCTCTCCCGTAGGACAGCGATACGTTTAGGACATTACAACGCTACAATTGTGAGTTCAATTTCCAC  
TGGTGGACACAGCTGATAGATAGCCCATTTATGTTTGTGATTAATATAACAATCGAACCGTTAATCACAT  
TTTTTCACTAAAGCCAATATTGAAAATCTACTCTCTGGCGTAGAAGCCTATTGTATTATTTGATTGCGCGT  
ACCCCTCGCTGTGATATGTATTGAGTGTGCGCTATCTTCAAGGATCATCAACATAGGTTAGTTAGCAAA  
CCAAAGAAATACAGTTTTATACGGTTAGTTCTTACAGATGTAAACAAAAGAATATTTCTGAGATTGAGTG  
ATATTTTTTAGGGTATTTCTCTTAACTAATATTGTAATTCGTATATAACTATATCTTTCTTTTTTTTATAA  
TAATTAAGTCCGTATTTAAATTTTCCGTGCCTACTGAACCTTTCAATTTAGTGTCTTTAATAGCGGAATATA  
GTGAATAGAACAAATATCTTCAAAAAATACAATATATACATTTGTTTTCTAATATAAAGATTAAATTAATACATTCGCT  
TAACGCTCTCTGTATTAATTTCCGACACTTCTGTTATCGAATGAACGAGGCTACATTGGATAGATTATAAA  
ATCAGAGACAGCTGTAATGTAGTTACACAGTAATAACAGTTTTTCAATTTGTTGTAAAGTAACACAGTAAG  
AACATTGATTACAATTTGTTATAAAGTAACACAGTAAGAACATTGATTACAATTTGCTGTAAACAGAACGCAG  
TAAGAATAGCAATATTAATGTGTAAGGATAGTAAGGTGAGTAAAGTCAAGTGTGATAACAGTTGTTTTGAG  
ATAGTAAGGTGAGTATAACAGTTGTTTTTGGAGAACATAGTAATGTGAGTAAACAGTTGTTTTTGGAG  
GAACATATTAATGTGAGTATAACAGTTGTTTTTGGAGAACATATTAATGTGAGTATAACAGTTGTTTT  
TCAGGAACATATTAATGTGAGTATAACAGTTGTTTTTGGAGAACATATTAATGTGAGTATAACAGTTA  
TTTTTGAAGAACATATTAATGTGAGTATAACAGTTGTTTTTGGAGAACATAGTAAGGTGAGTATAACAG  
GTTGTTTTTGGAGAACATATTAATGTGAGTATAACAGTTGTTTTTGGAGAACATATTAATGTGAGTAT  
AACAGTTAGTTTTTGGAGAACATATTAATGTGAGTATAACAGTTGTTTTTGGAGAACATATTAATGTGAG  
GTGATAACAGTTGTTTTTGGAGAACATAGTAAGTCAAGTATAACCTTAACCGACTGCTCAATGTTGTTT  
CTATTCATTAAATTTATATATACTTAACCTAATATACGAACCTATTGAAAGCTGTGAAGACAATAACCGCAAT



[illegible]

[illegible]

[illegible]

TTGGGTGTACTTGGGCAAAGACAGTGGTTTTTACTGTTTACTAGAGGTTATATTTATTTTATTGTAGTTA  
TGACTIONACTACTTGCCTATCGTCCCTAAATTTAACTACTAACCCGAGGAAAGTCAGCCAGGCGGAAGCA  
CCCTTATCACCAACCATCCACGCTAATAGATTAACTGTCACTTTTATAACACACTAATATCTTAAAAATGT  
GAGGGAATTTTTGTGGTACCATCAGGATTCGAACCCGGCTCGCCAGCTCCAAAATCAGAGATCTACCACG  
TGACCTAACATCGATTGTTATTGTTTACCACACCATTTTTGTTTGTGTATAATTCGGACAAAAAACGGTT  
TTATTAGTATATTCAGATAAACATAGATTTTCGTATTTTCATACTTCTTTGTTTTAAAAAATAACTGTGG  
GGATATTATTTTGAATAGCTCATCACACGCGCATGTACTTTTGTGTCAAGTGTGATATCATACCTAATATC  
ATAGTAAACGATGTGCATGAAGAAAATACTTACAAGTATTTTTCAAGAAGCTTTCTGATTTTATGTATC  
TGACTGAAATTCAAAAACGGATTTAATCACAAACAAAAGTTCACCTTGTCTGTTACGTTAACCGTAAAAAAAC  
AAAACGTTAATGATAAGCTGTAGGTAGTATTTAGTACTAAAACCGTTACTGCGCCAGCAGGTGGAGTTTT  
GTTACTTGTAAATGGAATGTAGATTATTGATTTCGTAATTATTAACAAAAATTTACATTTACGAACACCGTAC  
GTTATTATAGAGATTAAAGAAGATCTTTACAGTAAAAACACGTATTTGTTAAGCTAGTAGACTAAACAAG  
AAAAGTTTGGTACCTCTCGCAAGATTTTGTGGCGGAAATACGAGATAATACGGTAAATGTAGCTGAAAAGT  
TGAATAGTTAGAACGATGGATGTGTCTGTAAGAGACACACAGTATTCAGCTTGCATGACGTACACACACA  
CACACACAAAGTAATGGAATTTATTGTAGAAGTACACAGTTGATGCACATACGGGAGTCACAAAACATGA  
CTGATGGTGTACTTATTAATGGTACAATATTTTTTTTCGGAGAAAATACAAAAAAAAGGGAAATACATT  
GTACATTGGTAATTTGTATGCGAGCCCCCTTTGTATCAAAGCACATTACACCTTGTTTTTAACGCTGTCTATA  
CAGATTATCAATGTATCTTGTGGAATACTATTCCAAATGCTCTGTATTACAGTTGAATCCCTCCCAAGT  
ATGAGACATGTTCTTATAGGAATGACATGTTGGAGTAAAATCTGCCTGTACTTGTCAACAGGCAGATTGC  
TATCAATTTTTGTGTAGATCGTATGCTGAGATGCAGCCTCTAACTCATACTGTTCCCCACCATGCTTCACT  
GTAGATGTTGTACATAGATGATACCGATCCCCCTTCTTCGTATCAAATATACGTGCTGTTGGTTGTTGCT  
TGAAATAGTTAGAACATGGATGTGTCTGTAAGAGACACACAGTATTCAGCTTGCATGACGTACGCTGTTGTG  
ATCTATTACCCCCCTTTCAACCTTTTGGATTGGTTACTTTTTGTTATAGTCAGTTTTTCGACACCTTATCAT  
GCAAATATGATTTTACTCTTCTCGAGATAATATTGACACCTCTTTACAGCTGTGTGCTTTACAAAATCTG  
CACTGGACCTCTTGTCTTGTAAATAACGTACCTTAGGATACTTAAACGGCACTTTTTAAAGAATTTTCAGTTT  
TTTACCTCTGTGACTTCTATTATAAAGAGTGCCAATTAATTTGCTCCCATCAGCGTCTTGCATACAAAGC  
CCTAATGAAACATAGTGTGCTGTAATCTCGTGCATACAGTATACTTCATCAACCAAATCTTTGATTTCT  
ACACCTTTTTCTTGCAGTATTTTAGCCCTGGGAAACACTACTGGATAAAACTACTACTACTGGGCATACT  
ATGAGTGCCTCGTACATTTATACGCCTTTTACCGATGTGGCAATTTTGTATTGGCTAGATGACAACCAACC  
ACATGGCAGTTATCAATACCTTGTGTAAGAGTGAATTCGTTTGTGCTGAGCAATAATATGTAATCATGGCCACT  
TCCGTATCATATGGCCTTTAAACTCTTTTTCTACCTTTTCCATAATTATTTTGTTCGCGAGTGAAGTCT  
ACGTGCTTACAACGTTAAAAATCGAGCTTCGATACTTGTGGTGGGCAATGCATAGAGAATTCATTATGTAG  
CTTTGGGCTTAAACAACTTTTAATTACTTTGAAAGATGTAGAGAAGTTTGTCAAGATGTGCGGTCTAAGAC  
TGAAATGATTTTGTGTTCTATTACATGAAATCGTTTGTGCTGAGCAATAATATGTAATCATGGCCACT  
GACAATGGAAGAAGTAGTTCCAATATAGCACGTGATCTGCAATATTATTTATGATTATACGATTAAATTTGT  
AGTGTCAATAATGTTTATAGCACACGTTTTCTTTTTATATTTTTTATCTAAACATTTAAAAATTTGTCTG  
AAAAGCAATAATCGTAAAACTCAGTATGCTAACTTATATTACGTGTAGATTTAGTTAACCAAACCATTAAG  
TATGGCAAAATGACCAATTTCTTTGGGTAGCATGAAATGTATGTAAGTGAACAAATGGAATAATGGTCTT  
AATCGAGAAATTCAGGTCTCAGTGTGCTGGCTTGGCAACAGTCTAGAAAAACCACAAAATATAGCACAGGTA  
ACGTTTTTTTTGGTATTTTACATATCTTCTAGAGATACTGATCCAGAATGATGCCGCCTTGGCATTTTTGAG  
GAAATTTAAATATCCAAGATGGGTACCGCGAAATACAAAAGGCAGTATATTGGATCCAATATAATATAG  
GAAATGATTTTGTGTTCTATTACATGAAATCGTTTGTGCTGAGCAATAATTTCAATTTCATGCAATATATAG  
GAAATGCTGCTTTGGTATCTTTGGGGAAGCTGTCAAGTGTGATTCTGATACAGTTTTTTGACACAAAACTT  
ATTCGCTCAAGAAATCACAGACTTGTATGATTTTCGCGTGACGTAGATGTGTTGAATGTGTTATATCATGAAT  
TGACACCTTACTCATTTCAATATTTGGGGACAGTAGGGACATGAGGATAACCAAACACAGTCAAAAAGA  
AAACTTCAGGTAGACGAGCTATGAGCTCTGGAGAAACAGAAATAACACAGGCCTGAAATGGTCTTATA  
TTGTCTTGAATTTGTACGTGTTCTACAGTAATTCCTGTAATCCAAAATGCTATCAATTTTTCTCCATCA  
CGTACAGAGTTTTTACATAAAGTCATAACGCAATACATAAAGAAAGATCACAAACACGTAGTTTTGAGAC  
TGAAAGACATAAAATTCACAAAAAATCAAGATGAATGAGGATGCATATTCGTTTGACATCAGTGTCTTA  
CCATTTTTATTCTCTTTATTTGTATTTTTTGTAAACAAACATAAATTATAAAAAAATGTTGTTGTAGTAAGC  
GAAATAATAATTTGATCTAAGTAAGAGTTTTTTCTTCTTTCCGATTTGTAAAAAATCCTTACGTGATAGA  
AAAAAATAATATCATTTTCGATATCTTTCGTAGCTGAATTATGAAAAATCCGTTATTAAAAACCAAACAA  
CTTTTATGAAGTTTATATTCGAGGCCTGTGTAATTATCATTGACGGGTGTGCTATTTTTTGGTTTATCA  
ACTGGCCTTGAACGATACAGTTCAAGACTCTTTGGGATAAATCTGGAGATAAACTAAGTAAACTATGTG  
TCACGGAAAAACCAACTCATTGACATCACCTAGAAATAATATCTTAGCTAATATATGAGCTATGCTATG  
ATCAAAATTCATGTTGCAGCCGCCATCTTGAATATTTTAATTCATCGAGGGTACCGAGGTGACATCATTC  
ACATCCTTATATATATAAAAAACGCCAAAAAACATTACGTGGACTGTACTTTTGGGTTTCGGGCTAGAATC  
AGGATTTGGCAATCCGATATATTTTATCTGAGAATAATGTCAATCTATGGATTAAATTAACCTTATACA  
TTTTTCTGTAATCTGTTTTTTTTCTGATTCTGCTCCCTTGGTGGCTCAGCAGCAAGCTTTTCGGGCTTAAATC  
ACTAAAAATTTGTGTTCAATCCTTTTTCTTTTTGACAGCTCAGATAACTCATTTGTTTTAGCTTTGTGCTT  
AACAACAAAAATAATCAAAACAACTTTCTGAAGAAGATGAATTTCTATAGTGTACATATATGTTTCCCT  
TCAAAATACCGAGAAACAGTTTCAATCCTTACATGCTTCAACTACAATAACGTTATTTTTTTCAGGTTTATACG  
AATGTATGAACCTCTGGGTTGTTTTTGTCTATCAGTAGCAAAAGGCTTAGATTAAATTCATTTTCACTAAAAT  
ACTTTGAAATATATTTGGAATCCATGCGAGATACATAAAAAACATTACATAGGAAATGCATCAGTCTCG  
TCCCTTATATTTTTTCTATACTTTTGGACTTATAGCATATTGTTTGAATGTGTATCATATACGTATATAA  
CGACATTGTACAGTTTTTGTATTAATGCCATTTTTTGTGAATTAAGTACCTATAATTAATCTATTGTCT

TTAGACATTATTTCGTAGTCTTGGTAGTAAATAATATAAAATACACACCATTCAATTTTAGTTTCAGTAGGTTAT  
ATTGAAACAAATTTTGAATAAGCAAATTTAGCAAGTCATAGCCGAGTATAGCCGTCGTGGAAACAGGATGTA  
TCAGAAAGTATATTTTGACACATTTTGGCGGTACGTAGGTAATTTGTGTGATGCCACCAATAATTTGATTACTTT  
TAGGAAGGGTATGTGAACAGCCCTTTTGTGACGCAAAATATTTATACACTCAGATCATAAAGGTGTGTTTCAT  
TCGGGGATTTTATAAATTTCCAAGACAGGAATATCCCTTCTTCTTAATTTCCATTGGAAAAACAAACGAATACG  
AACCAACTTTCGCGGCACCAAGAACATACAGAAAGAGATCTGCAACAAGTCGTTATCCAGCAGTGGTATAAAG  
CAAAGCGGGCGCTTTGAAACAGGTGAGACTCCAGCAACACAGAGGTCAGCGGCAAAAGCCGTCCACGTGC  
TCTGAACAACACTGCACGACATATCAACAAGGATCTACGTCTGAAAAAGTGACACAAATCACGCGTACATA  
TAAGTTTTTTTCTACGACATATCTCAAGCAACTGGAGAATGAAACGGATATTTCATGCTATTTTATAAGAAG  
ACATATTCGTCAGTTCGCGCAGACAGATACCTATGGATTTCTGTGCAATTTGGACTGTTTAAATGGGTGCTC  
GCAAAACCGTCATCTCTTGTAATACTAGATGGGTATGAAATCAAGCAGGAAGCGGTAGTATGCTTTTGGGT  
GTGACAACCTTATGCTGTATGCTTTTGTCAATGGAAATAACATTGCGAACTATTGTCAAGATGCACGTTT  
ATCATATATGTAGTATGAACGGATGTAGCGACGTGGTGC GGCTCAAAGATCGTTTAAATATAACGTATATA  
CCTCAACTTCGGTTATAATGCTGCAATTTCTGTTTGTTTTTAAGAGTTTACATTTCTTTTCCATTCGGT  
TAGGTTTTCTGGCTAATTTTTCGATGAAAGAATTGTGTTGTTGTTTATTATTACTAAGCTACACAAGGGCT  
ATCTGTGCACTGCACACCCGGGTATCGAAACCTGGTTTCTAGCGGTATAAGTACGCAACATACCAATG  
TGCCACTGGGAGGACAAAAAGAATTGTGCAAAACATCAAAGTGATCTATAAATTCGGTTGGTCACATCT  
GAGTAATTTATCAATTTGTGAAATATGTATCGCTAAAGAATATACGTTAGAAGCTGTAACCAATTTGTAATAC  
ATGATCATTTTGTATATATATATATATATGTGTGAAAGTATATATTGAAAGCATTAAATAAGGTTTGACT  
GTGCCAGTAAAAATATCAAGAGTGTACATAAAAGGCTTTTCAACTGTCAAAAACAGAATTTGCAATTTTACA  
TGAAAAAACTTTTACTTCACAAAAGGAAGCTTTAGTTTTTGGTTTAAATATGCTATTAATGAAAAATAGG  
AATTTAATAGTTGAAACTATGAAACTATAGCTTTGAAATATAAACTATTTATCTATAGAAATATAAAACT  
TATTTATCTATAGGAAGCTTTTACTTTTGGTTTTAAATATGTTATTACTTGAAATAGGAATTAATAGTTG  
AAATATAGCTTGAAAAATATAAACTATTTATCTATAAAATGAACTATTAGTTGATTTTTCCACAGGAAATTA  
TTATCTTAGTGGTGGAAATTAATTACCTTCTGGAGGAAATAAGTTTGTTTTCCAGTATAAATAATTAGAT  
TAGCATTTGGAACCTTAGTTGACTTTTCTAGCTGGATATTATAAATATTAGCTTAATACCGAGTATTTTGGTTGA  
CTTAGTAGTGAAATTCATTTGGTTTTCTAGTGAAAAATGATTAGTAGTACAAAGTAATTTATCTGGTAGT  
AAATATTTGGTAGTAGGAATAAAAAAGCTTTGCCAAACTAAGCCTGTATAATATAATGGACTCAATTAATA  
AAACAATAAATTTAAACACAGTATGCTCTTAAACTGCGTTAACAAACAATGTACTTATTGTTTGTATTGTTT  
TACACTGTACTTTTACAGTTTTGCTTTATAATCACTGATTTCGACAGATAAATGATTTGTGAAAGGTGCTGTA  
ATTCATATATATATAGTTTTTAATTTCTAAGGTTTCGTAATTTTCAGTATGTTTTTCAACTAATCTACTC  
TAGGCATATTTTTCAGTTTTAAATTTCAAATAATTTTTTACCTTATTCAATTGTTTGTAGCACATCTGTGTCA  
AGTTTTAGATATGATAAAACCCCTAAAAGAGACAGTGAGCACACCTGTGCTCAGGTACAGACATGGCAGACC  
CCTAGGGGTGCAGGAATATCAAGATGACAGTGTCACTCTCTTCCCACCATATTACAGCGGCAGCTTTGCC  
TTCCATCACGCTCCGTCACCTCAGATATGTTATAGTGGCTCAGCTAGATAAGCCAGTACGTTATAGACT  
GTGGGAGAGATGGAAGTTTTTGGGTGGGCTTCAAGCCGTGTCTTGAGAAGATCCACATCAGTCAATAAAT  
GACATCTCTCAGACCGCCTCGACGGAAGCCGGTGCAGGTGGCCAAATAGAGCAATTTGATTATTTTTCC  
ACTAACTGCCCTAAAGCACTGTCAAGGTGGACTCATAAACGTACAAAATCTGATTTCAAGCAACGTTT  
TTCAAAAATTAGTCCCATATTATCTGGTGTCTAGCCATGACGGCTAGGAGAGCCATCAGAGAGAGAAAGA  
GAGGAGATCAGACATCGTTTTTTTGACAAGAGGATAGTCCCTTTTTCATCCCTAGCTATACAAACCACCGCT  
CGGCACGTTGGTGGTCGCAACTGTAGTGAATACATATTCATAGTATTTTCCACACCGCTGGTTTTGACAAAA  
AAGTTTTCAATATCATCGCCATTTTAAATCCATCAAAAAGAGCCAGATCTGATAAACCTGCGGTTTTT  
ACAGTAAACTCAACATCAGATATCTGCGGTAAATAGGTTATACAATTATGAAAAGCGTAATGTGTATAG  
CAAATGAGCAAATCATTCTGATTATAATTAATAAAGTCTGACCTTAAGTTGTTGTTTTTGTGATGGCTG  
GTGAACCTGATGAAGGGTGGCAGTGTACAAAAACAACGTTTTTGTAAAAGATCATTGAAATTTATAACGTAC  
TACAGAATTATATCACTTAGAACGTTTCAAAACATATATGAGAACAGATGATTCTGTTTATACATATATA  
TTTTATTAAACTGTCTTTAACTTAAAGAAAAAACCGCGAAAGGACGCGTTTTCTAATTTAGTAAATTTT  
TGTAGGTGTTTTTACAACAACTATTTCAGAGGAGTTCAAATTCAAATTACTCAAATTATACTTTCAACATT  
GTGTATAGAAATGCATACGTTTATGTTATGGATATATTAACCTGTCTCTAAATCAGTTTATCGACAAATTC  
TAACTTTTTTCTTTAATTTGTGTACCCAGTATGATCATCTTCAAATATCTTTACTACATCTGCAGTGC  
CAATCTTTCGAACAAATAGTAACAATGATTTAAAGCAATTTTTTTTCTTTGAGCTTGAAGCTATAGACTGC  
TAAATGATCAAATTCGAGCATATACTTAATAAACCAAGCTTAATGAAAACCTTATGCTACATCATGCA  
TAAGTAAATAAGTAAACCTTTTCAAGTTATTTTGGCTGGAACGTTGAGCATGGTTTTATTTTTATCTCTAA  
CTTTATTAATCTACTCTTTTAAAGTATTTTATTTGTCATGAATATAAATATACATGTTTACTATTGTT  
TTCAATATTTTGTAGAGGTAAATTACTTTGTTTTAGAGGTACGTTAATTTGTTTTAGAGGTAAATTA  
TTGTTTTAGAGGTAAATTACTTTGTTTTGGAGGTAAATTACTTTGTTTTAGAGGTAAATTACTTTTGT  
TTCAAATCTAGATCCCAATTTAATTTCTCAATTTCTGGTACATATGAGTCAAATTTAGCTTTGTATTAGG  
ACAAGTACAGTAGCTACCTATTTAATTTCTTCCACTTATTTTATTTATGATTTACATTTATGACTTTACTTACCA  
GTCATTTTCTGTTAAACCGCCCTGTAGTCACGGAGTATCTCGCAGGCGCCTGGCCTCTTTTTAACTCTTCC  
TTAATGGCGGCCATTTTTATGGAATCCAGTTTAGAAAAGTTCAACTGAGTTAGGTTACATTATGATTGTC  
TTTGAAGTAAACAGTTTTCTTCATCCAGTACATAAATAAAAAGTCTGAGTACGAGCTTGCTTCTAAC  
CTTACTTGTGTATTTTTCAGCTTCTCTCAGACAGAAATATATTTGTACACATATCAATCAAACTGTTCC  
AAAAAATCTAAACAAATGGGGCCAGAAGATCATCTGAGAAAAGTATATAAATTCAAATATCTAGTCTTAA  
CGAAATAAATTTTGTCTCAAACCTCAAACCATAAGGAGAAATCACGCCATCCATCGTGTACTTAGTGCTT  
GATATGTTGGACCTACTACCCCTATCTCTCTGTGTTGATTAACTTCGCGCAACAGAAAGTAAAGGCG  
GGAGCAACAAGTAGCTAATTTAGACACACCTACTCTCTGAATATGACATCTGTAGATTAGAGACATG  
CATATTGAAATAACAGTTTGTATCAGATATTAGAAACATCGACCAATATTTTAAAAAGTCCGTTATTATG  
ATTTATTAATTAAGTTTTTTTCTCCATTTTCATGGATCTTCTTATAAGAAGTACGAAATTTCTTATGAATGAT  
TTTTAACTTTGTTTTTGGCAAAATACATGAATGATTAACTTTTACTGTGCTGCCATCTACTGCTTTAT  
TAGTAAACCATCGTCAGTAGGGCAAAATATGATTTGCTCCCAATTTCTAAATTAATTTGGCTAAATTTAT

TCACGTATTTATTCTGCACCAACAGTCTTGTTTGTACTGAAAAATAAAATATAAAATTTAAACCATTCTT  
AACATTATAGTGTCTTGAAAAATTTCTATTAGATTAGTACTAAATTTACTTCATTAGCTTACTTCACCA  
TTCAATTACTCTTTGTCATCTGATTAAAAATTTAAATTTATTTTTTGTCTTGTTCGGTTCAACATTATATGAA  
ACTTTCAGCACTACTTCGAACCTGTAGTCCCCAGTGGCACAGCGTTATGTCTGCGGACTTACAATACTAG  
AATCCGGGTTTCGATACCCGTGGTGGGCAGAGCACAGATAGCCCATTTGTGTAGCTTTTATGCTTAATTACA  
AACAATCGAACCTGTAGCTAATTTAAATAAGAGTAAATATAAGTGTAAATTTACTCGCTGTAGATGTACTAAT  
ATGTTTGTGTGTGCAATTGATGAAACCATTAAAAATATTATATATATATATTTAACATATTGAACTAAAT  
GTGTTAATATAATTACAATTAAATATTTCCCTTTTTTTGTATTACTGAAACCAAATTTACATTTACAGTA  
CCTTTACACTTTTGCTTTATTGTCATATAAAAGACGGTTTCATATAAAATTTGGATATATATATATATATACT  
CTCAACATTTTATTTGGCACCATTGTGTTTCAGACCAAACCGAACAAAAAGTTTTGAAATAGCCGAACCT  
TCTTCACCAGACTTTAGCCATTAGTAATGATGCTGTGAATCTAGATTAATGTACGTTATTACGAGAGATT  
ATACGCTGGTCATTATTTAGCCATTAAAGAGAATATGATGAATGATGCATGTGTGCGCGCATTTGTCTACGC  
AAGACTTTCTCCAATATGCCTAACACTTTAACGTGTTAGGATATGTTTGGTAGATACCCCTAAAAATGTGC  
AATAGACTTTTCAATTTGTCTTTTAAATAAAGTCTTTAAATATATATATATATATATATATATATATATAC  
AGAAATAATAGGTCTCTAGCACATCTGTAGAAGTGGTTTCTTGACAACATTTTCCATGTAGAAAAATACAC  
TGTTAATACATACTGTAATGGCAACGAAATAGATCAGACCAAAGATATTGATTTTATTGTGTAAGATGAT  
CTTGCTATTGTGTCTCTACTGAACTAAAAACAACAACAACAACAAACAGTTATGATACATCAGATTGCAA  
TTATTTTTTCACTTCAATTTGTCTTTTAAATAAAGTCTTTTAAATATATATATATATATATATATATATAT  
TTTTAATTAACCTTAAACGTAATGGTGTTCATAATATGTAAATTTTGGTTCGTTTCGGAAGAAAAAGTATAT  
AGTATAATCCACCATGAATACTGTGTGTAGCTAAGTTTAGTGCCCTATTTATTATACGCTAATTAATACA  
CAGTTTAAACCCACCATGAACATTGTGTGTAACTAACTTTACTGACCTATTTATTATACGCTAATTAATAC  
ACAGTTTAAACCCACCATGAACATTGTGTGTAACTAACTTTACTGACCTATTTATTATATACGCTAATTAATAC  
CACTGTGTAACTGACCATGAACATCGTGTGTAGCTACTTTGTACATAGTGTGATTCCACCATGAACGTTGT  
GTGTAGCTAAATTTAGTGAAATATTTATTATACACTAATTTTCTCGTTTTCTGTGTATGTGTCCAATCAG  
ATTGAGGATACTATAATTTGTCTATTCTAAAGATAAGCTAGACGCTCTCAGGAAATGCAATTTCAACACTTGG  
CGATGATAAAAAAGAGTAGGATGATAGAATACATGACCAAAGATGATGCCTTTTCTTTTCAATTAACCCAAAT  
CAAACAGTCCGGGCCATGGATAAAGTTGGTGTGTTTGTGAACGTTTTGAAATTAACAGTTTGTCTTGCT  
AACACACGACAAAACCTTTAAAAAGTTATAAAGCTGGATTATCCAGTAATATGATTCAATTTGTGAATAATA  
GAAAAAGGGAATATATTTAAAAAGTTTATTTCTAATTTCTCACATGGTGTAAATGCAGTATTATTTATTGT  
GTTGGATGCCCTTATGCTACATTTTCAGTCCCCTCTCTTTTGTGAAGCATTATTTATTGTGTTGGATGCCCTTA  
CGCCACATTTTACTCTCGTCTCTTTTGTGAAGCAATATCTATTGTGTTGGATGCCCTTATGCCACATTTTCAG  
TCCCCTCTCTTTTGTGAAGCAATATCTATTGTGNNNNNNNNNNNNNNNNNNNNNNNNNNNNNNNNNNNNNN  
NNNNNNNNNNNACTTGTACAGGTAGTGAGAATGATTAGAGAGTCAGAGAAATGTACGTTTGCCTTGAGGC  
GTCAACCTGAGCTTGTACAGGTAGTGAGAATGATTAGAGAGTCAGAGAAATGTACGTTTGCCTTGAGGCGT  
CACCTTTACTTGTACAGGTAGTGAGAATGATTAGAGAGTCAGAGAAATGTACGTTTGCCTTGAGGCGTCA  
CCCTGACTTGTACAGGTAGTGAGAATGATTAGAGAGTCAGAGAAATGTACGTTTACCTTGAGGCGTCACC  
CTTACTTGTACAGGTAGTGAGAATGATTAGAGAGTCAGAGAAATGTACGTTTACCTTGATGCGTCACCTT  
GACTTGTACAGGTAGTGAGAATGATTAGAGAGTCAGAGAAATGAACATTTATCTTGAGGCGTCACCTGTA  
CTTGTACAGGTAGTGAGAATGATTAGAGAGTCAGAGAAATGAACATTTACCTTGAGGCATCAACCTGACT  
TGTACTGCTACATTTTCAGTCTCGTCTCTTTGGTAAGCATTATTTATTGTGTTGGATGCCCTTATGCCACAC  
TTTCAGTCCGCTCTCTTTTGTGAAGCAATATTTATTGTGTTGGATGCCCTTATGGCACATTTTCAGTCTCGTCT  
CTTTGGTGAAGCATTATTTATTGTGTTGGATGCCCTTATGGCACATTTTCAGTATCGTCTCTTTTGGAT  
TATTTATTGTGTTGGATGCCCTTATGCCACACTTCAGTCCGCTCTCTTTTGTGAAGCAATATTTATTTTGT  
GGATGCCCTTATGCCACATTTTTCAGTATCGTCTTTTTTATAGCTTCCCATAGCGCTCTCAATACGTCTCAT  
TGCGATGTTTTGAGTAGAAGTTAATGCAACAAATAGTGTTACACACCCGTTAAATGTAAATATTTTTGCA  
AAGCTCAATTTGATCTGTAAAGTTTCATAGTAACGAGTAACTGACGAGTAACTTAAGTATGCTTTTAAATCCGATATGTC  
CAAATTAAGAGACTATTAGACTTTCTCACGTTAAAAATATTTAAGCGTGAGGATAATCCATAAAAAATTC  
TAATATTTTTTAAATAAAATAAATTTCTAAAAGATTATTTGATTGATATTGGGTGTTGCTATTGTCATGCATT  
GTTTATAAGCTTCATTATTTCAAATTGATTTTAAAGAGCTTCTACGAAATATTGGCATCTACATAAAAGAA  
ATCTTTTACAGAAATGTGATTAACATTATGAAAACCTGATCATCTCATATCAGTCTTTAGCGGATCAAAAAGAA  
GGCCATTAAACAAGGCCTCTAGAGTTATACACATTGCAGTAAAGAGTAGTTGAATGTGAAAGTTCTTCGTG  
GTTTTTCATAAAATTTGAACGATCTTTCAACCCGGTAAAAAGATCCCATGTGAGTCTGGTATGTAATCCACC  
ATGAACATTGTGTGTAGCTAAGTTTACTGATCTTTATATTATACGTTGATTTGTACACGGTGTAAATCCAC  
CATTAACATTGTGTGTTATGTGTGTGCGGTGTAAGCAGTGAACAGCACGCTGTATACTGAATACACATTCAGTA  
TGTTAACGTGAATACTGGAAATGTTTTATAACCTAGGAGTGAAGCTGAAAACGACAAATAACATATATCG  
ATTTTACTGATGCAAAGTACGTTGATATACGTTCTCTCTCTCTCTCTATGAACCGGAAGGTTCTTGTTA  
TAAATAATGAGAAAAATTTAGGCAACTTTCCACGGTTTAGGTTTTCTGTCAAAATGTTTTGTACGTTTGA  
AAGCTCATTTTGATCTGTAAAGTTTCATAGTAACGAGTGAACAGCACGCTGTATACTGAATACACATTCAGTA  
TCTCTTAGCAATGAACATTGAAAGGTGAGAATGATTAATTAGTTTCGCTTAAAGCATTGTATTAAAAAT  
ATGTGTTTTTACAACAAGACAATTACCTCAATATTAGCACAAATAAAATAATTGTTAGTTTGATAGATGTGC  
TTCATAAGGCATTTTATTTTCTGAAATTTGGGATTTTCTGACATTTAGTAATATTAAATATGACGCTTTA  
AGTCGGATTTCTTCTACGGTTCTATATATATTGTTGGGACTTCTAATAAAAGAGAAGGGATCTGATATAA  
ATATCATTTTCATGATATTTAAGTTTTCATTGAAATTCATCCAATATCATAAGTAATCCTAAACAAGGTCGT  
TACGTTGAAAGTGACCTGTTTCGTACACACTAATCAGTATACTGTTAGTCCACCATAACCACTGTGTGTA  
GCTAAGTTTACTGACCTATTTATTACACGCTAATTAGTACACTGTGTAATACAACACGAGCATTGTGTGT  
ATGTGTGTGAAATGTAAAGCTTATTATGAGTACTTCTAATGGAACTCCGCCACCTCTCTTCCAACTTATT  
GACCAAGAAGGATTTTGCAAAGTAAATCTTCTTTCGTGAGTGGAGAAATGTGAATGAGTGAGAAGTATGC  
AAGTTGCTTGTGTTTTCCAAATATTGAATGACCAAGTTGTATTTTATCTTCTGTTACGATCCTGCTTGT  
CCAAATATCGAATGATCAAGTTGTATTTTATCTTCTGTTTCGATCCTGCTTGTGTTTTCCAAATATCGAATG  
ATCAAGTTGTATTTTATCTTCTGTTACGATCCTGCTTGTGTTTCCAAATATCGAATGATCAAGTTGTATTT

TATCTTCTGTTTACGATCCTGCTTGTGTTTTCCAAATATCGAATGATCAAGTTGTATTTTATCTTCTGTTTTCG  
ATCCTGCTTGTGTTTTCCAAATATCGAATGATCAAGTTGTATTTTATCTTCTGTTTACGATCCTGCTTGTGTTTT  
CCAAATATTGAATGACCAAGTTGTATTTTATCTTCTGTTGCGATCCTGCTTGTGTTTTCCAAATATCGAATG  
ATCAAGTTGTATTTTATCTTCTGTTTGTATCCTGCTTGTGTTTTCCAAATATCGAATGATCAAGTTGTATTT  
TATCTTCTGTTTTCGATCCTGCTTGTGTTTTCCAAACATTGTTAATAATTCACCAAAGGAATTAGCTTTGCCA  
CAATCTACCCCTTGTATAATTTAATCGATGACCTGTATTAATTCACCTTTTATATTAATAACCTACGTCG  
CAATATCTATGGACATAAAATAATCACAGTTGATGCCAGGATCTTCAACCTTTCTCTGAAGTACACCTGAT  
TTGGCTTTTACAAAAGTATGGAAGCATGAAAACCGGCACATCTTACACCAGCGAAAGCAGCACCATTTC  
AGCAAATAAACAGTTTGGGAGACTTCACATATTTTGAACATAATATTTGAAGCCAGAACATTTCCCAT  
GCACCTTCTCCAAGTTGCCAAGAAACCTAAACCCACAAAATTCACCTCTCTATCAGAGTTTTTGAAAGAAG  
AAAAAGTCTTCCCATCTCACTTTTTTGACAAAGATTTTCAAACAACCATATGTGTATTTCGAGATAGTAGAA  
ATTATTAATCAGGTACGAATATGCATAAGTAACTTAGTTGCTGTATTATGATAACCGAGGTGACAAAATT  
GTCCAAGTACATAATTCATACGCTCACGTATTAGCTTCCAAAGTGTAAGAAACGAGATCAAAATATTAT  
GTAGGATGAAAAGGCATGATAACCATGTGTAGATGATGATGATGATGATGATGATGATGATGATGATGATGAT  
ATCCATCTTCAGCATCTGGATCTAGTAAAATTTAAACAAAAGTAACATAGTAACTAATGAAATCAACTAAA  
AATTAATAAATACCGTACTACCCAGTTCTAGTAAACTAAAAATTAATAAATACGGTACTACCCAGTTCTA  
GTAAACTAAAAAGTTGAAAAGATACGGTAGTACCCGGTTCTAGTAAACTAAAAGGTAAGAGATATGGTAGTA  
CCCCGGTTCTAGTAAACTGAGAGTTGAGAGTTGAGAGTTGAGAGTTGAGAGTTGAGAGTTGAGAGTTGAGAG  
TATGGTAGTACCCGATCTAGTGAAGTTAACTAAACGTTTGCAGAGGTACAGTATTATCCGGATTGTTGTA  
AGTTACAGATATACGATGGTGCCCGGTTCTAGTAAACCAAAGGTGAGAGATATGGTAGTATTATATATG  
TATTAATCTAAGTAACTAAACAGAGTTACGATAGTGCCCGCATCCATACCTTCAAATATAACATAAGTA  
GTACCCGGTTCTAGTAAACTGAGAGTTGAGAGTTGAGAGTTGAGAGTTGAGAGTTGAGAGTTGAGAGTTGAGAG  
TAACAGAGTTACGATAGTGCCCGCATCCATACCTTCAAATATAACATAAGATGACTCTGTACCTGGAGTTA  
GTAAGGTAAAGTGAATATTAATGATATGTTAAATAGCAAACAAAACGTTTCTAAATAATCTCTCCAAGC  
AAATTTAAAGAGAAATATGTTGTGAGACTAAAAACCTGCCGTAATCTTTTGTGTTGTACACATGTGAGTGT  
GTGTGCTTAGATATTTATATATAGTCATATATATAATCTAACTTGCAATTAGGAAATTTTAAATGTTTGGAG  
GAATATTAAATTTATTTCTTACACGAACATACATAAATGTGTACAGAATAAATATATGTCTAATATTT  
ACGTTGATTATAATTTGTGAGGAAATATATAGTTTTTTTTTTTCAATTTATAACATAGTTTAGTTTCTAAAC  
AACAACAATAATTTAAATTTGGCTTCAGTTGTCTTCGTAATTTGTTTCTTAGTACCACTGTATACTAACTAT  
GGCCCGCTGTATAACCTTTGGTACTAACTATGGCCACCCTGTATAACCATTTGGGCTATCTTCTTTTA  
TTTGGTATTTAAATTTGAAAAAACCTATGTGTATAGCAGCTATTGTTTTATCTTGTACCTTTCATCAAAACAC  
TTAAAAACTATATCTAGGAAGTCGTACTATGATCATAATGTTGTCAATATATATATATATATCTATTTAT  
GTATATGCATTATAAACATTTATATTTGTGTTAATTTGAAGGAAGTATGGCGTATATATCAAAATAATTT  
TCCAGTCTAAAGTAAATTTAGTATATATGTTGATGTTGATGTTGATGTTGATGTTGATGTTGATGTTGATGTT  
TGTGTATTTATAGTTTTAATTAATGAAATTACTAGATTGAATTACTGAAGTCAAACATGTTTATATTCAT  
TGTAACCTTCGATTTGGTTACTTTTTTTTTTAAAGTAACTGTTATTTAGCTGTATCTGACTCGCTCTCG  
ATTGTGTAAAAACAGGAGACGGCTGTACTGTTACATTTATATGAGGGGAGAGCTATAGACAGAATAACAAC  
TATGTTGTTTAACTTAACTTCTTACAAACCTAGTAATGACACAAAATATGTACACGAAAAGCTTCAACCG  
TTCTATAACTTTTTAACGAAACAATTAGAAACAATTTGAAACGATGGTACACGCACTGAAACGATTGGA  
AACAATTTGAAACAATGATACACGCACTGAAACCATTTGAAAGGATCTGAAATCAAGGTTCAAGATT  
AGCAGCAAAAAACAGATGATTACAGCTCATTTACAGCTGTTTTCGTATAGTACTCATATTTTGAATGAACCTT  
TATTTTCTAAATTTCCCGCGCTGATGCGCTATCTTTAAGTTTTCCGAGCGTAACAATTGAAACTTTGTAGCA  
TTCGTAGTATCACTTTCTAGTATTTCACTGACAAAAACTATAAGATCATGTTTGTAAAGTACTTAACATT  
TTTTACTCAACACATTGATTTTTGTTTTTTAAACACATTCTCTTAATACGCTGAAATAATTTTCTCGGGT  
AGTTTTTGTCTAAGAGAGTTAATCACAAATGTGGAGATATCGGCTGCTATGGTTAACGTATTCCTTCTCGAC  
CCGTATCTAAATTTCCCGCGCTGATGCGCTATCTTTAAGTTTTCCGAGCGTAACAATTGAAACTTTGTAGCA  
AGAACTTCAATAGAAAAATAAACAGAAATAATTGATGTGCTACACATTGGAGAGGGGGAAGTATTGCTT  
AATTCTGTTTTCGGAATCATTTAGATGTGTGCGGCTAATTTTTAACTTGTGTGTATTATCTGTAAAGAAA  
AGCATGAAACTTTTACACCAGTGTTATTCTTGCATAGACTTAAGCTCAAACATTTTATGTGAATTTA  
CATAAATCAAAACATTAACATCGAGTTACACATAACATTGCTATATTTTATAAACAAGTGACACAATCGGG  
CTTCATTTTTGTGTATAACGTAACCAAGTTTGTTTACAACCTGTTATGCCTGATGAAATACCTTATGTTGT  
ACTAATTTTTTTTATTTGTCTATCATTTGATGTGCTAGATGACACAATTTTCTTTAGTGTCTATATATATG  
TATGCGTGAGAGTGTACGTTGTGTAGATTTCTGAAAAAGAACATGCAATTTATTTTACAAAAATATCCT  
CTTGAAATGTTTATGAAAAATAGGCATCACTAAAAAAGTAATAACGAATGAAACAAGCATACCGGAAAGAT  
TATCTTTATTGCCGTAAATAAATCATTTATACATTTAACAGAGGGCGACAGTGGAAACCGAGAGTTCCAGC  
CGAAGTGACCTTGGCGGAAGCGGGGATGAGGATAACGCAGCACGGCTCCGGTTAAAAAGAAAGCTACAGA  
GAAATCGAAGCTCATCTACCCAGAGCAGATTGAAGCTTTAGAAAAAGGTGAGAAATCAGAAGATAAGTG  
GGGAAATTTGTTTATCTGTAACCAAGATTACGATTAACCTAATATATGATATATTAGTGAATGATGATTTCT  
CTCACGCACAAAAACCAATAACAACTACATCAGTTATATTTCGGAATTAGCTGCATCAATTTATAATAGC  
CATATAAACTATTGATTTTATTTTATCATCGATGTAATTTTACGAAACATTTCACTTTGCTAACTTTACG  
TCCAGTTTATAAAATCCAAATCGCTTCACTTTGCCATAGTTTGTATACATCCTTTAAAGCCGTTTCACTT  
TACTGGTTTTTATAAATCTTGATTTATAACTCCAACTGCTTAATTTCTCTTTCCAATATGATGATGATTTT  
TATAAATCACGTTTAGTTTGTGTTTGAATTTGCGGAAAGCTATCTGAGCTAACCGTCCCTAATTTAGCAG  
TGAAAGACTAGAGGAAGGAAGCTAGTCATCACCACCAACTCTTGGGCTACTATTTTACCAACGAATAGT  
GGGATTGGCCGTCACATTATAACGCACCCACGGCTGAAAGAGCCAGCATGTTTGGTGTGATGGGGATTG  
AACCCGCGACCTCATATTGCGAGTCAAGCGCCAAACACCTGGCCATGCCATGCTTTATATGGTGTGT

[illegible]



ATTAATATTCTTTCAAAACTGTACTTGTGCAACATATTTTTTCTGTTCCAATTTAGGTCTGATATCGCC  
AGGACTCTCTGTCCCAAGTCCCAGGCCAGACTGGTGAACATAATATGTCCTCTGCCTATTGGCCA  
AGAATTTCAGTGCATTGGGAGCGTCAGAAGCACGTATAGACAGGAAAAACGAAAACTAGCTTTTGACGCCC  
TTAACGTATTTAACCATAAAAAAGAGTCTTTATTAAGTGTGGTGAATATAAATATACAGTTTATTA  
AAACCTGAAAGAAAAACAAAAATTAACACCATGAACAGACTATTCTTCTGAGGAAGCTGTGAAGCTCTAG  
GGTTTCATCCTTTTATATTACGTGTATCAACATCTGTAGTTCTAACAAAACTATCTTAATGTAATGTTA  
TCGAAAAGCACTTGGTCAATTCGGTTTACTACCAAGAAATATCACGTAATGATAAATCTCGTGACATCAA  
ATTTAGTCTAACTTTATACATTACAGAAGTCTTTAGCCATTGAAAATGTGAATATCTGACATTTCCCT  
GACTTTTATCTAGTCTTCCGGTTTATTAGTTATTACAATTGCATGTTTGTACTATAGCTCTTTTTGTGCT  
ACAGTTTGTATAACTGAGTCTTTTAAATGTGTATTTGTTACAAGGTGTGGAAGATTTGATTGGTGTAAT  
TTTGTCCATAAAATGTTACTTTTTGAAAATGGAGAAATATGCAACATTTTTTTTTCTTTCCATACAAATCAC  
TGTCTTTTAAACAAATATGTATAACTAATATTAGAAATTTTATGAACAAGCCTTACAATATTTAAGATAC  
GATCTTTTTTTTTTAGATTTGAAACGGTTATGTTTAAAGTACAGACTGATTTTGAGATCATTTTCTGACG  
AGATCGTTATTATTTACTCTTTTACACAGATGCCTCCAAAACCTTAACTAGTGTTCATCCTTGTGTTAA  
AAAACAAACAAAAACAGACAATAATTTCCAATAAGAAATAGATAATTTAACTTACTGTTTCAATAATATT  
GGCGTTGTTGAACCGTCGCCATTTAACTCTCTCTTATGTTATAAAGATGATTAGATTAAATCCGTAAAGT  
TTATTGAAATCGTGTGTTTCGTTGTTGTTGGTAAAGCTGCTTTGCCTCTTCTGTACTTGATATTTTACGCT  
GTAACAAACGGGTAAGCACTAAAGATGTGCTGGGTAGAATACTCTCTTTTCAAGTGAAGGTGTGTTCTT  
TAGAAGTCAAAATCATATTAACATAACGACATTCAAACACCTCTCGTGACAATTTGAAGCACTAATGTCCGA  
TCGTCTCTTTAAATAAATATTTTGTGTTAGATAAGACCTTAGATTCTTCCCTCAGTTATCCTTATAAAAAAG  
ATAACCTTGAAATTTTCCCCCTGATTTAAAAAAGAGAGAAAAAAGAGAAATCGTGAGAAATAATTTGG  
TTTACTTGTCTGCACTCTCTTTTCAAGTTGAGGAGGATGTTCTTTTGTGCAATTTTACCTGCTGCACTCTCT  
TTGTTTCAATTTTTTACCCATAGTACTCTCTTTTCAAGTTGAGGAGGATGTTCTTTTGTGCAATTTTTTACCTGC  
TGCACTCTCTTTTCAAGTTGAGGGGGGGGTTTCTTTGTTCAATTTCTTACCCGCAGTACTCTCTTTTCAAGTTGA  
AGGGGTGCTCTCTTTTGTTCCTTTCTTACCTGTAGTACCATCTTTTAGTTGAGGGGTTTCTTTTGTGCAATTT  
TTTACTTGTCTGCACTCTCTTTTCAAGTTGAGGAGGATGTTCTTTTGTGCAATTTTTTACCTGCTGCACTCTCT  
TTTAGTTGAGGGGGGTTTCTTTGTTCAATTTCTTACCCATAGTACTCTCTTTTCAAGTTGAAGGGGTGTTCCC  
TTTGTTCATTTCTTATCCGCAGTACTCTCTTTTCAAGTTGAGGAGGAGGATGTTCCCTTTTGTGCAATTTCT  
TACCCGTAGTACTCTCTTTTCAAGTTGAGGGGACGTTCTCTTTTGTGCAATTTCTTATCTGCTGCACTCTCTTC  
AGTAGAGGAGTATTCACTTTGTGTATTACTTTCTCGTAGTACTCCCTTTTCAAGTTGAGTGGTGTCAATTT  
GTGCACTTCTTGTCCCATGGAAGGTATATGTTATCGTAACATTTCTTTTAGTACCAGAAATATCCTTCAAG  
TAATACTTTTAAACGACCGAGAAGGCTGGTTAATATGATGATCTAACACTTGTACAAGTTTGTCTCGGGTA  
AGGAGTTTTTCAAGTAAGTAACTTAAGCATGTTTTATTCTAATTACTTGACATCAGCAAGATGACAATC  
ATTTTCTGAGTCTACGACCTTAGTATAGTTTAAATGACTACAGAAGATACCTACCTATCTTCTCTCATTGA  
TAGATTTTAAAGTTTAAATGTATATACTTATAATTATTCTTTCACAGGTATATATAGAAAACTAATGTTAA  
TGAAAAATAAGAACTAGCTTAGGCTGACTCCACGGATGCTATCAACTTAATACTAGGTATATTTTTTAATA  
AAAATGATATTGTAGTCTGAAGAAAGATTAAACACCCCGTAATAAAAAAAGTGCCTAGAACACCCAAA  
TATATTCTAAGGCATTTCTAATATCGTTATCAGCACATTCAATTTTAAATCGAAAGAAAACCAAATTA  
AACCCAAATAAAATTAATATTGTAATAACAGCAAAGCACGATTTTCAAGTCTCAACCAAACTAAAGAATA  
GAAAGATTTACAGCCGTCACTTCTGTTGTAGGAATATCGATGTGTTAAATGTGATGCTACATATATGAAC  
ATGATTTTTTCAAGCTTAACTACATTGAAAAAGGAGCATGGATTTGACTAGTCAGAAAAATACAATCCGGT  
TTAAAAAAGAAATGTTTATATATAACTGGATTGGAATCCACATTATCTTTTGTAAACACTCGTTGTACCAA  
CTTTTTTCAATCTTGTAAATTTATCATTTTAAATCGTTTTAAAGTTTTGTATACGAAAACGAGAACTGATTTA  
ATAACTTCAAACCTTCTAAGAGCTAATTAAATTTTACGATTTCACTTGCATTTATGTGGTTCTATAATAG  
CAAGGGAATAAGAAATGATATGCATTTATCATGGTTTAGCAAAGAAAAAAGGTTCCCTTAAAGAGACAA  
AGTGAAAAATGTAATAACAGTGGATATGAAAAATTATGCTGAAAAACATTCCTGAAAAATAATTTATTAT  
TAATTCATTAAAAATTTCTTTTGTCTTTTCAACGGAATTTTGTGTTGTTAGTATAGAGATCTATCAT  
AAAGTTCTTTTATTTCAAGATCAGGTAATTTAAATATGCAAAAAAGTAACGTGATCATGTTCTTTTTT
