# Supplementary material for: Evolutionary Conservation and Diversification of Five Pax6 Homologs in the Horseshoe Crab Species Cluster
Source: MDPI journal article supplement (doi:10.3390/arthropoda2010007), 2024-03-04
Supplement: s1 [file s1]

>CM024339.1:163553915-163577224 Tachypleus gigas isolate IMCB\_SINCHF\_001  
chromosome 2, whole genome shotgun sequence

CTGAGAAAACCTGACCAGCGGCTACTAACAGATTTTACAAGTTTATGATAACAGCAGAGTGTTTCGATGAAG  
**ATGCCCCATAAAG**GTTAGAACTATAAAATTTTGTGTTCTTTGTCCAAAAAAGAAATAATCTGAACATGT  
AAGATGTTTTCAATATTTTGTGATGACGAGAAACCCACTTGAAGTAAACTGTATCTCAAGACGACTGGT  
ATGGGTATTAGAACTGTTATTAAATAAAGTAAAGAACAGCGTTTCGACCATCTTAGGTCGTCTTCAGTT  
TAACATCAACAATAATAACAAGAAAAAGTAAACAAAAAAAACACCTGAGGATGATCTAAGAAGGTCGAA  
ACGTTATTATGTTGTTTATTATTATTAAAGCTTTAATACCCATACCATCCGTCTTGAGAAATGCATGATTT  
CAAGAGTGTTTACATTTAGCGTGTAAGCCACCTAGTGGTATAGCGTTAAGATTAAAGGCTTATAAAAC  
AAAACAAAAACAAGTAAACAGAAAAACAGGTTCCCTGAATCGTGGTGGATACAGCACAGATAGTCTGTTGTG  
TACCTTTGTGTTCAACACCAAAACAAACAAAATGTAGTGAACAAAACGAACATTTTTTCTTCTTTATCTAT  
ATCGACTTTTTGTTTTAGAGCAAAGCTACATTGGACTATCTTCTGTGTACACCGCGATCAATCGAACCCAA  
ATTTTTTGTGTTTTAAATCCATAAACTTACCGCTGTCCCACCGGAGGACTTATATACACCGAATTACTCA  
TCGGCGGTTTTGTCCACCGTGAGGAATCGAACCTGGATTTTTTGC GTTATAACTGCAAACTCACCTCCAG  
CTTTGGGGGGGGACATTAATTTACGAATTCTCAGTTGGTTACAAAGTGAATTTGATATATCTCTGCTCT  
GCATCAAACTCGAATTATATTTGTTGCTGTTGTAAATTTTATCCGGTCCCAATTCCTTTTATAGAAAAGTT  
GAAATATATGATTTTAAATTTACTTCAAAATGCCTTACCAACCTGTGCTTCCGTTTTTCATTTATTATGCT  
CCACACATTTATGTGGTTATATTTCTTGCTCGCTTCATCGCTTTACGATTTAAAAATCTCTATGTGATTT  
CTACAGATGGCTTTTTTTCTATTTGATTTATCTGGAAGTTATAATGTGAACATTGCTTTATTGTATTATA  
ACTGTTCTGCATAACTATCTAAACGGCTTAGTTTGTGATTCAACAGTTATTTATTGCAAAGTTTTTCATA  
TCAAGACGCTAGGTGTAATAATTCGTGTTTTTTTTTTTATTCAACATTTTTTTTCATTTGGGGAAGATTTCT  
CCTCGTTCTCTGTAG**GTACAGTGGGGTCAATCAGCTAGGCGGAATGTACGTGAATGGAAGACCTTACC**  
**AGACTCGACTCGTCAGAAGATCGTGGAGCTAGCTCACAGTGGTGCTAGGCCTTGTGATATCTCCCGTATA**  
**CTTCAGGTATCGAACGGCTGCGTCTCCAAGATACTGGGACGTTATTATGAGACGGGCTCCATCAAGCCTC**  
**GAACTATTGGTGGCAGTAAGCCTCGTGTGGCTACTGCGGCTGTTGTCAATAGAATAGCCGACTACAAAAG**  
**GGAGTGTCTTCCATCTTTGCTTGGGAAATGCGCGACCGACTTTTGGTGGGAAGGAGTATGTAACAGTGAA**  
**AACATTTCCAGT**GTGAGTGACCGATACGTAGAACCCTAAGGAAACATAGAGAAAATCACGAATTGTTTGCA  
CTTGTCATTGTTTTCGAATATTCTTTCTCGTATTGATTTTTGGCTACCCAAATAATTGCTTAATGTGC  
AATTAATAGTAATTATATTTTCATTTATTTTTTAAAGCTAATGTGTTATGATAAAATATGTTTTAAAAGGA  
ATAATAAATTTAAAGAAAACTGTAATAAGTAATAAGTAGATTGATGTTTGGCCCCCAGTGGCTCAGCGG  
TATGTCTGCGGACTTACACGCTAAAATCCGGGTTTCGATACCCGTGGTGGACAGAGCACAGATAGCCCGT  
TGTGTAGCTTTGTGCTTAATTCAAAACAACAAAACAACACAGATTGATGTTTTTCAGCGTTAGAAATGTT  
CTATATATACTACACTCATTCTATATAACGTAGCTTATATCTGACTCTCTTCGATTCAAACTGTATG  
ATTAGTTTTGGAAAAGTTAGCGAACAAATATAAATAATCTAAACAACTAGTATTCATATCCATGACGCGT  
TTATTTATCTCACAAAAGTTTAAAGCACGTATATATATATATATATACCTATTCATTTGTTGTTGTTT  
TGAATTAAGCACAAAAGCTACACAATGGGCTATCTGTGCTCTGCCCACCACGGGTATCGAAACCCGATTT  
TAGCGTGTAAGTCCACAGACATACCGCTGAGCCACTGGGGGGCTATACCTATTCATATACTTCTAATTAA  
CTACGTTTAGAGTTTGAGAAAATTTGCGACTTTCATGTAAATAATAAAACAATATTTTGACATTATTTACA  
CGAACGTGGGTTACATGCTTTAAATTTATACTCTGCTCTAAACAGGCCTGGACTTGTTACGGTGACAACA  
CCTTTCAAGGACATATCGTCAGACGGATATGTCTTTCTATTTGGATGAAATGTTTTATAGCCCTTTACTG  
ATTAATTGCTCCCAGCCCTTAGTGGCACAGCGGTATGACTTTGTATATATAACTCTTTAAACCCGGGGT  
TCGATGCCCGTGTGGGCAGAGCACCCATAGATCACTGTATAGCTTTGTGCTTAAACGACAAAACGAATAT  
AATTGTTAATCCTCAAAGAGTAGTTTCGGTTAACTGGACTTGAGTTACTCTCTGTTTTTATATTTGTTTC  
GATTTCTTTTCTTTTCAAATTTAAGTTTAATATGTGAATATACACATTGTATTTTCGTGTATAGCATCG  
AGACAGGTTTTTAAAAACGAATTTTATATTCCAACATAGATATTATTACAATAAATAAATGCTGCTGTGTT  
ATCTCTCGGTGCAATTAATTTATACAATAAATATATTGTTGAGATACCTTTCTTTTAGTAGAATTACTTT  
TTACAATAAATACATTGTTGAGGTACCTTTCTTTTAGTTGTTGTTGTTTGGAAATTCGCATAAAG  
CTACTCGAAGGCTATATGTGCTAGTCGTCCCTAATTTAGCAGTGTAAGACTAGAGGGAAGGCAGCTAGTC  
ATCACCAACCACCGCCAACTCTTGGGCTACTCTTTTACCAACGAATAGTAGGATTGACCGTAACATTATA

ACGCCCCCACGGCTGGGAGGGCGAGCATGTTTGGCGCGACTCGGGCGCGAACCCGCGACCCTCAGATTAC  
GAGTCGCACGCCTTAACCGCTAGGCCATGCCGGGCCACCATTCTTTTCAGTATAATTACGTTTTACAATG  
TTAAAGATGTTACTTGTATAGATTACTCGAAGGTATTTATATAAACATCTTGAGTGTCTAATTATTTTTT  
TACCCCTCGCGAGGATATAATTGTTATAAGTTTAAATTTGTGTGTTTTCTTATAGCAAAGCCACATTGGGC  
TATCTGTTAAGTCAACCGAGGGGAATCGAACCGCTGATTTTAGTGTTGTAAAACCGTAGACTTACCGCTG  
TACTAGAGGGGGGTGTAAGTTTAAATAAGTGATAAGTTGTTGTTTTTAACTTCGTGGGTAAATGTTAAAT  
TAATGAGCACTTTTGGTTAAATTACCTAACTAGCAAATAGCCCCCCCCAGTGGCTCAGCGGTATGTCTGC  
GGACCTACACGCTAAAAATTCGGGTTTCGATACCCGTGGTGGGCAGAGCACAGATAGCCCATTTGTGTAGCT  
TTGTGCTTAATTCAAAAACAACAACAACACTAGCAAATAATTCATATTAACATGATGATTGTGTATAT  
GGATACAATTATTATTTGTTGTATATACGTTTATGAGATAGTTAAAAAAATTGAAAGACAAAATATTGGC  
GAATCGGACTACGAAAAGAAGAAAACACGCGCAACTGTTTGTGTTTATTAAACATGAATGTACATGATA  
AATTATCTGTCCTGTGTGCGACCAGGGATATCGAAACCCGATTCTAGCGTTATAATCCCTTAGACTTACC  
GTTGTGCCACTGGAGGGCATTCAAAGTGAGGAAAACCTGAAAACAAACCTACTAAACATTAAGTAAAGA  
CAAGAGGCTATCCGCTGTGTCCACCACTGGGTATCAAAACCCGTGACAACTGAAAAAAAATTTCTGAAACA  
TAAAAAATACATATTCAAATTTGAGCTTAAATGAAAACCTGTGACTTATTTCCTTTAAAGAACTTACAAT  
GTCTCATGTCTGAAATTTTAAATTTAAATTTAAATAATTTTTAGTTAAATGTTTCGTTTGTGGCTGA  
TCTTGCTTGGACTGTTTTCTTAATTAACAAGTCTGTACGCCCTCTATGTCTCCCGGTGGATCAGCGGTAA  
GTCTTCGGATTTAAAGCGCTAAAAATCGGGTGACGATTTCTCTCGGTTGATGCAGTAGATAGCCTCATGT  
GGTTTCACTATAACAAACACACAGACACGTCCTACATAGTTGTATGTGGAAGAATTAATACGGACTTT  
ATCTTCAGTGGATATACCTTGTAACTTAACATGGATATGGTTTCCATTTTAGTCTAACGTGGATATAAT  
TCCTAATTTAATTTACAGCAAAAAACATTTCTGATTTTGTGTTAATATAGATTTACTTCGTGATTTAATT  
TAACGTAGTTATACGTCATAACTTAGTTTTAAAGTGGATTTACTTCGTAACCTATCTAAAAGAGTATATAT  
TTTATAACCCAGTTCAATGTGGACGTACTTCATAACTTAGTTTTAAAGTGGATTTACTTCGTAACCTATCT  
AAAAGAGTATATATTTTATAACTCAGTTCAATGTGGACGTACTTTATAACTTAGTTTTAAAGTGGATTTAC  
TTCGTAACCTTATCTAAAAGAGTATATATTTTATAACCCAGTTCAATGTGGACGTACTTCATAACTTAGTT  
TAAAGTGGATTTACTTCGTAACCTTATCTAAAAGAGTATATATTTTATAACTCAGTTCAATGTGGACGTAC  
TTTATAACTTAGTTTAAAGTGGATTTACTTCGTAACCTTATCTAAAAGTGTATATATTTTATAACCCAGTT  
CAATGTGGACGTACTTCATAACTTAGTTTTAAAGTGGATTTACTTCGTAACCTTATCTAAAAGAGTATATAT  
TTTATAACTCAGTTCAATGTGGACGTACTTCATAACTTAGTTTTAAAGTGGATTTACTTCGTAACCTTATCT  
AAAAAGTATATACTTTTATAACTCAGTTCAATGTGGACGTACTTTATAACTTAGTTTTAAAGTGGATTTAC  
TTCGTAACCTTATCTAAAAGAGTATATATTTTATAACCCAGTTCAATGTGGACGTACTTCATAACTTAGTT  
TAAAGTGGATTTACTTCGTAACCTTATCTAAAAGAGTATATATTTTATAACCCAGTTCAATGTGGACGTAC  
TTCATAACTTAGTTTAAAGTGGATTTACTTCGTAACCTTATCTAAAAGAGTATATACTTTTATAACTCAGTT  
CAATGTGGACGTACTTCATGACTTGGTTTTAAAGTGGATTTACTTCGTAACCTTATCTAAAAGAGTATATAC  
TTTATAACCCAGTTCAATGTGGACGTACTTCATAACTTAGTTTTAAAGTGGATTTACTTCGTAACCTTATCT  
AAAAGAGTATATATTTTATAACTCAGTTCAATGTGGACGTACTTCATAACTTAGTTTAAAGTGGATTTAC  
TTCGTAACCTTATCTAAAAAGTATATACTTTTATAACTCAGTTCAATGTGGACGTACTTTTATAACTTAGTT  
TAAAGAGATATTCTTTCTATTACTGTACTAAACCCTAAGAGCTATTACGTTTCGTTTATTAGTACAACTC  
CACAGTAACGTAAAAATATTACATTAATCCATATAAAAAGGGGAACATGTATTTTAGTTTGTGTTGTT  
TGTTAGTTAAGCACAAAGTTGTAAAATGAGGTATCTGTGTTCTGTCCACCACGGGTATCAAACCCAGTTT  
CTAGCGTTGTAAATCTACAGACATACTGCCCTGTCACTAGGGGGCGTGTATTTGAACAATGCGGACTCTA  
AATATAATGGGTAAATTAGACTCTAAATATAATGAGTTAAATTAGACTAAATATAATGAGTTAGGTTGG  
CCTCTCTTATTGCGTTTCACTTACGTGTTTATTTTAAATTTTGTGTTAGGAATTCAAATTGCATTTT  
CGGTAACGACCGGAATTTTCTAATAGCCTTTAGATTGTTTATTGTACACGTAATCAACAGTTTGACTGTG  
ATGTAAAGTGGTGAGATTTATTCAAACCAATCTCGGATCAAATGGTTACCAACACGTAATTTATTCTAC  
GTAAATGGTTCTGTATAAAGTAACCTGGTCTAATTAAGTGCACAAATTTATGAATTAAATGTTAATTGTA  
TGAGCTTTTCTTTATTAATCAAAAATAACGAATTGCTGTGTCTGTTCTGTTCTTTAGTGGCATCATAAAGC  
ATTATGTTTTCACAATAATTTCTATGATTTTATAACATTTAAAAAAGGGTTAACACATAAATCAATGAA  
TAACACGCTTTGGTGTTTAAAGCCTTTTTTTTTCTATTTAGCAGCATAATAATAATGTACTTTCACTATT

ATTGTACGAGGTCACCTTAGCAGCATAATAATAATGTACTTTCAACTATTATTGTACGAGGTCACCTTAGCA  
GCATAAAAAAAAAACATGCTAACATGGTTTTCTAGCAGGCCCGGCATAGTTAGGTGGTTAAGGCAAGGATTGC  
GGGTTTCGATCCTCGTCACAACAAACATGCTCGCCCTTTCAATCGTGGAAGCGTTATAATGTTACGGTCAA  
TCCCCTATTTCGTTGATAAAAGAGTAGCCCAAGAGTTGGCGGTGGGTGGTGATGACTAGCTGTTTTCTT  
CTAGCCTTACACTGCTAAATTAGGGACGGCTAGCACAGATAGATCGCGAGTAGCTTTGCGCAAAATCCA  
GAAACAAACAAGCCACCTAGCATGCTCTAATGATACACTTAGCAACATAACAATCATATATGCTTTCAAA  
CATGGTTTATGTGAAACATTTAGCAACATAACCATCTATTTTGAAACATTTTTTTTTAAATCTGTATCAACA  
TGTGTTTTTATGATATATAACAACGCAAATCACCTATTTGGACTAATGGTACTGTAATATACTGTTTTTT  
TTAAAAATAAAATTCGTGTGTCTATGAGCTATGTTATGCTGTTTTTATCAGTAGCTAACACTAATATTGC  
CCATCTACTTATATGAGATGCACCCTTAGATGAGTTGTTTCAGTGTTATGGCCAGTTCCTTAGATACACAC  
TATTAATCGCTTGTACCAAAGGTGGTTCGTGTATCCGATTAGTCCAATAGGGAGCGTCTCCAGTCGATGTT  
CGATGTTTTGGAATAATTCAAGGGTAGTTGAAAAAGAAATATGTACAGAGCATTGACAGGCGAATCCAA  
CATGGTTTTAGAAAGCTTTGACAAGCGAAACAGCAGGCCTTTCAACCGTATTAGTGACATCTTTTTAAAA  
GAATAAATATATATTTTTGTTTGGGTTTTGACGAGGTTTTTATATGCTTAAGGTGCAAGAGTGTCATTCA  
GGTCTGCCCTGTATGGCCAGGTGGTTAGGGTGCTCTTCGCGTAATCCGAGGGTCGCGAGTTTGAATCTCC  
GTCACATCAAACATGCTCGCCCTTTAGCCGTTGGGGGGAGTTCTAACGTGACGGTCAATCCCACTATTC  
GTTGGTAAAGTGTAGCTTAAGAGTTGGCAGTTCTCCGCTGGTATAGCGCTAAGTCTATGGATTACAAAC  
GCTAAATCAGGGGTTTCGATTCCCTCGGTGGACTCAGCGGTGGCCTGATGTGACTTCGCTTATTTATCA  
CAAATCAAGCCAAAGTTAAGAGTTGGTAGTGGGTGGTGATAACTAGGTGTCTTTCCTCTAGTCTTATACTG  
CTAAATTAGGAAAGGCTGGCACAGATAGCCGTGCTGTTACTTGAAGCTAAATTCAAAAACAAACAAACAA  
ACAAACATTCAAGTCTAGTGAATGATTTGTTTGTCTGAAGTTAAGCACAAAGCTGCACAATGGGCTATCT  
CTACACTGCTGAACACTGGTATCGAAACCCGAATTCTAGCTACGGGGAGGGGCAAAATAATCTTATCAGA  
AAATGAGGGGGCATCTTTTGTATAAAATAAACAATTCTAAACATGTATTTGGGTTTGTTCGGTTTTTGTG  
TTTCAAGGTGTTTTTGAAGTTTATGATCAAATATTTAACCTTTAAGTTATTTAAAAGCGTATATAAAAC  
GCATATAAGCTATGCTAAATTAACAAACAGCAACGTAAACATGATTATACTAGTCATAAGACATTACTAT  
TAAGCCTATTTTCGATTTAAACGCCATTTTCTTAATCTATTTTATTTGGGATTTTCAATAATTATACTAA  
TAATGTTTCTATCACGTTATATTTGCCATTTTCAATACCCACAACACGTTTCTCTCGATCTAGTGTTCTT  
CAGGCTGGCTCAGATACATTCTTTTAAATCTTGAAAACCTCAAGGAACCTAGGTTAATGACATGTTGTTTA  
GAATTGAAATAGGCCCTAGTATTGTTTGTGTTTTGAATTTTCGCGCAAAGATACACGAGGGCTATCTGCACGGC  
TTAGTCTTATAACAAGTAACACTGAATAATTCTTCATTAGCTTGTAGAGAGCGTACGTACGATATTTGAT  
GTGTGAACATAATCATATGTATATTACAAACAATTACACATTTTTTACCGTATTTTGATACGTATTATT  
CACGTACTATTGAAACATGTAGTACGTTTTGATTACGTTGTTCTGTTTGTCCGTCGTCGTTTGTTCATT  
TTCTAACTATTAGCATAATACGGTTTTCTGCTAAACAAGAAAGAAAGTACACGAAAAGAACTAGTTTC  
ATAAAGTTTACTAACTAATATTTAATAAAGAGTGTTAATGTATCTTTATGGTCTAGTTTTGGGGAAGTT  
TTGTATTACAGTTAAGTGTATCGACCACTTAATAAATGTATATAAGACTAAGTGCATTAAAGTAGTAATA  
TTATACAACAACCTCACGCCCCAAATAAAACCAGTACAGAGGAACACCTTTATAACTATATTAATAAATGT  
AATCTAACATCTAAGCACGCCCTCTACATTACATCACTCAATTACACAACGTGATATATATATATGATTT  
GTGAACGAAATGCGCGTGCGTATTTTTGACCTAAATAAGCTGAGAAAGTCCACAAAATTTTTATTAAGCG  
TAATGTTAATTTTAAGAAGTTACACGCGGGTTAAGGATTATTTGTGTGAAATACCCCTGCAAAATAAAAAA  
TTAAAACCTGAAACTCAAGCCAGTCGTACAGTGATTATAACGACATTGCGTTTTTCAAACAACAGGTAAGGT  
TGTTGTTGTTTTGAATTAAGCACAAAGCTACACAACGGGCTATCTGTGCTCTGCCACCACGGGTATCGA  
AACCCGATTTTAGCGTGTAAGCCCGCAGACACACCGCTGAGCCACTGGGGGGGCTACAGGTAAGGTGAG  
TCTGAATTTCTAATGCTGTAAATGTGTGGTATATAATCGACATATTTGTGACGAAAGTTGCGAAGCGTATT  
ATTTATATCGATAGGTATAAGACCTGCTTTGAGCTACTCTTAAAGGTGCGTGTTAATTTGTGTGTGTGTG  
TGTGTACGTGTATGAGTTGTTAAATTTAACAATTCGCTTTTATACTGTAAAATTTTAAAATTTACTCTA  
AAGTACTGCTTATGTTGTTTTATGTTAATAAAAAAATCAGCATTTTTATATTTTAAATAAAAGACCGTGA  
AATAAACATATTTGAACGTTTCGTTATTTTTTGAGTTCCGAATCTGTTTTCTGCGTGTTTCAATGTTTT  
GTTAAATTTCTGAAATTTTGTTAACGAGTGTAAGAACACAGACGATTAATTTAAAGTTTAAATTTTAAAAA  
AACCTTTATTAACAGCGTTTCCTATTGGCGAAATTTTGCGTTGTTAGACAGGAATGCAAATTGAGTGAAA

TACTAGTATGTATATTGATATAAAATGTATTGAAATGTCAATTACATGCTTTTATATACCAGCATATTTGA  
CAAAATCTAAGGCATTTTAATAATTCCATTTAGGTTTCTTCAATCAATAGAGTTTTAAGGAACCTCTCGT  
CTCAAAAGGATCCTCACCGGACCTCTCCTCAAGTTTCCGTGGGTGGGCCAGAGTCGGTTTACGACAACT  
GAGGATGTTAAACGGTGCCAGCCGTGGCCGTGGTACCCGACGGGCACTTCTCATCATTTTCACGGCGTA  
CCTCCGCCCTCATCACCGGTTACGTTGGGTCCCAATACCGGACTTGGGGGATCTGTTCCAATCGGAAACG  
GCCACTCAAGTCTAGGCGTGTGTGAAAGTAATCGCCACGACCACATGAATGTCACAAAGAAAGGTGAGTC  
TAGGTATGGAAAGTTGTTATTAAGTCCTATGTATATTGTATGCACGGGTTTGAATGACACTCTAATATTT  
TGCCAATCTCGAGATCGAATCCGGTACCTCCCTTATCATTTAAGCTAAAGGGATGAACCCATATGTGCTA  
TTAACAATGCAGTTTTAAAAACAATTCAAGTTATCTAGGTATCGAACCTGCAAGTTCGTAGTGCTCTAATA  
ACATCTTGCTAGTAGTACTTGGATTCAAATATCTATCTATCTAATATCTGTACTAAGGGATTAACCCCTAG  
TATCTGCTATCAATAAATCACTTTATGTATAATTCAATATTACCTCGTTATTGAATCGACAAGTATTTATC  
CTTGGCATAAACGGTAAAAATATAACTTTAAGTTATTTTAGACATATTTCCAATTAGGGACATAAAATTAGG  
TGAAGATGTAAAGCGATCAGTAAAAAAACAAAAACCCCTTTAGTAAGCCAGGAAACCAGTTGCTAACTAAT  
TTGCTACAGTCGTATCTACCTTCGAACATGTTTAAATACGTAAACTGTATGGTAAACGTAATTTATGCGT  
GATAAATAAAGTTAAACAGACTGCAGTTCGTATAAAAGCAATTGTACAAGGTGTTAATAGTCTATGTTTG  
TTACTAGGTGTTAATAGTCTATGTCTGGTACAAGGTGTTAATAGTCTATGTTTGTTACTAGGTGTTAATA  
GTCTATGTCTGGTACAAGGTGTTAATAGTCTATGTTTGATACTAGGTGTTAATAGTCTATGTTTGTTACT  
AGGTGTTAATAGTCTATGTCTGGTACAAGGTGTTAATAGTCTATGTTTGTTACTAGGTGTTAATAGTCTA  
TGTCTGGTACAAGGTGTTAATAGTCTATATTTGTTACTAGGTGTTAATAGTCTATGTCTGGTACAAGGTG  
TTAATAGTCTATGTCTGGTACAAGGTGTTAATAGTCTATGTTTGTTACTAGGTGTTAATAGTCTATGTCT  
GGTACAAGGTGTTAATAGTCTATGTCTGGTACAAGGTGTTAATAGTCTATGTCTGGTACAAGGTGTTAAT  
AGTCTATGTTTGTTACTAGGTGTTAATAGTCTATGTCTGGTACAAGGTGTTAATAGTCTATGTCTGTTAC  
AAGGTGTTAATAGTCTATGTCTGGTACAAGGTGTTAATAGTCTGTATCTGATACAAGGTGTTAATAGTTT  
GTGTCTGGTACAAGGTGTTAATAGTCTATGTCTGGTACAAGGTGTTAATAGTCTATGTTTGTTACTAGGT  
GTTAGTAGCACTGCGTTAGGTGGGCCACCTTCTATTTTTTTATTTGAATTATTGAGAACCATATTATATT  
GATGAAAACCTCAATTACAAGTAATGGTAATAAACATACATTGATGAAGACACCAGCGTACATCAGAAATT  
TATAAAATACGAACCTTTATACATCCATTTTTATCAGCACGCGATACTATCTCCTAAAACGACAAATTCGG  
CCGTAATCCTGACAATATCTAAAAAAGTTGACGATTAAGGAGTTTTAATTTACTTCTGGTTCCACACGT  
TAACCACAAAAATGCTAAATAACATTCATAAGTGTAACCATAATTGAAAATGCTTTCACACACACGATAAT  
TAACATTTTTTTAATGATTGGATGGTTATTTTGAATTAAGCACAAAGCTACACAATGGGCTGAGTGTGCTC  
TGCCCACTGTTTATTTCTTCTTCGCCATGTGGCCAAACGTAGTGGAATGGCTGAGGCCCTAGACTC  
GCATTCTAAAGGCCCAATCTTTTTACCAAACACGCTCACACTTTCAGCCCTTAGAAGTGTTATAATGTG  
ACAGTAAATCCCATATTTCTGTTGGTAAAGAGCAACCGAAGTGTTGACGATAAGCGATGTCGACTGGCTAC  
CTTCTTATATATTCTATCACTTCTATCATAATTAAGGATAACTCTCGAGTGGTTCTGCACGAAATTCAAA  
ACCAAAACCAAACAACCTTTAACATGTAGATGGTTTTATACACGAATTTGTTGCAACTCATTATAATAAA  
GAACATAATTATAATAAATGTTATGTAATGTTTTTCAGCCTAGATTTTAAATCAACCTATTACAGTTTTAA  
ACAAGTTATTTTAAACGATTCTTAATATTTTATTGTTGAATTTGAAATAAAATGATAAACTTGTGGCTCC  
GGTGTACAAAACCTTAAATATATAGACTAAAATCCGGGTTTTGATCCATCGCGGTGGACACAGCAGATATC  
TTAGTGTGTCTTTGTTCTAAAAACAAACAAATCTTGTTAACTATGAATGTTGTTGTTGTTGTTTGAATTA  
AGCACAAAGCTACACAACGGGCTATCTGTGCTCTGCCACCACGGGTATCGAAACCCGGATTTTAGCGTG  
TAAGTCCGCAGACATACCGCTGAGCCACTGGGGGGCAACTATGAATGTTTCTTGTTTGTGTTTTTGTAA  
GCACAAACGTACAGATTGGTCTATTTGTGCTGTGCCTACTACGGGTATCGAAATCCGGTTATTAGCGTTA  
TAAACCTTCAGGTTTACTGGTGAGCCATTAGAGAAGGAGGGTCAACCATGAAAATAAACGTTTGAATA  
GACTAGAGAAAAAGAAAAAAAATGTCTAGTAAAAGAAGAAAAAAGAGAGAGACTTATCATGGTCTCTTT  
TCAAAATCCCACCTTCTATTGAACGTTTTTACCCAGTAATTCTCCGAACCGAATGCATCGTCCGTTTTT  
TGTGACGCCTTCCAAATCTGCCAAACAAGAAAGTAGATCTAATGAGCCGAAGCGTGCTACGAACCGGGG  
AGTTCAAAGCAAACGATTACACCTTCTGGTCTTCATTGTCTCGCCTCTAGCGTCTACTGGTTGTTACAG  
AGAGAAATACGAGCTGGCTTGACATTCTACTCTTCGACATCCTGCGTTGTCTAAAAGTCATTAGGAAAA  
CTTTCACCTTCTAAAGTCTTAGGTTGATAGTGCTTCGTCTTTAACTTGGGAACAATCAGAGGGAGTTG

TTCCCTAGACGCCGATTTCTCCGACCCGGTAAAGTTTGGGATAAAAAGAATGGTTCACCTAAGTTTCTTTT  
TTTTTAAAGCCTTACTGATGGTAGAGGAGTGAGAGGAGATGGTGTACCGTGCGAATTTGAGATAACTGTG  
ATTTTGTGAATAGATGTTTCGTTGGTGTGTTGTGAAGAGCTTACACCACTCGGTCTTTGATTTAGTTGTGGC  
CAACAACATTCAAATGAACTCCTCTGTGAAGGGAACTTTTCCGCTCCCTAATCTCAAATGTATCGTAAGT  
GGAATCAAAACAGAAATAAAGGTCACCGTTCCCTCTACTGGGTTTTCTTGACCTGGAATATGGATCCACGT  
CATTTTCTGGATCAGTACCTTTCCCTAAATCAGTCTTTCTATTCTAAGCTTTGTTTCGTACATTGTGTGAG  
GTTTGTATGGGGGGGGGAGGGTAGGTGGTGTGCTGAATATTTGAGGCAAGGGAGGCGTTAGCACTGGC  
GTCATCCATCTATAACGTGACTTTATTTATTATTCTGCTGGTAATAGTACTGTAAGTGAACATCGTAATTC  
ACTATGGTAAATAGAATGATATTTTAAAGAAACACTCGCATAAACACTCAGTCTTTGTCAATTAAGCCAC  
CCGAAGATTAGTTATAATCTCTTACTTCTATGGAAACATATTGCCTAAAAGTGACCCGATATTAGTTTC  
CCAGGTTTTGTGTTACTCTTATAGAGTAAACACGAGGATTGGCCACTTTTATCTCTTGTGTTAGAAGTT  
TACTCACAATGGCTCATTTTTGTCTATTCAACTAGTCATGCTTTTCAAGTCCAGGGAAGACTATAGATAT  
TTGTAAATAACGTACACAAGACATGTACAGAGTAACATAAGGAACAACCTGGTAAACACGATCCGGAAAA  
GGACTTAGTGCTTAAGTCTCTATAGTACGTTTTCCATTAAACCTATTTGTGAACAATCTCTTTTATAAGC  
TATTTGTGTGGATGTGAAAAACGGCCCGCATTGCCAAGCGTGTTAAGGCGTGCAGCTCGTATTCTGAGGG  
TTGCGGGTTTGAATCCCCGCCGTCCCAAACATGATCACCTTTTCAAGCATTTGGGCGCTATAATGTGACGG  
TCAATCCCCTATTCGTTGGTAAATAGTAGCCTAAGAGTTGGCAGTCGCTAGTGATGACTAGCTGCCTT  
ACCTCTAGTCTTACACTGTTAAGTTAGGTACGGCTAGCGCAGATAGCCCTCGTGTAGCTTTGCACGAAAT  
TAAAAAAACAAACAAAGCACCTGTCTTTACAATAGACCCCTCTTAACGTTAACATGCGTTGTATGCTGAT  
TGTCTTTTCGCGCAATATGCTTTGTCTTATGATCTAACAATGAGAACCCTTCTTTAAACATTCTACTTAC  
GGACGTGATTTGTGGAACCTTTTAAGGTTATGTTTGGAGAGGTTTGGTTTTGTTTGTATTTAGCTTCGCGC  
AAAACCTATATCAGGAAAATCTGCGCTACTTAGCCTTAATTTAGCAGTGTAAGTCTAGAAGGAAGCAGCT  
AGTCATCATCACCCACCGCAACTCGTGGGCTACTCTTTTACCAACAATTAGTGGAATTTACCGTCACAT  
TATAACGCCCTCACGCCGTGAAAGGTCGAGCATGTTTGATGTGCCGGGAGATCGAACCACGATCTTCGGA  
TAACGAGTGAAGTGCTTTAAGCCCTGACTATGCCGGGCCGTTTGAAGAGGTACGAAAATAAAGTTTCAT  
TACAGTGCTTAAATAGGTAAACAAACAGAAGAGAAGTTTATAATTTGATAAAATAGCCGTGAGCTCCTGAA  
GTTATAAAGCGAATTTACCCGGTCGTCTGTAGTCTACGAGCTGTGAGATTAAGGCTAGAGAGTGAAAAA  
AATGTTAGTGAAGGATCTTCAGAAAAGTCTTGAAAAGATATTCTAGTTATGTTATCCATTAAAAGCAACAT  
AACATTGCTTCAAACGTTCGCCAGCTGTGAGAGGATTATGAGATTTGTGTTGAACGAGTTTATTATCAG  
TAGGCCATCCCGACCTAATTCCTCAGGACAACGAGGGATTAAAAGGAATCCTGGCGCCACTGTCTTATT  
GGAAAATCGCTTTTGTAAAGAAGAACTACATTCTAAATAAAGCTATGCCCTTGATGGAACTTGAAAAATTT  
GCTGAGTGTTTCAAAGTCGTTAGCGTAATCGTAGTAAAAATCGTGTTAATTTATTTTCGCTTACATAAAC  
ATTTGAACCATTTGATAGCTGTATTTATGACGTTTTATAAGCCCTGGATAAAATATACAAGTCGTTTTAGT  
AACTTTATAATGGAGTGAATGTTACTAGCAGAAGCAATACATTATGTAAAATTAATTAATTAGTTAGTTA  
TTTTAAAAATCTAAACTTGTTAAAAAAACAGCTACTGTCTTGATGAAGGAACATCAAATCCACATCTTCC  
CGATAAATGGGTCTTAAACGATTGTTTCTGGTATAAAAGTATCTAAAGACAAACGGAACCATCGTTGGTT  
AAGTCTTCGGATTTACAGTATCAAAATTGGAGTCCAATTCCTCGTGGTGGACATAGTAGATAGCCTGACG  
TGGCTTAGCACGAAATCTGACAGACAGACAAAGATACAATGTATGATGGCTGATGACAAATAAGAACTA  
ACTCTGATTCTGAAGAAGATGTAATTCATAAATCAAATAAATTTGATTATTATGAAGTAGATGTATTTT  
ATAAATCGAATAAATCTGATTCATGAAGTGGGTGTAATTTATAAATCAAATATAATACTATAGAAAACT  
TTATTCTAAAGAAAGTGTTAAATATATCCTGCTGAGGCTATTATCTACGGAGTTTTCCATAATCCACTTC  
TCTACACGAACAGTAACGCGTGTTATTGTGTACACGAGGACCTTCTACGGTATTCTATTAGTGTGATAAC  
CTCTAGGCTCTTACTACTCAGGAGGGCCTTCGTGGGCTCTTTAGGAGGAAGGGGGCTGAAATCTCGTG  
CAATGTTTTAAAGCTAAGCAACCAGATCTATACGCTCTTTATAGAATAAATGCTACGTGTTATTAGAGCCA  
TTACCAGAGCTCTATGTGCCAGGTAGGCCTAACTGACTGACAGATTGCAGTGTGATTTATTGAAGAGCCA  
CTCAAAATCGTCGGACACATCACACGTATAAATGTACGAGCGTTATTTTTTGGTTAGAATTAAGAAAA  
TTTGTCTGTCTTTGTAACTTAAGGCTACAATTTTTGTGAGCCAGAGTCAGAGATTTCTTCGAGATTTC  
TTTAACTGAAAGGCACATCAGTGTTATCTGTAGAAGTGGCATTTGGTGTTTGTGTTTTGTACGCTTGCC  
CTCCCTTCTCGGAAGAGGCAACGTGGGTTTTCAAGTGCCAAAACCAATCACTAATTTCTGTTTGCAAC

CACGTTCCATAGCTTCCAGACTTGCTTCAACACTACTGGATTTTTCTAATACAGCACGACTACTGCCATT  
CATCCGGTGGGTCCCTGTTCCACTATAAAAAATCAGTTGGGGGGGGGCTTATTAAATAAAAAGTTGTTTTTAA  
AACCATTAAAGGAATTTAAGTTAGTGAAGTATTTTTTCGTGAGATTTCGTTCGTAAACGAGTTCTATGTGTTA  
GTTTTATAAGCCAACAGCTGTTGTTTTACGTGGCGTTGAGTGTAGCAGTTTATTATATTCACGTGTCCA  
AAAGTTATATGTTACGAAGCTTACCATTGGTCTCTGTAAATTTTCGTGCCTTATTCATATAACAAGAAATGT  
TATACTAATACAGATTACTTTTTCTTTTTTATTACAAATTTTCGTTTCATCTGTTGTTGTTTTTGGTTG  
TAGGAACTATATTTTCTTCGCATAAAATATGAAGAAACCTCTGTGTTTCTTAGTTGTTGTTTTTTTTTCAG  
TTTGTTAAGCGGACATGACATCAATACATCACAAAAGCTTTAGAATACAAGGTTCAATTATTTAACCAT  
TGGGGTTTTATTAATACAACATTACATTATATCAAGTTTTATAATGCATCCATCAAGTGTCTTCCTCTTG  
ATACAACAAAACTGTATAACTTATATATAATATATATATATGCATATATACACTTGTTTTTAAATTTTTT  
GTATTTTCAGGCTAATTTTTAAATACATTGAATTATAGTTAAATATAGTTTCAGATTACATAATTATTTTT  
TATTTAATTCCTCTAATAGTAATTTTATTTATTTTACTTTAAATAGGTTTCGATAGACGCGACATCTGATG  
GAAATTCGAAAACAATTCCTCTGCAGATGAGGATTCACAGTTGCGCATGCGCTTGAAACGAAAACCTCCA  
AAGAAATCGGACATCTTTCACAAACGAACAAATCGAAGCTTTAGAAAAGGTAAAGTCTACGATTCACAA  
TTTTATTTTGAAATCTTTACATTTAAGGTGTGAGATAAAATAACTTCTCGTCATTTTAATGGAAAAATATCG  
TTTTTAGTGATAAAATACAGAACTTCTTTCCTGTCTTTTGACAGTTTATGTAAGTGGAGTCATGTAACCTA  
ACATTAATCATACAACTGATTTTCAGAAATTTGAAAGAACACACTATCCAGATGTTTTTTCGAGAGAAAAGAC  
TGGCTGAAAAGATATCTCTTCCTGAAGCCCGTATTTCAGGTAAGTGTGCTATAAAAGGCATGGCTGATCAT  
TGAATACTCTAATGTGCTGAGACATACACGCATTAAAAATGAAGGTTTCAATATAATGCAGAGCACAATG  
GTGACCAAAATATTCGCTGTATTTGTTTGTGTTTTGTAATTTTCGCGCAAAGCTACTCGAGGGCTATCT  
GTGCTAGCCGTCCCTAATTTAGCAGCCTATGACTAGAGGGAAGGCAGTTAGTCATCACCACCACCGCCA  
ACTCTTGGACTIONCTTTTACCAACGAATAGTGGGATTGACCGTCACATTATAACGCCTCCACGGCTGAA  
AGGGCGATCATGTTTGGTGCAGCGGGGATTGCAATCCACGACCCTCAGATGACGAATCGAACGTCTTATC  
CTACCTGGCCATGCCGTGCCTATATTCTCTGTATATTCACTGCCGACTTTTATCTTAATATTTTAAAGT  
AAATTGAATGTTACTAATGAAAATGTTAAGTACTTGTTACTATTGGCACACATCTTTCTCTAACTACGCT  
CGAATAAAGGACTTGTGTTTTATGCGATTCACTAGCAGTGATGATGTATGGAGCGTTGCGCTCTTACATAG  
TAATAACGTTGTTGTTGCTTGTTCATATGTTTTCTATGAAGACGATTGACCTAAAAACCGAATGAG  
ATGACTCGTTTTATAAGTAGGATATATAGGTAACAAAGAGTAAATTAATGTGTATATCTTTTGTGACT  
CACGGATATATGTAGAGAACTTCGTAACCAACCAAGTCGCAAACCCACACGTATTCTGGTGAATATGCA  
GTTTCTAAAAACGTATCTCAAAAAGCAAATACCTTGTGAACAGTAACATTTCCAGTTGGTAACATAATTAT  
ATCTTGTGTAGGCTATTAAATTAGCCAAGAAAATCTTAGTTCCAGCGTATTTTAAAGTAATTTTACTAAC  
AATTACTTTAAATATATGTGTTTCGAAACTATACTGCGATTAATACAATATTAACATGAATCACGAAGTCG  
AGCAATCGCTGAGTAGAAATAATGTTCCGTACAGTGATGGGACTAGTTGATTTAGTTTACTTATTTTAGG  
AACTCTAATTATGATTTTATACACCCTTGTGCAAAGTAATTGAAAAAAGACCGAAAATTACGAATTTTTT  
CAATTTTTTTTTTGTTTTATTTCTGAGAATCCAAAAATTACTCACAAATTAATACATGATATGACCCGC  
CTTTATTTTGTAATACTGTTCTGTATGCGAAAAGATTAATACCTTGCTCGTCCCTAACTTACCAAAGTC  
TTCTGTTGCAATCTATTTTTGATCTTGGTTTCTTTTAAAGTTTGGAATTAAGCAAGAAGCTCATGATTGGT  
TATATGTGCTCTGCCATACACGGGTATCGAACCCCTGTTTTTATCGATGGGAGTCTGCAGACACACCACT  
GTACCCCTAGGGGACTTTTTATTTGATATCCATATACAACGTATACGTGACTCATCTATTGCCTAACGGT  
GGCTGAGCGGCAAGTATCACAGTTTAATACACTAAAATTCTGATTTTCGATACCCCTTGGTGAGCAGAACAA  
AGGCAATCTATTGTATTTGTTTGTGTTTTAATTTTCGCACAAAGCTACTCGATGGCTATCTGTGCTAGCCGTC  
CCTAATTTAGCAGTGTAAGACTAGAGGGAAGGCAGCTAGTCATCACCATCCACGCCAACTCTTGGGCTA  
CTCTTTTACCAACGAATAGTGGGATTGACCGTTACATTATAACGCCCCTACGGCTGAAAGGGCGAGCATG  
TTTGGCGCGACTCGGGCGGAACCCGCGACCCCTCAGATTATGAGTCGCACCTCCTTAACGCGCTTGCCAT  
GCCGGACCATTATGTAACCTTTGTTCTTGAAATAAACGTCTATCGAATGTAACGTGTTAAAACGTTTAGAAT  
TATCTCATTATATTTGTA AAAACGACATCACTGATTATCCTCATTATACCTAATTTACTTGTTTTTTAA  
CATTCACAGTAACTGGAATGTTTTATATTTGCCAAAGTAATTTCTTACGACATATTTTTTTTTTAGGT  
ATGGTTTTTCGAACCGTCGCGCCAAATGGCGGCGAGAAGAAAAGCTGCGAAACCAGCGACGAGTGATTGAA  
CAACCAACTTGTACGTCTATGCTATCGCCACCTAACGGACGACTACCAATAAATGGATCCTTCTATAATT

CTATGTATCCTGCGTTAGCACAACTATGGGCGGGATGGGAGATTCTATAGGTATGTTGGATCAAACCTA  
CTGTTTTTCACTTTAATCATAATACGTTAATCCGAAAATTAATGTGGATTGTGAGAAAAAATAATTATTT  
TTCTGCATACACAAGAAGTTATACGAGAGCGTTTCTTAACCTACCATGTTTCGTTTGTGTTTGAATTTT  
GCGTAAACTACACGAGGGTCATCTGCGCTAGCTGCCCCCTAATTTAACGGTGTAAGACTAGAGAGAAGGCA  
ACTAGTCTTCATCACCACCGCCAACCTCTTAGGCTACTCATTTACCAACGAATAATGGGATTGACCTTCA  
CGTTATAGCGCCCCCTACTCCTAAAAGAACGAGTATGTTTGGTGCGACCGTGATTGAAACCACAACCCCTC  
AGATTACGAGTCGAACGCCCTAACCCACTAGGTCATGCTGGGCCTCAACTACCATGAATAACGTTGTAA  
ATTTTGTAAAGCTACATTGACGTAAATGAAATCTGGCTTTTATTACATTGTTCTTTATGTAATTTAGCGT  
TTTAATTTATTTGCAATAAGTCAGTCACAAAACATTAAGTTAACTTAGATTTCGTCTGCCAACTAAAG  
TTTGAAGTTATAACGATATAAAAGAAAACCTGTTGTTGGGGACTGTAATTTCTATAAACATGTTTTGATGTAC  
AGTTTCGTTGTAGGAATAGAAATATCACGTGGGGTTTTATTTTGTGCTATTAACAGTTCCTTATGCATTATA  
ATCATATGAATTGTACTGTTGTTTAACCCAGAAAACAATATTGATGTATTAGTAACAATTTATTCATTGT  
AACTCAATGACTTGCTTCTTAGTAGATTTATTAACAACCTGTACTAACAAAACCTAATTTAAAAGTTGTA  
CACTAGAGGGAAGGCAGCTAGCCAATATCACCACAGCCGACTCTTAGGCTACATTTTTTAGCCAACAAA  
TAGTGTGATTAAACCGTCATATTATATCACCCCACTGATGTAAGGGCTAGCATTTTTTGAACTCTCAACC  
TACAGATAACTCAAATAGTGTGATTAACCGTCATATTATATCACCCCACTGATGTAAGGGCTAGCATGT  
TTGGAACCTCTCAACCTACAGATAACTCAAATAGTGTGATTAACCGTCATATTATATCACCCCACTGATG  
TAAGGGCTAGCATGTTTGGAACCTCTCAACCTACAGATAACTAGCGCCGTTATGACCGCGCCAAATTGAGG  
AGTCAAAACCATGACAAGCTTATTGTTTTTTTTTTCATAGTTTCGCTCAACAAAAAACAACAAAAACA  
TAGAGGTAGTTATAAAGTTAGAAAACGATAATTAAAAACAAAGGGATCCGGCAAGGAGCTCGACTCGTAA  
TCCGAGGGTCTCGGGTTTGAATCCCCGTCACACCAACATGCTCGCCCTTTCAGCCGTGTGGGCGTTATA  
ATGTGACGACCAACCACACTATTTCATTGGTAAAAGAGTAGCCCAAGAGTTGGCGGTGGGTAGTGATGACT  
AGTTGCTCTCCCTCTAGTCTTGCACTACTAAATTAGGGCCGGTTAACGCAGATAACATTCGTGTAGCTTT  
GCGCGAAATTGAGAAACAAACAAACATTAGCAAAAAAATAATGTGAGGTTTAATTTTTTAACAGTGTTC  
CTCCAGTATCTAGCATGGCGTCGAACCATTGTCTACAGCAACGCGATCCTTCGTCTTACACTTACATGTT  
CCACGATCCGCTCACTCTAGGATCGTACTCTCGACCTTCTTGTAACCAAGTCAGCCAATTAATGGACAC  
CCATCTTATTCTGTGTTAGCACGAGCAGTCCACATGGAGCAGGTGAGTAAACGATTTCTTTGACTTAGATGT  
GCACGTGTACACAACAAATGTGGTCCCCTAATAACGACTAAAGAAAAAGTCTGTTTTTGAAAGGAGCTT  
GGATTCTCCCTGATTGATTTCCATAATCCATCTATGGCAAGAGAATTACAATTACCCAGAAATTATTTCA  
ACAGTCTGATCACGCAGAGATCCTGTAAATCTAGCTACTTGACTGATATTTTCTTTGTATAGAATATGAA  
AACAACCGCTGCTTAAGATGAGCAATGGTTTAATGGGAGATATGACTGGAATTTTTTATCTTTGGGAACAC  
ATAAATTATTATCCTTGTCAGTAGATGGAGATCCTTCCTGATTATGTTTCGGTATTGTTTTCTGGGTCACG  
TAAACGGTTTCTACTACGAACTTTTATGTTTATGAGTTTTATCTGCTACAAGACGTCACTCATTAAC  
TATGGCTAAGGTACGACTTCTTTCAAGCTTCTTTTTTCATAGTCTTAAAAACCCGAGTTGATCCACATTT  
CGTTTTTTTTAGAAATGATAAATCGATATATGAATGCATCCTTATAATCTGGGCTTAATGTTTTGTGACAG  
AAAGGACTGTTAGATACCTATACCAAAGCGATCAGCTCCCAATGTATACAATTCCTCAATGTCAAAA  
TGTAGCTCTGACACATCCTGTCTATCCCGACATTATATCAGTTGCTGTCAGCACGCGATTGTTGATTTG  
TTTATTCGAAATAGTTTTTAACATAACGTAAACTTAATATTGTATAATCCATTAGTGTCTAACTTCATATT  
TTTCATCGTTTTAGGGTAATTTCTCCAGGCGTAACAGTTTCTCTCCAAGTTCCAAGCCAAGGTCCTGAT  
CTCACAATGGCTACTAATTACTGGCATCGTATACAGTGACAACAACCCTATAACAGAGAATACTATCAGT  
TGTCTGTACCTTTAGATGGTGAATCTGGTTCTGGGAAGATTTGAAACACGAACAATAAATCGACCTAAA
