# Supplementary material for: Evolutionary Conservation and Diversification of Five Pax6 Homologs in the Horseshoe Crab Species Cluster
Source: MDPI journal article supplement (doi:10.3390/arthropoda2010007), 2024-03-04
Supplement: s1 [file s1]

[illegible]

[illegible]

TGTCACTCTTATACTCATGTGTCAAGTGCGGTGAAATACTATGGTACGCACGGGTTCGAACCTAGCTCGC  
CAACTCTGAAATACAGAGCGCTACTACAGTGCTAGTCCTCACCCAATCATCCCTCTATCTGCCACAGTTA  
CTGCCGAGACGGCCTTTTGTTCAGTACCAGAATTCTTAAGGTGTGGTGGATGAGATGGTAGACAAGCGTC  
TATCCATTTTTTACACGGCTCGGATTTGAAATCCCTAATACATTAATTAAGAAGAATGAGTAAAACAATCA  
AGGATTTTACTGTACGATTTTTATCAATAGCATTACACCTAATGGTAAATTTTGTCTTCATAAAACAATC  
AAGGATTTTACTGTACGATTTTTATTAATAGCATAACACCTAATGGTAAATTTTGTCTTCATAAAACAAT  
CAAGGATTTTACTGTACGATTTTTATCAATAGCATAACACCTAATGGTAAATTTTGTCTTCATAAAACAA  
TCAAGCCAAGTCACATATATATATAGATTAAACAGTCTACGAGGCTAACACGTGACCTATGCAGTTTATT  
TATCGTGTACGTGGCTGTTCTTTATGATGGGTGTGGGTGTTTTCGAGGATGAGAGAAAGATTTGATATAA  
CTATTGCTTAAAGGAAGTTTTTATTTAATTATATACAGGATAACCAACTCCAGAGTTAAACCTGACATTT  
CAAAGACTGAGGCTAATATACCTAAATTTAGTGTGTCGATGACAGTAAAAGAGGAGGAGCTTATCA  
ACAAAAAAGGACACTTTTCTATCATTGTAAGGCAAGCCCCCCCCCTTTTTTTTTTGGAAAGTGGTGGTGGT  
TAGAAGAGACTATGAGGCCTGTTGGTTGCATCTGATACACATAGGGTAAAAAACCCAACATAATTAGTCA  
GATCCATTTATATTCCTACCCAATTAGTCTTATAACCACTTTTATGATCTAAACCTAAACAGCGAATTCT  
TGCTTATTAACACTTAATGGGACCTGGCTCAGCCTGGTGGTTAGGGCGCTCGACTCGCAATCCAAGTGTC  
ACGGGTTCGAACTCCCGTCACCGAACATGCTCACCTTTTCAGCCGCGGGGGCGTTATAGTGTAACGGTTA  
ATCACAGTATTCGTTTGAGAAAAAAAATAGCCCAAGAGTTGGAGGTTGGTGGTGTGATGACTAGCTTCCTT  
CCCTCTGGTCTTTCACTGTTAAATTAGGAACGGCTAGCGCAGATAGCCCTCGTGTAGCTTTGCGCGAAAT  
TCCAAACAAACCAAAACCACTTCAATAAACTTAAATGTCTTTAATTTCTTTATGATTGTGTGTAATCAAA  
TCAAACCTAATTTAACATGCACCTACCTTATAAACTCCACCAGGTTAGAGTTTTAATAGACTTAGCATTTG  
TTTTGTATAACAGTCACTAGCGCCGCTCAAAATCTGTTGTATACATATGAATGAATACGAGTACATATTT  
TTACCTTTTAAAGAAAAACGTTCTATGTATATAGGAACGTTATTCTCTTTGTAAACAGGATATGTTGAA  
CGTTATTCTCTGTGTGAAACTAGGTGTATTAGATGTATTGAACGTTATTCTCTTTGTAAACAGGATATG  
TTGAACGTTATTCTCTGTGTGAAACTAGATGTATTAGATATATTGAACGTTATTCTCTGTGTGAAACTAG  
ATGTATTGAACGTTATCCTCTGTGTGAAACTAGATGTATTGAACGTTATCCTACATCTAGTTTTACACAG  
AGGATAACGTTCAATACATCTAGTTTACACAGAGGATAAGCGTTCAATACATCTAGTTTACACAGAGG  
AATAACGTTCAATACATCTAGTTTACACAGAGGATAACGTTCAATACATCTAGTTTACACAGAGAATT  
AGATGTATTGAACGTTATCCTCTGTGTGAAACTAGATGTATTGAACGTTATCCTCTGTGTGAAACTAGAT  
GTATTGAACGTTATCCTCTGTGTAGAGAATAACGTTCAATACATCTAGTTTCTGTGTAAACTAGATGTAT  
TGAACGTTATTCTCTGTGTGAAACTAGATGTATTGAACGTTATTCTCTGTGTGAAACTAGATGTATTGAA  
CGTTATACTCTGTGTGAAACTAGATGTATTGAACGTTATACTCTGTATGAAACTAGATGTATTGAACGTT  
ATCCTCTGTGTGAAACTAGATGTATTCCACATTCATATGCCAGCCAGAATGTTAAATCATTCGAGCATT  
ACCTATAGTTAGCATACAGCTCAATAATGTGAGACTGGACAGCTTTTCGAAAGAAATGTTTCGAGAGTCAA  
TAACGTTTTTGCAAAGAAAAATGTATTGTATAACTTGTATCATTTGTACTTGTGTAGCATTTGAATACGAT  
CAAGTCGTTTTAAAGGCGTTAGTGTATTAAAGGCAATTCTGCGGTAAACATTTACCATCGATTCTCTTCCA  
GATCAATGTATCGATATAAGAAGTTTAACTAGACGTAAGCCTTGTTGTAGGATGTACGCACGGTGTTAT  
TCTCCCTCTGTTTTACTCTCTGGGCTATAAGTAATCGGTATCTTGCTTCTGCTAACGACAACAACGAGA  
TTGCTGCGTTCCCTAGCGGTACAAATAAGCCAATTTGCGGCGGTAAGACGAGAAGTTTCCAGCAACAGTA  
GGTGGGAACAACTAATTTTTTCCCGCTACTTAACAAGCTTATTTCTCCGCTGGAAAGTGAGAAAGTGATG  
AAGATACCCAATGAATACTAGCATTCGTTTCAGAGTTACACATTAACCTAATTGAATTACACGAGTCTTACG  
GATAGTTGTACACGGTGGCCACCACGGTTTCTCCACGAACATTTAGGTATTAGTTGTTATCTAATTCACA  
GTAATATGGCTTGAAGTTTAAATATCTAGTTTCTTCGAATGTCGATTGAAGTAATCATAGATTGAACCAAT  
GTTTTGTGCGTTTAAAGGATTTGCCCTAATTAAGATGCTCATATAGACTGATTTTTTCGCGAATGTGCAGA  
AAGAAATCCTTTTCGCGTTCTGAACGAAACATTTGCGTTTTAAACATTTTTTTTTATATTGACAATGCGCCCAG  
TGCAACAGTTTGTGGCTGAACTGCGCAGTGTCACAATGAGAAACATGTAACACTTATTTTTTAATATCAGA  
GAGTTTAAAAAAAATAGACATTAAATTATTAGGGTTTTTGAACAAAAAATTAGGTCAAAAGTCGAACTC  
GAAGCTTAAAAAAAAGTAAAGAAAAAGAAATGGCATTAATAAAACAAACAAGAAATAGGTTATAAGTTGATC  
AGTTTTTACTTCGATATCATATTATTATAACAAGAAATAGGTGATAAGTTGATCAGTTTTTACTTCGATA  
TCATATTATTATAACAAGAAATAGGTGATAAGTTGATCAGTTTTTACTTCGATATCATATTATTATAACA

AGAAATAGGTGATAAGTTGATCAGTTTTTACTTCGATATCATATTATTATTTTTTTATCATTTATAAAGG  
TGGTTTTCAACAATTCTCATTTTTTAAAACTTTTTCTTCCAACAGCTGAAAGTTACGTAATATTACTATCAG  
ATAATTTTTTAGCAGTTAAGATGATTTATTAGAAACTGTTTGTAAGAACTTTAGACATGAAAGTCAATGTA  
GATTAGAACGGAAGTAAATGTGGTGTGTTGTAAATATATTAACGCATGTTTTTGTGGATCTTTAACGCAA  
AGCTACACATATGCGCTCTGTCCACTGCGGGAATCGAACTCCGAATTTTAGCGTTGTAAGTTCAGACAA  
TACATAACTGTGGAACGATGCATAATTTACTTTAACATGTTTCGTTATTAGTATCAAATAATTCGTTTTA  
CGCTTGGCTTACTAGTACTGTAATTATGTAATAAATTTTACCAGAAAAGTTGCTAATAGTCTACAATAAT  
AATTATAATTACAATTAATGATAAATAATATTAATTATGAGCCACGGGCGAACTAAAAACAAAAATTTTCA  
ATGATCACTCTGCCCTAGGTCAACAGTTGAACACTCTTAAATGATAATGTTGCCCTTCATAATGACATAT  
ACACTTAGTGTGTGTCGAAACTAGGGCATTTAATTTACCAATGTATATTTAATTCATAGTTCATCTAAT  
ACACTAACTGTGCATAAAAAAAGCTGATTTATCATATTTTTTATCAACAGCAAAACAGTACTTTTTGAAAAT  
TCCTGTTCTGCCAGACACACTTCTCGTGTCTCTTTTCACTGTGAGATTCTTCTTGTTTTTTACATTTGGTT  
TCTTATAACTATTAGATAATTCTCGTGTCTCTTTTCACTGTGAGATTCTTCTTGTTTTTTACATTTGGTTT  
CTTATAACTATTAGATAATTCTCGTGTCTCTTTTCACTGTGAGATTCTTCTCGTTTTTACATTACGTTTA  
TAATTACTAGACACTTCTCGTGTCTCTTTTACTGTGATATTCTTCTTGTGTTACATTTGGTTTCTTAT  
AACTATTGGATAATTTCTCGTGTCTCTTTTCACTGTCTTATTCTTCTCGTTTTTACATTCGGTTTATTATA  
ACTGTTAAATATGTCTCGTTTTGCCATTGGTGTGTTTACAAATTATCTGATGTTTTTTTTCTCTCTGTTAT  
CACTGTGAGATACTTCTGATGTAGTTTTGGTATAACTGTGAGATTATTTTAGTTTTATTACCTTCTTAACA  
GACATATTTCTGGTTGAACATTTGGTTTGTATCACTGTGAGATACATCTGATCTGGTTTGGTATAACTG  
TCAGATTATTTTAGTTTTATTACCTTCTTAACAGACGATTGCTGGTTGAACGTTTGGTTTGTATCACTT  
CTATACGGTTCTTCTGATTCAGTTTTGTTATCTCTGGCAGATACTTCTGATTTGGTTTGGTATCAGTGTCA  
AATACGTTTAAATTTACTTTAGACATTTATCTTTGCCAGATTCACTTCATCTCTTATCACTTTCAGTAAT  
CCTCGTTTTGATTTTTGCGGTGTTATAAATGCTAAATTCCTATTATTTTACATTTAATTTATTATCACTGT  
CTGTTATATTTCCCTTAACATTTTATTTGTTATAAATTTGAGCCACTCCTTATTTTATAATTGGCATGTT  
ACCACTGTGAGATACTTCTCGAATTAATTGTGTTTGTGTTAGTATTGTTAGATTTTTCTCGTTTACTTTTA  
TTTGTGACTCTGTAAAAATATTATTGGTTTGTGTTATCACTGTGATATATACATTACTCTGTATCAATTTAA  
GGTGTAATAACTCCTTGCTTTACTTTTAGACTTCTCACTGTAGTGTGTGTGTGTGTTTTGTACAGCAAA  
GCACACACATCAGGCTATCTACTGTGTCCACCGAGAGGAATCCAACCCCTGATTGTAGCGTTGTAAATCC  
GTAGACTTACCGCTGTCCAACCGGAGGACTTCATTTTAGTGTGAGTTACTTCTCAGATTGCTTTTTGACCT  
GTTATTATTGTGAGATATTTTCGTTTTATTTTTGAGTTTGATGTCACTGTAGTTTTACTTTTTTACTGTC  
ATATACTTTTTGGATTGTTTTTCAATGTGAGATACTTCTTATTTTACATATGGCTTATTTATTACTGTGAG  
TTACTTCTAGTTTAACTTTTTTACTGTGATATACTTTGGATTGTTTTTCACTGTGAGATACTTCTTATT  
TTACTTCTGTTTGTATTACTGCCAGTTACTTCTAGTTTTACTTAGGTTTATCTTCAATGACATTTAAT  
ACTTGCTTTACATACGAATATTTTCGTTATCACTATCAGATACTTGTGCGTTATTTTACTTTCTATATA  
TTTTTAGAATTTGTTAATTAATTAATTTGTTCCCTTCTGTGATCAACTGCAGTGTGTAACAAAAA  
TAAACCTAAAGAAAATAGCATTGAGAAGATTGGAAGTTTCCCTAAGAGTGACAATCTCATTAATTTCTA  
CTACAGACTTTATGTCAATTACGTAAATTTCTCCTATAACCAAACGAAAGAAAACATTATTTTTTTTGACA  
TTATAAGCTAAGCTAAGCTTGAATATGATAACGTGATTATGCTTCCCTAATAAAATGTGGTAGAATTTAA  
CGTTGCGATTAAATTCAGATCAAATTCAGTAAATAACAGTTGTTGTGAGCGAGCAATAGCTTCAGTGCGC  
GCATTCCTTTAAAAAGCTGCGATCCGAATCAAATCCCGCTTCCGTTTTATTTTATACCGTGGGTGTGGTAG  
GTAGCATAACTGTGATGTTTTCTGTGTGAATATGGTTTATTGGTATTTGATCTCCGCGCTCATTTCCGT  
TTCTCGTGGTACGAAAAACAGTGCTGTAATTCAGTACCGTCTATAAAACTGTGGCTCCTGTTACATT  
GCATTATTGGCGCCCTCACTAAGGCAGGAAACGGCCGTAGCAAATTGCGTTAGTTCTTAACGAAAAGCCA  
CGAGATGAGTTTGTGAATTTTGTCCCTCATATTCTAAGTTTTAAAGTGATATAACAGCGTATATAAAGCG  
TTTTGCTTGTCCCTCACTAAGGCAGGAAACGGCCCTAGCAAATTGCGTTAGTTCTTAACGAAAAGCCAC  
GAGATGAGTTTGTGAATTTTGTCCCTCATATTCTGAGTTTTAAAGTGATATAACAGCGTATATAAAGCGT  
TTTTGCTTGTGCGACGTCTGGCGTCACGTTTACTTATATACATTACATTTTTTAGAAGTAGAAGAAAATGC  
GCAGAGACTTGATAAAGATTTTTTGGCGACCTGTTGCTGGGATACTGAAGCAATATCACCTTGTCTGATT  
GGTCTATAATGAAGCCCATTTGTTTGAAGTAATCGGAACTGAAGATGTGTGGAAGATCAGAATGTGTAG

[illegible]

[illegible]

[illegible]

[illegible]



[illegible]

AAAGAGAAAGAAACACACTTGAAAAGAATTATTTGATTACAGATGTTAAGGAATGTCTGTGAATATCAGA  
AAATAATAATAAGAAAGCTTGTTTATATGTAAATATATATCATATAGGCAAACATTGTATAAAATCTAAAG  
CTTTCCTAACAATAAATTTAATGGAGGTATGGATTTTCCTTGTAGTGCCATCTGTTGTTTTATTTAGAAAT  
CTTAGTTGTTTTTTTTTATTTGCAAGATCATTTGATTTAATTTTAGTTGATCAACAATAAAACAAACAAGAC  
ATTTAACTGATAAAATATTC AACCGATTTTAAGTGAAATTCAAAGCGACTGTACATTTGTAAAGTGTAATA  
TCTGACGGTGAGTAAGTGGCAAGCGATTGCATTAAATACTCACTGAATACTGTTGTATTTAAAGTATATC  
GTCTGTCTAGTGGAAAGTGAAACGTTGAGTACTGCAGTCAGAGCTTGGCACAGTGATTTCTTCATGAAAAAA  
AAACAACAATGATGTTTTCGACAATTCTTCAAGCGAAGAGCGACTGCATTGTAATGAATACTTATCTTTA  
AATTTTCCACTTTTAATGTTAGAAAACTGATGAATAATGTGGATACTGTTCTTGAAGGTGAAGATCAGGA  
AAAAAGATTTTTAAAGATTATATTTTGTGTTGTTGTCGCTAAGCACAAAGGTACGCAATGGGTTATTTGT  
GCTGTGCCCCACCATTGGTATTGAAACTCGGTTTTTAGCGTTATAAGACTTCAGATCAATCGCTAACCCAA  
TTGTGTTTGGGGGGAGGGGCGTATAGATTATGAAAATAGGTGATACTTTTCAATTGGAGCCAGTTGAATG  
AGTAGGCTTTTGGACATATTTTGTGATGTGACTTGTGACTTTTCGGATTTTTTAAGGTCAAATACGAATAG  
CTTATTCAAAGAAGCTGTATTTTGATAGGGATTTGTTTTCTTGGACTAAAGACGGCTAAACTGTGATCCA  
GCTGGACACTGGTGCTGTCTAAAGATCAGATTATGTGGGGATTATTTTCATCGTTCAGTGTTATCTTAAT  
GAAC TTCATGTTCTGGAAGGTTCTCAATCTATTATAAACATTTGTAAAGTTTTAACCTATTGTGCTCTCA  
CTTTGGCAATTCGTTCTTTCACTCCTCATGGGACGGTAAACAAGAAAAAACTTTGGAGTTGAGAATGGA  
AGCTTATCAATTTTATTAAGGTTTCTTATTACATAGATTAGGTATTATTTTCGTGTTTTTTTTTAATTTT  
CTCTGTAATGACGTACAGAAGATCCGTCATCTAGAGAAACCGTTCTGAGTTTGGTGTACGCTGTAATAAA  
AGCTGATAATGTCAGTCTTTAATGGAATTTATGAAAAACGACATTAGCACTTTAAACAAGGCCTTGTAAGT  
GTATATCAAGCAGTTAGTAGGAGGGCGTGAGACAGCGTGCGTAATGGTCTTCATAAAATTTAAACGATGTC  
GCAAACGTGTCAAGCCAGGCGGACAATATAGACCTATATCAGGCTGGTGTACTGAGGGCAAAGCAAGCTCA  
TAGGATATTTTAAAACTGATGATGATATAAGCTACATCTACTCATGCACACTCATGCACATTTCTTAG  
TATTTCTTGTCAATGATAACGTTAATACCGTAACGGCTACATACGTAGTGTGAATGGAAAGGCAACGAAA  
TGACAACAGCAAACGTAATAATGACATGGCGCTTTGATAAATGGGCTCTATTTTCCTTTACCGTTCTGCA  
AAACCGTGAATATCAGTATGTAAACTGGGAGATTAGGCAACTTTCCAAGTTGAAGGCCAGCCTTTAACT  
TTCCTTGTCTACATTAAGGTGCTGAAAGCTTTTCGGATGCGGTGACATTAATTTGATGAATCGTGCAAAACA  
AACACATATATTCACATCATTTAGAGAGCTGGAGTTCAAAGGTGTAACATGAAATGATCGGTTATTGT  
ACTTCAAAGACGATTTTTCAAATGGAAGCTAAACCGGATGACAGTTCAGTTATGTAAAGTTCTCTCACA  
TTAAAGCTTTTAGTTGCTAAAAACAATGTGATGTATTTACATATATTTCCCTGCATGGCACCTCACAAGAT  
TTCGAAAGTAAATAATTAACACGATAAACATGATTAACAAGTAAATAATGGATAAATCTGAACCTTGTTT  
GCGAAATCTGTGGAACATAACGTTTGTTTCGTTTGTAATTAAGCACAAAGCTACTCAATGGGCTATATGCG  
CTCTTCCACCACAGGTATCGAAACCCGATTTCGAGCGTTGTAAGTCCGCAGACATACCGCTGTGCCACT  
GGGGGGGGGGGGCGAACATAACGCAGATAACTCTACGGAAATATATATATATATACCATAGTAAGCTTTAT  
TGCAAATCTAAACGAACTCTTGTGCTCAGAACCTATCGCTTTTAAAGCACGTAATTCATGTAAAAACGC  
GAGTAAGAATATATTTAATAACGAATATTCATTACTCTCTCTGATTAAACATCTTAAGTCTCTCCATGTA  
CGGATAATTATATAAGAATTCACGATGCTACACGTTTTTTTTTGTAACGCGAGTAAGAATATATTTAAT  
AACGAATATTCATTACTCTCTCTGATTAAACATCTTAAGTCTCTACATGTACGGATAATTATATAAGAAT  
TCACGTGTTTTTTGTAATTTAAAAAAAATCTAACTATCGCGGCATAATATCTAAAATCATATTC AAGTA  
TTCAGACCCAGTTGTAACCTATATTTAAAGTGTGAAAACTTAATTAATATTAAGCTCCAGTCAGTGCAAG  
TTACGCGAAACTATAAATCGACAGAAAACGAAAATTTGAAAACCTCGATAAATATAAACATCTATTTAAAT  
GAGCGAACCTTATCACCGGATTTAGTATCTTTTATTCTGATTTGTAAGTGTAGCAGTAAATAGTTACTTT  
TTTTTTAAGCCGATCTGCTACATATAATATGGCCTACAAAACCAATCAATATTATCACGAACTACTATT  
TAGAGCAACGCATTCCTTCTCGACCCATAGTCAATGGCTTCTTCAGATGTCAGGGAAGACAGCAGAAAAA  
AATGATGGTTTAATGGACTTTAGCGACATTGATTCTTGGGGTGCCGTTTGTGGCACCTCGCCCCGCCTA  
GCTCGATTCCTTCAAATGACGGAGGGGAAACATCTTCAGATAAAAGCCTTTTCTGGATGACTCTTGGAGA  
AGAGTGGTCAGCGTTTCTCGAGTTTTTCAGACACTGACGATGTATATAGATAGTGTAAACTATACATAA  
GTGCTATAGGTAGTTACAGTCCTTGAGTCACTTGATCTAATAACCGTTATGAGAGACAACGTTGAAAGTC  
CGTTATAACGTATCAATGAGGATTTTTTTTAATTATCTTATATAACCAAATTGATGACTGGTTCCATATCT

ACCTTTGAAAAATTCAAAGATAATGTTTTTTTTTTAATACTTTACATGTAACGGTGCACCTAACAGCAAGTA  
GAATTTACCTAAAATAGTGTTAGTGTGAACAAAATCCACCTCTATAAATAAGGCTTGATATTAACATTTT  
GCCCCCCCCCAGTGGCTCAGCTTTAAGTCTGAAAGATTAAAACTTTTAAAACCGGGATTTCGAGACCCG  
TGGTGGGCACAGCACAGGTAGCCCGTCGTTTAGCTTTGTGCATAGCAGCAAACAAGAAAAACAACTTAAG  
CTCTAGCTTTAATACAGAGCGGGCTACAGTTGAGAGGTGCTAGTTTTATAGCCAGATCATAACTGGTATG  
TCTTGATATAATTATTATAATTAGAGCTTTTCAGTGAAAGTATATAATGTAGTTAATATATTGTTACATG  
TTACAAGAACGTGTAACAATATATTAACCTACATTATATCTTTTATATCCAGTGAAGATTAGACCTTTTTT  
GCTCAGTATCAGGGCTCTTCAGTCACATGGACCTGATTGGTTAGCCAGCAGCGTCATCTCGTGTCTGT  
TGTCGAATTAATAAATGTTTATGATCTTTAATTTTTTTTTTTTTTACTAACTACAAAAAGTTTTATTTCT  
GTCGTTGGTGTAGTCATTGTGAAAACAACCTTGGACATTTTGTGAAAAACAACAACAACCCGAAGGGATAA  
AGGGCAGTGGTAAAATGTTTTCAAATTAATACTCACGAGAATCTCATGCTAAATCTCGCGGTTTCGCAT  
CTGCACCATTTTCGTTTAGGGTATGTACATCGGTTGTTTGTAGTTTACCACAAATATGGCATTATATAGC  
TATGAAATAAAACAAAAACAAACGTCATTGTACTTCAATATAATAGTTAGTTAGCTTAACAAGTACTAAC  
AAATTGTAATTTTCAAATGTATATATATTTGCAAGCACAGCATGTCATTTATACCTGTTTTATGTTTTAA  
CACCAGAAGGCGATAGTGGAAACAGAAAGCTCCAGCCGAAGCGACCTTGGCGGAAGCGGTGACGATGAAGA  
AAACGCAGCACGATTACGTCTGAAGAGAAAACTACAAAGAAACCGAATTCTTTTACTCCAGAACAGATA  
GAAGCGTTAGAAAAGGTACGCAATTAAATGTGATATCAAGAAGGCACGGTTCACAAAAATTGGTTTCT  
CTTAGACTCGATTGTGTATTGTTTCATTTGAAATTATTCACAACCTGCTGAATCTGTAAAGAAAAGTAAAC  
AACAAAGAAGGAAGAATTATATTAAATACATTAGCTCTAAAATTTGGTAATATTGCTCTAATTAAACGAT  
ATAAATACATACCAAAAAATCTCTTCCAAAGATTTTCGTTACAAAGTCTACTGTGAGACGTATCTCACTTCT  
AACTTACAAGATTACTATATAATGGAGAACGTTACTCGTGAACTTTTACAGCGTTATTTTTTAACATTGG  
ATCGAACCGCTGTAAACCTCTGTATTTTTTTTTTTTACCTTTTCAGAATTTGAACGAACCTCATTATCCAGA  
CGTTTTTCGCCCCGGAACGATTAGCATCAAAGATAGACTTACCAGAAGCTAGAATACAGTAGAAAGTAGT  
TTTCACTATTAACTTTATTGAACATATGGGAAAATACGTTTAGTGAGTTGGCAGCTGATTAATTAAAGAT  
TTATACATGTTCTAAAATATTAGAATATTCGGAAACTGATACATTTATATGAACCTCCAGTTTATTACATG  
AACATTTAATTTTTATTGATGGCAATCGTTTGGTCGTTAAGCACAAAGCTACACAATGGGCTATCTGTGCT  
CGGGCCACCACGGATATCGAAACCCGGTTATCGCTAGCGATATGTATTGGTGATGAAGACTCAAGATAT  
TACAAAAAGATTATCAGTCATGTGAAAAACAGAACGCATGGTTAAACTAATATATATGTTTTTTTTAAACC  
ATGTAGACACGTTTAAAAAGCAGATGGATCAAAGCGATAAAAAAGAAAGCTTTATTGTACACAATAAGC  
ATAAAAAATGACACTGTGCCAATCTCAAAAAATACAATAAAATACTGAATGATTTACTGTACAGGACAAAA  
AACCTGATGAGACTGGGAACAGTCTTAAACACTCGACGTGTTTGGACGTTTTTACTGCGTCATCTTCAGG  
AGTGCAATTTTCATCTCATCATTTTTCTTATCCTATTATAATAAACCGTTGTTTGTTTTTTTTTTAAACAATA  
ATTTTGATTTGAGCATGAATATTAATCAGATGTATTTTAAAGATCCATTTATTACACGCTCTGATCTTAA  
CTCCTCTTTTTTCTATTGTAACCTGTTTGGTCTCTGGTATTGAAATATCACTTCAATGTGAGAAATTGGTT  
CTTCACAGGTTTGGTTTTTCCAACCGCAGAGCCAAATGGAGACGGGAAGAAAAGTTAAGGAATCAGAGAAG  
AGCTGCCGAGCAAGCCGCGGCAGCTGCCGAGCTGTCAACACCACACCGGGTCGCCTCCCTCTCAACTCA  
GGTTTTCCGAATTCTTGTATCCCGGTATAGGACAACCAATGGCTAGCATGGGGGACTCTTATAGGTAAG  
CCTATTTATATATATATATATATGCTAATGTGTAACATTTTCCGATTTGTTGATAAAGGATAATAAGGTT  
AATTACTTAGCGGGCAACTTCAACTTTTACCATAAAAGAAACAAATATAGAAAATACTGTAATGTATAA  
ATCCTTTTATCATAATGTTTTTCTTAGTAGAAAAGAATGCTATATACCTTCTCTTCGGTAGAAAAGATTG  
ATGAAATGTTTCGACTGAGCTATTTTAAGCCGCGGCATAACGGCTCATTAACGGCTCTAAAAAAATGT  
TTTTTTCAAGTACAAAATTTTAGCTCATAGCTCAGTCATCATTTACCGATTTGAAATCTAATTATAGTT  
TTGAACTCAGAAGATCAAACCTTTTCGATTGGTGTATTTGACCAAGCCCAAGGTCTCGTAGATTAATTTA  
CTCAAATCTTACCTAAAAACCTAAAAGAATTTCAAGTACCGCTGCTATTGAGGATTCCTCTGTTCGCT  
ATTATATTTACATTAGCACCGTATTTTTTATCATTTTACTTTTCTACGAGGTACACCAGCTCAGCAGTAG  
AAATCTCATACCAGTTTTATACAAGATATTTTTCTTTTCCCTCAGTTCTATTCCACCGATGTCCACTTA  
CTCTATGCCGAACAATATGGCACCAAATTCCTGTCTTCAGCAGCAGGCGTCATCCTATTCTTGTCATGTTA  
CCACCAGGGAGCGCTAGAAGCTACGACCATCTTTCACTAAGTAGCTATAGCCGACCATCATGTCCTACCG  
CACAACCATATGTAATGCAGCCTGTAAATGGTCAGTTTTTCCACAGTCAACAATGGCGGTGCTGGGTCAAC

AGGTAAATAAAATATTTTTGTTTACACTTCTTTCTTTTCCGATATTATCTGAATGTATTGGATTCAATTTA  
TATAAATTTTTCCAGAAAGAAAGAAAAATACTCACGTGTGTCCGACCAATATGTATCAATCCTTTATTAG  
AGAGATAACAAGGGCAAGTAGCTATATTAGTATAAGTTTGGGGCCTGGCATGGCCTGGTAATTAGGGTGT  
TTATTCGAAATCTGCGGATCGTGGGTTCGAATCTTGTACCCGAACATGCTCGCCCATCTAGCCGTGGGGG  
CGTTATAATGTGACGGCTAATCCACGTTTCATTGATAAAAGAGTAGCACAAGAGTTGGCGATGGGTGGT  
GTTGACTAGTTGCCTTCCCTTCTAGTGTATCACTTTAGAATTGGGGAAAGAGTTGGCGATGGGTGGTGCT  
GACTAGTTGCCTTCCCTTCTAGCGTATCACTTTAGAATTGGGGACGGCTAGCGTAAATTGCCCTTGAGTA  
ACTTTTGGCGAAATTCAACAAACAAACAAAGAACAAGATATAAGTTTGTTCAGATGCTGCACTTTGCAC  
AATAAGAATGTCTGAAAAGCATTTAGGGACTTTATTTAAAGTGGCACAGAACATTTTGAAATCTTGACCT  
AATGAACGTACTGAGACGAGATTTATTCCACATTAGAAATTAGCAAATAAATGACTAAGATATACTTAGG  
TACATATAATCTAGAACAGAAAAGTGCGTTTTCGTATGGTAATGATCGTGGATTTGGCGACGCAACACAAG  
CTTCATATAAAATATTTAAGCAGGAACATTATTTGAGAGGTTTTTTTTTCCCTCTTGTAGATAAAATGTAGAT  
CTTCAATGAATATTTAGTGTTAAGTTTTGCTACCATATTATCTGTGTTACTTTCAAATATTTCTACTTTT  
ACTCAGTTTTTGTAGAAAATGTATTGTGATTGCTCGTTAAACAAGCAAACAAAACGCTTAGGCTTCTCT  
TCGAAAACAATAGGAAGCTTTATCTAAAAGGTGAACTAAAAGGTCAACCAATTTTTGACTCCATCATAAT  
GTTACAAATAAGTAAATGCCTAATGCCTTAGACAAAGGTTTTAAAGATACTCCCAAAGAGCTAGATGACA  
ACCAGTGATGAGGAGGTTCTTAGAAAATATAGGTGACTTAGAATGATGAGGGGACGTTTAGAGGATTAAGT  
GACCAAGAGTGATGAGGGAACCTGTAAAGAGCTAGACGACCTATAGTGATGAGAGGTCTTTTAGAAGATT  
AGGTGACCTAGAATGATGAAGGGACGTTTAGAGGATTAAGTGACCAAGAGTGATGAGGGGACCTTTAAAG  
AGTTAGGTGACCTATAGAGATGAAGGACATTTAGAGGATTAGTTGACCCAGAGTGATGAGAGGACTTTTC  
GAGGATTAAGTGACCAAGAGTGATGAGGGGACTTATAAAGAGTTAGGTTACCTATAGAGATGAGGAGGCT  
TTTAGAAGATTTAGATGACCTAGAGTGTTAAGAAATTGCCAGAGAATTAGGTGACCTAGAATGATTAAG  
AACTTCTAAAGAGCTAGGTGAGTGGTCCCAACCTTTTTCCAATTGAGGACCAGCTAGTTGTGATCCCA  
AAATTTTCATGGACTACTTTGTACAATATTAACAATATTCAAAAATATAATATAATATTGTAAACACATA  
CTTTAGTCACTACATTTCAAAACACACGTTTTTTTTGTGTTTTTATACTGTCTTTTGGACTGATTGAAATC  
TTCCAGTGGACTATCACTGGTCCATGGACGGGCGATTAGGTACTACTGAGCTAGATGACCTAGAGTGGTG  
AGGGGATTTCTAGAAAAGTTATGCGGCCTAGAGTAATGAGGGGGTTTTCTAGGGAGTTAGATAACCTAGAGT  
GACGAGGGGGGATTCTAGAAGGTTAGATGACTTAGAGTGATGAGACGATTTCTATAGGGTTAGATAACCT  
AGAGTGATTAGAATATTTCCAGAAAAGTTAGGTGACCTAGACTGATGAGACGATTTCTATAGGGTTAGGTG  
ACCTAGAGTGATGAGGGGATTTCTAGAAAAGTTAGGTGGCCTAGAGTAATGAGGGGATTTCTAGAGAGTTA  
AAGTAACCTAGAGTGATGAGGGTTATTCTAGAAGGTTAGATGACTTAGAGTGATGAGACGATTTTTAAAG  
GGTTAGGTAAGCTTGAGTGATGAGGGGACTTCTAGAGGGTTAGGTGTCCTAGAGTGATTAAAGATATTTCTT  
AGAAAGTTATGTGACTTAGAGTGATGAGGGGACTTTTAGAGAGTTAGATGACCTTAAGTGATAAAGTGAC  
TTCAAAGGAGTTGAAGGATCTTGCGTGTTCTTCATCCAGTGTATTAATAATCTATAGGGACAATACAGT  
GAGAGAGGAGATTTGTGAGGATAAATTGTAGCTTAACTTACTCCTATAAAAGGGATAATCTAAGTATGTT  
TCTAACTAGTAGATGTTAAGAATCAGAGGATTTAAAAAAAATTCTATTGGCAATAATAATTAAATAAAC  
TTTACTATAAAGCAACAGGTTTTTCGAGAAGGTTAGATGAAACTTAGCTCATCCTAATCAGAGAGCTAATC  
CATAAAGGCTCTCAGAAAAGTGGACTTCGTAAAATTAAAAGCCTTCTTTGATTTCTTGTGAAAAGTTATA  
TGGCACTTTTATCATGCATTTATTATAAAGGAAATACTTCCGAAAATATCAATGTGTGAGATATGCTTTTCAA  
GTTAGACTATGTGTTAGCTTACTTGTTTAAGAAACAAAGGTGTTTTATTAGTTAGTTAAGGAGTTTAATAT  
AACTACGCATTACACTTGTAATAATAAATATTGTTGTTGAATAGTGGTTTAGTCATCATTGCTTTCAGA  
CTTAAATTTTCTGAGTAAGTAGGCTTAGCAACTTGCCTTTTTTGAGTAAGTAGGCTTAGCAACTTACGTT  
TTTTGAGTAAGTAGGCTTAGCAACTTACGTTTTTTGAGTAAGTTCTTTTTATGCTTGTATATTGGGCTTA  
GCAGGTAATATACATTTATTTTCTGTTTTGTATTTCGATTTCAGATCATATTTATTGTAAGAAATACACTG  
TTTTAAATTTGAATTGAATTACACTTTATCGTTATTGTCAAGGTTTGATATCACCGGGGCTGTCTGTCCCC  
AGTCCAAGTGCCAGGACAGCCAGGAGATTTGAACATGTCTTCAGCCTACTGGCCGAGAATCCAGTGACCC  
TGGGAGCGTCAGAAGCACGTGTGGACAAAAACAAAAAGACTAGCTTTTGACGCTGCCAACGTTTTACAAT  
ATTTTGCATCACCACAATCTATGTAAATCATGGAACACATATAATTTTCATGTTGGGGGTGCACATGAAAA  
ACTTTATAATCCAGTCGAAACGAGAAGTAAATTAGGATATAGACTATCACATTTTTGAAGAAGTAGTGGA

GCCACTGGATTTCAGTGCCCTTAGGTACTTATTTAAAATGTCTATCACAGCATCAGAAAATACAAC TAGAAG  
GCACAACATTGCCGGATTGGTCAACATTAAAGCTCGTGTGCAGATGTTTACAACATATCCAGTCCAACAA  
GAACAAACGATACAAC TGGAGGATACAACATTGCCGGATTGGTCAACATTAAAGCTCGTGTGCAGATTTT  
TACAACATAATCAGTCCAACAAGAAGAAACGATACAAC TGGAGGATACAACACTGCCGGATTGGTCAACA  
TTAAAGCTCGTGTGCAGATTTTTACAACATAATCAGTCCAACAAGAAGAAACGATACAAC TGGAGGATAC  
AGCATTGCCGGATTGGTCAACATTAAAGCTCGTGTGCACATTTTTACAGCATATCCAGTCCAACAAGAAC  
AAACGATACAAC TGGAGGATACAACATTGCCGGATTGGTCAACATTAAATCTCGTGTGCACATTTTTACA  
ACATAATCAGTCCAACAAGAACAAACCATGCAACTGGAGGATACAACATTGCCGGATTGGTCAACATTAA  
AGCTTCGTGTGCAGATTTTTACAACATATCCAGTCCAGCAAGAACAAACAAT TCTAACAATCTCTGACAC  
TCTGAACGTATACACGATCAGATAGTCGTTTATCTATTGACGTCGTCATTATCCTGAATGTTCCCTGAAT  
TAAAAATATCTAGTCTTCCGGTTCTTAAGTTAAATGTTTGTATTATAATTCCTCTCTTACTATTGTCACA  
GCTTTTCTGTATAATCTTTAATTTTGGTTAGGGTTGGAAC TGTGTAGTTTTACGAGATCTACAATGAAA  
CCAAAAACATTGATTTCTCACTTGCCATATGGATCTTTTCCCTTCCGTATAAGGAACGAAATGATGTAAA  
ATTGATGTTAGAATCTCTCTTGAAATAAAAAAGCGAATTTATGTCATGTATAGCATAGTACTTATTTATT  
TAATACCAGATTTTCATGTTAGTTTTTTAAAAAAATATGTATTACAAGTTTCGAGATGCTATTCGATTAA  
CCCCCTTCAAACAGAGCAATGTTCGAAAAAAAATGAAACATTAGTGCTGAGTTTTAATTTTTATGTGTC  
AAGCTAAAACTATTATAGTGTAACGACCAGAGAGGAGATGTTTAAAAACCTTAGCAGTGCTTTTTATG  
ATTAATAAAGCTCATTTTTTTTTTGACAGAGCTAAAGTCTAGACATCAGCACATTTATAGTTAAGACATAA
