# Supplementary material for: Evolutionary Conservation and Diversification of Five Pax6 Homologs in the Horseshoe Crab Species Cluster
Source: MDPI journal article supplement (doi:10.3390/arthropoda2010007), 2024-03-04
Supplement: s1 [file s1]

>QXHF01014064.1:c459266-433297 Tachypleus tridentatus isolate BBG1  
scaffold627665, whole genome shotgun sequence

CTGAGAAAACCTGACCAGCGGCTACTCACAGATTTTACAGGTTTATGATAACAGCAGAGTGTTTCGATGAAG  
ATGCCCCATAAAGGTTAGAACATTAAATTTTTGTGTTCTTTGTCCAAAAATAATAATCTGAATATGTGA  
GATGATTTGAAGAGTTTGTGGTGACGAGAAACCCACTTGAAGTAAAGATGTATCTCAAGACGACTGGTAT  
GGGTATTAGAACTTTTATTAGAATAAAGTAGAGAACAGCATTTCGACCATCTTAGGTCGTCTTCAGTTTA  
ACATCAAGAACAACAAGAAAAAGTAAAAACAGAAAAACCTGAGGATGATCTAAGAAGGTAGAACTT  
TATTACGGTAGAAACCTTATTCTGTAGTTTATTATCATTAAGTTTTAATACCCGTACCAGCCGTCTTGA  
GAATGCATGATTTCAAGTGTTTACATTTAGCGTGTAATAGCCACCTAGTGGTATAGCGTTAAGATTAAAG  
GCTTACAAAACAAAAAGGTTCCCTAAGTCGTGGTGGATGCAGCACAGATAGTCTGTTGTGTACCTTTGT  
GCTCGACATGAAACAAATAAAATGTTTGTGTTTGTGTTGTTGTTGTTGTTTGGAAATTTTCGCACAAAGC  
TACTCAAGGGCTATCTGTGCTAGCCGTCCCTAATTTAGCAGTGTAAGACTAGAGGGAAGGCAGCTAGTCA  
TCAACACCCACCGCCAACCTCTTGGGCTACTCTTTTACCAACGAATAGTGGGATTGACCGTCACATTATAC  
ACCCCCACGGCTGGGAGGGCGAGCATGTTTAGCGAGATGCGGGCGGAATAAAATGTAGTGAACAGAACG  
AACTATTTTTTTCTTTATCTATATCGACTTTTGTGTTTAGAGCAAAGCTACATNTCTTCAGTTTAACATC  
AAGAACAACAACAAGAAAAAGTAAAAACAGAAAAACCTGAGGATGATCTAAGAAGGTAGAACTTTATTC  
TGTAAGTTTATTATCATTAAGTTTTAATACCCGTACCAGCCGTCTTGAGAATGCATGATTTCAAGTGTTT  
ACATTTAGCGTGTAATAGCCACCTAGTGGTATAGCGTTAAGATTAAAGGCTTACAAAACAAAAAGTGA  
ACAGAAAAACAGATTCCCTAAGTCGTGGTGGATACAGCACAGATAGTCTGTTGTGTACCTTTGTGCTCGAC  
ATGAAACAAATAAAATGTAGTGAACAGAACGAACCTATTTTTCTTCTTTATCTATATCGACTTTTGTGTTTA  
GAGCAAAGCTACATCGGACTATCTTCTGTGTTTACCGCGATGAATCGAACCCAAATTTTTTGTATTTTAA  
ATCCGTAAACTTACCGTTGTCCCACCGGGGGGCTTATTTACACCGAATCACTCATCGGCGGTTTGTCCAC  
CGTGAGGAATCGAACCTAGATTTTTTGCCTTATAACTGCAAACCTCACCTCCAGCTTAGGGGAGAACATT  
AATTTACGAATTATCAGTTGGTTACAAAGTGAAATTGATATATCTCTGCTCTGCATCAAACTCGAATTG  
TATTTATTGCTGTTGTAAATTTTATCCGGCCCCAATTCTTTTATAGAAAGTTGAAATACATGATTTTAAA  
TTTGCTTCAAAATGCTTTACCAACCTGTGCTTCCGTTTTCATTTATTATGCGCTACAAATTGATGTGGTT  
TATTTCTTGCTCGCTTCATCGCTTTACGATTTAAAAATCTCGATGTGATTTCTACAAATGGCTTGTGTTTC  
TATTTGACTTATCTGGAAGTTATAACGTGAGCATTGCTTTATTGTATTATTATTATGTTCTGCATAACTA  
TCTAAACGGCTTAGTTAGTTGATTCAAAAGTTATTTATTGCAAAGTTTTTCATATTAAGACGCTAGGTGTA  
AAATTTCTGTTGTTTTTTTATTCAACATTTTTTTTCAATTTGGGGAAGATTTCTCCTCGTTCTCTGTAGGTCA  
CAGTGGGGTTAATCAGCTAGGCGGAATGTACGTGAATGGAAGACCTTTACCAGACTCGACTCGTCAGAAA  
ATCGTGGAGCTGGCCACAGTGGTGCTAGGCCTTGCGATATCTCCCGTATACTTCAGGTATCGAATGGCT  
GCGTCTCCAAGATACTGGGACGTTATTATGAGACCGGCTCCATCAAGCCTCGGACTATTGGTGGCAGTAA  
GCCTCGTGTGGCTACTGCGGCTGTAGTCAATAGGATAGCCGACTACAAAAGGGAGTGTCCCTCCATCTTT  
GCCTGGGAAATGCGAGACCGACTTTTGGTGAAGGAGTGTGTAACAGTGAAAACATTCCCAGCGTGAGTG  
ATCGATACGTAGAACCTAAGGAAACATAAAGAACTCCCAAATTGTTTGCACCTGTCCATTGTTTTCGAA  
TATTCCTTCTCATATTCGATTTTTGCCCCCCCCCAAATAAATGCTTAATGTGCAATTAATAGTAATTA  
TAGTTCATTTATTTTTTAAAGCTAATGTGTTAAGATAAAGTATGTTTGAAAAGGAGGAATAATTTTTAAAGA  
AAACTGTAATAAGTAGACTGATGTTTTTCAAGTCAAGAAATGTTCTCTGTATATACTACATTCATTCCTTA  
TAACGTAGCTTATATTTGACTCTCTTCTACTCAAACTGTATGATTAGTTTTTGAAAAGTTAGCGAACTA  
ATATAAATAATATAAACAACCTAGTATCCATATCTATGTTTATTTATCCCACAAAGCTTTAAGCACGTATA  
TATATATATACCTCTTCATATACTTCGAATTAAATGCGTTTCAAGTTTGAGAAATTTGCGACTTTCATGT  
CAATAATAAATCAATATTTTGACATTATTGACATGAACGTGGGTACATGCTTTAAATTTATACTCTGCT  
CCAAACAGACCTGGACTTGTACGGTGACAACACCTTTCAAGACGGATATGTCTTTCCAATTGAATGTAA  
TGTTTTTATATTGATAACTACTCCCCACCCCTCAGTGACACAGCGGTGTGACTTTGTATTTATAACTCTAG  
AAACCCGGGGTTTCGATGCCCGTGTGGGCAGAGCACCATAGATCACTGTATAGCTTTGTGCTTAAAGGA  
CAAACGAACATAATGTTAATCCTCAAAGAGTAGTTTCGATTATCTGAACATGAGTTACTATCTTGTTTC  
ATATTAGTTTAGATTTCTTTTCTTTTCAAATTTAAGTTAATATGTGAATATACACATTGTATTTTCGT  
GTATAGCATCGATACAGGTTTTTAAAGCGAATTTTATATTCCAACATAGATATTATTGCGATAAATAAAT

GCTGCTGTGTTATCTCTCAGTGTAATTACTTTTTACAATAAATACATGTTCCCTGTGTTATCTCTCAGTAT  
AATTACTTTTTTACAATAAATATATTGATGAGGTACCTTTCTTTTAGTAGAATTACTTTTTACAATGTTAA  
AGATGTTACTTGTATAGATTATTTCGAAGTTATTTCTATAAACATCTTGAGTGTCTCTAATTATTTTTTTA  
CCCTCGCGAGGATATAATTGTTATAAGTTAAATTTGTGTGTTTTCTTATTGCAAAGCCACATTGGGCTAT  
CTGCTGAGTCAATCGAGGGGAATCGAACCCTGATTTTAGCGTTGTAAATCCGTAGACGTACCGCTGTAC  
TAGAGGGGGTGTGTGTAAGTTTTAATAAGTGATAAGTTGTTGTTTTTACTTCGTGGGTAAATATGTTAA  
ATTAATAAGCACTTTTGATTAAATTACCTAACTAGCAAATAATTTACATTAAAGCATGATAATTTTGTAT  
ATGGATACAATTATTATTTGTTGTATATACGTTTATGAGATAGTTAAAAAAATTGAAAGAAAAAATATTG  
GCGAATCGGACTACGAAAAAGATGAAAAACGCGCAACTGTTTGTGTTGTTATTAACATGAATCTACATTA  
TAAATTATCTGTCCTGTGTCGATTAGGGGTATCAAAACCCGTGTTTTAGCGTTATAATCCCGTGGACTTA  
CCGTTGTGCCACTGGAGGGCATTCAAAGTAAGGAAAACTTGAAAACAAACCTACTAAATATTAACCTGAAA  
GACAAGAGGCTATCCGCTGTGTCTACCAATGGGTATCGAGGCCAGATAAGTGAAAGAAAAATTTCTGAAA  
CATAAAACTCCATATTCAAATTTTCGAGTTTAAATGAAAACCTGTGACTTTTTTCCTTTAAAGAACTTACAT  
TGTCTCATGTCTGAAATTTTAAAAATAAAAAATAAATTTTTAGTTAAATGTTTTGTTTGTGTTGGCTG  
ATCTTGATAGGAACGTTTTCCTAATTAGCAAGTCTGTACGCACTCTATGTCTCCGGTGGATCAGCGGTA  
AGTCTTCGGATTTAAAGCGCTAAAATCGGGTTTTCGATTTCTCTCGGTTGATGCAATAGATAGCCCGATG  
TGGTTTCACCATAACGAACACACACACATGTCTACACAGTTGTATGTGGAAGAACTGATACGGACTTTA  
TCTTCAGTGGATATACCTTATAACTTTAACATGGATATAGTTTCCATTTTAGTCTAACGTGGACATAATT  
CCTAATTTAATCTATAGTAAAAACACTTTCTGATTTTTGTTTAAATATAGATTTACTTTGTGATTTAATTTA  
ACGTAGTTATACGTCATAACTTAGTTTTAAAGTGGATTTACTTCGTAACCTTATCTAAAAGAGTATATATTT  
TATAATTCAAGTTCATGTGGACGTACTTCATAACTTAGTTTTAAAGTGGATTTACTTCGTAACCTTATCTAA  
AAGAGTATATATTTTATAATTCAAGTTCATGTGGACGTACTTCATAACTTAGTTTTAAAGAGAGACTTTT  
CTATTACTGTACTAAACAGTAAGAGCTATTATGTTTCGTTTATTAGTACAATTTACAGTAACGTAAACA  
ATTACATTAAATCAAATAAAAAAGGGGAAAATGTATTTAATTTTCGTTTAAATTGGTTGTAGTTATCCACAA  
AGTTGTAAAATGAGTTATCTGTGTTCTGACCACCACGTGTATCAAAACACAGTTTCTAGCGTTGTAAATC  
TGCAGACATACTGCCCTGTCACTGGGGGGCGTGATTTGAACTATGCGGTGATAGATAACTAAATATAAT  
GGGTTAAATTAGACTTTAAATACAATGAGTTAAATTAGACTCTAAATATAATGGGTAAATTAGACTCTA  
AATATAATGGGTAAATTAGACTCTAAATATAATGAGTTAAATTAGACTCTAAATATAATGAGTTAGGTT  
AGACTCTAAATATAATAGATTAAATTAGACTCTAAATATAATGAGTTAGGTTAGACTCTAAATATAATAG  
ATTAAATTAGACTCTAAATATAATGAGTTAAATTAGACTCTAAATACAATGAGTTAGGTTAGACTCTCTTT  
ATTGCGTTTTCACTTACGTGTTTATTTTAAATTTTCGGTGTTAGGAATTCATAATTGCATTTTTTACGATATCG  
AAAGGAATTTTCTAATAGGCTTTAGATTACTTATCGTACACGTAATCAACAGTATGCCTGTCTGTGTAAG  
TGGCGAGATTTATTCAAACCAAATCTCAGATCAAATGGTTACCAACACGTAATTTATTCTACGTAAATGG  
CTCTGTATAAAGTAACCTGGTCTAATTAACCTGCACATATTATTGAATTAAATGTTAATTGTATGAGCTTT  
TCATTAATAATCAAATAACGAATTGCTGTGTCTGTTCTGTTCTTTAGTGGTATCATAAATCATAATGTT  
TCACAATTTCTTCTATGATTTTATAACATTAAAAAAAATATTAACAACATATATCAATGAATAACCGCG  
TTTGGTGTTTAAAGCCTTTTTTCTATTTAGCAGCATAATAATAATGTACTTTCAACTATTGTTGTACGAGG  
TCACTTAGCAGCATAAAAAAAAAACATGCTAAGATGCTTTCTAGCAGGCCCGGCATAGTCAGGTGGTTAAG  
GCACTCGACTCGTAGTCCAAGGGTTGCGGGTTGCATCCTCGTCACAACAAACATGCTCGCCATTTTCAGCC  
GTGGGAGCGTTATAATGTGACGGCTAATCCCACTATTTCGTTGATAAAAGAGTAGCCCAAGAGTTGGCGGT  
GGGTGGTGATGACTAGCTGTTTTTCTTCTAGCCTTACACTGCTAAATTAGGGTCCGGCTAGCACAGATAG  
ATCTCGGGTAGCTTTGCGCAAAATTCAGAAACAAACAAGCCACCTAGCACGCTCTAATGATACACTTAG  
CAACATAATAATTATATATGCTTTCAAACATGGTTATCTGAAATATTTAGCCACATAACCACCTATTTTG  
AAACATTTTTTAAAAATATGTGTCAAGATGGGTTTTTATGGTATATAACAACGCAAATCATGTATTTGGAC  
TAATGGTACTGTAATATATTGTTTTTTTAAACAATAAAATTCGTGTGTCTATGAGCTATGCTATGCTGTTT  
TTATCAGTAGCTAACACTAATATTGCCCATCTACTTAGATGAGATACACCTTAGATGAGCTGTTTCAGTG  
TTATGGCCAGTTGCTTAGATACACGCTATTAATCGCTTGACCATAGGTGGTGTGTATCCGATTAGTCC  
AATAAGGAGCGTTTCCAGTCGAGGTTTCGATGTTTGGAAAATATTCAAGGGTAGTTGAAAAAGAAATATCT  
CACGAGCATTTGTGTCACGAGCATTTGACAGGCGAATCCAACATGGCTTTAGAAAGCTTTGACAAGCGAA

ACAGCAGGCCTATCGACCGTATTAGTGACATCTTTTTAAAAGAATAAATATATATTTTTTGTGGGTTTT  
GACGAGGTTTTTATATGCTTAAGGTGCAAGAGTGTCAATTCAGGTCTGCCATGTATAGCCAGGTGGTTAGG  
GTGCTCCACGCGTAATCCGAGGGTCGCGAGTTTCAATCCCCGTACACCAAACATGCTCGCCCTTTCAGC  
CGTGAGGGGGAGTTAGGACGTGCAGTCAATACCACTATTTCGTTGGTAAAAGTGTAGCTTAAGAGTTGGCA  
GTCCTCCGCTGGTATAGCGCTAAGTCTACGGATTTACAACGCTAAAATCAGGGGTTTCGATTCCCCTCGGT  
GGACTCAGCGGTGGCCTGATGTGACTTTTGCTTATTTATCACAAATCAAGTCAAGTTAAGAGTTGGTAGGG  
GGTGGTGATAACTAGCTGTCTTTTCTAGTCTTATACTGCTAAATTAGGAAAGGATAGCGCAGATAGCC  
GTCGTGTTACTTGAAGCGAAAATTCAAAAACAAACAAACAAACAAACATTCAGGTCTATTGAATTATTTGT  
TTGTCTGAAGTTAAGCACAAAGCTACACAATGGGCTATCTCTGCTCTGCTCAACACTGGTATCGAAAACCC  
GATTTCTAGCGTTGTAAGTCCGTAGACATACGGCTATGCCATTGGGGGAGGGGCAAATAATCTTATTAG  
AAAATGAGAGGGGGCATCTTTTATATAAAATAAACAAATTCTAAACATGTATTTGGGTTTGTCCGTTTTTG  
TTGTTTTCAAGGTGTTTTTGGAAGTTTATGATCAAAATTTAACCTTTAAGTTATTTAAAAGCGTATATAA  
GACGCATATAAACTGTGCTAAATTAACAAACAGCAATTATACTAGTCATAAGACATTACTATTAAGCCTA  
TTTCACTTTTGAACACCATTTTCTTAATCTGTTTTATTTGGGAATTTCAATAATTACACTAATAATGTTC  
CTATCACGTTATATTTGGCATATTCATTACCCACGACACGTTTCTCTCGATCTAGTGTTCCTCAGGCTGG  
CTCAGATACATTCTTTTAAATCTTGAACGCTCCAAGGAAGTAGGTTAATGACATGTTGTTTGAATTGAA  
ATAGGCCCTAGTATTGCTTGTGTTTTGAATTTTCGCGCAAAGATACACGAGGGCTATCTGCGCGGCTCAGTCTT  
ACAACGAGTAACACTGTAATAATTCTTCATTAGCTTGTAGAGAGCGTACGTACGATATATGATGTGTGAA  
CATAATAATATTTATATTACAAAACAATTCACACATTTTTCACAGTATTTTGATACGCATTATTCACGTAC  
TATCGAAACATGTAGTACGTTTATGTTTTGATTACGTTGTTCTGTTTGTCCGTCGTCGTTTGTGTTATTT  
TCTAAACTACTAGCATAATACGGTTTCTGCTAAACAAGAAAGAAAGCGCGCGAAAAGAAACTAGTTTCA  
TACTAACTAATATTTAATAAAGAGTGTTAATGTATCTTTATGGTCTAGTTTTTGGGGAAGTTTTGTAATA  
CAGTTAAGTGTATTGACCACTTAATAATGTATATAAGAGTTGTATTAAGTAGTAATATTATACAACAACT  
CACGCCCCAAATAAATCAGTACAAAGGAACACCTTTTATACCAATATTAATAAATGTAATCTAACATCTAA  
GCTCGCCCTCTACATTCATACACTCAATTACACAACGTGATAAATATATGATTTGCGAATGAAATGCGCA  
TGCGTATTTTTTGACCCTAAATAAGCTGAGAAAGCCCATAGGATTTTTTATTAAGAGTAATGTTAATTTTAA  
GAAGTTACACGCGGGTTAAGGGTTATCTGTGTGAAATACTTTGCAAATAAAAACATTTAAACTGAAACTC  
AAGCCAGTCGTACGTGATTATAACGACATTGTGTTTTCAAACAACAGGTAAGGTTGTTCCGAAGCGTAT  
TATTTATATTGCTAGGTACAAGATCTACTTTGAGCGACTCTTAAAGGTGCATGTTAATTTTTTTTGTGTGT  
GTGCGTACGTGTACGTGTTGTTAAAAATTTAACAATACTCTTTTATATTGTAAAATTTTTAAAATTA  
AAAAGTTATTTTTGAGAGTACTGCTTATGTTGTTTCGACGTTAATAAAAAATTAACATTTTTTATATTTAA  
ATAAAAGACCGTGAAATAAACATATTTGAACATGTTTCGTTATTCTTTGATTTCCGAATTTGTTTTTTCG  
CGTGTTCAGTATTTTGTAAATTCTGAGCATTTTGTTAATGAGTACAGAAACACAGATGACTAATTTAA  
ACATTTATTTTTAAAATAACATTTATAACAGCGTCCCCTATTGGCGAAATTTTGTGTTGTTAGAAAGAAA  
TGCAAATTGAGTGAAATACTAGTACGTAAATTAATATATATGTATTGAAATGTCAAGTACATGCCTATAT  
ATACCAGAATATTTGACAAAAATCTAAGGCATTTTAAACAATTTCACTTAGGTTTCTTCAATCAATAGAGTT  
TTAAGGAACCTCTCGTCTCAAAAAGGATCCTCACCAGGACCTCTCCTCAAGTTTCCATGGCTGGGCCAGAGA  
CGGTTTACGACAAACTGAGGATGTTAAACGGTGCCCGAGCCGTGGCCGTGGTACCCGACGGCTACTTCTCA  
TCATTTTCACGCGGTACCTCCGCCCTCATCGCCGGTTACGTTAGGTCCTAACACCGGACTTGGGGTATCT  
GTTCCAATCGGAAACGGTCACTCAAGTCTAGGCTCGTGTGAAAGTAATCGCCATGACCACATGCATGTCA  
CAAAGAAAAGTGAGTCTAGGTATGGAACCTGAAAGTTATTATTAAGTCCTATGTATATTGTATGCACGGG  
TTTGAATGACACTCTGATATTTTGCCAATCTCGAGATCGAATCCGGTACCTCCCTTATCATTTAAGCTGA  
AGGATGAACCCATATGTGCTATTAGCAATGCAATTTTTTAAACAATTCAAGTTATCTAGGTATCGAACCTG  
CGAGTTCGTAGTGCTCTAATAACATCTTGCTAGTAGTACCTGGATTGAAATATCTATCTATCTAATATCT  
GTACTAAGGGATTAAACCTAGTATCTGCTATCAATAAATCACTTTATAAATAATTATCATATTATCTCGTTA  
TTGAATCGACAAGTATTTATCCTTGGCATAAACGGTAAACTATAACTTTAAGTTATTTTAGACATATTTTC  
CAGTTAGGGACACAAATTAGGTGAAGATGTAAAGCAATTAGTAAAAAAAATAAACAAGAACCCTTTAGTA  
AGCCAGGAAACCACTTACTAATAATTTAGTACAGTCGTATCTACCTTGAACATGTTTAAATGGGTATC  
TAAACTGTATGGTAAACGTAATTTATACGTGATAAATAAAGTTAAACAGACTGCAGTTTCGTATAAAAGCA

ATTGTACAAGGTGTTAATAGTCTGTGTCTGGTACAAGGTGTTAATAGTCTATGTCTGGTACAAGGTGTTA  
ATAACCTATGTTTGGTACATGGTGTTAATAGTCTGTGTCTGGTACAAGGTGTTAATAGTCTATGTCTGGT  
ACAAGGTGTTAATAGTCTGTGTCTGGTACAAGGTGTTAATAGTCTGTGTCTGGTACAAGGTGTTAATAGT  
CTATGTCTGGTACTAGGTGTTAATAGTCTGTGTCTGGTACTAGGTGTTAATTGTCTGTGTCTGGTACTAG  
GTGTTAGTAGCACTGCGTTAGGTTGGGCCAACTTCTATTCTTTATTTGAATTATTGAGAACCATATTATA  
TTAATGAAAACCTCAATTACAAGTAATGGTAATAAACATACATTGATGAAGACACCTGCGTACATCAGAAA  
TTTATAAGCTACGAACTTTATACATCCATTTTTATCAGCACGCGATACTATCTCCTAAAACGACAATTTTC  
GGCCGTAATCCTGACAAATATCTAAAACAGTTCGACGGTTAAGGAGATTTAATTTACTTCTGGTTCCACAC  
GTTAACCACAAAATGCTAAATAACATTATAAGTATAACCATAATTGAAAACGCTTTCACACACGCGATA  
ATTAACAATGTTTAATGATTGGATGATTGTTTGGAAATTAAGCACAAAGCTACACAATGAGCTAAGTGTGC  
TCTGCCACCACAGTTTATTTCTTCTTCGCCACGTGGCCAAACATAGTGGAATGGCTGAGGCCCTAGAC  
TCGCATTCTAAGGGCCCAATCCCTTTACCAAAAACACTTTTAGTCCTTGGAAGTGTTATAATGTGACGG  
TAAATCCCATATTTCGTGGTAAAGAGCAACCGAAGTGTTGACGGTAAGCGATGTCGACTGGCTACCTTC  
TTATACAGTCTATCACTTCATAATTAAGGATAACTCTCGAGTGGTTTTGCACGAAATTCAAAACCAAAAC  
CAAGCAACCTTTAACATGTATATGGTTTTATACACGAATTTGTTGCAACTCATTATAATAAAGAACTCAT  
TATAATAAATGTTATGTAATGTTTTCAGCCTAGATTTTAAATCAGTCTATTCACAGTTTTAAACAAGTTA  
TTTTAACCAGTTCTTAATATTTTATTGTTGAATTTGAAATAAAATGATAAACCTGTGACACCGGTGTCAC  
AACTTAAATATATAGACTAAAATCTGGGTTTCGATCCATCGCGGTGGACACAGCTGATAGCTTAGTGTG  
TCTTTGTTCTACGACAAAACAAATCTTGTTAACTATGAACGTTTGTTGTTTGTFTTTTGTTAAGCACAAAC  
GTACAGAATGGTCTATTTGTGCTGTGCCTACTACGGGTATCGAAATCCTGTTATTAGCGTTATAAACCTT  
CAGGTTTACTGGTGAGCCATTAGGGAAGGAGGGTCAACCATGAAAATAAAACGTTTGGATTAGACTAGAG  
AAAAGAAAAAAAATGTGTAGTAAAAGATAAAAAGAGAGACTTATCATGGTCTCTTTTTCAAAATCCCACT  
TTCTATTGAACATTTTTACCCAGTAATTCTCGGAACCGAATGCAAAGTCCGTTTTTTGTGACGCCCTCA  
AAATCCTACCAAAACAAGAAAGTAGATCTAATGAGCCGAAGCGTGCTACGAACCGGGGAGTTCAAAGCAAA  
CGATTACACCTTCTGGTCTTCATTGTCTCGCCTCTAGCGTCTACTGGTTATTTCAGCGGAGAAATACGAG  
CTGGCTTGTACATTTCGACTCTTCGACATCCTGCGTTGTCTAAAAGTTATTAGGAACTTTCCACCTTCTA  
AAGTCTTAGGTTGGTAGTGCTTCGTCTTTTACTTGGAACAATCAGAGGGAGTTGTTCTTAGACGCCGAT  
ATCTCCGACCCGGTAAAGTTTGGGATAAAAAGAATGGTTCACTAACTTTTTTTTTTAAGCCTTACTGATGGT  
AGAGGAGTGAGAGGAGATGGTGTACGTGCGAATTTGAGATAACTGTGATTTCTGTGACCAGAACACTCGT  
TGGCTGTATGATCGTTGCTGTTTATAAAGAACTTACACCACTCAGTCTTTGATTTAGCTGTCTCTNAGGG  
AGTTGTTCTTAGACGCCGATATCTCCGACCCGGTAAAGTTTGGGATAAAAAGAATGGTTCACTAACTTTTTT  
TTTTAAGCCTTACTGATGGTAGAGGAGTGAGAGGAGATGGTGTACGTGCGAATTTGAGATAACTGTGAT  
TTCGTGACCAGAACACTCGTTGGCTGTATGATCGTTGCTGTTTATAAAGAGCTTACACCACTCAGTCTTT  
GATTTAGCTGTCTCTGTGGCCAGCAACATTCAAATAAACTCCAATGTGAAGGGAGCTTTTCCGCTCCCTA  
ACCTCAAATGTGTCGTAAGTGGAATAAAAACAGAAATAAAGGTCACCGTTCCCTTCACTGGGTTTTCTTGA  
CCTGGAATATGGATCCACGTCAATTTCTGGCTCAGTACTTTTCCCTAAATCAGTCTTTCTATTCTATGCT  
TTGTTTCGTACATTGTGTAAGGATTGTAAGGGGGGGGGTAGGTGGTTTGTCTGAAAATTTGGAGGAAGGG  
AGCATTGGCGTCATCCATCTATAACATGACTTTATTTATTACTCGCTGGTAATAGTACTGTAAGTGAACA  
TCCTAATTCATTGTGGTAAATAGAATAATATTTTAAAGAAACACTCGCATAAACACTCAGTCTTTGTCAT  
TTAGGCCACCCGAAGATTAGTTATAATCTCTTATTTCTATGAAACATATTGCACATAAAGTGTCCCGCTA  
CATTTCCAGTTTTTGTGTAGTCTTATAGTGTAACACGATGATTGGCCACTTTTATCTATTGTGTTAG  
AAGTTTACTCACAATGGCTCATTTTTGTCTATTCAACTGGTCATGCTTTTCAAGTCTAGGGAAGACTATA  
GATATTTGTAAATAACGTACACAAGACGTGTACGGAGTAACATAAGGAACAACCTGGTAAACACGATCCG  
GAAAAGGTATTAGCGCTTAGTCTCTACAGTACGTTTTCCATTAAACCTATTTGTGGACAATCTCTTTTA  
TAAGCTATTTGTGTGCATGTGAAAATAAATAGAAAAGTGTTTTTCAGTTTCTTGGACAAGATCCTTCAAAT  
CAATTAAATTTCTTTCGGCTCTAGATAAAAATAATAATAATAATATATTATGTAACCTTATGTATATAATAA  
AAAACAAGGTAAATATACACAAGTTACATAATATATTTTCGTAAAGTATGAACTGCAATTATATTTTCA  
TTCAGAGGAACCTCCAGTAGCCCATGCGTGTCTGCTGAACCTAAAGAGTTGAAAGCAGGTTTCGGTACCA  
ATGGTGGGCAGAGCACGGACAGCTCATTGGGAAGTTTTACGATTAATTACGAACAAACAAAGGATTAGAG

GAAATTTAGAATATTTCTTACAACATCGTAACAAGAACTAATTACTCTACAGTTTCATAGGTTTAATTA  
ATTAATTTTTGAGAATATTTTAACGACCTTAATATATCAAAAGAATACAATAAATGTATATATTTCTGTAT  
TTGAATTTTATTGTATAAAGAGCCTAGAATTCTTTTGAATACCAAAGCTGACTACTACGTCTCTTTATTT  
GTTTTGAATTTTCGTGCGCTCATCGCTAGTACAGCGGTATGCCTCCGGATTTACAACGCTAAAATCAGGGG  
TTCAATTTCCCCTCGGTGGGCTCAGCAGATAGCCCGATGTGGCTTTGCTGTAAGATAAAACACACAGAATT  
TCGTGCAAAGCTACATGAAGGCTATCTACTCTAGCCGTCCCTAATTTAGAAGTGTAACGCGAGAGGGAAG  
GCAACTGGTCATCACCACCCACCGCTAACTTTTGGGCTACTCCTTTACTAACGAATAGTGGGATTAAC TG  
TAACATTGTAAC TCTCAACAGCTGAAAGGGCGAACATGTTTAGTGTGAAGGGGACTCGAACCCGCGACCC  
TCAAAATACGAGTCGAGTAAACCATTTTCGATATATATTACTAGACAGACTCACAAACGAGCGGATCGCT  
GTTGTTGTCCATGAGAAAAGGTCCAGTTATTTCTTGAGTTTGTTGATTAGTGAGTCCGTACAAGCATATAC  
AGAATAAAGAAGAGTGTTGGACCACCCTCTAAGTCACACACACTGTATATATGACTCGCATATATAATACC  
GTTATTGAGTGCTGGAGGCCCTGACATGGCCTTGTGATAGGGGCACTCGACCACCAATATACGAGTCGCAG  
GCTCACTTCCCCGTCCACAATACATGCATGGCCTTTTAGGAGCGTTATAATGTGACAGTCAATTCCTCT  
ATTCGTTAGTAAGAAAAAATTAACCCAAAAGTTGGCGGTGGGTGGTGATGACTTACACTGCTAAATTAGG  
GACGGCTAGCGCAGATAGCCCTCGTG TAGCTTTGCAGGGAATCCTTCCCAATAGAACTTAACTGATGGGT  
GTGACTTAGGAAAAACATAACTTGTGATTAATTACAAAAACAATTATCATATGGCGCTAGAACGAAAAAT  
TCACTAAATAATATAACTTAATGCAAAACAAAAGCATGTTTATATATTATTTCTTCTGGCTCGTTTCCCG  
CTAGTACAGCGATAAGTCTACGGATTTATAACGCTAAAATCACGGGTTTCGAGTCCCGTCGGTGGGCTCCG  
CAGATAGGTTGACGTAATTTTGCTATAAGAAAAACAAACAATCTTCTGGCTCTCGAAGTCATTTGATGAAA  
TTATAGGTTTGTACTTAAGATGACGTCAAATACTTGGAAAACTCGCCAATAAACAGCGAGGTAGTGATTT  
CTGTACAAC TAATACATTTATCTATCTAATATTTCCATATCATTCTGCCTGTATGATTATAGAAACGATTC  
TAAAATTTACTCGCATAGCCCTAGCAATAATGTGTTTTGTTTCAGAATTATAAACTCAATACTTTTCAG  
TGTTATTACGCAAACATAATTTTCATGCAAACAAAAGCGTTTATACACACACAGGTGTGTTTCGTGTAT  
ATATATATATATATATCTTTCACGTACAAATAAATTGTTTAGATGGTATCAGCCGTGTTTGATTGATCTG  
AAATACACTGATATATACGAGCTAGCATTTTAATAAACGTGTAAATATATATTTTCATAGTTCAAATTTT  
TTTCTTTCTAGTGATTTGACTACACTGAATATAAAGTGCACACGTGTTTCTTCCACGTATCCTAACCACA  
TCGTAATGTCTAATCAGGTCTTACTACTTTTAAATTTATCTGTCTAGCTCACCAAAAGCTCATTTTATA  
TAAGAAATATATTTTCACGCATGTACGTTGGGGGAGTTCATCCGAATCCTCTATTTTTGTAATGTAAAAAA  
TAGTCACTAACTGCTTTGTGTTTCACGTGCACACAAATCAAGTGAGTGGTCAAGATTTATTACGTAGTCAT  
TATGACACCAATGTTAACACTGACACTATATGTACGTTATTTATGGAGCATGTTATTTTAGTAGTGCGTA  
TATGTAAGTATTTTATGTCCAATGATTGAACTAGATAATATACTATGAGTTGTTTAAATTAACAATATAA  
TTCAACAATTAATAACTAGGCGGTATGTAAGTAGTACAGTACTTTATTATAACAATTAATAACTAGGCGG  
TACGAAGTAGTACAGTACTTTATTATAACAATTAATACTAGGCGGTACGTAAGTAGTACAGTACTTTAT  
TATAACAATTAATAACTAGGCGGTATGTAAGTAGTACAGTACTTTTTTATAACAATTAATAACTAGGCGG  
TATGTAAGTAGCACAGTACTTTATTATAACAATTAATAACTAGGCGGTACGTAAGTAATACAGAACTTTA  
TTATAACAATTAATAACTAGGCGGTACGTAAGTAGTACAGTACTTTATTATAACAAGTAATTTGTTGTTT  
TTTTGTTTTTTTTGAATTTTCGCACAAAGCTACTCGAGGGCTATCTGTGCTAGCCGTCCCTAATTTAGCAGT  
GTAAGACTAGAGGAAAGGCAGCTAGTCATCACCACCCACCGCCAACCTTGGGGCTACTCTTTTACCAACG  
AATAGTGGGATTGACCGTACATTATAACGCCCCCTACGGCTGGGAGGGCGAGCATGTTTGGCGCGACTCGG  
GCGCGAACACGCGACTCTCAGATTACAAAGCGAAAGCTTTAACGCGCTAGGCCATGCCGGGCCCCATAAC  
AATTAATAACTAGGCGGTATGTAAGTAGTACAGTACTTTATTATGACAAAACAAACAGATTTATGTTACC  
ACGGAACGATGATTTGTTCACTTTTAATTGTTGTTTGTGGATTCTATTTGAAAAGCCATGTAATTGTTT  
AAATTATATTCTATGTTCTATTTCCCTTGAAAACCTAATCTCGTACCATTTGTTTCAGGCCTGGCATGGCC  
AAGTGGGTTAAGGCGTTCGACTTGTAATATGAGGGTCGCGGGTTCGAATCCCCGCCGTACCAAACATGC  
TCGCCCTTTTCAGCCATGGGGGCGCTATAATATGACGGTCAATCCCACTATTCTGTTGGTAAAAGAGTAGCC  
TAAGAGTTGGCGGTGGGTGTGATGACTAGCTGCCTTCCCTCTAGTCTTACACTGCTAAGTTAGATACGGC  
CAGCGCAGGTAGCCCTCGAGTAGATTTGCGCGAAATTCAAAAAACAAACAAGCACCTTACTTTACAATAG  
ACCCCTTTAACGTTAACATGCGTTGGATGCTGATTGTCTTTCGCGCAATATGCTTTGCCTCATGATCTAA  
CAAATTAGAACCTTCCTTTAAACATTCTACTTACGGACGTAATTTGTGGAACTTTTAAGGTTATGTTTGG

AGAGGTTTGGTTTTGTTTGTATTTAGCTTCGCGCAAACTATATCAGGAATATCTGCGCTACTTATCCTT  
AATTTAGCAGTGTAAGTCTAGAAGGAAGGCAGCTAGTAATCACTACCCACAGCCAACCTCTTGGGCTACTC  
TTTTACCAACGAATAGTGGGATTGACCGTCACATTATAACGCCCCACGGCTGAAAGAGCGAGCATGTTT  
GGTGTGACGGGAGATCGAACCACGACCTTCGGGTAACGAGTCAAGTGCCTTAAGCCCCTGGCCATGCAG  
GGCCGTTTAAAGACGTAGGAAAAGAAAGTTTTATTACAGTGCTTAAATATGCAACAAACAGAAGAGAAGT  
TTATAATTTGATAAAATAGCCGTGAGCTCCTGAAGTTATAAAGCGAATTTACCCGGTCGCCCTGTAGTCTA  
TGAGCTGTGAGATTAAAGGCCAGAGAGTGGGAACAAATGTTAGTGAAGGATCTTCAGAAAGTCTTGAAAAG  
ATATTCTAGTTATGTTATCCATTAAAAGCAACATAACGTTGCTTCAAACGTTCGCCAGCTGTCAGAGGA  
TTATGAGATTTGTGTTGAACGAGTTTATTATCAGTAGGCAATCCCGACCTAATTCCTCAGGACAAACGGAG  
GGATTGAAAGGAATCCTGGCGCCACTGTCCTATTGGAAAATCGCTTTTGTAAGAAAGACTACATTCTAAA  
TAAAGCTATGCCCTTGATGGAACTTGAAAATTTTGCTGAGTATGTCAAATTCGTTAGCGTAACCGTACTG  
AAAATTGTGTTAATTTATTTTCGCTTACATAAACATTTGAACCATTGGATGACTCTATTTACGATATTTT  
ATAAGCCCAGGATAAATGTACAAGTCGTTTTAGTAAATTTATAATGGAGTGAACGTTATTAGCACAAAGCA  
ATACATTTTGTAAAATTAATTAATTAGTTAGTTATTTTAAAAATCTAACTTGTAACAAAAAACAGCTAA  
TGTCTTGATGAAGGAACATCAAATCCACATCTTCCCGATAAATGGGTCTTAAACGATTGTTTCTGGTATA  
AAGGTACCTAAAGACAAACGGAACCATCGCTGGTTAAGTCTTCGGATTTATAGTACCAAAATCGGAGTCC  
AATTCCTCGTCGGTGGACATAGCAGATAGCCTGACGTGGCTTAGCACGAAATTCAGACAGACAGACAAAAG  
TATAATGTATGATGGCTGATGACGAATAAGAACTAAGTCTGATTATGAAGTAGATGTAATTCATAAAATC  
AAATAAATCTGATTATTATGAAGTAGATGTATTTTATAAATCGAATAAATCTAATTCATGAAGTTGATGT  
AATTTATGAACCTTGATTATGAAGTGGGTGTAATTTATAAATCAAATATAATACTATAGAAAAAATTTAT  
TCTAAAGAAAGTGTTAAATATATCCTGCTGAGGCTATTATCTACGGAGTTTTCCATAATCCACTTCTCTA  
CACGAACAGTAACGCGTGTTATTGTGTACATGAGGACCTCCTACGGTATTCTATTAGTGTGATAACCTCT  
AGGCTCCTACTACTCAGGAGGGCCTTCGTCGGGCTCTTTAGGAGGAAGGGGGCTGAAATTCTCGTGCAAT  
GTTTAAAGCTAAGCAACTAGATCTATACGCTCTTTATAGAATAAATGCTACTGGTTATTAGAGCCATTAT  
CAGAGCTTTATGTGCCAGGTAGGCCTAACTAACTGACAGATTGTGATTATTGAAGAGCCACTCAAAATC  
GTCGGACACATCACACGTATAAATGACACGAGCGTTATTTTTTTTTGTTAGAATTAAGAAAAAATGTCT  
GTCTTTTGTAACTTAAGGCTACAATTTTGTGAGCCAGATTCTGAGATTTCTTCGCAGATTCTTTAACT  
AAAAGGCACATCAGTGTTATCTGTAGAACTGGCATTGTTGTTGTCGTTTGTACGCTTGCCCTCCCTT  
CTCGGGAAGAGGCAACATGGGTTTTCAAGTGCCAAAACCAATCACTAATTTCTGTTTGCAACCACGTTT  
CATAGCTTCCAGACTTGGTTCAACACTACTGGATTTTTCTAATACAGCACGACTAATGCCATTCTGTCGG  
TGGGTCTGTTCACCTATAAAATCAGTGTGGGGTGGTGGCTTATTAAATAGAAGTTGTTTTTGAAACC  
ATTAAGGAATTTAAGTGAATTAAGTATTTTTTTTTTCGTGAGATTCTGTCGTAAACGAGTTCTATGTGTT  
AGTTTTATAAGCCAACAGCTGTTGTTTTACGTGGCGTTGAGTGAAGCTGTTTATTATATTCACGTATCC  
AAAAGTTATACGTTACGAAGCTCACCATTGGTCCTCTGTAAATTTCTGTGCTTATCTATATAAGAAATG  
TTATAAATAATACAGATTACTTTTTCTTTTTTATTACAAATTTCTGTTTCATCTGTTTTTGGT  
TAGAGGAACTATATTTTCTTCGCATAAAAATCAAGAAACCCCTGTGTTTCTTAGTTGTTGTTTTTTTT  
TGCAGTTTGTTAAGCGGACATGACATCAATACATAACCAAAAGCTTTAGAATACAAGGTTGAATTATTTA  
ACCATGGGGTTTATTAATAGAACATTACATTATATCAAGTTCTATGATATATCCATCAAGGTTTCTTCC  
TCTTGATACAGCGAAACCTGTATAAATTATATATAATATATATATATATACACTTGTTTTAAATTTT  
TGTATTTCAAGCTCATTTTAAATACATTGAATTATAGTTAAAATATAGTTTCAGGTTACATAATTATTTCT  
TTATTTAATTTCTCTAATAGTAATTTTATTTATTTTACTTTAAATAGGTTCCATAGACGCGACATCTGAT  
GGAAATTCTGAAAACAATTCCTCTGCAGACGAGGATTACAGTTGCGCATGCGCTTGAAACGAAAACTCC  
AAAGAAATAGGACATCTTTCACAAACGAACAAATCGAAGCTTTAGAAAAGCGTAAAGTCTACGATTCACA  
ATTTTATTTTGAAATCTTTACATTTAAGGTGTTAGATAAATAACTTCTGTCAATTTTAATTGAAAATATC  
GTTTTTAGTGATAAATACAGAGCTTCTTTCCTGTCTTTTGATAGTTTATGCAACTGGAGTCATGTAACCT  
AACATTAATCATACAACTGATTTTCAGAAATTTGAAAGAACACACTATCCAGATGTTTTTGCAGAGAAAAAG  
CTGGCTGAAAAGATATCTCTTCTGAAGCCCGTATTTCAGGTAAGTTTGCTATATTTTGAATTTTCGCGCGA  
ATCTACTCGAGGGTATCTGCGCTAGCCGTCCCTAATTTAGCAGCGTAGGACTAGAAGGAAGGCAGTTAG  
TCATCAACACCCACCGCCAACCTCTTGGGCTACTCTTTTACCAACGAATAGTGGGATTAACCGTTACATTA

TAACGCCCCACGGCTGAAAGGGCGAGCATGTTTGGTGCGACGGGGATTCTGAACCCACGACCGTCAGATG  
ACGAGTCGAACGCCTTAACCCACCTGGCCATGCCGTGCCTATATTCTCTGTATATTCACTGCCGACTTTT  
ATCTTAATATTTTAAAAGTAAATTGAATGTTACTAATGAANTTTTTTTTTTGCAGTTTGTTAAGCGGACA  
TGACATCAATACATAACCAAAAGCTTTAGAATACAAGGTTGAATTATTTAACCATTGGGGTTTATTAATA  
GAACATTACATTATATCAAGTTCTATGATATATCCATCAAGGTTTCTTCCTCTTGATACAGCAAAACTG  
TATACTTATATATAATATATATATATACACTTGTTTTAAAATTTTTGTATTTCAAGCTCATTTTAAAAAT  
ACATTGAATTATAGTTAAAAATATAGTTCAGGTTACATAATTATTCTTTATTTAATTCTCCTAATAGTAAT  
TTTATTTATTTTACTTTAAATAGGTTCCATAGACGCGACATCTGATGGAAATTCCTGAAAACAATTCCTCT  
GCAGACGAGGATTACAGTTGCGCATGCGCTTGAAACGAAAACCTCAAAGAAATAGGACATCTTTCACAA  
ACGAACAAATCGAAGCTTTAGAAAAGGGTAAAGTCTACGATTACAAATTTTATTTTGAAATCTTTACATT  
TAAGGTGTTAGATAAAATAACTTCTTGTCATTTTAATGGAAAATATCAAACCTGATTTTCAGAAATTTGAAAAG  
ACGCACTATCCAGATGTTTTTGCAAGAGAAAAGACTGGCTGAAAAGATATCTCTCCTGAAGCCCGTATTC  
AGGTAAGTTTGCTATATTTTGAATTTTCGCGCGAATCTACTCGAGGGCTATCTGCGCTAGCCGTCCCTAAT  
TTAGCAGCATAGGACTAGAGGGAAGGCAGTTAGTCATCAACACCCACCGCCAACCTTGGGCTACTCTTT  
TACCAACGAATAGTGGGATTGACCGTTACATTATAACGCCCCACGGCTGAAAGGGCGAGCATGTTGGT  
GCGACGGGGATTCTGAACCCACGGCCGTGAGATGACGAGTCGAACGCCTTAACCCACCTGGCCATGCCGTG  
CCTATATTCTCTGTATATTCACTGCTGACTTTTATCTTAATATTTTAAAAGTAAATTGAATGTTACTAAT  
GAAAATGATAAGTACTTGTACTATTGGCACACGTCTTTCTCTAACTACACTCGAATTAGGGACTTGTGT  
TTTATGCGATTGACTAACAGCGATGATGTATGGACTGTTGCGTCTTACAGAGTAACTATACGTGTGGTGT  
TTGCTTGTTTCATATGTTTTCCATGAAAACGATTGAACTAAAAACCGAATGAGATGACTCGTTTTATAAGC  
AGGATATATAGGCAACAAAAAGTAAATTAATGTGTATATCTTTTGTTGACTCACGGATGTATTGTAGAG  
AATTCGTAACCAACCAAGTCGCAGACCCACACGTATTCTGGTGAAAAGCAGTTTCTAAAAACGTATCT  
CAAAAGCAAGTACCTTGTGGACAGTAGCATTTCCAGTTGGTAACATAATTATATTCTTGCTAGGGTATTA  
AATTAGCCAAGAAAACTTAGTTCAGCGTATTTTGAAGTAATTTTACTAACAATTACTTTAAATATATG  
TGTTGCAAACTATACTGCGATTAATACAATATTAACATGAATCACGAAGTCGAGCAATCGCTGAGTAGAA  
ATAATGTCCCGTACCAAAAAATGACAATGATAGGACTAGTTGAATTAGTTTACTTATTTTAGGAACTATGA  
TTATGATTTTATACACCCTTGTGCAAATTAATTGAAACAAGACCGAAAATTACGATTTTTTTTCAATTTT  
TTTTGCGTTTTATTTCTGAGAATCAAAAAATTACTAAAAAAAACAACATGATATGACCCCTTTATTTT  
GTAAATGCTGTTCTGACATTGTATGAGAAAAGATTAATACCTTGCTCGTCCCTAAGTTACCAAAGTCTTC  
TGTTGCAATCTATTTTTGAACTTGTTTTCTTTTTAGTTTTGGAATTAAGCAAGAAGCTCATAAGTTGTTAT  
ATGTTTTCTGTCTATCACGGGTATCGAACCCCTGTTTTTATCAATGGGAGTCTGCAGACACACCACTGTA  
CCCTAAGGGACTTTTATTTCTTATCCAAATACAACGTTATATGTGACTCATCTATTTCTAACGGTGGC  
TGAGTGGCAAGTATCACAGCTTAATACACTAAAATTCTGGTTTCGATACCCTCGGTGAACAGAACAAAGG  
GAATCCATTGTGTAACTTTGTTCTTGAAATAAACGTCTATTAAATGTAACGTGTTAAACCTTTAGAATTA  
TTCTCATTATTTTGTAAAAACGACATCACTGATTATTCTCATTATACCTAATTTACTTGTTTTTAAACA  
TTCAACAGTAAACTGGAATGTTTAATATTTGCCAAAGTAATTTGCTTACGACACACATTTTTTTTTTCAGG  
TATGGTTTTTCGAACCGTCGCGCCAAATGGCGACGAGAAGAAAAGCTGCGAAACCAGCGACGAGTGATTGA  
ACAACCAGCTTGACGTCTATGCTATCGCCACCTAACGGACGACTACCAATAAATGGATCCTTCTATAAT  
TCCATGTATCCTGCGTTAGCACAACTATGGGAGGGATGGGAGATTCTTATAGGTATGTTGAATCAAACCT  
AGTGTTTTCACTTAAATCATAATACGTTAATCCGAAAATTAATGTGGATTGTGAGAAAAAATAAACCATT  
TTTCTGCATACACAAGAGTCATACGAGAGCATTTCTCAACTACCATGTTTGTTTGTTTGTTTGTTTGAATTT  
CGCGCAAAGCTACACGAGGGCTATCTGCGCTAGCCGTCCCTAATTTAGCAGTGTAAGACTAGAGAGAAGG  
CAACTAGTCATCATCACCCACCGCCAACCTCTGGGCTACTCTTTTACCAACGAATAGTGGGATTGACCTT  
CACGTTATAGCGCCCCACGGCTGAAAGGGCGAGTATGTTTGGTGCGACCGGGATTCTGAAACCGCAACCC  
CCAGATTACGAGTCGAACGCATTAACCCACTTGGTGATGCCGGGCCTCAATTACCATGAATAACGTTGTT  
AAATTTTGTAAGCTACATTGACGTAACTGAAATCTGGTTTTTATTACATTGCTCTACATGTAATTTATT  
GTTTTAATTTGTTCCCAATAAGTCAGTCAAAAAACATTAAGTTAACTTAGATTTTCATCTGCCAACTGA  
AGTTTTAAAGTTATAACAATGTAAAGAAAACCTGTTGTTGGGGGCTGTAATTTTATAAACATGTTTTGATGT  
ACAGTTTCGTTGTAGGAATAGAGATATCACGTGGAGTTTATTTTGTGCTATTTAGGCCCATCAACAATAA

TTATCCATTATAAACCACATGAATTGTACTGTTGTTTAAACCCAGAAACAATATTTATGTATTAGTAACTT  
TACAATTTTATTTATTGTAACTCAATGACTTGCTTCTTAGCAGATTTATTAACAATCTGTACTAACAAAAC  
CTAATTTTAAAAGTTGTACACTAGAGGGAAGGCAGCTAGCCAACATCACCCACAGCCGACTTTTAGGCTAC  
TTTTTTTAGCCAACAAATAGTGGGATTATCAGCATATTATATCACCCCACTGATGAAAGGGCTAGCATG  
TTTCGAACCTCTCAACCTACAGATAACTAGCGCCGTAATGATCGCGCCAAACTGAGGAGTGAAAACCATGA  
CACGTTTATTTATTTTTCACAGTTCGCTCAACAACAAAAACATAGCGGTAGCTATAAAGTTAGAAA  
CTGATAATTA AAAACAAAGGGGTCCGGCATGGCCAGGCGGTTAAGGAGCTCGACTCGTAATCCGAGGGTC  
TCGGGTTTGAATCCCCGTACACCAAACATGCTCGCCCTTTCNCCCCACTGATGAAAGGGCTAGCATGTT  
TCGAACCTCTCAACCTACAGATAACTAGCGCCGTAATGATCGCGCCAAACTGAGGAGTGAAAACCATGACA  
AGCTTATTGTTTTCACAGTTCGCTCAACAAAAAACAATAGCGGTAGTTATAAAGTTAGAAAAC  
TGATAATTA AAAACAAAGGGGTCCGGCATGGCCAGGCGGTTAAGGATCTCGACTCGTTATCCGAGGGTCT  
CGGGTTTGAATCCCCGTACACCAAACATGCTCGCCCTTTCAGCCGTGTGGGCGTTATAATGTGACGGCC  
AATCACACTATTTCGTTGGTAAAAGAGTAGCCCAAGAGTTGGCGGTGGGTAGTGATGACTAGTTGCTCTCC  
CTCTAGTCTTGCACTACTAAATTAGGGCCGGCTAACGCAGATAGCTCTCGTGTAGCTTTGCGCGAAATTC  
AGAAACAAACAAACATTAGCCAAAAATAATGTGATGTTTAACTTTTACAGTGTTCCTCCAGTGTCTAG  
CATGGCGTCGAATCATTGTCTACAGCAACGTGATCCTTCGTCTACACTTACATGTTCCATGATCCGATC  
ACTCTAGGATCGTACTCTCGACCTTCTTGTACACCAAGTCAGCCAATTAATGGACACCCATCTTATTCTG  
TTAGCACGAGCAGTCCACACGGAGCAGGTGAGTAAACAATTTCTGTGACTCAGATGTGTACATATACACA  
ACAAATGTGGTACTCTTATAACAATAAGTGAAAAGTCTGTTTTTACTTGGATTCTCCCTGCTCGATTT  
CCATAATCCATCTTTGGCAAGAGAATGACAATTACCCAGAAATTATTTCAACAGTCTGATCACACAGACA  
TCCTGTGAATCTAGCCACTTGACTGACATTTTCTTTGTATAGAATATGAAAACACAACCGCTACTTAAGA  
TAAGCAATGGTTTAAATGGGAGATATGACTGGAATTTTTATCTTCGGGAACACATAAATTATTATCCTTGT  
TACTAAATGGAGATCCTTCTTGATTATGTTTCGGTATTGTTTTCTGGGTCACGTAAACGGTTTCTACTACG  
AACTTTTATGTTTCATGAGTTTCATCTGCTACAAGACGCCACTCTTTACTAACTATGGCTGAGGCACGATT  
TGTTTCATAATCTTAAAAACCAAGTTGATCCATATTTTGTGTTTAGGAAATGATAAATCGATATATGA  
ATGCATCCTTATGATCTGGGCTTAATGTTTTGTGACAGAAAGGACTGTTAGATACGATTTGTTTATTCCA  
AATAGTTTTAACATAACGTAAACCTAATCTTGTATAATCCACTAGTGTCTAACTTCATATTTTTCATCGT  
TTTAGGGTAAATTTCTCCAGGCGTAACAGTTCCTCTTCAGGTTCCAAGCCAAGGTCCGGATCTTTCAATG  
ACTACAAATTACTGGCATCGCATACAGTGACAACAACCTATAACAGAGAATACTATCAGTTGTCTGTAC  
CTTCAGATGGTGAATTA AAAATTTGGTTCTGGGAAGATTTGAAACACAAAAAATAAATCGACCCTAAAA
