# Supplementary material for: Evolutionary Conservation and Diversification of Five Pax6 Homologs in the Horseshoe Crab Species Cluster
Source: MDPI journal article supplement (doi:10.3390/arthropoda2010007), 2024-03-04
Supplement: s1 [file s1]

[illegible]

[illegible]

TGAAAAAGTAGCAATTGAAATCTTAATTATGAACAAGTTTGTGGCTATAATCTGACCTAAAGAAAAATAT  
TAGTTCTGAAAAATAAATTGTTTTGATATAAGTTTAAAAAATATTGAACAATTGATTCATATTACAAAAC  
ATAAATAGTCCCATATTGATTGTTATACGGTGTTGAGTCACATTTTCGTTGGTTTTAATAATTTCTTTG  
AACATAACAGGTGCGACTACAACCTCTAGTAAAACAAACCAATATATACATATAAGCATTTAGAATCTAT  
AGAAGTTATATTATTGATCAGCACCTACATTTAAAGTTTCGGTTTAAGGTTTGATGAGCATCCCGTGGCCA  
ATGAATATGATACAAATTACATAGAACACGAATATATTTTTCCCGAAAGCTTTGTTTTATTTGTTTTGA  
AAAAAAGATGATACAAATATGAAAAAGAAAAGTCGTTGAACGATTGAAATCGATATGTCTTATTTTAA  
ACAAATTCGTTGATTTCTGAGAACCAGTATTTCAAAGAGCTTAGGCAAATGCAGTCAGAAGTGATGTCC  
AGTTGAAAAATACTTATTGATCAAAATGTTAAAAGACATGGTTTGGGTCATGAGGGGGGTAATAAGGTTTT  
TGCTGTGTCGCTTAAACCTAAGACGTCTACAGTTTATAATTTATCAAACAATAAACTAATATGATCTTGC  
ACCAGTGTACACCTAAACTCACTGAAAAGCTAGATTATGTGTGAAAACCTAAGTCTTGTCTGATGACGTTAA  
AAGTTTTCTTCTGTGTACGTCTTTTTTTTTATCAATATCTTTGTTTCATTTAACGATATTTAGAAACGAG  
AAAGATGTCATGTTTAAAGATGAAGTGTTTATCGCAAAGCCACACATTTGCCATATGTGCTCTGTC  
CCCCCGGGGAAATCGAACCTCGGATTATAGCGTTGTAAGTCCATAAACTTTCCGCTTACCTCTGGGAG  
AGAGAGGGTGTTGGTAAGCTTAGATATAGTTAGAGAAAAGTGCAGTCAAACCTAATGCGTATTTGTTTTG  
TTTTTAATTATATAAGCGCTGGATCATCTAAATTAATCCGAGCGTGGTGAAGTGTCTGTCGTCGTGACC  
GTGGACTCACGAATTCGGCATTTAAGTGCCGTTCCGCTGAAAAAAAAAATGTAAATTGTGCTCTTTAC  
TTCGTTCCGAGTCATGGGTGCGTTGAGTCAGATAATAGTGAGTGTGTTGACTAGCTGCCCTCCTTCTA  
GTCTATTAATCAAAATCAACGACGGCTAACGCAGATATCCCTGATGAGCTTTTCGCGAATATCTGAAA  
ACAAAACAAATCATCTGACTTGCAGTTTTTAAAAAGACAATCTCATAGAATATATCAAATCTGTAAGAAAT  
ACCCATAAGCTGTAACAATTCCTATAAAGTAGGTACAATAGGTAAATTCGTAGTTAAGGTGTACCTTTC  
TCTCTCTCTATGAAGGGCTTCTCCTGTACCCATTGCCAACATTCTCAATGCAGTAAATGCTACAAATGT  
TGTAGGAGAAGCAACTATTTTCGCATGAATCGAATGATCTCGCCAGTCTCGCCTCCTTGATTTCAGGACA  
AACATGTAAAAAGAGAAGCCTGGTTGATTATTTACATTTAAAGTAGATATGACAGGTGAAGCGCGAGGA  
AACCATGGAAAAGTGATCATACAGTAGGGTATCCACTACATGTTTCGTGCTAAAAGCTTTTATTATTTT  
TTTAAGTACAGTATAAGGTTTCGAGATTTTCAAAGATTAGGAAGCCAAGGATTTCCACCTAGTTATGTA  
TTGCAGTTGTAGTATTTATAAAACGTTTCTCAATATCCTAAAGTTTTAACTTGCACAGTCGTAATTCCT  
CACATGTAAACATGCTTACAATCCTTTAAATAGAATCAGCAAGTAAGTCTATAAACATGATTACATACTC  
GAGTAATTACATCGGGAGCGTGATGTTATTTTGAGCAAGGAAATAGCTCCATTTGATCTATAACTTTGT  
TAGTACAAATTGACAGTGCTTCTCTAGTGGTTTAATGGTAATAATGAGGGACTATAACATTAAAAATCACA  
GTTGGTCCAGCGCAGATAGTCGATAGTTTATCTTTGCGTTTTAAACAAACAAATTAGTAAAAATACAAAGA  
AAGGAATGGACTGTACGATTTTCAGGTTACGATGGGTGCTCATTATCTGTTGTTGTTTTTTCTTTCA  
AAAATGCATAACATTTGCATAATAAATTTAAGCTTGCAGTTAATTAAACAATACTTAAGTACGTTTATT  
TTAACCTAAAATTACCGATAGCGGTCTTCCCATCTCCTTTTTAAATCACATCTCTTGTGCGGTACATAA  
ATTTGTCTTTTAAAGGTCCTTAGTAATTTGTATGTAAACACCAATAATTTTAAGAAAAATACTATCAGTA  
TTGCAATTAATATTAAGTACTGCTGGGTTCTCTTATGTGCTTTACGTAACAAATGAGCGACTTCATC  
CAGTGTTTTTTGTTGAGTTCCCCCTCACTAAGTGTCTAACAGGTAAAAACATAAAATTACTCAGCATGAT  
GTATACTGCAGTAATTTATTGCATTCCACACTAGACGTGCCAGCCTTTTATACATGTGAAAAATAACTCT  
AATTCACACTAGACGTGCCAGCCTTTTATACATGTGATAAATAAATAATTCACACTAGACGTGCCAGC  
CTTTTATACATGTGAAAAATAACTCTAATTCACACTAGACGTGCCAGCCTTTTATACATGTGATAAATA  
AATAATTCACACTAGACGTGCCAGCCTTTTATACATGTGATAAATAAATAATTCACACTAGACGTGCC  
AGCCTTTTATACATGTGAAAAATAACTCTAATTCACACTAGACGTGCCAGCCTTTTATACATGTGATAA  
ATAACTCTAATAATTAGAGTTATTTATTACATGTATAAAAGGCTGGCACGTATAGTGTTGAATTAGAGTT  
ATTTATCACATGTATAAAAAGGCTGGCACGTCTAGTGTTGAATTAGAGTTATTTATCACATGTATAAAAG  
GCTGGCACGTCTAGTGTTGAATTAGAGTTATTTTTCAGTGTTATAAAAGGCTGGCACGTCTAGTGTTGA  
TTGGAGTTATTTTTCACATGTATAAAAAGGCTGGCACGTCTAGTGTTGAATTAGAGTTATTTTTCAGTG  
TATAAAAGGCTGGCACGTTTAGTGTTGAATTCTCCGAATCTATTTTCTAATAATTTTGCAGAGAGTAAA  
ATGAGTCCAGGGCTAAACGTGTGGTGGCAAACTGTTATTAACAACATTTCTGAAGATAAGATGATTATG  
AGCTTAATAGTGATGAATATACGACAAAAAGATATAAAAGCGAGGAAGATCATTTATCTGTTGATGAAAA

TAGTTGTGGTATGAATATCAGGTTGCATGATAATGAAAGTTATGATGACATTGATAACGAACTGGAAGTG  
TAAGTTTCTAAAAATAACGCAATGGACTGGTTGGTTCACAACATTAACACAGGTGATCATCTGCAAATGT  
TTTCAAAGAAACGCCAGCTTCAACTAAACATGCAAGGGGAACTTACACAACATTTTCTATATTCATCT  
ATTCATAAAACAAGAGTATTATGGGAGAAATACTGAAATGAACAACAAGGAAGGTGAAGTTATATGAAGAG  
GGAAATGGAAGCATTTGGTGTCTAACGAATTGCAGTGGTACTTCGATGTGACAATGCTAGCTTGTGGTTA  
TAAATCAAAGAGAGAAAACAATCGAACATCTTTGGAATGGAAACAATGGTAGACCAAGTTTTCCACAACCT  
GTGGCACGTAATAGTTTTAAACAGATAATTCTGAAGAGCGACAAAAACAACAACAAGAACAACTTTA  
TCCTATTAAAAACATATTCAATGAATGGGCGCAGATACTTCAGTACTGTTAGATAACGTGAGAGAGAAACA  
AAGAAGAAGAACAGTGAACATTTCGAAAGCGCTCGAGTTTTGGGGTTTTCGTTTGAAAACCATTACAACCTT  
TTGTGTTTTGATCCTGTGCGCTAGCTTCTTAATCAGAATCAGATAAAGTGCTCATTAAGATAAACTATTCA  
CAGATGCCTGTTCAAATAATAAATGTATTCAAAGAAAACGTGGTAAATATTACATCAAGTTTGGGCTTGT  
TGGGCTAGTGACGCATCCAAGTTTATAATACGTAAGTTTATACAGGAAGAATAATGGCCAAGAAAAACAAA  
ACTAAGGGGAAATAAGTGCTGTATTTTCAACTGAACAACCGTGACACACACGCACCTGAGCTGTGTGTT  
CAGATGAGCAAGCCTGAATACAAACAAAAGTGCTGTAGTTTAAATGAGCTAGTTTGACACTAAAAAG  
GAATGCTATATTTTAGCTAAACTAATCTGCATAGCATGTATACAGATACATAAGTTTGTTTTTATCAGA  
GGAAGCCTTTCCAAACATGCACACACGCCATATTTGTAAGTGAAGTCTGTATATATACACACATACA  
AATGCGCTGTATTTTAATTGAGGAAACTTATATATATAAGTCTGTACACAAAATAAGTCCTGTATTTTT  
AACAGAGAAATCCCGTAGACACATACGTGCTTTGTGTTCTGTTTAGGAAAAACCTCTGTACTAAAGAAA  
GAGAGACTTATTTTCAGATATAAGTACGTCTGATAAAGTTAATATAGAAATTACTTCGTGGTTTATACGTT  
ATGGAAAGTCGTGTAAGAAAGTAGACAATGACTAAGATACAGAAATGTCAAGAGGAGTGAATATTCGAGA  
ATACCAGCTTCTAAACCTATTCTATATATATCCATCCTACGTGGGAACCTTGTAGCTGTTGGTATAGGA  
GAAGAACAGCCAGCGACCTTACTAGGTTTGGAGGCACAACCACGCCATATCCACAATAGGCCGAAATATA  
TCGTCGCATTGGAAGCAATGCCAGCTTTGAGAAAATAATAGCTTGCTAGAGCATAGAAAATAATTACAC  
ACACACACACACACACTTACATATATGTTACGGAGGTAAAAAGCACGTGGTGTAGAGTAGCTATGGGA  
ATATTGAAAGTGAGAGTCCATTAATCATCTTCTAATTTTCATGCAGTAAGAATACATACATACATATATAT  
ATATATATATATAGAGAGAGAGAGAGACACACACACACAGAGTGGGACGAAATATTGCCAGAAGAC  
TAATTAAATATTGACATGAGTTTTTGTATGTATAAAGACTTGAAAACGGTGTATATTTGTATATACAT  
ATATTCACATGTGTACTTATTTAAATATACATACACATATGCATATTGGTATCTCTATGTAATATAGTAC  
TTTTGTGTCAAAGAAAAATCAAAACAAAGTACACACTCTTCAGAGAAATTACACACCATCTTCTGATAAG  
TGCTTTTATCTCGGTTTCCCGAAAGACTTCTACCAGGTTGATGTCTGTGCACCGATCATTGATTGTTACT  
AAGTATATATACTTAGTATAGGGGATTTAGTGCCCTGAGCTATAGTGTATTTGAATCAAGTAAAGAGAGG  
CTTTGTGTATGTGTTTTGTGCTTCTTTTTAGAAACCTAAGTAGCACCTTGTCCCCCAGCTAGATTTATCT  
CTTTACATTAAGTCAATGTCTAAGTAGACGTTTAGATGTTTAGATTTATAAGGACAAGCACCAATACTTA  
TGGAACACTGGGACACTTAGCTAGATGTAGTCAAAATACGCTGTTTATCTCACAGCATTACAAATTTTC  
ATGTAAGATCAGACATACAGCTGCTTGTCAAATAAGGTTATTGCCAGCTCTACGAATATATATGTTATTC  
GTAAGTGAAGGCTAACAGTAAGAACAGGACGAAGAAATCTCCTCACATATAACTTGCTTGATTCTTGATC  
AACTCTGAACGTCCTTCACTCAGTTTACAAAAGACACGCCCATTTACCAACTTCATCTAAGAAACCTTT  
CTCTCGCGAGGCCAATGAGAGCGTGGTTTTGTGGAACAAGTGCAGTGTGTTGTGAAAAGACTACATAAGCAC  
CGTGCAGCTGATCCAGAACGAGCAACTAAGATACAAATAATAGCTGTTATTTGATGTAAAAATTTCTCCTT  
GGAAGGCTTTCAACACTACGTACACATAACCTTACTAGCTTAGCGGGGGGATGACTTTATTATCAGTGTT  
TCATGCAGGTCACATTTCTGGGGGGTTATTATTTCAAATAATCTACTGCACCTTAGTCACTTCAATTGTAA  
AACAGTAATCGCAAAGTATTTTCATCAGAAAGTTGTCTCACTAAAAGAAAAAAATTTAGTTGAAGGGTA  
GTGGACTGATTTTTAGATAAAATCCCATATGCGTTATTTTATAGACAGTAGTTATTGTCATAGAACTTAA  
AGGTGATCGTAGGATCTTGAATGCATAACAAATATGCAATAGGACTCTTTACACATTGCAAATGTTATG  
TAGCAACAAGAGCTGAGTCATGGAATATCGTTAAACAAACTGAACTTAATTACAACATTGATTTAGATA  
TGGAATATTGTTAGCGAAACTGAAACCTAATGATAATTACAATTTACATGTGGAACATCGTTAATGAAAC  
TGTAACCTTAATGATAATGAGGATTTAGAAATGGAACATTGTTAACGAAACAGAAAGTTATTGGTGTAAAC  
GAGTTAGTTTTGCAATATCGTTAAGGAAAAATTTAAATGAATTGTAAGCCAAGCATTTTAAATGACACATCT  
TATTAATAAAAAATGAATATTGAAACTTAGAACCAAAGTTTCCATGGTATAAATGTATTTACTTATTCCAT

ACGTGCTAACGAGACACAACTAATGCAATTCAGTGTGTTTTTAAATAAACATCAAGTGATTATAGTTATG  
TTTCTCACTATAAGGGAAAAAAGTATTCTCCTTTTTCAACAACCTGGCGCGAAAAACATCACTACTTTAAAC  
AAGTCCTTTATTAACAGATGCTTACAATTATCCCTTAAATCAGGTGTGCAAAGCCCCCTCCCCTCCTACC  
CCGTATGTCAATCTAAGAAATATAGCACCTGCTGATGATAAAATGTTTTCTCTTGTTGCTTTATTTTAT  
TGAAATCCCCGTGGAATAGTAAAAATCAGGTGTTGGATCCAGTACATAAAGGAATATCGTTGTATATA  
GAAATAAAGGACTCTTAATGATAATAATAATTTATCTATTGAATGTGGAAAATGCAAATGAACTTAATG  
ATAATAACAACGTTTCTTTGGATAAGTTTTAATTAACAGGTATTGACGACTCTTCCTCAATATCAGGTAT  
GTCAAGCCTACATGCCAGTCTGAGAAATTATGCATTCAAATAGTTAGTTATCGTTATAATCGTAAATACA  
ATTATTGTCAACGACTTAGAGCATTTAGTTTGAAATGAAACTTTAAATCATTTTGTGCTTTGGTTGATA  
TGCAGTTAATACCATTTATTATATATAACACCAGTGGGGTCTGTGGGTGTTATTAGAGGCCCAATCCTA  
TTATTCAATTTGAGTAGCCTAACAGTTGGCGCTTAGCGCTGTTGAATACTGCCTTCCCTCTAGTCTATTA  
GTTCAAACCTTTAGGACATCTAGTGCAGATAGCTCTTGTTGTAACCTCTGTGCGAAGATCCAAAAACAAACAA  
ATAAACATACAACCCGAAGGATCAAATATGATAAACTAGCTCAGATTACCTTATTTTAAATAACACGAA  
TATTCAGTTAAAAACGAGCATCTAACCTGAAATTTAAATGTTCAATTGATTTTTGGGGATATAATCTT  
GGCCTTTGTTAATTTACTATATTCGTATGTGGTTTGTATGATTTTTGCTTTTGTAAAGCACAAAGCTACA  
CAATGGGCTATCGGTGCTGTGGCCACCACAGGCATCGATAACCGGCTTTTAGCGTTGTAAACCTTCAGAT  
TTACCCCTGAGTTGAGGTTTTGTAGGAATGTTTATATGACATTCTCGTTGTAGAAGTGAAACGTAAACAG  
TTGTAGTAGAAAGACTGGACAACAAAGAGTATTTTTTATCACTTTTACGATTATAAAAAATTATGGCTACT  
TCACCCTAATTTCCCTAACAAAGTATTTTTATTAGAAATTAAGGATGAAAGAACATATTTAACAGCCGCTATT  
ATTTGAGTAAATAAAATAAAATTATAGAGATGAAACTTCTTAGTGATATTAGAGAAGATCTATGTTTCCA  
TTTCAGGGTATCATAGTCTAAAAGGTCAATCACTTTACTAAATAGAGAAGATCTATGTTTCCATTTTCAGG  
GTATCATAGTCTAAAAGGTCAATCACTTTACTAAATAGAGAAGATCTATGTTTCCATTTTCAGGATACCAT  
AGTTTACAAGGTCAGTCACTTTACTAAATAGAGAAGATCTATGTTTCCATTTTCAGGGTATCATAGTTTAC  
AAGGTCAGTCACTTTACTAAATAGAGAAGATCTATGTTTCCATTTTCAGGATATCATAGTCTACAAGGTCA  
CTCACTTTAACGTCATTAGTATCCATTGAGATTGATAATAAGGTTTCTTTAAATACTCAACAAACGCAA  
AAGAAGAGGTTCAATAAGTACGAAGTCTGTGATATAATCATTTAAATGTCTAAAGGCTAAGACGGTTTTTC  
CACCACCTAAAATCGTATGAATAGTAAGATATTAATATCCTTTGTATCCATAGCAGATAACTGATGTGGG  
AAAAGTACTCAGAAAAGTGGTCTAAGCCAACTGAACTACGTTAAGGCCACCTTCGTTAAACAGACAA  
ATAAAAAGATAGATGCATTATGTTATGAACCTTGAGAAATACATTACCTGTAATAATTTTCTGATTTAAAT  
CCACGGGTTTTTTTTTCAGGTTATATACTTTTTTCCGCAAGGGCAAATTATCCCTGGTAGGATCTGATGTAT  
GTATAGGATATGAGGTATAATGTGTTTCAAAATTACTTAAGCACTTCTTCTCGTGTGAGTACCTATATTG  
TAACCTTAGCAGCTTCTTATGGCTAATGTATTTTCATAGCTATATACAGTTTTTCTAAAAAATAAAAATA  
ATAATAAAAGAAACGAAACAGTTTGACCGACAGCATCGGTTGGGAAGCGTAAAGGCCATATTTTCATAGG  
GAAGAAAAGAAATCGATACTACCACACAGTGTTCAGCGGGAAGTGTCTTGAGCAGAACGATAAGTTAAG  
CCTAATTCATACAGAAGACCGATTTGTTTTAAATTGGTGAGACCATACAAAAGGACAGATCGCGTTCTGA  
GCGAATTTGTGAGCTGACATTTCTTTTTAAACGTTCTTTTCAGTATTTAACATCTGTGTGAAATAGAGAG  
AATATTTCTACAGCTATAAGAATGAGGACAATCAAATGTTAAGGATTTTCAAGAATTAGAAGACGCTATGA  
TAATAGTATTTCCAACCATACTGTGTTTCGCTGTATGTATAGCCGGAACGTCAGGTTGAAAGTGGCGTTCA  
CAGTATAAAAAATCATTTGTTGTAACAAATGGCTTATATAAAATAGAGTTACAACCACTGATCTGTGTATTAT  
AGCCCAGCCGCTTGATGAGCTCTGAACTGAGCGAAACGCGTCGTCGGTTATAGATACGGTAAACATAGC  
GTGGTTGAAATACTATTATTATACACTCTCCTAGTTCTTGAAAATCCCTAAAAGACTAGATATAGAATGC  
AGTGTAATAAAATATAATAGGCCTCATACTAATGTCTAATTACAAGTAATTTAATTACACTTTTGCTTCG  
CCAGCTTCAGTAAGGCGTTCTCACCATAAAAAAAGTAATTAATCAATTTTAAGATAATATCATCATTA  
TTGGGAAAATAAAATTAAGACATGTCTTTTTAAATGATACAGTTTTGTTTATGTAATTCTAAGTTTTTCAT  
TGTTTTTTCATTTCTATTAGAATTATAGAAATAAATACATATGAAGATTTTTTTTAAATTATATATATTATA  
CAATTAAACATTTTTATTGGTAACGGTTCTCTATGCTGGATATTAAAAATACCAAGATTTTCCATGTCCT  
GTGAATTAGGCAATGTTCAAAATCGCGTCTCTGTTTTTGGGCAATTTATTATCTAAGAAGGTGGCAGGT  
TTCTTGAACCTGATTGATAGCCTGATTGTTTTTAGTGAAGATTTTGTGTTGGTAATCGTGTGTTTTGGAAAT  
TATAACCCATTTAGTTTTGATAGAGATAAAAAAACATCTATTTCTCAATCAATCCAATACATATAAAAGT

[illegible]

GTTATCACCAAAATATCTGTTCCCTTTGAACGCGGCACAATGCCATGTTATTATCACAATATTTGCTCTCT  
GGAACACGGCATAATGCTATGTTATCACCAAAATATCTGTTGCTTTGAACGCGGGACAATGCTATGTTAT  
TATCACAATATTTGCTCTCTGGAACACGGCATAATGCTATGTTATCACCAAAATATCTGTTCCCTTTGACC  
ACGGCACAATGCTTTGTTATTATCACAATATTTGCTCTCTGGAACACGGCATAATGCTATGTTATCACCA  
AAATATCTGTTCCCTTTGACCACGGCACAATGCTTTGTTATTATCACAATATCTGCTCTCTGGAACACGGC  
ATGATGCTATGTTATCACCCAAATATCTGTTGCTTTGAACACGACACAGTGCTATGTTATTATCACAATA  
TTTGCTCTCTGGAACACGGCATAATGCTATGTTATCACCAAAATATCTGTTCCCTTTGAACGCGGCACAAT  
GCTTTGTTATTATCACAATATCTGCTCTCTGGAACACGGCATGATGCTGTTATTTTCACAATACATTTTC  
CCTGTAATACTATTTTCACGCGAAATACTTTTAGATTGTTAGAGGAATAGTTTTTCTTTCTAAAAACCTT  
TGTTTTTCTTCTGTGACTTTGTGTTATTTAGATTTTAGTTTTAAGCCATGTTTTTTGAAGAAATGTACAAA  
TATAAGTAATATCAAAACGTAAAGATGTGCTATCAATTTTGTTTTCAAACCTTCTGACCAATGTTTGTCCA  
ATAAAATGTGATTTGGTTCGTTAGAATTTTAAATAAGTTTTATTAATATGAATTTTTCTCAGTTGAGTGGT  
GGTTTTCTTTGTAGCAAAAAGCTACGCAATGGGCTATCTGCGCTCTGTCCACCGCAAGAAATCGAACCAGG  
ATTTTAGCGCTGTAAGTCAGTAAAGTTACTGTTTCATCCATTGGAGGCTATTGAGTGGTGTGTCTGTATC  
ATTCATTATTTTGTGCAATTACCTTTTACTAGTATTTGGTATTTTCGATTTGTTCAACACATTATGCAA  
TAATGCAGAGGTTGAGGAATAGTCGTCTCTAATTTGAAACTGCCAACCAGAGGAATATCAAAATAGTGAAT  
AGAACTCACCGCTCACACAGCTACTCTTACCTTTAACCAAATAGCGTAATTGAATTTTACTTATAACGGG  
CCCATATATCACGGGCTCGAACCTCGGACGTTGCGATACGCAGCCCGGCCCTAACTTTTACTAAACGACA  
AAAGGCACGCGTAAGATAGTTATCAATTTAATTCACGTGGAGGTAAACGATAGTAACACTTTTAGAAGT  
AAGTATATTTTGAATGATGCATAATGTATTGAAATCCGAATTCATTCTCTCGTATGTCATCTATGAAGC  
GATGACGATTGAAATAAATAAATTATCATGTGGTTCATTAATTGTTACTATTATTTTAAACATTCAACTA  
GGTAAACCAGCCGCTTAGGGGTGCAGAGAGAACATGTATTTCTGTGACAAATAATTGCCATAGACTGTTG  
TAGGGATCGATGTATTGATGAAAAGAGGCCCTTCCAGTAGTAGTGAGAATGTATATACAGATAATGCTGG  
CTTCCTCCTTACGTTCTTAAGTGAAGGGTATCACTAGCTTGCTCGTCACACAATAAGCTAGTCTGTGGCG  
GTAAATAGAGAGGACACCCAGTTTTTAAAGGCTAAGTGGTAATAAGGTAATTTTAAACCACCTTAACG  
TTGTCTAAACGTTATTTGTTGTGCTGAAATGAATGAAAAGGTAGCGAACTATAGAAATAACGCCCTCACA  
GGCTAAAAAATGTGAATCATTTCTTTTATATGATGTTATATGTATACATGTAAATTTCAACATCTGTTGA  
ACTGTTTTGTTTTTCCGGTATTTTATCGTTAACATTAAATGTTGCTTTTAAATAATCGTTCAAAAAATAATC  
AGAGAAGTTATGTACTTAATTCACGAAAATCAGCATATCGCTGATAGATGGCAAGTTTTGTTTTAATATT  
ATAGGGAATTTCTTGTTTGTGTTAAGCACAAAATGGGCTATCTGTACTCTGCCACCGCGGGTATCGAA  
ACCTGATTTTTCAAATTTATAAGTCCTCAGAATTACCCCTGAGTCAGCGGTGCGCTATCGGAAAAATCTAG  
TGTATATATTTAGTTGGTTAATTATAATAACTTATTTTTTTTTATCTTGTTAATCATTTTTTACCAGACCAC  
AATTAATTCAATAAATGGAAGTTACTGAACTATTTCTCATGAAAACGGTGTTCCTGCTTCGTACAAAA  
GTTTGTGAGCGGCTCAAGCTTGGAATTCTCTAACGTAACCTTTGACCTTTTATTGCTTAAATATAATGT  
CAGCAAAACCTGTGCTGCTTTCAATATAATTTTTGATACACTTGGAATTATTTCCAGAACTTGTTCGCC  
AGTAGATGCACAAAACGTTTCATGTTTTTTTTTATGACATCTAAGCTTTGGTCATAAATGTAACAATATTT  
TAATTTCTGCTGAGTTTGTAGCTAAGTTATTAACCGGAACTATTGTCAGAAAACTGACTGATAAATA  
TAGGGAACCTTATAACTTATTAGATAACCGTAAACATACCACATTGATAACCTATTAGATAATTTATTAAGA  
CCCGGTACCGCGAAAACTCGGCCCTGATATGGCCGCGCCTTTTTTTTAAACAACCTGAGTACTTTTACGC  
TTTCTGTGGTAGTTAATATGCATCGTAGGTACAGTGCATGTGGGTAATGGATCACAAAGACGACAAACAT  
AGCAAAATATGGCATGTTTCTTCTTTCTGTTTTTTTTTGTGTTTCGTACATACTCTGCCAGTTACTACTGT  
TTCCATGCTTCCTGGTATTCGATTGAAAATCTGAAAGTTATGTTGAATTGAGCTCAACTAATGTAACCTAC  
ACTGTTTTATTAATAATCAATATTGCGATTTATGCGATGTTTTGATTATATGTTTCATAATTTTGTGTTTCT  
GACAGATGTTTTAGTAAAAATCCTACTTTTCGTGGGACGCGATTTTAAATATTTGGGTAATGATAACCT  
ATTAGATAAATATAAACATACGACATTGATAATCTGTTAGATTACTATAAATATAGGGCATTGATATCCT  
ATTACATAACTATAAATATACGGTATTAATAACTTATTGCACAATTACAAAATAGGGTATTTATTACGTA  
ATACATAACTCATAACGGCATGATAACCTATTGCATAACTATAAACATCGACAGTGATAACCTATTATATA  
ACTATAAACATACAGAACTGATAACTTATTATATAACTATAAACATACAGAACTGATAACCTATTATATA  
ACTATTAGCATATTGTACTGATAACCTATTATATAACGATAAACATACAGTGCTGATAACCTATTATATA

ACTATAAACATGCAGTACTAATAACCTATTACATAACTATAAACATACAGTACTGATAACCTATTATATA  
ACTGTAAACATACAGTACTAATAATGTATTACATAACTACAAACATGCAGTACTAATAACCTATTACATA  
ACTATAAACATATAGCACTAATAACCTATTACATAACTATAAACATACAGTACTAATAACCTATTATACA  
ACTATAAACATGCAGTACTAATAACCTATTACATAACTATAAATATACAGTACTAATAACCTATTACATA  
ACTATAAACATGCAGTACTAATAACCTATTACATAACTATAAACATACAGTACTAATAACCTATTACATA  
ACTATAAACATACAGCATTGATAACCTATTATATAATTACTAGATGTACTTCACCAAGGTCCCCGAAAGT  
GTTCTGTCTCAAAAGTAAATAAAAACAAAATTAAGAGCAACAAATATTTTTATTTCTTGCTTTTGAAAGTT  
CATATGTCATGTTGTGTGTAGCCACAGAGTGCATAATTCTTCTCGTGATTTCATGGAATGCGCACGTTT  
TACTGACGTCACGAGAATACAAACTGCAACGTAAAGCGTCTATTATGCGTGTCATTTTAGTGTATACTGA  
CTGACTGACTGACAGATAACACTCTACTGTATACTTATGCGAGTGGTTAAAACAGGTGACTCCTCCAGGC  
AACTTTTTGTCCCCTTTTCTGGGGGAAATAATAATTGAATTCGTTTGTAACAAATTTGTTGATATAATCAGCG  
AATTCATAACGATTCAATTAATTAGAATTTTCATGAACAACCTGAGTAGTATGGTTGACACGTTGTAAGTTG  
AATAAATAAAATGATATATGGTTTATAACTATAGGAATAATGATTAGAGAAAAGGGCAAGCAAAACAAAG  
AAAAAGGCAATTGTGAGAAGTAACGTGCAATTTATTCGTCTTTAACCTATTTTAACTAAAAATATTTCTCT  
CTTTTGGCTTCCTCATCAGCAAACTGCACTAAACATAAAAAAGAATGGAACGATGAAGGCGAGGGTATTG  
TAAAAGACTTAATTCAGCGTTCACATGATTAACAGATTTTGAATCATTATGAACCGAAGTGCGTTTTTTG  
CAAATCTTGATATCGTTGTAGATTTTCCGAAGACTAACTCTATATAGCTTGTCTATATTCAACAACT  
ACTCATCTATGACGAGAATATTACGGTATATTTTACATTGTTCTTTTGGCATACTTCTAGTTAAACAAAT  
AAGCTACGTTATATTATTATTAGGTTGATTTTAGGATCCGATCTATGTGATTACTTACTTTGATCAGAAC  
TTATTTTTCTACTCTTTTCTGTTTTCTAGTTTTAATGTGTAATAAGAAAACCTAAAGGTTCTACTTCCGCAAC  
TTTTTTGAGATAGGCAAGACCAGTTCTGAAAATCGTACTTTTTGTAATCTACTATGCAACTTAACTATGA  
TATTGTAGCATCGAACAAAAAGACGATTTCGTTTAAATAGAACTGAGTTAGTAACCTATTAAGTTTAACT  
TGTGATCACTAATACAATGAACAATGAATTGTCAGAGTTAATTTGAATAAAAGCTGTTAGGACTCAGTAA  
TATTTTAAACCGTATACAATACATTTTAAAGAACAGTGAATGAACCCACGCATATTTCTTATCCTATACAAT  
ACACAGCAGTTAGTTATCAGTGGAACCTAAATTACAGCCTCGTAGAAAGATTCAATATTGCTAGTTTGTCC  
TCCGAGCCAAGAGAAGGAACAATTGATATCAATTTCTCGCGAGCGTGAAACACGTGCGGCTCCCTATAA  
TGTTTCACATGGACGAAAAGAAGACTCTGGTCCATCTCACGTGATTTGTACCCTAACTTATGCATGGAAAATG  
ATAAAAGTGGCCTAACAAATCCCACCAATTCCAAATGCTTGGGCAAGGAGTATTTTGGGGTCTTCTTGTG  
CTCGTGCTGAAGAATATAACATGTGGTAATCGTCTGTATATTTCGCAACAATTATCCAAGACATTTAGAC  
AAAGATATACATGAATAGAAGAGACGATGAAACTCAGGATTATCGGTTATCGTCATTTAGGATAGGTGAG  
AAGAGATGGTTACTAGTTTCGTTTCTTAACAGAGAATTAACACAAAAATGGAATTTACTTTCTTAAAAAAC  
TTTATGGCTAAGCTCGTAAGTTTATTTCAATACAAATACCTACGTATGAGTAATTTTACTTTCTTGACAA  
AATGATGGAACATGATTTGAACTGTAAATGGATTTTTACGCCAAGAGTGACCGAAAAGACCACACATC  
TCTTTGGTTTAGTCTCTCGTGAGTAGAAATTCCTTTACTGTTCCATAAAAGAACTATTTCTTTCTTCTT  
GGTTACATAAGATATTAATCGGCATTCTGTATTTTATTCATTGAAAACCACTCAACCTCTACCTTTACTT  
TCCTTTGATCGCAATCTCTGTTGCCATTGAAAAGAAGTGAACACCACTTATCAAACAATAACATAACTTT  
AACAACCACGTGCATATGTTTAGACTTAATCCTTCTTGAATAAACTTTACAAGTGACACACAGTGAAGTC  
TAGACTATAGAAAAGTGTCGGCTAGCTTCAAACATGGCCTCCCGTGGCGCTGAGAGGCATGGTTTGCTTAA  
TCAAGGACTTCTGATTCTTCAACCCAGATTCCAGAGTGGACATGAAAGAAAATGTGGGATCCGGTAAATG  
TTTGTGGTTAGTTCTTCTTCGCATATTTTATTGTATAGAAGAAAACCTGTATGCGTGGCTGATCTTGCTTA  
TTCAATTTAGGAAACAACAAATAATAATGTTCTTTCAGAAATAAGATTCCCTCCACAGTTGTTTTGTAAA  
GTCAGTGAAGCAGGTATGTTTACTTCAAATATGCAGATTTGTATGCGCCATTGAATGGCATGAAAAAGT  
GGTTTAAACGGCGCCTGTAGATACGGGTTCTGGAATAACTTAATCGTTTTGTAAAGAATTTAAAAATGCA  
ACTGTAGTGAAAAACGTGAAAGAGGCAACTGAAAGCAATGCTTGAATAAAAGAGGGGGGAAAGGAGGAG  
TAAGCTTGATAGCTCTACTAAAGGGGAGGTGGACAATAAACTTTAGAGATATTATACATCATAAGCTATC  
TGACGACACCGACATTACCTTGATAGAGGTTTTCGAATTGAAAGCCCTGCCGCTAGAGGTCTGTGTTTG  
GCCGCTTCGCCTAGTAATTTCCCTTGATATCAGTAGATATCAGTGTGTTTTTACAGCCCTTTTGAGTAAA  
GAAGGAGACAAAATATGTAACCTGTATACTGGAGAAGCAGTTCGTCAATTATAACCAACACAATAGTTGT  
GAAGTGTAAGTATTCTATAAACATTAGCGCAGAATAAACTAATCGTTTTTAATGCAGCCGAGTTCTAGC



TTGTATAGATCTATCTAAAGAGAGTTTGGAGTTGGAACATTACATCTATCCGACAGTATCTTATCCACTT  
GCAGGTGTTAGAACTTCATACATCTATTCTATAAAGTATCTTCAAAAAGTACTTGTGGAATTATTACGT  
CTATACGACGGTGTCTTATCCAACCTTTACGTGTTTGAAGTATTCCATCTACCATTTAAAGTATCTTACCC  
AACTTATTCAAATACAGGTGTTGGAAGTGTACATCTATTTTATAGTGTCTTATCCACTTGTAGGTGTTG  
GAAATATTTTTTTTTCTATCTGATAAGGTTCCATACTAGAATGTTGAAACTATTATATCTATCTGATAAA  
GTGTTTTTACTCAAATGTAGGTGTTGGGACTATTAGCTCATTGCGATAGCGTCTTATTCACATGTAGTTGT  
TGAGCTTACTACGTTTATTCGATAAAATCTTATAATAAAATGTAGGTGTTTGAAGTATTATATCTATATG  
ATTGTGTATTAGACATTTTTAGCTGTTAGAACTATTACATCCGTCCGATATTGTTTCTAACCCAACTGTA  
TCTGTTGGAACATTTGTATCTATTGATAAAGTGTCTTAGCTACTTGTAGGTGTTGGAACATTACGTCT  
ATCTTAAAAATTACCCACTTTTTTACATTTATTGATAGAATTTCTTATTCAAATATAAATGTTGAAGTAT  
TACACCCATTTGATAGTGTCTTATCAATTTGTAGGTTTTGGAACATAACATTTAACAGATAATGTGTCA  
ATCACTTGTAGATGTTGAAACAAGTACATCTACCCAATGGTGGCTTACTCAATTGTATATTTTGAATTA  
TTGCGTTCAAACGAAAAAGTGAATTTCTTTTTTTATAGGTATTTGAGCCATTTCAATTTATCCAATAAT  
GTTTTTACTCAAATGTAGGTGTTGGAACATTACGTTTATCCAATAAAGTGTCTTATTAATGTAGGTGTT  
CGAACTACAACATCTATCTGATAGTGTCTCCTCTCACTCAGTTGTAGGTGTTGAAATCAAGCTGTACTGT  
CAGTTTCGGTTTTGTGTTTTAGTGAATGCTCCTGAAGAAGCTGTAAAGCAAACGTTGAGTGTCTAATTAA  
ATAAAAAAATTTGATGTTATAAGGTAGTTTATTTCTAGTATTAATATATCAGATAAAGTTTCTTAACCA  
CATGTAGGTATCAGAATTATTACATTTATTGACAAAGTGTCTTACTCAAACCTGATGTTGAACTAGTA  
CATCTATCCGATAAAGTGTCTTACCCACTTGTACATGTTGGAGCAATTACATCTACCTGATAATTTCTTA  
ACCACTTATAGGTGTTGAAACTAGAAAAATTTCTCCGATAAATAATCTTTGTGAAATGTACGTGTTGGAAC  
TATTATATCTATCCAATAATGCCTCACACACATACTCCATAGAAGTATTACATGCATCCGATACTTTTCAT  
ACCGACATTGTAGGTATTGGAACATTACATCTTATATGATAAAGTGTGCTATAAAATGTAGGTGTTTAA  
ACTCTTATATCTATCCTATAGTATCTTACCCACTTGTAAATGCTAAAACCTATTACATTTATCCTGTAAAG  
TGTCATATACAAATGTAGGTGTTGGAACACTATGTGTGTCCCATAGTATCTTACACACTTGTAGGTGTT  
GAACTATTTTATATTTCTGACAAAATGCCTTATTGAAACGTAAAGGTGAAACTACTACATCTTTCCAA  
CAAAGCTCCCACTAGTAGGTATTGGAACATTCAAGTTATTGATAATGTGTTTACACTGAAACGCAAGCG  
CTGAATTAATTAATCTATTGGCTAGTGCCTTATCTACCTACATGTGTGAGAATATTACATCTATCTGA  
TAAAAATTTCTGACTCAAATGTAAATGTTGGAACATTATATCAATCCAAAAAAGAGTTTGTAGCCACTTT  
TGGTAGCTGAGATTATTAAATCTATCCGAGAAATTGTTTTACCCACTTGAAGGTGTTGAAACTCTTTGAT  
TTATTGATATAAATTTCTTACTCAAATAGAGTTTTTGAACATTACATCTATCAAATAGTGTTTTACCC  
ACTCGTAGGTATTGTGTTATTATAATATCTATCCGATAGTGTCTTACCCACTTGTAAATTTTTCGAACTAT  
TACGTTTTTCCGATTAAAGGTTTTTACTTTTTTACTCAAATGTAGCTGTTGGAACCTATCTTATAAAATCTCT  
TACTTTTAGGTGTTGGAAGTATTATATCTATCATATAGTGTTTTACACCTTTCAGGTGTTTGAACATT  
ACATCATTTCAAATAAAGTATCAAACATAAATGTAGATGCTGGAACATTACGTCTATCTGATAGTGTCTT  
ACCAATTTGTAGGTGTTTGAACATTCTATCTATCCAATAAAGTGTGTAACCCACGTGTAGGTGATAGAA  
CTATTATATCTATGCAATAAAATATCTTACATAAATGTAGATATTGGAACATTACATTAATAATATATT  
TCGTACACTCTCGCACATACATTACTGTAAAATTTAAAGGTGTTTTGAAAACCATTTATATTTGAAAAG  
CAAAGAAATAACACTTTACTAACAATAAGGTTCTTCTGTATAAAACCTTGAGAGCTGAAGTACGGTGTA  
TAATTGTTGTTCTTTTTGTTAATCGTGCATGATACTGCTGTTACGATTTACAATGACAAACATGATTAGA  
TATGCATTGTTATTTTTTAAACCAAGTTACTTAACTCGTATGTTAATAATTTAAGGGTGCTTGCTTTATAT  
AAAAATTGTGATTGTAATTGTAATTGGTTGTAGTTAAGCACAAAGCTACACAAAGGACTATCTGTGCTCT  
ACCCACCACGGGTATCGAAACCCGGCTTCTAGCACTGTCCACAGACATAGATACTGTTGTGCCACTGGAG  
GAAAAATTAATGAAAACATATCACGATGACAGGATGGATTCTGAGTAGAAATAAAACCATGAAAGCTAA  
CATGACAAAAACAGGGATTTAATGTAGAAATATCAGCTTTATCGAAGTGTGTATCAATTAGTTTCATGTG  
ATAAATAATTAGATTTTTCTATTTTGTGTTACATTACCACTAATCATTAAGGAGCCTTAGTTTAAAAAGA  
TATTTATTCCTATTTAACTGTGTCTCTCTGCTTTTTTCACTCCTCGTATTGTGTTTTTTTTTCTATTTAA  
TTTCTATCTCTATTTCTTTTTCTTTTTACCAGTCTACTACATTATGAGTTTGTTTAAGTTGGTGTGAAATA  
ATGTGTCGATCATTAAGTACTTTAGGGAGCCATCTAGCTGCGATTCACTAGCTGGCAACTCAAATATTCT  
ATGTTCCCATAAAAGAAAGAACTTAATCTGTGTCATCACATCATCCATTGCTTTCTGTGTGACACCAG

CTTCTGGCAACGCCAAGATTGCTGGATAAAGAGTTTTAGACACATT CAGTAAATGATTTAATCTGGATGT  
ATAAAACCTTAGCAGAATAATCTAACCGTTTTAGAGGTAGGTATCTGATCACGTAAATCTGTTATATCACC  
AATTTTACACTGTTTTACTGAAAACATCAGCTTGTACAGAGTAATCATCTTTCATTGTATTTACTGTGAA  
ACTGACATAGCTGTAGATGATTTATAATGACATGTGACTTTACCTTTCATATATATCTATATTTTCGTTTG  
TCAGACTGTCTTCAAAGTCTAGTTTATTTGCCGTAGAGTTTGTTTGTTTGTTTGAATTCGCTCAAA  
GCTACACGAGGGCTATCTGCGCTAGCCGTCCCTAATTTAGCAGTGTAACTAGAGAAAGGCAGCTAGTC  
TTGCGCGAAATTCAAAAAAGTAGACAACTATGTAGGTAGATTACTTTGATCAGCAATTAATATTAGAT  
AATTAATAACATTCACTTGAAAATTGTTATTCTCCACTACAGGTTTCGTCGATTAAATCGAGTTTTACGA  
AATCTTTCGGCTAAAAAGGAACAACAAGCGCAAGATACTGTTTACGATAAATTGCGCCTGCTCAATGGAC  
AAGCTTGGCCTCGCCCAAACCATGGTACCCTGGTAGTGCAACGTTTGGTGGGATAACACCCGCTTGAT  
TCCTCCTCCAATCACTGCATCAGGACACCACAGTGACAATGGCCAAGTCCAGAAAAAGGTAAAAATGTT  
ATAATTTTCTTATATAAATATTATTTTTTATGTTTATCTGAACAAAAAATACCAATACATTATCCATACA  
CGAATAATTTTGAAGCAAATTACATCTGGGCGGTTTTGTTTACATATCGTGTACGTTATTTTAAATACG  
ATGAAAAGTACTGGAAAGTTAATAAGATAAATGTTTAGCCCTACTTGAAACACCACCGGCTCAACTGTAC  
GTAACGTCCTTAGTTGGCTTTTTCTACTAGTGTTCTGGATCTTCATTATCTTTATGAAGAACTATAC  
GAAAGTATGTTGGAAAAATCTAATGCCTGATCTTCTGAATTTCAAAAATATGTTGGAAAAATCTAAT  
GCCAATCTTCTGAATTTGAAAAATATGTTGAAAAATCTAATGCCTGATCTTCTGAATTTCAAAAAT  
ATGTTGGAAAAATCGAATGCCTGATCTTCTGAATTTCAAAAATATGTTGGAAAAATCTAATGCCCAA  
TCTTCTGAATTTCAAAAATATGTTGGAAAAATCTAATGCCTGATCATTCCGAATTTGAAAAATATTTT  
GGAAAAATCTAATGCCCTTATCATTCCCGATTTCTTTAATAATATTTTCTCCTTATTAAGCGTTGTTTA  
TTTGTAGATATCTGAATAAAAGAGCAATTGTTTTAAATTTTTATCGTCAGTCATATTGCAGCTTCTATC  
AAAACCGTATCTTCCACAGTATGCGCTTGATTTACGAATTATTAGTTAAATGTCTTCTGAAAGCTAGTA  
TTATATCACGGGTGTTGAAAAATGAGGGCTTCTATGAAAAATAAAACAAGAATTTTGATGTACTTATGACT  
GAGTTAAATCTGATAAACTAACTCTTGCTATAGAATAACCAGTATTAGTATCTTAACTTAGTAACTCAT  
TAAAACTTCCAGCAAAACAAGCTTGGTTCCTAAGTTACGTTTACTTGTGTAGTATCTTGTACAGAGTCC  
GCTTCTGAAGTATAACATGCCATCCAATTAGAAATGGTTGCGTGTAATTCATCCTAATTTGAAAGCTCAT  
GCAGTCGACTGTGTTTCTACGTGTTACGTGTCTTTGATCTTATTCATATGCACCTTGATGTGTTGTTTCG  
GAATACAATGAGCGTACGTGGCTTGACTTAATACTATTGTTTACATAGCTCCAAAGTTAGCTCATCTCGT  
TACTAGTTCATTATTATTATTTTTTTTATTCCACCTGAAGAGTCTTTAACTGGTTATACATCACGATAACA  
AAAGCTTTGAAAAGTGTGCGTGATGTAAACAGTGTTAGACGCTCTGTAATAAAGCTGAAGATAGCTTTT  
AACGGGTAAAGTTAGGAACACATTGGAATAAACTTACTGAACTTTACGTAATTATAAGGTGTTTATGTTG  
AATTAATCCCGAAAAAGAAATCGTTTTTTTTTATCTCCTTCGCATGCTGGAAATCTTCCTGTGTCGAGTT  
TGGGTACGGGTGTCGATGGCTAAGATAATCTAGAAAATCACTTGGCTAACGTAGTTATACTTAATCAACA  
AAAGGACATTACAATGAATTCACAAACAAAGAAAAATTACAAAATATTAAAAACTGTAAATTATCAAT  
CATAGAAACATCTTCAACAATTATACAACTTGGTACATCGAGACAAAATCTACAATAAAAGTTTAAAA  
TCCCAAAAATCTAAAAATACGCTAAACTCAACAAAGGGTACAGTGATAGTTTAAAAACAAAAAACTAAAA  
ACACTGGTAGATTAAAGTCCGTTACAACCAAATAGTCTTTACTAACATTTTATAACTTAAAGACTGGTAG  
ATTAAGTTTCTCTTAAATCATTAAACTGTTATATTAAGTTGGCAAACCTGAAAAATAAGTAATAACCG  
ATAAAGATAAAACATACTAGGTAAATAAAGCTCGAAAACTAATGTAAAAACAATTTTTAAACAATCCAA  
AAAATGATTGGTAGATTAAAGCTAAGATATTGATAAACAAGGGTTGAAAGACCTTTAAAAATGAGAACTA  
ATAATTTATAAGACATAAAATCTGAAGTACTGATGAAGCTCGTCCATCAGTTTTGCGACGGCTTTGTTGG  
TAAATAAACACCAAATGGATCTATCCTTGATTAAAGTCGTCAAACCTGGCTAAGCTGATTTTCGCACCACTT  
GAGGTTGCACTTCAGAGTGTCTTTATAGCATTTTTTTGGGCGTCTTGAGTTGCGCTTGCCAGCTTTAAC  
TCTCCATAGAAGAGCTGCCTCAGGATTCTGGTTTCATCCATCCGGGTGACATGGCCAGTCCATTGAAATT  
GGGCTTTTCAGCAGCAGTGACTCAATACTAGTTCTACCTGACATATCGAGGACTTCTGACTGGTGGTTCT  
GTCTTGCCAGCGAACGTCCATGATAAAGTGTAGCTTTTTTCAGTGCCTACAGTAGAGAGTCCATGTTTCA  
CAACCATAGAACAGTGAGGTGTAGACTACTGCTTTGTATACCTTTAGTTTAGTAGACAACGGGTGTTCTT  
TTTTTCTCCGAAGCTCTGATGCACAGTCTTCCCATGGCTGGCTGGCTTTCTGGATTCTTGATATGATCT  
CTTTATCGAGTGTTAGATCTGTGAAAAATAACTCCTCAGGTGCATGAAGTTCTCCACGTTTTTTAGCCG

[illegible]

CGGGATAATACAGCAAGTGGAGCTGAAAGAGTGATAAGAACTGATTATGGTTCAGGTGGCACATGAAGCG  
TTATTTGTTGTCTTTGGATTGATTCAAGTGAAAAGCAGATAACTAGGGAACCGATATTGTCAATTAATAGA  
ACAGTGAATTGTATGGTGTGTTACATTCTTAAACTACTATTTTTGGTGACGTATATATTGTACGATATCG  
TATTCCTTGTGTGTTCTTATCAATAGATATTTCTCTTCGGAAGCCGTTTATTCATCTTGGTTGGCCAT  
CTGATTTTCATTGTGAAGTTCCTCAGTTGATCTTTTTATGTATAATTTTTTTCTTGATATAACGATAACAG  
CTTTCCTTTGAAAACGAAGCTTTTTGTAATTTGACTTTCTATATCAATTTATTTCTTAAATCCCACAAAT  
CTGCTTAAAGCGAAAAATAAATCCGTATTTCTAATTTTACTTATTCTTTCCCTATCTTATAAGTGCAGGC  
CGCACATTTTCAAAAAAAGGTAGAACTTACAAATATCAGTGTTTAAATAAACTGAGAAAGCCACAACA  
GGCTCTCGTATTCTTAACTTAAACATCAGAATTGTGGTCAGCAGCATGAGCTGAAACGATATATATGAAT  
TTCTAGAAAAACTTAAACCCGCTTCAGATATAGTATGGAACCGCTACTAATCTAGCTTTTGCTGACAGAT  
TTTCTGTAGGGAATTCAACCAACTTTCAAAAAATATTGAATAGATATACTCAAACATTGATATACCATTT  
TAGTTTGTTATTTTAATAGTCATAAAATGGCGATCATTGAAATAAAAACTGAAATATTGGTGTTTTCTTG  
CAACAGTATGGTTTACAAGTCTACTAATGTTACAATGTGGTTTTTACATTTTACACGTATACTAATGCT  
ACGACGTGGTTTATGAGAGTAATAATGCTACAATGTGATTTACACGTGTGCTCATGCTACAGTGTGATTT  
ACACGTCTACTAATGTTACAATGTGGTTTTTACACGTGTACTAATGCTACAATGTGTTTTATGAGTGTAC  
TAATGCTACAATGTGATTTACACGTGTGTTATGCTACAGTGTGGTTTACACGTCTACTAATGTTACAAT  
GTGGTTTTTACACGTGTACTAATGCTACAATGTGGTTTTATGAGTGTACTAATGCTACAATGTGATTTACA  
CGTGTGCTCATGCTACAGTGTGGTTTACACGTCTACTAATGTTACAATGTGGTTGGCGCGTGTGCTGAGG  
CTACAATGTGATTTATACGTGTATTCACGCTACAGTGTGGTTTTATGTGTGTACTTATGCTACGCGTGATT  
TATGTGCAGTGATGCTGTAAGGTGGTTTTAAACGTGTACTCCTGTTTGAGTATGGTTTACACGGGTCCTTA  
TTCTACAGTGTTTTTACGTTGTCAACACGTGTACTCGTGTTACAGTATTATTTACGTATGCAATGATTCT  
ACAATGTGGTTTTACACGTGAACTGCCGCTACAGGATAAACTTCATGGAAATATCGAATGTCAGTTAAAA  
CATGCAATACCAATTATAACATAAAAGGCGAGTGTGTTATGGAAGCAACTAACATCGGAAACTGAAATCA  
ATTGAAATTATTTCAACGAACAAAATAAACATGAACATCTTCCGAACCTACGCAGACTCAACGACAAAT  
CTAATACCTATTGCGTGCGAACTGCGGTGTCTGTCCGAGCGTTCGTCTGTCTCCCGTTTACGGCGGGCTC  
TTCCCGCGCTGCATTTGAAAAGCTGCGCACGCAAGCAAGCTCAACATTCACTTTTGAAATGAGGGGAGA  
ACAGCCATGAATAATGTTAATGCCAAATATTATTTGCAAGCAGGATATTCTACATTTAAATGTTAGGAA  
TTAATCACACTATCATTAACATTTCAAAATGTGACGTAACCTAAGGAATAAAAAATGTAGATTTACCACA  
TGTTATTGTTGAGTGGCTCTTAGCATGACTGAAACGCTCAACAATTACTTTTCATGGCGGGCAGTATAAA  
TAGCTCAGAGCTTTGACTCTGAGTAAAACCAAGAGTGCAACACAATTAACCTTTTTTAAAGTCCATGAAAT  
AAATTAAATTGACAGATTAACTTACACTTTTTCCCTCACTGGGGACGGGTACTTTTACTTGTGCAATA  
TATTACAAAAAGAAAAACACACAGAGAATCTATTAGTAGTTTCTGAAGACTTGAAACGAGGATGATTTAA  
TATGAAAAATGATATAGAACTGTAATGCATGTGAGTGTGAGAGTACTGAGCTTATATAGGGGTGGATTAA  
TATAATTCATCACCAGATTATTCCCGTTGCAACAATGTTGTTGTTCTAATCCCAATGACATCTAAAAAT  
TAGTATACAAGACTTAGGCTAGCCCTAACTCTTTGTACTACCCACCATTGAAAAATACGTAGTCTATAGA  
TAATGGTATACTACACTGTCTTGTGAAGGGACACCTAGAAATCAACACTATTTATTTGATTTTATGCCCT  
CTTTTATTGTATGGTAAAAACATTGAGAATATTCAAGCTTCTCTTCATTCACCAATAGGAGATCAAAAAAT  
CTGATTCGGATTATTCTAGATCTTCTCTGTGTTTTTAGGTAACATTTATTTATTTGCAATTCGGATTCAA  
ATCATCACATTTTAATTTTCATCACTCGTAGTGACCCAAAAGAATAAAAACTAAACAAAACAATCAAAGTG  
TTTGATTGNNNNNNNNNNNNNNNNNNNNNNNNNNNNNNNNNNNNNNNNNNNNNNNNNNNNNNNNNNNNNN  
NNNNNNNNNNNNNNNNNNNNNNNNNNNNNNNNNNNNNNNNNNNNNNNNNNNNNNNNNNNNNNNNNNNN  
NNNNNNNNNNNNNNNNNNNNNNNNNNNNNNNNNNNNNNNNNNNNNNNNNNNNNNNNNNNNNNNNNNNN  
NNNNNNNNNNNNNNNNNNNNNNNNNNNNNNNNNNNNNNNNNNNNNNNNNNNNNNNNNNNNNNNNNNNN  
NNNNNNNNNNNNNNNNNNNNNNNNNNNNNNNNNNNNNNNNNNNNNNNNNNNNNNNNNNNNNNNNNNNN  
NNNNNNNNNNNNNNNNNNNNNNNNNNNNNNNNNNNNNNNNNNNNNNNNNNNNNNNNNNNNNNNNNNNN  
NNAGTGACCCAAAAGATAAAAACTAAACAAAAAATCAAAGTGTTGATTGAAGTCGTGTTGTGATGTAC  
TTATTATAAAATGCCAGTTGATCGTTTTCTGAAAATATTGATAAGTTGCCATATGGGAATATGTACTAATT  
TCTCAATCTCTGTACTACTACTTCTATTGAATTTTTTGTAAGACGAATTAAAAATTTTCATTTCTTTGAC  
TTAGTTTTTTTCCATACAGCTGATTCTTAGAGCAGTAAGTACATGGTTAACAAAAACAATTTATGGTGA  
TATGTGGACAAACATTTTAAGGCTGGATGAAGTTTGCTAGAATATTTGATTAAAAACGACACACGCACAT

AGTTACAACAAGACTTAATTTAAGTCTATATGGCTGCCGAAATACTTAATTTGAAGTCTGTGTAGATTCT  
GAAGTACTTAATTTGAAGTCTGTATTGGTGTCTGGAATACTTAATTAGAAGTCTGTGCTGCTGCTGACATA  
CTTTATTTGAAGCTCGTGTGGCTGTCTGAAATATTTTCAATTTATAGTCTGTGTTTTGTGCTGAAATACTTAAT  
TAGAAGTCTGTGTGGCTGTCTGAAATACGTAATTTGAAATCTTTATGGCTGTCTGAAATACTTAAATTTGCT  
GAGATACTTAGCTTGAAGTCTGCGTGGCTTCTTAAATACTTAATTAGAAGTCTGTGTGGCTGCTAAACT  
TGATTTGAAGTCTGTGTGTCTACTGAGATACTTAATTTGAAATCTGTGTGGCTTCTGAAATGTTTGTCTT  
AAAGTCAGATATGGTTACTGAAAATCATAAATTGAGGTGTGTGTGTGTCTGTGAGTTCATAAAGGTGACG  
ATAGGTCTAGTTAATATATCCACAGCGTTCTCTAACTGTTTGTGTTTTCCAAATTGTAAGTGCCTGTTGG  
TAACTTAATTTTAATTTGTTTCTTACATTTTAGTCAAGATTAATTACTTCATTAATAATGCCTCCCCAAC  
TGTACTGTGTAATTGCGTTTAATCTGATTTCCATAATCGATTTATAATTGCCAAAGCGGAAAGTAGGTTT  
TCCTAAGGCCATGCTTATTTTCTATGTTTTAATGATGGTGCTTGCCTGCTCTTTCTTATTTCTTAGTTATT  
TCTGTCAAATCACCGCTCCTTTGAAGAAAGTACTCTGATTCATACGACCTTACAACCTCTGTTTTTTATA  
TGGGGGGGGGCGAGCTAGAATCAGTCGAAAACCATTTGAAAGTGTTTCTGATGACCCAGCAGATGGAAGAT  
TTGAAAGATACAAAGAACCAGATTTTGAATGGAATCTATTTTTTATGTATCAAAAATAATCAACAAAGC  
AAAGTCGATCATAATATTTTATATGGTGTTCAATTTGATGGACCCACTACTACCTATCCTATGTCTAC  
GTTAATTTTTCTCCACCAACAGAATGTAAGAGGCGGGGCACAAGATGACGTAGATAGCCACTCCCTCCGC  
TGTGTAAAAATAAAAGCAGACTCATGCGGAAATGCTTGGACGTACGTGACATTAGATGTTCTCACGCACC  
TGAAAAAAAAAAAAACAACCATAAATCTCATGGATTATTAGCCACCTATATATTACAGTACTCAAGA  
ATACTTACTGGTAAATTTGATCAGTAATGATTGAACTTGTTTGTAAATAATTGGCTAGAGCATAAGATCTT  
ATGATAGCAGTTACGGTAAGGTTGTGAAGATTGGTTATCCAATTTTGTATCGTTAATAGTCTATACGAT  
CTCCTAAACATAATTTCTCAAGTAGTTACTTTTTATTACTGCTATTATTATATATACTAACTACCAGTTTCCA  
TATATCTTGCAATTTGCGCTACTAATCTGATGTGTCTTTAAGGGAGTCTTGAAAAAGAACTGTCTCTTTA  
GGACTCCTTTGAATAGAGAAGTAGATTATCAACCGAAACGTTGGATATAAACTAACTGGTATTTGGTATC  
TAATAATAGTAATTATAATAAAAAAGTAACTAAGTGATTAGGCGTATGCGATTATATAGGCTAGTTATAA  
CCATGACAATTATTCTTTAGTGGTGCCATCTAGTAGCTGTGATTTAAATTTCTTAAATTAATATAAGAC  
TTCAGGTGACTTAACGTACTCTTAAATATTTTTTAAACTTTTTGCTAGATGTAAATACACAACATACA  
CTCCTATATTCGTATTATAATTTAATCTACTCTATCAATATTTTGCTTTACATAAATTTCTTAAAGATAA  
AGGTATTTCCATCTTATTTGTTTCTATTAAGTTGCTACTGTTAGTTCTCTAATACTAATTCAGCACAAA  
ACATTCAAGAAACATTTTATTAAATACCCCTGTAGCGATAACAAATAACTAGTTAAGTTGCGTATGTTTA  
ACTTTATATTAAACCATTTCTATTAATCATAAGTGTGCTTTCTCTCACTTTTTTGCCTTTTGTGTTGAAAC  
ATAAATTCAAATTAGGACCAGGATGAAATTTATTCTTTTTTTTTTTTTCATTGACGTATTGCTATTTAATGT  
TTATGATCTAGATGTTCTTTTTTTTTGCTTTTTTATGCATAGGACACTTTGGTACACATTGAATTGATTG  
ATACCTCTAATGATGGGAAACCGGACATGACAAATTTAATGATTTATGCGATATAACACTGTCTCTTT  
TATGTTTTTACCATATGTTTCTTATTTATTTTTCATTATAACACTTTGTTCTTACAAACGGATCGTGTAC  
CTGAGCTAATACAAATGTGAATCATTAATAGTGACGCTAAAGGTCTCGATTATTCTAACAATATGTTAGA  
ATGTGTCGGTAATTTCTTTATCATTTCAAGAAGTTTGAGATTTGATAATATGATGCGTCAGCGTCTGAAC  
TAAATTCGCGTAGATGTGTCTAGTGCATAAAAAAAGCGTAATTTCCACTAGAAATTGTTGTTGGTTGTG  
GAATTTTGCCTAAAGCAATTCGAGGTTATCTGCGTTAGCCATCCCTAATTTTGGAGTGATAGACTAGAGG  
GAAAGCAACTAGTTAAAAATCACCTATCGCCTAATCGTAGGATACTCTAATCGAATAATTGGATTTAACCG  
TCACTCTTACAACGTACCCACGGCTCCATAGTGCGGAGCGGTAACGAGACGCGAACCACGAAACCTCGAA  
TTCACAGTTTCGGCATGATAACCAATGAGTGCCTTGGTCCTTCAGAATTGTTTTTACTATGCCATTTTGT  
CCATTTCTGCTTCATTTTACTCACTTAGTATATTGCAGTAACATACAGAACTAGTGATTTATTTTACAAA  
AGCACTGACTATTGAGGTAGGTAATAAAAAAACGTAAATAATTTAGGAAGAAGAGTTTGTGTTGAATTC  
GCGCAAAGCTACACGAGAGCTATCTGCGCTAGCCGTCCCTAATTCAGCAGTGAAAGACTAGCGGGAAGGG  
AGCTAGTCAGCACCACCCACGCCAACTCTTGGGTTACTCTTTTACCAACGAATAGTGGGGTTGACCGTC  
ACTTTGTAACGCCCTCCACGGCTAAAAGGGCGAGCGTCTTTGGTGGAACGGGGATTTTTTTTTAGGTTTTAT  
GTATATACATTTTAAAAAACCAAAATATCATAAATTACTATCATCCATATCATAGATTTTCACTATAACT  
TATGAAGCGTAGTAACCTAAGCTGTATTTGGGTCTAAAAAATATGAAATTTCAAGCTCACTAAAGACTTAC  
CTTATCGTTTGAAATCTTGTGTGAAAAGAACGAAATTAACAGAATAACACGTCAAAATGGTTGAGAAAAC

CATTGGAGGTTGGTTATTCAAGTCGAGCTCCTTAACCACTTGGCCATGCCAGGCCTAGAAAAAGAAAAAGA  
GAACGCGCTTTTACAATGTGATGAATAATTCTGTCTACTCGAGTCCTAGTTTTGCGAGACATTGTGTGCTG  
TATTTTCCCATTTTCTATGTCTTTACCTTTATTTCATTACAGAACGAAAAATATTAACAATTGAAGGATT  
GGGTGTTTTCTATTGGCTTTAAATAGAAATCCAAATCATAGTCAAGGCCACTTGAAAGATCAATGTGCTG  
AAAATAAAGTTGTGACTAAGACTATATACATTTTCGTTATGAAAGAAAGCCTTCGGAAGTCCGAAAGTC  
ACCAGCATTTCCAAAAATAAAAAAGTGTGGAAAAATGAAGAAAAAAGGCTTCACTGTGCCTATCGGAAA  
AACTGTAATCCTCGATAACCAAAATAAGGAAAAAGAAACAAACTTTTTTTTTTTATTATTTAACTAGGTT  
TAAAAGGGCATTAAAGAATGTTTCTATTTTGTATGCGCTATAATCAAAGTGACAATTGATGTTTTACTT  
TGCATCCTTTAACGCACAGGTATGGCTTATAATTTCTTTGTTTTAATTATATTGGTCTGTAGGTTTGCAA  
ATATTACAAGCTGCTAAGTTGGAAAATAAAACAATAACGTTTTATTAAAATACAATATTTAAATGTCCAT  
TTTTCTGAAACTCGAACTTATAGTTAAACAGTAAACCAACTGATCTTTGTTTGTGTTTGTGAAATTAAG  
CACAAATCTACACAATGGGCTATCTGTGCTCTGCCCACCACGGGTATCGAAACCCGGATTCTAGCGTTGT  
AAGTCCGCAGATATACCGCTGTGCTACTGAGGAGCCCCAACTGTTCTTACTGTATTTGGTTTTAATTATG  
TTTTTAAAGTACATTTTGACAGTTTTTAGGATATTTTTATGTGATGTGACCGTTTGAATTTGCATTTAAA  
ACTGAAAGAGTCTTTAAAGTGCTAAAATGGTGTACGATTTTGGTGTATACATCTATGTAACAGTGTAA  
AAGCGACGAAATTTTTCACAGTTTGAATTGTGTACAAACTGTGAAACAATATGAGTTTGGTGTATCCGG  
AGATTTCCGTTTCTAGGACAACGTAAGTAATTACACAACTGATGAAAATGGGAACGTGTAAGTATTACT  
TTTCAGAAAGTGCGAGATTTTAGAAAATCGACTTGTATTAGTATTTCCAATGCTTAATTAGTCAGTAGAA  
AAATCAGATAAAACAATTACTTAAACGATGTCTGTGCAGTCTGATTTAAATGTTCCCCGGTAAAGTTTGTGT  
ATTTATAACGCTACAGCCTAGGTTTGGATTCCACACGGTTGACAGAGTGCAGATAGACAATTATGTAGCT  
TTGCGCTAAAAACAAAGAACACGTTCTAATTTTTACGTGTCTACCTGCTTATCTAATTTATTAAAAATAGT  
TATCGGAACGCTATATATATAGAAGGTGCTAAGCGCGGCATAGTGGGTAGTTACTTCGTTTGTTTATTTT  
TAGACCAAAACCACAGTGGGCTATCTGTTGTGTCCATCGCAGGGAAACGAATCCCGGATTTTAGAGTTGT  
AAGTCCGTAATCTCACAGCTGATCCACCGGGGACGCTAGTAGTTAGAGTGCTCAGACTGTAAATCTGAG  
AGTTCAGAGTTCGCGACATGTTGCTGTAAAATCACGCTCTGCACTTTCAGGCTGTTGTTGCTGTATCTAG  
AGACACGGTAGTGCTCCATCCAATTTAGAAAGGATGAAATAATGATGTTGTGGTTCTATGTTTCAGGCCA  
AAACGTTTGGCCAAACCTGGGGCATTGCCACAGCTATTCTAAATGCTGGAATGCCCTAGTATTATTTTTC  
AGAACAGATCCAAACACTCTTACATTATATTAAAAAACAGCAGCTTCATACCAGTTTTATATTAAGAGAGA  
GAGAAAAAAAACAGTTAAACAAATGGATACATTATTGTTATTTTTTCATGAATAAGACACAAAAACAAAAAGT  
AAACATAGGACGCTTGTTTTTTTTTTTTGTTGCTGAGCACAAAGCCACACAATGCCTACTTTTTTTTTTCGC  
TGCCACAGAGTTATCGAAACCTATTTTAAGGTTATAAGTTCTCAGACTTACTGCTGAGCTATCGAGG  
AGGAAGAGGGAGGCGAAACAAAGAAGGAACCTCAAGAAATGATACTAAAGTAGGGTTTGAAACTGTAGT  
ACACATATTATTTATTTTTTATGAATACGTTTTTGATCGTTTTGTTTGTGAATTGTTTTCAATGGTCACT  
ATATAGGTTAAACTGACGACTTAAAGGCCTAGAGGCAGATAGACTATCAGATACAGGAGAAATTTAAAGG  
CCTAGAGGCAGATAGACTATCAAATACAAGAGAACTTAAAGGCCTAGAGGCAGATAAACCATCAGATATA  
AGAGAGTAGCATAGTGGTTAAGGAATTATATTTTTTACTAATTTTAGAATAATAACCATATTTAACTGT  
ATTATATATGTTAGAGATTAAGAGAAATAAGATTTAATGAAGTGGTAAAAATATTACTGTTTTTATAGTT  
TTTTTCTTGCTCTTTTTCCGGTTTGAAATTGAGAATCTTTAAATGGACTAAGGCTATATGTTCAGGTCTA  
CATAAATATAAATAATTGTTTTAGAAAATAGTTTTACTAGATAACAAACATATGTAAGTAAAAATCTGAC  
CATTTTGTATGAAAAACATTTAACAATTTCTTTAAAAATAGAATAAAAGTATTACAATTTGCTTAATAGGA  
CTCATAAATCACTAAAACTACTGCTTTCCATGCACATACTCTCTACAATATACAAGTCCAGTTAATGTA  
TTGGAAGAAAGGCTGGAGTAACTGATTGCTGTTACTCTATACCAAAAACAGACTTTTAACGAGTCTGGGG  
TGTTCTTTCTAATGTTGTAATTCTACAGTTATTACGTTTCTGGACATGTAAGAAGAATGAACCATCAACA  
ATTGATACAGTTATTGTTCTTCGTTTAGTTCTTCTGTTTTTGAACAAAACATAATGTAATGAAACGG  
GGATATCACAATCACGCAAAACAAATAAACACGTAGATATTTATTTCAACTAGGAAATGCAGCTTGTTGGA  
GATCTGTAGCATGTTTAGTAATTAATAATAAATTTTACACATCTCTCAGTTCAAAATTAGGGATCGCTA  
TGCGCGAAAAATCTGAAATAAAACAACTGTACAGAAGATACTTTATCATATTCATTAGCGTTCTTTTGTG  
AATTATGTTTGTGTTTGTGTTTTTGAATTTGCGCGAAAGCTACACGAGGGCTATCTGCGCTAGCCGTCCT  
TAACTTAGCAGTGTAAAGCTAGAGGGAAGGCAGCTAGTCATCACCACCCACCGCCAACCTCTGGGCTACT

[illegible]

CTAAATGCTTGGTATTTCCATCCATGTCCCCACACGCGCAGCAGTAAATGTAAAGGCATATAACGCTAAC  
AGTTGGGTTTCGATACTCGTGATAAGCAAATCACAGATAGCACACTGTGTAGCCTTGTACTGCAACAAA  
CAAACTTTCCCTTCATAGTGACACAATGCAGGCTAATATTTATTTAAAGTTAGTAGTTTTATTTTAAGT  
AAGATAGGGTATAATTATTTCTAGATGGTTGAAACACTGTCTTGACTTAGGTGTAGAAAGCGGTTGATTT  
CAGAATGATAACAAGATCATTAATAATTTGTTAATTTAAAAAGGGGAATATGGATCGTCAAAAACGTATAG  
ACACAAGTTGAATCAAAATGCAAAGGTTATATTTCCAGCCTAGTTTGTCTTACTTTTTTAGAGTCCCTAGT  
TGTAGGTTTGAAAATATATTATTTGCATTTTCATTCAACTTGTTTTTGCACTTTATTGACGATCCCTATC  
CCCCATTTCTAAATTTCTTGGTCTTAAATTTTTTATGTCCATTTATGGAGAATAAATTTGTGAGTTACAT  
ACGTGTATATGCATTCAGTTAAATGTTATATGTTGTTCAACAGTTTACTGCTGCATTGGCTTTTTTCCAC  
CCAACCATTATTTACTGGGCCAGGTGGTTTTGTGCTTGAGGTTTCGTGTGAACACGGGTTTAAACAAATGT  
CGAGTACAAAGGAAGCCGCTGACAACAACATCGCATATATTATGTACTTATAACCATGTAAATCAACTTT  
CAGTGAAAAATAATCAACTTTTTTAAATAAGTCATGGACATTGGAAGCGCTTCATATAGTATATCTGTCTA  
GGTTTTGGTGCAAAATACTAATCCAATTTTGCTGTACGCTTTTGAAACAAAAATATGAATAACAATATTA  
ATAATCTACTATGGTAGAAAACTCACTGAAATAGTCGCAGAAAATCACGTATAGACAAAGTACAACAGCG  
AACTCGAGAAATGATGAATACTCAAAGAAGCAGTTTTCAATTAATGCGTTATAAAGTGACAAAATATTT  
TACAATTAATGTGCATTAGTAAAAACCCGATTTTGTCAATGGTGGAAAGTGAAGAAGTTAGAGAAATTT  
TTCAGGGAGAAAAACGAAGGTGTTTTAATTAATTTTAAAATACTATATTCATTACTATTGTCCATGTTTC  
AGTAAAAATATTCGTAGCCGTTTTTTTTTGCATCGACTCGTAAACTATATTCATAATAATAAATATACA  
TATTGTTTTACTCTAATAAAAAACGAACCATTTCTGATGAATATAAAATGGAACATATCCGACTAGTATAACG  
GTGCTTAAATGGCTTCGAAGAGCTTATATTGGTAGCGAAGAAAGACTTTGGAGAATCAATTTAAAAACAG  
CCCTACAACATTCGCAGGAGTTTGTTTAGAAAGCTGTGCATAGATTTTGGCGCAGTATACCTAGCCGTTTT  
TGCTGTAGGATTTGGTGTTTGAATGGCTCGAAAAAAACTAATAAAATATTTTATTCTCTTCGAGAAAC  
AACATAAAAGTAGTCTATGGCCTGCACAGGAGTTATTTTTAGTAGGTTTGGCCAGGTTTGAATAAAATA  
TTCATAGATGTATATTTCTGTAGGCAATAATAATAATAACATGAAGAACATATGGATGAATTTTGAA  
CTTTGTCTAACAAATCGGAAAAATCAACTTTTTACTATTATCAATATATTAGCAGCCTTAGCCATTGAGATA  
GAAGGTCTTGAGTGTGTTTCAAGAACAAGTCTGTTTTTAAGATGGTTTTTGTCCGTATGTTTTATTAGA  
ATTTTTGTGAAATTCCTGGGCGAACCCTATTATAAACCCTATCGTGGTTCATGACTAAGATATCACAAAT  
CGACGTTTCATCTTACGATTTTCATCGGATCTTGTAGTCTACATTAAAATACACAAGCTCCAAAGCCACTG  
AAAACACCAATCTTACGGTGTTCACGATATTGTATTTCTTTTCTTTTTTAAATAGGAGTGGAATAATTAA  
TTTTTGAAGAATTTTCTTTATTGTGCGAAAGTAGTGTGTAATTTAGTAATAAAGATTGCATTCTCTACAA  
TTTCTAGTAAGGCGACAGTGGAAATGATAGCTCTAGTCGGAGCGACCTGGCGGAAGTGGTGATGAGGATA  
ATGAGGCACGACTGCGATTGAAAAGAAAATTACAGAGAAATCGAACTTCATTTACTCCCAGCAATCGA  
AGCTTTAGAAAAAGGTAAACAATTAACGAATGGGTTTCATGAGTTCAAATATTTTTTTTGGTTAGATT  
ATTAAATGTTAAGCCTAATGCAGATGTTTGAAATATCTCTCCCAAGAGCCTTAGACCTGTTTAGATGTTA  
TAATATAATGGGAACACATTCACCTGGGCTACCTAATACTTCATTATTTAAGATATCTGTTTTGCCAGT  
GACACAGAATACAAAAGTGGAGTATTTACAATAATTATTAACCTTTTATTAAATATATATGAAGTAAAAACAG  
CTTGAAATGAGTAAACCATTTTTATTAAAAACACAACGTTTCAACCACACATGTAGCCATCTTCAGGTT  
GGGCGGGTTCTTTTTGATTATTCGGTAAAAATTAATAGCATAAAGTCCAATACACTGAATTATAACAAAAA  
GTTTTATTCTTTCTACTACAACGTATTCGATTAACTTAACTGACGCTTATTGATAGGCTTAGCTATACAG  
TAGACGCTTACACAACAGTATCACTTACTTGTACTTTTTCTTGTGTCTTTAATGCTTCTTAAGAACAAA  
CTCAATTTTCATGAAATAGAACTAATGGAAATAACTGCCAAAACTAACTATACAAAATATTAATTATAC  
CAGACGCTAGAATACAGGTACTGAATTATTCAATATTTATAGAATCAGAGATGGTATATGATGTCTTTTT  
TGAAAAATTACTGTACATTGCTATATGTGTCATAAAGTATTTTTTAATACTACATTCCTTACCCAGAATAT  
TGTTTTATTGTAAAAGTGTACATGCCATTGTACGTGTGTAACCGGTATCCAATTCAAAACACAAGAATAGG  
TAATATGGTTAGAATACAAGTAGTCACAAATACGTTTATGAATATTTTGCTGTAGAGTTTGAAGAAGT  
CATTATCCAGACGTATTTGCCCGTGAACGGTTGGCAGCCAAGATAGACTTACCAGAAGCTAGAATACAGG  
TAATGAATTATTCAATATTCATATAATTAGAAATGATATATGATGTCTTTTTCTTTTTCAAAAAATAGCTG  
TATATAATTAAAGACTATATAAGGTATCTCTCTACAAATACAAATTTTTTAAATAATCCCCATTTCTCTC  
AAGCGATTACATGCAACACAGAACAAATAAAGATAAATCATAGAAGGGTTTACTATGAGAACTCCTAGA



AATTTATCAAACCTAAGGGCTTCTGAGGTTTATACAATATCTTAAGAAAGCTATCGGTTAATACACTTACC  
TTTATTTCATTCCATATAAAATTCATATGTCATTAAGTTCAATTTAAACTAAGCCGTTAATAGCTATTTGTC  
ATCAACTAAACCTAAAATAACAACATTTAATAACGTCAATACAAGGTTTACCTTATAGTTCCACGTATTA  
ACAAACGTATAAACTAAAATCTATAGTTACAATTTGTACTTTTGCATTTATGGCAAGGCTACTAAGACT  
ATTTGCCGCCGTCCTTAATTTGATACTAACCAGAGGGAAGGTGGGCAGTTAGCATCAATCACCATCCATG  
CTAAGGAATTGACTATAACGCACCTACAGCTTAAAATGCGAAAATATTTTGTGGTATCGCAAGGATTCGA  
AATTTTTCGCCCAACTCATGCCATCTATAATCAGAGACACTTCTACACAACAGGTATTAACCTAACACTT  
GGGAAAGTAAATACCCAACTGTTTCGCTATTACTACAACACGACCATTGGCAATAGGATAGTTAAAAATAA  
TAAAGTGTTTAGATAACATAACCCTGAGGAGTTATCCGGCATTTTATATTTTGAATGTCACCGTAAAGCC  
GATAAAGCAGCAAAAACCTGTTTACATTTGCAAAAAAATATTACGACTTTATCTATACCGCGGATATATAA  
AAAAAACAAACGATTTTGTAGCGTTATAAGCTTTTTCAGACAGTTTGTGACAGACTTTTGAATCCTATAATAT  
ATAACATAGATTATATTGGATTCCCAAACCTATAAAACACTAAATATATAGAATCGTGAGAATGACCACAG  
TAAAATCTATGCAAAAGTAAAACCTTAGAATCTAGGATGGTAATCTTCAAAGAAATTGTAACGAAGCAATA  
CAGAGATAGCTTGAGAAATGCAACCATAACAATAAAGGGATAGCTTGAGAAATGCAACCATAACAATAAAGG  
GATAGCTTGAGAAATGCAACCATAACAATAAAGGGATAGCTTGAGAAATGCAACCATAACAATAAAGGGATA  
GCTTGAGAAATGCAACCATAACAATACAGAGATAGCTTGAGATTTGTAATCAAATAATACAGAGCTAGCCT  
AAGAATTACAAAAACAAATAAAAAACAATACAGAGATAACCTAAAAATTGCAATTAAGCAATGCAAAAG  
ATACAGAGAAAACCTTGCTATGTCAAGATTCTGGTTTATAGTAATTAAGGTTGAATAGACTGGAGATGTTA  
CATAAGTCAATATTTTAGAAAATTAAGTTAGAGAAAGATAGTCAAGATTATTATACCTTCGGAAAAATATT  
AACTGAGATTTTAGTTGTTGTTTTTTTAGGAAAGTTTCATAACTGAATAAAATATTAATGTTTTTTTTT  
GAAAACATTTATTTATAATTGCGAAATCTTCATATTTACCTCGTATAAAAAGTAAATATGCTTAGAAGAC  
ATTGAGATAATATTAGAGGATATTTACAAAATATTCGTGATAATATTAGACAATATCAGAGGATACTTAC  
AAAATATTCGTGACAATATTAGAGGATACTTACAAAATATTCGTGATATTATTAGATAATATTAGAGGAT  
ACTTACAAAATATTCGTGATATTATTAGATAATATTAGATGATACTTACAAAATATTCGTGATAATATTA  
GAAGATACTTACAAAATATTCGTGATAATGACAATTGGTGAAAGATGTAGCACGACTTATGCAACATTGA  
AATCTAGGAATTATATAGATCAAAACATTTTTCCCGTTCTATCAATGGAATGCCAAATAACATCCACA  
G**GCTCTTTCTGTTTCAGGTCTGGTTTTTCGAACCGCAGAGCCAAGTGGAGACGCGAGGAAAAATTACGCAAC**  
**CAACGGAGGGTTGCCGAGCAAGCTGCTGTGGCGGCAGCAGCTGCCAACTCAACTCCTGCTCGACTCTCTC**  
**TGAATTCAGGTTTCCCAAATGCTCTCTACCCGGGGATAGGACAGCCAATGGCTAGTATGACCGATTCTTA**  
**CAG**GTATGGGAAGATTTTATTAGTTTAATGAACCTACAATACATAATAGTACCTTGGAGAAAATAATGG  
TCAGTTATTTTAATTTAGTTATATGAAGCAAACCACTAATGGTTTTTATCTATTTCTTTAATGTTATTTT  
CATTAACAGTATAGGTTAGAATGTTTAATAGGGCTATTTTTTATTAGTTTTAATTTTTTATTATTACATT  
TTTATTATAAAGATTATTTGCATTGTTAGCTTAGTATATGGATTTAAGACTAACCTAAATTTCCCTAATC  
TGGCTGGAATTTATGAGAGATTATTGGGTTTACGGCCGAAAATGTCGTTAAGAGGGAGGGTACTCAATTG  
ACGAGCATTATCATCTTTATAGCTAAGAACTTAAGAATAGCTTGTTTAATTAGCTGTACTTATTATAAAA  
TTAATGTCTAGTTTGATCTTTGTAGGTGCATTACTTTGATCAGAATTTAATATCAATTAAGTGTAGGGA  
ATTCAATGTGTATAATTTATTATCCAGTGAGAAGCTAAATATATTGCTGAAGATCAGAATCTCAAAAGT  
TGAAAATAGCGACAAAATTAAGGAACCTTGATAGAATGACTTATTTAGTATAATAGGTTTTATTTGTAT  
TCGTAAGAAGAAATCGATTTATATCTCGCCTTAGTTTCGACTTGGAATTTAACTTATTATTTTTGTCTTAA  
CACGAGGCAAAATCATACAGTTTCTTTTTCAGCTATTACTAATACTTTTTTATAATAGCTATTGTAACATCT  
ATGGATGATTAATCTAACAATAATAAGTTTTGCTTTCTCTGTAAACATTTCTAAAGAAGTACGTTTTGTT  
TACATTTTCCCTTTCTGTAGTTTAAATATAGCAGTAATACGGCTATAGAAGAGCGTTTCTATTTTCTTTT  
TAG**CTCCATTCCACCGATGTCCACTTACTCTATGTCCAACAATATGGCACCTAGTTCTTTGTCTCCAGCAA**  
**CAAACACCATCTTATTCCTGCATGCTACCATCAGGGAGTGCTAGAACTATGACCCCTCTCTCCCTTGGTA**  
**GCTATGGCAGGCCCTTCTTGTCCAACAGCACAAACCATATGTGATGCAGCCTATAAATGGTCAATTTGCAAC**  
**GGTCAACAATGGCAGCGCTGGGTCAACAG**GTGATGAAAATTATGGTCATTCTCGTGTAGCTATATGTGAC  
AGGAAGATATCGAATTATTTTTTGCTAAATACTACCAATAGAACCAAATACATGGGAAACAAAGAAACAA  
AGTTGTTCAAAATAAGAGCATTTTTAACGTCATTTTTTAAAAAGCTGGATCTTGTAGATTAGTTCTTGACTA  
TCTATCTCCTTGATGAAAACACCGAAGAAAGCTGCCATTGAAAATAGACGAGAAACATTTAGAATAAATG

TGTAACATTGTGTGTTTAAAGATAATGATACATAACTACGTGACACCTTTATCGTGACCTGTTTACAGAAAAT  
TATTATTAAGTGAAGTTAACTAGCTATGAACCGCTCTTTGAAAGAAACCGCGTTTACACTCCATGCACA  
CCACAATTGGGTATATTTTATGTTGATCCGGTTTAGGTATCAAATTATAAGAATATATATTGCAACTTTA  
AAATGCACACACACACACACACACATACACACGCAAAAAAATTAGAAAATAAAATAAAAACTCAAAC  
CCGAGCACTTTTAAAACAAATATACTCCTGAAGAAAGAAGGCCCTTTTCGAAAACACGTCGGGTTTTG  
GGATTTGTTTTTACGTCAGTTTCAATAATAGCTTTAGAAAAGCTTTATTCCATGTTTGTGTTGTCATTA  
TCTGATTTCTGTCTTCTTATTGGCTCGTGAGGATTGTATGTCAAATAACAGGTTTTATCCAGATGTGTT  
AAAACCGTGTAGGATTAGCTAGTAGAGGATCATTACCCGTAGCTTGCTCTGTAGAATACTCACAAAACCTA  
AATCTCTTTTCTCTGAGGATGACAAATAGACACAAGTGAAGATCTTTTTTTTTCATAGGATGAAAAGGT  
CCGATTGGTTTTAGCTCATTCTCCCCACAGGACGATGAGGGCAGATAAACATTAATTCCTTTTTTCCCAAG  
AGAATAAAGAGATCAGATGAGAGTTAACTCCTTTTTCTCAGAGGGTGAGGCTAGACGAGTGTCAAACCTT  
TCTCCTCAGACGAAAATAGATTACACTTAACTCCTTCCCTCTAAAGGACGAAAAGCTTCTAACAGAGAG  
CTGAAGACCGTTCTATTTATAAAGCAGTCCGCAATTTTCACTTAATGATATCCAAGTTTAACTTAAGTTA  
TTCGTGAGTGATGTGAATTAGTTATGCAGAATTCTATATTCTTGAAGTTTGAAGAAGACCACGACATC  
ATTTGGTCTATCTGTGGATACGGAGATGGCTCAGGAGTCTATCCGAGCCAGGAAGCCTCGAATAGGACT  
CCTGAGCAGATACTAATATACGTATTTGCACTCACTAGATTAAACATTAAGACAGGCATGTATATAAACA  
AATCTAGATTTCATATCTTTATCTTAAAATTAGATTACGCTTATTTGGGAGTCGAACAACAAAAACAATCT  
GCTTCTTTAATGTAATGAAGTCTATATACAATAACGTTTAAAAAGTATAATAAGCGTTTTTGTTTTA  
AATATTTTTATCAGTAAGAGGGTTAAGTTGGATTATTAGAAGGTTAGATTGAATATGACACTTTGTCTTT  
ATTTTTTCTAATTTAGTCTAATATCACCAGGGTTATCTGTCCCAGTGCAAGTTCTTTCCAGCCCTGGTG  
AACTGAATATGTCCACAGCTTATTGGCCAAGGATCCAGTGAACCTGGGAGCGTCAGAAGCACGTGTGTAC  
AGGAAAGAGACTAGCTTTTTGACGCTGTTAATTAGCATCTTTAACTACTTCTCGTCCGGTTGAACCATGTG  
AACTGTGGAATTTACGATTGGTTTATCTGATGAAACTGAAATTTTACAGGACTGTGGAGAACGTTAGA  
TAGCATGCTGTTATCGAAAAGACCTCAAAGATTGTGCTCGAATTACCAAAAATATCAGCATATGATAATA  
CCGTACTCGGGAAATTTACCATGAGATTGGAATATTATTGAATGGCTTTTAAGCATTGACATCATCATT  
CTGAAACACCCCTTGACTTTACCTAGTCTTCCGGTTTATCAGTACTTTGGATGTTTGTAAATATACTTCT  
TTGGTTTTCTCAAAAGCTGTGAATTTGAGATGTAAAGTTTCTTATCAAATGCAAGAGTTGAGACATTGG  
AAGCTGCAACAAATATTTCTTGCTTGTTACACAATTCTGTATGTATACTTTCACAAGTGATGTAAATTAT  
TGTACAGCTAACTTTGAAACGACCGTGAATAACCTTAAACGAATCTATGAATATATATATATATATAT  
CTTTTTTTATATTTAAAAATAAATCAAATTTAGTATAGTGCGCTCTTGTTGTTGCAACATGATTTTAAAGAC  
GTCTTTGTAGCATGCTGTAACAGTTTGTAAATTAGTGCAAAAATAATTCCATGAGTTTACAAATGTAACC  
AATAATTTCACTTTACACATTCGTGAGTAGGCCTGGACTTTTCAAGGTTAAACCAACCACTAAGGAATA  
GCGTACGAAACGAGACGTTTACAGCATTATTAGATGTTGACCTACGCTTTTTCGTGTAATTCAAATACCA  
CAAGAATAAGTTTATGATTTGTCAAAATCTGTTAAGACATTGCGATTTTGTGTTGGAAAAAGGTCCAGTG  
TTTTTTCATCATTTACTTTTACGGAAGACTTTCCATTCTATTGCACCAGTAATTATAAAAGATCGAAAAAC  
TAACAATAAATCGATGCACGTGATTATTCTACATTATTTACTAGTAATAAAGATACTATGTCCAGAACGT  
ATACGCCACCTTAAGTCTCACAGTAAATGACTAGTAAGAAGATTTACTCACAACCTCTATTTGTTATTAGT  
GCAATAAGTACTTGTGTTAATGCTATGAGTTGAAACACGTGGAGAATCTATCGACGGCCACTGTGTGAAG  
ACCTTTTTTATGATGTTGAAATAGTTTACACCCATAGCTTTATAAATATAGAAAATTTCTTTGACACTACT  
GATAGAGAAAACATAACTGTTACAGTGGGTTATATATCCTTAACGATCTGTGTCTATATATATATATAT  
ATAATTTAAACCATTTAACAAAATAATTGGAATTTGTTTTCTAATTTATTTCCGTCCGAGTTTAAAGAA  
ATGCAAAACAACTCAATAAAACGTGTTTTTTTGTCAATTTTCTATCTAGAGGTAAAGGTTTATATTGTGAG  
TGAAATTGTTCTTTTCGTTAAAAGAAAAAATAACGAATGTTTTACACGCAGTTGTTAATATCTTTTAAAT  
CTATACATTTTGGTTTCTTAACACCTTTTATTCTTTAACCATTATGATCCTTTCTTGCTGGTACAAATAA  
ATGTTTAAATATATGTATTGAACAAATGCTATTTTTCTTATGTTGAAGTAAATTTGACGATTTTTGATT  
CTATATTCTGTAACCTTAGATAGAGAACTGATGCTTAAAACTGAGAATATTAATAAATAATTTATAGTT  
TGGTAAATGATATGAGAAGCAATAGATAATTACTCCTTATAGGTTTCAAAGGAGCTACAAGTATTCAGAA  
TAATTGTGAGCCCTACTTCATATGGTAATTTTAGCTTAAAAGCATATTGTACATATGAAATGTTTCGTT  
CTCAGTAAAGTACAATTTTAAACAAACAATGGCCTCTTTAGTTAGAATTTAAACATTACAGTAGCCCTTA

CCTCGTCGTAAAACAAACAAACGAACCCATTTTTTTTATTTAACTAACTTTTGATTCTGAACAAAACCAG  
GGTTCAATCACGTGAAAAATAACAGATTTATATTACACGACAGATTATGCCCCTTTATAACGATTAAACAA  
GATGGTAGCTCCATGATGACAAGTGATATATTATTTCTTACAAAAATGGGGAAAAATAATACATCAATATG  
ACGTGTTAGATCTGTAAATTGTAAGATGGGTTAAGGTAGAGTATTATAAAATTATTCTGACCCCTCAGAC  
ATAACTATTTACACGTAACATCTTAAACTAAAAAAGAAAAAGAAAAAAGCCAAAGGTGAGAAGGA  
CCTTGAAGGCTTCCTTTTACATATATAGCAAAGATAATCTAGTTTGGCTATTAATCCATGCATATAATTT  
ACATCACTTTAAATATATCGGAAGAAAATCCACCTTACCATAACACTTGCACGGTGAGTTTACAGAATGG  
ATCATATAAAGGATGATTTTACAGGTTGGAGAATGTATAAGATACGTATTTACAGAGTGGAGAATGTAGA
