# Supplementary material for: Evolutionary Conservation and Diversification of Five Pax6 Homologs in the Horseshoe Crab Species Cluster
Source: MDPI journal article supplement (doi:10.3390/arthropoda2010007), 2024-03-04
Supplement: s1 [file s1]

# Ey1

ATGCCACACAAAG

MPHK

ATTTTGACCCGTCGTCCTCCGGCCCACTTCGCCAGTCGTCTGTCTCAGATCCAG

(D)FDPCRPGPLRQSSVSDP

GACACAGCGGTATCAACCAGTTGGGAGGCATTTACGTCAACGGACGGC

CGCTACCTGACTCCACACGACAGAAGATTGTAGAACTGGCCACAGTGGTGCTAGACCCTGCGACATCTC

CAGGATTCTTCAGGTGTCTAACGGTTGCGTCTCCAAGATCCTCGGCCGATACTACGAGACCGGGTCCATT

CGGCCCCGGGCCATCGGGGGAAGTAAACCCCGTGTGGCAACCCCGCCCGTTGTGAACAAAATCGCCCACT

ACAAACGAGAGTGTCTTCTATCTTTGCTTGGGAGATTCTGGGACAGGCTATTATCTGAAGGGATATGTAA

TAACGACAACGTTCCAAGT

(G)HSGINQLGGIYVNGRPLPDSTRQKIVELAHSGARPCDISRILQVSNGCVSKILGRYYETGSIRPRAIGGSKPRVATP  
PVVNKIAQYKRECPISFAWEIRDRLLESGICNNDNVPS

GTATCTTCAATTAATCGAGTTTTACGAAACCTGGCGGCTCAAAA

AGAACAACAAGTGCATGCACAAGCACAAGATGCTGTCTATGATAAACTACGTATACTCAATGGTCAGGGA

TGGCCTCGCCCAAACCCCTGGTATCCTGGTAGTGCAACATTTGGTGAATAACCCCTGCTTGCGTCCCTC

CTCCAGTGAAGTGTCCAGTCTCCCTACCGAAAATGGACAAATTTCAGAAAAAAG

VSSINRVLRLNLAQKEQQVHAQAQDAVYDKLRILNGQGWPRPNPWYPGSATFGGITPACVPPPVTAPSLPTENGQIQKK

AGGGCGACAGTGGAAACGGAGAGCTCCAGTCGAAGTGACCTGGGGGAAGCAGTGATGAAGACAACGCAGCTCGACTC

CGGTTAAAAAGAAAACCTGCAGAGAAATCGAACATCCTTCACACCAGAGCAGATTGAAGCTTTAGAAAAAG

(E)GDSGTESSSRSDPGGSSDEDNAARLRLKRLQRNRTSFTPEQIEALEK

AATTCGAAAGAACTCATTATCCGGATGTATTTGCTCGTGAACGGTTAGCGGCAAAGATAGATTTACCAGAAGCTAGG

ATACAG

(E)FERTHYPDVFARERLAAKIDLPEARIQ

GCTGTTTCTGTCCAGGTTTGGTTCTCCAATCGTAGAGCGAAGTGGCGACGAGAGGAAAACTACGGAACCAGAGACG

AGCTGCCGAGCAAGCCGCTGTAGCAGCCGTCAACACAACACCGGCTCGTCTACCTCTCAACGCCGGCTTTCCAATG

CCCTGTACCCGAGTATCGGACAGCCAATGGCTAGTATGACAGACACTTACAG

AVSVQVWFSNRRRAKWRREEKLRNQRRAAEQAAVAVNTPARLPLNAGFPNALYPSIQPMSMTDTY

TTCCATTCCCTCCGATGTCCACGTACTCTATGTCCAACAACATGGGTCCTAGTTCTTGTCTTCAACAGCAAGCGCCAT

CTTATTCCTGTATGCTACCCCCAGGGAGCGCTAGAAGCTACGATCCTCTGTCACTGGGAAGTTATAGCAGACCATCA

TGTCCTACCGCACAAACCATATGTCATGCAACCTGTAAATGGCCAGTTTCATACAGTTAACAACGGTAGTGCCGGATC

TACGG

(S)SIPPMSTYSMSNNMGPSCLQQQAPSYSCLPPGSARSYDPLSLGYSRSCPTAQPYVMQPVNGQFHTVNNGSAGST

GTCTGATTTGCCAGGGCTCTCTGTCCCAAGTCCCAGCCCAGACTGGTGAACATAACATGTCTCTGCCTAT

TGGCCAAGAATACAGTGA

(G)LISPGLSVPVQVPAQTGELNMSSAYWPRIQ

# Ey2

ATGCCACACAAAG

MPHK

ATTTTGACCCGTGTCGTCCTGGTCCACTTCGCCAGTCGTCTATCGCTGATCCAG

DFDPCR...DPG

GACACAGTGGTATA

AACCAACTGGGAGGTATTTACGTCAACGGTCGACCACTGCCGGACTCCACCAGACAGAAGATCGTAGAAC  
TTGCTCACAGCGGCGCGAGGCCCTGCGACATCTCCCGTATTCTTCAGGTTTCTAATGGTTGTGTTTCCAA  
GATTC TAGGCCGATATTACGAAACCGGATCCATCCGGCCCCGAGCAATCGGGGGAAGCAAACCCCGTGTG  
GCCACACCGCCCGTGGTGGCCAAAATGCTCATTACAAACGGGAATGTCCCTCCATCTTTGCCTGGGAGA  
TTCGAGATAGACTGTTGTCTGATGGAGTGTGCAGTAACGATAATGTTCTCTAGT

HSGIN...NVPS

GTTTCGTCAATTAATCGAGTTTTACGAAATCTTGCGGCTAAAA

AGGAACAACAAGCACAAAGATACTGTTTACGATAAATTGCGCCTACTTAATGGACAAGGTTGGCCCTCGTCC  
AAACCCATGGTACCCCTGGTAGTGCTACGTTTGGTGGGATAACACCCACTTGTATTCTCTCTCCAATCACA  
GTATCAGGACTCCCCAGTGATAGCGGCCAAGTCCAGAAAAAAG

VSSIN...SGQVQKK

AAGGCGGCAGTGATACATGATAGTTCTAGTCGGAGTGACCCTGGCGGAAGTGGTGACGAAGAAAAACGAGGCGAGACTG  
CGGTTAAAAAGAAAGTTACAGAGAAATCGAACTTCATTCACTCCAGAGCAGATTGAAGCTTTAGAAAAAAG

EGGS...QIEALEK

AGTTTGAAAGAACTCATTATCCAGACGTATTTGCCCCGGAACGGTTGGCAGCCAAAATAGACTTACCAGAGGCTAGA  
ATACAG

EFERTHYPDV...PEARIQ

GCTCTTTCTGTTCAAGTCTGGTTTTTCCAACCGCAGAGCCAAGTGGCGACGCGAAGAAAAATTACGAAACCAGCGGAG  
GGTTGCCGAGCAAGCTGCTGTGGCGGCAGCAGCTGCCAATTCTGCTCCTACTCGACTCTCTCTGAATTCAGGTTTTCT  
CAAATTCTCTCTATCCGGGTATAGGACAACCAATGGCTAGTATGACCGATTCTTACAA

ALSVQVWF...SMTDSY

CTCCATTCCACCGATGTCCACTTACTCTATGTCCAACAATATGGCACCTAGCTCTTGTCTTCAGCAACAAACACCAT  
CTTATTCTCTGCATGCTGCCATCAGGGAGTGCTAGAACTATGACGCTCTCTCCCTTGGCACCTATAGCAGGCCTTCT  
TGTCTTACAGCACAGCCATATGTCATGCAGCCTGTAAATAGTCAATTTGCAACGGTCAACAATGGTAGCGCTGGGTC  
AACAG

SSIPPMSTY...GSAGST

GCCTAATATCACCAGGGTTATCTGTCCCATTTGCAAGTTCCCTCCCAGCCTGGTGAAGTGAATATGTCCACAGCTTAT  
TGGCCAAGGATCCAG

GLISP...YWPRIQ

## Ey3

ATGCTACTCTTCCCCCAGGACACAGCGGTATCAACCAGTTGGGAGGAATCTACGTCAACGGACGGCCCT  
TGCCAGACTCCACACGACAGAAAATTGTAGAACTGGCCACAGTGGTGCTAGACCCTGCGATATTCACG  
AATCCTTCAGGTGTCTAACGGCTGCGTTTCCAAAATCCTAGGCCGATATTACGAGACCGGGTCCATTCGG  
CCCCGGGCCATCGGTGGGAGTAAACCACGAGTGGCAACTCCCGATGTAGTGAGCAATATCGCCCAATACA  
AAAGGGAATGCCCTTCTATTTTTGCCTGGGAGATTGAGATAGGTTGTTGTCTGATGGGATATGCACTAA  
CGACAACGTCCCAAGT

MLLFPPGHSGIN...VPS

GTTTCCTCCATAAAATCGTGTTTTACGAAACCTCGCTGCACAAAAAGAGCAACATGTACAAGCACAGGCACAAGATGC  
TGTCTATGATAAACTGCGCATGCTCAATGGACAAGGATGGCCTCGACCAAACCCTTGGTATCCAGCAAGTGCTACGT  
TTGGGGGTCTAACTCCCGCTTGTGTCCCTCCTCCAGTTACTGTCCAGGTCTGTCCACCGAGAACGGCCCAATTTCAG  
AAAAAAG

VSSIN...GPIQKK

AGGGCGATAGTGGAACAGAAAAGCTCCAGCCGAAGTGACCCTGGTGGAAGCGGTGATGATGAAGAAAATGCAGCAAGA  
TTACGTCTGAAGAGAAAACTACAAAGAAACCGGACCTCTTTCACTCCAGAACAAATAGAAGCGTTAGAAAAAG

EGDSGTE...QIEALEK

AATTCGAACGAACTCATTACCCAGACGTTTTCGCCCGTGAACGATTAGCATCAAAGATAGACTTACCAGAGGCTAGA  
ATACAG

EFERTHY...PEARIQ

GTTTGGTTTTTCCAACCGAAGAGCCAAATGGAGACGAGAAGAAAACTACGGAATCAGAGACGAGCTGCCGAGCAAGC  
GGCCGCCGCTGTCAACAACACACCAGGTGCGCTCCCTCTCAATTCAGTTTTTCCAAATTCCTTGTATCCCGGTATAG  
GACAACCAATGGCTAGCATGGGGGATTCTTACAG

VWFSN...SMTDSY

TTCTATTCCCTCCGATGTCCACTTACTCTATGCCGAACAATATGGCACCAACCTCCTGTCTTCAGCAGCAAGCGTCAT  
CTTATTCTTGCATGTTACCACCAGGGAGCGCCAGAAGTTACGACCATCTCTCACTAACTAGCTATAGTCGACCATCT  
TGTCCCTACCGCACAACCATATGTAATGCAGCCCGTCAATGGTCAGTTTTCTACAGTCAACAATGGTGGTACTGGTTC  
TACAG

SSIPPMSTY...GTGST

GTTTGATATCACCGGGACTATCTGTCCAGTTCAAGTGCCAGGACAACCAGCAGATTTGAATATGACTTCAGCCTAC  
TGGCCGAGAATACAGTGA

GLISP...SAYWPRIQ

# Toy1

ATGCCTCATAAAG

MPHK

GTCACAGTGGAGTAAATCAGCTGGGTGGGGTGTACGTGAACGGACGGCCGTTGCCAGACTCGACCCGTCAGA  
AGATCGTGGAGTTGGCCACAGTGGTGCTAGGCCTTGTGACATCTCCCGTATACTGCAGGTCTCTAACGG  
TTGTGTTTCCAAGATACTGGGACGATACTACGAGACCGGTTCCATCAAACCCCGGACCATTGGTGGCAGT  
AAACCACGTGTAGCTACTTCAACTGTGGTGAATAAAATAGCCGACTACAAACGAGAGTGTCCTTCCGTCT  
TTGCTTGGGAAATTCGAGACCGACTCTTGGCAGACGGGGTGTGTAAACAGTGAGAATGTTCCAAGT

GHSGVN...CNSENVPS

GTATCTTCCATCAATCGAGTTTTTAAGGAATCTGACGAGTCAGAAAGACCAACAGGAA

ACGTCTCCTCACCATGTCCCCATGACTGGACCAGAATCAGTTTATGACAAATTACGGTTGTAAACGGTT  
CCCAGCCCTGGCCCTGGTACCCGACCGGCCCCCTCTCACCACCTTTCACGGCATCCCTCCCACATCATCGCC  
AGTTGCTCTAGGCCAAAATGCGGGTCTTATGGGACCTGGCCACGGGGGAAATAGTCACCTAGGTCTTGCA  
GCGTGCGAAAGCCACCGTCAGGATCATCCTCGTGTTAAAAAAG

VSSIN...PRVKK

ATTCCATAGATGCAACTTCTGACGGAAATTCAGAAAACAATTCGTCTGCAGATGAGGACTCGCAGCTGCGCATGCGT  
TTAAAGAGAAAACCTCAAAGAAATCGGACATCTTTTACAAACGAGCAAATTGAAGCTTTAGAAAAAG

DSIDAT...QIEALEK

AGTTCGAAAGAACACATTATCCAGATGTATTTGCAAGAGAAAGATTAGCTGAGAAGGTCACCTCTCCTGAAGCTCGT  
ATTACG

EFERTHY...PEARIQ

GTATGGTTTTTCCAATCGTCGAGCAAAAATGGCGGCGAGAAGAAAAGCTTCGTAACCAAAGACGTGTAGTCGAACAACC  
AACAGGTACAACGTGCTAGCACCACTAACGGACGACTTCCAATTAATGGAACCTTTTATAACTCTATGTATCCAT  
CACTAGGACAATCGATGGCTGGAATGGGAGATTCTTACAG

VWFSNR...MAGMGDSY

TGTACCACCACCATCCAGTATAGCACCAAATCATTGTGTGCAGCAACGTGATCCCACCTCTTACACCTA  
CATGTTTCACGATCTGGGATCTTACTCACGATCATCTTGTACACCCAGTCAGTCAATTAACGGACACCCG  
TCTTACTCTGTTAATGGAGGAAGTACGCACGGTGCAG

VPPPSSIAP...GGSTHGA

GTGTAATTTCTCCAGGCGTGACCGTTCTCTGCAGGTACCAAGTCAAGGTCCTGATCTCTCAATGGCTACA  
AATTATTGGCATCGTATTACG

GVISPGV...WHRIQ

## Toy2

ATGCCCCATAAAG

MPHK

GTCACAGTGGGGTTAATCAGCTAGGCGGAATGTACGTGAATGGAAGACCTTTACCAGACTCGACTCGTCAGAAAATC  
GTGGAGCTGGCCACAGTGGTGCTAGGCCTTGCGATATCTCCCGTATACTTCAGGTATCGAATGGCTGCGTCTCCAA  
GATACTGGGACGTTATTATGAGACCGGCTCCATCAAGCCTCGGACTATTGGTGGCAGTAAGCCTCGTGTGGCTACTG  
CGGCTGTAGTCAATAGGATAGCCGACTACAAAAGGGAGTGTCTTCCATCTTTGCCTGGGAAATGCGAGACCGACTT  
TTGGTGGAAGGAGTGTGTAACAGTGAAAACATTCCCAGC

GHSGVN...CNSENIPS

GTTTCTTCAATCAATAGAGTTTTAAGGAACCTCTCGTCTCAAAGGATCCTCACC GGACCTCTCCTCAAGTTTCCAT  
GGCTGGGCCAGAGACGGTTTACGACAAACTGAGGATGTTAAACGGTGCCCGAGCCGTGGCCGTGGTACCCGACGGCTA  
CTTCTCATCATTTTACGGCGTACCTCCGCCCTCATCGCCGGTTACGTTAGGTCCCAACACCGGACTTGGGGTATCT  
GTTCCAATCGGAAACGGTCACTCAAGTCTAGGCTCGTGTGAAAGTAATCGCCATGACCACATGCATGTCACAAAGAA  
AG

VSSIN...MHVTKK

GTTCCATAGACGCGACATCTGATGGAAATTCTGAAAACAATTCCTCTGCAGACGAGGATTCACAGTTGCGCATGCGC  
TTGAAACGAAAACCTCAAAGAAATAGGACATCTTTCACAAACGAACAAATCGAAGCTTTAGAAAAGG

GSIDATSDGNSENN...SFTNEQIEALEK

AATTTGAAAGAACACACTATCCAGATGTTTTTGCAAGAGAAAGACTGGCTGAAAAGATATCTCTTCTTGAAGCCCGT  
ATTGAG

EFERTHYPDV...PEARIQ

GTATGGTTTTTCGAACCGTCGCGCCAAATGGCGACGAGAAGAAAAGCTGCGAAACCAGCGACGAGTGATTGAACAACC  
AGCTTGACGTCTATGCTATCGCCACCTAACGGACGACTACCAATAAATGGATCCTTCTATAATTCCATGTATCCTG  
CGTTAGCACAACTATGGGAGGGATGGGAGATTCTTATAG

VWFSNRRA...MGMGDSY

TGTTCTCCAGTGTCTAGCATGGCGTCGAATCATTGTCTACAGCAACGTGATCCTTCGTCTTACACTTACATGTTCC  
ATGATCCGATCACTCTAGGATCGTACTCTCGACCTTCTTGTACACCAAGTCAGCCAATTAATGGACACCCATCTTAT  
TCTGTTAGCACGAGCAGTCCACACGGAGCAG

SVPPVSSMAS...SVSTSSPHGA

GGGTAATTTCTCCAGGCGTAACAGTTTCTTCTCAGGTTCCAAGCCAAGGTCCGGATCTTTCAATGACTACAAATTAC  
TGGCATCGCATACAG

GVISPGV...WHRIQ
