# Supplementary material for: Evolutionary Conservation and Diversification of Five Pax6 Homologs in the Horseshoe Crab Species Cluster
Source: MDPI journal article supplement (doi:10.3390/arthropoda2010007), 2024-03-04
Supplement: s1 [file s1]

>WCHO01004207.1:31814390-31844069 Carcinoscorpius rotundicauda isolate OT-2019 Sc28yqQ\_4222, whole genome shotgun sequence

ATTTGAAGAGACTGATTGGCTGACCAGCAGCTACTAACAGCTCCTGTAGCTTTTGAAAACCTCAGAGAAAA  
ATGCCTCATAAAGGTAAGAATGAAATGACTCTTAGGGGTAGGAAGTCTATATGTCATTTTGTATTACAAA  
AAAAAGAAGCCTTTACGTGTGTTTTAGTTTAAATTAAATGTTAGTTGTGTGAAATATAAGTTAACACAAG  
CTGTATTTTTTACTCTTTAAATTTACGTGAAGTTGTAAATATTTAGTATTATTCAGTAATAGAAATTCAA  
TTTGTGTGTTAATGCAGAAAACAGAATCGTAAAGAAGTTGCAAATACTGAAAAGTATTTTCATTTATCAATC  
TGTTTGTGGGCTATCTTACCATTAAATATATCTTTACAAGAGTTAAATAGTAATGCTTTTCATTAGTTTC  
ATTTTCATTTTAAAACTATGAATGTTATTTTGCATAGGTATGTTTGTGCTGTTTGTGTAAGTTTAGTATCT  
TTTCTGTTTGTCACTGAGCAGATGACAGAGTGTATTAATGCTTTATAATAAACAACTTTAAGAACATTTA  
ATAAACACCAATAACGCTAACATCAGGAGAGAGAGCTGTGATCGTACCAAGAATCATTATTGGACACG  
TTTTTTACTCACACTTTTCTAAAGAGTTTATTTAGTAATTCCTAATTTTCATTTGTTGTTGTTCACTTCA  
GCTCACAGTGGAGTAAATCAGCTGGGTGGAGTGACGTGAACGGACGGCCGTTACCAGACTCGACCCGTC  
AGAAGATTGTGGAGTTGGCCACAGTGGTGCTAGGCCTTGTGACATCTCTCGCATACTGCAGGTCTCTAA  
CGGTTGTGTTTCCAAGATACTGGGACGATACTACGAGACCGGTTCCATCAAACCCCGGACCATTGGTGGC  
AGTAAGCCACGTGTGGCTACTTCAACTGTGGTGAATAAAATAGCCGACTACAAACGAGAGTGTCCCTTCCG  
TCTTTGCCCTGGGAAATTCGAGACCGACTCTTGGCAGACGGGGTGTGTAACAGTGAGAATGTTCCAAGTGT  
AAGTACACCCCTCAAAATAGTGTCAACTGTGAACGTAACGGAAAAGATTAGAAACAACCTCGAATTCGTTCA  
AACTGTTAAGTTTGATATTAAGCATTTGCTAGTCTCTAATTCAGCATAAAAATAACTATTTACACCTA  
TGCAACATTACATTAGATGAAAAATATCTATTTACACCTTTGCAACATTACATTACATGAAAAATAACTA  
TTTACACCTTTGCAACATTACATTGGATGAAAAATAACTATTTACACCTTTGTAACATAACATGAAAAAT  
AACTGTTAAATTTAAATTTAACTAACTGATAATTGAGAAGTGTGACTAAAATAGTTTTAAATATCTGAAG  
TTATATATTATATGAGTGTAAAAACGGAGCATAGTGTGAACCTTTCTTTTGGTCTTATGATAGATTGGTT  
CATCTTCTGAAATATTTTATAAACTATTTTTTTTACGTAGCTTTTAATGACGTTTGTGTCAACAAAATGT  
TCAACAAATGAAGATACCGCATTAAGAACAACGTTAGGGGAAGTAAAGAAAACATTTTCGTAAGTTATACT  
GATGGCAAAGTATTTGACACCAGTATATATCACAGTTGTCTCTGTTGTGATTTTAAATGTGCTTCTAAC  
GACAACCGTAAAGTTGGAACCTCAGTGTGCAACAATGTAATGGCATGGTGTCTCCGTTTCATGCACGTGGCT  
CAACTCCTCTGTAATTGCCCCAGTATGTCTGCAGAGTTACATCGCTAAAAACTAGGTTTCGATACCCAT  
GGTGGGCAGAGCACAGATAGACCATTGTGTAGCTTTGTGCTTTATTCAAACAACAACAACAACAACTGG  
AATTTTGTAAATCCTTCGAGAAAAGTAATTTTTTTTAAACAACGATACACAATTCCTGGTAGATGTGCAAAGGT  
CATATCGATTAGGTTTTTACGTCTATAGCTCGATCATATTTCTCTTGCTGCTTTCAAATGAGTTTGAAAA  
TGCAATTTATCTTTTTTTTCTTCTCGCAAAAGTTACGCAAATGTTTCATTTTAAACCAAGTATTATCTA  
CAAGCACATTACTCGTATTCCAAAGGAATTATAACACAATCACCTTGTAAATATTCAGTTTTGGAGTTT  
GCTATTAGGTAGCTTGAAAACTGTACAACGACTGTTACTCCAAACCCCTTGACTTAGGAATTCGACCG  
ACCAACACCACTTATAAAATTTTTGATTTTATAAGATAGGACAGCCCTTTCTGTTAAAGTTGTCAAGTTA  
AATTGTACTTTACATAATTTTTACAGGTGTTTTTTTTTAAAGTTTTGCCGCTGTATCGATAGCATGTCGT  
GCAACCGAAACGCCATATCCAGGGATTTGCACATGTATGACTGACAACGTGTGAAACCAACAATAAAAAAC  
ACATGCGCTGATAGTAATGGACTAATCACAGTTTCAGTGAAAACATAAATTATAATTGGCAGACCTGTGT  
GGTATAATACACATTCCTTCAATGTAACATTTGCTACTGTATTAGCTGTCAAGGTGCACTCGACACATCTT  
ATTACACTTTTTTGGTGTCTATATAAGTTACGATGGTTAATAGTCGTTTTAGAAATAAGTTATGATGTGCAC  
ACTGATGTGTCTTGCAGCATTCAAATTTTAGTAAATAAACCTAAATCTATACCAACTTTAAAGCAATCAA  
AACATATTATTATACAGGATTGCAACGACTAGATGATGTTTCTAAGACATTGCAAATCAGTGGTAAATGT  
TTACATAAACGATGCAACTCTTCTATTGAAATGCTTTTCTTGTATATCAAGGTATGAATATACTGAAC  
CATCTTATCTGCTCATCGTTATGCAGTTACTTCTAAATTATATGATTATGATGCCTTTTAAATAGTTTAA  
CGGGTTTATTTAAATGAAATCCGTGCCATGCGTTAAACAACGGCATACCTGCATAATAACTTTTGGAAATC  
GATTTGGGAAATAGCTTAATATCACTTTTTATTTAAACAACGAGGGTTAATGTTGGCATAACGCTCGAATACT  
TAGCTCATATTTCAATGATTAAATGGTAGGTTTACTGACATCTTAATGTTATATCAGAGATGTACTACAT  
AGATCACAAATCGCGAACATATTGTTAAGGAAAATAATTACTCGTAAAAAGAAGAAATCCAGGAATATG  
TCGGGGGAGGATTGCTTTAATACAGCTTTATTTCGAGTTCTAAATGTAAGGAAAGTTTTTATATAAAGTAG

TGATCTAGCGGATGTTTTTGATGTTTCATAAACTTACTAATTTAGAATTGAAAATACAAACATTTTCGCTCT  
GTTTATATTTTATCAACATAAGTACCTGGAAAAGCTAGACATAAAATATCACTGTAAATGGGAATGTGGG  
ACGTCATGCCTACTGTTTTAATCTGCACCCCAACACCGTTTGTCCGTCCCAATGTTATCGTGGTACACG  
AGGCATCAAAAGCCGTTTTTCGTTTCACGTCGGTTTTCAGGTGTTTCACTCAGTTGCGCTCTAGTTCGATTC  
AGGTCGGTTTTCATGTGGTTTACTCACTTAAGCTCTAGTTCCTTTACGTCGGTTTTCTTGTGTTTTACTCA  
GTTGAGTTCTTGCTCATTTACGTCAGTTTCAACTGTTCTACTCAGTTAAGGTCTAGTTCGATTACAGTG  
GGTTTCATGTGGTTTACTCACTTAAGCTCTAGTTCGAGGAATCAGCACGGTATAAATTCAGTATAAAAAA  
TCACCTGATTTCTTATTTAATTAAACTGGACGTCTAGGATCTGATTTTCTTTAACAAGTTTTATCGACAT  
TGATTTGTCTATATCCTCATAAACACTTCTAAGAATGGCGGAACACTACATACACACAGTATGTCAATGT  
TACTAAATGTACACCGTTTACGTATTAAGATCAGATCAGATTTTAAAATACCATTGATACTATTATAGGC  
AGTTAAGGTTTTATCAATCTGTAATATTTTATAGGCTGAACACAAAAATTTCTTAATTGAAAACAGCTTACT  
TCAGTATAGGACAATAGGACTGGAATATATTTTCATATGTTCAGTGACGTTTAACGATTTTTTTTTTTTTT  
TGACAGGTAACGTCGAAGTTGTGTATCTTTCCTCATAGCATTATGTCTGTAAAAATTGTGCGAAGAAAT  
ACATTTATTGAATTATGTAAAAACGTTTTATAATCCATCTGTAGGCTTCACTTGGTGTTTAGTATATGTT  
TCAACAATTATTTCTAACTTATTTACGAACTCAAATTGTCTTATTGAATTACAACCTCCATTTAACTAT  
AAAAATGTATTTCTAGGTTTCTTTATCACTTGTTTTGTTATTAAGCTCAAAGCTACATAAGTGACTGTTTT  
TGCTCTGATCAACACGAGTATTGAAAACGGGTGTTAAGCGTTTTAAGTTTATAAATGTACCGCTGTGCCA  
CTGGGGAGAAGGTCCCATATTTAAGGGGGAAAACAACGACAATCACAATAAATACAGCTGGAGTGCAATG  
TTTAAAAAACCTTTTCTTGATGGTTAATGTAAATAATTGTCTGAAATTAATGAAGGACAAAAAATTGG  
TGAACGTGAAACGTCAAGCATATCAGCTTTATCAGTTTCGTCTGTATTGGTAGTAAATACTTTTAAAAATCTT  
TTTAGAACGTTACATCCACATATTTTCTTAAAGCTGTCATAACAGCTGAATTGTAGCTTATTTCCTTTTT  
TGGTCAAACATTTACACAAGCTTAAGACATTAATAGTGTTAAAGTGCTTTTTACCAGAATATTTCTACATA  
TAAATATATTATGTGCATAAAATATGAAATGAAAACCTTTAATTTTTATCTAGTGTATTCTCTTAAAGATA  
GTTGATACAGGTTGAGTTATCGAAAGATGTATTATATTAAAGATGGTTGATATTAGATGAGTAATCATAT  
AATCATATAATAACAATATAGTTGCTTACAACCTAAAGTAAAGTGTTAATTCTTTTCATTTTAATGTATAT  
CATGCTTCTAAGCCTTTTAGTCTCATTTTATAGTTCTATATAGTTAAAGTTCGGTTCTTAAAGAGAAAAGT  
AATCAAAAAATGAAGTCACAATTAGATTATTTTACTTCTCATAATAAGGATAAATCAGAAAAACAAAAACA  
GATAAGTGACTTGATAATTTATCTCTGATTATCGTATTAACCTCGTGTTTGGACACATTCTTAGTTGAGTA  
ATCCCAGTAATTAGCAACGTAAATCTCAGGACTGTACATTACTAATTACTTGAAGTATATCTTTAATGTT  
CGAACATACAACCTACAGTTTAAACGGTTTCTCGTTTATCCATTTCCATGATTATGATCTACCTTAGATGT  
TGTACATCTCTAGCATCTTAAGACACCTCATAAAGTTTAACGATTTCTTGTGCGTTGACTTCACTAATTA  
TTATTTACCGAAAATTGAAAATTGTTTCACGCATGCGTCGATCAGATATTATCGGGAAGGAGAGTATTTG  
GAAGCTATCGTTTTAAAGATTGTTGGTTTTGAAGATTGTGAGGATAGGTACGTTTTTCTGTGGGACTG  
TTAGTGGGTCACTTTTTTTAGTGTATATTTGTCAATCATTTGCACTACAGGTGGTCTATACAATTCACA  
CAGGGTAATCCTGTGAGAAGGTGTGGTGCTAAGGTGAGATGTTTCAAAAATTGCTATGAGCAAAAATCC  
TCTGTGAATTTGACAAGCGTATCCAACCTGGCTTTGAGATTTGACAAGAAAATTGGCAGTTATGTGACCA  
AATCAATGACGTCTTTTTTAAGAGGAGGAAATCTTTCGGCTGGTCTGAGTTATATATGCTCCAACTAGGA  
GTGGACGAGGAAAATAACGACACCCATATACACGTTACTCGAACCATGTGAGGAAAATTTTCACTCGCT  
TTTTTTTTACTTATTTATTGGCCTTGTGTCAATTGCAGGTCACAAGCGCCGTAATCAAACTTTTATAGTCCA  
GAAGTAAAGGAAAATGTTATATATGAGTTAAATAAATAAAAAGATTGGATTTCTTGCAGAAAATATGTTTTG  
AATGACATTCAACACAACACCAAGCCATTTCAAAATTTATATATCGTATGTGTGTATGTATATATATATA  
TATATATATATGTATCTAATCTGTAAATATATATGTTTACAGTGTTGATGTTGTTAGATCACCTGATTTT  
TGTCTCTCGTGTGCTTCTTTTTAAATCGTGTGTTTTAAGATAATTAAGTTTCGTAATGTCAGAAGTTTGT  
AATTAGGGTTATTGAAAAAACAATTTCAATAAATTTAAAGTTTCGAGGGGAAAAATAATTGTTTACAAA  
ACACGTTTATGAATTAAAGAAAAGTTTGGAGTGCCTTATTTTTGTAACCGTCATTACTATTTGTTTTAAT  
CTACATCAGCCTTAGACCTAAACAAAAGCAAATGGTAGAATAATAGAGAACTGAACTTTAAATTAAGCAC  
ATTTTAAACAACTGATTAAAAATTTAAACAACCTACACAAATCATGGTTACAAACTCATTTGCCAAAAACAC  
CAAAATATGTACTTTCAGCATATATATATACACACAGACTAAAATGTAACCTAGTTTCTGTTTTAAAAATG  
TGTTACAGTGAAAGCTTTGGCACTAATATGGATTTATTATTCTAAACTTGTTAATCATAGTGGTATATTT

AATTACTACTATTTTACAGTAGTATAGAAAAATATTTATGCTTGAAAACTTATAAAACGTAGATTTGACA  
AAAATAAGTTTCATAAAAAAGTTTAAAAACAAAAACGAGATTAATTATCTTGTGCGGTTAAATAATAACAA  
CAACAAACGAATGTATGGTTATGCACATAATTAATTAGCTTGGTAAATACGGAAGGAGAAGAAAAAGAAAC  
ACTCAATTTGCAAAGCTAGCGGCCCTGCATGGCCAGGCGTGTTAAGGCGTTAGACTCGTAATCCAAGGGT  
CACAGGTTTGAATCACGGTCGCACCAAACATGCTCGCTCTTTTACGCTGTGGGGGCGTTATAATTTGACGG  
TCAATCCCTCTATTCTGTTGGTAAAAGAGTAGCCCAAGAGATGGCGGTGGGTGGTGATGACTAACTGCCTT  
CCCGCTGATCTTACGTTGCTAAATTAGGGACTGCCAGCGTAGATAGCCGTCGAATAGCTTTGCACGAAAT  
TCAAAACAAAAGCAAAGCTAATTTTAATTAATCAACAAAAATGTATTTGGAACGATTTTAAATGAAAGTAG  
AAGATAAAAGTGACAGAGTAGAAAAAGTAAGCTTCTAATTAATAAAACATAACATTAGTAGCTGTGATATAAAT  
ATATATTATTATTGTTTTCTTCATGAGATTACAGCGATACAAAATTGGGAACCTAAAAAGTATAATCTTAA  
ACCAAATTTTTTATCAAATTTCTCTTTTATTTGCTCGATGCTAGTTTTTTTTTTTTTTCATTTTATCTTCAGAC  
AAATACAAGATATTGAACATAAGAAAAGCAACAAGTGGGTAAACATATGTATAACCCAAACCAGGAATAT  
GTGTTACTTTTTGCCTGTATTGTTTTGCGAACTTAGGCTCTTTTGATAGTGTATGTTTTACGAGCTGGACA  
AAAATTTCAAACAGTCGTGAGTTTTTGTCTATCCGTACAGTAAAGCTTAATGTAACGTGTGAAAAACAATAA  
CAAACCTGTTGGAACAATTATATCCAAATTTCTAGCGACGGAACCTCAAACAGGAGTGAGGCATACATC  
TGAGGTTTTGCTGTTTTTCTTTGATCATTTCAATACCTTGAAACTTTGTGAGTTGGTTGGAATTTCAAGC  
CTGGTTTAAACCTAAAAATTAAAGATACACATACCCCATCGGTTATTTAAACACAATTTTGCAACCAATTA  
CTTGTCATGGTCTATTAACCTGTGTTGGATACAGGGTTACTGTAACAACATGTGAGTAAAAAAAATGTAA  
ACATAATTACTTTACCCCCAGTGGCTTAGCGGTATGTCTGCGGACTTACACGCTAAAAATCCAGGTTTCGA  
TACCCGTGGTGGGCAGAGCACAGATAGCCATTGTGTAGCTTTGTGCTTAATTCAAAACAACAACATAAT  
TACTTTCAATGTTGCTGTTACTTTCTCTATTACTATGCCTTTTACATTTGTTTTCTGAAAATTATTTACAC  
TGGATGTTGTAAACGGTAAATAAATTACTCGGTATATTGTGATATACATGTTAAGAATAGCATAAAACCG  
TATAGGCGACAAAGATATCAAGATTAAATAACAGGTTCAAGAAAAGTCAAGTTTTATACACTTGAAGAAG  
AATAAAGTTTCGAAGTGACATTCTTCAAATCGTACAGCTTGTAAACCCATGAACGTGTGACATCAGGGAAC  
TGGTTCGAAATGTCATCCTTCTTTAAATATATATATATATACATGTTAAACTTCACAACTGTTCACTTTT  
AAAATAAACACATAAAATACAAGTGAGAAATTTAGGGTTAAAATTCCCCATTTTGTATTTCTACTTTTA  
TAAATCTTAAACACCAGTTCTTGAACTTATAACAACCTCATATTCATTATGGTCATATTAATTTATATTT  
TAACAATTATTTTCATATTGGACTCCCATTAATTTTATTAGTAAGTACTTAAAATGTAAAAAATATCG  
TCATCAGGTAACACACAAGTAAAATTATGTCCATAATACGATGTTTCTGAAATATATATGTCGTATTTAA  
TTTTTATGTCTATAGTACGATTCTTCTGAAATATATATTTGGTATTTAAATTTTATGTCTATAATACGAT  
TCTTCTGAAATATATATGTGGTATTTAATTTTCCAAAGTAACTGACGTAAGCTATTTCTCTATATTTTAT  
TACAGCGAACTTAAAAATTTATTCTGTTAGGTCCATCGATAAACGGTATTGATTGTAAGTAATAATAGACG  
AAAGCTACAACGACAGTTAATATGTAATTAAGTTTTGCTTTATGATTTCTATGCATGCGTTTTTCTCTGA  
TTCTTAGCAAATGTTAATTTAAATATTCAATTGAAACGAATAGATTTTATGCGGAGGTTGAGTTTAAAGG  
ATGTTTTCAAACCTAGTATTAAACGAATCTGCGTATGACAACAGTTATATTTTAAATTTATAATTTATCTTTT  
AACTAAATATAATTAGTTATTTTCTATAAAACTGAACTTCTACTTCTTGTCTCATCAATTAAATTAATTT  
AAGAAAACCTGGTTTTACTTAGTAAGAACACTCTAGAAGCATTCTAAGAAAAAGCTATATATATTAACA  
TTTTTGATCAAATATATTTAGGTATCTTCCATCAATCGAGTTTTTAAGGAATCTGACCAGTCAGAAAGACC  
AACAGGAACTTCTCCTCACCACGTCCCCATGACTGGACCAGAATCAGTTTATGACAAATTACGGTTGTT  
AAACGGTTCCCAGCCCTGGCCCTGGTACCCGACCGGCCCTCTCACCCTTTCACGGCATCCCTCCCACA  
TCATCGTCAGTTGCTCTAGGCCAAAATGCGGGTCTTATGGGACCTGGCCACGGTGGAAATAGTCACCTAG  
GTCTTTTACGCTTGCGAAAGCCACCGTCAGGATCATCTAGTGTTAAAAAAGGTAAATATTTTACTTGTA  
TGATTGTGAGAGCTGGAGGTAGTAGTTAAATAAATAAATCAAACCTGTTTTTATATTTTATGACATGAAA  
GGTTTATTTGTCAAGGTTGTATGGTTATCTGAAGGAGCAACAGTGTAGATTATTGATTATTAGGTAAATG  
ACTCAAAATACTCCTTAGTAATCTGAAATACCGTAGAAAACCTCAACAGTGAACGTATTGTGGATTTAAAG  
TTTTGTGTCAGGTATTAGTAGAGAAAGAAGAACGACTCAATGAAAGAGAACAGAGATTTAGATAAAAAATCCT  
CCAATCGTATAGTCTGAGAGCGTGAAGATGAAATTGCTTATAGGGTTCACGTGTATCATATATTAACATG  
ATGTGTGTGTTAAGAGTTTATGTTTGACTAAATCCGTGTTATGAATTAATGTGAGTCAATTATACAATTT  
TTAGTTTATTCTAACAGTTTCGGCCAAATATGTATTTACTTGTGTTGCCATTCGTCCATGATTTTATTTCAA

GTTTTCTAAGCCTAAAAAATACCTAAAACTGAGTTAAATATAATTTAAGTTTAGAATTTAAATGGATGTTG  
ATATGTATTTACTTTTATGACATTTGTCAATGAGATTGATACACACACACTATTCCTTTTTCTAAAAATAAAT  
ATATTTTAAATATACAGAAGCTAAAAAATTTACAAAAATGGTATTACAAATAATAACCCATGTACAAAAGT  
TTTACAAACTTACACCAATTATTGAGTATTGTATCTGGTCTGGGACGTCCTTGATGTCTTAGCGGGGGGT  
TCACGATTAAACGAATTAACCTTTGAGTTGATGTAGATACAATTCATTTAACAAGAAGCTAGCTAGCCCTGT  
GTTCTTTTTCCGAAGTTATGCACTGTCTTCAAAAATACTAATATCCGATGTGAATCCGTTAAAGTGAAATG  
GTTTGCAATGTTAGAAAATGTATAATCGTTCCTAGTCAAATATCAAAAGTTCTCAATTAATAACAATTACA  
GTTTCCTAGCTTTAAAGTATACCAACTATAATGTAATAAACCAACAGAATATACTGTTTTTTTGGCGTATG  
GCGTTGGTTTACACTTATAGGCGTGAGGAAAGTTTCTCCAACTACAGGTGACACAACAATATTTACGTTT  
ACAGACACACATTTGTTGGTTCTTACACTCGAGAATCTTCTACAACCTTTAATGAATAGACGGAAATTTTCGC  
AATACAGATTCAATGGCATAAGTTATGTACATTTCTATAAAAAATTAGCTTAAACAAGCATCGAAATTAA  
AATCTATATCTGAAGGTAAATCCGTCACAGATTCTAAGTTACAAACTGCAAAAGAATGTCTCTTCAAGCC  
GCGAAGAAAACTCAATCTGTAAAATGACTAATAAGAGCAACAGAATGTAATACCTTAAAAATTATGAAAAG  
AACCAAAACGAATCAGGATTTACCGAGCATCTGCAGTAGTTTATAACTTATAGTTTACGTTGGTCATCTA  
AGGATACATAAGATAAAAGTAATACTCCAATACTGGTTTTACAAATCTTTTGTTCATCCTGACAATATGA  
AATTTAATAATTAATTATGTCTTTTCCATAACAAACATGTTTATAAAGGCATCGGCTACATGCTACTTGG  
TTGGTTGTTGCTTGTCTAGGCTATCTCTTTTAAAGATATCTGTCTTAGCTTGTAGAGGTGACATGTCTAT  
CAGGTTAAAAATGTTATATTTTAGGAAATATATTAGTCAAATGCTCATTTTATATTCGGAATATTTTTT  
GAAGGATGATATAAAATGATTGATATTTAAAAAGAAGAAAAAGTTGTTGTAGAGTTTATTTCAGTTTGTTA  
ATTCACATCAGTTGAATTAACAAGCATTAACCTCCAATGTAATACAATAATATACAAGTATGTGATCTAC  
AAAGAAACGTAGAGATTGTTGTACTCGGTGTTTTAAATTTCGTGTAAAACCTCGTTACGGGACCCGTGCATGG  
CCAAGTGTGTTGAGGCGTTCCTACTCGTAATCCGAGGGTTGCGGATTTCAAACCCGATCGCACCAAAGATG  
CTCGCCCTCTCAGTTGTGGGGACGTCATAAAGTGACGGTCAATCCCACTATTTCGTTGGTAAAAGAGTAGC  
CCAAGAGTTGGCGATGGGTGAATGATGACTAGCTGCCTTCTCTCTGGTCTTACACTGCTAAATTAGGGAC  
GGCTAGCACAGATAGCCCTCGAGTAGCTTTGTGCAAAATTAACAAAAACAAACCAACAAAACTCGTTAC  
AATTGAGATATATATGAGCCAGTTGCTTAATTGGCCACGAGCTCTAGTTTTAACTTCATCCAGTTAATAT  
TGTGAACTGTCATCTCAATACGTTATTTTACTCGAGAAAAAACTAACAACCTCAAAACACGTAAAAATA  
CTAACACTCGTGTGAGAAACTCTGGTTTAAATAGCTATATCATATTTTTCACACATTCATGCTAAATAA  
ATAGCTTTTTCTTGCTTTTATTGCTAAAAATTTCCAAATCTCGTTGTTTTATTTCTTTATGGAGGAAAAATA  
TATTTTATGTATTTTGTGCGATTGTGTTTTCGGCGAAGGAATACAATACGAGCTAAAACCACTTCACACAGT  
GACACGATATGCTCTGAACAACCTATTCAATCTGACAGAAAGCATGGTTTTCGTATTTAATAAAAAAGTTTCG  
ACCTCCTATCGAAGTTTAAAGATCTAACATACAACGCTCTTGAGTACGTATCCAGAGTTTATATATGTTT  
AGTACACTACTTTCTGAGAACTCATCTGGAGAGTCTGTATACCACACATATTATTGAGTGCTGGGTAC  
ATACAGTGTTGAAATGTGATCCATTTAAAGTAACGATGGGACAGAATATACGGGCTCTATTTTTGACGTT  
ATTTAGCGTTGAGCAAGTAGCGTGATGACACATGAACTAAATGTATGTAAAAATTTCTTATCAGCACAAA  
ATATTCATACACTCAAAATGATAGAGAAGTGATCAGGCCAGCGTGCCAGGTGGCTAGGGCGGTTCGACTC  
GTAATCTGAGAGTTACGGGTTTGAATCCCCGTACACCAAACATTCCCGCCCTTTTAGTTGTGAGGGAGT  
TATAAAACAACGGTCAATCAAAGTATTAGTTAGTGAAAAAGTAGCCCAAAATTTGGTGATGGGTGGATGA  
TGACTAGTTGCCCTACTCTCTGGTCTTACACAAGCCCCCTTGTGTGGCTCAGCGGTATGTCTGCGGACTT  
ACACGCTAAAAATCCGGGTTTCAATACCCGTGGTGGGCAGAGCACAGATAGCCTATTGTGTAGCTTTGTGC  
TTAATTCAAAACAACAACCTGGTCTTACACAGCTAAATTAGGGACAGATAGCTCTCGCGTAGCTTTGTGCA  
AAATTCAAAACAACAACAATTTTCCAAAAATATAAAAAATCAAACAAAATAATAAGTGTATTATTGT  
CATGAAAGATTCCGGTGAATAATTACACTCGATAAATAAGGGCATGACAATGTTAAACAACGAGTGGGTGGA  
TGTTAAGTTTTATAACTCGTGTAACGGCACAACTGTGTGCGATTAGAGAAAATTGAAATATCATGCAATTG  
ATGGATGGATACTGCAGTTATAAAACAATGGTCAATCCCAGTATTAGTTGGTGAAAGAGTAACCAGGAGT  
TGGCGATGAGTGGTGATGACTAGCTGCTTTCCCTCTAGTCTTACACTGCTAAATTAGAGATGGTTTTCGC  
AGATAGCCCTCGTGATGTTTTGCGTGAAATTCTGAACAAACCAACCAAGAAATTGATCAGATCAGGGAT  
TTCAAATTTATAATATGCAGATATGTTAACGAAAACCAAAAAATATATATAAGAAAGAAACCTATAACGT  
TCGTTTTGCAACCGAGGTAGGCTTGTGAGAACCCGCTAACGCTTACGTACCTCAGGGAAACAGTAGGCAA

AATAATCAAAAGGATCTCTATTTGAAAGCGAGGCCAACAACTATGAGCCAGTTTTACCAAGACAAAACA  
TGCTGTCATATCTCTTGTTGAACCACTACATATCTCGCACACATAGAAAATGAATTAAGAACTCTTCTAT  
TCTTCAAGAAGGCATGCAATTTAAATAGCCGGACGTAGCGCCTATGAATTTATGTGCAATACACATTGA  
AATAGGTGCTTAGAATCCTCTGTTCTCGTAGGTTAGATGAATTATGAATCTATAGCACGTAATGTCGGAC  
GTGACATAAAATAACATATTGAAATAATTTTTGAGAAAGGATGCACGACCGTCAGATATAATATGACCAG  
ACACAGCGATATAGACAGTAATGTTTTAACATAGCGTACTCAACCTTTGTTTATATTATGATAATTCATG  
TTAAAGACCAATAAATTACGGGTGTAAATTAATATTGCGTTCAATAACATAATGAAGGTGAGTTGTACAT  
TGTGTAGCAGCGAAGTTGAGAATTATTTTATCAGGCTTTTCGTGCCGCTTCAATGTGTTACAAACATGG  
TGTTAATTCCTCCGAAACTGTCTGAAAGCGTTTTAGTAGATGACACTGATATAACATATGTGCTGTTTGT  
CTGTCTATCATGTGAATATTTATCATTGAATTACTTTTGGTACAGACGGACTATGACGACATAAAAAATTA  
AGACCTGTGTTCTATATTGACCTTCTATACTTTTAGTCGAAGTAGATAATAGATCTAATGATGCAGTGTA  
CACTATGGAAGATCAAATAAAGCGAGCACACGTTCTGGGTTGTGTTTTTTTTTCTCCCTAGCCTCTCGTAC  
CAACTGATTGCCTAGCAAGCTAGCGTGACATACAGTTTCCCGATCTCCAAGTCAGTTCCAAGTTGGCCA  
TCTACCGTAATATGGGATTAACTTAGGCCTGTGAGAGTTTGTGTTGTTGTTTGGAAATTCGCACAG  
TTACTCGAGGGCTATCTGCACTAGCCGTCCCTAATTTAACAGTGTAAGACTAGAGGGATGGCAGCTAGTC  
ATCACCACCACTGCCAACTCTTGGGCTACTTTTTTACCAACGAAGAGTGGGATTGACCGTTACATTATA  
CGCCCCACGGCTGGGAGGGCGAGCATGTTTAGCGCGACGCGGGCGCAACCTGAGACCCCTCGGATTACG  
AGTCGCACGCCCTACGCGCTTGGCCATGCCAGGCCACCTGTGAGAGAACACTCTTGGTTTTGTCTTAA  
ACGCACATGTTTGAAGCTGGCAAAGTTTCAAGAAACACAATAGTTGAGATCTCTTCTTTTTTGGCTCAGC  
CGGCGAGATGCATGTGACGAATGTTGAGGAGTGAAGGGGAGGAACCGCGTGCGAGTCCCAGGTCCGCCACA  
ATTTCTGTGAATAGATCGCTCAAACGTTTGAATATATGTGTACGTGTGTGTTTGATCAGTGAAGTTTGTTA  
AGAACTTACACCGCTCAGCTTTTGTCTGCTTGGCTTCGTTGTATCCTCGAAGCCAGCGACGACCAAGTAA  
TCCTCTCCTCACCTGTATCACAACAAAGAAATAAGCTTTTTTCTCCTCGTGTGTTTCTTGGGCTGAACCT  
TGAAATCTCCCAATTTTCTGTTAATTTCTGATCATATGTATCATATTCCTTACTTTTCGTTTATATTG  
TGTTTTATATGTATAAACACTTAACGCAAAATACCTCGCAACCAAAACAAAGATTATTGTTGATGCGGTA  
AACACTCGCGAGGGCCTCAATTACCATTGATGGTCAAACGATTTGCAAAATTACGAAATTTACAGATTTT  
GTACAACGCTATACCTTTTGACATAACTTTCTAAAGAACTCACTGTGCGCAACTTAAGATATCCGACAAA  
CGTTTTCTGCCGGAAGAACAGCTTTAATCCTGTTTTCTATTGACTGTATCCATACAAACCGTGCAAAAA  
AAGGTCTGTAAGTTTTTTCATGTTTCGATACGAGGCTGCGAAAAGCAAATACTCTTATATAAAAGCACACA  
ATGTTGACCATTTTAAACAGCTGTATTGATAAAATATTTTCGATGTTTTCAAATAGTCACACAGTTCAAAC  
CAGTAAGGATTACGGAAGAGCGTAAATAACAACACTAAGCAGAGATAACAATGAACCAAACACAATAAAA  
CATGAGAATTTGTTGCAAAACAGTCACCGGATGAGGTTTTAACCGCAATACAATAGACATATTTAATGC  
AATCCGAATATATTCGTGTCTTTGTACCACACGTTGTTTACAACGAGCTTAAAACTCCTTGAAATTGGT  
TTGTTGCATTCACTGACAAATGTAATACTAAAGAGGTTATAACATAGGAAAGGTCATAATTGTAATAATC  
CAAACAAACAAGAAGGTATATTCTATAAGATAGATGAGAAGGTAAACATTACAATTTATTTCCGATGGC  
TTTTATCCAGTACCTTCTTACAATGAAATATGTAGCTGCCTCCAACCATATTATCACGATGCTGATAA  
ATCCATAAGTCATTATTTTCACTGTTGAAATATAAACTTATCGTAATGTTTACGATGGATTTACTGCC  
GTGTCTTACTATCCTTACTGATAACAAAATTCTTTCACTCGTTAACATCATGTTGCATTAAAACTAAATA  
GAAAAATATAAAGTTGTGATATAAAACTAGAAAGATATAAAGTTGTGTTATAAAACTAGAAAAATATAAA  
TTCAAGAAAATCAACAATCCAGTGAATCTTTTCTTTATAAGAATTAGCAAAAAAACTAGGAAGTTGCTTT  
TACAAGAGTTTATGGCTTGNNNNNNNNNNNNNNNNNNNNNNNNNNNNNNNNNNNNNNNNNNNNNNNNNN  
NNNNNNNNNNNNNNNNNNNNNNNNNNNNNNNNNNNNNNNNNNNNNNNNNNNNNNNNNNNNNNNNNN  
TTGCTTTTACAAGAGTTTATGGCTTGGCATGGCCAAGTAGTTTAGGTGCTCGACTCGTAATCCCACTATT  
CGTTGGTAAAAGAGTAGCACAAAGAGTTGGCGGTTGGTAACGATGATTAGTTGCCATCTCTCTAGCCTTAC  
ACTGCTAAATTAGAAATGGTTTGACAGATAGCCCTCGTATAGCTTTTTTGCAAAATTTTCCCGCATGCC  
CAAGCGTGTTCAGGCGTGCGACTCGTAATCTGAGGGTTTCGAGCCCGTCGCGTCAAACATGCTCGCCCTT  
TCAGCTGTGGGGCGTTATAATGTGACGGTCAATCCCACTATTCTGTTGGTAAAAGAGTAGCCCAAGATTT  
TGCGATGTGTGGATGATGACTAGCTGCCTTCTCTAGTCTTACACTGCTAAATTAGGGACGGCTAGCAC  
AGATAGCTCTCGAATAGCTTTGTGCGAAATTCAAAACAAACAAACAAATTTTCGCAAAATATAAAAAAA

TGAAACAAAATAATAAGTGTTTATTTGTTCATGAAAGATTCGGTGAAAATTACACTCGATAAAATAAGGACA  
TGACAATGTTAAACAACGAGTGGGTGGATGTTACGTTTTATAACTCGTGTAAACGGCACAACGTGTGTCGAT  
AAGAGAAAATTGAGATATGCTATTGATGGATGGATACGCAGTATTAATAGTTTCGTGTTTTAACTGAAAT  
CATTATTTATTTTGGAAACATGTATACTTTTATAGTTTCAAACACACAAGTACGTGGGCTACATTTTTC  
CATGCTCACTCTCTGCTTTAACATTTTCCCCAGCGGCACAGTAGTAACCTCTGCGGACTCACACCGCTAGA  
AACTGTGTGTCAATACCCGCGGTGGGCCCACTTTGTGCTTTATTCCAAAGAATCAGTGAATCTGGTATG  
AAGTAATCCGAGTGCATTTTGACGTCTAGGTATAATTTTATGGATAAAATAAATAATACTATGTTTGAAAC  
AGTAACAATCCTTCTTGATATGGAGTATAAACATGTTTCGATCAGTTATAAAGTTAGGGATTAAAAACAGAT  
AACAGAAAGAGTTGCTGGAAAGGCGTCTTCAAGACGCCATCTATGGAAGAATGTACGAGTTTTGTGTCT  
ATTAAAGTAGCACTGGTTGAGGCTGATACTCGGCTGTGAGAGGATTACAGGATTTGTGTTCAACGAGTTG  
ATTATCAGATGAAATTCTGACCTATTNNNNNNNNNNNNNNNNNNNNNNNNNNNNNNNNNNNNNNNNNNNN  
NNNNNNNNNNNNNNNNNNNNNNNNNNNNNNNNNNNNNNNNNNNNNNNGGATTTGTGTTCAA  
CGAGTTGATTATCAGATGAAATTCTGACCTATTTCTTTAGAAAAGAAATGGAATCAAAGACAAGCCGGCG  
CCGCCGTCAAGCTAGAAGACTCTTTTTTCGGAAAGATGACATTTCAAATAAAGCTTCGCATGTGATTACT  
GGGAGAACGACCCCCGACCCTCAAGGTCGACCATACTTAATATGTATTAAGTTTATTTAGCTGACAGTTT  
GCTTTGATAATGGCTTAATTATCCTTTCTATATCCACCAGAACATATGTCAGACCTAATTACTTGCAGTGT  
TTCATTTTGGAGAAAACCAACAACACGAGTTACTCGTTAGAACATTAATACAAACGTTAACTCATGACCCG  
TCTTCGCTCGTCATTAACATTAGAGATTTCAATCTGTATTTTAAGCCACAGTTGTTTGTCTTTAGA  
ATTAAGCACAAAACCTGCACGATGGGCTATCTGTACTCTGTCAACCGAGGCTATTGAAATCCAGCTTCCA  
GCGGTGCGAGTTTCGACAGACATAACGCAATTTACTGTATTGATATGGTGGAGTCCATAGTTTGAACCTTAA  
TGTTACGCTTGTATTTTGCCGTACTGGTTCACATGGCAGCTGAAGGTATAAATGGTACTCAGCGAAGGAA  
TGTGTAGTCTTGTGACCTGTATCGAAGGATGAGGTTTGTGGTTTTTCATTTCAAGTAAGTCGGCCACAT  
GATATAAAGCTCGTTTCGTTTTATGAACACCTCTCATAGCTTGTTCATGAATGTATGTAGTAACAATAA  
TCTTAACTGTCTGTGTATGTCCATGTAACACTATCTATATAAATATAATAGTATTGTGTGTGTATG  
TCCACGTAACACTATCTATATAAATATAATAGTATTGTATGTTGTATTTCCATGTAACATAATCTATA  
TAGATATAACAGTAATCTCTGTTGTATATTCAAGTAACACTATCTATATAGATATAACAGTAATGTCTG  
TTGTATATCCAGTAGCTACTGTCTATATAGATATAGTATTGTCTTTTGTATGCTCATGTAACATAATCG  
CAGTGTGTGATGGATCTTATCAAAACAGGTTTGGAGCTTTATTAGGTACATGCGTGGTTAGATACTACTTT  
TCAATTTTGTATTTTGTGTTTTGCGATTTTTTGGAGGCGTTTTTGCCTTTTATTATCCCTTTCTTTACCC  
TCTGTTGATTGACTTTTACCAAATTTGGTATGGAAGTTTATTGGGTACACGGAAATACGCATGCTAATTT  
TTGGTTTTCACTTTTCTTTTCTTGCAGTTTTAATAAGCGTTGTTTTACAATTATGTGCAAGGGAAGCAAC  
TTTTTATGTTCTAAGGTAACCTTTCAGTAACCATGATGTTACATAACTTCCGTCCAGAGCTGGACAGGTA  
CTGTAGCTAGTATTAAATAAATGTTGCATTTTCTAAAATTAATTCTACTCCATCTGGTATAGGACAAG  
TACGTATTTAAACCGTTTTTGAACCTTTTTGAAAGGTAAGCGGTGCAGTGTCTCTGTGTTCTTATTCTGA  
AGTAATTGCAACAATGAAACACGTTTTTAAACATATATAAACTCTTCAAAGTTGTTTTATTGGAATATA  
GTATCAAGATATCAGCTTGTAGTTTAAAAAAAACAAATAAAAGTAGACTTCTCGACTTCCAGGT  
GATTGATTTTCCCAAGTGATTGTAATTTACCATTTAAACATATGTTTATATATCAGTTGCTATTTATAAA  
TAAAGGGGATAACCGTTTATTGTAAATTTAAGATACTGGAACCTTTATTCTGAGTGGTTTACAACCCTAAG  
AAACTACTATAGCTGGACTTGGTTGTAAGATTTAGAAACCCAGCGATTTTACTGTTCTATTTATATACGT  
ATTAAGATCTTCTGTTTGACAGCTTCTGGTTGTTGATTACCCGGGAGGGTATTCCTCAAAAGGTCCGCAC  
CTTTGGAGATGCACAAAGGCAATTTTCTTGAGTGATTAGAACTAAGTACCAGGGCCCACTGGTTCTCA  
ATAGAATACCTCCTTCTTCTGTTTACAGCAATTATTGGAGGTCCGATAGGAACCTCAACACCACACTTG  
TCTCCTGATGGGTCGTGTGGTAGTTGAAGGTATAGAAGAGCCAGTCATAATTTTCGGATATCTCGCACGT  
GCAAATGACATCAGCACTCCATTTGGTTATAATTAAGAAAGCTTGTCTGATTTTGGCTTAAGGCCAATGC  
TTTTCCCCAGTACTAGTTCTGACCTCTTTAAGGATTTACTAACTGAAAAGCTCATCAGTGCTATCTGCGT  
TCGGCATTTGTGCGTTGTGCGCGCTTGCTTCCAGAACCCCTGTACAGTGACAATAAACAACCATAATTTT  
CTCGTTCACAGACAATTTAAACAGCTGCTAGACAATACAATATTACTGTATCCAAGCCTAGGATGAGTCA  
CACTCAATTTATATTGTTAATTTAGCCAGACAGATTTGGATTGTTTTTAATGAATATTAAGAGGTTTTTT  
TCAATGAACATTTCATTAACATGAAACACTTACTGACAGATAGAGCTCCTATATTAATAATGATATTTTGT

ATTTATGAAATACGAATACATACCTTACTTGTAAGTTTAAAAACATTAGTATGTTAAGAAAAACCTGG  
AATATGCTATATATCCTTTTATTTTTTGCCGAATATAAAATAAAATTGAAAATAGTTTCACCTGTAAAA  
CCAAGTGAATTTTATTCAGTTCAGGTCTGTTCTCATAGTTTCAGGATTTTACTGTAATCTTCTTTACAA  
TAAACCAATTTTTTTTATTAAGAACTTTTTTCATAAGTATCAATTTAACTCTTTCACAGCTTAACAT  
GAATTCCTCTTTACCTTGAAACAGATTCCATAGATGCGACTTCCGACGGAAATTCAGAAAAACAATTCCTC  
TGCAGATGAGGACTCGCAGCTGCGCATGCGTTTAAAGAGAAAACTTCAAAGAAATCGGACATCTTTTACA  
AACGAGCAAATCGAAGCCTTAGAAAAAGGTAAGAATTCACTCGTACTGTCTAAGTCTTCAACTGCAAAAA  
AAAAATAAAATAAAATAAAATAAGTAGAGTACTTCTATTGGTCTATATTAAATGTAGAATATTTCTATTGG  
TCTAAACAAAAATAATTAGAAATATTTTTCTTCGTTTTTATTTTTTAATGTTTTAATTTGAGCTGTTAAA  
AAAACGTAATATTCTAATGCACATAATTTTCATCTAATTCAGAGTTTCGAAAGAACACATTATCCAGATGT  
ATTTGCAAGAGAAAGATTAGCTGAAAAGGTCACTCTTCTGAAGCTCGTATTTCAGGTATAACTGAAAAACA  
ACAAAAATAAAACGTTATTTACAGCACTGATGATGGTGACTGTGTCAACAAAACTATTAACATAAGCA  
CCTAATGAACCTTATGTTCCATTGTTTTGTGTTCTTTTGTCCATCTGCATATTGTGTATTTATATGAAAC  
TACTGGTATGAAATGTACAATTAAGTAAACCGTTTTTACCCTAATCATTGGTAAAAAGTAATTTAAGCA  
CATAGATGAGAAATAAAACAAATAACCTGAACATTAATCAAATCAATCCGGTTTAAACAACTTATCGATA  
GCGCCAAATATCGTAAGTCAATACGAACGGAAATTAATAATGATTAGATTACGCTGAAATATCA  
TTTGGATATAATCTATTCTTCCATCTATATTTTGGCCGTAACGCCAATAATTTTTATGAAATTTGTCCA  
GCGCTGGATATTGAGGTTGGTACTAAGTCCATGTACTAAGTTAACATATGTCAAACAATTTCTCATAAATA  
TAAAGTATCATGAAAAATAAATTCATAATACAAACGATGTTTCGTGTGTGTTAAACAACCTGAACAAATG  
CTGTCAATGAACTAGCTTCAAAACAAAAATGGAATATAACATAAAAAAACTAGTTATTTCAGTCAGCTTA  
GAAAATTTAGGTTAGTTCTACACCAATATATTAATTAACAATGCTAAATTAGAGTGATTAGACCAGATT  
TATATAAAAAATACAATAGGCTAATGAAGTTGAATAAGAGAAATTCATTGTTCTTCAAAATCAGTCACCAG  
AAGTGAGGTAGCTAGAACTAACTGAGAAAAAATGTTCCCGTTTGCCTTATTTATTTAGACTCATATTT  
CGAGGATAAATTTGTTTGAGACAATCGAACAAGACTTCCAGGGTCTTTATGGTTCAGGTATATTTGAAA  
AGCTACATTTTAAACGCATCTCCAGTTTCCAGCCGAACAGATAAATTAGAAAGAATAAGTGGTAAAAACAA  
GCTAGCTGCAGTAACATGTTTTAATTACTGAACATTTTCCATTGTTCCGTGGTACTTATTAGTAAATGTT  
CATAAAGTCCCAAATAAACTTTGTATATAATCTATTTACATATCTTCATTGTCAATTTGTAAAAGGGAGAA  
ACTGAAGATTTTTATTAATAATATTTATTTGTTTCATTCTCAACATTCGTATTAAAAACATCTATTTAGG  
TATGGTTTTTCCAATCGTCGAGCAAAATGGCGACGAGAAGAGAAGCTTCGTAACCAAAGACGTGCAGTCGA  
ACAACCAACAGGTACAACCTGTGCTAGCACCACCTAACGGACGACTTCCAATTAATGGAACCTTTTATAAC  
TCTATGTATCCATCACTTGGACAACCGATGGCTGGAATGGGAGATTCTTACAGGTTAGTTGAAATGCTCC  
TTTTTTAACACATCTCTAATTTCTAGCCACAATAGACAAATTAAAAAAAGTAAATGATAAAATAAACCA  
TATGTAGTAACACGTCAACATTTAAAGTTCTTTTGTGATAATTCGAGAACAAGCATATCAGATTAAAGCA  
TCTGTTATTTGTGAAACACGTTGAGGTACTTCAGATGCAAGTCGGCTTGTGGTGGTCTAACTGGTATCACT  
TGGCTTTAAATTAATTTTAAATTTTATTTGTTCCAAATTAACTACAAGGTGTTTAGAGCGCTAGACTCGA  
AATCTGAGGGTTGCGAATTCGAATTCACAGCCGTGTGGGCGTTGTAACGTTACGACGAGTCACACTATTT  
TTTGGTAAAGGAGTAAACCAAGTAGCAGTGGGTTGTGATGACCAGCTTCTTCCCTCTAGTCTTACATGG  
CTAAGTTCCGTACGGCTAGTGAGATAGCTCTCGTGTAGCTTTGCGCACAATTACAAAACAGACAAACAA  
ACAAATGTAAACACGTAATTTTTTTTAACTAGTATTTCTACAATTGTCTCTAAGTGTCCATTTGTGAAGTT  
CTTTTCAATATTTCTTTGTGATTAGAAACCGAACGAATTATTTGCTACGTGTACAGAGTGGTTTGATTNN  
NNNNNNNNNNNNNNNNNNNNNNNNNNNNNNNNNNNNNNNNNNNNNNNNNNNNNNNNNNNNNNNNNNNN  
NNNNNNNNNNNNNNNNNNNNNNNNNNNNNNNNNNNNNNNNNNNNNNNNNNNNNNNNNNNNNNNNNNNN  
NNNNNNNNNNNNNNNNNNNNNNNNNNNNNNNNNNNNNNNNNNNNNNNNNNNNNNNNNNNNNNNNNNNN  
TGATTGGCCACGTGCCATAGTTATGACCGTTTTCAACACATTGAACATGGGTACATGTTTACTCATACT  
TGATGTATCTGAAGTTTGTCTGCGTTACTTCCCTTAGCTCAGCTTAAGATCAAATTATAGTTGATACA  
TGATGGCAAATCAAATTTCTTGTGGCCTAGTATAAGTATTTAGGGTAACCCGGATCTTGAAGATAGATT  
GTCTGTAATTAATTTGCATCAAGAAACAGTACAACCTGTTTGTGCGATTAAACAAAGACTATATATACCAGAT  
TTTCCGGGCTGGCATGGCCTAGAGCGTTAAGGGGTGCACCTCGTAATCTGAGGGTCGCGCCAAACATGC  
TCGCCCTCCAGCCGTGGGGGCGTTATAATGTGACGGTCAATCCCACCTTTTCGCTGGTAAAAGAGTAGCC  
TAAGAGTTGGCGGTGGGTGGTGTGACTAGCTGCCTTCCCTCTAGTCTTACACTGCAAAATTAGGGACGG

CTAGACACAGATAGCCCTCGAGTAGCTTTGTGCGAAATTCCAAAAACAAACAAACAAACAAACAAATTTCTC  
CCAACATATAAGCCTCACCTGGATTATCGACTCCTTCACCGATCAACAAGAACCCTAACTTTCTATCATA  
GATAAGTTTATATTGCGAGTTCTTAGCTTTTTGATTTATTTACTTCTTCATTATTAAACACAAAGCTTCACA  
ATGGGCTAATTGTTCTGTGCCACTTTAACTATCGAAATCCGGTTTTATTGCTGCAAGACTTATCGTTAA  
GTTAATAGGCAAGGAGGGTCTTAGTTTATATCCAATATAAATAAGTTATGAATTACGTAAAAGTAATTA  
TATCTAATTTAGTTATATTTAATTTTCGTGCAGGTTAACAAACACTGACTATTAAATGTGTTACAATATT  
TAACTTAAGCACTGCTCGGCCCGGTTAGCCAAGCTCGTTAAGGCGTGCGCCTCGTAATCTGAGGGTAGC  
GGGTTTCGCATCCCCGTAGCGCCAAATATGCTCACTCTTTCAGCCGTGAGGGCGTTATAATGTGACAGTCA  
ATTCCACTATTTGTTGTTAAAAAGAGTAGCCCAAGAGTTGGCGGTAGGTAGTGATGACTAGCTATCTTCC  
TCTGGTCTTACACTGCTAAATTAGGAACAGCTAAAAACAGATAGCTCTCGAGGAGCTTTGTGCGAAATTAA  
AAAAAACAAACAAGCAATTAACCGCTGTTTCGTATATATATCATTGACGTTTTACTTTGGTATACTTCTCT  
AAGCCTATTTTATAATGACTTCTTGCTGATAACGTCTACTTGAAGTTGCCAAATTACCAGTAACAGATTT  
GGTAATGTATTTTCTTTAATAATATTTATACTGTTTCTTTCCTCTGTTTTAAGTTATGTAGGCATAGGC  
AGTTTTTAATTTATATTATTTCACTTTTCATGAAAAACAGTTAATATAAATGATTCTGTGTTTTATTAGATCG  
AAGTAATTAACAAGAGGAAAAAGGTGCATTTTTTTCATTATGTTTAAACTTTGTAGTAAATTGTAGAAATA  
GCTGTGTTGTGATTAGTTTTATATATTTTTTATTTTAATCATGTGATGCATTTGACTTTTGATGTTATCA  
AATATTATTTAAAAAATCTTGAAAAATATTTTTTCTCAGTATTAAAAACAAACACTACATTTTCGTGCGA  
CACTTACCTTAGACATCATTAGCATATTTAGTCGACGTATTAAAAATCCCCCGGTACGAAAAAACAACT  
CTCTAGACGTGGCGCCAAATTTTGAAATATTATGTCCCAGAAGACGCTGGTTGGTAGAAATAACCATCTA  
CTATACAGAACTTTTTCCAGATTTGAAATCATGAATTATGAAAAAAAGGCACAGCTTTAAATAGCAGT  
AATAGTTTTAGAGGTTTCAGGTTTTCCATCTTCTCCAGAATCAACATCATACAACTTGCTTTCTTTAAT  
CTAATTCATTTTGACCTCTCAGATAACTTCTTTGTGAGTACTTTCCTTCCCCGCTTTTCAGCGTCATTT  
TTTGCTTCAAATTAATACAATGTGTGTTATTCAAGCATCGATTTAAATACGAACAACATGTACAAACAA  
GTTAGGCAATGCGAACTATTATACTATTTTACGTGTTTTAATTAATTAATGTGATTTTGACAATGAATT  
TATGATTATGTGTGTGGTGTTTTACTAGTAATATTTCTGTTAAAACTACTTTTATAAGTTTCTATCTTAT  
GGTAAATCGATTACAAAATTTTAAATTATTATTATTGACTTATAAATGAAGAGGTTATAATGAAAACCTG  
AAACTCTGTATGCAGATAATAAGTATGTAAGAAAAAGGTTGTTCCATCGTCTGTAGACAATTGTGACTAC  
GCCATAAACTTTAGGCGCAATAGTTTACAAATGACTTCTTATTTTAGACTTCTAATACGAATTAAGTGA  
CAACTTGTCAATCCTATGTATTTACAGTGTACCACCACCATCCAGTATAGCACCAAAATCATTGTGTGCAG  
CAGCGTGATCCAACCTCTTACACCTACATGTTTCACGATCTGGGATCTTACTCACGATCATCTTGTACAG  
CCAGTCAGTCAATTAAACGGACACCCGTCTTACTCTGTTAATGGAGGAAGTGCGCATGGTGCAGGTGAGTA  
AAGAACAGTGTGATACACACAGAAACAGTGTGATATACACACAAACAGTGTGATACACATACAAACAGT  
TGATATACACACAAACAGTGTGATACACATACAAACAGTGTGATATACACACAAACAGTGTGATACACAT  
AGAAACAGTGTGATACACACACAAACAGTGTGATACACATACAAACAGTGTGATATACACACAAACAGT  
TGATATACACAGAATACACACACTCACATAATTTAAATTATTTTATTTGTGAAAATGTGGCATAAAGTTG  
AGTTTATATTGTTAATTNNNNNNNNNNNNNNNNNNNNNNNNNNNNNNNNNNNNNNNNNNNNNNNNNNNN  
NNNNNNNNNNNNNNNNNNNNNNNNNNNNNNNNNNNNNNNNNNNNNNNNNNNNNNNNNNNNNNNNNN  
CTACGTGTACAGAGTGGTTTGATTTGCCACGTGCCATAGTTATGACCGTTTTCAACACATTAAACATGGT  
TCACATGTTTACTCATACTTGATGTATCTGAATTTTTGTCTGCGTTACTTCTTTAAGCTCAGCTTAAG  
GTCAAATTATAGTTGATACATGATGGCAAATCAAATTTCTTGTTGGCCTAATATAAGTATTTAGGGTAAC  
CCGTATCTTGAAGATAGATTGTCTATAATTATTTTGCATGAAGAAAACAGTAACTGTTTGTGCGATTAAC  
AAAGACTATATATACCAAATTTCTCCAGGCCTGGCATGGCCTAGCGCGTTAAGGCGTGCACTTCGTAATCT  
GAGGGTCGCGGGTTCGCGCCAAACATGCTCGCCCTCCCAGCCGTGCGGACGTTATAATGTGACGGTCAAT  
CCCACTTTTCGCTGGTAAAAGCTTCACAATGGGCTAATTGTGTTGTGCCCACCTTTAACTATCGAAACCCG  
GTTTTATTGCTGCAAGACTTATCGTTAAGTTAATAGGCAAGGGAGGGTCTTAGTTTATATCCAATATAAA  
TAAGTTATGAATTACGTAAAAGTAATTATATCTAATTTAACTTTTCGTGCAGGTTAACAAACACTGACTAT  
TAAATGTGTTACAATATTTAACTTAAACACTGTTTCGGCCCGGTTAGCCAAGCGCGTTAAGGCGTGCGCC  
TCGTAATCTGAGGGTAGCGGGTTCGCATCCCCGTAGCGCCAAACATGCTCACTCTTTCAGCCGTGAGGGC  
GTTATAATGTGACAGCCAATCCCACTATTTGTTGTTAAAAAGAGTAGCCCAAGAGTTGGCGGTAGGTAGT



ATGACTAGTTATCTTCCATCTGGTCTTACACTGCTAAATTAGGGACAGCTAAAACAGATAGCTCTCGAAT  
AGCTTTGTGCGAAATTAAAAAAAACAAACAAGCAATTAACCGCTGTTTCGTATATATATCATTGACGTTTTT  
ACTTTGGTATACTTCTCTAAGCCTATTTTATAATGACTTCTTGCTGATAACGCTCTACTTGAAGTTGCCAA  
ATTACCAGTAACAGATTTGGTAATGTATTTTCTTTTAATAATATTTTATACTGTTTCTTTCCTCTGTTTTA  
AGTTATTTAGTTAAGTAATTAACAAGAGCAAAAGGTGCATTTTTTTCATTATGTTTAAAACTTTGTAGTAA  
ATTGTAGAAATAGCTGTGTTGTGATTAGTTTTATATATTTTTTATTTTAATCATGTCATGCATTTGACTT  
TTGATGTTATCAAATATATCTAAATAATCTTGAAAAATATTTTTCTCCTCAGTAAAAAAAACACTACATT  
TTCGTCGGACACTTACCTTAGACATCATTAGCATATTTGGTCGACGTATCAAAATCCCCCGTCCAGAAA  
AAACAACCTCTCTAGACGTCTCGCCAAATTTTGAAATATTATGTCCAGAAGACGCTGGTTGGTAGAAAT  
AAGCCTCTACTATATAGAACTTTTTCCAGATTTAAAATCATGAATTATGAAAAAAAAGGCACAGCTTTA  
AATAGCAGTAATAGTTTTAGAGGTTTCAGGTTTTCCATCTTCTCCAGAATCAATATCATATAAATTGCCT  
TGCTTTCTTTTAATCTAATTTCTATTTTGACCTCTCAGATAACTTCTTTGTGAGTACTTTTCTCCCCGCT  
TTCAGCGTCATTTCTTTGCTTCAAATTAATACAATGTGTGTTATTCAAGCATCGATTTAAATACGAACAA  
TATATACAAACCACACAGACGAAGAAGGCTCCTTTCTTTCTATGTTTATATTCCTGGAAAAGCATTTTAC  
AGATTTCACTTATGAGTATATATTTTTTCAATCAGAAGAAGAAATTCTCTTTTATATTGTTTTCGGGTCT  
GAACGTATATTTCTAAATCTGGGTTGGTTTGTCTTTTTCTTACAATTTTAAACATTTCTAAGTCATTC  
AGCTCATCATTTCTAATGAAGTATTATTTGGTTTTATCGGTGGTTAGGCAATGCGAACTATTATACTATTT  
TACGTGTTTTAATTAATTAATTAATGTGATTTTGATAATGAATTTATGATTATGTGTGTGGTGTTTTACTAGT  
AATATTTCTGTCAAACTACTTTATAAGTTTCTATCTTATTGGTAAATCGATTACAAAATTTTAAATTAT  
TATTATTGACTTATGAATGAAGAGGTTATAATGATAACCCGAACTCTGTATGCAGATAATAAGTATATA  
AGAAACAGGTTGTTCCATCGTCTGTAGACAATTGTGACTACGCCATAAACTTTAGGCGCAATAGTTTAC  
AAATGACTTCCTATTTTAGACTTCTAATACCAATTAAGTACAACCTGTCAATCCTATGTATTTACAGTG  
TACCACCACCGTCCAGTATAGCACCAAATCATTGTGTGCAGCAACGTGATCCAACCTCTTACACCTACAT  
GTTTCACGATCTGGGATCTTACTCACGATCATCTTGTACACCCAGTCAGTCAATTAACGGACACCCGTCT  
TACTCTGTTAATGGAGGAAGTGCGCATGGTGCAGGTGAGTAAAAAACAGTGTGATATACACACAGAATAC  
ACACACTCACATAATTTAAATTTTTTTATTTGTGAAAATGTGGCATAAACTTGAGTTTATATTGTTAATT  
NNNNNNNNNNNNNNNNNNNNNNNNNNNNNNNNNNNNNNNNNNNNNNNNNNNNNNNNNNNNNNNNNNNN  
NNNNNNNNNNNNNNNNNNNNNNNNNNNNNNNNNNNNNNNNNNNNNNNNNNNNNNNNNNNNNNNNNNNN  
GTTAATTCTAACTAAGTAAATATGAGTATCAGAAATTAGATTACATGAAAATAAAGTGTAAATTACACTG  
CTGAATGCCAGAGGACAATGTTTGATAAGACTAATTGTTTTTACAGTTTTATTAGAATAGTACAGACG  
TCTTTTATACACAACTCTTACATATATATATATATATAGTAGTTTTTAAACACGGAGTTTCTTATTATTCCA  
G**GTGTAAATTTCTCCAGGTGTGACCGTTCCTCTGCAGGTACCAAGTCAAGGTCCTGATTTGTCAATGGCAA**  
**CAAATTATTGGCATCGTATTCAG**TGACCTCAAATTTATAGAAACGACTACTATTTCGTTAATTTTACCTTT  
TAATGCTACAATAAAGCTTTGGTTAAGCTCGGATATATAAAAAGCGTTTCTTTGAACAGTGGAATAAGGC
