# Supplementary material for: Evolutionary Conservation and Diversification of Five Pax6 Homologs in the Horseshoe Crab Species Cluster
Source: MDPI journal article supplement (doi:10.3390/arthropoda2010007), 2024-03-04
Supplement: s1 [file s1]

>QXHF01007861.1:c1083867-1039138 Tachypleus tridentatus isolate BBG1 scaffold2275, whole genome shotgun sequence

TCCGATTTTACTCAAGCGTAAATTTTGAAGCCTTCTTTTCTTTTTTCTTCTTCATAGCTAATGAATG  
ATGCTACTCTTCCCCCAGGACACAGCGGTATCAACCAGTTGGGAGGAATCTACGTCAACGGACGGCCCT  
TGCCAGACTCCACACGACAGAAAATTGTAGAACTGGCCACAGTGGTGCTAGACCCTGCGATATTTACCG  
AATCCTTCAGGTGTCTAACGGCTGCGTTTCCAAAATCCTAGGCCGATATTACGAGACCGGGTCCATTTCGG  
CCCCGGGCCATCGGTGGGAGTAAACACGAGTGGCAACTCCCGATGTAGTGAGCAATATCGCCCAATACA  
AAAGGGAATGCCCTTCTATTTTGCCTGGGAGATTGAGATAGGTTGTTGTCTGATGGGATATGCACTAA  
CGACAACGTCCCAAGT

GTAAGTTTGAAGATTTTGTTAACATTCTTGTAAATTATTTCTGATTACATAATTA  
TAATAGCAAAC TAGTAAGCATCAATACCTGTAGAGAGTCGACATTTTCATGAGGCATTCTTTAATTTGAA  
ACCAAATAGAGTGGACACATTTACTAATTACATTTGCAGCAAAAACAAACAAACAAAACAAAAATGAATG  
AACAAGGTATCAGGTCTTTTCTGATGAACCTGGGTGTGTGTTACTGGTCTTCGTGAGATGTGCTTGGGTT  
GGGTTTGTGTTACTGCTCTTCTGTAAGATGTATCTGGATTTGTGTTACTGGCCTTCTGTGAGCTGTACCT  
GGGTTTGTGTTACTGGTCTCGTTAATCTCTTTAACCCATAAATCACGGATTTATTGTAAAGATATTGTC  
ATTTTGATTCAACAAGACGAAATCCAGCAGTCCAATCTGT CATATGAGTATTAGTTTAAATTAAGGTTCA  
AACTCTTGCTTTGACAAAAAACAAGCAAATTAATAAATAAACAACGACACTTTTTTAAAAAATG  
TTGATGAAATGTCTTCCAGTTCAAGGATACTTTAACCCCTGAGCTATTCCATTTTGACCTTTTGCGCTTT  
AATAACAGGTTTAAACATTTTCGTTTCGCCGAAAACATTCACCATGTTTAGCACAAACAATACTAAAAGT  
ATATATTTTACCTACTGATAATAACTTTCACTGGTTGAGGTCTGATCAATCGTATCTAAGTTTCTCAG  
CTACTGAAAGATCTAAGACGAAACAAAGTGGTAACATCCTGAAGAACAAGATGCTTGTCTCACTGTTTT  
ACGAGTCAAGTGCCTTAACCATCTCGTAATCCAAGAGTCGCGGGTTCAATACCCGTCACACAAAACATG  
CTCGCCCTTTCAGCCGCGAGGGCGATATAATGTTACAATTAATCACTCTATTTTGGTAAAACAGTAGCC  
TAAAAGTTAGCGCGGGTAGTGATGACTATCTTCTCCCTCTAGTCTTACACTGCTTAATTAGGGACGG  
CTAGCGCAGATAGCTCTCGTGCAACTTTGGAATGCGATTTATATTTCTGATCAACTTAACACGAACTTCA  
TCGTAAATCTATCCACATAATTCCTGATCACTTCTAAGTTTAAACACCACGATAAATGGATGGACTCTATC  
CACAACGTTTGAATTTCTTTTAAATCATAACCATACAACCGGACACTCGCAGCTGAACTACAATAAACA  
TGACTTTCTGACATTTTCTAGTGACTATTTTAGTTCTGAAAAGAAGTATTCTATACGTATATTACATT  
ATCTTTACATGGATATTGACAAACGGAGAGTTGGGGTAGAGAATTACTTTCAAATGAAAATTTCTTTAT  
AAGAGGTGAACCGATGAACACAATAGTTTGAAATATCTAATACTAAGGTATCGTTGCAACGGCTTTTATC  
ATTTAACAACTGAATTAATAACTAAATAACTATTTAATAATAAATAACTAATAACTGATTTTAATAACT  
AAAAAACGCCACTAGTTTATGTGCGAATGATTTCCAGTTTTAGGGTTAAACAATGATTTTTTTTCTTTT  
AGTTTTGGTTGGTTTCTTTCGAATTTGGCGCAAAGCTACACTAGAGCTATCTGCGCTAGCCATCCCTAAT  
TTAGCAGTGACGACTAGGGAAGGCAGCTAGTCATGAACCCCACTACTAACTCTTGGGTACTCTTTTG  
CCAACAAATAGTGAGATTAACCGTCACATTATAACACAGCCACGGCTGAAAGGGCGAGCATGTTGCGGTGT  
AGCAGGGAATCGAACCTGCGATCCTCAGATGTGCCTTAATCATCTGGCCATGCCGACCTTCTCTTTTAG  
TACAGCTGATATTATTCGTTCTACTAACATTCGTTTCTTGACTTCGTTAAACGTACTCAGAACGTACTGT  
GAAAACGATTAATATTTAATAATAAGTGCTCTTCATAAGCAAACATTTACCGAGTTTATATCCCTCACA  
CTTTGAATGTTAAGGAAATAAAAGCACTTTATATGACCTATGACTTTTTAAGTATACTGGTATTAATACC  
AACGAGGCTGTGAAAGTTTAAATCTCCCATTCCTGGGGTTCCTGTGATGGAAAGTCTGATATTACTGTT  
TTCTAACGCTACTTAATGATGAAAAGTTAAGCCTTTCATTGCAAGTTTTTATTCCTACTCAGATTACCAT  
TGCATTCGAGGTTTAAAATGACTGTTGCTACGCCTGTACATGTTGCAGCAGGGCATCTGGTTTTGTCATG  
CAGTGAAACTAATATCAAATTTAATTGGACATTTGAGTCTTCTTGTGTTTGTACGTCAATTTGTAATGGATC  
TGCCATATGTATTTACCCAATCAGAATGTATCTTTTATTTACGTAACAAAATTATACCAGTTACTCATTT  
TCAGGAATAATGTGTTTGGTGTTTTTTTTTCAGCCACGAGTTCAATTTATATTCAATCAACATTATGTTCA  
ACGGGAATAGGTAACAGAGAAATCTCTAACAGTTTAATTTCTGTGAAATAATGACTCACACAAAGTTAAAT  
TATATTTAATTGCATGAACGGCGATATCGTAGCCAAATAAACAACCTCGAGATGACTCGCATTAATCATA  
AACAACAGTAAGTTTGTATCACTCGTTTAAACGTTGAAAGCTGGCGAAAACAGTAGGCCATAATGTTAG  
TTATGAAAATCACATTAGACTACAGATGTGTTTTTTCTTATATTTTCTTGGTTATTCCATTGCGTATCG  
CAAATCAGTTTTTTGTTGTTGTTTATTTTAGAAATTCGCACAAAGCTACACGAGGGCTATCTGTGCTAGC

CGTCCCTAATTTAGCAGTGTAAGACAAGAGTGAAGGCAGCTAGTCATCACCACCCATTGCCAACTCTTG  
GCTGCTCTTTTACCAACGAATAGCGGGAATTGACCGTCACTTTATAACGCCCCACGGCTGAAAGGGCGA  
GCATGTTTGGCGCAACTGGGATGCGAACCCGCGACCCTCAGATTACGAGTCGCACGCCTTAACACGCTTG  
GCCATGCCGGGCTCGCAAATCAGAGACATAATAACAGTATTTTATTCTTGTTATTTGTATTTGTATTTA  
TGGTAAAAAGTACTAAGTCTATTTACTGCAAGTTTCTAATTTTGAAGTACTGACCACAGGGTAAACAACT  
AGTCAACATGACCATAACATTGTTTTCCGATGAAGACTTCCATTAGAGGGACGAAAGCACACAAATAAAA  
GTATTTTAAACGTAAAGAAATGTCCGTGTATAACTCTATATATTAATTTTTCTACGTTATGAGTCTTAAAC  
AACAATTATTCACCATCGGTGCTAAGTGATTGACTATCACTCTTATACCCAAAATTTAAAGAGAAGGTAA  
TACAATGGTATCACACTGGTTTTAAACCAGCTCTGAAATCCAGGGCGCTAGTCCTCACCAGTCTTCGCC  
TACCAGTGTGCGGTCTTTTCGTTAATACCAAAATTCTTAAGTTGCGGCGAACGAGATGACAGACAAACAA  
CTGTCCGGTTCTAATTTGAAATCCTAAACACATTATTAATTGAGAAAAATCGGAAAAATATAAATCGATT  
TTACGATACATTTCTTTATTAATAACGTTACACTTAATGGTAAATTTTGTGACTTACACCAACTCATATA  
TATATATATATATAATATATATATATATATAGATATAGATATCGATACGTAAGTTACGAGAGTA  
GCACGTGACTTACGCAATGACATGGTTATTTGTGTCGTCGATTTCATTATGGTAGGTATAGGTGT  
TTTTGAGGGCGAGAGAAAGATTTGATATGACTGTCGTTTAAAGGAAGTATTTATTTAATGTGTACACAGAC  
TGGCCCAATTCAGAGTTAATCTCATATTTCAAAGGTTTAGGCTAATATAAACTTCATTGACGTGCAGAT  
GGCAGTAAAAGAGAAAGATATTACGAACCGAAAAGGTCGCTTTTTAACTTTTGCTTATTATTACTTATT  
AATAATAGGGCTTGGTGGTTAGAGTGCTTAACTTATAATCTGAGGATCGCGGGTTCGAATCCCTGTCA  
TCAAACGTACTCGCCCCTTGAGCAGAGAGGGTATTAAGTTGTGACAGTCAATTCACCATTTCATTGGTAA  
GAGAGTAGCCCAAGAGTTGGCGGGGAGTAGTGAAGTCTGTCTTACCCTGCTAAATTAGGAATGGCTAGTG  
CAGATAGCCTTCGTGTAGCTTCGCGCGAAATTGAAGACAAACCAAAACGCCTAATAGCGTATCAGAGTTT  
GTCTTGTGTTTGTATACCGTTAAAGCTTAAAGTACCTGCGTTTAAATTAATTTTAAAGCTGATTTTTTTT  
TTCATAACAACTCGCAACAAGAACCAAGAAATCTTTTCATAGTTGTTGATAATTTTACGACAGAGGGG  
GACACATAAGAATAGGAAGGTATGGACTTGAGCTCATCCAACCAACCACCTCCTTTGGAGGTATCACTGT  
TAAATTAGTTAGTGTCTACCAAAGTGTCTCAGTGTCTTGCCTCATTTATATAGGAAATTATTACCAATAT  
AATGATTATTGTAATTAGGTGTTTTTTGTTTTGTTTTACCAACTCAACTTCTCTGTTTCAGTTGAAAACT  
TAAAATTTCTTTAATTTATTTTTCAAAAAATCTCGCGTCTGCGCTTGGGTACAACGATTTAAGATTCT  
TTGTAATTGAACCAAAACCAATTTAATATGCTTGTAATTTACAGGCTCCATCAGTTTAAAGTTTAAATGGA  
CTTAGCATTTACTTCGGATAACAGTCACTATCGTTGCTCAATATCCATTGTATACATATGCATACATACA  
AGTACATATTAAGAAATATGTTTCTATGCATAAAGAAACGTTATTCTCTGTGTGAAACTAGATGTATTGA  
GTGTTATTCTCTGTGTAATAATTAGATGTATTGAGTGTTATTCTCTGTGTAATAATTAGATGTATTCCACAT  
TCATATGTCGGCCAAAAATTTAAATTTATTTGAGCGTTTCTGAAAGTCATTTCGTGTAGTTAGCTTACAG  
TCCATAAGGTGAGATTGGACAGCGTTTCGAAGAAACGTTAAAGAATCAATATTGTCTTGCCTAGAACAT  
CTATTGCATAACTCGTATCATCATAGAAGTTAATCTGTTTTTCATTCATCATATTTTTTATTTTATTTCAA  
CGTTTGAATACAATCGTTTAGAGGCGTTAGTCTATAAAAGGTGATTCTGCGGTAAACATTTACCATCGAT  
TTCTTTGTAGATCAATGTATCGATATGAGAAGTTTAAACACAGTGTCTCCTAGATGTAAGCCCTCTATAG  
GATGTACGCACCGTGCTATTCTACCCTGTGTTTCACTCTCTGGGCTCTAAGTAATCGGTATCTTGCTTCT  
GCTAACGACAACAACGAGATTGCTGCGTTCCCTAGCGGTACAGTAAACCAATTTGTGGCGGTAAAAACGA  
GAAGCTATCTCAATTTCCAGCAACGGTAGGTGGGAACCTAACTAATTTTGCCGCCACTTAAACGAGCTTAC  
TTCACCACCTCGTGATACCAATAACAATGCTGGGAAGTGAGAAAGTGAGAAAGGTACCCAATGAACACTTG  
CATTCGTTTCAGCGTTACAGACTAAGTGAATTACACGAGTCTTGCGGATAGTTAGTTGTACATGATGGTCA  
GTTCTGCTCCTCGACTGACACTTAAGTGTTAGCTGTTACCTAATTACATAATAGGACCTGAACCTTAG  
TACCTTGTTTTCTCGAATTTTGATTGAAGCAAGGATAGATCGAAGCGTTTAAAGATTTTTGGTTCAATTA  
AGATGTTTCGTATAGATTGATTTGTTGCAAGTGACAGACAGAAATCTATCGCGTTTTAAACGTAACATC  
TGCGTTTTATAAATTTGTAGTATTGACAATGCGTCGAATACAAAGTTTTTGTAACTGAGCTGCGCAGTATC  
ACAATGAGAAACATATAATGCTTACTTTTTGAGTCTTTTCAATATAAGGGACTCGAAAAAAGAAAAACAAC  
AACATTATATTATTGTTTGTGTTGAATTTTGCGCAAAGCTAGCTACTCAAGGGTTATCTGCGTAGTCGTC  
CCTAATTTAGCAGTGTAATACTAGAGGAAAGGCAGCTAGTCATCACCACCCACCGCCAATTTCTTGAGCTA  
CTCTTTTACCAACGAATAATGGGATTGACCTTCACAATATAACGCCACACGGCTGAACGGGCGAGCATG

TTTTGTGCGACGAGAATT CGAACTCGCGAGCTCTTCGATTACGAGTTGAACGCCTTAACCCACCTGGTAA  
TGCCGGGCCTGTTAAATTATTTAAATTTTTGAATTAATAAATTTAGGCCAGAAGTCGAGCTCGATCATTTT  
AAAAAGCATAGAAAAGGCTGGTATTAATAAAACATTCAAGAAACGGGACAGGTTGATCAGCTTTTATTT  
CAATACAATATTTAATGTTTTTGTCTTTTATAAAGATAGGCTGAAACAATTGTCAGTCTTAAAAATATTT  
TCTTCCAATATCTGAAAGTTACATAATTTTAATAATAGATAATTTTAAACAGTTAAGGTGTTTTATTAGA  
AACTGTTTTGAAAAAAAAGTTGAAACGTGTTAGTTAAGGCAGAGTAGAATGGAAGAAAATGTTATGGTTG  
TGAATATACTGACAAACCATGTTTATTTCGGAATTTATAGCGCGAAGTTTCACAATGGGCTTGAATTTTA  
GCGTTGTAAGTTCAAATGATACTCAACTATGAGACAGTGCATAATTTACTTTAAACTGCTCCGTTTTTTGA  
TATCAAACAATTCGTTTTATGTTTCGATTAATAGTACTGTAATTACGTTATAATTTCTACCAGAATAACT  
GACGAAATTTCTACAATAACAATTAATAATGATGAATGATAGTAACATAAGCAACAGATAAAAAAAA  
GGCTTCAGTGGTCACCTGGTCATCGGTCATCAGTTGGATACTGATGCTGCTAACAGTGTTATTGGCTTTTT  
ACGTTGTAGTATATCGACCTTGAAAATGACATATACACTTGATATGTGTTGAAACTAGAAGTTTTTATG  
AGATTACACATTTAACTAACCGGTGTATATTTAATTCATAGTTTTTAACCAATAAACTAACTGAGAATACA  
AATTGCTTTATCACATTTTATCAACAGCAAAAAAGTATTTTAAACATTTCTGTTCTGTCGGACACACT  
TCTCATGTTTCTCTTCCCTGTGAGATTCTTCTCGCTTTAAAATTTGGTTTTATAATTATTAGATAATTTCTA  
GTGTCCTCTCTTCACTGGTAGATTCTTCTCACTTTTATATTTGGTTTTATAATTATTAGATACTTCTAGTGT  
CTCTCTTCACTGTGAGTTTCTTCTAGTTTTTACATTTGGTTTTATAGTTATTAGATACTTCTAGTGTCTCT  
CTTCACTGTCACTTCTCTCGCTTTATATTTGGTTTTATAATTATTAGATACTTCTAGTGTCTCTCTTTAC  
TGTCAGATTCTTCTGCTTTTATATTTGGTTTTATAATTATTAGAACTTCTAGTGTCTCTCTTCACTGCC  
AGATTCTTCTCGCTTTTACATTTGGTTTTATAGTTATTAGGTACTTCTAGTGTCTCTCTTCACTGTGAGTT  
TCTTTTAGTTTTGCATTTGGTTTTATAGTTATTAGATACTTCTAGTGTCTCTCTTCACTGTGAGATTCTTC  
TCGCTTTTACATTTGGTTTTATAGTTATTAGATTCTTCTAGTGTACTCTTCACTGTGAGATTCTCTCGC  
TTTTACAATTGATTTATAGTTATCAGATACTTCTGGTGTCTCTCTTCACTGTGAGATTCTTCTCGCTTTT  
ACATTTGGTTTTATAATTATTACATACTTCTAATGTCTCTCTTCACTTAGATTCTTCTCTCGTTTTTG  
AATTTGGTTTTATAGTTATTAGATACTTCTAATGTCTCTCTTCACTTGAAGTTTCTTCTAGTTTTATACATT  
TGGTTTTATAGTTATTAGATACTAGAAGTATCTTCTTGATTTTACATTTGGTTTTATAATTACTAGTTTTTC  
TAGTGTCTCTCTTCACTGTGAGTTTCTTCTAGTTTTTACTTTTGATTTATATTTATTAGATACTTCTAGT  
GTCTCTCTTCACTCTTAGATACTTCTCGCTTTTACATTTGGTATATAGTCATTAGATACTTCTAGTGTCT  
CTCTTCACTTGAAGTTTCTTTTAGTTTTTGCAATTTGGTTTTATAGTTATTAGATACTTCTAGTGTCTCTCTT  
CACTGTTAGATTCTTCTCGCTTTTACATTTGGTTTTATAATTATTAGATACTTCTAGTGTCTCTCTTTACT  
GTCAGATTCTTCTCGCTTTTATATTTGGTTTTATAATTATTAGATACTTCTAGTGTCTCTCTTCACTGTCA  
TTCTTCTCGCTTTTATATTTGGTTTTATAATTATTAGATACTTCTAGTGTCTCTTTTACTGTTAGATTCT  
TGCTTTTATATTTGGTTTTATAATTATTAGAACTTCTAGTGTCTCTCTTCACTGCCAGATTCTTCTCGCA  
TTTACATTTGGTTTTATAGTTATTAGATACTTCTAGTGTCTCTCTTCACTGTGATTCTTCTCGCTTTTATA  
TTTGGTTTTATAATTATTAGATACTTCTAGTGTCTCTCTTACTGTGAGATTCTTCTGCTTTTATATTTG  
GTTTTATAATTATTAGAAACGTCTAGTGTCTCTCTTCACTGTGAGATTCTTCTCGCTTTTACATTTGGTTT  
ATAATTATTAGGTACTTCTAGTGTCTCTCTTCACTGTGAGTTTCTTCTAGTTTTTACATTTGGTTTTATAG  
TTATTAGATACTTCTAGTGTCTTCTTCACTGTGAGATTCTTTTCGCTTTTACATTTGGTTTTATAATTAT  
TAGGTACTTCTAGTGTCTTCTTCACTGTGAGTTTCTTTTAGTTTTGCATTTGGTTTTATAATTATTAGAT  
TATCTAGTGTACTCTTCAATGTGAGATTCTCCTCGCTTTTACAATTGATTTATAATTATTAGGTACCT  
CTAATGTTTCTCTTCACTGTGAGTTTCTTCTAGTTTTTACATTTGGTTTTATAGTTATTAGATACTTCTAG  
TGTCTTTCTTCACTGTGAGTTTCTTTTCGCTTTTACATTTGGTTTTATAATTATTAGGTACTTCTAGTGT  
TCTCTTCACTGTGAGTTTCTTTTAGTTTTGCATTTGGTTTTATAGTTATTAGATACTTCTAGTGTCTCTCT  
TCACTGTGAGATTCTTCTCGCTTTTACATTTGGTTTTATAGTTATTAGATTCTTCTAGTGTACTCTTCACT  
TGTCAGATTCTCCTCGCTTTTACAATTGATTTATAGTTATGAGATACGCTGGTGTCTCTTCACTGTG  
AGATTCTTCTCGCTTTTACATTTGGTTTTATAATTATTACATACTTCTAATGTCTCTATTACCCCTTATAT  
TCTTCTCCTAGTTTTTGCATTTGGTTTTATAGTTATTAGATACTTCTAGTATCTCTCTTCACTGTGAGTTTCTTCT  
CTTCTAGTTTTTGCATTTGGTTTTATAGTTATTAGATACTTCTAGTATCTCTCTTCACTGTGAGTTTCTTCTAGT  
TAGTTTTTGCATTTGGTTAATAGTTATTAGATACTTCTAGTATCTCTCTTCACTGTGAGTTTCTTCTAGT

TTTTGCATTTGGTTTATAGTTATTAGATACTTCTAGTGTCTTTCTTTACTGTCAGATTTTTTTTTGATTTT  
ACACTTGGTTTATAATTATTAGATACTTCTAGTATCTTTCTTTACTGTGAGTTTCTTCTAGTTTTFACAT  
TTGATTTTATATTTATTAGATACTTCTAGTGTCTCTCTTCACTGTCAATTCTTCTCGCTCTTACATTTGGTT  
TATAATTATTAGATACTTCAAGTGTCTCTCTTCACTGTCAAGTTCTTTTCCCGTTTATATTTGGTTTATA  
GTTATTAGATACTTCTAGTGTCTCTCTTCACTGTCAATTCTTCTCGCTTTTACATTTGGTTTATAGTTATT  
AGATACTTCTAGTGTCTCTCTTCACTCTTAGATACTTCTCGCTTTTACATTTGGTTTATAGTTATTAGAT  
ACTTCTAGTGTCTCTCTTCACTCTTAGATACTTCTCGCTTTTATATTTGGTTTATAGTTATTAGATACTT  
CTAGTGTCTCTCTTCACTCTCAGATACTTCTCGCTTTTACATTTGGTTTATAGTTATTAGATACTTCTAG  
TGTCTCTCTTCACTCTTAGATACTTCTCGCTTTTACATTTGGTATATAAATTATTAGATACTTCTAGTGTA  
TCTCTTCACTGTCAAGATACTTCTGTTTTCCGCTCTTCCATCAAAATCAGATACTTCTGATATAAAGTTGTA  
CACTGTCAAGATACTTCTGATATAGTTTGGTATTGCTGTCAAGATACTTCTGATATAGTTTGGTATTACTGT  
CAGATACTTCTGATATAGTTTGGTATCACTGTCAAGATACTTCTGATATAGTTTGGTATTACTGTCAAGATA  
CTTCTGATATAGTTTGGTATCACTGTTAGATGTTTCTGATATAGTTTGGTATTACTGTCAAGATACTTCTG  
ATATAGTTTGGTATTACTGTCAAGATACTCTGTTTTAGTGTGTTATCAACGTTGGTAAAAGAGTAGCTTA  
AGAGTTGATGGTGAGTGGTGATGAATAGCTGCCTTCCCTTAAGTTTACTTTGCTAAATTACGGATGGGT  
AGCGCAGATAAACCCTCGTGTAGCTTTGCGCGAATTTGAAATACAGATACGTAATTTATCAACGTCACATA  
CTTCTGATGTAGTTTGCATCAATGTCAAGATATAAAGAGTTTATTATTTTTAACAGGCATATTTGTGTTAA  
ACGTTTGGTTTCTAATAAGTTCTATGTGATAGTTGTGATTAGTTTGTACCAGTATGAGATATTTTTAA  
ATGAGCTTAGACATTTATCTTTCGCTCGATATACTTCTTGTTTTTACTACTGACTTGTATAAAGTTTCAACT  
AATCCTTATTTTATAAATTCGGTTCGCTACTACTGTCAAGATACTTCTATTAATTTTGTGTATTAACTCTGTT  
AGATGTTTTCTCGTTTACTTTTTATTTGTGTTTCCCGCTGGAACAGCGGTAAGTCTACGATTTTCAAAGCTA  
AAATCAGGGGTTTCGATTTCTGTTCGGTGGATACAGCAGATAGCCCGATACGGCTTTGCTATAAGGAAAAAC  
ATACACTTTTTATTTGTTGACTGTGTAATAATTAATGGTTTGTCTATCACTGTTAGATATCCATTACTCTC  
TGTCGATGTCTGGTGTAAGATATTCGTTTGATTTATTATAGATATCCATTACTCTCTGTGATGTCCGG  
TGTAAGATATTCGTTTGATTTATTATAGCGAGTGTGCTTCATATAGAAATAATACATAAAGCTTTATAA  
ATCCGTAGACTTACTCTGTCCCACTCTTCATAGTGCCAGTTACTTGTGAATTACTTTAATTTATTATT  
ATTGTCAAGAGATTCTAGTCTTATGTTTGATGTTGATGTCACTGCAGTTTTACTTTTTTATTGTTTGGATA  
TTTTTTCACTCTGAATTACTTCTTATTTTACATGTGGCTTATTGTTACTGTCAAGTTACTTCTAGTTTCAT  
TTTGTGTTGTTGTTTACTGTGATATCTTTGGATCTGATTTTCACTTCGTTTGTATTTTACTGTCAAGTTA  
CTTCTTGTGTTTACGTTTAAATACTCCCTTTACATTTTCTGTTATCTATATATTTATAGAACTTGCTAGTTT  
GTTATTTCCCTCTTTATTCATTCAATTAATTAAGTGGTTCTTTGTTGTGGATGCTTTCCGCAACAATCT  
GCAGTTTGTAAAACGTAAATCCTAAAGCAAAGTGCCTTATGAAGATTGGTAGTTTTTCCAGTGACAATG  
TCAATATTTCCACTGCAGACTCATCGCCACTACGTAAATTTCTCTATAACTAAACGAAGGAAAACATCTT  
TTTTTGCATATTATAGGTATGGCTAAGCTTGAATGTGATAACGTGATTACGCTTAGATATACGATACTCC  
CTCAATAAAACGTGATAAAATTTGACTTTGCGATTAGTTTAGATCAAATGCGGGTAAATAACATTTGTT  
AGGAGTGGACAATAGCTTTAGTGTGCGCACTCGTTTCAAAAAGTAAAAATCTATACTGTGATCCGAATA  
AAATCCTGTTTCCGTTTATTATATAACGTGAATGTGTGGTAGATACCATAACTGTGACATTTTCCCTGTGA  
AAAAACGGTCAATTGGTATTTGATCTACGCACTCATATCGGGTTCTTTTGGTGCGCAAAACAGTGTGTC  
CATTCGCAACCGTCTATAAAAACTATGGTTCCCGATGCTATTGCTTTATTGGCGCCCTTACTAAGACAGG  
AAAACATGAAAACAGCCTTGGCAAATTACATTAGTTCTTAATGAAAAGCCGAGGATGAATCTGTGAATT  
CTGTTCCCTGATTTTCTAAGTTCTAAAGTAATGTAACAGCGTATATAAAGTGTGTTGCTTGTGACTGTCTG  
GCGTCTCGTATACTTTATATAAATTACATTTTATAAGAAACAAACAAAACGCGCGTAGTCTTGATAAAG  
ATTTTTGTTTCATCTGTTGTTGGAATACTAGAGTGACATCACGTTGCCTGATTGGTCTGATATGAGTACGT  
TTTAAGGGCTTTTCTCAAGCCATACAGCATCAGAACTGAGGATGTATCGAATATCAGAAGGTATAAAAA  
TACATATTATTGAAGGAATTTATATCTTTTCTCAAAGTCAAAAAAATTTTTTCAAGTGTGTTGTTAAGCC  
TCGCGATCTACTCGTTAATTAATAATGCAATTATTTGTATTATCATATGCATATTATGTCTTATACTGG  
ATCAGCGAAAACCTTTCCATCTTACGAGGCTAAAGTTTGAAGTTGATTTATCCGGCCCGGCATGACCAGG  
TGGTTAAGGCGCTCGCTCCTAATCTAAGGGTGCAGGTTTGAATCCCGTCAACCAAAACATACTCGCC  
CTTTCAAGCGTGAGGACGTGATAATGTACAGTCAATCCCACTATTCTGTTAGTAAAATAGTAGCCCAAGAG

TTGACAATAGGTGGTGATGACTAGCTGCCTTCCCTTTAGTCTTACACTGCTAAATTAAGGATGGCTAACG  
CAGGTAGCCCTCATGTAGCTTTACGCGAAATTAAAAAAGAAACAAACAACTCAATTATTCACGGTTGACA  
AAGAGCAGATAGTCCTTTGTGTAGCTCTGCGTTAAAAACAAACACAAAAGCATATTTTGGCTATTTCTGTG  
TGATATAAACTTAGAGATCACGGACATGTGTTTTAGATGGGTTGTTTTAAGGAATATAAAATCAATTATT  
ACATTTTCAGAAAGTTGTTCTTTTCGTAATGAAACTGGAGGTAGAAAAATAAAGACGTGTGAACAACTCGAG  
CACCATGTGAACTAGAAACAAGGAGTTGTGGCAGAAAAAAATAGTGCCTTCGATAAAGGAATTCTCAA  
TAACCGCGGCACTTCAGACAGAATTAGAGTAAATTAATCTCTAACACTTTTTCTTAATTCCTATTTTTAG  
TAGCTATATTTTGTGCGCCAACAATACAAGTCGTGGGGCACGTGTACACTGGAACCGATTTTATTTATTC  
TCAGGATATTTACCAGGTTATCCTCAAGATGAAATTCTTTAAAGCAATATTAGAGTAATCTAATCTATGA  
AACTTTGGGCGTGTTTAAACACATCAATCGAATGGGTTTCATCTCCTGATTCCAAAACGTGAAATAGATC  
TGAAACCGGTTTCAGACTCGACGATGCTATGAGTTCAAAGTTTATACTTGAAAACAAACAAAGAGAATCTG  
AGCCGTTCAATGAGCCACTATGCCGCGACTAAAAATAGTGCCTTTTGTGGCGGCGTTTTCTAAATTTAA  
TTTTCAATTCTTTAAAAAGATTTTCTACGAGAATTCAACTCAACTATTCGTCTGCAAAGTTACTTCTTC  
TCCTGAGTGGTTAAGTTTCTCGTCGATAAAATACATTAGATTATCAGGGAAAGGCTTCCGTTTTTCATCG  
GTTTTCTTAGCTCATGTTTTGTATTGTTACTCGGGAAACTGAACTCCACTTACAAACAATAACGAAACG  
CTCAAACACATAAGCCTCCAGTTACCCCTAATCCCTCTCGAGTGGGACTTTTAAACGATCCAAAACGTCT  
TTAGACTCCAGGAAATCCAGTACGATTTTTCCAAGTCTATTCGGTAAACTTCAAACACGGCGCTGTGTTG  
TGATAAGAGGTATGAATTTAAGAAGGCAAAAACCTTGATCCTCCAACCTGATATTCGGTAGTGGTCTCAATC  
GGCTCGAGGAGGGCTCCTATCATGTAGCAGAAAGTTTGGGTAAATCTATTTAGCCTTGTTTGGTGACAAG  
AACGAACTTTTGTATCGGTTGGAGTACCTTATTAGCGTTGTGCGTCTCTAGCATGGTGACCAACGACGG  
CCTTGCTTCCAACAGTCCCACGTGAAATCCAGAATACTATAGAAGAATGCCTCTTAAGAAAAAGATATTT  
CTTTACACGGATCGCTTTGTGTAAGTCACTCGGGCAGGTTCTTCGGCTTTAGAGCGCATACACTGTGTTG  
CGATAAATGTATGGACTAGCATTAAAGCGCAGGTTGCAAAGACCTAAGGATGTAACAGTAGGCTTTGCTA  
AAGGCACGTGAAATAGCCGAACGACTATTGAATGTTCAACTATAGAGGGTGGGTACATTTTGCCAAAGGA  
GTTGAACAATAGACATTGAACGCCATGATACATTACAAGCCGGCTGACAACACCAACATTACCCTGTCTGT  
CGGATCCTCATTTTGCAAAAGAGACCACTGGTGGTGGTTTTGTGCTTCTTGCTACCATTCGCTATGCCTC  
TTTAACACGAGTCAATAGAGGTCACTACGTGTTCTTTCAACTCCCATACGGGAAAGCGAGACGATAGAAT  
ATTTAACCCCTCGATTGCAGGAGAGGCAAAATTTGTCACTTTATTCAACTTAACAACCTGAAAGAACATGAG  
ACTGGATGGTTGAGATTGAGAAAGTAATAGACGACCATATATTAAACTGCTCATTTTTCTTACAACCACT  
TTGTAGAAACACGCGGAAGTTGTCCAAAGAAAAATGGGGAACACGTTTATTACAAAACATTATTTGTGGAG  
AGATTTTGTGTAACCGTTATAACAAACGCATAAACATTAAACAGAGAAATCCAAAAACGTGGAACCTGAG  
TATAAAATGATCGAAGTTTTTGTAGTATTTTATTACTTTAATAAAATCTTAGTAAAAATAAAATGTTTA  
GAAAAACAACCTTTACATTCCAGGCGTTTTAATCAACGTTTCGCCTTTGCATCTTCCTTAGGTTAATAT  
ATACAACGTTTGATATTAGAATAGTCGTAAATTGTAAACTTGTGTTGTTGTTGTTGTTGTTGTTGTTGAAAT  
TTCGCACAAAGCTACTCGAGGGTTATCTGTGCTAGCCGTCCCTAATTTAGCAGTGTAAAGACTAGAGGGAA  
GGCAGCTAGTCATCACCAACCCACCGCAACTCTTGGGCTACTCTTTTACCAACGAATAGTGGGATTGACC  
GTCACATTATAACGCCCCCTACGGCTGAAAGGGCGAGCATGTTTGGCGCGACTGGGATGCGAACCCGCGAC  
CCTCAGATTACGAGTCGCACGCTTGGCCATGCCGGGCCAATTGTAAACTGCTTGTAAATGTTCCAATTCG  
CAACTCTGCTGTAATATGAGTTAAACAGCAGGAAAGTTATTATACTTATTTAGTTATTGATTCAATATTAC  
AGCATAGTTATATACTAACTATAGAATACTATACTAATATATTACATATAAACTATTTTATAACATATAAG  
AATAAAGATAACTATATGTTTTATGATTAGTTAAAAACATAGATCGAAAACAATAGCTGCTCAGAAACAA  
TAACAAGTGGAAGCAAAGAATAAACAGTTTGTAAATAGTATTAACCATAAACTGTAAGGTTGTATGATAC  
TCCAGAATACTCAAGTGTCAAACCTGAAAATAACAGCATATTGGTACGATGCGTTGTTTTATGATTGGTGG  
TTTAGTTACATATAACCAACCTTGTCTCTGTTCACTTTTTTTTTTTTTATGGGTATAACTTCCATATATTT  
TCTGTCTTTAAAAATCTTTGGCTATTTGTAGAAAAACCCAGATATTAAAGAGAGAAACAAATGTAAAGAA  
ATGCAAAATAAAAAAACCCTTATACATCAACTAAAACCAAAATTAATCTATATAAAGGAATACTTTTA  
TATCTATACTAATTAATAACCTAACATCCAACCTGTGACGCCCCCTACAATCTGGTACTCGTTTATACTCT  
CGTCTCTAAGACATGTATCCGACAACGGTCACTTGCAACTCTCTTTTTCTTTATCTGAAGATGACCTAG  
GAAGGTCGAAATGTTGTTCTCTCCTTATCAATAAGTGTGAACACCCATACCAGCCGTTCTGAGATACAAA

ACTTTAGATGGGTTTAGGTTTTCTGTGTTTGGGGTACCTTGTTTGCATAGGATAGACTACGTAGTCTATC  
AAATCATTTGTAATATATGTAGGAGAAAACCGGACGACCTGTTTACACGAGTATCTCAGAACACATCACTG  
TGTAAAATACAAATGATCAACACAAAACCGTTCCAGCTGAGCACACGGTACCCTAAACACAGAAAACCGA  
AACTCATTTAACTTTATCTTAAAAAAACCATAAATTTTAAAGAGATCAAATATGTGGAAGCTAAACTCA  
TTAACAAAAAATATCCAAAAATGAACAGAGATAATGAATAGGTGGTACATGTAACATATTATAGTCCACT  
ATATTTGTATATGTCATAAAATAGTTACATATGTAATACGTTAGTATAGCTATATAGTTAGTATTATAAC  
TGTGCTACAATATTAGAACAATAGTAAAACAATTACAATAATTTATATATTGCTAGACGCACGTTTCGGC  
AGATTGGAGATATAAAAAATTACAAACAGCTGTGTATATTAATCCTGAGGAGCCGTAAAGGCGAACCGTT  
AGCTAAAATAATATATATACTTGTACATCTGAAGTGTAGGGTTCGTTTTCTCCTAACCGTTTTTACTACA  
AATTGTGAAAGACAACAACATTTTGGATATAACGAAAACATAAGCGTTAAGATAACATATTCTAAATCAC  
CTTTTAAAGTATAGCCCCCTCTCCCATGTTACAGCGGCAGATATGTGGACTTACACTGTTAGATAACCTGC  
GGTGGGCAGAGCGTAGATAGTCCATTGGGTATTTTTGTGCTCAGTAACAAACAACAATTTCAAATATTGT  
GTTTTTTTATGAATAATTACATACATTCTTTTTACTTATTTATGGTTTCGATTAATTTACTGGCTGTTACT  
TCATTTTGCTTATAAGTAACGTGAACGAACGGAATGTTTTTCAATAAAGAACCTTTTCATTAGAACCGAA  
GACCCAGCTAATACCGTATCCATTGTTATGCAAATTTGCAAAATAGGATTTTTGTATTGGTTTTACAATG  
TTTTTTTTCTTTTTTATTTCGGGGAAAGAAAAACCATTGTTAATTCAAAAGAAGTCACTTCCGTGTTGCTTT  
AGAACCGCATTTTAATTGCAAATCTCCCGCTGCACAATTCCTCAAAAATTCAATATTTTCGTCAGCCTTC  
ACTGTACTACGCAGCGTTAGCACGCGAGCTCGAGCAAGCAGAGGAAGACTGCAAACGTTTCTAGACACG  
CTCAGTCAACAAAAGTGGAATCGACTTATGAGCGAGTACTCACACATGGAGACATCTACCTCCGAGGGA  
AAATTTGATCGGTGTATGAAATGGTAGGACTACTTTTAGTTCTTTTGGGATACAGATCTTTTGGTTCTGT  
TACGACAATTACGTTATACATCTGTTCTTTCTCTTCGTGTTTACAGATACGGTACAATTAAATCTGTTT  
GACTAGTCAAGTCAATTTGATTATCTATTTAATTTAGGTCACATACATGTGCTTCCATTTATTTGAAGGT  
TTGTTTTTAAACAAGCAGAAATTCGGTTAACAGTGAGAAACGAAGTGTAGTTACTACTACACCGTGCTTTTG  
TGTCGATTATAGTGAATTACGTGATTAAACACTGTCTCTCACATCGTTTGTGTTTGACGAGTTTGCAACC  
AATGAAATACGAACTGTGTCTTCGTTTGAAACAGGGAATAACTATAGTCATGTATATGAATCTGATTAT  
ACATTAGCTAAGTTATTGAGATTATTGTGGTGCATTTTATTTTATAAATTTTGTGTAGTTCTTTTATAT  
GACTCTTCCCCACGATGGCTTACAATGCTAAATCAGGTTTCGATCCCTGCAATGGGCATAACATTCTATA  
GCTTTACATTTATCTGTAAAAACAAACAAATAAACGTTTTTAAATCCAATCAAGTCACTTATGACAGCAGT  
AAAGAAAAAATCATTTTACCAGTGTATTTAATTACCTGTTCTTACGTTTCGGTTTTCCACATCATGTGCT  
TTTTTGGCGTCTACTAATTTGCTTTTTCTTTTATATTTTAACTAGTGGTGCATTTCTAGACTACTGAAAGA  
GATGCAAAGACTCATTCGTTTGGTGCGTCAGACGCAGACCCAGCATGGCCAGGTGGTTAGGGCACTCGGC  
TCGTAATCTGAGGGTGGTTGCAAGTTTGAATCCCCGTTTTAGCCGTGAGGGTGTATATAATGTCACGATCA  
ATCCCACTATTTCGTTGGTAAAAGAGTAGTTCAAGAGTTGGCGGTGGTGGTGATAAGTAGCTGACTTCCC  
TCTAATCTTACACTGATAAATTATGGAGGGCTAACGCAGATGGACCTCGTGTAGCTTTGCGCGAAATGA  
AAAACAAAACAAAACATCAGGCATTTCCAAAATTATACTGGATGTATTTGAACTAAATGCTAAAAACCTT  
GATGTGAAAAGATTTTAAACGTTTAAACGCGATGGAACATAATAATGTTCTTGTACATTTAGTTTCTACCT  
ATTGGCACTTTACGTGCAGTAGTTATTATTTAAATTAAATTATATTGTATAATACTTGTCACTTGTTTCG  
TAACGAAAAAGGGAGAAAGTTAAAGGATTATATAATATTATCATATAACAAAATATATGCTCCAGAAGATG  
TGTTTATATAATATTATCATATCACAGAATATATGCTCCAGAAGATATTGTTTATATAATATTATATAT  
CATAGAATATATGCTCCAGAAGATATGTGTTTATATAATATTATCATATCACAGAATATATGCTCCAGAA  
GCTATGTGTTTATATAATATTATCATATCACAGAATATATGCTACAGAAGATATGTGTTTATATAATATT  
ATCATATCACAGAATATATGCTCCAGACGCTGTGTGTTTGTAGTTTTCAAATCGGTGATTTTATTTCTTGT  
TTTTTCCAGGTTTCTCCATAAAATCGTGTTTTACGAAACCTCGCTGCACAAAAGAGCAACATGTACAAG  
CACAGGCACAAGATGCTGTCTATGATAAACTGCGCATGCTCAATGGACAAGGATGGCCTCGACCAAACCC  
TTGGTATCCAGCAAGTGCTACGTTTGGGGGTCTAACTCCCGCTTGTGTCCCTCCTCCAGTTACTGTCCCA  
GGTCTGTCCACCGAGAACCGGCCCAATTTCAGAAAAAAGGTAACACGTAGATTTATGTCCATTAGATGAAAA  
TACACTTCACGACAATGACTACTAATCGTTACCAGAATGATCCCTGAGCTTTACGACAGTGACTIONTAT  
AGTACGAATCGTTACCAGAATGATCCCTGAGCTTTACGACAGTNATATGCTCCAGAAGATATGTGTTTAT  
ATAATATTATCATATCACAGAATATATGCTCCAGAAGCTATGTGTTTATATAATATTATCATATCGCAGA

ATATATGCTACAGAAGATATGTGTTTATATAATATTATCATATCACAGAATATATGCTCCAGACGCTGTG  
TGTTTAGTTTTCAAATCGGTGATTTTATTTCTTTGTTTTTCCAGGTTTCCTCCATAAAATCGTGTTTAC  
GAAACCTCGCTGCACAAAAAGAGCAACATGTACAAGCACAGGCACAAGATGCTGTCTATGATAAACTGCG  
CATGCTCAATGGACAAGGATGGCCTCGACCAAACCTTGGTATCCAGCAAGTGCTACGTTTGGGGGTCTA  
ACTCCCGCTTGTGTCCCTCCTCCAGTTACTGTCCCAGGTCTGTCCACCGAGAACGGCCCAATTCAGAAAA  
AAGGTAACACGTAGATTTATGTCCATTAGATGAAAATACACTTCACGACAATGACTACTAATCGTTACCA  
GAATGATCCCTGAGCTTTACGACAGTGACTACTTATAGTACGAATCGTTACCAGAATGATCTCTGAGCTT  
TACGACAGTGGCTACTTATAGTACGAATCGTTACCAGAATGATCCCTGAGCTTTACGACAGTGACTACTT  
ATAGTACGAATCGTTACTAGAATGATCCCTGAGCTTTACGACAGTGGCTACTTATAGTACAAATCGTTAC  
CAGAATAATCCTTGAACCTACATACTCACATTATTATGACTTATATGTTAACTCTACATTCGGGCCACTGC  
ATGTTGAATCACGTTTTATTATTTCGGATGAAGATATGAATTCATAATTTCTAAACAATTATAATGGTATC  
GTCCGCTTTAACTGGGTACTTTAAACCAAGTAGTGAAGGGATTCCACAGTTAACACTTTGTAACAGTCTA  
AAATGAACATGCCGCTAAAATCAGGGTTTAAACAATAAGGAAGAAAACAGTTTATTACAAATCACACA  
CTTACAAATAAATTCACACAGTTAATAAAACAAATACCTAATATTAATAAAACAATGTATAAATGTTTATA  
AATTAATAAATAATGAAATCAGGAAGTAAAACTCAATCCCCTCTCTAAAAAATACAGCACGTGCAATATT  
CCAACAATATACTTAAACATCGATAACAATACCGAGTGACTGTCTCCTGACTCTCTCGTTCTCATAATGA  
AGCTGCTGGCCGTGTATTTATTTCACTCAGTAGGTACAGAAAGTGCATCTCATGTATTCTATAAATTTACAT  
AGTCTTCTGCTACATTAATAGTATTTCTATGTACCGCTAGGGAGGCTGGCGTCATTGTCTATCAAAAAAT  
GCATATTCATTTAAAAATTTAAATGCTTATTTAGAAAGGATGTGTGTTTGTGTGTGTTTTCGAATAGCAAA  
GCCACATCGGGCTATCTGCTGAGTTACCGTTTTAGAAAGGGAGTTAGAATTACAATGCAACTAAAAGGT  
CATAAATATACTAACTATATGAGGAAATAATATTTGAACAATGAGTGTAAATCCGGTTCTGCCACCTAGG  
GAAGTCGAACCTCCTGACCTCAGCAGTGTAATCCGAAGATTTACCTCTGTCCCACCAGGGGGCTGTTCGA  
TCTATAAACTCAACCATAATAATAAAACAAATATAATATGTTATTTTTTTTACAACGTGTGAAATAAACGT  
AAAATAATTATGAAAATAATTAAGGTAAACGTAAATTACGTAACCAGTGACCGATGTAATGTACAATCAT  
ATGAAAAAGTCAGGACACCCTATGAAAGCCTATGGATTTTTGTAAGATTTTTGGATATATAGATATTTAA  
TCTCAATATTTAAAATACTGAGAGATTATAAGAATATAACTAAACAATTAAACTGAAGAAAAGACTTTT  
CAAGATCTTATGTACATGTAAATCTACAAAAATGCATATTTCTAATTGAGGAAAAAGTTAGGACACTCTAC  
CCCCTAATAGCTAGTGTTACCCACTTTGGCTGAAATAACTGCAGTGAGACGTTCTTGTAGCCATCTACC  
AGTCTCTGACATCGGTCTGAAGAAAAGTTTGCCCCACTCCTCAATGCAAAATTTCTTTTATCTGTGCGATGT  
TTGAGGGGTTTTCTTGATGTACAGCTCGTTTTCAAGTCACCCACAGCATCTCAATAGGATTAAGATCCAG  
GCTTTTGGCTCGGCCATTTCAGGACTCTCCATTTCTTAGTTTTTCAGCCAATCCTTGGTGGATTTACTGTTA  
TATTTTGGGTTATGTGCTGTGTCAGGGTCCAGGTCCGCTTCAGCTTTACTTTTCTTACAGATGGTCTCA  
CATAATCCTCAAGCACCTTTGATACACAGTAGAATGCATGGTGGATTCTATGAATGTGAGCTGTCCAGG  
TCCTGCTGCAGCAGAGCAGCCCCAAACCATGACACTTCCACCTCCATTCTTCACAGATGGTATGAATGCT  
GTATTTGGTTTTCTGTTCTGGTGTCCAAATAATTCAATTTTGGACTTATCCGTCCAAAGAACATTATCCA  
GAAGTCCTGATCTTTGTCTACATTTCTTAGCAAACTTCAGTCTGGTCTTGATGCTTCTCTTAGAGAGC  
AAAGGTTTCTCCTTGACACCTCCCATGCAAGTTAACTTGTGCAGTCTCTTTCTGATTGTAGACACAT  
GCATTTTCACATCAACGGTAGCTAGAGCCTGCTGTAGGTCCCGTGATGACATGTTAGGGTGTGTTGGAGAC  
CTCTTTTAGCATCTTGCGGTCTCGGGGTGAACTAGCTTGACGACCAGATCTGGGCATGTTGGCAGTTGT  
TTTGAAAGACCTCCACTTGTAGACTATTTTCCGGACAGTGAAATGGCTGATTTCAAAATATTTTGGGATC  
TTTTTAAATCCATTACCAGACTCGTAAGCTGCTACAATTTTCTTTCTGAAGGCCTCAGACAGCTCTTTTG  
CTCTCACTATGGTGCTCACTCTCACTTCAACAGTCAGGAGCACACCAAATAAATGTCTGAGGTTTAAAT  
AGGGCAAGCCTCATGAAAATGCTGAGTAACGATCTTCTAATCATGTGCACCTGGTGTGATACACCCGTG  
TGTGAGTTGAGCTATTTAAGTGGAATAAATGTGGGAGTGTCTTAACTTTTCTCAGTTAGAATATGCA  
TTTTTGTAGAATGACATTTACAGAAGATCTTGAAAAGTCTTTTCTTCAGTTTTAATTGTTTAGTTATATT  
CCTATAATCTCTTAGTATTTTAAATATTGAGATTAAATATCTATATATCCAAGAATGTTACAAAAATACA  
TAGGCTTTTCATAGGGTGTCTTAACCTTTTTTCACATGACTGTATATAGTGCTTGTGTTGTAGATGTCCAATCT  
TTAGAAAGGGCATGATGTATTGTGCTACATTAATAAAGTGACTGAATCTTTAAACTATTTATGTAGT  
AAAAACAATTTCAATTGGTTAAACATTGAAAATCTTAAGTTCGGTTAAAAAACTTTGGAATTTTTATCTC

TTTTTTTCAATAACGCAGGACTGGCAAGTCTAACAAAGTGTTTGTCTAGTATAACGGTACTGTTAGGACC  
AATAATCAGTGATGACGANGTGACTGAATCTTTAAAACTATTTATTGTAGTAAAATACAATTTTCATTGGT  
TAAACATTGAAAACTCTAAGTTCGGTTAAAAAACTTTGGAATTTTTATCTCTTTTTTTTCAATAACGCAGG  
ACTGGCAAGTCTAACAAAGTGTTTGTCTAGTATAACGGTACTGTGAGGACCAGTTAACACTGACTGTTAG  
AGATGATGCTTACAGTGGGTTTCATATAAGGATAGGCTTGATATGCTAATCAATAATGATGAAATTATTA  
CTGAATACCATTTGTGACAACTTTTCAGGCATCCTATTCTGTGGAGAACTTTTGTGTTTCTGCCGCTAGT  
GAACTCCTGTAGCGCCTCCTACTGGCACAGAGGCATGTCTGCAGACTCAAACCTCTAAAATCCGGGTTT  
CGATATCCGTGGTTGGCAGAGTACAGACAGCCCATTGTGTAGCTTTGTGCTCACTTTTAAAGCGAACATAC  
TTCTGTAGTTTTGTTTTTACGATCGGCAGTTTTTTTTTACAACCATTTTTAGCCCTGACAGTGTTTGATCC  
AAAGAACTACGAATTGGTGAAATAATAAGTTACAATTCTGATGGCAAGTACAGTTTGTCTGGGTTCCAGGGA  
TCTTTTTTTGTCCGAAAGGAGCTAATGTGACCAAGTCTTTGGAAATGAGCTAATGTAATAAAGACTATGGA  
AAGGAGTTACTGTGAAACAGACTTTGGAAATGAGCTATTATATGAGTCTTTGAATATGAGATAATATAAC  
CCATTCTTTGGGGAGGGGAAGCTAATGTAATACAGACAACCTCAGTGTAAGAAAGAACTCAAGGGAAAGAA  
AAATGATACCTTTAAAACTCACTGTGATATAACTCATTAAAGCATTAAATACACCATGTTTCATGTTAACAAA  
TGGCACAAAGTGATGTGAATTACAAGGACTGCTATCTCTGTAGTCACTACGATCAAACAGTGTTCAAACC  
ACGTTGGTTCTTCAGGAATCACGTAAACATTCCCCACATTATAGAAACGGTATATACATAAACTTTTTT  
GTTTGTGTTGTAGTTAAGCACAAAAGTAAACAAAGAACCATCGGTGCTGTGTTTGCCACCGCGGGTGTA  
AAGCCTGTTTTTATCGCATAAGTATACAGTTATTGCTGTGCCATTGGCGAGATTACATGTGTGGAATCA  
TATATAGATGTATATAGGTGAAAAGTACAACATTTTTTATTTGTTTGTTCGTGATTAAGCATAAGACTATAC  
AATGAGTTATATGTACTGTGCTTACCACGGGGATCAAAACCCGATTTCTAGCGTTATAAGCCTTCAGACT  
TTCCCTGTGCCACTGGGTGTATGAATGTAGAGCAGGTGGGGATATGAAAGGCTATTGTGACAGGTCAAA  
ATGTATAAAACGATACGCAATCATATATAAGATGCATTTCTGTAAACAAGTATAATCTATATGATCAT  
ACATTATGTTTGGTGTTTAGTTTACACAACCACAGTGAATATATCACCAGTATTCAAATATCAGTGAGT  
TAATTCCTAGCTCTCCACATACACTGCCAAGTTACGGGTAAACATCTTCGATGTGTTTAAAAATCTTCA  
ACGGCCCTTACATGAGCTAGTTTCGACCTGAGTGTGTTGCCTGTTGTGTTTCAGGGCTGAATATAGTGTTT  
TTACGTAAGCTGAAATGTCATCTAATTAGGTGCCGTACAATGCATTGATTTGTTGACACTGACTTCTATG  
GAGATCTCATTGTTCCCTTTTACACCATGTCTCTGAGGATGTGTACGCATATATATATATATATATGTGT  
GTGTGTGCGTGCCTGTGTGCGCGAACTTATGCATATGCACGTGCATATAATAACTTCCCTATGCACACAA  
TGAACATAGATGTTTCATATTTTTTTTTTACTCTAACGTGTAGTGGAACGATAGTTACCATGACTGTTAG  
AGTATTTATTTCAGATCCTAAACTGATTTGTTTTCTTACGCGTAATTCATTGTTTAAAGAGCATTTTATTCC  
ACCCTGTTGGTCTTTAAATGATTGTACGTTGAAATAACAAAAGCTCCATATACACGTGGACGTGGATAAT  
TAGTTTTAAAAATAAGTAACAATAGCAGATGCTTTAGAAGAGAGAATTGATACCAACAGATAATTTTTTGT  
TATTTTAAATTTGTTAAGGGAATTAATATTTTGTGAATATATATGTTATAACAACGTTTCAATAGGATAAA  
AGCGTCGATTGTATACACGTTTTACCCGAGTTCAAACGTTATGGGATTTCTTTGTTGTCAAGCGCAAAAT  
TACCTAACGTGTGGGCTATCTCTATTGTGCACACCACAGGTATCGAAACCTGGTTTATAGTGTCATAAGC  
CCCTCTGAGCTACTGGTGAGAAGGCTACCTTACAGTGGAGTATTGATCTAAATTTTGAACATGGAAGAC  
GTGTATGGTGTGTTTAGTTTGTATGACGTACATAAGATATTCACGTTTCATGAACATATTGGTGCGTGAA  
CGTAAAGCTTTATAATTACATCAGATACGTTTCGTAGGGAAGTATGAACTGATCACATAGTTCTAGCAGG  
GCTCACGTAAGATGTACTAAGACGTACAAACTATATGTTGCCCTTTGCTGTGACATACACATCCTTACA  
CCGTTCCAAAATAAAAATAAAAAAACTTCCATCTATCATTTCTGTGCTATTTCTGGATTTACACGACTAA  
TGCTAATCTTGTAATCGAAATACTTTATTTGTTTGTGTTTGTGTTTAAATTTTCGCGCAGAGCTACGAAAGTGC  
TATCTGCGTTAGCCGTCCCTGATTTAGCAGTGTTAGACTAGAGAGAATGTAGCTAGTCATCACCCTCAC  
CGCCAACTTTTGGACTACTCTTTTACCAACGAATAGTGGGACTGACCGTCACATTATAATGCCCCACGG  
CTGAAAGGTCGAGTATGTTTGGTGTGATGGGGATTCAAACCCGCGACCCTCAGTTTACGAGTCGAACTCC  
TTAACACCTGGCCATGCTGGGCCATTAATCGAAATATATCTAAATGCCTTAATTCGCTAGAAAAATAT  
AAATGTGAAATGCTTAATATATTTACATGTACCTTTTCACTGACTGGTACTATTTTAAAGTAGATTATGT  
GAGCGTGTGTATATATATAATGCTCTTATCAGAGGCAGTGTAATATTCATTATGCTTGGTTTATCAAGTT  
ATCTCTTTTACCATAGGAGAGATTTTCTACATACTAAGCTATCAATACATTAACTATTGTTTTTTGTT  
TTGTTTTTTTAGAAACCTTCTCTACTAAAATAATGAAAATAAATGAGGTTATTATATCACTCTAAATAATT



TAGCATGTTAAACGTTAAATCTAAGCAATTTGACTTGCGAAATGTTAATCGAAGTAATTTAGTATATGAA  
ATGCTATTCTACGTAACCTAGCTTGTGAAATGTTATTTTTAAGTAATTTAGCTAATGAGATGCTATTTTA  
ACTGATTTAGTATGATAAATAATATTCTAATTAATTTATAAATATATAGCATGTGAAATGTTATCTAAGT  
TATTTGACCTGTGATATATTGTTCTAAGTAATTTAGCTTGTGAAATGTTATTCTATATAAATTGAAGTTGT  
GACGCACCTTAGTAAGTAATTTAGCCTTTCACATATTATTCTAAATAATTTAGCTTGATTTATCACCGTAA  
AAGAGTCTACATCTAGCTATAAAAGTGCAAAAAATGGCGCGTGAGAGGTGCTAAAATACATGTATTTAAG  
GTACAAGATAAAACAAGACAGGTCTCGCAAATTTCTCGTTACAGAAAAACGAGATAAAACGTTAAATGGAG  
CTGAAAATTTGATAACGAAAGACCATGATCCAGATGGCAAACGAACCATATTTGAAAGGCGTATGTACTT  
TGATGCAACTTTAATAAAAAAAACCAGCAATTTTCATTTAATATTGTCTGTAAGAATGAGTCAAGTGGAACC  
AGATAACTGGTTGCTTATTTCTGTTAATGAGGCAGTAAGATGTGTGGTATGAAAAGTATGTTAAAAAGAA  
AATTTATTTTAAGCAGTGTATTGTGGCCTGAAACATAGGTCTGTGTGTGGTATCCACTTCACTTAAAGAG  
AGAGCAACGCTCCTCTGTACTCCCTCTTCGAATGATTTTTATTGTGATTTTGTGTAGTCGTAAGACACAT  
TCTGAACCTTTATTAGTCGATAATAGTTATTTATCAAACATAATTGTTTTGTTTTTAAATCTTTATTTTAA  
ATTTGTCTTAGATGTTAAATTTCCCAATTTCTTGTGAATAAAAAATAATAATCAAACACTGTGCTTTAT  
AAGTAATCAAGTTCTGTTTGTGTAACGTGCGTTTAGTAAAGACAATGCATAATTTAATTAAGTTGTTTGT  
CGTTAAAACTTTTCATTTATCATCTTTACGCTATTTCTGGATTTACACGACCGATGCTAATCTTGTAATA  
GAAATATTTTATTTGTTTGTGTTTTAATTTTCGCGCAAAGCTACACGAGGGCTATCTGCGTTAGCCGT  
CCATAATTTAGCAGTGTA AAACTAGAGGGAAGGTAAC TAGCCATCAATATTC ACTACTA ACTCTTGGAAC  
TACTCTTTTATAAATCAATGAATAGTGGGATTGACTCTAACATTATAACGTTCCGCAGCTGAGAAGACGA  
CCATGTTTTAGTGTAACGGAGATTGCAACCTGCAACCGTCAGACTACGAGTCGAGCATCCTAATCACCTG  
GCCAATTTAATTA AAAATAATTTTGTAAACGTTATATAACCTTCAGGTTACACAGTACTATACATCCATCT  
TCTGGTGTGGAAGATGACAGAGATAGGTCTGTTCTCTTTGTTTTATATAATTGGTGTGTTGTGTATTATTA  
ATACAGAAGTCATAACGAAATACTTAAACCAACAATATTTAAATTCAACTAACTATTTCAGTTTTTCTA  
TCTTTTAAATTTATAGAACTCTCATTATGGTGCATCATTTTCTTTTATAAAATCGTTATTTGATCGAAG  
TCCGCTACCCGAGAAAGTATACATGTATAGAATATTCATGTTTATTTGAAGTTAATTTAAATGAACATTG  
TCATGGGCACAGTAGTAATCTATCATTAAATTTAAAGTACGGTCGTTACAACTACCTGAGCTGACGTAA  
AGAAGCTCCTAAAGGTACAATAAAAAATAACAATGAGAATTGAGAAGTGTTGAATGAAAAATATCTTATTT  
GTTTTATTTGTTCTGTTTCTATCAGGAAACAGAAGCGAGTTTCATGTTTTTAAGTTTGTTTTTCAAATCA  
TGCGTATTTTCGTTTCTAGACTTATTTACGTCAATTCTAATTGTTGTACTCAGAATTTTTTTCATAGAATAAT  
TTCTCCGTTCTAGTAGGTTTCTCAGCCTTAGAATTAATTGGCAGGCAAAATTAATGTTCTAAATTTATAA  
CCAAGACAGTAATGACATTTTGAAAGTTGTTGACAGGTTATTTAATTATACAAACCTTTTTTTGAACTTA  
TTTATCGAAGCTAATTTCTGTATAAAGGTATAGGTATTTGGCCAAGTGTTCAACTCGCAACTTTCGGGT  
ACGAATCTCCGTTCCACCAAACACACTCGCCTTTTTATCTGTGGGGCAGTTATAAAGTAACGGTCAATTA  
CACTATTCGTTGCTAAATGAGTAGTTCCCACGAGGTGGCGGTGAGTGTTGATGACTAGTTGCCTTCTCTG  
TAGCTCATCACTGCTAAATTTGTAATGACTAAAGTAGATTGCTCTCGAGTAGCTTTGCGCTAAATTTAAA  
GCACACCAAATACACCATACTGATATCTAGGTAATTACAAACAGGATATTTACTACAACAGTATCATCA  
ATGCTTACGAACCGGATAAAGAAGTTACATCCAAATAAATGCAAAATTTCCGTTCAATTGTAATTATTTAG  
ATATCAGTATGGTGATTTTTGGTGTGTGTTTAAATTTTGCGCAAAGCTACTCGAGAGCAATCTACGCTAG  
CCATCTTGTACGCGTTCGGATTATTTGCGAAGACGAAATTATTTTATGCTGTTTTTCGACTTCTCTCTCGC  
GCGTGTGTATTTATGCCATCATTCCTCATGTAATTGTTAGGCTTAAAAGCATGCTAATGTTGAAAAGTAC  
ATCCAGCATTGTTATGACAACTGTTTCTATGACATCCAGTTAATAAGCGGTTTTTAAATGCATTTAGGAA  
CTGACTGCAGCAAAACTTAGATTTCAAATCTGATTTTCCCTGCACACCTGTACCAAGTTCTGGACATGC  
TAGAGCTTCAGGGATTTAGTGTCAAATGATAGTGCTACTCTCTTACCACCACACTTTGCGGTGTCTTTG  
CTCAACCGTCACGCGCTGTCAACCAGAATATGTCAAACCTGGTGACCCCAAAGTTGGAGTCTTCACAGCGG  
CACCCTCACAGAGAGATGGAAGCCTCTGGGTGGGCCGAGTCTCTTGAATCTTTAAGACTTAAACCATCG  
CGTTCTTTTAGACCCGAACCCAGCATAGAATAACCTCAAACGACAGTTTCATTTTTATTTTCTGTAAATG  
TCTCTTTTGTTTGGAATCAAAAAGAAGAAAAACCAAAGCAAGTGAGAATTCTTACAGTCAACCACGGATT  
AAAAACAATGTTGGCAATCACCAGGTGTCCAGATGTGAGGGTGAGATGGAGAGAAGAAGAGGGGGTTAG  
GAAGGTATAACTGACACGTGAATGTTTCTTTCTATTTGTACGCATCAAAATTTTCTCAGGGTGAACCTCG

ATCAATAATTCAGTACTTAACCTTTGAGAAGGTTTCTGTGCTGATTTCGCAAAAAACACAGTGTGCTCGAGAGTT  
CATTTTATCTGAAGATATTACTTTTCCGTAATTACAAAAACATTGAAAAAAAGTCCATACAATAACGTAAAAA  
TGCAGTTTAACTGTAAAAAAAATAACAACAACAAGAAAAACAACACGGAATTTAACGAGGAAATTAACAGGT  
GTTTCTGATTTTATTATATTGTGAGTTTTTTTCTTTCTGAATTTAAGCGAATGCATTTATGAGCAGCTG  
TCACTGAAAAGATGCGGTTATCCTATTTACATGTTGGTAAAAAGAGTAGTCCAAAAGTTGGTGTTGATTG  
GTTGTTTTCTTCTAATTTATCACCAGGGCAGATGGCCTTCGAATAATTGTATGCGAAATTCAGCAATTA  
ACCTTATTGAAATCTTCGACAATTTAAATTGGCATGGATCCGATTTGATGATTTCAAGTTCATTTACGTT  
AAGATGTCCTTGAGTCAGAGATTTTACTAAACAATATTTGTTTCGCGTATTTCGTGATTGTGAATATTATTT  
TTGTTTCAGACTGAATTATTTGTTGTTGTTGTTGTTTTTTGTGCTTATAATAATAAAGTTAAATCTAGAT  
TATAATGGTAATCGAAAAGCAGATTTCTAAATTCGTTCTGCGATAGATATTACGAGACCTTTTTCTATAAAA  
GCGTGTAATTTCCACGCGTTTGTGTTGTATGGAAACATCTGAGACACCGTGTGAGATATGTACTCCAAAC  
TGAGGAAAAGTAATAGTTGTTGCTCTTCAAAGCATTCTAGGCGACATTTAAAGCCATAAGTATAGTAGTT  
ACTAGGTCTCGATCTTCAGGCAATCATCCATCTTGTGCTTACTCAGTGTTCCATTTGCTGGGCTTACTAT  
CCTATCCCTTGCCTTTATTGATCACTCTCCACCAATAGAAAAGTTAGAAGGAGGAGCACATGATAATATAA  
TCTGGCTGCACCTACTGGATTGATAAAAAACCAGCATATAGAGAGGAACATGCTTTAAAAAAATGATTTGA  
TTCACGATGTTAAGAAATATCTGTGAATGTGAGAAAATAGAAGCAAAAGCCTTGTTTATAGCTAAATATA  
TATCATACAGGCAAACTATATAAAACATCCAAAGCTTTGAAAACATAAAATTTAAACAAATATACGGATGT  
TTTGATGTGCCACCTGTTGTTTGATTTAGAAAATCGTTTTTAATTTGCAAGGAATTTTACAACCGTTTCATTC  
ATTTACACTGACATTATATTTATGAATGTAAAATAAGAGAAACAAAAACATTTAAATGCAGTATAATTTAT  
TGTTAACTTCAAGAATTTCTGACTTTTTTTCACATTACTTACTATAATTAATATCATCGCATTTTTTTATT  
GGCTTACAGATGCGTCGTTTAATTACCTTTACGTTATTTTACCATAGGAAACACAAATGTCAGCCTGCAC  
CAAGACCTAGCCATATTCACCTGCAATTACTCCAGACTAAGCGACTGTAATCAATAAATCGTTAATACGT  
CAGCTGATATTTTGATAAGGTTCAATTTATCCAACTGATTTCAAGTTAGCTCCAGCTGGATATTTGGATCA  
TTTTATTTGTCCAACTGATTTCAAGTTAGCTCCATCTGGATATTTTGATCAGTTTCATTTATCCAAAGTGA  
TTTCAATTTAGCTCCATCTAGATATTTTGATTACATGTATTGGTCCAACTGATTTCAAATTAGCTCCATC  
TAGATATTTTGATTACCTGTATTGGTCCAACTGATTTCAAATTAGCTCCATCTGGATATTTTTTGAGATTT  
CAGTGAAACGTATTATAACTAATACCATTTGTAAGACCTTCAGCTGATATCTAATAATCGAATTTCAATA  
CCTGTGGTGCGCATAGAGCAGATGGCCTACTATGGAACATATGTGATCAACAATAAACAATAAAACATTT  
ATGTTATAAATATTCAACCGACATTCAAAGTCACTGCATATCTTTAATCGCAAGATCTGACGGTCAGTCA  
GCAAGTGACAAGTGATTGCATTAAATACTATAATATTTAAATGGATATCAACTGTGAGTGAAGTAAAA  
CACTGAGTTTTGTAAATCAGAGATTGGCGCAGTGATTTATTTCATGAGAGACATTTTCTATTTTGACATTTA  
ATGGTATATATTACAATTTATAAAGTCACATTTCTTTCACTTCCACTTTTAGTTAAGAAATACAGATAATA  
TTAGATTTTACACTTAATTTTGCTTTAAAAAAGCAATTTTAAACGTGTCTTCAAAAACAGTTTTTTCATG  
TTAAACAACGAGCATAAAAACCTTTGTATTAAATAAAAAATTGTGAATTTTTTAATTTTTTGTATTTTTTTATA  
GACAATACAATTGATTTACGCTTTGCAACATCGAGTTTTTTTTCATGAATATTGCAATCAGCAATTGGCGC  
AGTGATTTTTTTCGTGAAAAAAAAAAACAAAGAAACCTATTTCGGCAATTCTTCAAGCAAGGAGCGACTGCGCT  
GTAGTGAATGAATATATTAAATTTTCCATTGCTATTATTAATATTAGCAAACCTGACGGATAATATGGAT  
AGTTAAATCGTTCTGAAGATTAAGTGAGGAGAAACGTTATTTTAGAGATTATGTTTTGTGTGTTGTTAA  
CGCGAAGCTACACAACGTGCTATTTGTGCTGTGCCCATAACTGGTGCTGGAAAACCGGTTTTTAGCGTTA  
TAAGACTTCAGACTAACCTTTAACCCTAATTAAGTGTGTGTGTTTGTGGGAGAGGCGTATACATTTTTTT  
AAAAAATGAATGAAACATTTCAAGTGGAGCCAGTTTAGAAATATATTGTTGATATAGCTTGTGACTTTT  
GAACTTTTGAGGTCAAATACGAATAGCTCATTCAAATAAATCGTGTTTTTGGATTTGTTTACTCAGACTA  
AACTGGTTAAGCTGCGATCCAGCTGGACTCTGGTGCTATCTAAGGATCAGATTATACATGTATTGTGTT  
CACGATTCGGTGCTAACTTAGTGAACCTTAAATCCTGGTAGGTTTTCAATCTATTATTTCAAAAAAACAA  
AAATCTTTAGTTTTTATATAATGTATTGTAATCTGATTGTTGTAATCTGATTCCGGCACTTTGTTGTTTT  
ATTTCTTATATGAGAGTAAACGAGAAAAACAAAAAACCCAAAAGAACAGAATTCTCGAGTTGAAAGTGG  
AAGCAAATTTATTAAAGGGTCTTGTTACATAGATTAGGTTTTATTTTCTTATTTTTTTGTTTTGTTTTAA  
TTCTCTCTGTAATAACGTGCAGGAGATTGCTCATTAGAGAAACCGTTCTGAGCTGGGTGTGCGCTATAA  
TAAACCTGATAATGTCAGTCCCTTAATGGAATTTATGAAAAACGACATTAGCACTTTAAACAAGGCCCTCG

AGTTGTACATCAACTAGTTAGTAGGAGGGCGTGAGACAGCGCACGTAATGGTCTTCATAAAATTTAAACAA  
TGTCGCAAACGTGTCAACTAGCGGACCAGTGTAGACCTATATCAGACTAGTGTGCTGAGGACAAGGCAAG  
CTCATAGGATATTTAAGAACTGATGATCATATAAGCTATATCTACTCGTGTACAGTTCTTTGTATTTCT  
TGCCAATGATAACGTTAAATACCATAACAGATACGTACGTAGTATGAATGGAAATGCAACGGAAAATGAC  
AACAGCAAAAGTAGTAATGACATGGCGTTTTTGATAAATGGGCTCTATCTTCCCTTACCGTTCTGCAAAAC  
CGTGAATATCAGTATGTAACTGGGAAGATTAGGCAACTTTCCAAGTTGAAGGCCAGTCCTTAGCTTTTC  
TTGTACATTTAGGTGCTGAAAGCTTTTGATGCGGTGACATTAATTTGATGAATTTTGCAAGCAGAACA  
GATATATTTAACTTATTGAGCCTAGATTAGAGAGCTGGATTTGAAAGGTATGATAATGAAATGATCAGTT  
ATTGTACTTTAAAGACGATTTTCAAAATGGCGGCTGAGCCTAACGACAGTTCTAGCTATGAAACATTTTC  
ACATAGTAACGCTTTTAGTTGCTAAACACAATGTGATTTTTTTATACGACATTGTTATTCTTTTTTATTTC  
TCTACGTGGCAGCTCACAACAGCTAACTCATTTCTAAAAATAAATAATTAACACGACATACTGTATAAAAA  
AATATTTCTAACCTCATTTACGACATCAGTGGAGCATGGCATAGGTAACCTCTACGGGAGGTTAGGCA  
TGGCCAGGTGGTTAAGGCACTCGACTCGTAATTTGAGGGTGCAGGGTTTGAATCCCCGTCCAACCAAATA  
TGCTTGCCATTTGAGCCGTGTGGGCGTTATAATGTACGGTCAATCCACTATTCTGTTGGTAAAAAGAGAA  
GCCCAAAGTTGGCGGTGGGTGGTGATGACTAGCTATCCTCTCTCTAGCCTTACACTGCTAAATTAGGGA  
CGGCTGGCGCAGATAGCCCTAGTGTAGCTTTGCGCGAAATTCAAAAACAAACAACTCTACGGAATTATA  
TATCATGGTAGGTTTTGTGCTCAGAACCTTTGCTCTTAAAGCAAATAATCTTACGTCAAACACGATTAA  
GCATTCAGTTAATAACGAACTTTCAATTAATCTCTTAATTAAACGTTTAAACGTATCCGTGTACAGACA  
CATATAAGAATTCATGATCCTATGAGTTTTTCGTAAATATTTTAAAAAAATCTATTACAGGCTAATACCT  
AAAATAATATTAAAAATATCAAAACCTACTTGTAGCTATATTTAATTGATGTTAAGTTCCAGTCAGTGGAA  
GCTTGGGAGAGATTAAAAATCTATAGATATTATTTACTGATAACAAAAAGTTTAAACCTCGATAAATCAA  
GTACATATTTGTATTTAAATAAGAAAACCTTATCACTGGAATAAATATATTATTTAAGATGGTTTGTTA  
GTACGGCAGTAAATAATTTTCTTGTAAGCCATATCCTATACAGGACTATCAAAGACGACCTACAAAACC  
AATCAATATAACGAACTGCTATTTAGAGCTAACGTATCCCTTCTCGACCCACAGTCAATGGCTCCTTCA  
GATGTCATGGAAGACAGCAGAAAAAATGATGGTTTAAATGGACTTCAGAGACATTGATTCTTGGGGTGCCG  
TTTGTGGCACCTCGCCCCGCTAGTTGATTCTTCAAGTGAAGTGAAGAGAACATTTTTAGATAAAAAGCCC  
TTTCATGGATGACTCCTGAATAAGAGTGGCCAGTGTTTTCTCAGACAGTTTCTACAACCTAGTATAAACTA  
CACCTAAATTTACGGGCAGCTACAATCTCTAAGTCCTTGAGTCACCTGATCTAACAACCATTATTAAAG  
ACAAGCTTGAACGTCGGTAATAAATTATCACTGAGGGTTTCAAAACATTGTATATCACACAACCAAGTTG  
ATGATTGATTCTATTATCCACTTTTTGAAAATCCCAAGATAATATTTCTTTGATACTTCACGTTTAAACAGC  
GTATCTAACGTAAGCAGAATTTACTTAAATAGTGTTAATAAGCTCAATCTCTATAAAATTAGGTTTGAT  
ATTCAAATTTTGCATCTCCCAGTAGCTCAGCTGGGGAAGTCTGAACTCTAAAAAACAGGTTTCGAGAC  
CCGTGGTGGGCACTGCAGAAATAGCCCGCTGTATCGTTTTCTATATAGCAGCAACAAATATACTTTGTT  
TAAACATTTGCTTTAATACAAAGCGTGTTACATTTGAGAGGCACTGATGTATAGATCATAAAACATATT  
TCTGTGTCCTTTATGTTTGTTCCTTATCTAACTACTCCTAGGTCGCTGAGCCAATTTCAACCAAACTCTGT  
GGGCTGATAGTTTAAAAAGGGAGTCAATAATCCTCTTAATCTCCATTTATTACTGTGATTAAACATCTAT  
TATTTTTTCATGTATGTTAACGTTAATTACATATATAGACGGCGTCACGTCAATTTCAAAAAATATTAAATT  
ATTTATAACACAACATACACAAAGTGGCGTTGTTAAGCACATAAATGTCTTATATATATAAAGAAAGCAC  
TCTCTGTGGAGCCCCCGCTAGTACAGCGGTATGACTCCGATTTACAACGCTAAAATCAGGGGTTTCGAT  
TCCCCCTCGGTTGGCTGAGCAGATAGCCTTATGTGGCTTTGCTATAAGAAAAACACACACACACACACA  
CACACACTCTGTGGAAGATCGCAATAAAAAAATGGCCGCCATTATTGCAGTAATACATAAACTAAGCAAA  
AGTTTCAACTCAAAAGCCACCATAAGACTCACATGAAGACTCCTTTCTGAGTTTTATCAACTTTTTACTT  
TAAGCCTTGACCTTTCAATTTTGTCTCTAAGGCACCTTATGCAGCCAATAATCGTCAATTAATTAATCAT  
GTGAAAGACTTTGGAAGGACGTAAGAGCTGATTACTGAAGGCGAGTAACAGAAAGCACCCCTACTGCCA  
CTACATCTTTGCTATCTCTACTTACAATGTTACCCTCACCATCGCATAGTAGCGTATACAATGTTTTAA  
GTTGGTTGGTTGGTTGGTTGGTTGGTTGGTTGGTTGGTTGGTTGGTTGGTTGGTTGGTTGGTTGGTTGGTT  
ACATAGAGTGTGTGTGTGTGTGTGTGTGTGTGTGTGTGTGTGTGTGTGTGTGTGTGTGTGTGTGTGTGT  
AATCGAGCCCCGATTTTAGCGTTGTAAATACATAGACCTACCGCTGTACTAGCAGGAGGCTGATACATA  
GAGAGATCTTAAAGTTTAAACAAAACCTTTTGTAATGTATTAAACGAATGCTTTAATAATATGTTACGTTA

AAATAAATCGTGTTTTAAAGTTTCATAAGCCGAACAAAGAACGGATATCTCAACTTGTAGAAAAATAAAGGA  
AGACGTTTGGATGGCACCTGAACCAATGTAAAAATAATTTCAGTTATCACACGATATTCGACACTAAGTAA  
AAACAAGTTGCATTTATAACAATACTTGTGAACCTATTGAATTAGCTATTTTCAATACTAGTTAAAGTTT  
TAGTAAAAATGGTCTGTACATAGCTTGCTTTAAACCAAACGTTGAAAGTATAAATATATATCGTAACGTAT  
ACTTAGCTATAGTCACAAACACTACTTAACACTGGAGTGAAATATATTATATACATATTCAGATTTTAAG  
TACACTCACAATCAGTACTTCACGTTGTACTAGAATCACGTATATTGTATATATTTTCTATGTCTTAGCA  
ATAGCCACGGTTAGTTCTTAACACTAGAGTGATGTATACTGTATAGTTTTTTCAGGTCTTAGCTACAGTGA  
CGGTACTTAACACTAGAGTCACGTGTTATGTATATATATACTTCAGGTTTTAGTTACAGTCACGATCAGT  
GTCTGCTGTAACTTTTTGTCTACACGAGAAACGTATATTAATTAGTGTAATAAACAATATATATGTCAAA  
TACATTGTATCTTTTATAACTAGTGCTAGTGACGAAGAGGCCTTATTTCTCTTGGGCCCGGCATGACCCGG  
TGTTTAGGACGCTCGGCTCACAACTAAGGGCCACAGGTTTCAATCCCCATCACACCCAACCTTCCTCGCC  
CTTTTAGTCGTGGGGGCGTTATAATGTTTCGGCCAATCGCACTATTCGTTGGTAGAAGAGTAGTCCAAGAG  
TTGGCGGTGGGGGTGATGACTAGCTGCCCTCCCTCTGATCTTACACTGTTAAATTAGGGACGGCTAGCA  
CAGATAGCTCTCGTGTAGCTTTGCGTAAAATTCAAAACGAACACGTCTGTTTTTATCAGTATCAACACTC  
TTCAGAGACTTGAACCTGACTGATTAGCCAAGCAGCGTCATCTCGTGCCCTGTAATCGAAATATTAAATA  
TTTATAATTTTTACAATCTATTTATTATTTTCTAACTAAAAAAGTTATATTTTTTTTTCGTTGGCGTAA  
TCCTTGTGAGAAAAACCTTAGGTATATTTCGAAAAACAACAACCTTTCATATATTCGTAGAATTGTTTT  
AATATTAANAATCTCACGAGAACCTCATGCTAGTTCTCGCGGTTACATCTACATTATTTAGTTTAAAGTA  
CATATAGCGATTGTTTGTGTTGAAGCGACAGTTAAAATCATTATAACAAAGTTTACCCCAACCTTGGCATT  
CAGTGCTAGAAAAATGAAAAATGAAAAATCAAAAACATCATTGTTTTTTGATAGAATAGTTAATTGGCTTAAA  
AAGCACTAAGAACTGCTATTTTTTAAACATGTTTACAAGCGAAGCTTGTTTTGTTTTGTTTGTGTTT  
TGGAATTTTACACAAAGCTACTCGAGGGCTATCTGTGCTAGCCGTCCCTAATTTAGCAGTGTAAGACTAG  
AAGGAAGGCAGCTAGTCATCACACCCACCGCCAACCTCTTGGGCTACTCTTTTACCAACGAAAAGTGGGA  
TTGATCGTAACATTATACGCTCCACGGCTGGGAGGGCGAGAATGTTTAGCGCGACGCGGGCGCGAACCC  
ACGGATTACGAGTCGCACGCTTACGCGCTTGGCCATGCTGGGCCACAAGCAAGGGATCTTACTCTAATG  
TGTTTTTTTTGTTAACACCAGAGGGCGATAGTGAACAGAAAGCTCCAGCCGAAGTGACCCTGGTGAAG  
CGGTGATGATGAAGAAAAATGCAGCAAGATTACGTCTGAAGAGAAAACTACAAAGAAACCGGACCTCTTTT  
ACTCCAGAACAATAGAAAGCGTTAGAAAAAGGCATGTAATAAATATGAAATCAATGGAAGCACAGCTCA  
TAAAAATAGTGGCGTCTTTAAAACTCGATTATGTATTGTCTCACAATTGCTGAATCTGTAAAGAAAAAGTA  
AACGTCAAAGAAGGAAAAAATTGCATTACGTTAAGTAACCTCGGTAATACTGCTTTAATTTAACGATATAAA  
TACGTGTCAAAAATCATTTTTTAAAGATTTTCGTTACAAAGTCTACTGTGTGACGTATCTTACTTCTGAAC  
TACAAGATAATTATATAATGGAGTTTCGTAACCTCGTGCCTTCTGCAGTATTATTCTTAACAATGGATCGA  
ACATCTATTTCTGTTTTTACTTTTTTCAGTAATTCGAACGAACCTATTACCCAGACGTTTTTCGCCCCGTGAAC  
GATTAGCATCAAAGATAGACTTACCAGAGGCTAGAATACAGTAAACAGCTGAACCTGTTGTTTATTGAA  
CACATGAGTAAATACATTTAATGAGTTTGTGGCTGAGAAATAAGAGAATTAAACATGTACTGAAATATTA  
GAATGTTTGGAAAAATGACACAACTTTATGAAGTCTCGTTTATTACAAGTACGTTTAATATTTATTTGGTGAC  
GATCGTTTGGTTGTTTGCATAGAAGCTCAAAGCTACACAATGTACTCTGCCACAAGAGGTATAAAAAACC  
CGTTTTCTAGCGATTTATAATGGTTACGGAGACTTAAGATATTACAATAGAAACACATCAGCCACGTCGA  
AAAGAGAACTTTTGATTAAAAATAATATATCTTTTTTAAATCCCTGTAAATACGTTTGAAAAGCACATGGAT  
CGAATCGATTTTTTTTTTAAATAAAAAATTTATTATACACAATAATCATAAAGTAACACCGTGCCTAGTCTCA  
AAAATACAACAAAGTACGGCGCGCATGGCCAGGTGGTTAAGGAACCTCGACTCGTGATCTCAGGGTCGCG  
GGTTCGAATTTCCCGTCGCACCAAACATGCTCGCAATTTTCAGCTGTGGGGGCGTTATAATGTTACGGTAAA  
TCCAATATTTCGTTGGTAAAAGAGAAGCCCAAGCGTTGGCAGTGGGTGGTGATGACTAACTGCCTTCCTT  
CTAGTGTTATATGTATATATATATATACACTGTTAAATTAGGAACGGCTAGCGCGGATGACCCTTGTTGA  
GCTTTGCGCGAAATTCAAAAATACAAACAAACAAACAGCCTTTTTTTTATTGTGTACAATAACTTTTTTCG  
ATATTTTATTGTATTTTTGAAATTAAGAGCCATCATATCTTTATGATTATTGTGTATAATAAATCGATGT  
GACACAAAACATGCTCATAAGCTGGAATAACGTTTCACTACTGAAGATGAAGCGGTAAAAAGGTCTCAT  
TGGATTGTTTGTAAATCTTTACATTTTAAATGTTTATTACCTTTGATAAATAGTTGTTGTTGTTTAAAAAA  
AACAATTTTGAATTGAGCATTTCAGTATTACAATTTGTTGTTTCAAAGGTTTGGTTTTTCCAACCGAAGAGC

CAAATGGAGACGAGAAGAAAACTACGGAATCAGAGACGAGCTGCCGAGCAAGCGGCCGCCGCTGTCAAC  
AACACACCAGGTCGCCTCCCTCTCAATTCAGGTTTTCCAAATTCCTTGTATCCCGGTATAGGACAACCAA  
TGGCTAGCATGGGGGATTCTTACAGGTGGGCCTACTAATAGATGCTAATATGTAACATTTTCTGATTTGT  
TGCTAATGAGATTAATTACTTTGGCGGGCAGGTTTAATTTTAAACCATAAAAGAGGCAAATATGCAAGAGA  
TTGTAGTGTAGAAATCCTTCTATCATAGTGTTTTTCTAGTCGAAAAGAATGCTATATAGTTTCTCTTCA  
GTATAAAGATTGAATAAATTAAGATGTAATGTTCTGATTGAGCTATTTTTAGCTGCGGCAAAACGGCTCA  
TAAAACGACTCTGAGTTGTTGTTGTTTTTAAAGTACAACTTTTAGCTCATAGCTATGTCATCTCTTGG  
TCGATTTGGGATCTAACTACACTTTTGGACTTAGGAGATCAAACCTTTTCAATTGATGCATTTTACCAAA  
GGTCTCAAAGATTAATTTACTCTAATCTTGTCTAAAAGAATTTCAACTTCAGGTTTGCTGATAGAGGTCC  
TGATGAGTAGTGTTTTGTTGTGTTTTGAAGTAAGCACAAAGCAACACAATGGGCTATCTGTGCTCTGC  
CCACCACGGGTATCGAAACCGGATTTTTAGCGTTGTAAGTCTGCAGACATATGGCTGAGCCACTGGGGGA  
CCCTGATGAGTAATAAAATCGAATATGCACGGCCCACTTGTATTTGCTGGCACACTAAAATCTAGCTA  
ATAAAAATGAGAAAAAAGTCTCATAGATGAATTTAACCTAATTTTGCCTAAAATAACCTTAACTGACGT  
GGCTATTGAGGATACCTCTTGTTCGCTATTATGTTTACGCTAACAGTGATTTTTTAATATTTACTTT  
TCTGTGAGATATACCAGCTCAGAAATTTCAAACATATGTAGAAATCTCATAAGAGGTTTCATACAATATGT  
TTCTTCCTCAGTTCTATTCTCCGATGTCCACTTACTCTATGCCGAACAATATGGCACCACCTCTCTC  
TTCAGCAGCAAGCGTCATCTTATTCTTGCATGTTACCACCAGGGAGCGCCAGAAGTTACGACCATCTCTC  
ACTAACTAGCTATAGTCGACCATCTTGTCTACCGCACAAACCATATGTAATGCAGCCCGTCAATGGTCAG  
TTTTCTACAGTCAACAATGGTGGTACTGGTTCTACAGGTAAATAATTATGTTTGTTCATAATGTTTGT  
TCCACTATTTTCTTAATGTATTATATTTCAGCGTATGTAAATATTTCCGGAACACCCAAAAGAACTATT  
GTGTTTCTAACAAATAAGTACCTATGTTTTATTAGAGAGATTAAGAAGGCAAGTAGCTATGTTAGTATAA  
GTATGAGGCCTGACATGGCCTGATGTATTTACCGAACCTGCTCGCTCAATTAGTCACGGGGGCATTAGAA  
TGTGACGGCTAGCCCTTGCCTAAATTTACGACAAATTTAACAGAAGAAAGTTATAACTTCGTTTCCAATG  
CAACATTCTGGATAATAATAACTTCTGAAAAGAATTTATGGACTTTATTGAAAGTGGAAGAGAACATTTT  
GAAATATTAACCTAAAGAACGTACTGAGAAAAAAGTAGTTCCACATTTTTTAAACTTTTTTTCATCCATTA  
GAAATTAACAAATAAATGACTCAGGTATACTTAAGTACATATAATCTAAAACAGAAACGCGTTTTGTATG  
AAAACGATTGTAGATTTGACGGCGCAACACGAGTTTCATATACTTAGTAAATTTAAATGTTGAACATTAT  
TTGAGAGCTTTTCTTCTTTTAGATAAAATGTAGATATTCGATGAACACTGAGTGTTAAGTTTTGTGCGCTT  
ATTAACCTTGTGTTACTTTTCAGATATTTCTAATTTTTACTAAGTTTTTGTAGAAAATATATTGTGATTGCTC  
GTTAAAACAATCAAATAAAATGCTTAGATTTCTGTTTCAAAAACATTAGGAAGCTTTATCTTAAAGTCAA  
GTGATCTTTGATTCCATCATAATGTTTACAAATATACAAATATTTAACACCTTAGCCAATGGTTCAAAAAC  
ACTCCTAAGAGAGCTAAACGACCACGAGTGATGAAGAGACTTTTAGAAGATCAGGTGATTTAACTGTAG  
AAGAAAGTTTAGAGGATTAAGTGACCAAGAGGGTTGAGTTTTTAAAATGTGGAACATTTTTTTTATCAGT  
ACATTCTTTAGGTCAATATTTCAAATGTTCTCTTCCACTTTCAATAAAGTCCCTAAATTTATTTTTCAGAA  
GTTCTTATTATCCAGAATGTTGCATCAGATTAAGTGACCAAGAGTGTTGAGGGGACTTTTAGGAGAATTA  
GATGATTTAAAGTGATAAAAGAAATTTCCAGAGATTTAGAATACCTAGAGTAATTAGGAATGTTTTAAAGA  
GAGAAGGTTAGTTGTCTCAATCTTTCTCCAAC TAGGGGCTGGCTATTTATAAATCCAAAATTTTATGGA  
CTGCTTTGTACAGTATTAATTTTTGAAAAATACTTTTATATTACATTATAAAACAACCTTACTTAAAGTCAC  
TACCTTTCAAAACACACGTTTTCTTCTTTTTTTTTTACTGTCTTGTGGACTGATTAATATCTTGCACTGA  
ACAGGTACTGTTCTATGGCAAGGTGATTAGGAAACACCGAGTTGGATGAAC TAGAGTGATGAGTGAATTT  
CTAAAGCATTAGGTGACCTAGTGATTTGGATATTCCTAGAAAATTAGGGGATCTTGAATTATGAAACG  
ATTTCTAGAGAGTTAGGTGACCAAGAGTGATTAGGATATTC AAGAAATTTAGGTGGCCTAGACTTATAA  
GGGAATTTCAAAGGAATTGAAGGATATAGTGTTCTTCAGATAGAGTATTAATAATTTACGGGAACAA  
TACTGTGAAAGAAGATATTTATGAGGTTATATTATAGTTTAAATATACGTCCATAAAAGGAATAATATAAG  
TATGTTTCTAACTAGTAGGTGGTGAATCAGATGTTGTGTTTTTTTTTATTTCTAACAGCAGTAATACTT  
TATAAAAGGTTAGATGAAACTTAGATCATCTTAATCAGAGAGATAATCCATAAAGGTTCCAGTAAAGTG  
GATTCGGTAAAATTAATGCTTTCTTTTACTTCTTGTGAAATGTTACTGCTTTTGTTTTTTCAAAGGAATT  
GTTTATTAAAAATATCTGCAAGTTTACGTTTTTAAAGAAACGAACTGCTTATAATAAATATGTTTGTGTAAT  
AACGATTTAGTTATTTTGTTTTTTATTAGTAAATAATCTTTATGCTGGTATATTAGGTTTTTGGCAGGTAAT

TATAACATTTACTTTCTGTTTAGTTATTTCGATTCAGATAACGTTTATTGTAAGAAATACACTGTTTGAAT  
TAAATTACTTTTCATCGTTATTGTCAAGGTTTGATATCACCGGGACTATCTGTCCCAGTTCAAGTGCCAG  
GACAACCAGCAGATTTGAATATGACTTCAGCCTACTGGCCGAGAATACAGTGA

---

CCATGGGAGCGTCAGAA  
GCACGTGTGGACAAAACAAAACAAAACAAACAAGAACTAGCTTTTGACGCTGACAACGTTTAA
