# Supplementary material for: Evolutionary Conservation and Diversification of Five Pax6 Homologs in the Horseshoe Crab Species Cluster
Source: MDPI journal article supplement (doi:10.3390/arthropoda2010007), 2024-03-04
Supplement: s1 [file s1]

[illegible]

TTATCTTCATTACGTTTCAATTACGTGTTTTTTTTATTATATTGCGTTATTTGAAATTCAAATTTGTGTTT  
TTACAATAACGACCGGAATTTTCTAATTACTTTTAAATTGCTTATTTTATATTTAATCAACACTGTGTTG  
ATCGTGTAATTTGGCGAGATTTATTCAAACCAAAACGTAGATCAAATGATTATCAACACGTAATTTATTT  
TACATAAATGGCTCTATATAATGTAATCTATTCTAATTAAATGCATAAATTATTTAAATTCAAAGTTAATT  
GTATGAAAAGTTCTTTAATAATCGGAATAATGAATGGCTGTATCAGTTCTGTTTTTTTAGTGGGATCATAA  
ATTATTTAAATTTACACGAGTCTGTATCACATTCTTCCTATGGTGTTATCACGTTTTTTTTAAATAATTAA  
CGGCATAAATTATGCAATTGTACGCTTTGCTGTTTAAAGCCTTTTTCTACTTAGCATCATAATAGTAAGAT  
ACTTTGCGTTATGGCTGTATAAGACACTTATCAACATAACAATAATATGCTTTATAACATGGTTGTATGA  
AACACTTCGCAACATAACAATAATATGCTTTCTAACTTTATAACATTATTGTGTGAGACCCCTTAGCAACA  
TAATAATAAAGTACTTTTATAACATGGCTATGTGAGACCCCTTAGCAACATAATAATAATATATACTTTC  
AAACATGGTTGTGTGCGGACACTTAGCAACACAACCATCTACTTCGAAATATGGTTGCAAGAGAGTTTTTT  
TTTGTTCTTCTAAATTAACAGATATCATATCCTTTGAATATATTTAAAAAATCCATGTTTTGGTGT  
GTTTTTTTCTACATAGCAACGTAATCACGCAGTTGCACTAATGGTACTAACATGTTATTTAATTTTTAAA  
TAAAAACCGCGATTTTATAGCTATTTTTATGCTTTTTATCAGTAGCTAACACTAATGTTGCCACC  
TCCTTAAATGAGATATACACTGTACAAGTGGAAGTCAAGTGATATAACATATTTTTATGCCGTTTT  
TTATCAGTAGCTAACACTAATATTGCCCATCTACTTAGATGAGATACACCCTGTAGAAGTGGAACTAGTT  
CAAGTGATATAACATTCAAAACTGTCTGTTTTATTTTTTAAATAATTGTCTGGATGACAAGCGG  
AACAGAAAAGTACTTTTCAAGTGTATGGCCGGTGGTTAGATATACTCTGCCAATCGTTGTCGCCACC  
AGGTGGTCTGTATCCGAGTGGTCCAATGAGAAGCGTTCTCTGTGAGGTACGATGTTTGGAAAAATATCAGA  
GAGGAGTGAGGAAAAAAATGTTACAAGTGTGTGACAGGCGAATCCAACCTGGTTTTACAAAGACTTGACA  
AGCAAAATGGCAGGCATGTGACAGAAGATTAGTGTCATCTTTTTAGCCAAGTAAACCATTATTATTTTTG  
TTTGAGTTTGGACACCGTTATTATATGCTTAGGACGACTGTGATTTCAGAGCTTGTGTGTTGTTCAAC  
CAATTATAAAAAATTCCTTTAGCTTTTTTCTTTTTATAGTCTCAGAGTGTTATTGGAAGATTATGATCAA  
ACATAATCTTAAATGTTCAAATTTTATCCCCAAATAAAAAACAAATCAAACCTAAAGACCGATCACAGTA  
CTCGAAAAATCTAAACATTTACTTATATACGTTTATTTTGCTTTTATCAGTACATTTAAATCTGCATGTTTT  
GAATTTTCGCTATCTGCGTATGAAATCTGTTTGTGTAATTTTTTACATAGCTACTCGAGGGCTGTCTGTGT  
TAGCTGCCCCTAATTTTGAAGTGATATGCTAACGCGAAGGTAGCTAGTCAACACCACCCACCCCAAACTC  
TTGGGCTACTCTTTATCAACGAATAGTAGGATTGACCGTCTCATTATAACGACCCACGAGCATGTCTGTG  
TGATAGGATTTCGCGAGTCATGTAACATAACCAAGAGGCTATGTAACCTGATACAGTTAGTTTATGACCGAT  
AAATAAATGTGTTCCGGAGTATCAAAGTCGTTTATAAATTTTTTCCAACCTGTTAGTCTTGAGTTCAGT  
ATAGACTCCAATGCGCGATCTTTAAAGCATTGTTCTATACTATACGTACACACCTCAACTAAATTCATAAA  
CGCATTTGATCTAAGATCATTGTGGGGTCTAAATTTTATTTCGTAACCTACCTGCCAATGACGAGGTTTGC  
AGAAAAGTTACATTGTTTTGGTTTATTTTTGTCTGTTTCTTACATTTTGAGCAAAGCTACTCTTAACTTA  
GAAGTAATATATAGATGGACGACAGGTAGCGAACACTACCTACCGCAACTCTTGAGATACCTTTCAAC  
AACGAAATGAGAGATTAACCATCACACTATAACGCTCCCACGGCTGAATAGGCGAATATGTTCCGGTGACG  
GGTTTTCGATCCCGTTTCTTGTTTTAGTTGATACACCATTTTTTGGAGAGAAGATCAAGATCGATTGGTCA  
AGTTTATCAAGAAGATCAAGTAACAGTTTTCAAGTAAATGTGAAATCTAAATTATCAAAGGCAATCTTCA  
TAAGCAAAAAGCTTACCAATGGACTATCTGTGCCCTGTCCACCACATGTATCGAAACCCGGTTTTCAGCA  
TTGTAAGTCCACAGACATACCGCTATGCCACAGGGGGAGAGCATAAATGTGGTTATGTGAAATACTATTT  
TGTAAGTACGATATAGTATATCAGTTTAGGCTTAACTTAAACTATTTACTTTAATTTAGCTTAAATATATGT  
AGTTATATGTTAGCTTTGATTAACTAGCTATGTTAATCAAATACTATTTTGTACTGACGTATGGTGATC  
GTTTAGGCTTAGCTTAAATTTACTCGTAATCTGGTCTGAGTTTATGAGGTGTTAATATAGGGGCTAGGT  
TGCTCATCAAATGAATATAAATTCGTTTACTGCAGATTTAATCTCATATCACTGATTTGCATTACAAGTTA  
TGTTATTATCGTAAATTTATCCTCATTTAACTCCGCTGCCAAGGAGATATTAGTAACTAACTAAGCCTCA  
TGTTTCGAAGTTTCGGTCATAATTAGTCAGAGTTTTAACGTTGTTGTACATACAAATTACTACATGTTTTTC  
ACAATTTGTATAATAATTTTATTCCACCGTATGAAAAACAAACACACAGCTATGTCTTGTCTTATAGCAA  
GATATTATGAAAAACATATGTCTGTCCGTGGGGTTGCACTTAGTTGGGCCAATTTTTTCTCATGGTCA  
ACTTTACGTAGCTTTATCCAGGGTACGGCCATTGATTGGTTAAAAAGGTATATCCCCGAAGGTGCAAAAT  
ATTGACAAATGATATATACAAGGAAGTTCTATGAACAAGTTTTTCTAATATGAATTCGATAGCTTTTAGT  
TTTTAAACCGTGGTTTGAATAACTCAACTATATAAATTTTGTGTAATTTTCGACACGTTCTCAAGCAGAA  
TAACAATTGTTTGGAAAAACGGATGTTTGTGAGTCCATTGTTTATGAATATAAAGAAGAAGAGAAAAATTA  
AAATACGCTAAAAACAATTATATGGTAAACTAGCCGCGAACCTCAAACATTTGCAGTAGTTTCCGTGCC  
TTTCGCTCGAATTTTCTTATTTCTTTTCACTGACGCTATTTAAGCTACGCTTTCTTGACAGGCATG  
ATATGTTATATCGATAAGTCTAGTCTACTTGAATTTTTTACGCGTTTATGCAACAACTACATAG  
ACATAACTGTATTTGATAAACTACACAAAAATTAAGAGTAACATATAGTAATAGTATTTATAATAGTG  
TACAGAGTATGAAACAGTTATGAGTGTTGAGTGATGACAGGTTTTAAGAGTTTAAACAAATAATTAAAC  
TCGTAATAAAGAAAAAATAGCTAAAAGATGTTTATAGCAGTCTATGAAACGAACCGAAGCTAAATATTG  
CAAAGTAAGATAAAGGTAAAGTTTTTAATGAAGGCAAACTTAGCTGGATATGCAGAACTTCTGAATGCGT

GTTCACAACTTGATAAGCATGTGGTTTTTTGAACGAACTGCGCATGCGTGTAGCGTTTTAATTGACAAATTT  
GCGAGAAAAGATCCGGACAGAAAAACGCAAGCATATTATTTATATAGATAGGTGTAAGACCTATTTAGAG  
CGACTCTTAAAGGTGCATGTTTTATTTTTTTGTGTATTTGTTGTTAAAAATTCAACAAAAAACTTTTTATAC  
TGTAAGTATTTTAAATGATTTTTTAAAGGTTATTTTTTCAGAGTATTGTTTTATGTCATTTTTATGTTAATAAA  
AATATTTTTAAATTTTTTATATTTTTAAAGGCAGTGCAATAAACATGTTTTGAATATGTTTTTGTCTTTATTTG  
AGTCCCGAATGGATTTTCTGTGTAATTTTCTAAAACTTTTTTTATGGCCAGGTGGTTAAGGCACCTCGACT  
CGCAATCTGAGGGTTCGCGGGTTTGAATCCCTTTCACACCAAAACATGCTCACCCTTTTCAGCCGTGGGGGCG  
TTATAATGTGACGGTCAATCCCACTATTCTGTTGGTAAAAGAGTAGCCCAAGAGTTGGCGGTGGGTGGTGA  
TGACTAGCTGCCCTCCCTCTAGTCTTTCACTGCTAAATTAGGGACTGCTAGCGCAGATAGCCCTTGTGTA  
GTTTGC CGGAATTCAAAAACAAACAAAAACAAAGAAGTTCTGAGAATTGTATTAACAAGTACAGAACT  
TGGACGACTCATTTAAACTTTTTGGATGTGGGGTGGGTACTCACAGAATAAACACTGCCGGAGATGGTTTTT  
TAGTTTTTAAAGAACTTTTTATAAAAAATCATATCTTAATTGGCCAAATATTAATTTTTGCATGGTTAGAAA  
GGAATGCGAATTGAGTGAATACTAGTATGTATATATATATTTATATACATTTTATATGTATTGAAATGTC  
ACTTATAGTCTTTATATACCAGCATATTTGACAAAAATCTAAAGCATTTTTAATAATTACATCTAGTTTTTC  
TTCAATCAATAGAGTTTTAAGGAACCTTTTCGGCTCAGAAGGACCATCACCAATCTTCTCCTCAAGTTCCCT  
ATGACTGGGCCAGAGTCGGTTTTACGACAAATTACGGATGTTAAACGGTGCCCGAGCCGTGGCCATGGTACC  
CAACAGGCACATCTCATCATTTTTACGGCGTACCTCCGCCCTCATCACCGGTTACGTTGGGTCCCCAATAC  
CGGACTCGCGCGATCTGTGTCCAATCGTAAACGGTCCAGTCTAGGCTCATGTGACAGCATCTAGTTTTTC  
GATCACATGAGTGTACACCAAGAAAGGTGAGTCTTAGTATTCTGGTGTATATTATATGCACGACCTTGAGTG  
GTACTCTAATATTTTTGCCAGTCCCGGGATCGAATCCGGTACCTCTTTACAATTTAAGCTAAAGGATTAAC  
CCCTATATGTTATTAGTAATGCACTTAAACAATTCATATTACCGAATCAGCAAGTATCCAACCATGGAAT  
AACCAGGAAAGTATATCTTTAACTTATTTTGTGTGCTTCTCAATTAGACGCACATATTAGTTAAAGTGT  
AAAGCAATTAGTAAATAAAATTTTTGATAAGTAAGCTTGTGGCAGGAAACCAATAGGTAACATAACATGCT  
GCAGTCGTATTTACTTTAAACGAATTTCTGATCGTGATAAACATGGTGAATAACAGGTTATGCATGTTTT  
CTAGACTATATGCTAAAAATGACTTATGCATGGTCAATAAAGCTAAACAGTTTGTAGTAAACGTACGTAT  
AACCAGCAATTGTACAACGTGTTTATGGCCGATGTCTAAATGGAGCAAGTAGCGTTGCGTGAAGTTTGGTCT  
ACCTTCCAGGTTTTATCGGAATTATTAAGAACTAATTATATTTATCAAACTAAAATACTAGTAATGTTA  
TTAAATACATTGACGAAGATAACTGCGTACATCAATATATCAAAAGATTATAAACTATAAAGTTTAAAT  
TACATTAACCTTGATCAGCTGGTGGATACTTTGCGTGAAAACGATAAGTTTCGACCCTAATTTTTAACAGTA  
AATCAATCTTTATAAGTGCAACAATAATTGAAAATGCTTTACACACGTGATAAATAACAAGATTTAATGA  
AACTAACTATAAAGATGTTATGTTAAACACCCCCAGTTTTAGTTTTCTTCTTACCACGTTAGTCTAACATGG  
CCGGATGGCTGGGGCACTCGACTCGCAATCTTAGTGTGCGGGTCCGAATCCCGTCACCGAACATAATTT  
TGTACATAAATGTTTTACGATAGATTTTAAATCAACGTATCCACAGTTTTAAATAAAATTGTTAACGACTT  
CTCGATGTTTTTATCATAGAATACGAAATAAACGTATATACCTTAGTAAGTGTCCCTCGATGGGACAGTGG  
TAAGTCTACAGATTTACAACACTAAAATCCGGGTTTTGATTTATCTCGCGGTGGACATAGCAGATAGCCC  
ACTGTGGCTTTACAAAAACAAACAAACGAACCTTAGTAAGTATGAAATTTGTTTTGTTTTGTTTTGTTA  
TGTTACATAAATGTTTTACGATAGATTTTAAATCAACGTATCCACAGTTTTAAATAAAATTGTTAACGACTT  
ATAAGCTTTTACAGCTTACCGGTGAGCCAATAGGAGGGCAACAATAAAAGTACATATCACGGACTTTTTTTT  
AAAATCCTACTTTCTTTGAACATGTTTCACTCAGTAATTTCTCTGAACCGAATGCTACGCCTATGTCTAT  
TTTTTTGTGACGCCTTCCAAATCTGACCAAAACAGAAATGGATCTAATGAGCCGGTGGTGTCTACCAAA  
CGGGGATTTCTAAAGAAACGATTACACCTTCTGTTCTTCTTCTTCTGCGCTCTAGCGTCTAGCGTGTGT  
TCAGCGGAGAAATATGAGCTGGCTTGTACATACGATTCTTCCGCTATGCTACGATGCCCTAAAAGTCATTAC  
GAAACCTTCCATCTTCTGAAGTCTTAGGCTGGTAATGCTTCTGCTTTTTATTTGGGAACAATCAGAGGGTT  
GTTCTTAGACGCCGATTTCTCCGACCCGGTAAAGTTTTGGATAAAGAATGGTTCAAACCTTTATTTTTCT  
TCTTCTTTTTGCGCTAGGATGGTAGAGGAGTGAAGGGGAGGGTGTACGTTGCGAATTCAGATGCTGCTG  
TGATTTCTGTGAATAGATCGCTCGATTGTTTGTGTGTGTGTATGTGTGTGTCTGATCGGTGATGTTTGTAA  
AGAGCTTACACCACTCAGCTTCTGATTTAGCGGTCTCGTAGCCAGCAATATCCAAATAAGCTCCTTCTG  
AAGGGAATATTTCCGCACCCCTAACCTCATCTACTTGCCGGTTTTCGTAAGAGGAATCAGAACAGAAATAAA  
GGCGGTTCCTTCTGACGATTTTTCTTGACCTGGAATCTGGATCTCCATAATTTTTCTGGCTGATTTTCT  
GCCTAAATCAGTCTTTCTATTCCATGCTTTGTTGTTGTTGTTGTTGTTGTTGTTGTTGTTGTTGTTGTT  
TTATGTGAAAAATCTCTCAACTTGGAGGATGGGTGAGTTAGCACTGGCGTCACTCCATCTACAATATGACT  
TTATTAGTCGCTGGTTGTAGTACAGTAAGTGAACACCCTAATTCATTGAAGTAAATAAAATTTCTATTTTA  
AAGAAAAATCTCTACAAACAGTCTCTGTTGTTTAGGATATATAACCCACCGGAAGAGTAGTTATAATCT  
CTTCTTTCTATGGACACAAATTGCACAAAAAGTGGCCTGTAAGTTTCTTAGGTTTTTGTGTAAAGCTTA  
AAAAGAAAAGAGATTATCTAAAAACGAGTAATGTTGTTTCAATTTTACCTATTGTGTTTTGAAGTTTGTCTA  
CATATTTTATCAATTCAACTACTCATACTTTTCTATGTCTAGTGAAGGCTATGGACATTTGTAAATAACATC  
ACCCAAATATATGTACAAAGTAAACAAAGGAACAACCTGGTAAACACGACCCGGAAGAGGGCTTAGTGCTTA  
AGTCCATACAGAATGTTTTCCATTAGACCTAATGGTGTACAATTCTTTTATAAGTGTTTTTTGTGTGTGTG  
TGTGTGAAAAATAAATAAAAAAGTGTTTACAGTTTTCTGAACAAAATCTTTGAAATCAGTTTTATGTACGTTA  
ACATGCATTCGGCTCTAGATAAAAAATAATAATAAATAAAGCAAGAGATATTTAAGTGACAGCTGTA  
TTTTCATATAAGTCTGAAATATAGATATATTTTAAATCAGAGGAGCCCCACAGTGCGCATGTTGTTAGG  
CTGCGGACTTACAAAGATAGAAAAACAGGGTTTTGCTACCCGTAGTGGGAAGAGCACAGATAGCTCATTGT  
GTAGCTTTGCGCTTAAACACAAAGAAACAAAAATTAGAGCACAGATAGCCCATTTGTGCAGCTTTGCGTTTT  
AATTACAAAGAAACAAAAATTAGAGCACAGATAGCCCATTTGTGCAGCTTTGCACTTAATTACAAACAAA  
CAAAAAATTCAGAGCACAGATAGCCCATTTGTGCAGCTTTGCGTTTTAATTACAAACAAACAAAAATTAGAG  
CACAGATAGCCCATCGTGCAGCTTTGCGTTTTAATTACAAAGCAAAACAAAAATTAGAGCACGGATAGCCCA  
TTGTGCAGCTTTGCGCTTAAATTACAAACAAACAAAAATTAGAGCACAGATAGCTCATTGTGCAGCTTTG  
CGTTTTAATTACAAACAAACAAAAATTAGAGAAGTGTAGGATATTTCAATCAACATCAACGTTTGTAGC  
AAGGAACCTACCTACGCTGCAATTTTTAATACACTTAATTAATTTCTTGAAAACATTTTAACTACCTTAATA

ATCAACCGATGAACGATGAAATTCATGAATATATTCTTTATTTCGGATTTTATTATATGACAAACCTAA  
 GTTTTTTGAATAACAAAGTTTGGTTTGTGTTTGCATTTTCGCGCTAGCCGTCCTTAATTTAGCAGTGAAATNN  
 NNNNNNNNNNNNNNNNNNNNNNNNNNNNNNNNNNNNNNNNNNNNNNNNNNNNNNNNNNNNNNNNNNNNNNN  
 AGGATGAGCATGTTTGGTAGGATGGTTATTAGAACCCGTGACCCCTCAGATTGCGACCCCAAGCGCCTAAC  
 TATTTGGCTATGCCGGGCTTAATAACGAAGCTGGCTTCTGAAAAACAGAATTATATACGTACAGTATGTT  
 AGCAAGAGTTACTACTATCTCTCAAAAAATTGTTGGTCTTTTGACATCTAGTATTACAGTCTCAGGCTAT  
 GGTAGATTGATGATGATTTCTATCTCTGTTTATAAACCAAGAAATGTATAAAAAAGAAATTTTAAAAAT  
 ATAAATTGGTACGTTAAATTTCAATTTGCTGTAGGAAACATTTTGTACAGCTAAACAATGTGACACAAGATG  
 TGTGCAAGACACACACTACCGCATGCAAGCATGCCATTTCTATATGGTATGGGGCATACCCCCACCCC  
 CCATCCCAGAAAAATTTTAAAAATTTAATGTTATGAGATTGAGTCAAAATCTGCATACACATAACGTAAC  
 GTATTGAATTAAGAAAGCAAGTTTAAATGCTTAACTTTGATGCTATACATGCCAGGAAATGTGGTCAGG  
 CCATAACCACTTTCTACGGCCCTGCATTTGGTATAAAACACTTTACAAAAAAGCAACTATCGGGGAAAT  
 TGAATGAGAACAGATATTAAGGTAGGAAGTTTATGAAAAACATTCTTAAGTAAAAGTACTGCGATATAT  
 TATGAAAAATAATCTTGTTTATCATTTCACTATATTACTATAATACATCGAAGAAAATATATTTATTTTGA  
 TTGTAAACCGCTAATAGTACCCAGCCCAACTTTTGGGCTACTACTTAATAAGGAATAGATTGACTGTCA  
 TATTATAACGCTCCTAGAGCTGAAAAAAGGGGGGTATGTTTCGGCACCGGATTTCAATTCAATTTCAGAG  
 TCATAATAATTTAGCCACAAATGTATATCAGTAGCTGATCTAGAATATTTTTCTTTGGCGGGAGGAGTGG  
 TGGCTGTCCTCAAGAACTATTTTCAGATGTTTTCAGGAACATAAGTTACTTTTCGAAACATGAAAAATTTGA  
 TCAGGGGCTTTTAAAGTTACTAAACAGAGTCAAAATGAGCGGGCCATTGTTCTCATCCAGGAGGGGT  
 CCAGATATTTCTTCAGTTATTGATTTTGTGATTGGTGAGCCCCGAAAGATGCCCCCTATATTAATAAAT  
 AATATAATTTTAACTCAAACAAAAAGCATGTTTATGTTTCTTAATGAAGTGTGGCTTACTGCTTTAAACC  
 TAATCTATCTATGCTAGTTCATTGATGTTTATTATGTAATAAATATTTGTCAGCTATGTACGCAGGGG  
 AGAGGGGTCCACCGCATCCCATATTTTGTGATGGGAAAAAATAATCTCATTAAAGTTCATTTTATAT  
 GAACGTTTCGGTATCTGCTCTCCGTTGGTTGAATAATTACCTGAGGTGTACACAAACAGAAGAAAGACTGA  
 GTGCTCTAGCTTTAATACATAATCCTTATGACACTATCAACATTGAAACTGTATCTAAGTTATTTATGGA  
 AATGCACTCCAGAAGAAATGCTAACATGTTATTTTCAGTAGTCATACGTACGTATGATAGTCAATGA  
 TTGAAATAGCTAATAATACGATTGTGTACAGAGTTGTTTAAATAGTAAATATAATTTAACATAAATAAC  
 TACGCTGCATGTAGATAGTACAGTACTTTACTATAATAAAACATACACATTTATGCTAATTTATATCTAG  
 CTCCCCATGAAGTGTACGACAGAATAATGATTTGTTGACTTTTCATTGGCTGTTTGTGGATTTTATGTG  
 AACAGCCATACAAGTGTTTTAAAGTTATGTTTGTGCGAAAGTTGCTTTCCAGATTTAATGTCAACACCTA  
 TTTTTTTTTTACAATTTTCTGTGGGGTCATGCTCAAAGACTCCCGTGGCGTTAGCACTACTTTGTATGTT  
 GATTGTGTTTTCGCTCAATATGTGTTGGCTTTTGATCTCACAAATTATAACTCCCCTTTCAAACAGTCTGC  
 GTACGGGCTGTATTTGTGGGACTTTTAAAGTTATGTTAGGAGAGATACGAAGAGAATAGTTCACTGCGAT  
 GCTTAAATATGTAGCAAAACACAAGCGTACAGGCTGTATGTTGGAAACGTTTAAAGTTATGTTGGAGAGA  
 TACGAAACAGAAATGGTTCTACTGCAGTGCTTAAATATGTATGCAAAACACAAGCGTACAGGCTGTATTTGGA  
 ACGTTTAAAGTTATGTTTGGAGAGATACGAACAGAATGGTTCACTGCAATGCTTAAAGTGTGTAGCAACA  
 TAAGCGAAGTTTATAATTTGATGAAATAGCCGTGAGCTCTCTAAAGCTGGAAGCGAATTCACCCAGCTCA  
 TCTGATTTCTGTAGCTGGAGATTAAAGTTCAGACAGTAAGAAACAAATTTGTAGTAGAAAAATCTTCCAC  
 GCCTTGGAAAGATATTTCTAGTTATGTGATCTATAAAATAACATAACCCGGTTCAAACCTGTTTACCAGC  
 GTGCAGAAGATTATGAGATTTGTGTTGAACGAGTTTATTATCGGTAGGCCATCCCGACCTAATTCCTTAG  
 GACAGCCGTGGGATTAAGAGGAATCCTGGCGCCACTGTCCTGTTGGAAAATCGCTTTTGTAAAGAGGATG  
 GTATTCAAAATAAAGCCATGTGGGTGATTATATCGAAACTATTGTTGAATGATTCAAAGTCGTTAGCT  
 AAGCATATCTAAAGTCGTGTTTAAATTCGGTTAAATCCGAAATTTTCAACTGACTATCACAGTGAAACAGTAGG  
 GTTTTGTTTTACAAGATTTTATGAACAGTAGAGTTTATTTACGAGATTTTATGAACAGTAGTGTTTTATT  
 TACGAGATTTTATGAATAGTAGGGTTTTATTACGAGATTTTATGAATAGTAGGATTTTATTTACGAGAT  
 TTTATGAATAGTAGGGTTTTATTACGAGATTTAATGAGCAGTGGGGTTTTATTACGATATTTTATGAAC  
 CAGTAGGGTTTTATTACGAGATTTGATAAGCTCAGGATGAGTGTAACAGTCATGTGAATAAATGCCTAG  
 GGGGATGAACGATTTTCGAGAAACAAATCTAGATTTGGTAAATGGTTGCTCCGACATCTGTGGCAAACTTAA  
 CAGTTTATTTAGCAGAAACAGATCATCTAAATTAATTTAAAAAAGTTAATTTAGCTACTTTAAAAA  
 ATCTAAACCTGCAACTTAATAAATAAACAACATACACAGAGAAACAGCTACTTTCTTGATAACGAAAC  
 CATCAATTCACATCTTTCTGATAAATGTGTCTTAAACGATCTTGCTTACAAGACACTTGAACATAATTC  
 TGGTATAAATGTAAGCTTACGTGTATGTTTACCAGTGATAATTTCAAGAAGCTGACCGAATCACATCAA  
 TATAAAGACACTATATATAATGACTGCTGGTGAAGAGGACATTTTAGCAGTTGAAACACGGGCACTCTGT  
 TGGTTATAAATAAATCTGATTATGATGAGTAGGTGTAACCTGTAATGAAATAAATCTGATTATGAAATGA  
 GGTGTAAACTATAGATCAAAATAAATCTGATTATGAAAGTAGGTGTAACCTATAGATCAAAATAAATCTGAT  
 TTATGAAGTAGGTGTAACCTATAGATCAAAATAAATCTGATTATGAAAGTAGGTGTAACCTATAGATCAAA  
 TAAATCTGATTATGAAGTAGGTGTAACCTATAGATCAAAATAAATCTGATTATGAAAGTAGGTGTAACCT  
 ATAAATCAAACTAATACTGCGTAAAAAATTTTATCTCAGAAAGTGTAAATAACCCCTATCTAGGCTA  
 TTTATCTCCGGAGTTTTCATAATCCACTTCTCTATACGAACAGCATCGTGAGTTATTATATACATTAGGA  
 CCTCTACCGTATTTCTATTAGCGTGATAACCTCTATCCCTGACTACTCGGGAGGGTCTTGGTCGGAATC  
 TTTAGAAAGAGAGGGTCTGTAATTTCTCGTGACCTGTTTAAAGCTTAAACATAACTTATACGCTCTTTA  
 TAGAATGAATGCTACTGTTTATTACGCCATTACGGAGCTTTCAATGCCAGGCCCTAATAGCTGACGACA  
 TTGCAGTCTGGATTATTGAAGAGCCAGTCAAAATTTGTCGGACACATCACACGTATAAATGACACGAGCAI  
 TCCTTTTTGTTAGAAATTAAGAAAACTTGTCTGTTTGTGTTTTAACTTAAAGCTACAACCTTTTGTGAGCT  
 AGATTTCTGAGATTTCTTTGATAGCTCTTTAACTGGAAGGACATCAACGTTATCTGTAGAATGGCATTT  
 GGTATTTGTCATTTGTCGCGCTTGCCCCCCCCCGGGGGGAGAAGCAACATGGGTTTTCAAGTGCAGAA  
 AACCAATCACTAATTTCTTGTTTGCAACCAATAGCTTCAGACTTTTCGGCACTACTGTTTTTTAAATAC  
 AGCAGGTAATAATGCTGTTCACTGGTGGGTCTTTTCCACCTTAAATAGAGGTGTGGGGTTTACTAATA  
 AAGGTTTTTTTTTAAATTTATACCGAAATTTAATAAGCAATTTTTCGTTTGTAGATTCAACGTAACGCACTTTT  
 ATATTCTAATTTTCTAAGCCCAACAGCTGTTTTTTTGTGTTTTTTTTTTTTTACATTGAGTTGAGTATAACAG

[illegible]

TATGCGTTAGTACCACATTAGTTTTTATTGGGGTTTAGTTCATAAACAATAATTATGCGTTAGTACCACA  
TGAGTTTTATTGGTGTTTAGTCCCATAAACAAATATTTATGTATTAGTAAATTTATGATTCATTATATA  
ACTCAATTTTGATAAATCAATGACCTACTTCTTGGTAGATTTATTAACCTATCTGTACTAACAGTCACTAAT  
TTAACAGTTATAGACTAGAGATAAGGCACTAGTGAACACCACCCACCGCCAACCTCTTGAGCTAAGCTTTT  
TACCAACAAATAGTGGGATTGACCATCACATTATAACGCCCCCACAGCTGAAAGAGCGAGCGTGTTTGGG  
GACGGGAATTCGAACTACGACTCACAGATTACTAGTCCAGCGCCCTAACTACCACACCAGACTAAAGAA  
TGAAAACCATTTCCAAATGTTAGTTAATGTTTATTGCTCTATTTGAAGGTTCTGTTACCCAAAATATAGCTG  
TAAGTTACACACTGATTATAGTAAAAAAAAAAAAAACTCAATAACATGATGCATAATGAAGTTTCAAT  
TTCTATAGTGTTCCTCCAGCGTCTAGCGTGGCGTGAATCATTTGTCTTCAGCAGCGTGATCCTTCTTCCT  
ATACCTACATGTTCCATGATCAGCTCACTTTAGGATCATATTTCTCGACCTTCTTGTACACCCAGTCAGCC  
AATTAATGGACACGCATCTTATTCTGTTAGCGCGAGCAGTCCACATGGAGCAGGTGAGTAAACGATTTCT  
TTGAGTTACATGTTCAAATATGGAGAACAAAAATGGTCCCTTATTAACCTCTAAAGAAAAAAATTTATG  
TTTTGGAAAAGAGCTCGGATTTCTTTGAACTGTAATTTGCCTAAACCTCAACAATAGATTGTCTAGAAAAT  
TTTGTGAAAAGAGCTTATGCTTATGCTTAACTGGAATTTTAACTTAAATATGATTTTACACAAGTCTTAAAG  
GAATTTTTTAATAAAGTTGTCTATGCTCTAATATAATTATAGTTTATAGATGATAAACTGTCTGGAGAATAA  
AATGATGTTTATGAGTTGAGTACGTTGTATTAAACGATTTAGGAGCCTAACCCCTCGTTACAATCCA  
CGTCACCACGACCAGTTATGCTCTATCTGACAACCATGTATCTTGAGAATAGCCCTACATCATATTTTCC  
ATTGTGAAAAGAGTTTATGCTTATGCTTAACTGGAATTTTAACTTAAATATGATTTTACACAAGTCTTAAAG  
ATATGCAGTGGTTAGCTGGGAGATATGACTGAAATTTATATCTTGGGGAGCTCATACATTGTTATCTTTG  
TTACTAGACGGAGATCCTTCTTGATTATGTTGCGTATTGTTGCCTGGTCCACGTAAACGGCTTTTGCTAC  
GGACCTTTATGTTTGTATGTTTACCTGTTACAAGACGCGCACCTTGTCTAACCATGGCTAAGGTACGAC  
CTGTACTTTCATAGGCGAAGTCAACCAAGTTGAGTCTTATTACTGAATACCTTGAGGTCTGGAAAATACA  
CATCGGACATTATAGCAGCTGTTGTTATCACGTGACTTGCTGATTGCTTATTTCAGAATAGTTTTAATA  
TAACGTAAACTCAACCTGTATGATACACAAGTGTCTAACTTTAAATTTTTTCATTATTTTAGGGTAAAT  
TCTCCAGGCGTAAACCGTTCTCTTCAGGTTCCAAGCCAAGGTCCTGATCTTTCAATGGCTACTAATTACT  
GGCACCGTATACAGTGAACAACCTTATAATAAAGGATACCTATCAATTGTCTGATGGTGGATTAAAAATC  
TTGTTCCGTGGAGGTGTTTAGAGATTTGAAGCACGTTAGATGAATCGACCCCTTAAATTTATATGCAGGGA  
ATGGTAGTATCTATTAGTGTGATTCTTCAACAGGCAAAAAAAGTGAATTTAAACCTTGAATACCGGAA  
AGTGTCTTAAAGATTTGAAGTCACGTTCCAGCATGGCGTTTCAATCATTATGTTAATAGTTTTTGTATTTGAA  
CTGTACTTTCATAGGCGAAGTCAACCAAGTTGAGTCTTATTACTGAATACCTTGAGGTCTGGAAAATACA  
ATGTTTTTACGAATTAGCCTTACGTTACAAGAAACAATAAATTTCTTGAATGTTTTGACAATATAGTATA  
GCTTTGATCTTATGCGGAAAGTGTCTTAAAGATTTGAAGCTTGGATACAGAATCGTTCTTATGAATTA  
CAGTCCACAGTCACTGGTATTGTGGTAGCTTTGGCCAGTTTTGGAATAATAAATTTAGTGAAAATTTGTCTT  
AAGGTATGGCACTGTTCCCGATAAGTCAATGTTGAAGTCAAGGATGAGTCAAGGATGGCACTGTTCCCGATAAGT  
ATAGATCAAGGATGGCACTGTTCTCGAGAAGTCAATGTTTAAACCGATCAAGGATGGTACTGTTCTCGAGAA  
GTCATGTGTAACCGATCAAGGATGGCACTGTTCTCGAGAAGTCAATGTTTAAACCGATCAAGGATGGTACTG  
TTCTCGAGAAGTCAATGTTTAAACCGATCAAGGATGGCACTGTTCTCGAGAAGTCAATGTTTAAACCGATCAAG  
GATGGTACTGTTCTCGAGAATTCATGTGTAACCGATCAAGGATGGTACTGTTCTCGAGAAGTCAATGTTTAAACCGATCAAG  
ACCGATCAAGGATGGCACTGTTCTCGATAAGTCAATGTTTAAAGTATCTAATTGCATGCTACGG  
TGTTTTAATCTAATAATCTCCCTCATAGCTCAATAAAATATTAAGTTGTAACAATAGATATGTGATTG  
TACTTTAACACACTTAGTAGAATGAGGTGTAAACCTAAACATTTATCTGGTAAACCATAGCTGTAAAAAT  
TTTATCTGGATTTGTAATAGATTGAATGAGATCCAGTTTAAAGCACGGAATTTAGTGGTCATTATCAGGT  
CACAGGAGAGTTCTATAATTCTTGCATGATCTTTAAGACGAATATATCCACTTTTGTGGTAAATGGTTT  
AAAGATCTTTGCTTATTTCCATACATACCATACTTGGCTGTCTCCATTATATATTGAAAACCTTTAGGAAA  
GCTATTATTGAATTATGAAGTGAAAACATTACCATCCATTTTATGATGATTTTCTTTCTTTTTTTTTTGA  
GTCGTAATCTCAGAAAATATTTGTTATCAAAAGTGAAAATATAATGATTATATAAATTGCTGTAAACAACG  
GATATTCGTTTTTTTTTCTGTAAAAACAGTAAAAATGCGTCTCTGACTGGCAAACTACTAAAAATCTTA  
ATAATACATACTATGCTAAATTAATATATACTAGTTCAATGAAATTTTGTTCACATAAAATATTTTTGT  
TATTATCTAGCGCAATTGATTGGTTGTGTTTACACAAATATTGTCACATGGTTATGTAAAAATCACGTCT  
TCGTACAGGTTTAAATAATCTTGAAGTAGTTTTTTGGTCTTTTGGCCACATTTTTTCCCCCTTAAAAAC  
TTTTTTTGCATACTTTACACATATTATCATCGAAAAATTATTATCTCGATTTTAAAGTCAAGTATTTTGA  
CTAAAAATATAAGACTGATATTGATTACGACTTCTTCCATCTGTATCCATTTAAGACATAGATTATCCTGT  
AGATGCCGAATAATAAAGTTGCTCGCGTAGCACATAAACTGCACATAATTTCTCTTTGGTGTTAAAAATA  
TCACACTGAAATTCATCAGAGACAAAAATTTAGTACAAATTACAGATCATAAAGTGTTCATCCCTTAAAGGT  
TTTTTTTTTTTACTTGTCTGATGTGTGCTTATATGTAATTTGACAGCCATCTCCAGTAGTCTTAAATAGCT  
CTATAAACGATCACATCCTAAATGTACATATATATACGTAGCAGTAATATCAATTGTGTACTGGCTGTAT  
AGGATTTTGGTCAAGGGTATTAGAATGTATGTATTGCAGGCTGTGTTGTATTATAGTTGCCATATGCAC
