# Supplementary material for: Evolutionary Conservation and Diversification of Five Pax6 Homologs in the Horseshoe Crab Species Cluster
Source: MDPI journal article supplement (doi:10.3390/arthropoda2010007), 2024-03-04
Supplement: s1 [file s1]

>QXHF01007346.1:1648475-1673834 Tachypleus tridentatus isolate BBG1  
scaffold1101, whole genome shotgun sequence

ATTTGAAGAGACTGATCGGCTGACCAGCAGCTACTAACAGCTCCTGTAGTTTTTGAAAACCTCAGAGAAAA  
ATGCCTCATAAAGGTAGGAATGAAATGACTCTTAGGGGTAGGAAGTCTATATATCATTGTTGTTGCAAA  
AAAAGAAGCCTTTACGTGTGTGTTTTTTTTTAGTTTAAATGAACTGTTAGCTGCGTAAAAATATAAGTTAA  
CACAAGCTGTAATTTTACTCTTTAAAGTTGCGTGAAATTGTAAATATTTAGTATGTTTATATGCAAAAA  
CGGCTCGTTTTGGGCTGAGAAAACTTTTACATAGAAGCCCAAACGAGCCGTTTTTGCATATAAAATTTCT  
CAACAAGTGGGTTTCTCGTCATCACTGATTGTAAATATTTAGTGTTATTTAGTAATAGAAATTCAGTTTG  
TTGTTAATGCAGAAAACAGAATCGTAAAGAAGTTGCGAATACTGAAAAGTATTTTCATCTATCAATCTGTT  
TGTTTGCCCTATCTTATCATTAAATATATCTTTACAAGTGTTAAATAGTAATGTTTTTCATTGTTTCATTT  
CATATTAATAACTATATAAATTTAATTTGCATAGGTATGTTTGCTGTTTGTGAAGTTTAGTATCCTTTCT  
GTTTGTTGTCACCTAAGCAGATGACAGAGTGTTAATGCTTTATAATAACAACCTTTAAGAAAAATTAATA  
GACACTAATGACACTAACACCAGGAGAGATAGCTGTCAGATCGTACCAAGAATCATCAGCGACACGTTT  
TTTACTCACACTTTTCTGAAGAGTTTATTTAGTAATTTTTAATTTTCGTTTGTTGTTGTTCACTTCAGGT  
CACAGTGGAGTAAATCAGCTGGGTGGGGTGTACGTGAACGGACGGCCGTTGCCAGACTCGACCCGTCAGA  
AGATCGTGGAGTTGGCCACAGTGGTGCTAGGCCTTGTGACATCTCCCGTATACTGCAGGTCTCTAACCG  
TTGTGTTTCCAAGATACTGGGACGATACTACGAGACCGGTTCCATCAAACCCCGGACCATTGGTGGCAGT  
AAACCACGTGTAGCTACTTCAACTGTGGTGAATAAAATAGCCGACTACAAACGAGAGTGTCTTCCGTCT  
TTGCTTGGGAAATTCGAGACCGACTCTTGGCAGACGGGGTGTGTAAACAGTGAGAATGTTCCAAGTGTAAAG  
TACACCCCAAAATAGTGTCAACTGTGAACGTAACGGAGAAAATTAGAAACATCTCGAATTCATTCAAACT  
GTTAAGATTGATATTAAGCACTTGCTAGTCTCTAATTCAAGCATAAAAAATATCTATTTACACCTTTGCA  
ACATTACATTACATGAAAAATAACTATTTACACCTTTGTAACATTACATGAAAAATAACTATTTACACCT  
TTGTAACATTACATGAAAAATAATTGTTAAATTAATAAATAACTAAGTATAATTGGGAACTGTGATTAA  
AATAGTTTTTAAATATCTGAGGTTAGATATTATATGAGTGTGAAAACGGAGCATAGTGTGAACTTTCTTCT  
GGCTAAGGTCGTTATGATAGATTGGTTAATCTTCTGAAATATTTTATAAACTATTTTTTTTACGTAGCTTT  
TAGTGACGTTTTGTTTCAACAAAATTGTTAAACTAATGAAGATACCGCATTACGAACATCATTAGGGGAAG  
TAAAAATAAACATTTCTTTGGTAACATTGATGGCGAATTATTTGACACTAGTATATATCACAGTTGTCCT  
CTGATGTGATATTAAATGTGCTTCTAACGACAACCGTAAAGTTGGAACCTCAATGCCAAACCATGTGATGA  
CATGGTGTCTCCGTTTCAGGCACGTGGCTCAACTCCTTTGTAATTGCCCCAGTGGCTCAGCGGTATGTCT  
GCGGACTTACAACGCTAAAAAACGGGTTTTGATACCCGTGGTGGGCAGAGCACAGATAGCCCATTTGTGTA  
GCTTTGTGCTTAATTCAAAACAACAACAACCTCTGGAATTTTGTAAATCCTTCTAGAAGTGTAAATTA  
TTAACAACGATACACAGTTCTGGTAGATGTGCAAAGGTCATATCGGTTAGGTTTTTACATTTATAGCTCG  
ATCTCTTGCTGCTTCAATTGAGTTTGAAATGCAATTATCTTTTTTTTTCTTCTCGCAAAAGTGACGC  
AAATGTTCATTTTAAACCAAGTCTTATCTACAGGCACATTACTCGTATTCAAAGGAATTATAACACAA  
TCACCCTAGTAAATATTAGTTTTGGGATTTTCTATAAGGTAGCCTGAAAACACTGTACAACGACTGTTA  
CTCCAAAAGCCTTGACTTAGGAATTCGACCGACCCACACCACATATAAAGTTTTTGATTGCATAAAATAG  
GACAATGCTTTCTGTCTAAGGTGTCAAGTTAAATTGTGGTTTACATCTTTTTTTTACAGGTGTTTTTTTT  
TAAGTTTTTGCCGCTGTATCGATAGCATGTGCGTGAACCGAAACGCCATATCCAGGGATTTGCACATGTAT  
GACTGACAACTGTGAAACCAAAACAATAAAACCATGCGCTGATAGTAGTGGAATAATGACAGTTTCAGT  
GAAAACATAAGTTATAATTGACAGACCTGTGTAGTATTATACACATTTTATATGCAACATTTGCTACTGT  
ATTAGCTGTCAAGGTGCACTCGACACATCTTATTACACTTTTTTGGTGTCTATATAACTTATGATGTTTG  
ATAGTCGTTTTTAGGATAAGTTATGATATGTACATTGATGTGCCTTGCAGCATTCAAATTTTAGTAAATGA  
ACCTAAATTTATATCAACTTTAAAGCAACCAAAACATGTTATTATATAGAAGTGAACGACTAGATGATG  
TCTCTAAGACATTACAAATCAGTGGTAAATGTTTACATAAACGATGCAACTCTTCTACTGAAATGCTTGT  
CCTTGTTTATGTCAAGGTATGAATATACTGAAACATCTTATTTGCTCATCTTTATGCAGTTACATCTATTT  
CTATGGATTACATAATCAATTTCTTTCATTAAACAGTGATCTAGTTTGATTAAATAACGTTCAACTATCA  
ATGTGTTGTTTTTAACTACGCAATAATTTGGAAGATACGTGGTTTGAGTCTCATATGAGCATAAGGTGAA  
AACAAGAAATAAACATATCTTGATTTTACAGAAAATTGGTAAATAATATGATTATGATGCCTTTTAAATA  
GTTTAACGGGTTTATTAAAAATGAAATACATGCCATGCGTTAAACAACGGCATACCTGCATAATAACTTTT

GGAATCGATTTGGGGAACAGCTTAATATCACTTTTGTTTAACAACGAGGGTTAATGTTGGCATACGCTCG  
GATACTTAAACTCATATTTCAATGATTAAATGGTAGGTTTACTGACATCTTAATGTTATATCAGAAGTGT  
ACTACATAGATCACAAATCGCGAACATATTGTTAAGGAAAACAATTACTCGTAAAAAAGAAATCCAGGA  
ATATGTCGGGGGAGGATTGCTTTAATATAGCTTTATTTCGAGTTCCTAAATGTAAGGAAAGATTTTATATAA  
AGTAGTGATCTAGCGGATGTTTTTCGTGTTTCATAAACTTACTAACTTAGAATTGAAAATACAAACATTTTC  
GCTCTGTTTTATTTTTATCAACATAAGTACCTGGAAAAGTTAGACATAAAATATCACTATAAATGGGAAC  
ATGGGACGTCATGCCACTGTTTTCAATCTGCACCACACAAACCGTTTTGTCCGTCCCAATGTTACCGTGGT  
ACACGCGGCATCAAGAGCCGTTTTTCGTTTTACGTCGATTTTCACGTGTTTTTACTCAGATGAGCTCAAGTTC  
ATTTTCACGTGCGTTTTCAGGTGTTTTTACTCAGTTGAGCTCTAGTTTCGATTCACGTGCGTTTTCATGTGGTTT  
ACTTACTCAAGCCCTAGTTCATTTTCGTGTCGTTTTCAGGTGTTTTTACTCAGTTGAGCTCTAGTTCATTCA  
CGTCGTTTTTCAGGTGTTTTCAGTTTTCACTCTAGTTTCGATTCAGGTGCGTTTTCATGTGGTTTTTACTCACTTAA  
GCTCTAGTTTCATTTACGTAGGTTTTCATGTGTTTTTACTCAGTTGAGCTCTAGTTAATGTCACGTGCGTTTT  
CAGGTGTTTTTACTCAGTTGTGCTCTAGTTAATTTTCACGTGCGTTTTCAGGTGTTTTTACTCAGTAGTGCTCT  
AGTTTCGATTCAGGTGCGTTTTCATGTGGTTTTTACTCACTTAAGCCCTAGTTTCGAGGAATCAGCGCGGTATAA  
GTTTCAGTATAAAAAAGTCACCTGATTTCTTATCTAATTAAACTGGACATCTAGGATCAGATTTTCTTTAAC  
AACTTTTATCAACATTGATTTGTCTAGATCGTCATAAACTTCTCAGAATGGCGGAACACTACATACAC  
ACAGTATGTCAATGTTACTAAATGTTTACCGTTTTACGTATTGAGATCAGATCAGATTTTAAAAATCCATT  
GATACTGTTACAGGTAATTAATAATTTTATCAATCTGTAATATTTATAGGCTGAACAAAAAATTTCTTAA  
TTTATGTAGCTAACATTGAAAAATCTTACTTCAGTATAGGACAATAGGACTGGAATATATTTTTCATATG  
TTCAGTGACGTTTAAACGAAATTTTTTTTTGGACAGGTAACGTCGAAGTTGTGTATCTTTCAGTCATAGCAT  
TATGGCTGTAACAAAACATTTGAAGGAATACATTTATTGAATTATATAAAAAACGTTTCATAATCCTTCG  
GTAGGCTTCACTTGGGGTTTAGTATGTGTTTTCAAACAATTATTTTCTAAGTTATTTACGAAGTCAAATTG  
TCTTATTGAGTTACAACCTCCATTTAACTGTAAAAAATGTATTTCTAGGTCTCTTTATCATTGTGTTGTT  
ATTAAGCACAAAGCTACATAAGTGACTATGTTTTGCTCTGCCAACACGAGTATTGAAAACGGGTGTTAA  
ACCTTCTAAGTTTGTAATGTACCGCTGTGCCACTGGGGAGAAGGTCCCATATTTAAGGGGAAACAACG  
ACAATCACAAATAAGTACAGCTGAAGTGCATGTTTAAAAAACTCTTCTCTTGATGGTTAATGTAAATAA  
TTGTGTGAAATCAATGAAGCAAAAAAATTTGGTGAACGTGAACGTCAACATATCAGCTTTTATCAATT  
CGTTTGTATTGGATGCACGATTCATTTTTGTTTTCTAGTAAATACTTTTAAAATCATTTTAGAACGTTAA  
CTCCAGATATTCCTTAAAAGCTGTTATAACAGCTGAATTGTAGCTTATTTCTTTTTTTGTCTATTAACAC  
AAGTTTAAAGACATTAATAGTGTTAAAGTGCTTTTTACCAGTATATTCTACATATAAATATATATATGTGCG  
TAAATATGAAATGAAAACCTTTAATTTTTTATCCAGTGATTATCTTATAGATAGTTGATACTAGTTGAGT  
TATCGAAAGATGTATTATATTAAGATGGTTGATATTAAATGAGTAATCATATAATTATATAATATAATA  
TATTTGCTTACAACATAAGTAAATGTTTAAATCTTTTCATTTAATGTGTATCATGCTTCTAAGCCTTT  
TAGTCTCATTTTATAGTTCTATATAGTTATAGTTCTGGTTCTTGAGAGAGAGTAATCACAAATGAAGTAA  
CAGTTAGATTATTTTACTTCTCTTAATAAGGATAAACAGAAAAACAAAAACAGATAAGTGACCTAATAA  
TTTATCTCTGATTATCGTATTAACTCGTGTTTGAACACATTCTTATTTGAGTAATCCAGTAATTAGCAA  
CGTAAATCTTAGAACTGTACATTACTAATTACATGAAGTATATCTTTAATGTTTCGAGCATACAACCTACA  
GTTTAAACGGTTCCTCGTTTTGTCCATTTCCATGATTATGATCTACCTTAGGTGTTGTACATCTCTAACATC  
TTAAGACACCTCATAAAGTTTAAACGATTTCTCGTGCGTTGACTTCACTAATAATTATTTACCGAAAAATTG  
AAAATTGTTTCACGCATGCGTCGATCAGATATTATCAGGAAGGAGAGTATTTGGAAGCTATCGTTTTAAA  
TGATTGCTTGGTTTTTCGAGATTGTCAGGATATGTACGTTTTTCTGTGAGACTGTTAGTGGGTCACCTTTT  
TTAGTGTTATATTTGTCAATCATTTGCACTACAGGTGGTCTGCACAATTACACAGGGTAATCCTGTGAG  
AAGGTGTCGGTGCTAAGGTGAGATGTTTCAAAAATTGCTATGAGCAAAAATCCTCTGTGAATTTGACAAG  
CGTATCCAACCTGGCTTTGAGATTTGACAAGAAAATTGGCAGTTATGTCGACCAAATCAATGACGTCTTTT  
TAAGAGGAGGAAATCTTTCGCTGGCCTGAGTTTTGACGTGGTTATTATATGTTCCAACCTAGGAGTGAGAC  
TAGGAAACATAACGACACCCATATACACGTTACTCGAACCATGTGAGGAAAAATTTTCACTCGTTTTTTTT  
ACTTATTTATTTGCGCTTTTGTCAATTGCAGATCACAAGCGCCATAATCAGAACCCTTATGGTCCAGAAGTAA  
AGAAAATGTTATATATGAGTTAAACAAATAAAAAAGATTGGGTTTTCTTGCAGAAGTATATTTTCGAATGACA  
TTCAAAACAACACCATGCCATTTCAAAAATTTATATATCGTATGTGTGTATATATATAAAACCTGTAAATA

TATATGTTTACAGTACTGATGTTGTTGTCAGATCACCTGATTTTTGTCTCTCGTGTACTTCTTTTTAAAT  
CGTGTGTTTTAAGATAATTAAGTTTCGTAATGTTAGAAAGTTTGTGTTGTTGTTTGGAAATTCGCA  
CAAAGCTACTCGAGGGCTATCTGTGCTAGCCGTCCTAATTTAGCAGTGTAAAGCTAGAGGGAAGGCAGC  
TAGTCATCACCACCCACGCCAACTCTTGGGCTACTCTTTTACCAACGAATAGTGGGATTGACCGTCACA  
TTATAACGCCCCACGGCTGGGAGGGCGAGCATGTTTAGCGCGACGCGGGCGGAACCCGCGACCTCTCG  
GATTACGAGTCGCACGCCTTACGCGCTAGGCCATGCCGGGCCTAAGAAGTTTGTAATTAGGGTTATTGAA  
AAAAGATATTTGAATAAAATTTAATGTTGCGTGGGAAAAATAATTGTTTACAAAATACGTTTATGATTTAA  
GAAATAGTTTGGTGTGTCTTATTTTTGTAAACCGTCATTACTATTTGTTTTAATCTACATCAGCCTTAGAC  
CTAACAAAAGCAAATGGTAGCATAATAGAAAACTGAACTTTAAATTAAGCACATTTAAATAACTGATTA  
AAGATTTAACAACGTACCTATACACAAATCATGGTTACAAACTCATTTGTCAAAACACCAAAATATGTAC  
TTTCAGCAACATATATATATATATACACACAGACTAAAATGTAACCTAGTTTCTGTTTAAGAATGTGTTA  
CAGTGAAAGCTTTGGCACTAATATGGATTCTACTCTAAACTTGTTAATCATAGTGGTATATTTATTTA  
CTACTATTTTACAGTAGTATAGAAAATATTGATGCTTGAAAACTTATAAACGCTAGATTTGATAAAAAT  
AAGTTTCATAAAAAGTTTAAAAACAAAAACGAAATTAATTAACCTCTGCTGTTAAATAATAACGTGTGG  
TTATGCACATAATTTATTTAGCTTGATAAATATGGAAGGATAAGAAAATAAACACTCAATTTGCAAGCTG  
GCGGCCCCGTATGGCCAACCGTGTCAAGGCGTTCGACTCGTAGTCCCATCGGTATTTTAAACACAATTTT  
GCAACCGATTACTTGACCATGGTCTATTAACGTGTGTTGGATACAGGATTACTGTAACAACATGTGAGTAA  
AAAAATGTAAACATAATTACTTTTATTGTTGCTGTTACTCTCTCTATTACTGTGCCTTTTACATTTGTTT  
CTCAAAATTTATTTACACTGGATGTTGTAAACGGTAAATATATTACTCGGTATATTGTGATATACATGTTA  
AAAACAGCATGAAACCGTATAGGCAACAAAGATATCAAGATTAATAATAGGTTGAAGAAGAGCCAAGTT  
TTATATACTTTAAAGAAGAATGAAGTTTTCGAAATGTTTCTTCAAATCGTACAGCTTGTAACGCCATGAACT  
GTGCCATCAGAGAACTGGCTCGAAATGTCATCCTTCTTTAAATATATATATATACATGTTAAACTTCACA  
ACTGTTCACTTTTAAAAATAACAACATAAATACAAGTGAGAAATTTTAGGGTTAAATACCTTTTTTGT  
ATTTCTACTTTTATAAAAAATAACACCAGTTCCTTGAGTTTATAACAACCTCACATTCATTATGGTCATAT  
TAATTTATATTTTAAACAATTATTTTATGTTGGATTCCAGTATTTTATTAGTAAGTACTTAAAAATGTAAA  
AAAAATCGTCATCAGGTAACGCATAAGTGAAATTATGTCCATAATACGATACTTCTGAAATATATATATG  
TGGTATTTAATCCATAATACGATACTTCTGAAATATATATGTGGTATTTAATCCATAATACGATACTTCT  
GAAATATATATGTGGTATTTAATCCATAATACGATACTTCTGAAATATATATGTGGTATTTAATTTTTAT  
GTCTATAATACGATACTTCTGAAATATATATGCGGTATTTAATTTTTATGTTTATAATACGATATTTCTA  
AAATATATATGTGGTATTTAATTTTTATGTCTATAATACGATTCTTCTGAAATATATATGTGGTATTTAA  
TTTTTATGTCTATAATACGATTCTTCTGAAATATATGTGTGGTATTTAATTTTTATGTCTATAATACGAT  
ATTTCTGAAATATATACGTGGTATTTAATTTTTCAAAGTAACTGACGTAAACTATTTCTCTATATTTGT  
TACAGCGAACTTAAATTTTATTTGTTAGGCCCATCGATAAACGGTATTGATTGTAAGTACCAATAGACG  
AAGCTGCAATGACAGTTGATATATAATTAAGTTTGTCTTTATAATTTCTATGCATGCGTTAATCTGATT  
CTTAGCAACTAATTTAAATATTCATTGAAACGAATAGATTCTATGTGGTGGTTGAGTTTAAAGGATGTT  
TTCAAACTAGTATTTAAACGAATCTGCGTATGACAACAGTTATATTTGATTTATAATTTATAATTTAACTA  
AATATAATTAGTTATTTCTATAAACTGAACTTCTACTTCTTGCCCTCATTAATTAATTAACAAAAAAC  
TGTTTACACTTGGTAAAGGACACTCTACAAGCATCCATAAGATAAAGCTATATATTTTAAATATTTTGGAT  
CAAATATATTTAGGTATCTTCCATCAATCGAGTTTTAAGGAATCTGACGAGTCAGAAAGACCAACAGGAA  
ACGTCTCCTCACCATGTCCCATGACTGGACCAGAATCAGTTTATGACAAATTACGGTTGTAAACGGTT  
CCCAGCCCTGGCCCTGGTACCCGACCGGCCCCCTCTCACCCTTTCACGGCATCCCTCCCACATCATCGCC  
AGTTGCTCTAGGCCAAAATGCGGGTCTTATGGGACCTGGCCACGGGGGAAATAGTCACCTAGGTCTTGCA  
GCGTGCGAAAGCCACCGTCAGGATCATCCTCGTGTTAAAAAAGGTAAATATTTTGACTTGTATGATTGTG  
AGAGCTGGAGGTAGTAGTTAAATAAATAAATCAAACCTGTTTTTATATTTTTATGACTGTGCTCATGAAAG  
GTTTATTTGTCAAGGTTGTATGGTTATCTCTCTTATTAGGTAAATGATTCAAATACTCCTTAGTAATCT  
GAAATACTGTAGAAAACTCAACAGTGAAAGTATTGTGGATTTAAAGTTTGTGTCAGGTATTAGTAGAGAAAC  
GAGAACGGCTCAATGAAAGAGAACAGAGATTTAGATAAAAAATCCCCNCTTGATGATTGTGAGAGCTGG  
AGGTAGTAGTTAAATAAATAAAGCAAACCTGTTTTTATATTTTTATGACTGTGCTCATGAAAGGTTTATTT  
GTCAAGGTTGTATGGTTATTTCTCTACTGAAGGAGCAACAGTGTAGATTATTGATTATTAGGTAAATGGT

TCAAAATACTCCTTAGTAATCTGAAATACTGTAGAAAACCTCAACAGTGAAGTATTGTGGATTAAAGTTT  
TGTCAGGTATTAGTAGAGAAACGAGAACGGCTCAATGAAAGAGAACAGAGATTTAGATAAAAAATCCCCCA  
TTCGTATAGTCTGAGAGCGCGAAGATGAAATTGCTTATACGGTTCCTGCATCATATATTAAGCATGATG  
TGTGTGTTAATAGTTTATAAGTTTGACTAAATTCGTGTTATGAATTAATGTGAGTCAATTACACAATTTT  
TAGTTTAATCTAACAGTTCGGTCAAATATGTATTTATGTGTATTTCCATTTCGTCCATGATATTTGAATG  
AAAATATATTTAAACAAAAACATCTTGGAATACATCTAGTTTTTTCACATTAGAAATTTCTAAGATAAACT  
GTTTCATTAAAGAACTAATGATGTATATTACACTTCCTGTTACAATAATGGTTGTTGAATATTGATG  
AATAAAAGTGTTATGGCAATAAATGTATGCTCTCTCGTAAGCTTTTGATTCAAGTTTTCTAAGCCTAAAA  
TAACCTAAACTGAGTTAAATATAATTTAAGTTTAGAATTTATATTGATGTTGATACGTATTTACTTTAT  
GACATTTGTCAACAAGATTAATACACACAGTATTCTTTTTTTCTAATACAAATATATTTTAAATACAGA  
CACTAAAAATTTACAATAATGGTATTACAAATAATGACCAATGTATAAAAGTTTTGCAAACCTTACACAAA  
TTATTGAGTATTGCATCTGGTCTGGGACGTCTTTGATGTCTTAGCGGGGGTTACAGATTAACGAATTAAT  
TTTGAGTTGATGTCGATACAATTCATTTAACAAGAAGCTAGCTAGCCCTGTGTTCTTTGCCGAGTTTCCA  
CTGCTGAAGTTATGCAATGTCTTCAAAAATACTAATATCCGATCTGAATCCGTTAAAGTGAAATGGTTTG  
CAATGTTAGAAATCAGTGATGACGAGAAACCCACTTGTTGAGAAATTTATATGCAAAAACGGCTCGTTTG  
GGCTGAGAAAACTTTACATAGAAGAGCGAACAACGTTTCGACCTTCTTCGGTCATCGTCAGGTTACC  
GAAGAAGGTCGAAACGTTGTTTCGCTCTTCTATGTAAAGTGTTTTCTCAGCCCAAACGAGCCGTTTTTGCA  
TATAAATGTTAGAAATCTATAATCGCTCCTAGTCAAATATCTAAAGTTCTCAATTAATAACAATTACAGC  
TTCCTAGCTTTAGAGTATACCAACTGTAATATAATAAACCAACAGTATATACGTTTTTCTGGCGTGTGGC  
GTTGGTTACACTTAAAGGTGTGGGGAAAGTTTCTCCAACTACAGGTGACACAACAATATTTACGTTTAC  
ACACACATATTGTTGGTTCTTACACTCGAGAATCTTCTACAACCTTTAATGAATAGATGGGATTTTCGCAG  
CACAGATTTAATGGCATAAGTTATGTACATTTCTAGAAAAAATTAGCTTAAACAATCATCGAAATTTAA  
ATCTATATCCGAAGGTAAATCCGTATAGATTCTACGTCACAACTGCAAAAGAATGTCTCTTCAAGCCG  
CAAAGAAAACTCATTCTGTAAAATGACTATTATGAGCAACAGAATGTAATACTTAAATTTATGAAAAGA  
ACCAAACCGAATCAGGAATTACAGAGTCTCTGTAGTAGCTTATAGCTTATAGTTAATGTTGGTCATCTAA  
TGATATACGAGATAAAGTAATACTCCAATACTGGTTTTACACAACTATCTTTTGTTCATCCTGACAAT  
ATGAAATTTAATAACCAATTATGTCTTTTCCATAATAACATGTTTATAAAGGCATCGGCTATAGGCATG  
CTACTTGGTTGGTTGCTGCTAGTCTGGGCTATCTCTTTTAAAGATATCTGTCTTAGCTTGTAGAGGTGAC  
ATGTCTATCAGATTAAAAATTAAGGAAATATATTATTCAAATGTTCAATTTATATTCCGAATGTTTTTTT  
GAAGAATAATATAAAATGTTTGATATTTAACAAGAAGAAAAAGTTGTTGTCGAGTGTATTCAGTTTGTTA  
GTTTCATATCAGTTGAATTAACAAGTATTAACCTTCCAATGTAATACAATATAATACAAGTATATGATCTAC  
AAACAAACGTAGAGAGATTGTTGTACTCGGTGTTTAAATTCGTGTAAAACCTCGTCACGGGGCCAGCATG  
GCCAAGTGTGTTAAGGCGTGCGGCTCGTAATCCAAGGGTCGCGGGTTCGAAACCCGGTCGCACCAAAGAT  
GCTCGCCCTTTCAGTCGTGAGGACGTTATAATGTGACGGTCAATCCATAATTCGTTGGTAAAAATAGTAG  
CCCAAGATTTGGCGATGGGTGGATGATGACTAGCTGCCTTCTCTCTAGTCTTACACTGCTAAATTAGGGA  
CGACTAGCGCAGATAGCTCTCGAGTAGCTTTGTGCGAAATTCAAAACAAACAAACAAATTTTCGCAAAAT  
ATAAAAAATCAAACAAAATAAAACAATGTTTATTTGTGATGAAAGATTCAGTGAAAATTACACTTGATAAA  
TAAGGGCATGACAATATTATTAAACAACGAGTCGGTGGATGTTACGTTTTATAACTCGTGTAACGGAAACA  
ACTGTGTTGATAAGAGAAAAATTGAAATATCATGCTATTGATGGATGGATACTGCAGTTTTTAAACAACGG  
TCAATCCCAGTATTAGTTGGTGAAAGAGTAGCNAAACCAAAAAAACTCGTTACGAATGAGATATCTAT  
GAGCCAGTTGCTTAATTGGCCACGAGCTCTAGTTTTTACTTCACACAGTTTGTTTTGTGAACATCATCT  
CAATACGTTATTTTACTCGAGAAAAAACTAACGAACTCAAAAACGTAAAATACCAACACTCGTGTGA  
AAAACCTCGGTTTAAATAGCTGTATCATATTTTTTACACATTTCGATGCTAAATAAATAGCTTTTCTTGCT  
TTCATTGCTAAAAATTTCCGAATTCCTGTTGTTTATTTCTTTATGGAGGAAAATATGTTTTATGTATTTT  
GTCGATTGTGTTTTCGGCGAAGGAATACAATACAGGCTAAACCCTTCACACAGTGACACGATATACTCT  
GAACAACTATTCAATCTGATAGAAAGCATGATTTTCGTATTTAATAAAAAGTTCGACCTCTATCGAAGTT  
TAAGAACGTCTAAGGTACAACGCTCTAGAATACGTATCCAGAGTTTATATACGTTTCAGTACACTACATTC  
TATGAACACTCATCTAGAGAGTCCATAAACCCACATATTAATGAGTGCTGGGTACATATAGAGTTGAAA  
TGTAGTCATAAAACAAAGGTCAATCCAAGTATTAGTTGGTGAAAGAGTAGCCCAAGAGTTGGCGGTGGGT

GGTGATGACTAGTTGTCTTCCCTCTAGTCTTACACTGCTAAATTAGGGACGACTAGCACAGATAGCTCTC  
GAGTAGCTTTGTGCGAAATTCAAAACAAACAAACAAATAAATTTTCGAAAAATATAAAAAATCAAACAAA  
ATAACAAGTGTTCCTTGTGATGAAAGATTTCAGTGAAATTACACTCGATAAATGAGGGTATGACAATAT  
TATTAAACAACGAGTCGGTGGATGTTACGTTTTATAACTCGTGTAAACGGAACAACCTGTGTCGATAAGAGA  
AAATTGAAATATCATGCTATTGATGGATGGATACTGCAGTTATAAAACAACGGTCAATCCCAGTATTAGT  
TGGTGAAAGAGTAGCCAGGAGTTGGCGGTGGGTGGTGATGACTAGCTGCCTTCCCTCTATTCTCACACTG  
CTAAATTAGAGATTGTTTGCGCAGATAATCCTCGTGTAGCTTTGCGTGAAATTCAAAACAAACCAAACAA  
AGAGATTGATCAGATCAGGGATTTAAAATTTATAACATGCAGATATGGTAACGAAAACCAAAAAATTATAA  
ATAAGAAAGAAACCTATAACATTTCGTTTTGCAGCCGTGGTAGGCTTGTGAGAACCCGATAACGCTCACGT  
ACCTCAGGGAAACAGTAGGCCAAAATAATCAAAAGGGTCTCTATCCGAAAGCGAGGCCAACAGACTATGAG  
CTAGTTTTTACCAAGATAAAACTTGCTGTCTATCTCTTGTTAAACCCTACATATCTCTCACAAATAGAA  
AATGAACCTAAGAACTCTTCTATTCTTCAAAAGGCATACAATTTAAATAGCCGGACTTAGCGCTATGAAT  
TTATGTGTAATACAAATAGTGAAATAGGTGCTTAGAATCCTCTGTTCTCGTAGGCTAGATGAATTATGAA  
TCTAAAGCACGCGAGTGTGGACGTGACATAAAATAGCATGTTGAAAAGATTTTTGAGAAAGGATGCACGA  
CCGTGAGATGTAATATGACCAGACACAGCGAGAAAGACAGTAATGTTTTAACATAGCGTACTCAACCTTT  
GTTTTATATTATGATAATTTCATGTTAAAGGCCAATAAATTACGGGTGTAAATTAATATTGCATTCAATAAC  
ATAATGAAGGTGAGTTGTACATTCTGTAGCAGCGAAGTTAAGAATTATTTTATCAGGCTTTTTGTGCCGC  
TTCGAATGTGTTACAAAATGGTGTAAATTCCTCCTAAACTGTCTGAAAGCGTTTCAGTAGATGACACTG  
ATATAACATATGTGCTGTTTGTCCGTCTATCATATGAATATTTATCGTTGAATGACTTTTGGTACAGACG  
GACTGTGACAACATAAAAAATTGAGACCTGTGTTCTATATTAACCTCCTATACTTTTAGTAGAAGTAGATA  
ATAGATCTAATGATGCACTGTGCACTATGGGAGATCAAATAAAGCGAGCACACGTTCTGGGTGTTTTTTT  
TTCTCCCTAGTCTCTCGTGCCAACTGATTGCCTAGCAAGCTACCGTGACATACGTTTTCCCGATCTAGA  
AGTCAGTTCCGAGTCGGCCATCTACCGTAATATGGGATTCAAACCTAGGCCGTGTCGAGAAAACTCTTG  
GTTTTGTTCTTAAACGCACATGTTTGAAGCTGGCGAAGTTCAGAAACACAATAGTTGAGATCTCTTCT  
TTTTTGGCTCAGCCGGCGAGATGCATGTGACGAATGTTGAGGAGTGAAGGGGAGGAACCGCGTGCAGATC  
CTAGGTCGCCACAATTTTCGTGAATAGATCGCTCAAACGTTTGTATGTATGTGTACGTGTGTCTGATCA  
GTGAAGTTTGTAAAAAACTTACACCGCTCAGCTTTTGTCTGCTTGGCTTCGTTGTATCCTCGAAGCCAGC  
GACGACCAAGTAGTCCTCTCCTCACCTGTATCACAACAAAGAAATAAGCTTTTCTCTCCTCATGTTTTCT  
TGGGCTGAACCTCTTGGTCTCTCCCCAATTTTCTGTTTAAATTTCTGATCATATGTATCATATTCCTTATTT  
TTCGTTTTATATTGTGTTTTATATATATAAAACACTTACCACAAAATATCTCAAACCAAACAGGAGATTAT  
TGTTGATGCGGTACACGCCCACTAGGGGTTTAAATTACCATTTCAGGTAAAACGATTTGCAAAATTACGAA  
ATTTACAGATTTTTTACAACGCTATACCTTTTGAGATAATTTTCTAAAGAACCTCACTCTCGCCAACTTAA  
GATATCCGACAAAAAGTTCTGCCGAAGAACAGCTTTAATCCTGTTTTCTATTGACTGTATCTATACAA  
ACCGTGACAAAAAGGTCTGTAAGTTTTTCATGTTTCGATACGAGGCTGCGAAAAGCAAATACTCTTAT  
ATAAAAGCACACAATGTTGACCATTTTAAACAGCTGTATTGATAAAGCATATCGATGTTTTCAAATAGTCG  
CACAGTTCAAACCTCAGTAAGGATTACTGAAAAGCGTAAATAACAACACTAAGCAGAGATAACAATGAACC  
AAACACTACAAAACATGAGAATTTGTTGCAAAAACAGTCACCGGATGAGGTTTTAACC CGGAATACAATAG  
ACATATTTAATGCATGCCGAATATATTTCGTGTGTTTGTACACACGCTGTTTACAACGAGCTTAAAACT  
CCTTGAAATTGTTTGTGTCATTTCAGTGACAAACGTAATACTAAAGAGGTTATAACATAGAAAAGATCGT  
AATTGTAAAAATCCAACATACAAGAAGGTATATTCCATAAGATAGGTAAGAAGGTAAACATTACAATTT  
ATTTTCCGATGACTTTTATCCAGTACCTTTTTACAATAAAAATTCTGTGCGGTGTCCTCAACCATATTAT  
CATGATATTGATAAATCCATAATTTTGATTTGATAAATCCATTATTTTCACTCTTGAAAATATAAACTT  
ATCGTAATTTTTACGATGGATTTACTATCCTTACTGATAACAAAATGCTTTTCATTTCGTTAACATCATGTT  
GCATTATAACTAAATAGAAAAATATAAAGTTGTGTTATAAACTAGAAAAATATAAAGTTGTGTTATAAA  
ACTAGAAAAATATAAGTTAAAGAAAAATCAACAATCCAGTGAATCTTTTCTTTATAAGAATTAGCATAAAA  
ACTAGGAAGTTGCTTCTACAAGAGTTTCATGGCTTGGCATGGCCAAGTAGTTTAGGTTCTCGACTTGTAAT  
CCCCTATTTCGTTGGTAAAAAGAGTAGCCCCAAAAGTTGGCGGTGGGTGGTGATTGACTAGCTGCCCTCCCT  
CTAGTCTTACACTGCTAAATTAGGGACGACTAGCACAGATAGCTCTCGAGTAGCTTTGTGCGAAATTCAA  
AACAAACAAACAAACAATTTTTTCGCAAAATATAAAAAATCAAACAAAATAACAAGTGTTCCTTGTGATG

AAAGATTCAAGTAAAAATTACACTTGATAAATAAGGGCATGACAATATTATTAAACAACGAGTCGGTGGAT  
ATTACGTTTTTATAACTCGTGTAACGGAACAACCTGTGTTGATAAGAGAAAAATTGAAATATCATGCTATTGA  
TGGATGGATACTGCAGTATTAATAGTTTCATGTTTTAACTGAAAACATTATTTATTTTAGAAACATGTAT  
ACTTTTATAGTTTCAAAACACACAAGTACGTGGGCTACATTTTTTCCATGCTCACTCTCTGATATAACAT  
TTTCCCCAGCGGCACAGCAGTAACCTCTGCGGACTCACACCGCTAGAAACTGTGTGTCAATACCTGCGGTG  
GGTCCAGCTTTGTGCTTTATTCCAAAGAGTCAATGAATCTGGTATAAAATAATCTGAGTGCATTTTGACG  
TCTAAATATAAATTTATGGGTAAAAAATAATACCATGTTTGAACAATGTTTGAAACAGTAACAATCTTCT  
TTGATATGGAGTATAAACATATTCGATCAGCTATAAGGTTGGGGATTAAAACAGATAACAGAGAGAGTTG  
CTGGAGAGGCGCTTGAAGACGCCATCTATAGAAGAATGTACGAGTTTTGTTGTCTATTAAAGTAGCACT  
GGTTGAGGCTGTTACTCGGCTGTGAGAGGATTACGGGATTTGTGTTCAACGAGTTGATTATCAGATGAAA  
TTCTGACCTATTTCTTTAGAAAAGAAATGGAATCAAAGACAAGCCGGCGCCCGCTCAAGCTAGAAGACT  
CTTTTTTCGAAAAGATGACATTTCAAATAAAGCTTCGCACGTGATTATTGGGAGAACGACCCCCGACCTC  
AAGGTCGACCATACTTAATATGTATTAAGTTTATTTAGCTAACAGTTTCCTTTGATAATGCCTTAATTAT  
CCTTTCCTATATCCATCAGAACATATGTGAGACCTAATTACTTGTTTCAATTTGAGGAAAAACAACACG  
AGTTACTCGTTAGGACATTAATACAAATGTTAACTCATGACCATCGTCATTAAACATTAGAATCTGTATT  
TTAAGCCCACAGTTGTTGTTTCTTTGGAATTAAGCACAAAACCTGCACGATGGGCTATCTGTGCTCTATC  
AACCGAGATTATCGAAATCCAGCTTCTAACGGTGCGAGTCCGCAGACATAACGCAATTTACTGTGTTGAT  
ATGGTGGAGTCCATAGTTTGAACTTTTATGTTACGCTTGATTTTGCCGTACTGGTTCACATGGTAGCTG  
AAAATATAAATGGTACTCAGCAAAGAACTGTGGTTAAAAGTGTAGTCTTGTTGACCCGTATCGAAGGATG  
AGGTTTTGTTGATTTTTATTTCAAGTAGATCGGCCACATGATATACATAAAGCTCGTTTTCGTTTTTGTAC  
ACCTCTCATAGCTTGTTTCATGAGTGTATGTAGTAATAATAATCTTAAACTGTCTGTTGTATGTCCATGT  
AACTACTATCTATGTAAATATAATAGTGTGTTGTATGTTTCATGTAACATAATCTATATAGATATAACAG  
TAATGTCTGTTGTATATCCAGGTAACACTACTGTCTATATAGATATAATAGTATTGTCTTTTGTATGCTCAT  
GTAACATAATTCGCAGTGTGATGGATCTTATCAAAACAGGTTTGGAGCTTTATTAGGTACATGCGTGGTT  
AGATACTACTTTTTCAATTTTGTATTTTGTATTTTGCAGTTTTTTAGGGCGTTTTTGCATTTTATTATCCC  
TTTCTTCACTCTCTGTTGATCGACCTTTACCAAATTTGGTATGGAAGTTTATTGGGTACACGAAAATATG  
CATGCTAATTTTTGGTTTCACTTTTTCTTTTTCTTGAGTTTTTGATAAGCGTTGTTTTACAATTATGTGTA  
AGGGAAGCAACTTTTTATGTTCTAAGGTAACCTTTAGTAATCATGATGTTACATAACTTCCGTCCAGAG  
CCGGACAGGTACTGCAGCTAGTATGTTGCATTTTATAAAATTAATTCTACTCCATGTTACATAACTTCCG  
TCCAGAGCCGGACAGGTACTGCAGTTAGTATGTTGCATTTTATAAAATTAATTCTACTCCATGTTACATA  
ACTTCCGTCCAGAGCCGGACAGGTACTGCAGCTAGAATGTTGCATTTTATAAAATTAATTCTACTCCATG  
TTACATAACTTCCGTCCAGAGCCAGACAGGTACTGCAACTAGTATGTTGCATTTTATAAAATTAATTATA  
CTCCATCTAGTATAGGACAAATACGTATTTAAACCGTTTTTGAACCTTTTTGAAAGGTAAGCGGTACAGT  
GTCTCTGTGTTCTTATTCTGAAGTAATTGCACCCAGTAAACACGTTTTTAAACATATATAAAACCTTTCA  
AAGTTGTTTTTATTAGAATATAGTATCAAGATATCAGCTTGTTAGTTTAAAAGAGAAAAATAAATAAAGTA  
GACTTCTCGACTTCCAGGTGATTGATTTTCCCAAGTGATTGTAACCTTACCATTTAAACATATGTTTATAT  
ATCAGTTGATATTTATAAATAGAAGGGATAAACGTTTATTGTAAATTTAAGATACTGGAACCTCTATTCTG  
AGTGGTTTTACAACCCCTAAGAACTACTACAGCTGGACTTGGTTGTAAGATTTAGAAACCCAGCAATTTTA  
CTGTTCTATTGATATACGTATTAAGATCTTCTGTTTGACAGCTTCTGGTTGTTGATTATCCGGGAGGGTA  
TTCTCTAAAAGGGCGGCACCTTTAGAGATACACAAAGGGCAATTTTCTTGAGTGATTAGGACTAAGCAC  
CAGGGACCACTGATTCTCAATAGAATACCTCCTTCTTCTGTTTACAGCAATTATTGGAGGTCCGATAGG  
AACTTCAACACCAGACTTGTCTCCTGATGGGTGCTGTGGTAGTTGAAGGTACAGAAGAGCCAGTCATAAT  
TTTCGGATATCTCGACGTACAAATGACATCAGCACTCCATTTGGTTATAATTAAGAAAGCTTGTCCGAT  
TTTGGCTTAAGGCCAATGCTTTTCCCCAGTACTAGTCCTGACCTCTTTGAGGATTTACTAACTGAAAAGC  
TCATCAGTGCTATCTGCGTTCGGTATTTGTGCGTTGTGCGCGTGGCCTCCAGATCCCCGTGACAGTGAC  
AATAACAACCATAACTTTCTCGTTACAGACAATTTAAACAGCTGCTAGACAATACAATATTACTGTCT  
CCCAGCCTAGGATGAGCCACATTCATTTTATATTGTTAATTCAGCCAGACAGATTTGGATTGTTTTTATT  
GAATATTAATAGGTTTTTTTTTTTATGAACATTTTATTAACATGGAACACTTACTGACTGATAGAGCTCCT  
ATATTCAAAGGACATTTTGTATTTATGAAATACGAATACATACCTAACCTTGAAAAGTTGAAAAACATTAA

TATGTTAAGAAAAACCTGGAATACGCTGTACATCCTTTTTTATTTTTGCCAAATATAAAAATAAAATTGAA  
GATAGTTTCACCTGTAAACCAACTGTAATTTATTTCAGTTTCAGGTGTGTTCTCATAGTTTCGGGATTTCA  
CTGTAATATTTCTTTCCAATGAACCAAATGTTCTGGTTGAAGAACTTTTTTCATATCAATTTTACTCTTG  
GAACACCTTACCATGAATTCCTCTTTATTTGAAACAGATTCCATAGATGCAACTTCTGACGGAATTCAG  
AAAACAATTCGTCTGCAGATGAGGACTCGCAGCTGCGCATGCGTTTAAAGAGAAAACCTTCAAAGAAATCG  
GACATCTTTTACAAACGAGCAAATTTGAAGCTTTAGAAAAAGGTAAGAATTCATTTCGTACTGTCTAAGTCT  
TCAACTGCAAAAAAATAATTAATGTAGAGTATTTCTATTGGTCTATATTAAATGTAGAGTATTTATA  
TTGGTCTATATTAAATGTAGAGTATTTCTATTGGTCTAAACAAAAAGAATTAGAAATATTTTTCTTAAT  
TTTATTTTTTAATGTTCCAATTTGAGCTGTTGAAAGAAACGTAATATTCTAATGCACATAATTTTCATCTAA  
TTCCAGAGTTTCGAAAGAACACATTATCCAGATGTATTTGCAAGAGAAAGATTAGCTGAGAAGGTCACCTCT  
TCCTGAAGCTCGTATTCAGGTATATCTGAAAACAACAAAAAATAAAACGTTATTTACAGCACTGATGATG  
GTGACTGTGTACCAAACTATTAATACTATAAGCACCTAATGAAACGTTATATTCCATTGTTTTGTGTCT  
TTTGTTTATCTGCATATTGTGTATTTATATGAACTACTGGCATGAAATGTACAATTAAGTAACTGTTT  
TCACCGTAATCATTTGGTAAAAAGTAATTTAAGCACATAGATGAGAAATAAAACAAATAACTTAAACATT  
AGTCAAATCAATCCTGTTTAAACAACTTATTGATAGCGCCTAATATCGTAAGTCAATACAATCGGAACTT  
AAAATTTATAATGATTAGATTACACTGAAATATCATTTGGATATAATCTATGTTTCCAATAATATTTTAT  
GAAATTTGTCCAGCGCTGAAAATTGAGGTTAGTACTAAGTCCATATACTAAGTTAACATATGCCAAACAA  
TTCTCATAAATATAAAAAATAAATAAAAATACATTCTAATACAAAACGATGTTTCGTGTGTATTAAAAA  
ACTGAACAAATGCTGTCAATGAAACTAGCTTCAAAACAAAAATGGAATATAACATAAAAAAACTAGTTAT  
TCAGTCAGCTTAGGAAGTTTAGGCTAGTTCTACACCAATATATTAATTAACAATGCTAAATTAGAGTGT  
ATAGACCAGATTTCATGTAAAAATACAATAGGCTAATGAAGTTGAATAAGAGAAATTCATTGTTCTTCAAA  
ATAAGTTACCAGAAGCGAGGTAGTTAGAACTAACTGAGAACAAATGTTCCCGTTTGCCTCATTTATTC  
AGACTCATATTTTCGAGTATAAGTTTGTGTTGAGATAATCTAACAAGAGTCCAGAGTCGTTTATGGTTTAGG  
TATATTTGAAATCTACTTTTTTAACACGCTCTCCAGTTTCTAGCCACAACAGATATATTAGAAAAGAATAA  
GTGGTAAAACGAGCTAGCTGCAGTAACATGTTTTAATTACTGAACATTTTCCATAGTTCCGTGGTACTGA  
TAAGTAAATATTCATAAAGTCCCAAATAAAATTTGAATATAATTTATTTATATATCTTCATTGTCATTTG  
TGAAAGAGAAAACTGAAGATTTTTATTAATAATATTTATTTGTTTCATTACAAACATTCGTATTAAAAA  
CATCTATTTAGGTATGGTTTTCGAATCGTTCGAGCAAAATGGCGGCGAGAAGAAAAGCTTCGTAAACCAAAG  
ACGTGTAGTCGAACAACCAACAGGTACAACCTGTGCTAGCACCACCTAACGGACGACTTCCAATTAAATGGA  
ACCTTTTATAACTCTATGTATCCATCACTAGGACAATCGATGGCTGGAATGGGAGATTCTTACAGTTAG  
TTGAAATGCTACTTTTTTAACACATCTCTAATTTCTACCCACAATAGACAAATTAAAAAAAGTAAATGG  
TAAAATGAACCATATGTTGTAACACGTCACATTTAAAGTTCTTTTATCATAATTCAGAACAAGCATAT  
CAGATTAAAGCATCTATTATTGTGAAACACCTGTTAAACGTAGAGGTACTTCAGATGCAAGTAGGCTTGT  
GGTGGCCTAACTACTATCATTTGGCATTAAATTTTTTTTAAATTTCAATTTGTTTCAAATTAACACAAGAT  
GTTTAGGGCGCTAGACTCGTAATCTGAAGGTTGCGAATTCAAATTTACAGCCGTGTGGGCGTTGTAACGT  
TACGACCAGTCCCACTATTCTTTGGTAAAGGAGTAAACCACGTAGCGGTGGGTTGTGATGACCAGCTTTC  
TTCCCTCTAGTCTTACATGGCTAAATTCGGTACGGCTAGTGCAGATAGCTCTCGTGTAGCTTTGCGCACA  
ATTACGAAACAGACAAAACAAACAAATGTAAACGTAATTTTTGTTAACTAGTATTTCTACAGTTGTCTCTA  
AGAGTCCATTTGTGAAGTTTTTTTTTTTAAATATAGGCCCGGCATGGCCTAGCGTGTTAAGGCGTGGGACTC  
GTAATCTGAGGTCGCGGGTTTCGCATCCCCGCCGACCAAACATGCTCGCCCTTTCAGCCGTGGGGCGGT  
TATAATAAGACGGTCAATCCCACTATTTCGTTGACAAAAGAGTAGCCCAAGAGTTGGCGGTGGGTGGTGAT  
GACTAGCTGCCTTCCCTCTAGTCTTACACTGCTAAATTAGGGACGGCTAGCACAGATAGCCCTCGAGTAG  
TTTTGTGCGAAATTCAAAAATACAAACAAAACAAACAAATGCAACACGTAATTTTTGTTAACTAGTGTT  
TCTACAGTTGTCTCTAAGAGTCCATTTGTCAAGTTCTTTTCAATATTTCTTTGTGATTAGAAACCGAACG  
AATTATTTGCTACGAGTACAGATTGTAGGCTGATGCATGCGAGTGGTTTGATTTGCCACGTGCCATAGCT  
ATGACCTTTTTTAGCACATCGAACATGGGTACATGTTTACTCCTACTTGATGTATCTGAAGTTTTGTCTC  
GCGTTACTTCCCTTCAGCTCAGCTTAAGATCAAATCATAGTTGATACATGATGGCAAATCAAACCTCTTG  
TTGGCTTAGTATAAGTATTTAGGGTAACCCGACCTTGAAGATATATTGTCTATAATTATTTTGCATCAA  
AAAAGAGTACAACCTGTTTGTGATTAAACAAAGACTATATGTACCAAATTCCTCCCTATATATAAGCCTCAC

CCAGATTATCGACTCCTTCACCGATTAAAAAGTTACGGTTCTTGTTTATTATTAAACACAAAACCTACACA  
ATGGGCTAACTGTGTTGTGCCCACCTTCAAGTATCGAAACCCGGTTTTATTGCTGCAAGACGTATCGTTAA  
GTTACTAGGCAAGGGAGGGTCTTAGTTTATATCCAATATAAATAAGTTATGAATTAGGTAAAAGTAATTG  
TGTCTAATTTAATTATATTTAATTTTCGTACTGGTTAACAAACACTGACTATTAAATGTGTTATAATATT  
TAACTTAACTGTAACTTAAATTAACGCTGTTTCGGCCCGGTATGGCCAAGCGCGTTAAGGCGTGC GACTC  
GTAATCCGAGGGTCGCGGGTTTGCATCCCTGTGCGGCCAAACATGCTCGGCAACTATTATACTATTTTTTC  
GTCTTTTAAATTAATTAATTAATGTGATTTTGTGACAATGAATTTATGATTATGTGTGTGGTGTTTTAAAGTAAT  
ATTTCTGTTAAAAC TACTTTATAAGTTTCTATCTTATTGGTAAATCGATTATAAAAC TTTAAATTATTAT  
TATTGACTTATAAGTGAAGAAAAACAAAACCCGAAACTCTGTATGCAGATAGTAAGTATAAAAGAAAACA  
GGTTGTTTTGTGTTGTCTGTTTTGTTTGATAGAAAATTGTGACTACGTCATAAAAC TTTAGGCGCAATAGTT  
TACAAATGACTTCCTATTTTCGACTTCTAATTCCAATTAAC TACTACTTGTCAATCCTATATATTTACA  
G TGTACCACCACCATCCAGTATAGCACCAAATCATTGTGTGCAGCAACGTGATCCCACCTCTTACACCTA  
CATGTTTTCACGATCTGGGATCTTACTCACGATCATCTTGTACACCCAGTCAGTCAATTAACGGACACCCG  
TCTTACTCTGTTAATGGAGGAAGTACGCACGGTGCAG GTGAGTAAAAAACACTGTGATACACATATTCAC  
AGAATACACACACTCACAGAATTAATTTTTTTTATTTGTGAAAATATGGCATAAACTTGAGTTTATATTGT  
TAATACTAAACTAAGTAAATATAAGTATCAGAAATTAGATTACATGAAAATAAAGTGTAATTACACTGCT  
GAGTGCCGAGAGGACAATGTTTGGATAAGACTAATTGTATATACAGTTTTATTAGAGTAGTATAGATGTG  
TTTTATACACAAGCTCATACATATATATATATATAGTAGTTTTTAACACGCAGTTCCTTATTATTCAGG  
TGTAATTTCTCCAGGCGTGACCGTTCCTCTGCAGGTACCAAGTCAAGGTCCTGATCTCTCAATGGCTACA  
AATTATTGGCATCGTATTCAG TGACCTCAAAC TTTATAGAAACGACTACTATTTGTTAATTGTACCTTTAA  
TGTTACAATAAAGCTTTGGTTAAGCTCGGCTATATAAAAAGCGTTTCTTTGAACAGTGGAATAAGGCTTT
