# Supplementary material for: Evolutionary Conservation and Diversification of Five Pax6 Homologs in the Horseshoe Crab Species Cluster
Source: MDPI journal article supplement (doi:10.3390/arthropoda2010007), 2024-03-04
Supplement: s1 [file s1]

>CM024338.1:78010410-78086639 Tachypleus gigas isolate IMCB\_SINCHF\_001  
chromosome 1, whole genome shotgun sequence

GGAGATCCGCCCGCAGCTAGGCCTAACTCTCGTTCTGTTGGCTTCCCGAGTCTGCAGTCATCACCAAAG  
**ATGCCACACAAAG**GTAAACATGATAACTGCATGGTGTCTTCTGATGTCTTAGTTTGTGCATTTATAAAGG  
TTGTCACTCTCTAACCTTAAGGAGTCAAAAGAACATTGATACTGGTGTGATGGTAGTTTCGTTACATTA  
AACACTGTCGACGTACGTGGTGGCAATATGGTCCGTATAAAACACAATTCTTAATGTAGTGGTATTTTCG  
TCTGTACGAAACATAAATTCATTCTTGATATAGTGGTACTTCCGTCCGTATAAAACAAACAGTACTTGAT  
ATAGTGGTACTTTTCGTCAGTATAAAACACAAATAACACTGGATACGACGGTACTTTTCGTCCGTATAAAAC  
ACAAAGATCACTGGATGCGATGGTACTTTTCGTCCGTACAATACACAACTGATTCACTGAGCACAGCATT  
GAAGGTATTCCATTTTCTTAAATGCAGATGTGAACGAAATAAAATCAGCCTTTAGTTCCTGCGTCAAAAT  
GAAACATCTAACTTTTCAATGTAGGTCCACATGTTGCACAGTTTCAGCACAGAAGAGATAGGGGATTAAA  
GAAACAGAAAAACGAACAGTGTGTAATCGAGACCTTTCAACATGGGGGATTATGATGTGAAGCTGGAAAG  
AAATTATTAGTATTACAATTCAACAAAACGGAAAATACTGTATTTTCAGATGAGATTTTTGCGAAGAGGAA  
AATCCACCGTCGCCCCCTTAATTCGTCACTGTATACAAATAGACAATAATTAATGGCGTGGTTGACTAA  
GAATGTTGATCAACCACCAATACCAATTATCACATGCACTTATATCCAAACACTGAAAACGTAGTTACCC  
AATCCACAATAATATTATCTTCAAAGAACATCTAAATACTTTAAAAGCAAGTACATTTTTTACACGTGCGA  
AATAAACGCAAAGCCTTCTATACGATATAACACAAAAACAACCTTTTAAATCATTTTGTATACTGGTTATA  
TATTATAATCGTTTGTCTCGCCTAAATCGTATAAATGTTTACTTACGTATTACGCTCGAGAGCCAAATATT  
TTGTCAAGAAGAGAAAAACGAAACTCGTCCTTGTATGTAAAGCACACGTCTTAAGACCATGGTTCACACGT  
AAGGCATCCGAAACCAGTACGTCCAACCGTCCAATGTGACTCTATTTTATGGTATTCGATCACACATGA  
ATATTGTATATGTATTTACCGATGGTCTGCGTGTATATCATATCGTTGCAAATAGAACTACGTGTATTTA  
CGTACAAGAAAGCCGTATTGATATCACACAATGTGAATGTATATATTATTTAGTCATTTTCTAACATCTA  
CCATTGTTGTTTTGGCGCGTTTTCAAAGGACTGCTCGAACAGCAGTTGCTAATATTTTTCATTCACTATTT  
CTGAAGAACATTTTAATCCGCTGGGGAGCAAATCCACATCAATAGAACCGAATTCGTGTTTTTCGTTTT  
TCTGGGGGAAGGAGGTTAAATATTGAGAAGAGGCTAATTTTTGTCTACTTTGAAGAGTGGTCACCTGCAC  
TGAGCTCTCCTGTGTGTACACAGCTCAAACAATGTTCTGTCAAATAGAAACGTTCTTTTTTAACTTTTCG  
ATGCTATTAGTTTTCGCGCATAGCAGGCTATTCTTTGTGTGCTGTGGAGGTTGGACCACAATTGGATTTCA  
AGAAAAATTAAAGCACCGAAAAATAGACAGGACTATATATATGCATGCATTGTATGCCATGTTCAAATCCC  
TTCGTAAATGTCTGTTTGTAAAGGAATATGTAATCCTGTTATATACAGATAAGCGAAAGAGACACGTAAG  
TAAAGAAACGTACTCTATCTCCCAGCATGGTAAGGTTAGTCGAGATTTTTTAACGCCCTTTCTTACTGCG  
CGTGCTTCTATGAACTTTATCATCAGTCATACGCGCCCATGATGGTTTCCAGCGAACACATTCTCAGTGC  
GCGGTTCTTCCAGTAGCTCGTGTCTCGTGACCTCGTGCTGTACATGGAGGACTATGTCTAGATGGGCAT  
TCACACCATTGAAGGTGAGGTTTTAACGAGATCTGTTTTACGTGTAACCAAGCTTTTGTTTTTATTGTAT  
TACGAGAAATATTTAGTTTCGAGTAAAAAAAAGCCAATGAATTTTCAATTGCAACACTTAGAACATATTC  
TTATGTCACTAGTTTCTATATTAATAATTACACGCACGTGCTATCGATCCCTAAATGTTTGCACCTCTCT  
TTAAGATTGAACTGTTTCTCGTACATATTTTAAATTCATTAAATCACAACAAATATCACTTCATGACAG  
GAGTACCAGCACACTAAAAATAACCGTTAACAAACCACTTGTCACTTGGTCTATTGTGTTTATGTATATAT  
AACAAATTAGAGAAAAATTATTCTAACTCTCAAAGAGAAGTCCTTCCTACACGTGTTAACTACAGAATGT  
AAAATAGGCTAAAGTTTAAAAAATTCAACTTTTATTTCGAGTTAAAGGGCCTTAAGCAGGCAAAAGCAATAT  
CAGACAGCACGTAACGAAGTACGAACAAGGTAGAGAAATCTCAATACGTATGCATAAGTATCAATAAATTT  
TATTTTTTTCTTACGAAAGCACCTTAACGTGTCTATTTCTAGATAAAGTGGAAGCTGGTAAATGTTTATTT  
AAACACGATAGGCTGATTTAATAAGTGCTTACTTGCTTCTTTATTTCGTGTTTTCTCTGAGTCAGTTTCTT  
CGTGCGTTGCTATGCTTAGCTATCAACCTTGATTTCGAATATATGCTATTGGCTTAAACATTCCGAACAC  
AATGTTTCGTCTTATTAAACAGCCAATAACCACTTCTCTTAGTAAGCTTCTCTTTGTACCAGTTTCTAATAA  
ACCGAATCACATTTGCTCAAGGTTATCACAATTAAGTTTATGTTATAAGGTATGGTTTGTGTTTGTGTTT  
TGAATTTTCGCGCAAAGCTACTCGAGGGCTAGCTGCGCTAACCATCCCTAATTTAACAGTGTAAGGCTAGA  
GGGAAGGCACTTAGTCATCACCACTACCGCCAACACTTGGGCTACTCTTCTACCAACGAATAGTGGAAT  
TGACCGTCACTTTATAACGCCCCCACAGCTGCAAGGGCGAGCATGTTTAGTGCGACGGGGATTTCGAACCT  
GCGGCCCTCAAATTACGAGTCGAACGCCTTAACCTAACTGGCCATGCCGGGCATAAGGTATGGTTAATTC

GTAACCAGTGCCTTTTTTACTAAATTAACCAGGAAATGAAAATTCATGATTAGAATGGTTTGCCATTTT  
TAAATTCAGTAGCATACACTTTACGCGAGTCAAATTTGCTAAAATCAATTTCAATAAACGTCTTTGGTTC  
ACTAATTATCGAAATTAAACAATTACGTTTCCATAAGCGCTTCAAACGATATCATATGATTTATATTAA  
CAGGTTAACAAAATTAAAAAGTTACTTGAGATTCACATCTCGTTTAAGTATTTGTTTAATATGTGGCCCT  
ATCTTGTTACCTTGACACTTACCCGACGTCTGAGATTCACTTAATTTTGATAGCATGTAATATTCAAAT  
TCGGAGCTCAATCCCTGCAGTAGCACTGCGACAATAGTTCACCATGCAACTTTACAGAAGAAAAAAGCG  
AATGAAACAAACCAAGATAATAGCCAATAGTTCATTGGTTAGAGTGTCTTAGAAATTTTATAATTTACG  
TTTTCTTTTATTACGAATAGCCAGACTTTTTATTTCATGAACCTATGTGTTAAAAACTCATCACAAACGAG  
TAGCTATAGGGATTCTTAATAAAGGAAAACGTAAACATTGGTTAGAGTGTCTTAGAAATTTTATAATTTA  
CGTTTTCTTTTATTACGAATAGCCAGACTTTTTATTTCATGAACCTATGTGTTAAAAACTCATCACAAACG  
AGTAGCTATAGGGATTCTTAATAAAGTTTAAATAGGCCTTGAACATGCTTATAAATCAGGTTGATACTACT  
TGAACATATAGTCCTCGGTGGACAGAACGAAGGTGCGCCATTGTATAGTTTTGCGTTAGGAAAAACACAA  
CAACTGACCATTTACGGTCATTTCCCAAATGCATGCCGGTACGTTAATGATGAAATGACAGTGAATTATA  
TTTTCTTTTTTAAAGTAATTAAGAAAGGTGATCAGGAACAAATAAACGTGAGTTTGTTTTAAAAATTGTAT  
AATAATAGTAATGCCTACAAAATATTAATTTTAAAATAATCATAACCAGAAAAATAAAACCGAACTCAGT  
CATTCCTATTTTCTCTTCACACAAACAATTATATTAAAGAATCATTTCTTCGTTTCCAGAGATCGGAAAC  
TGTAATTATTGGCGCGTTTAAAACTACTTGTTCTTTTTTTTTTACAATCCGAAAACCTATAAGATAAAC  
TTAAAAAAGGAAACGTTAAACAACAGTCTTTCTCTGAAAAGGACTATTTGTGGATATTGTATTCCTTAT  
ATCAGAACCCTCTTATAGTGTTCTTAACCGATGGAGAAGGACTCTGTGAATCAGTGTTTCTTCAGGC  
TTCCGCATGAAGTTAACTACATATTTTCGTAGCGTAATTACTTGTAACTTTAGTACCTTCCCCAACT  
ACATTTAATTGTATATTGAAGTTAAAGCAAAGATTTCCATTTTAAATGGAGTTTGTTATTTATTTTGATAT  
CATTGAATAATAGGTACTAAAGCTGACAAACATTATCTTGAACCTTACATCTTTTGATGTTATAGAATTT  
TTGTGCGGGTATACATCCTTTAGTCTCTATATATTATTTAAAAAAAACCTTTGAATTTGCGCGAAAGCT  
GTTGTTGTTTTTTGAATTAAGCACTAAGCTACAGGATGGGCTATCTGTGCTTTGCCACCATCGAAACCG  
GTTTTTAGCGTTGTAATCCGCAGACATACCGCTGAGCCACTGGGGGACTCGCGCAAATCTAAAGAGGGC  
TATCTGCGCTAGATGTCTAGTTTAGTAGTGTAAGAATAGATAGAAGGAAGGATAGTCATCACCAG  
CCACTGCCAATCTTGGGCTACTCTTTTATCAATGAATAGGGGGATTGACCGCTACATTATAATGCCAC  
ACAGATGAAAGGCGAACATGTTTAGTGACGGGGGTTGCAACTTGCGACCCACAGATGTGGAGTCGAGC  
ACCTTAACCACCTGGCCATGCTGGGCCTTTCAAAAAAGGAATAAACTTAGGATCTATGTCTGATATTTA  
TGTTTATGTTATTTTTTATGTTTATGTTATTTTTATGTTTATGTTATATTTATGTTTATGTAATACTTAT  
GCTTATGTTATATTTATGTTTATGTAACACTTATATTTATGTTATATTTATGTTTACGTTTACTTATAT  
TTATGTTATATTTATGTTTATGTAATACTTATGTTTATGTTATATTTATTTTATTTAGTTAAGTTTCAGC  
TGATCTGATACGATTTGAGCTAATCTCATTTTCTTTCTTGAGGACTGAGAGTCACCTAGTGGTTAGCGTG  
AATCTTTGAGTCAATAGTTCGAGTTCGGTTCCTGCAACATTGCACTTCTGACGTTGGGGATGTAGATTT  
GTTATAAGAGTGACAGAAAAATCCAACGATTTGATTAGCTGTCTTTCCTTCAGTTTATAAATTCACAATT  
AGGAATACCTAGCACAGATTGATCCTTCTATAGCTTCTCACAAATATCTAAGACAAACATTTTCTGAGTC  
GTACAAAAAACACAGAAACATATAATTTTCTACTAAGTAATCTCTGAGTTGTTGAATTAGAACAGTAAA  
GTGAGAGATCCGATTCCCCGCAATAAACCGAATGCTAATGACTTATTGTGTAGCTTTTACGCTGAAACAA  
ATAACGCCCTAATTAACAAAAGTAAATTATCAAACTTTTGAAAGAAGTCATGAGTTATATTTTTCAGTATC  
TGAAAAAGCATGACAACTTTTCCACAACAGTTTATATCTTATGAAACTACGTGTTTAGTTGTTAGGTTT  
AATCGTCCCTCAAATAATTCAACATAATATTTTTTGCGGTTCTAAATCCTTAACACTAAGTTGGTTGTAT  
CTTAACATTTTGAATAAATTGAATAATAGTTGTTCTTAAATGCAATAACCTTATAAGTTTCACAGAA  
CATGAGTTAAACATTTTGTGTGAGTGTGTGTGTGTGTACGAAACATTTTAGTCGACTTTTACTTGTT  
CGTTGTGAAAAAACTTGTAATATAGATGAATGTTAAGGTACATTTTGTTGAACTAGCTTTTCGTGAG  
TTCTGGTGTTTCTAGTTATTTTCTATTAAGTAACGTATTTTCAAGAACTTTATTCATTTATATAATTT  
TAGGCTAATTTTTTGTATTATTAATTTGTTTGCGCTCAAAGATAAGGTCTTGGGTAAATATGCAGCTTCG  
TGAACATATCACTGGCATCAGCTCAAAATATTATAGAGAAACAATAATTTAGCAGTTATGAATATATGTC  
ATTTTATAAGAAATGCGTCAGACATAATTATTACATATTACGGTTTATTGTCCTTTAAGAGAAATATAAT  
TAATTTATAACACAAATAATTATGAATTGTGTTAAAGATTTGACTTGTTTAAATTTTTCAACAGTTCAAG

TTTTATTGTGTTTTTCGAAATGTCTTCCAGAGCTGAATTATGTAGTAAAATATAAAGAGAGAGAGAGAGGG  
GTAAATGGAAGGTAAAACGAAAAATATATTTTTATGATATTGTTTAGCCTTTTGGTAAATTAACAGAAAGC  
CCCTGTAGATTATATTAAGTATTTAATCCTTATGGTTAGTTGTACAAAAACTGCTAGAAGCAACTTAC  
GTTTGGGGCTTGACGTGCGAGACTAAAAAAATTCCTGCGAGAAGATTAGGCCTACATATATATGACCCAT  
AACATGCGAATGGACAAGAAAGCTTCTATTGGCTGTACATTAAGTACATATAACTGACGCCTTATGTCTG  
TGTCTACACTTTTTTAGATTTTGACCCGTGTCGTCCCGGGCCACTTCGCCAGTCGTCTGTCTCAGATCCA  
GTTAGTTCGATAATGACATTTTCTTTTACATATTTTGGGATTGTAAAATATTAAACAATATTTTGTTA  
CTCAAATGAAAATATTTACAGACTGGTTTATCTGTTTTTTTTTATTATTATTACGTCTAAGAGATAACGTG  
TTTTTCAGAACGAAAATGACAGCCACATAGATTAGACGTAGCTTCACTAGTAGGCCTAAACTGTAATTAA  
CACGTAACACAAGTGGTATCTCGTGTTATTGTTTATTTATTTCTAAAATTACATGATTTTTTGAAATGTGT  
TTAATTTATAACGATTTGAATGATATCCGATTATTTGGGAATTTACTTAACGATTTTATCTTCAATTGAA  
AGGATTGAATATTGTAGATATGTTTTCCCGAATAAACCACAAGGTCTGAAACGCTAGTTGTGGCCATAAA  
GGTCTAACTAAGAAAATTGCCAAAGTACAATATAATAAGTTTTTACAACACACTCGGATAACATTTTA  
AAAAGTGATTTTGGTTTGTATAACCTAATTTTATAAGAGATTAAGTACAGTGTTATAGTTCATGCTTT  
ATATTCGTGTGTTAACAAAGTTTTAGCGAAGTAATTTCTCAAATTTTTTTCGGGAACATATACTTTACT  
TCAGTATATGAGAGCTAAGTTTCATTAAAATTTCTTCTACGTTTCACTGTTTACATACAATGCTAAGGCTTT  
TATTTTTTCTAGTTTGTAGCATTATTCAGTGAATGAATATCAAAGCAACAACACTCAAAGTTCTTTTTTTT  
TGGGGGGGGGTAAACGAGTACAATTAAAGGATGAATTATCATGAACAAGTTATCTTGACAAGTGGACAA  
TATAGGACTTCAGCCAGTGATAAAGATTCTTAATTTATAAACATTAATGTCTTTCTGTCCATGTATTTTT  
TTATTTTTATTTTTTACAAATTGGCCAAACAATTAAATTCACAAAAGTTCAGTTACTAAAGAGTGTAGT  
GTATTTGATGTAATGCTACGTACATTGTCCCGGCATGTCCCCACGTAGATTAGACGCAGCTTCCACAAGTA  
GGCCTAACTGTAATTAATACGTAAAACAAGTGGTATCTCGTGTTATTGTTTATTTATTTCTAAAATCAC  
ATGCTTTTTAAATGTGTTTAATTTATAACGATTTGAATAATCCGAGAGTCGAGGGTTCGAATCTCGGTG  
CACCAACATGCTGGCCCTTTCAGCCTGTGGGGGTGTTATAATGTACGGTCTATCCCACTATTCGTTGGT  
AAAAGAGTAGCCCAAGAGTTGGCGGTGGTGGTGATGACTAGCTGCCTTACCCTCTAGTCTTACACTGCT  
AAATTAAGGACGGCTAGCATAGATAGCCTTCCAGTAGCTTTGTGCGAAATTCAAAACAAAACCCACTGTA  
TTTTTTTTGTGACAGTCTTGCTGCCTCAGCACTAAGTGCAATAAAAAGGGTGACATGAGTTTGTATTGAT  
TCCACAGGAGTCGTGATACTGTATTTGATTTAATGTTCCATTTTTGTAACAGTTTTGTTACGTTAACAGT  
GTGATAAAGGATACAACAAGAGCTTCTGTTGACACTTGTGCTCTAAACAAACGAGCAGAAAAATTCAGGTT  
AAAAAGAAAATATTTTATTAATCCTGTTTAAATCAATTTACACACAGAAAAATATATTTTTTCCACCATG  
AGCAAATATTAGCTTTTTAGGTTTTACATTGTGAATTAAGTATTTCTGGGTTGTTGTTTTTTAATGGAAT  
CCCGCTAGCTATTTAAACGCTCTCCACAACCTCAAATATGTAACAAAAATATCCTAAATATTGCTATTAA  
ACTGCTAATTTAACATTAAAAAATGAGTAATATCATTCTTCTAATACATTTTATCATCGGTTGATACGACC  
TTTGTAACATACAAAAACATACAATTGCTTAATATACTGCTATATGTGGACACTATATATTGAACAATAC  
GCGTACATAAATGAAAGTCAGCTTTTCAAGTTTAAAGTTTACTTAGAACAGAAATATTTATATAATTTTATG  
ATATACGAAACAAAAAGTAAACGAAGGTCTTAAATTTGTAAACACTGATCATCAGAAATTTTCGCTTTTAC  
ATCAGTTTCAAGGTTTTTATAAGCTAAATGTAACCTTATTGTAACATTTGTTTCGTATATGTTATGCGTGT  
GTGTGTACTTTTAGAGTAAATCTTAAACCAGTAAGATATCACGTTTTCGTGACGTCATACGGTTATCAGAAT  
TTGTTCAGCCAAATCTCGACGTTTTTCTCAAATTACATTAACACAACAAAGTAATTACATCGAACAGGATA  
CGTTTTTAGAATATTATTGTTTTGAAATCTCGTGTTACAGACTTGGTGAAGTTTCCCAGGCGTTGATAGCCA  
GTAATGTATAATTTCCCAACCTACTATACCTTTGGTGACTGTCTGCTCAACTAAGTTTGAAACAATTTA  
GGGAATATTTATGAAGCGGTCAAAAAAATATATGATATGATTAATTGTAAATGATGATATGATTTATA  
TCAGTGCTTAGCAGAAGGAAAGTTTAGACGTGCGAGGGGATTTGTTTGTGGGAGTCGGATGAGGTGAGCA  
AGGTTAAAAAAAATATAAAAGTCCAGTAACAAATGATGGTCCCTCGAATATTTCTGAATATCTATTGTT  
AGAAATGACGGCATAACTAGAAGTATCACCTTTGTAAACAACAATTGTACGTGCGCGCGGGAACTTTCAC  
GCGCTGTTCCGTCGCTAGCTACACGTGTTTGTGTGCCGCCTATATTCAACCCTAAAGCGAGCGCTGTTTC  
GCGGGCACTTTCCATTGTTTCAACAGCAGCTTTTTTCAAAACCAATTTTAATCTATCTGTAGCATTGACA  
GAAGATATCTTTATTGAATCGTTTTTACCCCTCCTCAATGAACCTGGTGATGTTTTAGTTCGTTGTTAAT  
TGTTTCTAAGATTATCGTTTTTTATTAATTCTTTCTGAAGCGAAGTTGCCTCATAGGAATCGGCGTTTCGTT

CAGTCTGTGATAGAGAGGAGGCTACTTTATTGGATTATACCGTGAGTGGCCCTATTAATAATAACTACAAATAAA  
 GCAAAATATATCACACTAGCATATTTCAACCTAACAGAACTATATGAAGTAACTTAGAATTTTCAACAT  
 ATTTTATATCTAAAAAACAACAAACGTTTTTAAATATTATTAATAAATAGTTTTGATCGAGTTCTCTAA  
 TTCTGACGATTTTTTTGTGTGCAAAGAAATTATTAAATATATGAAACTAATATTTATCGGGGTTTTCTATTC  
 CTGTTAAAGTTAATGTTTCGATGTGCTCAATTTATATTAGAGATTTTATTATTGCTTTCTGTTATTTTTT  
 TTATTACTGTTTCGAGGCCCCCGAGTGGCTCAGCGGTATGTCTGCGGACTTACACGCTAAAATCCGGGTT  
 TCGATACCCGTGGTGGGCAGAGCACAGATAGCCCATTTGTGTAGCTTTGTGCTTAATCAAAACAACA  
 ACAACTGTTTCGAGATTTTTTTTACCTTAGCATCTAAAAATCGTTCATGTTGCTAAGGTTTGAAGTATC  
 AGTTACTACCCTTGATGTTGCTAAAGAAAACCTGAATTTATAATACCATCTAATACATATAATACGTAT  
 AAAACCTACTTTTATATTTTAGATTATTGAGTAGGATGTTAAACATTGAGCTTTATTAATACATGTTCCAT  
 AAAAATATAGTTTGTAAAGTATTAAGTTTTATGAATTATGAATTAAATATTCCTAGTTTTTTAATTTGAA  
 TCCTGCTGGCTTTTTTAACATGTTTTTTTTTCTGAACAATTTATGCGCTATTTTTCTTGTTAGATTTCGCGA  
 CTTTGTGGTGCATTATCCCTAATTACATACGAGACAATCCTAAATATGTAAGAAAAATATCCTAAATAT  
 TGCTATTAAATCCATTAATTTAACGTTAAACATGAGCAGTTTTATAACGTGTAAAATGACACATTTGCCA  
 CAACTAAAATATGTCGTTAAGGAACTTTTTCATCAATGTAAAATTAAAGTTTACTTCAGGGCTGATCA  
 TTAATTATGTCAAATACTAACTTATCATACATTGAACGTGAGAATTTGTTGTAACAATTTATGCCTTGGT  
 TATGCTCACGCACTTAACGTGGTGACTAATGGTGTACCTAGTCTTCCGGCAGCTCCAAGTTTCCATGTG  
 GTTTATGAATCATCATTTGGAGATGGACTATTCTCTTTGTTACTCTGAAGACGAAAACGTGTGTATGTCC  
 AGAAGGGCTGATAGATCTGTCTATGTTGAGTGTATATTTTGAGTGTATGTGTGTGTATGGATTATCTGCTC  
 TCTTCTTTTATAAAAAATGTAGACAGGTGGTATTATTTTAACTCATCGAATGCCAATACACGATTACCTT  
 TCCTAAGAAAAATAATATTATGTATACAATACATGCTATTTATTGATAGGAATTCATCGTTATATACAAA  
 CAACCGAATCATTACGTAAAAACGCACATCGTTCCTTACAATAAACAGAAACAACTTTTCATGTATTATTTG  
 TTATGTTTATATTAATAAAAAAGAGGTTGCTATCAAGATACGTATTGCTAGTAAAAACACAATATCAGT  
 TATTTATGATACAAAAATCTAATTTGTTATATTGAGTTACATGAAGTAACAATGCAATACTCCCAGTGAG  
 TCAGCGGTAAATTAACAAAAAACAACCTTAATAGGTTTAAATAAATCATGGTTTGATACCCGTTGGTGGG  
 CGATATTCTAGCCTTGCACTAAAAACGAATAAACAAATCAGATAAGTATACAGTATACTGGTTGAAACAGTT  
 CTTAGTTAAACTGAATGTTATCATATAATGCTGAAATGTATAGTAATATATAGAAAGAAGCAAATAAAAC  
 AGAAATTTTCGTTTATGTTTAAACGAAACGTTATGATTTTTTTATTAAGATGTTTCATATTTGTATTAGAA  
 CACATTAATTTCTCCCTTTCTGAAGAAATATCTTTATATATTTATCCATGAATATGATATAAAATTTCTGT  
 GAAGATATTTGATCCTTATCCGATATTTCGTAGATCCAAGGGCTTCTGACTCATTCACTATACTTGTTTTAT  
 GTCTCAATGCTTGTCTCTTTCTAACAAAGAACTACCATATCACACCACACTCTGTCAAATTACTCTTC  
 TAAGAGAACCGTGTGTGTTAAAAAGGTTAGAGTTCTAACAAAGATATGTGTTTACAGGTTAGAGCCCTAAC  
 CTGAATGAGTGTCTACAGGTTAGAGTCTTAGCAAGGGTGTGTGTTTACAGACTTTTGTCTGACAAGTTT  
 CCGTGTTTACAGTTTATATTTCTAACCGCAGTGTGTATGTTAAAAGATAAGGGGCCCTGCCAGGGGTGCA  
 TGTGTACTTAGAACTATTTATTACTGATATATAAAAAATGTAGTTTAATTAATATATTTTTCTCCAATTAC  
 TTGTACTTCTCGATCCAGGGCCCGGCACGGCCAGGTGGGTAAAGGCAAGGCGTTGACTCGTAATCCGA  
 GGGTCGCGGGTTCGAATCCCGGCCGCTCCAAAAATACCGGGGAGGCATCACAATGTGACGGTCAATCCCA  
 CTATTCGTTGATAAAACAGTAGTCCAAAAGTTGGTGGTGGGTGGTGTGATGACTAGGTGTCTTCTCTCTAG  
 TCTTATACTGCTTAAATAGGGACGACTAGCGCAGATAGCCCTCGTGTAGCTTTGTGCGAAATTCAAAA  
 ACAACACATTTCTAGATCATTTTATATCAACATTCCCTGCAATACAAGATATGTACCAAAGGACACTGT  
 TGGGAAATCAGTTATTTGCAAACTTTTAAAGAAAAATCTTTAAAATGTATGTTATTTTATTGTATAATGT  
 TTGATACACGTATATGAGTTAAATGTTATTTTATTGCATAGTATTTGATACACGTATATGAGTTAAACT  
 GTTATTTTATTGTATAGTATTTGATACACGTATATGAGTTAAACTGTTATTTTATTGTATAGTACTTGAT  
 ATACGTATATGAATTAAATGTTATTTTATTGCATAGTATTTGATACACGTATATGAGTTGAAATGTTAT  
 TTTATTGCATAGTATTTGATACAAGAATATGAGGTAAAATGTTGTGTTATTATATGCAGCTGTCAACTGC  
 AGTAACGTGGTAGTTTTTGTCTTCCGAAACATTTATCAGAATATTATGTAAACACGATTGTTTACAGA  
 AGGCTGTAGAGGAGCAACAGATAAAAAAAAATACCCCATCATCACAACACTAGTATTATGGTAATGAAAC  
 TGATGAAGCAGGCGATTTGTTATTTACTATAATACGAACAAAATATAACAAATAACTTCAGGGAACTCA  
 AAACCTGATTCTTTTTTATCCCAACTTCATATTTACTCTCTTTTTTAAACACAATAAACATTAAACAATAAA

AATACATAAAGGTACCAATTCTGAAAAGAAAACAACAGAAACGTACTGTGTGTTTTTATTATAGCAAAGC  
CACATCGGGCTATCTGCTGGGCTCACCGACGGGAATCGAACCCCTTGATTTTAGCGATGTAAGTCAGTCGT  
CTTACCGCTGTACTAGCGGGTGGCAAAACGTACTCTTTTCAAGATTTCTGTCAATATGAAATTAGATGAG  
GGGTCCAACCTCCCTCATGACCTTCCTTATGCCATCTTGTGTCACTGTATCAAGCCTGTTGCTGATTGATC  
GAGGAGAAAAGTAGAAACGTATAAGGAACAGGTACACATCCGTATAGTCCCCCCCCCATTTTACTTTAT  
ATAATATATTAAAGTAGTTTATAACCTCAAACCTGCATTTAAAGGGTATAACAGTAAATAAATAATTATTA  
ATCAGACATTATCACATACATTCTGATATAGTATTTATTTATTTACACTTCACATGTAGCTAATATTTTA  
CTGATTTACATTAATTGTAATTAAGTGAGGAATTTGATTAACGGACAGAACCCTAGTCCTTGTAAGATGTA  
TGAAAACCTTCATTTACAACACAAAAGTTGACAACATTTGTATAGAGTTTATAGACCTGGGTGTGAGACGAG  
AGTCTTTTCGTTGTTACTTTTAACCCCTAACAACGTACTTAACATTGAAAATTAACAGCACTAGGCTTAAT  
TTATTTTAAACACAACCTTGTTGCAACTCAGCTTTATTAACCGTTTCTCAATTTTCCCTATTAGCGGTTTA  
TTAAATGTTAAAAAAGAGAAAGAAATGATCGTATTTCTCTTGTAATGGGAGTTCCATTCCTTTTGTTC  
ACAAAGGAAGGTTAGGTTAATGTTATTTTTTATCTTTGTTCCAACCTATACCAGATAAACAGGTTTTCTA  
GTTGTAATAGGTTATACAGTTTGCTACTAGTTTTGGCGGATTTATACTTTTATTGTCTGTTTTGAATTC  
CCGCAAAGCTACACGAGAGCTATCTGTGCTAGCCGACCCTAATTTAGCAATATAAGACTAGAGGGAAGAT  
AGCTAGTCATCACCACCCACCGCCACTCTTGACTTCTCTTTTACCAACGAATAATGGGATTAACCCCTAA  
CTTTATAACGCCCCCAGCTAAAAGAGTGAACGTGTGTGGTGGCACGAGGACTCGTGCTACCCCTCAGGT  
TTCCAGTCAAGTGCCCTAACCATCTGGCTATGCCGGGTCAATTATATATATATATATATTTATAATAAACT  
TTTAAGTCTAATGTGTTTTAACTTCATTGGCAAAAATATATTTACTTAACACTCAGAAAAAGCACAGAA  
CAAAACAGTATACTGAAACATAAATTCTCTGTTACTCTACGTCTGTTACACGATAATAATACATGACAAC  
TTCTTTTACACCAGGTATGGTGTCTATATCTCTGCTACGTGACTCTTTCCTACTGCTGTTACGCGAGGC  
TGATCATTCCTTACTGCTTGTAGCGCAAGGCTAACATTTTCTACCTCTATTACTCATGAATAATCTTCC  
TTTCCTCTGATACAAAATGTTAGACCTTCCCAAACCGCTGTTACACAAGATTAACCTTCTATACCTGTGC  
TACTGTTTTCCAACCTCTTTGTTCAAGGTTAACCTTTCCATACTTTTATTACGTGAGATTGACTCTATCT  
CCTTTCCTTTACGTGTGGTTTAACCCCTTTCTATCTCTTTTAAACCTTACGTACCTCTGTTACAAGGGTT  
AACTCTTCTCTGGTTGTGTTAACAAGTATTAAAGTTAAATGTTAAGACTGTTGTTTTACTTCTGTTTTCG  
ATAAATCAGGTAGTCGTTCATAATAGTTCTGGAAGGTGAACATAACAGTTCAGTCATTACTACTATATAT  
TAATTTCTCGTCGGAGAACATTTTACTGGCTTGCTTTGAAATATTGGTTCTAGAAAGCTTCTGTGAACC  
CAGCATGTAATCACTTGATCCATCTTTTTCATGTTAGATTTTTTTTTCTATTCTTTATTATATCTATTTTA  
GTTACTAACTTCAATAATATGACGAAATCAAATTGATCATAAGGAACTACTCATGTGAATATTGTCGTGT  
AGACTTTCAATTGTATAATTGATAGAGTTCTGAAGAACAACCAGAATTCATAAACCCCTATTAAACATT  
AATTAATATTTTAGCATCCTGATTAAGTGTAATATTATTTGTTAATATAAACATCATACACATTATGTA  
TCATAACAATAACACATTTTAGATTCCCAGTGAGGTTTCGACTCCCTGCGGTGAATAGGGTGCAGACAG  
GTCCATCGTGTAACCTTGCCTAGGAAAATAACAGCTGTAATATTGAAGGTTTTTAGAGCTCAAATTGTG  
GCCTGTTTGAGTCAGTGTGCATGCTGCTTTAGTTTGTAAGAAACAAGTTCGCGTGAAGGAAACAAATATA  
AAGATATACAAGTACTGTAGAATGATATTAGTATCGGATATAATTGAGTGTGATATCTTGTAATATACAT  
GAATGAGTGTGGTATGTTGCATAAATGGAATGTTATAGGTATAGGATATGACTGAGTGTGATATGTAAAA  
CATGTCAATTGAGTGTGATATATTATATACACGGAATGTTATAGATACGGTGTATGATTGGAATCCGTTGA  
ATAGTAAATGTGACGCCGCTTCCTTAAAGCTATGTTTTATTGGCAAAAAGAAAACAAACAGTATACTAGA  
AGAAAGAAGAAAAGTCATAGATATATCTCGTCTCTGACAGGGTTGATGGCTTCTAAGAATCAAATACATT  
TTCAGAAAAGCGAAGGAACGTAAGGTCCGATCTGAGGTTGAGCTGACGGTTCATGGGAGAAACGTGCTAC  
CTATCGATCCAACGTTGATATTAGTCAGAAGTGGAATTTATGTTGTGACTTGGACATGGTAACAACGACG  
CCTGTAGAACTTCTATAATTGATAATTTATCATACACTACACTTTTGAAATGAATACAGTGATAAGACAA  
GTTAGAAATGATAATAATAAAACATTAGTAGAGACTTTATCAGTTGCGTGCAGCAGTGAAAACCTATTTGT  
AGCCAGCACCTTAAACCTTTGTGATGAAGTACTTGGTTTATAAATGAAATGTTATTTAGTTACTATTAA  
TAAATCCCGTAAAAAATGAAAAGAAACCAAAACCTAACAAATTTAAATCCTTCAGCGTGCATTTATAACT  
CTCCAGTATGTAAACGAACGTGAGAAAAATAAAGGGCCTTATAGCTTGAGGAAACCAATTCGTGTATGA  
GAAATATATATTTTACATACTAAGTGTCTCTTCCCAGCCATCACTGGTCCCAGTAGTTGCAACAGTTTTCT  
TTAAAAGCGCATTTCTTCTAAAAAAGAACTCATCTTTCAAAAACCTTCTTTCGTAACAAACGACAAAT

TAATTTTCAGTCGATACCAAATAAATCATTGCTATAGAACTCCCTTGACAGACTTTTATATAACAGAAAA  
AGAACCAGAAACGTAGGAGCTGTTTACTCTTATGTTAGCGATTGAATTCAACTAAAATTGAACGGACAACA  
AAAATAGGAAGTGTTATAGGAAAAAGGTAGAACTAGGCTTTGTAAATAACTAAATTTGGAGAAATCCAGC  
GTAATCGACTGACTGACTGACCGACGTTCCGGCTTTTATGATTACGATTTTTTCTCTTCTCTTCTGTTATA  
CACTATAGATGGCTCTACAATTATTTCAATATTTATTTGTTGTTGTTTAAGGCGCGGCCACTAAGACTAT  
CCGTTACTATCCTTCATTTTTGAAATATTAATAAGAGGAGGTAGGCAGCCAGTAAGGAGCATTCTCTGC  
GACCCATCGTCAACGCTAAAGGATTGGCTGTCACTCTTATAACGCGCTCACACTTGAAAGTATTGTGGTA  
TCACAAGGTTCCAGAACTCTGCCACCGTTTATACATTTCTGTTTGTTAATCTTTCTGATTGAAACGAATG  
TTCGTGTCTGTTGTTTATAAAATATTTTGTATAAAATAGAAAACCTGTTTATTTGCGAAAAACGAACTTAA  
AAAAAGGAAGATATGAATTTTCATTGTTCTACTTTACGTTTAAATGCATACAACGTTTAAACGCCTTCCAGTT  
AAGATAGGTTATCGTTATCCTGAAACAAACTGCGAGAAAAATAATATTGACCTTCTTAAAGGTTAGTAAAC  
ATTTGATAATCTCATCAATGAAGCGCAGAGGTTGTGTTATTTTTCTTCATAAAACGTCCTAGGTACTGAT  
CAACCCACCCTAGTAAGTAGATTCTTTAGTTAAATTGCACACATAACACAGGATTTTTTACAGTTGTACT  
TTCATGTTGAAAAAGGTTGAGAGAACGTGAATCATGTTGTAACGCTCTCATTACAAGTGCTAGTATATA  
AATAGGTTAACGCATTCTGATTTACACAAGTAGTATGTATTCTAAATATTCCACGAGAGTTTCGAGTAAC  
GGGAAGCCCTTGAATTACATATACTAGAGGTTTATCCCAGCTGAATTATATCTTTACGTTTTTTTTGTG  
TTTTTTTTTAAACAGTGTAAGGTTTTCGGTCATTTACGAAGATTAGGAAGCCAGAGATCTCCTCGCTATACAA  
TGTGTAAATATTGTATTTGTAAAAACCTGAGTTGAAATAGGCAACACAGTCGTAATTTCTTCATATGGTT  
TAGGTTTTGATACTAACACGCAAAACGTACAAATGTGTGCTTTCAATTTTTTGTATACGCGAGAATAAAT  
TAATAGGCTTACCAGTAGTCTACATGTCTGTATCCCTTCCCCACAGAAAGGTATCTCTCTATATATAC  
ATACAAAAATATCTATATGTATTTGTATTCTCACTTAGGGGTTCTATGATTTTTTTTATATATACACAAAA  
AATCTATATACATAGATACACAAATGTCAATACATGTAAATTTATATATTTTTTGTGTTGTCTAAGTAG  
GATATCGTGTTACTTTTGTAATGAAAAGAGTTGATATCTACTCTTATTCAAGCACGTTAATAACACCATA  
GAAACAGAAGACAGAAGCAAAAACACAGTTTATTGTGCGTCATCATCTTCTGTATTTTAGCTTCTATACT  
TTAAATACTATTGTTTTCAATTTTACAAAAATACATATATTATTGTTTTTTACGTGAACCATTTCATGT  
ACAGTCACTGAATAAACATGTTTCGGACGAAACGTTACATCATAACAGTTGTTTGTATTTCAGAGTACTAG  
ATATAAAGAAATCTGTGAGTTGTTTGTATTTCAGAGTACTAGATATAAAGAAATCTGTGAGTTGTTTGTAT  
ACTGTATTCTATAGATTACGAAATATCGTGTAATAAATATGATATGTTAATAGCAAGCAGAAATGTTA  
CCAAAAATGGCAGAGACAAAGTAAGAATTGCTAAGTTGTGTAATAATAATGAGTTTGATTACACTTCAT  
GTATAAACTCAGCTCATAACACAAAGTGTGTTTGTGTCGAACATGCTTGCCTTTTCGAGTGTGGTGGCGTT  
ATAATGCAAAGGCTATTTCCAATATTTCGAAGTTAAAGAGTCGTTCAAGAGTTACCGCTGGGGGGTTAACT  
AGTTTTCCTTTATAATTAGGGAGAGCTAGCGCAGATAGCCCTCGCGTACTTTGCGCGAAATTCGAAAAAAG  
AACAAAGCTTTATGTATATTAGCCCATATATATATATTTAAAAAAACAACATTGGTATATTAGAAACATT  
TTAAACCAGAAATTCGAAATAACTTAAATAAAAGTTTCCAGACTATTTTGAACACATTATTTTTTAATTA  
TTGTTACGCAGAAATATTTTGTTCGTGAACCAATGAACTGTAAGAATTTTCAATATAAATGGGTAAAAATA  
TATACAAATGTACAATGTATACTACTATTATTTGACATAATGAATTCTCACATATGATGTCATTCTACAA  
CTATTTTGTGAAAAAACACAAATTTACAGAAGCAGCTATATGTCTAACTTTATTTTTTACACAATAGTGA  
TGTAAGATATATGTATATCAGTATAACATTAAGCTGAAATATGAGCTCAAGAGTTTGTGTTTGTGTTGAT  
TTCGCGCAAAGCTACACGAGGGCTATCTGCGCTACCTGTCCCTAATTTAGCAGTGGAATTACGAGCCCTTA  
ACCACCTGGCCATGCCGAACCAAGCTCAAGAGTAAATGCTGGTTACCTTTTATAACACCAGAACTTTCTCT  
CTCTATATATAAAAACTGAATGATGAAAATAACTACATTGTACACAATAATTAGAAGATAATAAAATAAC  
GTAATGTCATTCACTTCCAAGATCAATTTCTCTTATTTTAAACAGACATAATCGTTTGTTTCTTTTGAAA  
AAATAACAACGGTCTGGCATGGCCAGGTGTTTTAAGGCGTTAGACTCGTAATCTGAGGGTTGCGGGATTCT  
GAATCCCCGTCGCATCAAACATGCTTGCCCTTATCTAAACCCGATTTGTAGCATTATAAGTATCTAAGAC  
AGTTGCAACATTTCGATCTGAAGTGCGAATGATAAGCCATTTAACTTGCATACGTAAATGAGCACTTGTTA  
AAGGAGTTAACTTTAAAACTTTGTATTTCAAGATGTTCTGCTTCAAACATTTAGGATGGTCACTACGAAC  
AGCAAGGCAGCTTAGAGGTTATGCTGTCTGCTTAAATCAGTGCCCTAGCCAGTAAACAAATGGAAACAAG  
TCGCTTTGTGCAGAAATCAAAAACAAACAGATAAATTATTTGTGAAGTATCCGCTCTCGAGGATGC  
AGCAGTATAGCCTCAAACCTGGCTATGTCTGTGCTGAGGTATCCTCGAACACCATTCTGAAAGAGGTGT

TTCTAAATATCGTTTGCGACTGGATTCACTTGACGAGATGTGGTCCATCTCTCAAGGATATCTTACATA  
CTTGATGAATTGAACCTCTACTAGTGTGCATACAACCTCTTTGGGTCGATCCCATCTTCTTTAAAGAATCT  
GTTCAACAGTTTAGCAAGGAGGATGCAATAATTTTTATCCCTTATGCTGCAGTTAGGGCTAATTACGCCA  
GCATATGACAATACAGAAGATCTACAGATATGGTTCGTATAGCATGAGTACCATTCCACGGGATCTAGAT  
ATTGGGATGTTACCGATTATATTATTTTCGTTAGCGTACTTGCCAGTATCATGTCTGTTACGTTATTT  
ATCTTCGTGACATTAATTTACAGGACGTTTCCTTGGCACAATTACACCTGAACAGTTTGTGTTTTTTTG  
CCTCGTGAGAAAAATCAATTTCTTTGGGTGTTTTGTATACAGGCGAGCTAGTGGAGTCTTTTTATTTTT  
TAGCTCTCTGTACACTACGTGATGTGCAATCACGACTGCGAATGTTTGATTGAGTCTCTGTGTAGGTATT  
ACTTATTTTTCGATAAAACCAGAATAAAAAAGACAACGAGCATTTTTATTGTATTGTAAATAACAGTATTCTAT  
GTTTCAGACTCCTGATCAACTGTTCCGCTGGTTGTGAAATTGTTTCAACTTTTCCATATGAGTGAAACATT  
CTAGTTATTTGCTTGAGAACTTTTAACACTCTAATTCAATTCAAATTAACAATTTTCGACAAGACTTTATA  
AAATCTCTGCATGTATATATAAATATATACGCGGATATCTCTCTTCTCCCGCTACTACAGCGGTATGTC  
TACGGATTTACAACGCTAAAAATTAGGGGTTTCGATTCTCTCGGTGGGCTCAGCAGATAGCCCGATGTGGC  
TTTGCTATAAGAAAAACACACACAGAAGAGGTTGAATGATTAAATTATTTGCACTTCAGACCACATGATT  
GATTATAAGACGCTAAATTTAAGTAACAGTGAATAAAGAGAGGATGGTGGTTCTCACTATTTAACAATGG  
ATAGATCTTATCATAGATGTAATATTACAAATTCAGATTACTTTTTAACTGTTTTATGTAGTCTATATTA  
TCAGTCGCTGACGAGACCGGTATTCCAACTTTTATTATTTTTCTTTGTTCAAGTAACATTAACACAAAAAC  
ATTGCCACTTTGATAGTTTAATTGTGTTGTTACTTTACATCACATAAAATGATTAAAAATATAACAGTTT  
AATATATACTTTATACCTACGTACGTAAGCTTCGGATTACGAATATACACGCACACTTAAGCATTGGCA  
TTAATTACATTAACCACTGTTTATTTTCGGGTATTATGTTAGAGGGTACTCATATATAAACTCACGAGAC  
TGGAGACTTACACTAAATAGCATGAAGACTGGTATCTCAAAGTAGGATGGAGAAAACTAGAACTTAGAGT  
TGATTAACAAATAAATCCACGTGTTTTATTTATTTATTTATATTCCTCGAAACATTACAGCTATATGTGT  
GTTTTATTTGTTTATCTATATTCCTTGAAACAAAACAGCTATATATAGGTGTTTTATTTATTTACCTATA  
TTCCTTGAAACAGTACAGCTATATGCCTGTTTTATTTGTTTATCTATATTCCTTGAAACAATACAGCTAT  
ATATAGGTGTTTTATTTATTTATCTATATCTCTTGAAACAGTACAGCTACAAGTGTGTTTTATTTATTTA  
TCTATATTTCTTGAAACAGTACAGCTATATGTATGTCTTATTTATTTATCTATATTCCTTGAAACAGTAC  
AGCTATATGTGTGTTTTATTTATTTATCTATATTCCTTGAAACAGTACAGCTATATGTGTGTTTTATTTA  
TTTATCTATATTCCTTGAAACAGTACAGTTATATGTGTGTTTTATTTATTTATCTATATTCCTTGAAACA  
GTACAGTTATATGTGTGTTTTATTTATTTATCTATATTCCTTGAAACAATATAGCTATGTGTGTTTTATT  
TATTTATCTATATTACATGAAACAGTACAGCTAGATGTGTGTTTTATTTATTTATCTATATTACATGAAA  
CAGTACAGCTAGATGTGTGTTTTATTTATTTATCTATATTTCTTGAAACAGTAGAGCTACATGTGTGTTT  
TATTTATTTATCTATATTCCTTGAAACAATACAGCTATGTGTGTTTTATTTATTTATCTATATTCCTTGA  
AACAAACAGCTATGTGTGTTTTATTTATTTATCTATATTCCTTGAAACAATACAGCTATGTGTGTTTGA  
TTTATTTATCTATATTCCTTGAAACAATACAGCTATGTGTGTTTTATTTATTTATCTATATTCCTTGA  
CAATACAGCTATGTGTGTTTTATTTATTTATCTATATTCCTTGAAACAATACAGCTATGTGTGTTTTATT  
TATTTATCTATATTCCTTGAAACAATACAGCTATGTGTGTTTTATTTATTTATCTATATTCCTTGA  
AACAGCTATAGATAGGTGGTTTATTTATATATCTATCTATTTATTTCTTTGAAACAGTGCAACTATGTAT  
GCGTGCTTTTCATTTATTTATCTAAAGACGCTTATTTTTCAAAGCAAAATATGAATTTAAAAATAGTCCAGA  
TTATTGTTGAAATGTTGGTATGTACGTATGTGTGTGTAAATTAAGTCTTTAAATTATAATAGTTTGAAGG  
TGTTTTTCATTACTAGAGATAAACATGCAGACACACACTTCAAAGTTGAATAAATATTATATTTCTAAAAAT  
AATGTTCTGCATTACTCTTGAGACTCGAATCCATTACGCATGTGCCTTATTTCTTACAATAACGAATAAT  
CTTACTATAAAATATCATCCATTATATATATGTCTGTATTAACATCCATCATCAAAGTTTGTGACTTAA  
ATACTATAATTATTCCTATGTTATCTGAAAACTGTGCAACGGGTGTACATAAGTTTTAGGATTTTTGCTTA  
AGAAGGGGATAGAAATATCCTGAAATAAGGTCAATTTTCACTTTATTATAAACTTTTGACTTTTAATTGA  
AAAAAGACACGAATAATTAATAAGTTAAATTAGTCACTTTTAACTTTCAACAAGGCGGCGTCTCTAACAG  
TTTAACGAGTGCCCTACTCATTATTATAATAAATATATCGTATAACGAACGAATATTTTCAGCAGTTTGA  
TTATTAGTTTTTTATACAGCACGTGCTACGTGAGTCTTTCAGATATCAATAAAACAGGAAAAATGCCAAC  
ACCATGCTAGATATAAAATAAGTCTTCATGCAGTTAGTTAGAGGTGTTTGGTCGTTTCAGTATCCTACTGA  
ATCTTTTTGTTAGAATAAAAAATAAGCATCTAGATAAAGGAACAGCTTAAGCCTGAAGCATACACTATATA

CACATAGAAAAATATACTAATATGTATATATACTCAAACACAAGATATATATTTATACATATAGTGTGAA  
GTTCAATAGAAATTATGTAGAGTAGCCATAGAAACTGTCTAGAGATGTGGGGAGTTGCTTAATCATCACAT  
AATTTTCATGCAGTAAGATATATGTATGTAAACCGTGAAGAGAAATTGCCAGAAGCTTAACTAAATATTGA  
CACGAATTTTTGCTTGTATGTAGAAGGCTTAAGAACCGGTTGTACTCGTTTACTAATTTAAATATGAACG  
TTATCTACATACACATATATTTTGGTGTCTGTATCACATAGCACTTTTGTCTCAAAGCAATTCAAACAGA  
TGCAGGACTGTTATACAGACACTTCAGAGAAATTATACATTATCTTGTGTTAAGTGCTTTTTATCTCGGTT  
TCCCCGAAAGAGTTGAAATTGGTTTATATAATTGCACCGATTATGGAGTGCTGTTTAGTGTGTATGTCTA  
TGTATACAATCATACACACATAAACATATATATGCTCAAAGAGATTTTATTGCCCAAAGCTAAAATGTAT  
TTGAATCAAGTGGTAGAAAACCTTTGTGTGAGTTTCGTGTTCAATAATCCTTGTTTAAACTCAGCTAACCC  
TATTTCCCCAAATGTCTATATCCTTTTCTTTCTGTATATTAAGTTTATGAATAAGTTGTAAGCAGTTTTTT  
TTAGTGTCTCATTTCTCTGGTGTATAGAGAAACGCCAAACGTTATCGAGGTTTCAGATACTAACAGTTGT  
TTTCTCTTCATGCAGGCATATGTTTATATGTACGCAGAACTTCGACGTTAGCATTTTCGAGAAATCCATAA  
CTTTACAAGTGAACTCCATATCTTTGCGTGAAATAACACTAGCATTTTGTGCGAAAAGATCTCAAACGTG  
AATAGTAAACTATATATGAGAAGAAGCCAGAATATATTTACGTGCTATTTTTGTTCGATTATGATCTTT  
TCAGACTTCTAAACTGCCACTCAGAATTTAAAGACACGCCTACTAATCCCTTCTATCTAAGAAACTT  
CTCGCCGAGGCCAATCAGAGCGTGGTCTGGAGAGCACGTGTGATTGTTATGGTGAGACTCCATGCATTT  
GTGCCGCATGAATCGGAGCGTGCAACTTTGATTGAGAACGAAAATACACATGTTAACCATATTACTCTTC  
ATCGGGCTTAATAGGGACATAATTACTTCTCATGAAGCAAAGGCATGGCAAGTTTTCTTTTCGAGTTACT  
CGCGGGAAAAGGTCGTATGAAACTATCAAAGGTAACTTAAGAGACAAGAGGTATCACCTTATAACAGTA  
CGAGAGATGGGTACTTGACCATGAGCTTAAGATCTAGCGGATCCACTTTGTCAGAAATCTACTGACATAT  
TAATCTCCCATTACTTTTGTAAACATAACGTATGATGTTACGTCCTTTCTTTTAGCTAACAGAAACAA  
TCCAAACGCGCAAATTGAGGCTTCGGCTAATGTGTCCCGAACACTCCTAAAGGGGGTTTATTCGATTTCA  
CTATGTTGATTGTATTTTCCGACAGAGAACAGTTATTATGGCATAACTGCCAAAGTCTTGGTACATTAGT  
GAAAGAAGAGAGATAGGTATTAGTTCTAATAAATTATTATTATTATTGGACATTAAGACTAATAAATCTC  
AAGAAATAGAACGTACGTGATTTTTTGTATTAAAGACCATTTTGTGCGATAATAAGTTTATAATTATTAA  
GAAGATGACACTTTAAAGGAAAGGTGGTTTCAGTTTTGGTTAGATCGGTCACGGAATATGCACTTGTAGTA  
AACTCAGAACTGACCAATAGTAATACTCTTCAGAGTTACATTGTAATAATGTCTTCCACTGCTACACCT  
GGAATTTGTGATAAAGAAGTCGCGCTTTCTTTTTCACTCGCAGTGTTTTTGTGTTGTGACATAGATGTATA  
GAAGTTGTTAATAGTCACTGCAGTCACGTGCAATATATTCGTATTCTATTGGCCCGAACAAATTCAGGTTA  
CTTCAATCAGGCCTAATAACACATACCAGCAGTAGGCTAAGAACTGACATGCTTTGTTAGTGTGTAGGTT  
AGAAGCTAGCAGATGAATGACAAGTTAGTTGGTAGTTTCTTCATTTGATTATTTCCATGACAAGTGAAAT  
AGATTCCTGTTAACAGATGACACGATAACGAAATGACAAGAACTTCATTATCTTGAATAAGTTCTAAACG  
GAAGGCGCTGGATAGCTTAAACTTAATATCTTATGTGTATGACCTCCCGCAATTATGTGTCACTCCGAG  
AAATATAACGCCTCCTGGTGATAAAGATTTTTTCAAGATTACTTTATCTTTTGTAATTTAAACTCACGAC  
GAGATATTAGAAACGCAATTCTCTGGAGAGAGCTTGAGATTTAATTATGGGCTTTTATTAAGAAAAAT  
ACGCTATTTGTAAAGACAACCTTAGTTTCATACTTTTAGGATGGAGGACCACATTGTTATAATAAACTCGCT  
ATAGGTTTCATTAAGATCAGTATAGATATTGTTCTATTAGTGCAAGTTGCACAACGGTTTACTTGACGCT  
TTCCACAACGTTGTAATCTGTAAATTTACTGTAGACCCACAAAGAAGCATTAAGGTCAAATTAATAATC  
AAATAACCAAGTGCCAAGGATTTTTTTTTTAATATTTGCATCAACAAAGAACACTTACAAAGATATAAATG  
TAATGAGACACGGGAAGACTAGTTTTATTTTCTATTTAGAACAAATGCTACTGAAGTTATCTACTGTGATC  
CCTAACATTGAACTATTGATTAGAGGGAAGAAAGACAGTCAGCAGCACCTTACCATCAACTGTCCGCGCT  
AAGGGAATTGACTGTAACCTTTATAACGCTCACCAACTTAATGTGCTCAGAGTATTTTATGGCATCGAAC  
GAATTCGAACCCGGCTCGCCAGGCTCGTAATCCAGAGTCCACAACGGGTCCAACCGACGTTCCAATAAGA  
AACGAAAAGTAGAAAAGAAAGAACGAGCACAATAAGAAACAAATATACAGATAGATAGATAGATAGAAGGA  
TTTCACGTGGAAAATCGTAAATATTTCAATCATATCAGCGGGAGTGGTAATGTTACTGGGTCTCACATC  
TTGAAGAAGAAAAATGGATTCTGTTGTATAAACGTTGTACAAAATATGTTGTGACAAAAACAGTTTCATGA  
AATTTCCGATGTCTGTTAATCACAGTAACATAGGGCAGATTAACGTGCCACAGCTCTGACAAAGTGACGT  
GTATGTGTACATGTATTTTCGTATCGAATATGAAAAATGTGCATACATTATTTATTCTTTTCGTTCATA  
TCACTGTAGATGTTATAGTTTCTCAAACTAATATATTCCGCCAGTTGCATAGTTTTTTCTTTAAAGAGA



GAAGAAACGTTTGAATGACAGCTCTGGTAGTGTGACTATAATGAATTATGCAAGAATAGAGGACAAATTT  
CAGGGGAAAGAAATCGATGTTATCACTCGGTCTTCAGTAAGTAGTGTCTTATAACGCTAAGCGTCTTATT  
CTACTGAAGAACAAAGAGATAAGCTAGGCCTTTAATCCATACGGAAGGCTTGTCTGATTTAGATTGGAAG  
AACCACCGTGCGTGATGGATATCACTGTGTGGGTATATGAAATGTATTTTTGGCTACCGAATTCACTTTT  
CGTCTTGTGTCATTGATTTAAGTTTCCTTAAGTATTAGCTTCGAATAAAGTAGTTATATAAAGCAATGTCC  
TTTCTCTTGTGTTTTCGCTATTAATGTTTAGTCACTTGTGTTACTTTTTAAGCGCAGAGCCACACGATCGGGTA  
TCGGTGCTCTGTCCACCGTGGTGAACCGAACCTCAGATTTTAGAGTTTGAATCTGTAAATTTGCCACTG  
ACACACCAGGAGAATATGTATTTACTGATACAACAGTTCCTCAGATACAACAATAAAATGGAATATTCAG  
TTTGTATAGAATTAGAGACCTTAATTTTGAGAAATTACAATAACTCCTTCCCAAATGTTTTCAATACTAC  
TAAAATATAACAGGATCCTTATTAATCAACACGTCTACAGGGCTTAATAAGAGCAATGTTTTCAACACTA  
CTAAAATATAACAGGATCCTTATTAATCAACACGTCTACAGGGCTTAATAAGAGCAATGTTTTCAACACT  
ACTAAAAGATAACAGGATCCTTATTAATCAACATATCTACAGGGCTTAATAAGAGCAATGTTTTCAACAC  
TACTAAAAGATAACAGGATCCTTATTAATCAACACGTCTACAGGGCTTAATGAGAGCAAATAAACGAAA  
CTTTTTTCTACTCTCGTTTTTTCGATTGAGAAATTTCTTTTGATTTTGACAATTCGCGAATTTATCTA  
TCAGTTATTGTTTCATGAGACAATTCCTACAATTGTGTTTTATTGGTTCCCAAATAAACATATACAAAT  
ATAATGACGTTTCTAGCGATACGCTATTAATAAATGTTAGAATCACGAAGTGCTTTGGTTTGTCGAGTT  
CGTTTTGTGTCATGTTATTTTACATCTTAAGATTTTGTGTTGCGAGCTTACAACATCTGCTGCTTCTGTTTT  
CGATATAGTGATTTTATAACTTCCTGTTTATTACATGAAATGTAAAGTATCTTTGTTGGATCTGCTT  
AACATTATTTTCTTCTTTCTTTTGTCTCCAACTAAACAATATCATAAACCAGCATGCTCCTCCCCATT  
GGCATAGTGGTACGTTTGCAGATTTACAACGGTAGAAATCGGGGTTGATACCTGTTGTGAGTAGAGCAC  
AGAGAGCTCATTGCGCAGCTTCGTGTTTAACTTTAACTGAACAACTAAACGATCATAACTGTAGAGAAA  
AACAACCATTTTTTATTCGAGGTACAACATGTGGTGTGTCAACCAGACCGACACCTTATATAACACATC  
GGTAAACGGCCAGGTGAGAACTTAAAGACTCAATCATAACAATCCTTAATTTCCAACCATCGACATCAG  
TGAAGAGATGCAGTCAGTAGCACCTACCGCTACACCTAACAAAATCTAGAGATTGATCAATACTTTTAT  
CACATACTCATATCTGAAAGTACGGAGTAGGGTAGCAAATCATGGATTGCAACCTCGGATCCTCTGATCA  
TCCGCTCGATATATTAACCACTAGGCCTTTCTATATAGCCCTTAATTATTTCCATAAGTAAAAAGAAAT  
CTTATCTGTAGCAAATAACATACTTTTTTTTTTAATGTGTATAAGTAAAAACATAATTAATTCGCCAAGTG  
GTTGCAATACTTAGTCACGTGACTAAAATTTGACCACCCGATGTTATATATAAGAATAATCGATTACCAA  
GGTGAACATAAAAAATTAATAATGTTTTTTTTTGTGGGAGAAGAACACATATAACTTTTATATTGTTATAT  
GAAACAACGTTTTGAATAAAAAACCAACCACTAACAACCTATAATTACTCTGCACGAAACATTTAGTAG  
TAGGTAAAAAAGTAAATAACATAGCTATTTTTGTAACTCAACCCCTCTGAACACCAACAGGGCT  
GTTAAGAAGTAATCCGAATAACTCCATTGGTCCGATTTAATGTGCAGTTAAATGTGGAAAACATTAAGTA  
TTACTAACTCGGACTTACCTTGACGTCACTTTCTTCATGTCAAGGTAGTTGAATGTGCTTTCATCAGTTT  
TAAACAACCTTCACTGTTTAGTGTTGTCTTTGAAATATGCAACCTGAAGGATTCAGATGCTGATCTCTAT  
TATGTGTTAATTAAACCAAGTATTTGATCTTACACTTATGTCTTTGCACAGTTAGGCCCTACACAGGATG  
TTCGCTGGCTTATATTGGTTAGGTACCTTTCAACATATAGTATTGTTTTGCCGACCCTCTTGGTCTTAG  
TATTAGTCTCTGAGCTTTAATACGTGAGAAAAATTAATAAGAGTTATTTGATAATTTAATTTACACATT  
TCCTATTCTGTTTGTGTTAAGCTCAAAAGTCGATAGTGGGCTACCTGTGTTATGCCCATCACATTGAT  
TGAGCCCCGAAATTTAACGTTATAAGCTCACAAGCTTAGCTGTGAATTGCAGTATGGATGGCGAACTTA  
ATGGTTTTTGGTTAAGCAAAAGCTGCACAATCGGCTATAACCTTCTGTCTACCATGGGAAATCGAGCC  
TCAGATCTTAGCATAGTGAATTAATAAAGTTACAACCGGCACATCGTGAAATTAACATTATTGAAAAGA  
ATGAATGAAGCTGTAAGTTTCTCAAACTACTAAAGTCAATCAGTCATTACGTTTCAAAGTATTTCTGTGG  
GTAGTTTAGCAACGTCATACTTTCACATTAGACAGAGTGATTCAATATTACGGACTCGAATAGAAATGAA  
ATCCAGCAATAATTTGAATGTGCAGAAAAAGTAAATTCCTTCTCTCTTCTGTGTAATTTCCATGTT  
GAGACTGTTTTTATAAGGTGTTATACTTTGTAGTTGACAATGCACAAATCTTAGATATCAAAAGATAACA  
GCCACAAATATATCTTATCTTTTTCTTAAAGAAAGTTTTTTTTTATTTTCGTGACTTACGTTGGACATTA  
TTTGAAACTGTGTGTGTTAAGCTTAAAAAGAAAGTAAAGTGAAGGTGAGAAGAAGTGATTAGTTTTT  
TGAAACATCTATAAACCCGGATCTGTGAGTTAAGTTATTTTGAAATGCTGCGGTATTTTCCCTGGTGACA  
ACAGAGTGCACAAGATACATCTAAAGAAGCTCGGATGTTGGGTTGGTGTACTGGCACAATTCTTGTAC

GTTCAAAATACCTAGTCTCTTCAGCTTATCTGCTGGATAATTGACAAACCTATCTTATTATATTATAAGA  
AACAGGCACGAGAAACAGTGGTATTAGATACATAGAAATAACGTATTTTGTCCTTTAGAAGAGTTCCGGTA  
TGACAAGGATATTAAGTGTATCGAAAGCCTGTTATCTAATACATAGTTGAGAATTCAAGTAGTTGTTGG  
TTTTTACCATTGCTTTTTATGTTACGAACGGATGGACATGGATTGTGTTGACAATGTATTGTGTATTAAG  
AGCAAACAATTAAGATTATATTGCTTTTTTTTTTTTATATTCCGGATACAACGTCAGACCATTATCAACTT  
TCACTTGTATGAACCATATACAAAGATGTATTGATAAAAGCCAACTAAAATATCTAGCATTAGGTAATTT  
GTTAGTTATTTTAACTTTGTGTTATTGTCTCGTTTTTAAATACATCGTAGTTTTTGTCTATAATTAAAAAA  
ACAACTGTGTCTGCTAGTCCATCAGAACGTTATGCTTGTTTACACTATGTATTACCCAGAGAATCATTC  
TATATATGAGTGTGTAGAATATTCAAAGTAGTTTACCAAGAAAATATAATCACTTTTATTTTCGCGCCTT  
CGTTTTTGCCATTTATTTACCATTACCAAACCTTTAACTGTACTCTATTTTCTCACCTTCATTCCCTTATG  
CGTGTAGTATTACCAAATTTCAATGATACTTTGCCCGGCATGACCAGATGGTTAAGGCACCTCAATTCGTA  
ATCTGAGCAAACAACAATGATACTTTCCAATTTTATTTTTGAGATTTTCCCTCACATCTGGAACTACT  
GGTTATGTATTGCTGTAAAAACATAATTATAACTCCATGTTTTTGTGTTTTTTTTTACCTTTGTTGATGCT  
CGAACTGAAAAATAAAATATCCAATTGAATTCATTTTCTATACATAAAAGGAACCGGCTCCAAATGGCTG  
AATTTTAAACGAGCTTTCCTATTAGCAGAAAAAATTAAATCGCTTTCAAAAATGAGCAAAAAAAAAATCG  
AATATCTTTTATATAACAAACGTTTATTGAATTTCTTTTTATCGTTACTTGGCTTCAAATTAACAAAAA  
AAGAGAGAAAAAGAAACAAATCATTACACACGTTTCATCACATTGCTGGGCATATTTCTTGAAGTTGC  
GATATTTATCTATTAAAAACAAGTTTATCTGAAGTGGGTTTAATCAGATGGACAAGACGTGTAATTCCTC  
TATTTTAAATTCAACTGTATACCTAATCCATAAAGCTTGTCTATTTTCTCCACAGGACACAGCGGTATC  
AACCAGTTGGGAGGCATTTACGTCAACGGACGGCCGCTACCTGACTCCACACGACAGAAGATTGTAGAAC  
TGGCCACAGTGGTGCTAGACCCTGCGACATCTCCAGGATTCTTCAGGTGTCTAACGGTTGCGTCTCCAA  
GATCCTCGGCCGATACTACGAGACCGGGTCCATTTCGGCCCCGGGCCATCGGGGGAAGTAAACCCCGTGTG  
GCAACCCCGCCCGTTGTGAACAAATCGCCAGTACAAACGAGAGTGTCTTCTATCTTTGCTTGGGAGA  
TTCGGGACAGGCTATTATCTGAAGGGATATGTAATAACGACAACGTTCCAAGTGTAAAGTAATATTCAATA  
CGTTAAAGTCTATTGGAAGCTTAACTGAAGTTCCCTCATATACACTAAATCAGTTCGAACATTCCGGT  
CTGGCTTATCACCAGCCTAAGACGATCAAGAATAAATCTGAACGACTTAGATGTTTTCTTATTAAAAACCA  
GCTGTTTAAATAGTTACTAATGTGGTACGCGCATGTTTTGGTAAAATAAAGTGTATATATATGGATGCA  
CAATAGACGGACTCACGAAGGGCCGCTGAACAGAGGGACTGATATTGTTTCATTTATTAATGCTAACATT  
TTGATATATGAGATAACAGGACGTGCAATAGTGAAAGAGGTCCTTTAACTCTTATTATTTAATGCATAGA  
ATTGTTGACAGTATTTTACAGTTAAATTCATACAATGTTTTTAAAGCTAATTTCCAAGTTGATTGAGATT  
ACGTTGTTTTGAAAACCGAGTTTCGAGCTATATACACGAATATAGTACATAACTTCACGTACTGTATATAG  
TACATTACTTCGCGTACTGAATATAGTACATTACTTCACGTACTGTATATAATACATTACTTCGCGTACT  
GAATATAGTACATTACTTCACGTACTGAATATAGTACATTACTTCACGTACTGTATATAGTACATTACTT  
CACGTACTGTATATTTGAAACTTTAATTACCAATGTCTTAATATTTACAATACAGTATTGTTCTTCT  
CCTTAGATTAGCATACAGTAACTTTTATCTATAATACCTTTAATGTAAATTTCTTAACTTTAATATC  
ACATTAAATATAAAAAGTGTGTGTTATACAGCGACAAAAATACAGATGTTTTCTCGTTCAAATCACGTGCA  
GATAAACGAGCGTTAGAGTTAATAACCTAATACTTCCTTTACGTTTTCTGTTCAAATTCAGTGTATA  
TAAATGTATTTATTTTCGGTTGATCCTTCGTAGTTTGTAAATAATTTAGATAATTAATTTTTTATTGTTTTA  
ATCTTTAAAAATAACTCCGAGCATCATTTTCTAAGTCACGTTATATGTTAAAGTATATGTTAAACGTCGTG  
TAGTAATTTTAGAACACTCGAACCCCTGGTAATGCAGCAACATTATATGTTATTGAGTTCTGCAGTGATT  
GCCCCTACTGTATGTTATTGAGCTCTGCAGTGATTGCCCTACTGTATTTTTGTTGGTTGTTGGATTTTT  
CGGGTGAAGCTACTTTACTAGCCCTTCCTATTTAATTTGTAAGTAGTACGGTAAAGGAAAGCAGCCATT  
CAACACCATCCGCCACAACTGATGCTGTTATCTTAATCGAATAGCGAGATAGGATTTGATTGTTTCTCT  
TCTAACACTCAAAATAGGTAGCACGAATGTTTTGTTGTTTTCTGTGAGCACATTAACCACTGGGCCACACC  
GTTCCCACTTTATTAGACATTTTATAATCATTGTGTCCACTTAATATTATAATTTTTTGTAAAGACAAGCA  
CTAATATTTACCTAGTATTTGTTTATAAAGTCAGGAATTCAAGTATTTAATCTTAAATATTTGTTTAC  
TTGATGAATGTTGTAATGGTCATTCTAAAGCGATGTCTTACCTATAAGATAAACCCATAAGCACATATC  
GTGTATGTGTGATGAGAAATATTGGTAGAACAACATTACCGTTGAAGTCTTTTAAGTGTTTTATGTGAGG  
AACTCAAGAAATTTGTATAAAAAACAAAAAATATTTAAGATAAATTATCTTCTTATGTGACGAAATTGCAC

AACGTTTTGGCTATTCTTGGCCACGTTTCGGTGCTCAATCCTGAATCTAATAAGAACCCTAGGACTAAGT  
TTGATTTCATAGGGTATTAGTGATGACATCTGAGTCAACTGTTAGAAATGTTGTATGGTAGAATTATGTAA  
CTCAGATAAACATGCATAAAATCAAATACATTCTTCGATTTTGACCTGCTTATATTTAATTCCTAATAAC  
AACTAGAGAAGTCCCGTCATTCTTTGTTTATACGTCACAACCTAGAGAAGTCTCGTCATTCTTTGTTTACA  
CGTCACAACCTAGAGAAGTCTCGTCATTCTTTGTTTACACGTTACAACCTAGAGAAGTCTCGTCATTCTTTG  
TTTACACGTCACAACCTAGAGAAGTCTCGTCATTCTCTGTTTACACGTCATAACTAGAGAAGTCTCGTCAT  
TCTTTGTTTACACGTCCTCAACTAGAGAAGTCCCGTCATTCTTTGTTTATACGTCACAACCTAGAGAAGTCT  
CGTCATTCTTTGTTTATACGTCACAACCTAGAGAAGTCTCGTCATTCTTTGTTTACACGTTACAACCTAGAG  
AAGTCTCGTCATTCTTTGTTTACACGTCCTCAACTAGAGAAGTCTCGTCATTCTTTGTTTACACGTCACAA  
CTAGAGAAGTCTCGTCATTCTTTGTTTACACGTCCTCAACTAGAGAAGTCTCGTCATTCTTTGTTTACACG  
TCACAACCTAGAGAAGTCTCGTCATTCTTTATTTATACGTCACAACCTAGAGAAGTCTCGTCATTCTTTGTT  
TACACGTCATAACTAGAGAAGTCTCGTCATTCTTTGTTTACACGTCCTCAACTAGAGAAGTCTCGTCATTCT  
TTTGTTTACACGTCACAACCTAGAGAAGTCTCGTCATTCTTTATTTATACGTCACAGCTAGAAAAGTCCAA  
TCATGTTTTATTTAAATTTCAATAATTTGCTGATTAAGTTTAGAACCATTTATTTACGAATAAAAACTAA  
CTCATCTTTTCATCCAGTTTAAAGACTTGTTTGTCTCAACAGTCCGATATGTTGTAGCACCTAATATGCA  
CAAACGTTTTAGTTTAAAAAGGTTAAACCTTATATTCGAGACTTACAGCATGAATAGAGTACGCAAACTC  
AGAATTACATTTTTATCACTAATTTATATTATATATGATTTTGTGGTTATTTTAATTGCAATTTCACTA  
AGTATTTATGTTAATGTTTTTAAACAAAAACATTTGCTCACATTTAAATCCACGAATGAAACCGAACTGG  
TTCGCGTCCAAAATACTTCTTTTTTATCAATCATTCTACAGTAACCTAAGGTGTGTAGGTTTCAGAATTG  
GACTTGGAACACACGATACATTAATTTTTCAGGTAAACATTTGTTTAAAAGAAACGTCTCCGTGCAGTGAAA  
TAGAAATACTTCTTAACTAGATTTAGATTTTTATTTTTCAAATAAACATCACACCAACTGTAATCTTTTTTC  
CCGCTGAATGAAGTTTGGATTATTTTCAGAGAAAATGAAGGGTTGTTTCGGGTTTCGAAGCCATGTTAGCTTT  
CTTAACGATGTTTTTTTCAATTCTTTTCGGTGTCGTCGATGATTTTGAAGTAATACCATTACACTGATATA  
TAGCACCTTTAGTGCATGTTAGAAAAATTAGAATATTGTAATTATAATAAAACAGAATATTGCTGTAATG  
TAACACTAGTAACACCTAGTATAATATAATCGACAAATAACCACTTAGCGGAGGAGTTTTACCCATTGTA  
ATAAAAAAGAAAAATGGTTCAATGTAAGATTGTAATTAGTGTGACTTGTAGGAACGCATATCATATCTTC  
TTCTTATTAGGTACATTGGTTAAAAAACACAAAAGCAGATGATATTTGGATAATATGATGGAGTACGTTG  
CTTCGTGGCATAGGTGTTAGCTTCCGGATGGTGTTAATGTGGTACCTCGTGTGTGCACAATGTTCCCTCGC  
CAGGAGTTTCTGGGTGATTAACTCTTTAATCATGTGCTAGATCGTTTGCATATCCTGCAAATGTAGCAAT  
ACGACAATAAAAAAGTTCTTTCTCTATCACAAACAGATATCTTGAGACGATCATACGGTGGTTGTAATTAT  
TATTTGTTATCGTCTGTCTTTGCTTGTGCTGGGTTTCAATTGTTTTGTTTCCAGCACATTTCTTTAGT  
TATCACAGCTCAAATATGACACTGATAAACCGCAACGTTCCGTACACAATAAAAACTTTTCAAGACACT  
GGTTTCACTCATTTCTAATTTCTGAAGGAAATTTATTAAATTAATGAATTCAGTTTGTAGACATAACAA  
ATTAAGAAATCTAAATGATAACGATGTAAACTACAGTGAGATAAATAAATGTAATGTTTTGGTTTGAA  
TTTCGCGCAAAGCTACACAAGGGTATCTGCGCTAGCCGTCTCTAATTTTGCAGTGTAAAGCTAGAAGGA  
AGGCAGCTAGTCATCGCCAACCTTTGGATTATTCTTTTTAACAACGAATAGTGGGATTGACCGTCACATT  
ATAACGTCCCCACGGTGATTTCGAACCGAGTACCCTCAGATTACGAGTCGAGTTCCTTATCCATCTGGCCA  
TGCTGGGCCAAATGTAAATGGAAGTGTCCCGGAATAATTTAAGTGACTTATAAATATTTCACTGGTTTAT  
AAAATGTTTTAATGAAGAAAAGGAAAGCGAGGTTAGGACTATTCTTCGAAAATAAATTTTAGGTCAAGATAC  
AATTTACTGACATGTAAATTTATCCCTATATATATGATAATATTCATTAAATATAACGAAGGTATCAAGG  
TTTTAATTTACTCAGAAAATGCTGTAAACAGTTTACTTCACTGACAACGAATTAATAATTTGTTTAGTTTA  
GTAAATTAATACTTGTAGTTGTTTTAGCGACCTTGAAAGAACTGAAGTGAATTATTAATTTTTTCATT  
CCACATTTTATAAAAAGAAATATTACGTGAAATAAACCTCTCTTCCTTCAATCGTAAAGAAATATTAAGCAG  
ATTGGTCATTAATATTAATACTGATAAATGTTGTTTACAATTATCTACCTTATGACGAAACAATATTTTA  
CATTTCTAATATATTGAAATACTATTTTCAGCCTTTGGTTCTTTTCAGCGCAGGCCCGGCATGACTAGGTG  
GTTGAGGCGCTTGACTCGTAATCTGCTGGTTGCGGGTTCCAATCCCCCTCACACCAAACATGCTTGTCTCT  
TTCAGCCGTGTAGCGTTATAATGTGCGATGCTCAATCCCACCATTTAAAAGAGTACCCCAAGAGTTGGCG  
GTGGGTGGTGTAGTACTGCTCTTCTACTCTTACCCTGCTAAATTTGGGACGGATAGCGTAGATA  
CTTCCTCGTGTAGATTTGCGCGAAATTAAAAAATAAAAAACCTTTTCAGCGCAAAGCCTCAGCAATAGAGCA

ATAAATCTGAGCTTTGTAAACCCTTAAACTTGTCACTTACACACCGAGGTACAAAACGCTTATTGTACAT  
ACACGTACTGATTACAGTTTCATAGTGTGCAACTTATAATTTTGTGTAAAACAGTTTCTTGTACATCTAA  
TTCACAGTCACTGAAACGTGAACTTTACGTGAGAAAACAAACAATTTGTTCTAATGAATATGATGCACCT  
TACAGTTTTATTACATCAAGTCTCCAGTGGGACAGCGATATCTGTGAGGAAATACAATGCCTCACCTCT  
TAGTTCAGTTCTCCCTGGTGGGCACAGCTGATAGATAACTAGTTATAGTTTTGTACGAAAAACAATCAG  
TTAACCACACTTTTCACTGAAACTGAAAATCTACTCTGTGACGTAGGGACCTATTGCATCCTTTGATTCTG  
CCGTATCATCTGATGTCATAGTGTGTTACAATTTCTCCTATTCAAGGCTTATCAACAAGGGTTGGATTAG  
CAAACCTGAAGAAATACAATTTTATATGGTTAGTTTCTACAGAAGTAAACAAGTGAATGTTTCTCAGATTA  
ATAGTTATTTTCAGGGCATTCTTCTCAGCTAATATTGTAATTTTGTGGTAATTAAGTCGTTGTTTAAA  
TTTTCGTTGGCTACTGAAATTTTCATTTATTGTTTTTAATATTGGAATATAGTGAATAAACTGTGTTTTTC  
CAAGGAATGCCTTCAGCAATATTCTGTTATACTCAACACAATGGGCTATGAAGTCATCATGATTAAAAAG  
TGTAGCGTACCTGAGGCTGATCCTATGTGTTTGGACCTCGGGTAAATATTTACTTTAGCAACGCCCATGC  
CCCCAGTGGCTCAGCGGTATGTCTGAGGACTTACACGCTAAAATCCGGGTTTCGATACCCATGGTGGGC  
AGAGCACAGATAGCCATTGTGTAGCTTTGTGCTTAATCCAAAATAACAATAACAAGCAATGCCCATACT  
CTAAAATTATACTTCATTAGTATACCACGTTAACAAAACATTTTAAACGACATAGAAATTTAAAAAGT  
AAAGAGAACCTTGTCAAAAAATACAATGTGTACAATTTTTCTGATATAAAGATTAATTAATACTTTAGC  
TTGATGCATCTTCTGACACTTCTGTTATTGAATGAACGAGACTACATTTGATGGGTATATAAATCAGGGA  
CAAGTGTAATATAGATACACAGTGAGAACAGTAAATACTAGTTATTTATGGAAATGAAATACAAATCCAA  
TAACCTGTGCTCCTTTGAAAGATGGACCTTCTTCTTCAGTTTGCTTCTGAAAGAAGAAAGTCCACCTT  
TCGAAAGACCTCGGGTTATTGGATTTGTATTTTCATCTCTATCATTACGAACGTACGTGTTATTGTTTAA  
CATCATGAGCTGTTTATGGAATATGTTTATGTGAGTAATAACAACCTGTTGTCAAGAACATGGTAGGGTCA  
TTATTGTTTCTGTTCTTATATTATATATATATAAAACAGCTATACTAAGTTTAAAAGATATAAAGA  
CAATAAACGCAATTCTTCAGCGAACCCGTATTATTTGTTGCGGATCAATTTATTGATGTAAGTAATAAGG  
CTTAATTTGAGGTAAGCCAATGCCCTCTGTTTTCTCGGTGCCGCTAACAAGGACAATGAAATGCTATA  
CACTCCCTAGCGGTTACAATAAGCCAATTTCTAGGCAACAGTAGGTGGGAAGTGAATGTATTTACCGGC  
AGTTAGCCAGGTTGTTCACTGGCTTTGAACACTGGTAACGTTGTGCGTAAAACGAGAAAGTAGCGGGCGAA  
GCCAGCGTGCGCTAGTCGGTGTATCGACTTACCGGTTAACCTAGCAGTGTACAATTTTTATTGAATGTT  
ACACATTAAGATTGAGTTCTTCTATGAAATATATTAGGAAGCTTCTTTGTAATAAAACGACCACAACCTT  
TTTGATTTATGTAATGAAAATATTAAACTTTAGTTTTTCAACTTGTACTTCAGTCTGATTGAAACAACGC  
CATCTGTTTCATCCTCACAACTTGGACTCGCTTTGTTTAGGGACCTGAATTATAATTAATATATATATAT  
TTTTAATGATATTCAATTTGATTAATTTCTTTTCTTGAAATGTGAGATGGAATATGCTAGTAACGATAT  
TTATAAAATCCCTAAGTCTCCAAAGTCCACGAGAACAGGTGAGCTGATTTTGTCTCGTACTCACGTGTA  
AGTGCTCGTTCTGTGTTAAAATAGAATTGTACAAGTAGTGACCTGAATGATTGATCCATGTACTAAT  
CAACGAATAATCTATAAGCTTCGACTATCGCGCCACTATATTGATTATCACACATTATTGTAAATAGTG  
TCATTACGTCCAGTACATTTTTTTTTAGGTTTCTCTATAAATCAGTAAGTGTGTCAATTAATAGACCACT  
TACATTTTATATTTGAGTTTCTACAGCTACTTACGTCACTTGTGACGAGTAAATGTTCTATTGTTTCTT  
AGTTGTAACGTATAAATCAAACGTGTTTATATTTAGCAATATTAGTTTACGAGGACTCGTTTGTCTTTCT  
CTCTTCTTAGTTAATGTACAATTAACAACCTTTCAAAGTACACACTGTATATCGAAACGTGTCGTTTTTTT  
TTTACATCTGTAATGAAATTTTATTTGGATTTTCAAACCTGGGAATCCAATCACAATGCAAGAAGCAACT  
AACAATACGTGTCACAGTACAATGTGAAATGATAGCTTTGTTACTTTGTGTCATGTCTTATGTTGGTAT  
ATTTTCAGTGGAATTTGTATTGAACAGGCTTTTCGTAGAGTAATAACGTTAGTGTTAAGGTAAAAGTGGTA  
AAACCTAATACCACTCTAGTGTATGGCTCCTTCTGAATAGCTTCTTTTAGAGCTAACATTTCTTAGGCGC  
CTAAGGTAAGTAATAGTTATTTATTATACATATATTTATTATTAGATTTCGTGACGAACCTTAGCTACAGA  
CTCTGGTGATTTCTTCACTAGAACGCAAAATCCTTTAAAAGAGCCGATTGTTTGCTGTCTCTGTTTAAA  
CTCTCTTTACATTGCTCCTGTATGTGTATATACTTACACACACACACAGACAGTGTGCATGCAGTCAGTA  
GCGGAAGTAAATTACTACCTCGTGAAAAGATGCAATATTGCCAGCTCTCCGTGCATTAAGCGAGGAAGGA  
ACAAAACCTGATATCAATTTCTCGCGGTACGTAAAAACAGTGCAGACAGCTCAGTGTAAGGACATAGTTGTA  
GGAGGAGGGTTGGCTCCGGTCCACGACACGTCACTGACGATCTCACCGAGGCTTGAAACAATGCAACA  
CCGTCACAAAGTACATTACTTTATAATGAAAGACCACGAGGTGATTTTGTGACTTTTTTGAGCCAGTACTG

TATAATCTAAAAAGGTAGTGTCTAGAGAGTTGCATCCTGGACTTGACGTAATGTTTCAGCGATCCATAGG  
ATGCAATTCTGATAAATTGTACTTTGTGAAAGCGATCGACTGCTGTTGTATAAGCATATTTAAGATAGTA  
CAAAATAATGAAGATGTTATTAAAGTGATATTAATGTTTCAGACTTCAACGCTGCTATTTTGTACAGAAA  
CAGTTTGTTCAAAGTAATGTTAAGTACCTCCCTTTAATGAAACGTAAAAAAAAGGCGTATTACATCATT  
TTATACAGAAGGTGTTTGTATGAAGCACAGGACATCATTTTATACAGAAGGTGTTTGTATGAAGCACA  
GTACATCATTTTATACAGAAGGTGTTTGTATGAAGCACAGTACATCATTTTATACAGAAGGTGTTTGT  
ATGAAGCACAGTGCATAATTTTATACAGAAGGTGTTTGTATGAAGCACAGTGCATCATTTTATACAGAA  
GGTGTTTGTATGAAGCACAGTACATCATTTTATACAGAAGGTGTTTGTGTGAAGCACAGTGCATCATT  
TTATACAGAAGGTGTTTGTATGAAGCACAGTACATAATTTTATACAGAAGGTGTTTGTATGAAGCACA  
GTGCATCATTTTATACAGAAGGTGTTTGTATGAAGCACAGTGCATCATTTTATACAGAAGGTGTTTGT  
ATGAAGCACAGTACATCATTTTATACAGAAGGTGTTTGTGTGAAGCACAGTGCATCATTTTATACAGAA  
GGTGTTTGTGTGAAGCGCAGTGCATCATTTTATACAGAAGGTGTTTGTATGAAGCACAGTGCATCATT  
TTATACAGAAGGTGTTTGTGTGAATACTATAAATATAGTAATGTTTATTAATTTTTAATACGTGTA  
AGTAGCTAGTTACAGCCAATTGGTCACTTAATGATAGATAGTTTGTCTGATTAACTACTAGAAAAATG  
ACTGGAGTGACTGACACTTCTCGAGATTTAAACATTTTATTTTAAAAATATTTTAAAAATCATATCTTA  
AGTCATTTATTACAGCAAAAAAGACTTTATTTCTAACAAAATAAAATATTTATTTGGCTTCACGGAAAA  
TAAAAAGTTCGAACTTCAATTGAAATAGTTGCACGTGTGGAGCAGGCGGTAACCTCTAAACGTGTATTT  
TTTCCGTGTAAGAGAACTTGATTCTATTAATAATCGACTAAGTAACATTTCTTTGTGCAAGGTGTATA  
AATGATAGCCAGTGATTCACATTTTTTTTTACTCAGAAGCACTTATCGTCTTTCCATTTTCTTTGCAGA  
AGTTCTATTTTGTTCAGAGAGAGAAAGAACAATTCACTTAAGGAACAGTAACAAGACTTTTAAACACAC  
ACGTGTATGCAGTTAGTTTAAATCTCTCCTGAGACGATTCTTCATTCCACACGAAACGCTGTGAATTCCT  
TGGAATAGAAATGTGTGGCTAACTTCAAATGGGGCTCCCTGTAGTTGAGAGAGTTGTGGATTTTAAAA  
GGCAAAGACTTTATCCTCCAGACTTGAGCGGGTAGGGGGGATCTGTTAGGTGTTTAGTTCTCCTGTAAA  
AGAGAAAAAAACATGTATACTTTATTGGAGTGACTTGTTTCAGTATATTCGTTGTATGACCTAAAAGACC  
TGGCCAGCAGAAACCCAGTATGAAGCCCAACAACACATACAAGTGTATTCATAGGAAACGGATTCTGTC  
CCCCAAGAACTACTTTGTTAAATTTTGCCAAGCAGATTCTTAATCTTTAAAGTGTACAGCGTGCACGAGC  
TTTCAGTGTAATAACATAGCGTCTCTCTCTAAGCAGACCTTTCATCTGGGGCCCAACAGTACTCAAAAC  
TGATTGAAACAGTTAAACTACTGATGAAAGCAACGTTCGACCAGAGGAAGGGAGTGGGGCACAGCTCTCC  
CAAAGAGAAATTGACAATAAAACACTGGGCATATCATACATCACAACCGACTGACTCCACCAACAGTAG  
GGTTTTCGGTGTGAAAGCGAGACCTCTAGAGGTGGTTTTGTGCGATTATGTTGACCGTGTGCGCTCGTCA  
TGCCCTTTTAGCACGAGTTCAATAGAGATCTCGGCATGCTTTCTCAACTCTCTTATGGGAAAGTGGGTAG  
ACAACATGTTTAACTCGACTGTGCGAAAAGCAAATTTGTGATAACAGCTAATACAGTAGTTAAGGACGC  
ATCTGAATCATGTAAACCAGATAAATCAGGTAAAGTTTCTCTCTAGTATCATATACAGTTATTAGAA  
ACACATTTCTTTATATGAATGTTTACTTTGCAGTTAGTAACGATCTGATAAACATTATCCCAAAGTTTA  
ATATAGTGTTCCAAAACCTGGTCTCTATCCATACTGTTTTGTCTCAAACATTATATCGTTGGGCATACT  
TAAGATATTTAGTCAAAATAATCACAATGTTGGAATAATGAAAGAACCAAACATTTTCGGAACATACAC  
ATTTTGTACTCTAAATAAAGGTTAAATCAAGTTTTTTAAACAGTCTTATTTTATTTTAAACAGTCTTTTATT  
AACAGTATTTTGTGACAGACTTATTTTAAACAGTCTTATTTTAAATCTTTTTTTTTTTTACCAGAAAGTGA  
ATCTGCTGTTAATTTATATGAAATAGTTTCACTGTTGTTTCCCTCGCGGAGAAACATATTTTAGTTACAA  
ATTTTCCCTGCACGTCTCCTATAAAGTCCTATACTTCCCTCCGGAAGACAAGAAAGCATCTAAGCACG  
AGCGAAAGTAGGGGCGACTATTTAACGACTTTCCGAGTCACGCTTATTCAACAAATGTTGAGCGTCAAC  
CTCGTTTTGAGGAAAGTTTTTACAATCAAGTAAATAACTCTTGCAATTGAGTTTTCTTTTATGGTCTGTA  
TATATTTATTATCATCTGTGGGTAAACACTATCCTCATAGATATCACATATACAATTATAAGTAATTCTG  
TTATATATTTATTATTGTTTTGTTTGTCTTAGAAATTTACGCAAACCAATACAAACGATTCTATGCC  
TATAACCGCTTACGTTTGTAACTGAAAGACTAGAGGGAAGACAGCTGGTTATCAATACCCACTGCTACT  
CTTAAATTCCTGGCTGAATAATGTGGTTTAAATCGACCTTTGTATATTACACATACACACCCAAAGTGTGG  
AACGCTAATTTTCGTAGAAAGCCACGGACCTACGGCTCCTCAGCTTCGCTGTCCGGGCACGTGGTCTACT  
ATTAAGAAACTATTCTTCTTTTTGTTCTTCAGAGTTGTGAGCTCTGAAACATTCAATGTACTAACTCT  
ACTAAAGATTGTTTTACTTTTAGTGGACATCAATTA AAAAGCGTTTTGTGCGACTACATTCCATAAATAC

ACAACGTGATCACAAAAATAAAATCACACTTAGATGCTGGATATATTTATATTATATTAATAATCTAGCAT  
ACATATATCTTCAGAACTAATCAACTGTTTTCTGTATATCCTTAGAAAACGCAAAGGCCTTTTGTGAGC  
GATTGAAGAACTTTTCGTTTATTTACCTTTTCCTGTCTTATACCATCATATTCTTCTCTGTTTTGAAGCC  
AGCGACAAGTCCGAGCTGTTTATATTTAGTGTTACGAAGCTGAACGCTTATCTTGATACTTTAAACAATG  
GTTATATCAGCCAGAGTAGACTCGGCATGGCCAGGTGGGTAAAGGCGTTCGACTCGTAATCTGAGGGTCG  
CGGGTTCGAATCACCGTTCGCACCAAACATTCTCGCTCTTTTAGCTATGGGGGCGTTATAATGTTACGGT  
CAATCCCACTATTCTGTTGGTGAAAGAGGAGTTAGCGGTGTGTGGTGATGACTATCTGCCCTCCCTCTAGT  
CTTACACTGCTAAATTAGGGACGGCTAGCTTTGCGCAAAATTAAAACAAATAAACCCCTTATACGTAATTG  
TAAGAACAAAAAGGACCATAAAAACTGCATGTGCGAAAACGGGAAACCACAAATTTGCATGAACCCAAACA  
AACCTTCATGTCAAATTTGGCGGAGGTCTATTAAAAGTGACGAAGTAATAATAATAAAAAAAAAATCCAA  
AACGCCCATGAACTCAACAAAACTCATAACTGGAAATTTATATGTATCTCCCTATGGATCCATTGAACCT  
CCAAACCAAATTCAGTGAAGATCTGTCTTTCGGAAGTAATCTCTTATTTATTTACCTACAAGTAAATGGA  
TGTTTGTGATAAAAAACAAACCTACTTTATTCTAAGACTACGTGTTTATTCGCCAACGTTTTGTTTTAA  
TTTTTACAAATATTATTAACCTCCTCAGAAAAGCTTTGGTAACCTGCAGGTTCTCGGGTCATTGTTACCATT  
GAAAACGGTTACTCCGTTTTCTTAAAGTAACGTTTGTGTGGTAATTATGACTTTCTTATTTATCTAGATA  
CACTACATGGCTAAAAAGTATGTGGACACCCGACCATCACACCCGTATGTGCTTCTTGAAACCATGGGCAT  
TAATATGGAGTTGGTCAGGGCTCTGTGCAGACCAGTCAATCTTTTCTACACCAGCCTCAGCAAACCATGG  
ATCTCGCTTTATGTATGTCATGGTGAAAAAAAAAAAAAAAAACGGCCTTCCCCAACTATTGCCACAAAGTTGGAA  
GCACACAATCTCTAGAATGCTATTGTATGCTGTAGTATTAAGATTTCTCTTCACCGGAACATAAGATTC  
CAGCCAAACACGCTCATCCTTTTCAGTCGTGTTGGCGTTACAATGTGATGCTCAAGCCCACCTTTTCGTTGA  
TAAAGAGACAGTCCAAAAATTTGGTGTTAGTGGAGTTCACTAGTTGCATTCCCTTCTATTGTATCGCTTCA  
AACTAAGGACGGTTACCGCAAATAGCCTAGAATAACTTATTGCGAAATCCACCACGACAAAAACAAAA  
GTGAATCAAATGGCTTAATTTACGCATGCGCAAATCATAATATCGAATTTGGATGACTTGAATATTTGCT  
TCGTGTGATTATGGCAGTTACAAAGTTGTTAAAACGACGTTGTTTCTCTGTGAGTTGAATATTTTAGTT  
AAAGTTTCAAAGTTTTTTCTATTTTTGTTTCCTTATTGTAAATTTCAGCAGGGTTAAGACATTTGAAAA  
TTTCAACTTTATGTTCTAGCTCATGTTTTTGGATTTTTTACACGGTTCCTTAAGAAACACCTTTGTGAAC  
TATAAAAATTAACGTAATTCAACATCAAACCTCAGAATTTGGTACTGTCTTTCCACTTGCCCTATCTTAGA  
AGGCAAGTTGGATTTCTAGTTAGCTTGGGTACAAAGTAATTTTTACTGGACTTTTCATCAAATAGTCTCA  
CACAATACACTGACGTTTGTCACTTTTTGTGAAAATAATACTATAGTGAAGAATTTGTACATTATACGTAT  
ATTTTTAAATTAAGTGACAGTCCACGTCCCATGGCCAGATGATTAAGGCACCTCGACTCGTAATTTGAGG  
GTTGCAGGTTCGAATCATCGTCGCACCAAACATGTTTCGTCTTCAAGCTGTGGGGCATTATAATGTACT  
GGTAAATCCTACTACAGTTTGGTAAAAGAGTAGCCCAAGAGTTGGCGGTGGGTGTTGATGACTAGCTGT  
CTTCTCTCTGTATTACACTGCTAAATTAGGGACGGTTAGCGCAGATAGCCCTCGTGTAGCTTTGCGCGA  
AATTCAAATTAACCAAACGCATTATACTGTTATATTTGACGGCCGTACATCTTGACAGTTGTCTTGCAG  
CATACTTTCCGTTGCAGAAAACTCGTCATAAAGCTTTCATATTAAGTGCAACGCTGCTCCATGTGTG  
CTTTCTATAAGTAGAAAAAAATTACAAGGGCAATGGTAAGTAGTGTGAAACAAAAGCGTGAATATCTAG  
TTTATTCCTCAGCTTCTCGATGCCACACTTTATTTTTTACTTAGATTGAGGCACGACTTATTGAAGTTCT  
CTTTCTGGGCACTTCTGGTTTTCCGAAACTGATACATATTTCTTTTTTTCCAGTGCTATTAAAGTACAAAA  
ATAACCCTATCTTGAAAACTCTAAATCCTCGATTTCGACACAGCTTTACGATGTGAGTGTATAAATATGT  
GGTTTTCTAAAGAGCTGTCTTATCTTTTTTACAGACCGATCGGTTTTCTGTGGCATCAGATTCTCACGAA  
ATGTTAAGCAAACACAAAATGTAGTTCTGATACATTCCGTTGCATCGCAACTTCATATTGGCTTTGATTG  
CCAGGCAACTTGGTGATTTTCATACTAAAAACGTTCTGATATAATCACTCAAGCAACCGTATAACGCGA  
AACTAAGTTATTAAATAGCTCTAACTTGAATCTAGCAAAACGTAGAATATCTAAGACTGTAAATAAAATA  
TCGGTTATGTAGGAACATTTTAAACCTTTTACAGGTATCTTCAATTAATCGAGTATTACGAAACCTGGC  
GGCTCAAAAAGAACAAACAGTGCATGCACAAGCACAAGATGCTGTCTATGATAAACTACGTATACTCAAT  
GGTCAGGGATGGCCTCGCCCAAAACCCCTGGTATCCTGGTAGTGCAACATTTGGTGGAATAACCCCTGCTT  
CGCTCCCTCTCCAGTGACTGCTCCAGTCTCCCTACCGAAAATGGACAAATTCAGAAAAAGGTAAGAA  
ATAATTTTATATATCTCCCAAGATCATATAAGTGTACATGATACTAAGTTATTTTTTCCCGTTCCATGAG  
TATTTTTTTGGGTAAAAAAATTCATAAAAAATGTGTGTATTTTGTTCGAGTATCATCAAATAACTCAGT

GAAAGTAAATCAAAAGTATTGAACTTTGCATGAACTGACTAAAGTCAGATTATATGTGTTTAGAATCATG  
TGTTTAGCATTAAAAACGTGAATTGGATTTACAGTGACACATACGCGAAATGCCAGGTGAGGTATTCCA  
AGGCTAAAGTATATCTAACCCCTAATTTTTTAAACTAGGATGGCAATCATTGAGCGTCAACCGCCTACTGTT  
CATGTACTTTTAACCGAATAATTCAAAGCGTGTATCATGTTCAACGGCTGATTTGAGCTTAAATCTTGG  
ATATTTTGATTGTTGTAACGCACGTTAATACTGTGCCACGCCCAGCTCATTGAAGTTATATGAACTATA  
TAGTGGACAATAGTGTGTAAATTATTTAGAATTTTTTCGCCTGTAAATCCAAAAACACGCACTTATATT  
GAGCATAAAATTCGAAAATTTTCGGGCATAAGATTTCAAATAAGTTCCTACGTAATGATCACGCACTATA  
TATTTATGCATACCTTGAATAGACGTGCATACGTTTCGACAGATACATGATTAAAACTGTTTTTTTTTTTA  
AATTCGTAAGTATCATTTTAGAAAAATGCGGTTTTCAACACAATACGTTTTTGTCTCTACTTCAACAACA  
CCGACAAGACAAAAATAAATGTCCTTAGAATAATCAGTGTCAATTGCTAGCCCAAACAAAACTAACTTTCT  
GTTTGGGGATCTAACAAATATAAAAAAGTCACTTAGTGAAGAGTTGTTTTAGAAGCCTTACTTTGATTGTA  
ATGCTCTGCGCATTACCTGAATAAACACTGTGTGTGTCTGCTTAGACAGTAAGGGCTTGTGTGCTCT  
TATTGTTCTGTCTTCGGCATCTCGAAAGGTAATGTTTGCCTAAAAGCATCTACACACTTATGCATATGCA  
TGTCGGAATAATACGTTATCTGTGCATAGAACAAATACACGTCACACATAGCGTGTTTTTTATTACTATT  
ATCTATGATAATTGTGTATTGATACTTTTGTGCTGTGATGTGCGACGTTAATAGTTTGTATCTTGT  
TCGCAACTTAATTCATTCTCGTGTGATTAATTCATTATGGATATTTTTTTATTCACCTTGAATAGGCTTT  
AACTGATTTCTATAACTTCGTATCAAAAGATACTACTCGTGTGCGAAGTTGCAAATAGCCTTCAACATGTT  
TTATAACAGCGTTTTTCGACATTTACAAATATATGTTAACAGATTATTTAATAACAAATCGGCAATGCAAA  
AGTTTTCATATGGGGTAGCCGGCATGGCCAGGTGGTTTTAAGGCATTTGACTAGGAATACGAGGGTCGCGG  
GTTTGAATCCCGTCACACCAAACATGCTTGCTTTCCAGCCGTGGGGGTGTTATAATTACGGTCAATCC  
CACTATTCTCTGGTAAAAAAGTAGCCCAAGAGTTAGCACTGGGTGGTGATGACTAGCTGCCTTCCCTCTG  
GTCTTACACTGCTAAATTAGGGTTGCTGTTGTTTTGAGTTAAGCACAAAGCTACACAATGGGCTATCTGT  
GCTCTGCCACCACGGGTATCGAAACCCGGATTTTCAGCGTTATAAGTCCACAGACCTACCGTGAGCTAC  
TGGGGGGCACTAAATTAGGGACGGATAGCGCAGATAACCCTCGTGTAGCTTTGAGTGAAAGAAAGTTAAA  
ATACAAAAACAATCATATAGGGGGGTACTGCAAATGATGTTTTACACATTTTCTGACAAGAACTGTATTA  
ATCTTTGCACTGTGCAACAGAACACGTGCTTTTGTCTGTGTGACTTACAAGAGACAAGCTAAATCTGGA  
GATAATTCTATTGACTTTACACGGGTAAATATATGAAATGAATTTGCATCCTAAGTCTGAAATGAATAT  
TAATTCTCGAATGAAAAATCGTGGACAAATACTGTGTTGCACTAGTCAATATACACTGAAATGCTTATAAA  
TACGTATCCAAACCAGATAACACAGCAATGATTTTCAATTTGTATATTATAACACTAAAAAAGGTGTTGAAA  
GCTAACATACCAAAAAAAGTTCAACAATTTATTTAGCCATTAGTTGTGTATAATTACGTACCACGTCG  
GATAGTGGTGAAGATAGTAGGTCTATTCCAGTGTGTTTTGTTTCATACACGTTTTCGGGATTGCATTTTAAA  
ATATTTTTTACTTCATTGTTTTGTGATCTCTGACACTTTTCGTTCAATTTACTCATGCTGATTTAAGTTTT  
CATTTTATAATTACTAGTCTATCTCTAATATTATAATATGTGTATGTATAAGGAGTTAGGCTTTCCGCAC  
CAAAATGAAGCAGTTTTTATGTTAGTCTAGTTAAATTAGTTTTTACAAGTAACTAACAAACGTGTATA  
AATCAACCGCAAGCTTTAAGGGTTAAGTGTAGGTAAATTAAACAATTCTTTTTTTTTATTTTCTAAAAATGG  
AAATATATAATGATATATACATATGTTTCTAAAGTTCATTAAAATGTAGGTAATGTCTCTTATAAATGTC  
TTGCATGCATATTTATTTGTAGGCTTAACAAATTAATAAAACAGTGAACAGACGTTAATTCATTTGG  
GTGTACACTAGGGCAAAGACAGTGGTTGTTACTGTCTTCTAGGGTTTTATTTTATTGTAGTTTTATATTCA  
TGACCAGGATTATCTACTATCGTCCCTAAATTTAAACTACTAACTTGAGGAAAAGCATGCATACCAACAA  
ACAATCGACGCTAATGGATTAAATTATCATTTTTTATAATACACTGATATCTTAAAGCGTGGGGAAAAATTTT  
GTAATACAGTCATGATTCGAACCCCGCTCACCTGCTCCAAAATCAGAGATCTCCCGCGTGATCAATACGC  
GCCCTCAGATCTTATTTAATTGTTTGTCTCCAGTATTCGGACAAAACACCACCTTTTATTTGTATATTCA  
AGTTAAGATATATTTCACTATTGCATTTTCTTTTTTTTACAAATTATCTGTGGGATAATATTTTGAATAGC  
TCCTCCACGTGCTTGTCTTTTTTTTTTGTGAGTGTGATATCACACTTGAGTTCCCGAGTGGCACAGCGGC  
ATGCTCTGCGGGCTTGTAAATCATAACAAAAGCGTACTTTGCCATTATATTAACAATAGAAAAACAATAA  
GTTAATGATGAGGTGGGGTTAGTATTTAGCAGTAAACTGTTACTGTATCAGCAGGTGGTGTGTTTTTGG  
GTGTAATGAAATATAAGTTATTCAAGTTGTGATTGTTAAACATTTTACACTAACTAACACTGTACACTAC  
TACAACAATTAAGAAGAAACTATTCAAGTAAAAACCTGTATTTGTAAAGTTAGTAACTAAAAAAACTTG  
TATTTGTAAAGCTAGTAACTAAAAAACTTGTATTTGTAAAGCTGGTAACTAAAAAACTGCATTTGT

AAAGCTGGCAAAC TAAAAAACTGCATTTGTAAAGCTGGTAAACTAAAAAACTGCATTTGTAAAGCTGG  
TAAACTAAAAAACTGCATTTGTAAAGCTGGTAAACTAAAAAACTGTATTTGTAAAGCTGGTAAACTAA  
AATAAGTAATGTTTGGCACCTCTCGCAAGATCTTGTGGCGGAAGTATTAGATAATATGGTAAATGTAGCT  
GAAAGTCTGATAAAGAATGTTTATCGAGAAATGTATAAATGTAAAGCATTTACACGTGGATATCACCTGA  
AAAAGTCTTCTTCAATGAAGACTATGGATTGATCCAAGTGGAAAACAGATAACCGCTGACCGATTGCTGT  
TAACGAGACCGTAAACTATATATATATATATATAATTTACTGCCATGAAAGAAC TTCTTACTATATATGT  
TCTACCAATTATATTACATCATTGTTCCATATTTAGCAGTTACTTCAATCTACAGAAAAAGTTTTCGTAT  
CATTAGCCCCCTCTTTTTGAGTATTCTTTTTTGGTATTTGCCACACACACGCACACACAAAGAGTATAATG  
GAAATGATTCCAGAAGTACACGACTGATGCACACACGGGAAACACAGAGAATGAGCGATGGCATATTTAT  
TGATTATACAAAACGTTTTTCATAGAAAATACCAAACAAAAATGATTACGTTGAACATTTGCTAATTTGCA  
TGCGATTCTTTTATGTAAAAGAACATTGCATCTTGTTTTAACGTCTTCATACAGATTATCGGTGTACATT  
GTGGAATACTATACCAAATGTTCTGTATTACAAGTTGAACCTTCTTCAATACGACACGTTCTTAAAAGAA  
TGATGTGCTGGAGTAAAATCTGCCTGCAC TTTTCAGCGGT CAGAGTGCCATCAATCATCTGTAGATCGTA  
TACTGAGACGTATTCTCAAAC TACTGTCTCCCACTGTAGATGTCACTGACTGCAATACCCACCCCAT  
TCTCCGTCATCAAATAAACTGTTGTTGGTAGATGATAAAACAATTAGGACTTAACTGACCCCGTTCTCCGT  
CATCAAATAAACTGTTATTGATAGATGATAAACAGTTAGGACTTAAATGTGTCTGTAAATAACACACGAT  
TACTCATTTCACTATTTGTGACCAGTTATCTATTTTAACATTTAGGATTGGTTACTTCTGTTTCAGGCAG  
TTTTTTGAAATCTCTTCATGCTAATGTTTTACTGTTCTAGAGATAATAGTGACACTACTTTACAGCAAATG  
TCGTTTACAAGATCTGCAACTGACTTCTTTTTCTCTTAAATAACATT CCTCGGTGTTAACGCCATTTTGAG  
TAGTTTTCGGTTTTTACCTATGTTTCTTCTTTTATAAAGCGTAAATTAATTTTCTCCTATCTGAGACTCAT  
ACAAACCCTACTGCAAAATAGTCTTTTTTTGTAAATTTGGTGCATAAAGTATAC TT CAGCAACCAAATCTTT  
TTCGCAGCATTTT TAGTTCTGGGTTGGTTTTGGTTTTTGGAAATTTTCGCACAAAGTTACTCGGCTATCTGTGC  
TAGCCGTCCTTAATTTAGCAGTGTAAGACTAGAGGGAAGGTAGCTAGTCATCACCACCACCGCCAAC TC  
TTGGGCTACTCTTTTACCAACGAAAAGTGGGATTGACCGTCACATTATAACGCCCCCAGGGCTGGGAGGA  
CAAGCATGTTTGGCGCGACTCGGGCGGAACCCGCAACCCTCAGATTACGAAGCGCACGCCTTACGCGAT  
AGGCCATGCCAGACCCTAGTTCTGGGAGACACTACTGGACAATTCTACTAATAGTGGGCATATTATGAGT  
GTCTACTTTTATATGCATGTTACCGATGTGGCACTTTTCGATTGGTTAGATGACAACCAATCACATTGTG  
AATTATCATTATGTGATTATACTCTGCTGCAGTTCATTTTACACAGTAAATGATTGGCATTTCTTTATA  
TGTAATAATATGAATACATATATTATATGATCTTTAGTTTTTATCTTTTTCCATAATTAATATTTTCTGC  
ACTGGAGTCTACGTGCTTATAATTTTAAATAGATCTCCGATACCTCTAGTGGACAAAGCGTACTGTTTCAT  
TATATAGCTTTGTACTTATTAACAAATATGATTGGTTTTAAGAGAGACCTCTATGAGGAAC TTGTTAGCAA  
TAGGAATTCATTTTGTAGAACGATAATATATAAACACAGCCATCAGATTGAGCATAACTGACAATGAAAG  
ACGTATTACTAATACAGCACATGAAGTGCAACTGTTGTTATTCTGAAACACGAATAACTTGTAATATCAA  
TGGTGTTTGTAGCATAGCATTCAATATGGAGCAAATGTAAACGTTTTTTTTCATCCGTTTCGTTTTATAT  
TCTTTAACCTCATCTTCTGACATACGTTCTGAGAAGCAATAGTCATAAACTCAAATGTTAAGTTATAT  
TCCATGTAGATTTGTTTAAACCAACAGTTTTCTTTGCACATACTGAACAATGGAACATGAAC TTGTATAAT  
CGAGGAATTCAGGTCTCAGTATTAGCTGGACAACAGACCAGAACATCCCGTAGTCCAAGTGTCA TTTTAT  
GATATTTTGCACATCTTCTAGTGATACTGATT CAGAATCTTAATGATGACTCCTTGCCATTTTTTCAAGAT  
ATTAATAATATCCAAGATTGTTTGCCAAGATGGGTTATCTCGATATACAAATGCCAATATATTGGAATCTAT  
ATAATATAGAATAATGATTTTGGTGTATATTACTGGGTTTTTGGGGTGAAATGTTTTTACCATTTCGTACTG  
CATAAGGAATGCTACTTTGGTACCTTTGAGGAACTGT CATATGTGAATCTAATACAATTTTTGACACAA  
AATTTATTCTGCTTAAGGATCACGGGCTTGGTGATTTTCGCGTGACGTAGACCTGCTAAATGTGTTTCATCG  
TGACTTGAAAACCTGTGTTCAATGTCTGAAGATATTGGCAATATGAGGACAATCAAAAATAAAAGG  
TCACAGTCAAAAAGGAAAAC TTTAGGTAGAGCAGCCAGTTTGACTTCTGGATAAACCATAAAGTAATTATC  
AATGGTGGATGTATTTTTTTTATCTTCAATTGGACTTTAAACGATACATTTCAAACCTTTGTGATAAAT  
GCTGAAAATATATAACTAGTACACCATGTGTACGGAAAAAACAATTCA TTGGTATAATTTGCCAATAA  
CTAACGGATATAAAAAGGAATATTCCACAATTGAAGGCGTCTTCAATCACAGATTGGTAGTGACAAAATC  
CAATACTGTACCACAACAAGTCAGTATGGAAC TACTCAATGCCTGGACTGACCTGTAGATTAGTAATAAA  
AAGGCACATGCTATAATACCTTAGTAAATGGTAGTTGTTACTACCCAGAGAGTTAGATGAATAATGGTGA



TATATGATGACATTGGTGTATTTCGTCACTACTGTTTGCTGAAGCTCCTATCATTCTCTTTTCTAACGGAA  
TGGACCTGATTGTATCGAATAATGGTTGACACAGGAGCAACAGTGAAGAAAATTACAACCTGTTGTTTACA  
GTGGTGTAAAGTTGTCAGCGTTGGAGACGAAATATATACGAACTATTAACCTAAGCAACTGCATTTGTTG  
TAGCATATTATAAGAACAAAGACACGAGTTGTATGCCTGATATTTGATATGCAATATCTTTGCCAAACCT  
GCGAACATTAACGTCAGTAAATGTTTAAAAAACTTAAAACTTACATTTAGAAATCTGTCCAACCTTG  
ACTTACAGGTTTTGGGTAGGAAAAGATACAGATCGTATATCTGTGTTGCGCATCACGATGTTATCAGCGA  
TGCTGTTGTCTTCAAGTGATTCCATCTGAGAAACCTCGTTGACCAGAACTATGGGCGGTAAATAGCT  
CATTTAACTTGACACTCTTCTGTGGTTGTAACGTGACAAATAGTTTCCAGAATTGGTGGACAAAACGAC  
ACGAAGCCAAGTGATAATCATTTTCAGCAATTGCCTTTGAAAATAACTAATGATACAACCTGATGTGTGTA  
CCAGCTGATCAACTCACAGATGTAGAACTGAAAACCTGACGTGTGTACCAGCTGGTCAACTCACAGATCTA  
CAGTTCTACTAATACACTGAAAACCTGATGTGTGTACCAGCTGGACAACCTCACAGATCTACAGTTTACTG  
ATACACTGAAAACCTGACGTGTGTACCAGTTGGACAACCTCACAGATCTACAGTTCTACTAATACACTGAAA  
ACTGATGTGTGTACCAGCTGGTCAACTCACAGATCTACAGTTCTACTAATACACTGAAAACCTGATGTGTG  
TACCAGCTGGTCAACTCACAAATCTGCAGTTCCTGATGCACTGAAAACCTGACGTGCGTACCTTCTGGT  
CTTCTCAAAATTTACAGTTCTACTGATACACTGAATAATTTAATCGTTTCAGTCCGATGTATATCTGTCA  
TCAGTCGTCTTTCATCAGCCTTTTATTTATAAAGTCCCTAGACACTGCATTTGGTTACCAGTAATGGAG  
AATTATCGTCTTTGGATGACTACTGGTCATCTTAGAGTGGTTTAAAAATTCACGAATATTGATTATTCCT  
ATGGTTATTCCTATAAAATACCATCATTTAGTAATTCTACTTGTGTATAACTATCTTATTCACACACAAT  
AAAAAAACCCAAACAAACACCAGAATCAGAATTTTCTAGCTTACCAAAGAAACGATTTGTTTCATTCATGT  
GTTCTTTTGTTTTGTTTTAAAGTATGAATGGTAGATTTTAAACATTAATGATCCTATAAGTAAGAGAGG  
TAAGCAATGGATTGTCTGATCCACAGACTTAGTTAGTCATAGGTTTAGAAATAGCACATTACTCAATAC  
ATGAGCTATGTTTGATTAAATTCATGTTGCAGCTGCCATCTTGAATATTTTAAATCCCTCGAGGGTGCCG  
AGATGGCACCCTCACATCCTCAGAGATATAAAACAAAACAACCAAAACAACAATAACTTTACTTAAA  
CTATACTTTTATGTTTGGGATGGAATCGCGACTTGGCAACCCGACTATAACTTGTTAATCCGTGAGAAAC  
CATACAAAGATACAATGTAAATTTACAATATACACACATATAGGCACAACACAGGAGTATAGAATAAT  
TATGTTTTGAAAGTTTTTCTTTGATGAAAGAGAAATATACATAATTTTTTGGAAATGATTCTGAGCATAAC  
ACCATTTATGGATGTAATAAACTTTCTACATATTTATATATAATAACGCCCCCCCCCGGCACAGCGGTAC  
GTCTGTTAATAACTGGTTTTGATACTTGTGGTCGGCAGAGCACAAACAGACGATTGTGCTTAACTTCAAA  
CAAACCTGTAAAGTAACCTTGACTTTCTGAAACGCCCCCTGGTGGGTCGGCAGCAAGCTTGTGGTCTCAA  
AACGCTACACTTCTGTGTTTAAAAATATACATGTAAAAACGGCTCGGTTTGGGTTGATAATTTTTTTTACG  
TAGAGGACCAAACGAGCCGTTTTTCACATATATATTTTTGTCTACAAGTGGGTTTTCTTGACATCACTGAC  
TTCTGTGTTCTTTGGAACAGCTCAGTTAGCTCATTGTTTGGCTTTGTGTTGAACAACCTGAATAACAAA  
CAAACATCTTGAAGAAGAGGAATACTATATAGGGTTAAACACAAAGAAACACTTTCAAACCTAACATGTG  
TGAAATACAATAACTCTTACCATATGCATACGAATTTGAGAATTCTGTTTGTTTTTTACTATCAGTAA  
TAAAAGGCTTAGATTTATTCATTTTAGCAATAGCCATTTCAATGAAATTACGTTAACTTTGTAATATATG  
TGAAATTCACGCAAGACACACAAACAACTTCATACAAGAAATGCATCTGTCTCTTTTCGTTATCTTTCTC  
TATACTTTTGTACTTACACATTTTGTGTTGAATGTATATCGTAAATGTACATAATGAAGTTGTGCGGGTTA  
TGTATGAATGCAATTTTTTTCTGAGTTAAGCGCTATACATGTTATTCGTGGTTTGGTGTCTAAGTACAC  
ATCGTGAATTGGTTTTTGTCTAGATTAATTAATAATTAAGACACGGTGTATTGTACTATATATATAACCT  
AATATTATTCACTTATTTATATAAACGCATAACATATATATATATACACAGTCAGTGTGTTTGTGTTTCT  
TTTAACTACACGCAAAGCTACACAAGGGCGGTCTCTGCTAGCCTTCTTTTATTGAGCAGTGTTAGACGA  
GAAGAAAGGCAGCCAGTCATCATCAGCCGCCGCCAACTCTTGGGCTACTCTTTCACCAACAAATATTAAT  
CCTCATATTATAACGCCACCCACGACTGAAATGGCGAGCATGTTTGATGTAACGGGGATTGGAACCCGCA  
ACCGTTAGACTGCGAGTCGAGCACCCCTAATCACCTGACTATGCCGGTCCGCAGTGTGAGCGAAGCTTTAC  
ATCACGGTTTTTCACTCAAGACGCTGAGTTCATTACTAGTTTTAAATACAATCTTTTTTCTTAAAGTTAAA  
TTTCTTTTACCGCAAAGAAAGTTGAGTGGTTTATAGTGAAACAATTTTGAACAAGCAAAATAGTAAGTCAT  
AGCCGATATAAAGCAGTGGTGGAAACAAGATGTATCAGAAGTGTATTTTTTGACACATTTTGTGGTACGTA  
GTATGACGCGACTGAAAATCGATCACTTTTAAAAAGAGTATGTAATAGGTCTTTTCCGACGAAAATATTC  
ACACACTCAGATCATGAAAATGTGTTTCAGTTTCCGGAATTATAATTTCTGAGATTAAAAATATCTCTTATT

CTTATTGGCATTGGAAAAACAAACAGATACGAACCAATTTGCGACTCCAAAGACATATACAAAAGGGCTTG  
GCATGGCCTAGCGCGTAAGGCGTGCGCTTCGTAATCTGAGGGTCGCGGGTTCGCGCCCCAGTCGCGCCAA  
ACATGCTCGCCCTCCAGCTGTGGGGGCGTTATAATGTGACGGTCAATCCCACATATTCGTTGGTAAAAGA  
GTAGCCCAAGAGTTGACGGTGGGTGGTGATGACTAGCTGCCTTCCCTCTAGTCTTACACTGCTAAATTAG  
GGACGGCTAGCACAGATAGCCGACTAGCTTTGTGCGAAATTCCAAACACCAACCATATACAAAAAGATCT  
GCAACAGGTCATATCTCTGTCGTGATATGGGCAAAGACTCCATGAACACAGATGTCAGCGACAAAAGCTG  
TCCACGTACTCTAAGCAACAGTACGCGACATAATCAAGAAGGATCTAGTCTGTAACAGCGTCACAAGTCA  
CACGTATACAAGGGTTTTTCATGACATATATCGTCAACAGTTCTATATCTCAAACAACGGGAGAAATCAGT  
CGGATATTCCCGACATTCTATAAGAAAAAATCCATCAAGTCGCTAAAGAGAGCGCCTATTGATTTGTGT  
GCAAATACATTGTTTTAAAAAAGTGTTGCAAAACCGTCACCTTGTATACCTAGATAGGTTATGGAAAGGA  
AGCAGGAAGAAATAGAGTGCTTTGGACATGACAACCTTACGTTGATGTCTTTTGCAATGGAACTACTTT  
GCAGAGCTATTGTCAAAATGTGAGTTAGAGCATGAACAGATATAGCGACGTGAAATGTAACGACGTGGCG  
AGATTAAAAGATCGTTTTAATGTAAAGCATATTCTCAACTTACATATAAATATACTGCTGCACTTTATAT  
TTGTTTATGGATTATCCATTCCCTTCTTTCACTTATTAGGTTTCTGGGTAATGTTCTATTAAAAAATTT  
TTGAAAACGTTAAAGTGACCTATAAATCCGCTTGTACATTTTCACTAATTTATAGTGAAATATACGTCT  
CTAAAGAGCATTTGAGTGCGTGTGTGAAAGTGTATATTGAAAGGAATTAATTAAGGTTTAAATTAATCTA  
GACAAAATCAAGGGTTTACAAAAAGGGTTTTCAACTGTTAAAGAAACAATTTGTAAACACATAGAAAAAC  
TTTAGTTTACGAAATAAATCTTTATTTTTTGGTTTAAAGCATCTTATTACAGGGAAATCTTAACTAATAGT  
TGAAACTGTGAAACCGTATTGTTTGATAATACAGACTATTTATTTACAGATCAACTTTTAGTCGACTTTC  
TGTTTGTGTTGTTTTTTGAATTTTCGCGCAAAGCTACACGAAGGCTATTTGCATTAGCCGTCCTTGATTT  
AGCAGTGTAAGACTAGCGGAAGGCAGCTAATCATCACCAACCAACGCAACTCTTGGGCTACTATTTTC  
CCAACGAATACTGGGATTGATCGTAACATTATAACGCCCCCTTAGCTGAAAATGGGAACATGTTTGGTGC  
GACGGGGATTTCGAACCCGTGACCGTTGGATTACAAGTTTCACTGCTTTAACCACCCGCGCCATGCCGGGCA  
AGTTGACTTTCTAGTAGAAATTAATTACCTTTGTAGCAGAAGTAAGTTGACTTAGCAGTTAATTATGTTT  
TAAATTAATAAGTTTGTGTTCAAATTAGCAAGGAAATTAGTTGAATTTCCATTGGATATTATAATAATTA  
GTTACCATCAGTATTTAATTGATTTGACAGTAAATTAATTTGGTTTTCCAGAGAAAATAGATTAGTA  
GTTACCTTGGTCGTGAATATTAGGCATTTGGTAGTAGGAATGAGACAGCTTGTTTGTATAAATCTCCAAA  
GTAATCCTGGTAGCACAAACAGACTCAATGCAAAACAAATAGAAAAAAAATGAACCTAGTGTGTTCTTA  
AACTGGATCACCGAGCTGACAAATAGTGACAATAAAACAATGTTTTATTGTTGTATTGTTTCTACTGTA  
CTTCGTTGAGTTGCTACATAAAATAATATGTATAAATGTGTGTTAATTCATAGTACATTTGTTTTAACT  
TTGTAACCTCCAGTATATTTTTCAACTAATCTACTGTGAGCATATTTTCTGTTTAAAGTTTCAAAGAATCT  
TTTACCTTATTCAATTGTTTGCACACATCTGTGTCAAGTTTCAATATGATAAGCCCCTAAAGGAACACA  
GAGCACACCTGTGTTTGGGTCCAGACGTGGCAGACCCCTTAGGGGTGCAGTAATATCAAGATGACAGTGT  
ACTCTCTTCCACCATATTCAGCGGCGACTTTGCCCTTCCATCACGCTCCGTCACTCCAGATATGTCACA  
GTGGCTCAACTAGATAAGCCTAGTTTATATAGACTATGGAAGAGATGGGAGTTTTTGGGTGGGCTTCAAA  
CCGTGCTTGGAGATGCTCCACGTCAATAAGTGACATCTCCAGATCCGCTGGACGGAAGCCTGTA  
CAGGTGGCCACAATAGGGCAATTTGATTATTTTACCTCTGAATTGCCTGAAGCACTGTACAGGTGGAAC  
CATAGACGTACAAAATCTGGTTTTCTAACAACATTTTTTTTTTCCAAAAATTAGTCCCATATTATCTGGTGT  
CTAGCTATGACGGATAGGAGAGCCATCAGAGAGAGAGTGGATAAGACATCGTTTCTTGACAAGAGGTTAG  
TCGCTAGCTATACAGACCGCTCGGTATGTGGTGGTCGTAACCTGTAGTGAATACATGTTTATAGTATTTCC  
ACACCGCTGGTTTGACAAAACAAGTTTTCAATTTTATCGCAATTTTAACTTCGTCAAAAGAGGAGTCAG  
TCGTGACAAACATGCGGTTTTGCTGTAAAATTAACATCCACGGTAAAAATAGGTTGTCAAATTACGAAAA  
TTGTAATATTTACAGCAAATGAGCAAATCATTTTGATTATGATTAATAAAGTCTGACCCAACTTATTTT  
TGTTTCTTTGTTCTTTTCTGTGATAGGCTGATGAAAATGAGCAATGCCACGTTTTCTGGAAGCCTATTGAA  
ATTGATGACGTATTACAGAAGAGAAAGACAGAAAGGATGCGTTTTTCAATATTGTACATTTTTTATAGAT  
GTTTTTACAGGAAATTAATCAAAGGAGTTTATATTTAAATTGATTCCCCGGTGGGATAGCGGTAAATCAGA  
GGTTCGATTCCCCCTGGTGAAAGGATTGATGGTCCAATGTGTGTTTGCTATACGAAACACACACACACA  
TTCAACTCACTCAGATTACACTTTCAACAGTGTAAGAATGCACATGTTTATGTAGGGAGATATTAAGAC  
TCGTTCTAAATCGACAAATTATAAACCGTTTTTCTTTAATTTGGTGTACCAGCAGATCACATCTTCAATT

ATTTTCATTGTATTTGTTGTGCGATCTTTAGAACAAATTGTAACAATGCTTAAAGCAGTTTGTTCCTTTGA  
ATCTGAAGATATATACTGCTAAAATTATAAAATTCGAGCATAATATTCATAAGCTGGTGGGTTTTTGGGA  
ATTTTCGCACAACACTACTCGGCTATCTGTGCTAGCCGTCCCTAATTTAGCAGTGTAAGACACAGAGGGAA  
GGCAGCTAGTCATCACCACCCACCGCCAACCTCTTGGGCTACTCTTTTACCAACGAATAGTGGGGTTGACC  
GTCACAATATAACGCCCCACGGCTGCGTGGGCGAGTATGTTTGGCGCGACTCGGGCGCGAACCCGCGCC  
CCTCAGATTACGAACCGCACGCCTTACGCGCTAGGCCATGGCAGGCCCAAGCCGAAAGCTAAATAAAAAAC  
TTCACCAACATTATGTATAAGTAATACTGATAGAATATCATGATGATTTACCATTAAAGGTTATATGGCTG  
GAACTTTCATAATGGTTTGATTTTTATCTCATTACTTTATTAGCTTGTTTATATTTTAAATATCTGTTT  
TCATTAGATATAATTTCTACATGTTTAGAATATTTTAGTGGACTIONTATAACTTTGTTTGCAGGTATAGAT  
CCCAATTTTTCTTATTTTATTTTTTGCCATACAGAGTAAGGTTTCCACTTATTTAATTATTGCATTTGTTA  
GCTTGATTAATCAACTTGATTTTTCTATTTACTGTCCTTTAGTCAGAGAGTATGTCGCAGGCAATTGTCCA  
CGTTTTTTAACTTTACATTAATGACGGCCATTTATATAGAATTAGTTTGTAGAAAAGTTCAACTGAATCAGG  
TTACATTATGAGTGCCTTTTGAATAACAAATTTTTTGCTCTCCAGTTATAAAATTAAGTTCTGAATG  
CGATCTCACCATAATACTACTTCTGTATTTAGCCCATCATCTCCTTCAGAGAAATATATTTGTACACA  
TGTCAATCAAACCGTCCCAAAATGGTTAAACAAGTGGGTGCGAATATAACACTGAGAAGGCATATAAAT  
TCAGATCTTGTCTTAGAGTAAATAAATTTTGTTCACAAACCATAGGGAGCGTCGTGCGCTTAGTGCTTGA  
TATGTTGGACCTACTACCCTATCCTCTCTCTCGTTGATTAACTCCTCCAACAGAAAGTAGGGAGGCGG  
AGCACAGTATGACGTAATTTAGACACACCTACTCCTGTGAATTATAACATCTGTGCTTCAGAGTTACACG  
TATTGGAATAACAATTTGTATCAGATATAAAAAACATCGGCCAGTATTTTAAACTCTGTTATTATGATT  
CATTAACTAGTTCTTTTCCATTTTCATGGATGTGATTTGTAGGAAGTAGAAACTCTTATGAAAGGTTTTTA  
ACTGGACTTGTGCAAAATACACGAATTTAGTAATACTTTTTATGTGCTGCCATCTACTGATTTATTAATA  
CACCATTGTGAGTAGATGAAATACGTATGTTTCCACTTTTAATTTGGCTAAATTATGTTAGTGATGTG  
TTCTGCATTAATAATCTTGTTTATTACTAAAAATAAAATATAAATCTCAACTATTTAGTAGCATTATAGT  
GTGTTAAAAAGGTAGATTCAATACGGAATTACTTTGTTAGCTAAGCTAACTTAAATTTATTTTATTTT  
TGGTGTGTTTTTTTTTCTGTTCTTGTGTTTCCACATTATACCAAACTTTTATCACGACTTCGAACCCGTA  
ATTATTCAGATACGAGTAAACATTACCGCAATTATTCGCGAAAGGTGTTTGTGTTTCGCATTGATAAAAT  
TGTTAAAAATATTGAACTAAAAATGCATTAATATACTTAAAGTACATATGGCCCTGCAGGGCCAGGTGGTT  
AAGGCACTCGACTCATAATCTCACGGTTGTGGGTTCGAATCCCCGTACACCAAACATAAATGCATTAAT  
ATACTTAAAGTACATACGGCCCTGCAGAGCCAGGTGGTTAAGGCACTCGACTCATAATCTAAGAGTTGC  
GGGTTTGAATCGCCGTACACCAAACACGCTCTCCCTTTAGCCATGGGGGCGTTATAATGTTTGGTCAA  
TCCCCTATTTCGCCGTTAAAGAGCAGCCCAAGAGTTGGTGGTGGTGGTGATGACTAGTTGCCTTCCCT  
TTAGCATTACACTGCTAAATTAGGGACGGCTAACGCAGAAGTCCCTCTTGTAGCTTTGCGCGAATTTCAA  
AAACAAACAAACAAAGTACATATTTTCTTTTCTCCATATTAATGAATCCAAATTTATACCTTACAGTAACT  
TTACACTTTATTTCTATAAAAAACAGTTTCGTATAAAATGGAAATGGAATATATATTTGATTTACTCT  
CAATGTTTATTTTGGCAGATTTGTTTCAGGCCAAATCGAGAAAGAAAGTTTTGAGATCGCTAAACACCCCT  
TTTCCCCCAGACTTTAGCCCTTAGTAATGTTACTGTGAATCTAGATTAATGTGTACTATTACGAGAGATT  
ATGCGCTGGTCATTATTTAGCCATTAAGAGAATAAGATATATGATGCATCTGTGCGGCAATTGTATATGC  
AAGACTTTCTCCAATATGTCTAACACATTAAACGTATTAGGATATGTTTAGTGGATACTCTAACGATGTAT  
AATAGACGTTTCAATTTGTCTTTAAATAAACTCAAATTATATATATACACACAAGGTGATCCAGAAATAA  
TAGGTCTCTGGAACATCTTTAGAACTAGTTCCCTGACAACATTCTCTGTGTTGAAAATACACTCTTAATA  
CATACGTATTTGGCAATAGATAGATCATGCTAATGAGATTTATTTTATCTTGTAAAATAATTATTTCTAC  
CATTTCTGTACGGTTTGTGTTTGAAGTTAAGCAGCTGTTTGGGCTGCTCTGACTACCATGAGTACCGA  
AACCTGGTTTATAGTGTGTAAAGTCCGCCTGGGCGGAACAAACAACGAAACAGTTATATGTGAGAGT  
ATAATTATTTTTTCTCTATCCTGTACATGCATGCAACAATCCAGTATAGTATAGCGAACCGTATTATCCA  
TGACCTTTTATCACCTGTAAAAGTTACAGGCTTATTTATTGTACGCTAACTAGTACACTGTGAAATCCA  
CCATGAACGATGTGTGTAGCTAAGTTCACTGAAATATTTATTGTACGCTAACTAGTACACTGTGTAATCT  
ACCACGAACGATGTGTGTAGCTAAGTTCACTGAAATATTTATTGTACACTAATTTTCTCGTTTTTGTGT  
CTGTGTCCAGTCAGATTGAAGCCATCATAATTTGTCAATCTGATGATAAGTTAGACGTTTCAAAATATGT  
AATACAAAACCTTAGTGATAATAAAAAAGAACAGGATTATAGAAGACATGACCAACAAATGATGCGTTTCTT

TCGTTATCCCAAATCAATCAGTCAGGGTCATGGCCAAATGTGGTTGTTTTGTGAATGTTTTGAAATTACA  
AGATTGTCGTGGTTATCATTGACAAAATCTTATAAAAAGTTACTAAGCTTGATTATTTAGTAATATAATT  
CAACTGTGAATAAGAGAAAAGGAGGACTATATTCAAAGGTTTTCTTCGTTTTTCATGTGGTGTTAAAGCA  
GTATCTGGTTTAGAGTTGGATACCTTATGGCACATTTTCAGTCTCGTATCTTTATTTTGTGGATGCCTTA  
TGCCACAAATATGGCTCGTTGTTTTTATCTTATCATAGCGTTCTCAATACTTCCACAAATAGTGTTAAA  
TGCCCTTCAAATGTAAATATTTTTGAAGTGGAAGAGATGAGATCTCAGTAATACTGTATAGGACTTTGA  
ACACACTTTTCAGTCCAAAAATGTAACGTAAAACTATAAATTAAAGAGACGTTTAAACGTGAGAAGAATCC  
ATAAAATTCCTGATATGTTTAAAGTAAAGAAAGTTATAAAATATTATTTGATTGGTAATGAGTGTTGCTAG  
TACGTACAGTGTTTAAATAATTTTATTAGATTAACTGATTTAGAAAAAGTTGCTTTCAAATATTAGCATT  
CTATGAATAAAATCTTTTTGGGATGTGAAGTAATATTATGAACTAGCCATTTTCATATCAGTGTTTAAACGGA  
ATAAAAAAGGCCGTTAAACAAGGCCTCTGGTTTTATACACACTGCAGTAATGTGTTGTTCAATGTTAAAGT  
TTTTTCATAAGTTTGAACGATCCTCAACCCGGTTGAAGATCTCACTTGAGTCTCATATGTAATCCACCAT  
TAACATGATGTGTAGCTAAGTTTATTGTCTTTTTATTATACGTTTATTTGTACTCAGAGTAATCCACCAT  
GAACATTATGTAAGCTTGACCTGTTTATTATACACTGATTAGTATACTGTAAAAGCTACCTCGAACATTG  
TGGGTACGATACAAGCATATTGTGAATACTTATCAGTGTTAATGTGAATAGTAGGAATGCTTTCGAACT  
CGGAGTGAAGCCTAAAAACAACAAATAACATATATCGATTTCACTGATGCAAAGCACGTTAGTAAACGTCT  
TCTCTTTCACGAACCGAAAGGTTTTTCAGTATTAAAAAAGGAGAAGAGAGAAAACATTAGGCAACTTTCCT  
TAGCTTAGGCCTTATCTGTCAAAATGTTTGTTACGTTTGAAAGCTCGCATGTTCTGTCCAAGTTCAGAGTA  
ATGTAGTGAATGGAATCTCTTAGTAATGAACAATGAAAGCTTATAATGATTAATTAGTTTGGCGATAATTT  
ACTTAAAAGATTTGTATTAAAAGTATTTTTCTACAACAAGATTATAACCTCAATATTAACAAAATGAAAT  
AGTTATTCGATTGACAGATGTGTATTTTATTTCTCTGAAATTGGGAATTTTTTGACATTTAGTAATATTAA  
TTATGCAGGCTTAAGTCGATTGTAATTATGTTTTTATATATTGTTGGGATATCTGATGAAAGATAACAA  
ACGTGATGAAAATATCTGTACGATTAAAGATGAATCCATGTTATAGACCAATCAACTAGAAAACAAAAT  
TCTGTTGTTGCTTTAAGTTTCACTAAAGTTAATCGAATACTTTAAAGTTTACGGTTTGCAGTTCTTAAGA  
TTAAATAAATTGTTTTGAACTAAAATTCTAAACAAGTGATGTTTTTGTACAATATCAAAAAGTAGTACA  
TATGAGGCTGTAAATGGGTATAAGTAATCCTAAAGTGGAAGTTACATTGAAAGTGACCTATTCATCACAC  
GTTAATCAGCCTGGCATGGACAAGTGGTTGAGGCGTCCGACTCGTAATCCGAGGGTCGCGGGATCGAATC  
CCCGTGGCACTAAACATGCTCGCCCTTTCAGCCGTGGGGCGTTATAATATGACGGTTAATACCACTATT  
CGTTGGAAGAAAGAGTAGCCCAAGAGTTGGCGGTGGGTAGTGATGACTAGTTGCCTTACCTCTAGTCTTAC  
ATTGCTAAATCAGGGACCTCTGGCGCAGATAACCTCGTATAGCTTTCACGAAATTTAAAAACACACA  
CTAATCAGACGATTCTGTTTGTTTTCCAAATATTGTTAGTCTTTTGCCACAGGAATTAGCTTTGCCACAA  
TCTACCTCTCATTATAATTTAATCGATAGTCTGTATTAATTCGCTTTATCGAATTTAGTTTTATATTAA  
TAACCTACTTCACAATATCTATAGACACAAATTATCACAGCTGATATCAGGACCTTCAATCTTCTCTCT  
CTGAAGTGACCTAAGTTGACTTTCACAATAGTCTGGCATCGTACACCAGGGAAAGCTGTTCCATTTCAA  
GTGAATAAACAGTTTTGTAGATTTCACTTGCTATTGGAACATAATATTTAGAATCAACAACAACAAAAAT  
GCAACCTTGAACCCATAATATATCCCATGCTCTTCTCCAAGTTGCCAGGAACTTAAATACAGAAAAACT  
GTCACGTTTTTTATGGGAGTAGGAAGTCTTCCAACCTCACTTTTCAATATAGCCTTTTGAAAGAACCATC  
TACACATTCGACATAGTCGAAATTATTAATCAGGTACGAATGCGCATAATTAATTTAGTCGCTGCATTAT  
GATAACCGAGGTGATAAAATTGATCAGATACGTAATTCATACACTTATGTTTCAGATACGTAATTCATACA  
CTTATGTTTCAGATACGTAATTCATACACTTATGTTTCAGATACGTAATTCATACACATACATTAGATACG  
TAATTCATACACTTACATTAGATACGTGATTATACACGTTACGTTTAGATACGTAATTCATATACTTAC  
GTTGAGATACGTAATTCATACACTTACGTTTCAGATACGTAATTCATACACTTACGTTTCAGATACGTAAT  
CATACACTTACGTATAACTTTCAAAGTGAGACGAAACGAGGCAAAATATTATATACGTAGAAAAATGCAGA  
AAATTATGTTTCAGATATTTAACTGCTAGTGTTGAGGTGTACGAATGGGGAAGATTCATCTACAGAATCTG  
GATGTGGTAGACTTTAAACAAAAGTAACACGGCAACTAATGAAATCAAGTAAAAATTAAGAAATACGGTTG  
CACTTGTTCTATAAGTTAAGCGATACAGTAGTATTTATATCTATTAAGTCTAAATAACATTTGACAGAG  
TTTCCACAGTTTTGCTTCTGTAGTTCAAATATAACCAAGATGAATCCGCACCTTGGAGCTATTAAAGTTAG  
CAGGAATATTAATGATATGTTAATTAGAAAAACAAACGTTTCTAAGGAATATCTCCAGTAAATTTAAAGA  
AGCATATGTTGTCAGACTGAAAACCTACCATAATTTTTGTTTGTGCACATTTGTGTATTTAGGTACATT

ATATACATATATAATTCAATTTGCAAAGGGAATTGTGATTCTTTCGGGACTATTAAGCCATTTTCTTCAC  
ACGAACATAGAATAAATATTTGTCTAATATTTTACATTGAATATAAATTGACAAGAGAAAATAAACCTGGTTC  
ATTAAAAATATTTTAGTTTCTAATGTTTTACTCAAGACGAAAAACCAACACCAACAAAACAATAATTAAA  
TTGATTTTTGTTTTCTTCATGATGCTTTCTTAATACGAACCGAATGACATCAATTGTATACCAACATTGT  
TCCTCCTTGTGTAACTTTGGACGATGACCTTTAATTTGATATTTGATTAAAAACATAACAACACTACGCGT  
ATAGCAATTGTGTCATTACCTTGCACCTCATCTATCATTTAAAAACTACATCTAGGAGGTCATACATCT  
ATCATAATGTTGTAGGTATATCTATTTTTCTATGTAGGTGCATTATACACATTATCTTTGTGTGAATATC  
TGAAGGAAGTACAGCGCATATATCAAAATAATTTACAGATATAAGTAAATTGTATGTATGTGAATTGCT  
TTAGCCACAAGTTTATAGTTTGGATTAATAGCATCACGAGATGAAAATACTGAAGTCAAACATATTTATA  
TTCATTGTAAAGCTTCGGGTTGGTTAACCTGTTCTTCAGCTGTATCTGACTCGCTTGGGATCATATATAG  
CAGAAGACGGCTATACCGTGTAAATATACGAAGGAAGAGCTACAGCCAGAACAATAAGACAGCAGTAGAAA  
CTTACTGTGTACTGTACGAAGGAAGATCTACAGCCAGAACAATAAGACAGCAGCAGAACTTACTATGTA  
CTGTACGAAGGAAGATATATAGCTAGAACAATAAGACAGCAGTAAAAACCAATGTGTACTGTACGAAGG  
AAAAGCTACAGCCAGAACAATAAGACAGTAGTAGAAACCTATTGTGTACTATATGAAGGAAGAGCTATAC  
CCAGAAAAATAAGACAGCAATTCAAACCTATTAATATAATGACAGAAATATATATACCGGAAAGCTTCA  
AACCAATCTACAATGGTTTTAAGTAAACGATTGATAAATAACCATTTCAAAATCATGATACACGCACTGA  
AACGATTGGAAACAATATCGAAACAATGGTACACGCACTGAAATCATTGGAAATTATTTTGAACGATGG  
TACACGCACTAAAAACGATTGGAAATTATTTTGAACGATGGTACACGCAATGAAACCATTTGAAAGGATG  
CGAAATCAAGGATCATGATTTGACACGATAAAACCAAATGATTTAACTTATTTACAGTTGTTTATCGCAT  
AGAECTTACTGTTTGGTTGAACTTTATTCTAATAAGATAAAAATAAAGTTAACAATTTATAGAATGAAATC  
TTTACATAAATTTATTCAAATTTGTTGTATTTCGTAACACGAGTCTGTAGAATTTCTTTGACACAAAATAAA  
CTATAAAATAATGTATTTTCAAGCACTTAACATTTTTTCGCTCAACACGTTGATTTTAGTTTTTTAACTC  
ATTGAGTACGTTTTGCGTAAGTTAATCACAATGCGAAGATATTAGCTATTGTGGTTAACATATCCTTTCT  
CGACCCAACGACTTTTTCAGATTTACGGGCAAACTGCAGAAAAATTGTACTTTAATGGACGGTAACGACA  
TTGATTTCTGGGGAGACGTTTCTTGGCATCTCGCCCTCCTAGCTCGATTCTTCAGCTGACAAGGAACGC  
GAACGATAGAAACATCTCCAGATAAAAGCTTTTTCTGGATAAATGTTGGAGCAAAGTTGTCACCATTTTT  
TTTTTTCTTCTAGCACCCCTTTCAATGCCTTATAGAGATGCTTTGGAAATGGGAGAATAGATAAAGGA  
ACAACGAACAAAATATATGTGTGAGAAACCCGCGCTATGCGCTGTTTTCAAGTTTCCGAACGTAAACAACT  
GAACTTTTTAGCAAAAACGTGCAATGGAAAAATAAACAGAATAATTTTTGTGATACAGAGTGACGTATTA  
CACTTTGGAGAGGGAACGTATTGCCTAATTCTGTCTATGACGTATAACACTTTGGAAAGTGAAGTGTGTC  
TTAATTCGTGTCATTTAGTTGTGTGCGACTTGTAATTCACACCTGTCTTTTTTTTTTTGTAAGAGACGCACAC  
TCAAGCACTTTACATGAATTTACACAAAGTTAAGCATGACGAGGTGGGTTAAGGCGTTGACTTGTAATC  
CGAGGTCGCGGTTTCAATCCCGGCCTGCACCAAAACATGCTCGCCCTTTCAGCCGGGGGGCGTTATAA  
TGATGGTCAATCCCACTATTCTCTGGTAAAAAACTAGCCCAAGAGTTGGCGGTGGGTGGTGTGACTAGC  
TGCCTTCCCCTAGTGTTACACTGCTAAATTAGGGACAGCTAGCGCAGATAGCCCTCGTGTAGCTTTGCG  
CAAAATTAACAAAAAACACCACGAAGTTAAACATTAGATTTTGTAAACATAGTATAGCTTTATTTTAT  
ATACAGGTGACAGAGTTGGGCTTCTGTATAATGTAACGAAGTTTGTTTACGGATCTTACGTTTGGCGAAA  
TTCCTCACGTTGTCTAATTTTTTTTTTAAATTTATTTATCATTGATGTGCTATATAACAATTTTCTTTAA  
TGTATATATATATATATATATATATATATATATATATATATATATATATATATATATATATATATATAT  
ACGTGTTATAACTGCAACTTGTTTTTACAGACTATCTTCTTGAATATTTCTTCAAATGGGACATTAGTAA  
ATAAAGTAGCTTGTTTTGCTTGCTGTTTTTTGTTTTTTTTTAAATTTTCGCACATAGCTACTCGAAGATTA  
TCTGTGCTAGCCGTCCCTAATTTTGCAGTGTAAGACTAGAGGAAGGCAGCTACTCATCACCACCCACCG  
CCAACCTTGGGCTACTCTATTACCAACGAATAGTGGGATTTACTCTCACATTATAACGCTCCGATGGCT  
GAAAGGGCGAGCATGTTTGGCGCGACGGGGATGCGAACCCCGTGCCAGGCCAAATAAAGTAGTAACGAAT  
GAAATAACCTTACCAAAAAGCTTTTTATTATTACTGCGAATGTGAAGGGAAACGAAAAAAAAAACATACAA  
AAGAAACATTTTTTTTTTTTTTACTTTTTTAACAGAGGGCGACAGTGGAACCGAGAGCTCCAGTCCGAAGTGAC  
CCCGGGGAAGCAGTGACGAAGACAACGCAGCTCGACTCCGGTTAAAAAGAAAACGTCAGAGAAATCGAA  
CATCTTTCACACCAGAGCAGATTGAAGCTTTAGAAAAAGGTGAGAAATTAGAAGACAAAAGACAAGTGAG  
AAAAATATTCATACTATGACAGAGTACAGTATTAAACCTAATATATATATACAACTCTGACCACCTCTCCCG

CACACGCAAAACAATAACAAACTATATTGAAATTAGCTGCATCTGTTTGTAATAGCAATAGATTAATAT  
TTATTATTTTCCCTTTATCACTAATGCCGTTTTACGAAACATTTACATTGCTACCTTGCTTTTACGTCTA  
AGTTTACAAATCCAAATCGCTTCACTTTGTTATAGTTTGTAACCTTTCCAACCTATAACTTAAAGCCTTT  
TCAATCTGATCCTGTTTTTTTTATGAATCTTGATGTGTAACCTCAAACCTGCTTAACGCTGGACACTTCTC  
TCGATGGTGTGTGTGTCAGTATACGTCTACCTTGTCACTAAAGCTATTATCATGTGGTGTGTGTACTTC  
CATTCCTGGTAATTCGTTTGCCCTCATGTTGCAAAAGCTGTACCTAAATATTATTGTAATGACGTTTCGTAC  
CTGATGTATCTAACATATTGAAGACTACGCAATCGACTTGCTAAAATATTGAGCATTTTTTATCTATAATT  
GCGTACGTATTAAATTATCAGAGATGGTGCTTTCAGACATCACCTTGTAAGGATATAATTACCAATAATTT  
GTTTTACAGAAATTCGAAAGAACTCATTACCCGGATGTATTTGCTCGTGAACGGTTAGCGGCAAGATAGA  
TTTACCAGAAGCTAGGATACAGGTAAAAGATGTTTTAGTAAATAATATTTAAAAATATATGGGCAGTAAA  
TAACATGAGCTACCTTCAGTAACAACAACGCATTGGTGAGTATGATTTATTTACAATGACGACAAAAGTA  
TCGGTGTGAATGGTTTTATTTATAGTGTGACGAAAGTAGTGGTGTGAATGTTTTATTTACGGTGACGACG  
AAAGTAGTGGTGTGAATGTTTTATTTACAGTGACGACGAAAGTAGTGGTGTGAATGTTTTATTTACAATG  
ACGACAAAAGTATCAGTGCGAATGTTTTATTTACAATGACGACAAAAGTATCGGTGTGAATGGTTTATTT  
TCATTTATAACACAGGCAGTCGTATATAAAGTTTACCTTGGATGATAACACAGGTGACATATCCTAGATT  
TACATGAAGCATACATCATCTGTCTAGAGAGAGAAACAACAACATAGATACGTGCTACACTTGAGCAGTTA  
CAGGGCAACTTAGATTAGATTCTCGTTTCATACAGAGATGTTCTTGCTTTGTTTAGTTATGGTTACATTT  
TATAAATGTAAGTAGTATGTCTGGATACCACCAGAATACATATTACATAGACTGGGAATCCGATCGAAAAGT  
AGCTTTCAATTTCGTCAAATTCCTTTATAAAAAGTGTGAAAAAACCTCAAAGAATAAGGCTTAGAATCA  
CCATATCTTGTGAAGATTTAATCTGAATGAAGATCAGACTTCTTCAACGTGCAGAGATAAAGAAAGAGCT  
ATTCGTTTTTTCATGTATCACTTGTCTAAGTAACTGTAAGTGTGGAAGTCTTTCAGCTCTGTTGCTAAGA  
TACCGCATAACATTCACAGCTGTTTCTGTCCAGGTTTGTTTCTCCAATCGTAGAGCGAAGTGGCGACGA  
GAGGAAAAACTACGGAACCAGAGACGAGCTGCCGAGCAAGCCGCTGTAGCAGCCGTCAACACAACACCGG  
CTCGTCTACCTCTCAACGCCGGCTTTCCCAATGCCCTGTACCCGAGTATCGGACAGCCAATGGCTAGTAT  
GACAGACACTTACAGGTAGATAAAACATCCGGCTGTACTGAACTACCTCTGCACAAAAAGCGTTTCTTTT  
TCAATAACTGATCGTGATAGCTAAATGTTATGCTATTTGTAAGATGGGCTTTGTTTTACCAAATGTTGCG  
AAATTCAGTTAATGTTTTTTATCACGCAAAAAACACAACAGTTTGACCAGTAAAGAACCATTATTTGTCA  
TTAAATCAATAACGCCCTCTACTGGAACCTTAGTGTATGCGCTGGTGAACCACTTTCAGTATGTTTAGTTT  
CCGTGTTATTTTCAGTTCTTCTGTTGATGAAACTGTTTATTATTTTCATAGTTCCATTCTCCGATGTCC  
ACGTACTCTATGTCCAACAACATGGGTCTAGTTCTTGTCTTCAACAGCAAGCGCCATCTTATTCCTGTA  
TGCTACCCCCAGGGAGCGCTAGAAGCTACGATCCTCTGTCACTTGGAAGTTATAGCAGACCATCATGTCC  
TACGGCACAACCATATGTCATGCAACCTGTAAATGGCCAGTTTCATACAGTTAACAACGGTAGTGCCGGA  
TCTACGGGTAAATTAGTTGTTTTTATATCTCTCTGTAAAATTGTGATATGTCAACCTCGTACAAAACCTCA  
CATAACTGAAAAGTCTAGTTTATTGAAATCTGTGATTGTTTTGTTTTAAATTTTCGTGCAAAGCTACAGGA  
GGGCAATCTGCGCTAGCCATCTATAGCTTACCAGTGTAAGACTAGAGGGAAGGCAGCTAGTCATCACCAC  
CCACCGCCAATTCCTGGGCTACTCTTTTACCAACGAATAGTAGGACTGATCGTCACATTATAACGTCCCTC  
ACGGCTAAAGGGCAAGCGTGTTTGGTGTGAGGAGTATTTGAACCCGTGGCCCTCAAATTACGAGTCGCGT  
GCCCTAACTACCTATCCATGCCGAGCAAGAAATTTAAAAAAGTACGTAAATCGTATCATCAACTC  
TTAGAGTCAGTTCTGAAGTTACTTGAATAACAAGGGAAGTCTGTATGTTTAAATGTATCACTCCTTATTTA  
TCGATATTTCAAGCAGCGCCACATGTGCTAACAACCTTTAAAAAAGTCTTAAAGTCAAACATGTTCTCAGTGAC  
TCCTGGCTCAGATATCAGTGAATATCTCACAATAGATATTTATTTATTTTGGATTTCTCTCTACCTG  
TACAAGTGTGGGTAAAGTACAAGGTTTATTTTATCCGATTACAGTTTAGAATAGAATAACAATCGAAAC  
CGTTTCTGAATGAGTTGTGCATGCAGAATAAACATGTTATCTAAAGCAGTGACATTACCAAATATATAC  
CGATACCAGTGCATAGTTTTCGTGATATAAAAAATATAGCGTGTTTAGCTACTGAATTCGAACATTGGTCT  
AAAGTCGGTCTATATGATTTACTATCTAGTTTCTCTCAGTTTTCTCTGCAAGTTTCAATTACATTTTA  
ATTTTCATAGCATATAATTTCCAAGTCATTTGTGAAACGTGTGAAAAGTGGATATAAATCGAAATGTTTG  
TGAGAAAAAGTTATTGACCTATGAAAAGCGAATGATAAACTGGCAAGACTGAAATCCTTTCCTATGCTG  
TGATAATTTATGAAGACCAATAACCAAAAGAAGGGAATGTTATTATATTTAAATAAAATCTTAACTGCT  
TTATTCTTGCAATAATAAATTTGTTTCAGACCTTCTAGTGGAAGGAGAATATGGCGCCACTAAAAATGCCAG

TCTGTCGTTAGCTGCGTTCCTTCATATATGAATACTTCAGGATGACGACATAGCTTCAGGTTGAGATGTT  
TTCCTCGAGAGGTTGAAAAATCTGGTTTCCCAGTCTATAAATAAGACATCCTAACCAGGACAAGAGGA  
TTTACTCATGAGGTTCACTGTTCTCATTCTCCAGTTGACAAATAAGGTGTGATAAACTTTACCCGTGAGG  
TTCAATGATCTCGTTTCACAGTCTACACATAAGGCACCATAATCAAAGGGTGAGAAGCTATCTTCAAGAT  
AGTCAAGAGTTCTCGTTCCTCAACAATAAATAAGATATCTGAGCCATCCCTTGAGAGGGGCAGAATTCT  
TGTTTCTTAGTTTCCAAATCGCTCTATAGCATCTGATATTTTAAAAGAACAATAACAGTTATATTCAAGT  
TTTACAGAAGAAAAGCCCTTCAACCAACTATTTACGGTATTCATTGTGAATACTCATGTCGGTGTATAAA  
ATGTTGTTACTAGTTAATTTTCGTTTCTCACTGATATATATTTTGCATTCTTTGAACTAATATTCGTAAG  
GTGTACACTATTAATATAATTCAATACTACCTCTTTTTAAAGCGAATATTTATTTTTCCCGTTTATTTCC  
AGTAAATTTTAATCTTTTAAAACTGTATTTGTACATATGTTTCTTTGTTCCAATTTAGGTCTGATATCGC  
CAGGGCTCTCTGTTCCAGTACAAGTCCCAGCCCAGACTGGTGAACATAACATGTCCTCTGCCTATTGGCC  
AAGAATACAGTGACGTTGGGAGCGTCAGAAGCACGTATAGATAGGAAAACGAAAACCTAGCTTTTGACGCC  
CTTAACGTATTTAACCATAGAGAAAAGTCTTTATTAAGTGTGGTGAATATAGATATACAGTTTATTAA
