# Supplementary material for: Evolutionary Conservation and Diversification of Five Pax6 Homologs in the Horseshoe Crab Species Cluster
Source: MDPI journal article supplement (doi:10.3390/arthropoda2010007), 2024-03-04
Supplement: s1 [file s1]

>NW\_013665769.1:195031-217360 *Limulus polyphemus* unplaced genomic scaffold,  
*Limulus polyphemus*-2.1.2 Scaffold159, whole genome shotgun sequence  
GGGCTGGCAGGCCAAACCATCAATAACTAACTTTAACGAAGCCATTATTTACAGGTGTCGACGCCCTCGC  
TACCCATTTGAAGAGACTGATAGGCTGACCAGCGGCTACTAACAGCTCCTATAGCTTCTGAAACCTCAGA  
GAAAATGCCCTCATAAAGCTAGGAATAGAATGTTTCATAGGGGTAGGAAGTCTACTTATCATTTTGAATTA  
CAAAATGAAGCCTGCACGTATGTTTCGTTTTTAAATGAATTTGTAGTTGTGTAATTTATATTACAAGATA  
AAAAAGTTTAAAGTGAAATTTGTAATAAATCTTTAACATTATTCATTGATAGAAAATTCAACTTGTGTGTTAA  
TGCACAAAGCGGAATACTATAGAAGTTGTGAGTCCTCAAAAGTATTGTATTTTCATCTACCAATCTGTTTG  
TTTGATTATCTATCGATAAAATAGGCCTTTATAAATGTCAACTAGTTTGATTTTCACTTTAAAAAAGTGAGG  
ATGTTATTTTGTAAATAGGTATGCTTGCTGTTTGTCTAGTTAAGTATTCTTTCTGTTTGGGCCATTGAGC  
AGTTGATAGAGTGTGTGAATATTTTGTAAACAAAAAAGTCTCAACAAAGTCTCACTAATTCGATGACGAGGA  
ACCCACTTTGAGACTAATAATGGCTGGAGACGGCTTAAATGGGTAATGAAGATGACAAAACCTTGTGAA  
ACGTTGTACATTTGCTGTCATGTTAAACTTACATTAAAGTTTTTCTTCATTACCCATTTAAGCCGTCTCC  
AGCCATTAAAGTCTCACTAAACACCATTAACCTTCACTCAAAAATTCTAAGACTAGGTGAATCTGTGTAA  
GATCGTACCAAGCGTCATCACCGGACACGTTTTTGTCTATAATTTTCTGAAAAGTTTACTTAAATAATTCT  
TCAATTACATTTTTTGTGTGTTGTTTACTTCAGGTCACAGTGGAGTAAATCAGCTAGGTGGAGTGTACGTTG  
AACGGACGGCCGTTGCCAGACTCGACCCGTGAGAAGATCGTGGAGCTGGCCACAGTGGTGTAGGCCCTT  
GTGACATTTCCCGCATTCAGGCTCTCAACAGTTTGTGTTTCTAAGATACTGGGACGTTACTACGATCA  
CGGCTCCATCAAACCCCGGACCATTGGTGGCAGTAAGCCACGTGTGGCCACTTCGGCTGTGGTGAATAAAA  
ATAGCCGACTACAAACGAGAGTGTCTTCCGTATTTGCCTGGGAAATTCGAGACCGACTCTTAGCAGACG  
GGGTGTGTAAACAGTGAGAACATTTCCAAGTGTAAAGTACACTCAAAAACAACATGCTAGTTACAACTGTGAA  
TGTAACCGGAGAAGATGAAACCGTCCGCAAGTTCAATCAGACTATTAAATTTGATAGTCAGCAATCTGTGATG  
TCTCTGATTCTGGCATAAAAAAATGTATTTTACCTTTAGTAACATTACTTGAAAAATAAATGTTAGATT  
ACAATTTAACTGAACTAACTGCTAAATGGAAATTTTTTATAAAATAATTTTATGTTATATATATGTAA  
ATATAAAAAAGCATTTGGTTCGTAATTTACTTCTTTATGATAGACTGATTAACATTTTGGAAATGTTTTGTAA  
CATTAAGATCATCATTAGGGAATACAGTAAAGAAATCCCTTTAGTTATATAGATGGCAAAATATTTGAAA  
CTAGTATATGTACACTTGGCCCCCTGATGTGATGTTAAATGTGCTCTTAATGACAACCGTGAAGTTGTGT  
GATCGCTGCGGAGTCTTGGCAGTCTTTGTACGGGGTCAACCCCTACACAAGTTGGAACCTCGATATCAACA  
TATGCTATCATATTTGTGTCTCCGCTCAATTACGTGGCTCAACCTCTCTGGAATCTTTTAACTCACTTGAAGA  
AGTGTGATTTTATTAATAATGATATACAGTTCTGATAAAGGTAAACATGTAATGTATTCTAATTAATATTT  
CTAATTATTTGATTAGGTTTTCAATCATATAACTCGTGTGATTTCAATTAATTTTCGAAATGCATTTATC  
TTTTTCTTCTTATAAGTATTTCAAGTAAGTGACAAAAATGTTTCTGTTTTAAACCAAGACTCATCTAAACG  
TATACCTCTCGTATTTCCGACGGAATTATAACATTAACCTACAGTAAATATGTAGTTTTTGGAAATTTTCTA  
TAAGCTAGCTTGAAGACACCGTACAATGACTTTTACTCCAGAAGCATTGTTTTAGGAATTCGCTCGACCC  
AAACCACGTATAAGACTGTTTGTATTGCATATGATAGGGCAACCCCTGCTGTTTAAAGTTTTGAGGGGTGT  
GAAGTTAGATTGTGTCTTACGTTTTTTTTCTACACATAGGTTTGAAGTCTTGGCGTTGTACGGACAGCTCA  
TGCTGTGTAATGAAACCGGAACTGACCAATGATGACAGTTCATGAAACGTAATGAAATTTAACTGATTTT  
ATAACTCCACATGTGCTTATAGTAATGACGATAATGATGACAGTTCATGAAACGTAATTTAAACTG  
ACAAAACGTGTGTAGCAATTTACACATTTGTATGTAATATGTGCTATAGGATTAACGTGCGAAATGTACTT  
GACACATCTTATTACAGTCTTTTTGTGTCTATATAACTTATAATGTTTGTAGCCGTTTTTGGATAAGT  
TAGGAAATGATTTCTTATTTGTCTCGCAACTTTGTTTTGTTTTGGTAAATGAAATTAATTTAACTCA  
TTAAACATATTTATGATATAGAACTAACTACAGATATCATACAACCTACTAAATGATGTTTGTAAAGCATT  
ACAACCTTCTATTGAAACACTTGTCTTTATTATGTCAACGTATGGATATAGTGAAGCATCTTATTTGTTA  
ATCTTTATGCACTTACCTTCATTTCCATCGACTAAATAATGTGCTACTTTTCATTAAACAGTATTGTGGTT  
TATTAAACTAGCTTAAATACATTTGTTTTAAGATGAGATTATCGTTGCTATACACTGAAACATTTA  
GTCTTATATGAACAGAAATGTGAAAAACAAGAAATAAACATATCTTGATCTTGCAGAAACAATTGGCTAAA  
ATCGCAAAATAATATTTATATAATACATTTTAAATAGTTTGACGGGTTGATAAAAGGGAAGCGAATATAT  
GCATAATAACATTTGCAATCAATCTGAGGGTGACGCACATATATTTTATGACAAACATTTTAGTAGATG  
TATTAAACTAGCTTAAATACATTTGTTTTAAGATGAGATTATCGTTGCTATACACTGAAACATTTA  
AGCTCGTACTTCAATGATGAAATGATAGGTTTATGTACTATTCAAGGTGTGCGAACATGATGTTAAGGAA  
AACAATTATCCGTGAAAACAAATCCATAAATATGATTGCTTTAACAATATGTGAAGTCATACCTTGTGTG  
TGGTATGGGTTGCCGATGACCATGCATATCTGGCTGGGTATAGTTCTTGGGATATCCGTACAAAATCCACA  
CTAGGTTTTAAATTCGTCTCTCTTATATCTAACTTTAAAGATCTGGCATTGGAGGAAAGGCCCTTGTCCGC  
ACTAAAGATAGCAGATGTAGTGTGGTTAATATACAAAATAATAGAAGAACATTTATTTCTTGTTCATACT  
AAATGTGCAATGTGTCCAAGATGTACGAATCATTCTTATAGTGCAAACCTGGGTCAAAACAGTTCTGAG  
CAAAAGCAGCCTTGCTTTGGGAAGAATTTTATGAACACTAAAACCAACATTTTGGAGATCTTCTTTGAGA  
TCGAGTTTTTAAACTTAGGTTAAGTTTTATATGAGATATTGGTCTAGCGAGTTTTCTCTTGATCAAAAACT  
TACTAATTTAGGGTTCAAAATTGAAACATTTTGTCTTATTTCATATTTTACAGGCAAAAGTACCTGAAAAAT  
GCTGGGCTTAAAAATATCGCTATAAATGGGGACGTGGGACGTCACTCCACTATTTTAACTCTGTAGCTCA  
CGAACAGATTGTCCAATGCAAGGTTCCCGTGGTACACGCGGCAGTAAGAGCCACTTTTCGTTTCATTTTCA  
CGTGTTTTACTATATACATCTCGCTTGAAGTTTGAAGTCTGTTTCTGTTGTTATCTATTTTAACTAGATCT  
AAAGAGTCCATCTGATTTCTTATCTATTTAACTAGATATCTAGGGAGTCCATCTGATTTCTTATCTATT  
TAACTAGCTATCTGGGGAGTCCATCTGATTTCTTATCTATTTTAACTAGATATCTAGGGAGTCCATCTG  
ATTTCTTATCTATTTAACTAGATATCTAGGGAGTCCATCTGATTTCTCAACCAAACCTTCATCGACATT  
GTTTCATCCAGATCTTACAAATACTTCTGACACAAGTCAGACAGAATGACGGAACCTTATACACATACA  
TATGTCAGGGTTACTAAATTTACCCATTTGCGTATTGTGATAAAATCAGATTTTAAATATTCTAGGTACT  
GTTATTAGTATTTAAGATATTATCGATCTGTGATTTTATAGGAGTACCCGTTTGACACCGAAAAATAAAT  
GTTTCTTAAATTTATGTTGATTTACTTTCTAACATTTAAAAACAGCATGTTTCTACTAGGGCAATGTGGTTG  
AAATATATTTTAAATGTTTCAGTGACGTTTAGGGAAACCTTTGGTTACAAATAACGTCAAAGCTGTATAC

[illegible]

ACAATATCTAAAAATAATGTGACACTCCGATACTGGTTCACATAAACTTCCGTTTTTTTCATCCTGACAAT  
ATGAAATCTAATAACAGTGTGTATTTCCCATATAAATATGTTTATAAAGACATCAATGTTTACCTGTCT  
AGTTGCTGCCAATCTAGGCTGTTCTTTTCTAAGTATATTTGTCTCAGCTTGTAGAGGTGATATTATCTGC  
AGACAAATATAGTTAAAAACCGCATATGCGACGAAAATATTAAAAATTAATAATAGGTTGAACAATCGCCA  
AGTACTTTTTTATACTTTTATTTCAGAGAATACAAGTATAAAAAAGAACTTGC'TAATTGTTCAACCTATTAT  
TTAACTTTTAGGTGATATTGTCTATCAAGTTAAAAATTGTTATTATTTGGGATAAGATATTAGCTAAAAAC  
GTATTTTTTATGATACTCAACAAGGAGAACAATTTGTTTTGTTTCTTAAATTATATCAGTTAACTTAAGG  
ACTATAAACTTCGAATATAGTACAAGTGTAAGATCTACAAACAGATGTAGCGAGATTGTTCCATTTTGGG  
TTTAAACTTCTGTAAAACTTGTACCATTGGGATACTTATAAGCGTTTGC'TTATTGTCAGTAAAAATTGGCC  
ACGAGGTATGTTCTGCTGAGCGCTAGTTTAAAGTTCTTTTGTCTTTTCACAACTATCATTTCAACACGT  
TATTTTTATTTAAACAAAAGAAATATAAAAAAACCTAAGATATTAACACGTGTTTCATATTTTTTGGACATAT  
TCGATGCTAAATAAATAGTTTTTCTTGACTAAAATCCTCGAATTATTCTCATGTGTTTGTGAGGAGGA  
AAATATTTTTTATACATTTTATCAATTGTGTTTCAACGAAGAAATACAATGCAGGCCCAAAGTACTTTAT  
ACAGTTTCTGATTAAGTAAAGCGCATATATGAGCAAAATATAGTACAAACATAGGTTTTGTAGTTGAACAAA  
AGTTTGGCCTTCTGTGGAAGTTTACGAATATCTAACGTACAACGCTCTGAGAATACGTGTGCAAAATCCAT  
AAATGCTCAGTATACTACATTCTGAGAATACGTGTCTCGAGAGTTTATAGATGTCAAAGATTAAACAAATA  
CTAAGTATATAGGGCGTTGAATATGTTATATTAAACGATTTTGAATATGCAAATCAGCTGCAGTCTATT  
TGATAATATCTTATACTTTTCTTTCTCTAATAATATAACATGTTGAAGCGATTTTTGAGAAAAAATGGCA  
ATGCTACCTAAAAATTGACTGTATGTAACAGCTCTTTCAGACACAAAATATATACACACTAAGATAACAGA  
GATGTGTTTCAGATGGGAGATTTAGAATTTCTGTGACGGGGATATCGCTTGTACTTAATGGTAATGGAAAC  
CAAAGGAATATGAATCATTTGGGGTACCAGAAATCATCAAGAAAAAATCTGTAACAAATCGTACTGCAGCC  
GTGGTAAACTGTCAGTCTTGAATTGTAATCATAACGACGTGTTGAGTGGCAAAAGCCGTAACCTCGTGCC  
CTAGGCAACAGTACGAAAACATAATCGAAAGGATCTCTATCTGAAAGCGAGGCCAACAGGGTATGGGTTAT  
TTTCACCAATATAAGACTTCCAGTAATATTTCTCGTTCAACCATCATATACCTCACTCAACTGGAGAATG  
AATCAGGCATTTCATGCTATTATTTAAGAAGACATACTATTAATATAGCCGGACTTATCGTCTATGGATTT  
ATGTGTGATCTTACTGTTGAAATGGGTGCTAAGAATACGTGTGTCCTCGTACGCTAAAGGATTATGGATCT  
ACAACATGTAGAAGTGGTATGCTTTGGACATGACAGTCTTTTATAATGAAAAC'TAAAAATGTATTCAGGA  
TGGGGATATTTCCGGTACCTTTCTTCTCGTAAACAAACGAATGATGACAAC'TCGAGGTTTTTACTTAATAA  
AAGCGAAAAAGCTATTTACTTAGCATCAAAATTGTGGTATAGCTTTTTCAACCCAACTCTTTCACAAATG  
TGAAGATTATCGAGCCTTTTGGTGCCGCTTGAATGTGATATAATTATCATGTTAATTCTCCCAAACTG  
CGTCTGTCAGATAAAGCATGACCAGACGCGGCGATACAGACAGTAACGACGTGGTGAGGCTCCAAGTTCA  
TTTTAATATAGCGTACTCAGTTTCTGTTTATATTTCCGAGAATTTGTGTTGAAGGCCTATAAATTACGGGT  
GTGAATTACTTTAATACGACGTTCAATAGCATAAATGTAGAAGGTGAGTCGCACATTGAGTAGCTGCTAAG  
CTGAAGCTCAGGATCAAGCTTTGGTGCCGCTTGAATGTGATATAAATTATCATGTTAATTCTCCCAAACTG  
TCTAAAAGCGCTTCAATACAGAACATTGATATAGTATATATGATGTTTATCCATCTATTATATGAATATT  
TAAAGTTGAATTACTCTTGGTACCGATGGAATATAATGCCCCCCCCCAAAAAAATCGACAGTTGTTTT  
CTGCATGGCCCTCCTATACGTTTGGTCAAAGTAGATAATGGATCTAACGATGCGGCGTGTACTACAAAAC  
GGGAGATCAAAATAAAGCGAGCACACCTTTTGGTTTTCTTTTCTTAGCCTCTAGTGCCAACTGATTGTC  
TAGCAAGCTACCATGTACATACGGTTTTCCGCTATAGAAGTCAGTGCCAAGTCGTCCATCCACAGTAGTA  
TGGGATTCAACTTAGGCCTGTGCAAAAGCTGTTAATGCATCTTCTTGTTGCAAGGAACACTCTGGGTTTTG  
TTCTTAAACGCACATGTCTGGAACCTGGCGAAGTTAGAAACACAATAGTTGAGACCTCTTTTTTTTTTAA  
CCATGATGACGAGTCAAGCTGACGAGGTTGAGGATGAAGGGGAGGGGTCGCGTGCGAGTTTAGGT  
AGCCATAATTTTCATGAATAGACCGCTCAAACGTTTTGTGTGTGTGTGTGTTTGATCAGTGAAGTTTGTAA  
GAAC'TTACACCGCTCAGCCTTTGTATGTTTGGTCTCGTTGTCTCCTCGTAGCCAGCAACGACAGAATAAT  
CTTCTTTCCGAAGGAGTCTGTCCAGCACTCTAATCCTCTTCTTACCCTGATCGTAAGCAGAATCACAAACA  
AAGACATAAGCGTTTTCTCTTAAGGTATTCTTGGGCTGAAATACTGATCTCCATAATTTTCTGATGAT  
TTCCGATCATCTGTATCAGCCTCCCTATTTTTCGTTTCTGATTGTATAAGATTTATAAAAAAATACTTA  
CCCAAAAAATATTTTAAAAACCAACAGGAGATCATCGTTGGTATCATACACGCCTGCTAGAAGTTTATTTA  
CCATTTATAACCAAACTGTTTGCAAAATTACGAAATTTACAGATTTTATACAACGCTATATTTTAAGATA  
ACTTTTCCAAAGAACTCACTCCCACTTAAGATATTTTACAAAAGTCTTTGCCGGAAGAACCGCTTTA  
ATCCTGTTTTGCTTATTGATTGTCTCCATACAAAACGTGCAAAATAGGTTTGTAAAGTTTTTTCATGTTTCG  
ATACAAGGCTGTGAAAAGCAAATACAATTATACAAAAGCACACAATGTTGACCATTTTAAACAGCTGTATT  
GATAATCACCTACAGTAAAGCATTTTCGATGTTTTCAAATAGTCACACATTTCAAGTTTCAGTGAAGATTAT  
AGAAAAGTGTAAATAAAAAACAGACTAAGTGGAATAAACAACAAACCAACACTACAAAACATGAGAATG  
TATTGCAGAACAGTCTCCGGATGAGGGTTTAAACGACAAAGTACAATAGACCTGTTTGGCGTTGATTTAAT  
GCATGCCGAATTTACTCGCGTCTTTGTACTACAACCTGTTTACAACGAGCTTAAAAACTCCTTGAAACTG  
GTTTGTTTTACTCAGTTACAAACATAACATTAATAGGCTATACTATAGGAGAGGTCGTTTACAAAAAT  
CCAAACAAACAAAGAGGTATATTTCCATAAAGACAGATAAGACGAAGAAAAACATGCCGATTTTATGAATCTA  
ACTTTCAAATGGAGAGCAACTTTCGAAACGTCGTACTCTACATTTGTAGGTTTCTACAACAGGCAGTTGC  
TGTTTCATTTGAAACTTAGATTTCATTATGAATACTCTGCCTAAACAACCTATCAAAAATGACGATTTATAT  
TTCAACGAATTTTTTGATCGATAGAACTTATCGAATACCTTCTTATGATAAAAAATCCATCACTGCCTGG  
CTCAGCATTTGCAAGTGCTTTAGGGAGCTCGACTCTGTTTGAAGTTCGAATCGCCGTCACCAACATGCTCGCC  
CTTTTCAGCCGTGGGGTCTGTTACAATGTGGCGGTCAATCCCACTATTCTGTTGATAAAAGAGTAGCCCAAGA  
GTTGGCGGTGGGTGGGGATGACTAGTTGCCTTCCCTCTAGTCTTTCACTGCTAAAGTAGGGACGGCTAGC  
GTAGATAGCCCTCGTGTAGCTTTGCGCGAAATTCAAAAACAAACCAACCATCACTGCCCTCCAACTCACCT  
TCTCTTCTTATCATCATTTATTTTGTATAAATCCATCATTATTTTCAAGTCTTGAAAAATATAAACTTTTAT  
AACCTTTTACGATGGATTTAGAGCTGTGTATTACTATCCTTATTGATAAAAAATGCTTTTATTTGCTAAC  
ATTAAGTTCTATTTAAACGAAATGGACAGATATAAAGTTGTGATACAGAAGTGGAAAAATAAAATTCAGA  
AAATCAACAGCCCAGTAAATTTTTATTATGAGAACTAACATAAGGAAACCAAGTAAGCTGATTCTCTCA  
GTGTTTCATTTGTGATGAAAGATTCTGTGGATATTGCACTCGATAAATAAGGGCGTGATTGTGCCGAACAA

CGGGTGGATATTACGTTTCGTTGTGTTGATGATAGGTGGGGACTGCAAGAGTATGTTAAAGGATATCACA  
GTACCAATCGTTTTATTTTTAAACGGAAAAGATGTATATTGCATTTTCTTTTCGTCGTTTGTGGTTAAA  
AACGTTTAAATGTTTGTACTCCCTGAGTGAATTCACTTTTCTTGTATCTCTTTGTCTGTTTGTCTTAATTA  
TTTTGGAAAGACTTATACTTTTAGAGTCAAAACACACAAGTACGTGGACCACATCATTTTTTATGCCACT  
CTCTGGTATGAAATAATTTGAGTGCATTTGACGTTTCTAGATATAAATAATTTTTATGGTTAAAGAATAAT  
ACAATATTTGAACAATGTTTGAAGTAGTAACAACCTCCTCTTGATCGCGAGTATAAACACATTTAACACAGC  
TATAAGCTTGGAGATTAAGAACAGATAATACAAAGAGTTGCTGGAGAGGCGTCTTCAGGGCGCCATCTAT  
AGAAGAATATACTAGTTATGTTGTCTATTATAGTAACACTAGTTGAGACTGTTACTCGGCTGTAGAGGA  
TTATGGGATTTGTGTTCAACGAGTTTATTATCAGATGAAATTCTGACCTATTTCTTTAGAATAGAAATGG  
CATCAAAGACAAGCTGGCGCCGCTGTCCAGTTGAAAAGCCGTTTTTCGAAAGATGACACCTCAAATAAA  
GCTTCGCACGTGATTATTCTGATAACGACTCCCAACCCTCAAGGACGACCATACCTAATATGTATTAAAG  
TTATTTAATAACGATTTTCTTTGATAATGCCTTAATTACCTTTTCTATATTCATTGAAATATTTGTCAGA  
CCTAATCATTTGCATTGCTAGTTTTTGTAAAAAAAACAACAACAACAGGATTTTCTTGTAAATACGA  
AAGCTATGGTATGAGGTTTATTAGGTCATGCTGTTGATTAAGTTAATTACCCGTCGTCCCTCATCTAACG  
GCTGTAATCTAGAAGTTTGCATCTGTATGTTACGCGTGCATTTTACCGTACTGGTACGGAGGCTTTTACA  
GTTTGAATCTGTATGTTACACGCGCATTTTACCGTACTGATATGGTGGCGTTTACAGTTTCGAACCTGTAT  
ATTACGCATGAATTTTACCGTACTGATATGGTGGCGTTTACAGTTTCGAACCTGTATATTACGCATGAATT  
TCACCTTCTGATGAGGTTTATTAGGTCATGCTGTTGATTAAGTTAATTACCGTGAATTTTACGATGATA  
TGGTGGAGTCCATTGTTTTAATCTGTATGTTAGGCCTGCATTTTACCGCACTGGTATGGTGAAGTTCACA  
GGACAGCTGAAGACATAAATGGTACTTAGTAAAGGATTATGTTGAGAAGTGCAGTCTGGTTCTCAACATC  
AAAGGAAAAAGTATGTTGATTTTTAATGTTAAGTAGATCGCCTACATGATATGAAGTTTCGTTTTCGTTTTG  
GACACCTTTTGAAGCTGTTTTTCTGTAATGTTGATTAAGTTAATCCTAACTGAATTTCTGTTATGAGTAT  
ATTCATAATTTTTTAAAAATACTATAAGACAAATGTAATAACATGTCTGTCCAACGTGTTTTATTATTTGT  
TCTCAACAATCGAAGACATAAAGCAAAAGAAAAACAAAATAACAACATTTGGATTAAATTTATATAATGCT  
TATTTATCTATCTGTATATAATAGTACTGTCTGTTGTATGTCCATGTAACACTCTTCTCAGGGTGTGGATC  
TGGGTTTCATGCGGAGAAATAAGCAAAATCTCAGTTTCAAATTTTTTTTTCTGCAGTTTTTATGGGCGCTT  
TTTTTATGGGCGTTTTTAAACAATTTCTTCCACTACTTCGCCCCCTGTAGATGGATCTTCATCAAATTTGGT  
ATGGGGAGTTTGGGTTTACGGGGGAGATACATAAAATTTTTTTCAGTTTTTGCCTTTTGCATTTTTATAGGCG  
TTTTTGGCGTTTTTACCCTACTTTCGCCCCCTGTTGATGGATCTTCACCAAATTTGGCATGAAGGTTTGT  
TGGGTTTCATGCGGAGAAATAAGCAAAATCTCAGTTTCAAATTTTTTTTTCTGCAGTTTTTATGGGCGCTT  
TTGCATTTTTCTACAATTACATATAAGGGAAGCAGCTTTTTCATGTGCTAAGATAACCTTTAATTAATCATG  
AATTTACATAACTTCCGTTTACGGGGACTGGTACTTTCAGCTAGTATAAGATTAGTTTTTAGATTACGTATTT  
AAACACTTTTCGAAACATTTTGAANNNNNNNNNNNTAACTGTACAATTTCTCTGTGCACGTATTCGGCAA  
TAACATTACCAACCAAGTAAACACATTAACAGATTTAAACAATATATGTAATAACTTTTCAAAAGTGTTTA  
TTAGAAAGCACTTTTCAAGAGATCAAGTTGTTAATTGAAAACAAAAAGAAATTATAGTACATTCCACGTAA  
CCGAGTCCCTGAAATGATTCTGATTTATTGTTTAAATATCTATTTATATCAGTTGATATTTGAAAGAGAG  
AAACAAAACCTGTAGTGAAGAAGTGTAAATAAAGATACAGCCCTTAAGGAACCTTTATTTCTAGTGGTGT  
GCCACCTTTGTCAAAGCTGTATATCTGGACTTGTGTTAGAGACTTAGCAATCCAGTCTTATCTACGACAA  
TTTTACTGTTCTATTTATACACGTATTAAGACCTCCTACAGTCTTTTTTTTTTCTGCTTGATAGCCTCTG  
GTCGCTTATTATTCGGAAGGATATTCTCTCAAAAGGGCGGCACCTTTAGAGACGCACAAGGGGTAAATTTCT  
TTGCAGTGATTAGGACTAAGCACCAGGGACTACAGATTCTTAATAGAATACCTCCTTCTCCTTGTTTACA  
GCAATTATAGGAGGACGATACGAACCTTCAACACAGACCTGTCTGTTTGAGGGGTATGTTAGTACGACAA  
GGATATTGAAGAGCCAGTCAATAATTGTGCGATATCTCGCACGTACAAATGACATGAGCACTCCATTTGGT  
TATAATTAAGAAAGCTTGTCTGATTTTGGCTTAAGGCTACAGCTTTTCCCCACTACCAGTCTGGCCTCT  
TTGAGGATTTTACTAATCGAAAGCACATCAGTGTCTATCTGCGTTTGGTATTTGTGCGTTTGTGCGCGTGG  
CCTTTCAGACCTTCTGTACAGTAACAATAAACCACTTTCTAGTTTCGCAGCCAAATTTCAACAGCTA  
TTCAACACTACCATCTTTTTGTCTTTGAGTCAAAGACAAGCCGTGTTCTGTTTTTATAATCATAATTTGGC  
CAGATAGAACTAAAAAATGAAGGAATAAGGTGTTTTTTTTTCTGTTTTTGTCAACAATTAATTGATATG  
GAACGCTTTCCCGAAAGATAAAGCTTTTCGTATATACAAAAGGCTCTTTAGATTTACCAAATACGAATACAC  
ACATTCTTTGTCAAAGCGAAACAAAAATTTGATATTAAGAAAATATGGAATATATTTATATATGCT  
TTTTCTTAGTTTTCTCAAATACAAAATAAGATCGAAGGTAGTTTCGACTGTTGCTGCTTTAACCAACTGT  
AATTTATTCAGTTCTAATCGATTCTCAACGTTTCAAGATTTTCAATGTAATATTTCTTTATAAAGAGATAAT  
TTCTTGATTAAAGAAACATTTTTTATAAATATCAGTTCTACTGTCTCAGTAGCCTAACCTAATTCCTTT  
TTTACCTTGAATATAGATTCCATAGATGCAACTTCTGACGGAACTCAGAAAACAATTCCTCTGCAGATGA  
GGACTCACAGCTGCGCATGCGTTTAAAAAGAAAACTCCAAAGAAATCGGACATCTTTTACAAACGAGCAA  
ATAGAAGCTTTAGAAAAAGGTAAATATTTCAGACAAGCTGTTTCAACTGTGAAAAAATAAAAAAGTTTTAA  
ATGCAGGGAATTTCTATTGGTCTAAAAGAAAAAGAGCTAAAAATATTGTTCTTCATTCAATTCGAGCTAT  
TGAAAAATAGTATTTTTCTAATGTGCATAATTTTCATCTAATTTCTAGAATTCGAAAGAACACATTATCCAGA  
TGTTTTTTGCAAGAGAAAAGATTAGCTGAAAAGATTACTCTTCTGAGCTCGTATTTCAGGTATGTCTAAAA  
CAACAACAAAAAAGCGTTATTTCACAAAACCTCTCACTGTGCTGATGATGGTGTACCGGAACCTAGTAA  
GTGTAATAATTAATAAAGCTATATGTTTTCATTGTGTCAAGAAAAACGTCGATTGTTTTCTTCTATTTA  
TCGACATATTTGTGATTTTATGATGAATCAACTGGTATGAAATGTACAATTAAAAAAACTGTTTTTAA  
ATCATCTGTTTGTATTATTAATACTTTTGTGATAAATTAATTTAAGCATATAGATCAGAGTTAAAAACAA  
TAACCAGAACATTAATGAAGCCAAATCCTGTTTAAACAAATTTATCGGAAGTGCCTAATATCGTAAATCAA  
TACGAACATAAATCAAAATATATAATGATTAGATAACACAGAAATATCATTTGGATACCCACGCTGTC  
ATCGATATTTTGGCCGTAAATCCCAATAATATTTTCAGCATATTTGTCCAGCGCTGGAAGTTAGGTTAGT  
CCTAAGTCTATATACTAAATTAACAATGCAAAAACATTTCTCCTAAAGAAAAAGTTAAATGAAAAATAAAT  
TTAAGATTATACAAAAATGATGGGTGCTATATTAACACTTGAACAAATGCTGTCAATGAAACTGACTTT  
AAAGAAAGAAATGGAATTTAAGTATACTTACAAGACACATAAAAACTAGCTTAGGAAGTTTAGTTAGTTC  
TATACCAACATACCTGAGTCAACAATGTTAAATTTATAGTTTATAGACCAGATTCAAGGTAAAAATACAGTA

AACAAATGAAGTCGAATAAGAAAAATTCAATTGTTTCTTAAAATATGTTATCAGAAAGAGAGGAGATCAGA  
TAACTTCTGAGACCTCACTTTTGACAGGATTATATATATATCATTTCCTTGTTAATTACTCAGATAGTCAAG  
AAATTAACCTCAGCACAAATGTTTCACATTTGCCTCATTTATTTAGATGTAGATTTTGAGTAGTGTGATAT  
ATTTGTTCTTCTGAATGACACCTCATGCACACAATGAGATAAGTGAACAAGAATTAAGAATCCTTTATGG  
TTCAGATATATCTGAAATGCTATTTATTACCCACCTCTGATTTTGAGCCACAATAGACAAATTA AAAAGGA  
ATCATCTGCAGTAACATCTTTCTATTACTGAACATTTTCCTAACTTCCGTAGTACTTTATTAATAAATGTT  
CATGAAGTCCCCTGGTAAACGTCCCATATGAATCTATATATCTACATTGTAAC'TTCTGAAAGTGAAAAATTG  
AAGATTTGGACTAATTACATTTATTCTCAACATTTCGAATTAACACGTCTATTTAGGTATGGTTTCCAA  
CCGTCGAGCAAAATGGCGGCGAGAAGAGAAGCTTCGTAACCAAAGACGAGTGGTTGAACAACCAACTGGC  
ACAACTGTACTAGCACCACCTAACGGACGACTTCCAATTAATGGAACCTTTTATAACTCTATGTATCCAT  
CATTAGGACAACCCGATGGGTGGAATGGGCGATTCTTACAGGTTAGTTGCATTAAATCGACGTTTAAAGTT  
CTTTCATGACAAATCAACAACAAGCATGTTGGATGAGAGCATTTATTATTGTGTGTGTGTGTGTGTGTCTTA  
TAGCAAAGTCACGTCGGGCTATGTGCTGTGTCCACCGAGGGGAATCGAACCCCTGATGTTAGCGTTGTAG  
ATCAGTTAGCAATTACTTCCATCGGGGAACATTTATTATTGTAAAATTTGGTGTAAACGTAGAGTA  
TTTCAGATGGAATTAGGTTTGTAGTGGTCTAAATACAGGGGGGCATTAGCCAAAGGGAGAAGTGCATTTG  
TTTTTCAGACTTAAACTTTGTAGTAAATTGTACAAAGAGCTAATTGTTGAGAGCTCTTTTATATTTCTT  
TATATTAATTATGTAATGCATTTTAACTATTGATGTTATCAGATATTATTTCAATGGTCTTTAAAAAATG  
TCTGTGTATTAATAAAGTACGACATTTTAGTCTCACAGTTACGTTAGACATGATTAATATATTTGATT  
GATGTATTAATTTGTAGAATAATAGTAATAATTTGTTGCAATTTTAAACATTTCTAAGTCATTTAGCTCA  
TCATTCTAGGGAAATATTATTTGGTATTATTGATAACTAGGTTATGGGAAC TAGTATACCATTTTGTGT  
TTTAATGAATTTAATATGAATTCGACAATGAATTTGTGTTTATATGTGTGTTGTGGTTTAATAGCAATAT  
TTCTGTTGCAATTACTTTCACAGGTTTCTATCTTATTGATAGATCGATTATAAAACCTAGAAATAATAGTT  
TAATTTTGATAACTTAAACTCCCTATATAGGTCTTAAGTATATAAGAAACAGGTTGTTCCGCTGTCTGT  
TTCGTTCAATTGATCACGTCATACAAGTTTACAAGTAATAGGTCACAAACAACCTCCTATTTTAGACTTT  
TACCACCAGTTAACAGACTACGTTTCAATCTGATATACTTACAGTATGCCACCATCATCCAGCATGACGT  
CAAATCATTGTCTGCAGCAACGCGATCCTACCTCTTATACCTACATGTTTCACGATCCACTTAGTCTGGG  
ATCTTATTCACGATCATCTTGTACACCCAGTCAGTCAATTAATGGACACCCGTCTTACTCTGTTAATGGA  
GGAAATGCGCATGGGTGCAGGTGAGTAGAAAAATACTGTAATACAGAGATGTAAACATCAAAAAATGTTTGG  
GTTATACAAGAATAAACACAACGTTAGATACCAGAGGAAGTACGCATTGTACAGGTGGTTAGAAAAATAAT  
GTAATACAGACGCTCACATAAATTTGAATTTTTCATACTTATGAAAATATAGTGTAAACTTGGGTAGTAT  
GGTTAATACTAACTAAATAAATAAAGTACCAAAAATTAGATCATATGAAAATAAGAGATAATCACACTG  
CTGAGTGCCTAGAGAATAGTGTTTAGACAAGAGTACCAATATATATATAGCTTTATTAGAGTAGTATTGA  
TATATTTTACATATATATGTAGTAGTTTTTAACACGCACTTCCTTATTATTCCAGGTGTCAATTTCTCCAG  
GTGTGACCGTTCTCTGCAGGTACCAAGCCAAGGCCCTGATCTTTCAATGGCTACCAATTACTGGCATCG  
TATTCAGTGA CCTCAAACTTGTAGAAACGGCTACTATTGTTAATTGTACCTTTTAAATGCTATAATAAAG  
CTTTGATTAAGTCTGACTACAGAAAAGAACGTTTTTGAACAGTGGAATAAGGCCTTGAATAAATATGGTT  
ACTGAGCATTTCTTAGCAGTGAAAAACCTTGATTAAGTCTCATTAGTGAGAACGCATTCTTTAACAATGG  
AAAACGACTTTGATTAAATCTGGTAACTGAGAAAGTATTCTTGACAGTGAAAAAAGCCTTGATTAA  
ATCTGGTTACTGAAAAAGCATTCTTTAACACTGGAATAATAAAGCCTTGATTAGTCTGGTTATCGACAA  
AGCAATATTTAACAGTGAAATAGAAGCTTACCAAAAAAGCGTTTTT CAGAATTAAAGCCTGCAAAGTAAA  
TCGGTTCATACAGAATATAAATAATTACTTCGTTGTGTTTACAGAATTGTACCAATAGCATATGACAT
