# Supplementary material for: Evolutionary Conservation and Diversification of Five Pax6 Homologs in the Horseshoe Crab Species Cluster
Source: MDPI journal article supplement (doi:10.3390/arthropoda2010007), 2024-03-04
Supplement: s1 [file s1]

>CM024343.1:19625403-19652002 Tachypleus gigas isolate IMCB\_SINCHF\_001  
chromosome 6, whole genome shotgun sequence

ACTTGAAGAGACTGATCGGCTGACCAGCAGCTACTAACAGCTCCTGTAGCTTTTGAAAACCTCAGAGAAAA  
**ATGCCTCATAAAG**GTAGGAATGAAATGACTCTTAGGGGTAGGAAATCTATATATCATTGTATTACAAG  
AAAAGAAGCATTACGTATGTTTTAGTTTAAATGAACCTTTTAGTTGCGTAAAATATAAGTTAACACAAG  
CTGTATTTTTTACTCTTTAAAGTTACGTGAAATTGTAAATATTTAGTATTATTCAGTAATAGAAATCAA  
TTTGTGTGTTAATGCAGAAAAACAGAATGGTAAAGAAGTTTCGAATACTGAAAAGTATTTTCATCTATCAATC  
TGTTTGTGTGCTATCTTATCATTAAATATATCCTTACAAGTGTTAAACAGTAATGTTTTTCATTAGTTTC  
ATTTCTGTATTTAAATACTATGAATGTTATTTTGCATAGGTATGTTTGTCTGTTTGTGTAAGTTTAGTATCC  
TTTCTGTTTGTGTCACTGAGCAGATGACAAAGTGTTAATGCTTTATAATAAACAACTTTAAGAAAAATG  
TAATAAACACCAATATCACTGACATCAGGAAAGGTAGCTGTGAGATCGTACCAAGAATCATCAGTGAACA  
CGTTATTTACTCACACTTTTCTGAAGAGTTTATTTAGTAATTCCTAATTTTCATTTGTTGTTGTTCACTT  
CAG**ETCATAGTGGAGTGAATCAACTGGGTGGAGTGACGTGAACGGACGGCCGTTGCCAGACTCGACCCG**  
**TCAGAAGATCGTGGAGTTGGCCACAGTGGTGCTAGGCCTTGTGACATCTCCCGCATACTGCAGGTCTCT**  
**AACGGTTGTGTTTCCAAGATATTGGGACGATACTACGAGACCGGTTCCATCAAACCCCGAACCATTTGGTG**  
**GCAGTAAGCCACGTGTAGCTACTTCAACAGTGGTGAATAAAATAGCCGACTACAAACGAGAGTGTCTCTC**  
**AGTCTTTGCGCTGGGAAATTCGAGACCGACTCTTGGCAGACGGAGTGTGTAACAGTGAGAACGTTCCAAGC**  
GTAAGTACACCCCAAAATAGTGTCAACTGTGAACGTAACGGAGAAGATTAGAAACACATCGAATTCATTC  
AAACTGTTAAGTTTGATATTAAGCACTTGCTAGTCTCTAATTCAAGCATAAAAAATATCTATTTAGACCT  
TTGCAACATTACATTACATGAAAAATAACCATTTACACCTTTGTAACATTAGATTATATGAAAAATAACT  
ATTTACACCTTTGTAACATTACATGAAAAATAACTATTTACACCTATGTAACATTACATGAAATATAACT  
ATTTACACCTTTGTAACATTACATTATATGAAAATTAACCATTTACACCTTTGTAACATTACATTATATG  
AAAAATAACTATTTACACCTTTGTAACATTACATTATATGAAAAATAACCATTTACACCTTTGTAACATT  
ATTTTATATGAAAAATACTATTTACACCTTTGCAACATTACATTACATGAAAAATACTATTTACACCT  
TTGTAACATTACATTATATGAAAATTAACCATTTACACCTTTGTAACATTACATTATATGAAAAATAACT  
ATTTACACCTTTGTAACATTACATTATATGGAATATACTATTTACACCTTTGTAACATCATATGAAAA  
TAAGTGTAAATTAATAATAAATACTAAGTATAATTTGGAAGTATTAACAGTTTTAAATATCTGAGGT  
TATATATTATACGAGTGTAAATAACGAGCATAGTGTGAACCTTTCTTTTGGCTAAGGTCGTTATGATAGA  
TTGGTTAATCTTCTGAAATATTTTATAAACTATTGTAACGTAGCTTTTAGTGACGTTTGTTCACAAAA  
TTGTTAAACAAATGAAGATACCGCATTAAGAACATCATTAGGGGAAGTGAAAAAACATTTCTTTAGTTA  
CATTGATAGCGAAGTATTTGACACTAGTATATATCACAGTTATCCTCTGATGTGATATTAAATGTGCTTC  
TAACGACAACCGTAAAGTTGGAACCTCAATGTCAAACCATGTGATGACATGGCGTCTTCGTTACGGCACGT  
GGCTCAACTCCCTGTAAATGCGCTCCAGTGGCCAGCGGGATGTCTGCGGACTTACAACGCTAAAAACGC  
GGGTTTTGATACCCGTGTTGGGCAGATCACAGATAGCCATTGTGTAGTTTTGTGCTTAATTCAAACAA  
CAACAACAACCTCTGGAATTTTGAATCCTTCTAGAAGTTTAAATTTATTAACAACGATACACAGTTCTGG  
TAGATGTGCAAAGGTCATATCGATTAGGTTTTTACATCTATAGCTCGATCATATATCTCTTGCTGATTTT  
AATTGAATATGAAAAATGCAATTATCTTTTTCTTCTCCTCGCAAAAGTGACGCAAATGTTTCATTTAAA  
ACCAAGTCTTATCTACAAGCTCATTACTCGTATTCCAAAGGAATTATAACACAATCACCCTAGTAAATAT  
TCAGTTTTGGGATTTTCTATAAGGTAGTTTAAAAACACTGTACAACGACTGTTACTCCGAAATCCTTGAA  
TTAGGAATTCGACCGACCCACACCACATATAAAGTTTTTGATTGCATAAGACAGGACAACTTTTCTGTC  
TAAGGTGTCAAGTTAAATTGTGGTTTACATCTTTTTTACAGGTATTTTTTTTTTAAAGTTTGCCGCTACA  
TCGATAGCATGTCTGTCAACCGAAACGCCATATCCAGGGATTTGCACATGTATGACTGACAACTATGAAA  
CCAAACAATAAAACCATGCGCTGATAGTAGTTTACAGTTTCAGTGAAAACAAATTATAATTTACAGA  
CCTGTGTAGTATTATACACATTTTTTATGTAACATTTGCTACTGTATTAGCTGTCAAGGTGCACTCGACA  
CATCTTATTACACTTTTTTGGTGTCTGTATAAATTATGATGTTTGTATAGTCGTTTTAGGATAAGTTATGAT  
ATGTACACTGATGTGCTTGCAGCATTCAAATTTTAGTAAATGAACCTAAATCTATATCGACTTTAAAGC  
AATCAAAACATATTATTATATAAGACTGCAACGACTAGATGATGTCTCTAAGACATTACAAATCAGTGGT  
AAATGTTTACATAAACGATGTAACCTCTTCTACTGAAATGCTTGTCTTGTATATCAAGGTATGAATATA  
CTGAAACATCTTAATTGCTCATCTTTATGCAGTTACTTCTATTTCTATGAGTTACATAATCAATTTCTTT

CATTAAACAGTGATCTAGTTTGATTAAATAATGTTCAACTATCAATGTGTTTTTTTTTAACTACGCAATAA  
TTTGACGATACGTGGTTTGAGTCTCATATGAGCATAAGTGTGAAAACAAGAAATAAACTTATCTTGATT  
TTACAGAAAATTGGTAAATAATATGATTATGATGCCTTTTAAATAGCTTAACGGGTTTATTAAATGAAA  
TCCATGTCATGCGTTAAACAACGGCATACTGCTTAATAACTTTTGGAATCGATTTGGGGAATAGCTTAA  
TATCACTTTTGTTTAACAACGAGGGTTAATGTTGGCATACTGTCGAATACTTAAGCTCATATTTCAATGA  
TTAAATGGTAGGTTTACTGACATCTTAATGTTATATCAGAGGTATACTACATAGATCACAAATCGCGAAC  
ATATTGTTAAGGAAAAACAATTACTCGTAAAAAAAAGAAATCCAGGAATATGCCGGGGGAGGATTGCTTTA  
ATATAGCTTTATTTCGAGTTCTAAATGTAAGGAAAGTTTTTATATAAAGTAGTGATCTAACGGATGTTTTT  
CGTGTTTCATAAACTTACTAGTTTAGAATTGAAAATACAAACATTTTCGCTCTGTTTACATTTTATTAACAT  
AAGTACCTGGACATAAAATATCACTATAAATGGGAACGTGGGACGTATGCCTACTGTTTCAATCTGCAC  
CACACGAACCGTTTGTCCGTCCCAATGTTACCGTGTTTCACGCGGCATAAAGAGCCGTTTTTCGTTTCACG  
TCGGTTTTCAGGTGTTTCACTCAGTTGAGCTCTAGTTCGATTAGGTTCGGTTTTCATGTGGTTTACTCACTT  
AAGCTCTAGTTCATTTACGTCGGTTTTATGTGTTTTACTCAGTTGAGCTCCAGTTCATTTACGTCGGT  
TTCAGATGTTTTACTCAGTTGAGCTCTAGTTCATTTCGGTCGGTCTCATGTGTTTCATTAGTTGCGCTC  
TAGTTCGATTACAGGTTCGGTTTCATGTGGTTTACTCACTTAAGCTCTAGTCCGTTTTCAGTTGGTTTCATG  
TGTTTTACTCAGTTAACTCTAGTTCATTCACTTCGGTTTTCAGGCGTTTTACTCAGTTGCGCTCTAGTTC  
GATTCAGGTTCGGTTTCATGTGGTTTACTCACTTAAGCTCTAGTTCGAGGTATCAGCGCGGTATAAGTTCA  
GTATAAAAAGTCACCTGATTTCTCATCTAATTAACTGGACATCTAGAATCTGATTTTCTTTTACAAACT  
TTATTGACATTGATTTGTCTAGATCCTCATAAACATTTCTCAGAATGGCGGAACACTACATACACACAGT  
ATATCAATGTTACTAAATGTACACCGTTTTACGTATTGAAATCAGATTAGATTTTAAATTTCCATTGATAC  
ACTTATAGGTGGGCTTGGCATGGCCTAGCGCGTAAGGCGTGCGCTTCGTAATCTGAGGATCGCGGGTTTG  
CGCCCGAGTCGCGGCAACATGTTTCGCCCTCCCAGCCGTGGGGGCGTTATAATGTGACGGTCAATCCTAC  
TTTTCGTTAGTATAAGAGTAGCCCAAGAGTTGGCGGTGGGTGGTGATGACTAGCTACCTTCCCTCTAGTC  
TTACACTGCTAAATTAGGGACGGCTAGCACAGATAACCGAGTAACTTTGTGCGAAATTCAAAAACCAAC  
TACTCTTATAGGTAGTTAAGATTTTATCAATCTGTAATATTTATAGGCTGAACAAATTTTTTCTTAATT  
TATGTAGCTAACATTGAAAAACAGCTTACTTCAGTATAAGACTGGAATATATTTTCATATGTTTAGTGACT  
TTTAACGTGTCCTTCAGTCGTAGCATTATGGCTGTAACAAAACATTTGAAGAAATACATTTATTGAATTA  
TATAAAAAACGTTTCATAATTCTTCGGTAGGCTTCACTTGGGATTTTCGTATATGTTTCAAACAATTATTT  
TCTAACTTATTTACGAACTCAAATTTGTCTTATTGAATTACAACCTCCATTTAACTATAAAAAATGTATTTCT  
AGGTCTCTTTTATCATTTGTTTGTATTATTAAGTACAAAGCTACATAAGTGACTATTTTTGCTCTGCCCAACA  
CGAGTATTGAAAAACGGTGTTAAGCGTTCTAAGTTTGTAATGTACCGCTGTGCCACTGGGGAGAAAGTTC  
CCCATATTTAAGGCGGTAAAAACGACAATCACAAATAAATACAGCTGGAGTGCATGTTTAAAAACACCT  
TCTCTTGATAGTTAATGTAAATTATTGTCTGAAATAAATGAAGGAAAAAAATTTGGTGAACGTGAAACGT  
CAACATATCAACTTTATCAGTTAGTTTGTATTGGTGATAAATACTTTTAAATCGTGTTAGAACGTTAAC  
TCCCAGATATTTCCCTAAAAGCTGTTATAACAGCTGAATTGTAGCTTATTTCTTTTTTGTACATATTAAC  
ACAAGTTTAAAGACATTAATAGTGTTAAAGTGCTTTTACCAGAATATTCTACATATAAATATATTATGTG  
TATAAAATATGAAATGAAAACTTTAATTTTTATGCAGTGATTTCTCTTAAAGATAGTTGATACTAGTTGA  
GTTATCGAAAGATGTATTATATTAAGATGGTTGATATTGGATGAGTAATCATATAATACATATATTTG  
CTTACAACAAAAGTAAAAATGTTTAATTCTTTTCATTTCAAAGCATATCATGCTTCTAAGCCTTTTAGTCT  
CATTTTATAGTTCTATATAGTTATAGTTCTGTATAGTTATAGTTCTGTATAGTTATAGTTCTATGTAGTT  
ATAGTTCTATGTAGTTATAGTTCTATATAGTTATAGTTTTGGTTTTTAAGAGAAAGTAATCACAAATGAA  
GTAACAGCTAGATTATTTTACTCCTCATAATAAGGGTAAATCATAAAAACAAAAACAGATAAGTGACCTG  
ATAATTTATCTGATTATTGTATTAACCTCGTGTTTGACACATTCTTATTTGAGTAATCCAGTAATTAGC  
AACGTATATCTCAGGACTGAGAATTACTAATTACTTGAAGTATATCTTTAATGTTCCAGCATACAACCTA  
CAGTTTAAACGGTTCCCTCGTTTGATCATTTCCATGATTATGATCTACCTCAGATGTTGTACATCTTTAACA  
TCTTAAACCCCTCATAAAGTTTAAACGATTTCTCGTGCGTTGATTTTACTAATTATTATTACCAGAAAT  
TGAAATTTGTTTACGCATGCGTGAACTAAGGAGAGTATTTAGAAGCTATCGTTTAAATGATTCGTTGGT  
TTTCGAGATTGTCAGGATAGGTACGTTTTTCTGTGAGACTGTTAGTGGGTACCTTTTTTTAGTGTTATAT  
TTGTCAATCATTTGCACTACAGGTGGTCTATACAATTCACACAGGGTAATCCTGTGAGAAGGTGTCGGTG

CTAAGGTGAGATGTTTCAAAAAATTGCTATGAGCAAAAATCCTCTGTGAATTTGACAAGCGTATCCAACTG  
GCTTTGAGATTTGACAAGAAAAATTGGCAGTTATGTGACCAAATCAATGACGTCTTTTTTAAGAGGAGGAA  
ATCTTTCCGCTGGCTGAGTTTTGACGTGGTTATTATATGCTCCAACCTAGGAGTGGACCAGGAAACGTAA  
CGACACCCATATACACGTTACTCGAACCTTGTGAGGAAAATTTTCACTAGTTTTTTTTTTTTTACTTATTTA  
TTGGCCTTGTGTCATTGAAGATCACAAGCGTCTTAATCATAACCTTATGGTCCAGAAGTAAAGAAAAATGT  
TATATATGAGTTAAACAAATAAAAAGATTGAGTTTCTTGCAGAATGACATTCAAAACAACACCACGCCAT  
TTCAAAATTTATGTATCGTATGTGTGTGTATATATATATATATCAATCTGTATATATATATATTTAC  
AGTACTAATGTTGTTGTTAGATCACTTGATTTTTGTGTCTCATGTATTTCTTTTCAAATCGTGTGTTTTA  
AGATAATTAAAGTTTCGTAATGTCAGAAGTTTGTAAATTAGGGTTATTGAAAAAAGATATTTCAATAAAATT  
TAAAGTTCGGTGGGAAAAACAGTTGTTTACAAAATACGTTTGTGATTTAAGAAAGAGTTTGGTGTGCCCTT  
ATTTTTGTAACCGTCATTACCATTTGTTTTAATCTACATCAGCCTTAGACCTAACAAAAGCAAATGGTAG  
CATAATAGAAAACTGAACTTTAAATTA AACACATTTTAAGTAACTAATTAAAGATTTAACAACCTATCT  
ATACATAAATCATGGTTATTACAAACTCATTTGCCAAAACACCAAATATGTACTTTTCAAGCAACATGTAT  
ATATATACACACAGACTAAAATGTAACTACTTTTTGTTTTAAGAATGTGTTACACTGAAAGCTTTGGCAC  
TAATATGGATACATTATCTAAACTTGTTAATCATAGTGGTATATTTATGTACTACTATTTTACAGTAGT  
AGAGAAAATATTGATGCTTGAAAACTTATAAAATGTAGATTTGATAAAAAATAAGTTTCAAAAAAGTTT  
AAAAACAAAAAAGCAAAATTGATTAACCTGTGCGGTTAAATAATAACAACAACAAATGAATGTGTGG  
TTATGCACATAATTATTTAGCTTAGTAAATACGGAAGGATAAGAAAAGAAACACTCAATTTGCAAAAGCTA  
GCGGCCCGGCATGGGCAAGCGTGTAAAGGCGTTGACTCGTAATCCGAGGGTCGTAGGTTTCAATCACGG  
TAGCACCAAACATGCTCGCCATTTTCAAGCGTGGGGGCGTTATAATGTGACGGTCATTCCCTACTATTCGTT  
GGTAAAAGAGTACCCCAAGAGATGGCGGTGGATGGTGATGACTAGCTGCCTTCCCGCTGGTCTTACACTG  
CTAAATTAGGGACGGCCAGCGCAGATAGCCGTGCAATAGCTTTGCACGAAATTCAAAACAAAAGCAAAGC  
TAATTTTAAATTAATCAATGAAAATGCATTTGGAACGATTTTAATGAAAGTGGGAGAATCAGTAGAATATA  
AAAGTGCATAGTAGAAAACTAACTTCTAATTA AAAACATAACGTCAGTAGCTGTGATATAAATATATAC  
TATTATTGTTTTATTTCATGAAATTTAGCGATACAAAACCTGGGAACCTAAAAAATATAATCTTAAACCAA  
TCTTTTGTCAAATCTTTTTTAGTTGCTCGATTCTAGTTGTTTCTTTTTCATTTTATCTTCATACCAAAT  
ACAAGAAATTGAAGATAAGAAAAGCAACAAGTGGTTAAACATATGTATAACCCAAACCAGGAATATGTGT  
TACTTTTACCTGTATTATTTTGCGAACCTACGCTCTTTTGATAATGTATGTTTTACGAGCTGGACAAAAA  
TTTCAAACGGTCGTGTGTTTTTGCTATCCGTGCAGCAAAGCTTAACGTGGCGTATGAAAACAATAGCAAA  
ACTGTTTCAAGAATTATATCCAAATTTCTAGCGACGAAACCTCAAACCGGGAGTGAGGTATACACTTGAT  
GTTTTGCTGTTTTTCTTTGATCATTTCAACACCTTGAAACTTTGTGAATTGGTTGGGATTTCAAGACTGG  
TTTAACCTTAAATTAAGATGGGTACACATACCCCATCGGTTATTTAAACACAATTTTGCAACCAATT  
ACTTGACCATGGCCTATTAACTGTGTTGGATATAGGATTACTGTAACAACATGTGAGTAAAAAATGTAA  
ACATAATTACTTTCAATGTTGTTGTTACTCTCTCTATTATTGTGCCTTTTACATTTGTTTCTGAAAATTA  
TTTACACTGGGTGTTGTAAACGGTAAATAAATTACTCGGTATTTGTGATATACATGTTAAAAACAGCATA  
AAACCGTATAGACAACAAAGATATCAAGATTAAATAATAGGTTGAAGAAGAGGCGAGTTTATATACTTA  
AAGAAGAATGAAGTTTCGAAGTAACAACCATCAACTGTGCCATCAGAAAACCTGGTTTGAAATGTTATCCA  
TCTTTAAATATATATATACATGTTAAACTTCACGACTGTTCACTTTTAAATAAACCAACATAAATACAAG  
TGAGAAATTTTAGGGTTAAAAATACCCTTTTTTGTATTTCTACTTTTATAAATCTTAAACACCAGTTCTTG  
AGCTTATAAACAACTCATATTCATTATGGCCATATTAATTTATATTTTAGCAATTATTTTCATATTGGACT  
CCCATTATTTTATTAGTAAGTACTTAAAGTGTA AAAAAAATGTCATAATGTAACGCACAAGTGAAATTAT  
ATCCATAATACGATACTTCTGAAATATATATGTGGTATTTAATTTTTATGTGTATAATACGATACTTCTG  
AAATATATATGTGGTATTTAATTTTTATGTCTATAATACGATATTTCTGAAATATATATGTGATATTTAG  
TTTTTATGTCTATAAATACGATACTTCTGAAATATATATGTGGTATTTAATTTTTATCTCTATAAATACGAT  
ATTTCTGAAATATATATGTTGTATTTAATTTTTATGTCTATAAATACGATAATTCTGAAATATATATGTGG  
TATTC AATTTTTATGTGTATAATAAGATATTTCTGAAATATATATGTGGTATTTAATTTTTATGTCTATA  
ATACGATACTTCTGAAATATATATGTGGTATTTAATTTTTATCTCTATAAATACGATATTTCTGAAATATA  
TATGTGGTATTTAATTTTTATGTCTATAAATACGATAATTCTGAAATATATATGTGGTATTTCAATTTTTAT  
GTGTATAAATACGATATTTCTGAAATATATATGTGGTATTCAATTTTTATGTGTATAAATACGATATTTCTG

AAATATATATGTTGTATTTAATTTTTATGTGTATAATACGATATTTCTGAAATATATATGTTGTATTTAA  
TTTTTATGTCTATAATACGATATTTCTGAAATATATATGTGGTATTTAATTTTCCATAGTAACTGACGTA  
AACTATTTCTCTATATTTTGTATATAGCGAACTCTACAAGCATTTCATAAGAAAAACCTATATATTTTAAAT  
ATTTTTGATCCGATATATTTAGGTATCTTCCATCAATCGAGTTTTAAGGAATCTGACGAGTCAGAAAGAC  
CAACAGGAAACTTCTCCTCACCATGTCCCCATGACTGGACCAGAATCAGTTTATGACAAATTACGGTTGT  
TAAACGGTTCCCAGCCCTGGCCCTGGTACCCGACCGGCCCTCTCACCCTTTACGGCATCCCTCCTAC  
ATCATCGCCAGTTGCTCTAGGTCAAAATGCGGGTCTTATGGGACCTGGCCACGGTGGAAATAGTCACCTA  
GGTCTTGCAGCGTGCAGAGGCCACCGTCAGGATCATCCTAGTGTAAAAAAGGTAAATATTTTGACTTGT  
ACGATTGTGAAACCAGGAGGTAGTAGTTAAATAAATAAATCAAACCTGTTTTTATATTTTTATGACCGTGA  
TCATAAAAGGTTTATTTGTCAAGGTTGTATGGTTGTCTCTCTACTGAAGGAACAACAGTGTAGATTATTG  
ATTATTAGGTAAATGATTCAAAACACTCCTTAGTAATCTGAAATACTGTAGAAAATTCAACAGTGAACGT  
ATTGTGGATTTAAAGTTTTGTGAGGTATTAGTAGAGAAACAAGAACAACCTCAATGAAAGAGAACAGAGAT  
TTAGATAAAAACTTCCACTCGTATAGTCTGAGAGCATGGAGATGAAATTGCTTATAGGGTTCAGTGCAT  
CATATATTAAGCATGATGTGTGTGTTAATAGTTTATAAGTTTGACTAAATTCGTGTTATGAATTAATGTG  
AGTCAATTATACAATTTTAGTTAATCTAACAGTTCGGCCAAATATGTATTTATGTGTATTGCCATTCA  
TCCATGATACTTTGAATGAAAATATATCAACACAAAAACATTTTGGAATACATCTAGTTTTTTCACATTAG  
AAATTATAAGATAAACTGTTTCATTAAAGAACTAATGATGTATATCTTTACTCTGTTACAATAATGGTT  
GTTAAATATTGATGAATAAAAGTGCTATGGCAATACATTTATGCTCTCTCGTAAGCTTTTGATTTCGAGTT  
TTCTATGCCTAAAAATAACCTAAAACTGAGTTACATATAATTTAAGTTTAGAATTTAAATAGATGTTGAAA  
TGTATTTAATTCATGACATTTGTCAACAAGGTTGATACACACAGTATTCTTTTTCTAATACAAATATATT  
TTAATATATTGACACTAAAAATTTACAATAATGGTTATTACAAATAATGACCAATGTACAAAAGTTTTAC  
AACTTACACAAATTTATGAGTATTGTATCTGGTCTGGGATGTCTTTGATGTCTTGGCGGGGGTTCACGA  
TTAACGAATTAATTTGAGTTGATGTAGATACAATTTATTTAACAAGAAGCAAGCTAGCCCTGTGTCTT  
TGCCGAGTTTTTACTGCTGAAGTCATGCAATGTCTTTAAAAATACTAATATCCGATGTGAATCCGTAAAT  
GTGAAATGGTTTGAATGTTAGAAATCTATAATCGCTCCTAGTCAAATATCTAAAGTTCTCAATTAATAA  
CAATTACAGCTTCCTAGCTTTAGAGTATACCAACTATAATATAATAAACCAACAGTATATACTGTTTTTT  
GGCGTGTGGCGTTGGTTACACTTATAGGTGTGAGGAAAGTTTCTCCAACTATAGGTGACACAACAATAT  
TTACGTTTACACACACACATTGTTAATTCTTACATTGAGAAACTTCTACAACCTTTAATGAATAGATGGG  
AATTTGCAATACAGATTTAATGGCATAAGTTATGTACATTTCTAGAAAAAATTAGCTTAAACAAACATC  
GAAATTTAAATCTATGTCCGAAGGTATATCCGTCCCAGATTCTACGTCACAGACTGCAAAAGAAATGTCTC  
TTCAAGCCGCAAGAAAAAACTCATTTTGTAAATGACTAATATGAGCAACAGAATGTAATACTTAAATTT  
ATGAAAAGAACCAAAACGAATCAGGAATTACACAGTCTCTGTAGTAGTTTATAACTTATAGTTTTCAGTT  
GGTCATCTAATGATATATGACAAAGTAATACTCCGATACTGGTTTTACAACAACATCTTTTTGTTTCATC  
CTGACAAATATGAAATTTAATAACAAATTATGTCTTTTCCATAATAAACATGTTTATAAAGGCATCGGCTA  
TGGGCATGTTATTTGGTTGGTTGTTGCTAGTCTAAGCTATCTCTTTTAAAGATATCTGCTTAGCTTGTA  
AAGGTGATATGTCTGTCAGGTTAAAAATGTTATTATTTAAGGAAATATATTAGTTAAATGTTTCATTTTAT  
ATTCCGAATATGGCATGGCCAAGTGTGTTAAGGCATTCCACTCGTAATCCGAGGGTCGCGGGTTCGAAAC  
ACAATCGCACCAAGATGCTCGCCCTTTTCAGTCTGTAGGACGTTATAATGTGACGGTCAATCCCACTATT  
TGTTAGTAAAAGAGTAGTCCACGATTTGGCGATGGCCCAAGATAGCTCTCGAGTAGCTTTGTGCGAAATT  
CAAAACAAACAACAAACAAACAAATTTTCGCAAAATATAAAAAAGTCAAACAAAATAATAAGTGTATTATTT  
GTGATGAAAGATTCGGTAAAAATTACACTCAATAGATAAGAGCATGACAATATTAAACAACGAGTGGGTG  
GATGTTACGTTTTATAACTCGTGTAACGGAACAACGTGACGATATCATGCTATTAATGGATGAATACTG  
CAGTTATAAACTACGGTAAAGCCCAGTATTAGTTGGTGAAAGAGTAGCCAGGAGTTGGCGGTGGGTGGT  
GATGACTAGCTGCCTTCCCTCTAGTCTCACACTGCTAAATTAGAGATGGTTTGCAGATAGCCCTCGTG  
TAGCTTTGCGTGAAATTTCAAAACAAACCAAAAGGTTGATCAGATCAAGGATTTAAATTTATAACA  
TGCAGATTTGGTAACGAAAAACCAAAAAATAGAAATAAGAAAGAAACCTATAACATTGCTTTTGCAGCCGT  
GGTAGGCTTGTGAGAACCCGTTAACGCTCACGTACCTCAGAGAAACAGTAAGTAAATAATCAAAAGGAT  
CTGTATCTGAAAGCGAGGCCAACAGACTATGAGCTAGTTTTACCAAGATAAACTTGTGTGCATATCTCT  
TGTTGAACCACTACATATCTCGCACAAATAGAAAATGAATTAACAACCTTCTATTCTTCAAGAAGGCAT

AAAATTTAAATAGCTGGACTTAGCGCCTATGAATTTATGTGTAATATAACTATTGAAATAGGTACTTAGA  
ATCCTCTGTTCTCGTAGGCTAGATGAATTATGAATCTATAGCACGTAGTGTGGACGATACATAAAATAA  
CATGTTGAAATGATTTTTGAGAAAGGATGCACGACCGTCAGATATAATACGATCAGACACAGCGATATAG  
ACAGTAATGTTTTAACATAGCGTATTCAACCTTTGTTTATATTATGATAATTCATGTTAAAGGCCAATAG  
ATTACGGGTGTAAATTAATATTGCGTTCAATAACATAATGAAGGTGAGTTGTAAATTCCTGTAGCAGCAAA  
GTTAAGAATTATTTTATCAGGCTTTTCGTGCCGCTTCGAATGTGTTACAAACATGGTGTAAATTCCTTCC  
TAACTGTCTGAAAGCGTTTCAGTAGATGACACTGATATAATATATGTGCTGTTTGTCCGCTCTATCATAT  
GAATATTTATCGTTAAATGACTTATGGTATAGACGGACTATGACGACATAAAAAATTGAGACCTGTGTGCT  
GTATTAACCTCCTATACTTTTAGTCGAAGTAGATAATAGATCTAATGATGCAGTGTGCACATATGGGAGAT  
TAAATAAAGCGAGCACATGTTCTGGGTTGTTTTTTTACTCCCTGGCCTCTCGTGCCAACTGATTGCCTAG  
CAAGCTACCGTGTACATACGGTTTCCCAGATCTAGAAGTCAGTTCCAATTCGGCCATCTACCGTAATATGG  
GATTC AACGTAGGCTGTGCGAGAGAACTCTCTTGTTTTGTTCTTAAACGCACATGTTTGGAAGCTGGCG  
AAGTTCAGAAACACAATAGTTGAGATCTCTTTCTTTTTTGGCTCAGCCGGCGAGATTTCATGTGACGAATG  
TTGAGGAGTGAAGGGGAGGAACCGCGTGCGAGTCTTAGGTCGCCACAATTCGTGAATAGATCGCTCAAA  
CGTTTGTATATATGTGTACGTGTGTGTTTGCATCAGTGAAGTTTGTTAAGAACTTACACAGCTCAGCTTT  
TGTCTGCTCGGCTTCGTGTATCCTCGAAGCCAGCGACGACCAAGTATTCCTCTCCTCAACTGTATCACA  
ACAAAGAAACAAGCTTTTCTCTCCTCATGTTTTCTTGCGCTGTACTCTTGATCTCTCCCCAATTTTCTGT  
TTAATTTCCGATCATATGTATCATATTCCTTACTTTTTCGTTTATATTGTGTTTTATATATATAAACTTT  
ACCGCAAAATACCTAAAAACCAATAGGAGATTATTGTTGATGCGGTACACGCCCACTAGGGGGTTAAT  
TACCATTTATGGTCAAACGATTTGCAAAATTACGAAATTTACAGATTTTGTACAATGCTGTACCTTTTGA  
GATAACTTTTTTAAAGAACTCACCTCGCCAACCTAAGATGTCCGACAAAAGTTTCTGCCGGAAGAACAGC  
TTTTAATCCTGTTTTCTTATTGACTGTATCCATACAAACCGTGCAGAAAAAAGGTCTGTAAGTTTTTCATG  
TTTCGATACGAGGCTGCGAAAAGCAAATACTCTTATATAAAAGCACACAATGTTGACCATTTTAAACAGCT  
GTATTGATAAAGCATTTGATGTTTTCAAATAGTCACACAGTTCAAACTCAGTAAAGATTACGGAAGG  
GTAAATAACAACACTAAGCAGAGATAACAATGAACCAAACACTACAAAACATGAGAATTTGTGCAAAAC  
ACTCACCGGATGAGGTTTTAACCGCGAATACAATAGACATATTTAATGCATGCCGAATATATTCGTGTCT  
TTGTACCACACGTTGTTTACAACGAGCTTAAAAACTCCTTGAAATTGGTTTGTGTATTTCAGTGACAAAC  
GTAATACTAAAGAGGTTATAACATAGACAAAGTCATAGTTGTAAAAATCCAAACAAACAAGAAGGTATGT  
TCCATAAGATAGGTAGTAAGGTAAACATTACAATTTATTTTCCGATGACTTTTATCCAGTACCTTCTTAC  
AATAAAAAATTCTGTCGCCGCCCTCCAACCATATTATCATGATATTGATAAAATTCATAAGTCATTATTTTCA  
CTCTTGAAAAATATAACTTATCGTAATTTTTTACTATGGATTTACTGCCGTGTCTTATTATCCTTACTGA  
TAACAAAATGCTTTCATTTCGTTAACATCATGTTGCCATTAAACTAAATAGAAAAATAAAAGTTGTGTT  
ATAAACTAGAGAAATATAAGGTTGTGTTATAAACTAGAAAAATATAAAGTTGTGTTATAAACTAGAAA  
GATATAAAGTTGTGTTATAAACTAGAAAAATATAAAGTTGTGTTATAAACTAGAAAGATATAAAGTTG  
TGTATAAACTAGAAATATAAAGTTGTGTTATAAACTAGAAAGATATAAATTCAGAAAAATCAACAA  
TCCAGTGAATCTTTCTTTATAAGAATTAGCATAAAAACTAGGAAGTTGCTTCGACAAGAGATCATGGCT  
TGGTATGGCCAAGTAGTTAAGGTGCTCGACTCGTAATTTGTTTGTGTTTGTGTTTGGAAATTCGCACGA  
AGCTACTTGAGGGCTATCTGTGCTAGCCGTCCCTAATTTAGTAGTCTAAGACTTGAGGGAAGGCAGCTAG  
TCATCACCACCAACCGCCCACTCTTGGGCTACTCTTTTACCAACGAAAAGTGGGATTGACCGCACATTAT  
AACGCTCTCACGGCTGGAAGGTGAGCATGTTTGGCGCGACTCGGGCGCGAACCCGCGACCTCAGATTA  
CGAAGCGCACGCCCTTAACGCGCTTGCCCATGCCAGGACCTCGACTCGTAATCCTACTATTCTGTTGGTAAA  
ATCGTAGCACAAAGAGTTGGCGGTTGGTAGTGATGACTAGTTGCCTTCTCTCTAGTCTTACACTGCTAAAT  
TAGAAATGGTTTGCGCAGATAGCCCTCGTGTAGTTTTTCGCAAAAATAGCCCGGCATGACCAAGCGTGTT  
AAGGCGTGCGACTCGTAATCTGAGGGTCGTGGGTTGCGATCTCCGTAGCGCCAGACATGCTCGCCCTTTC  
AGCTGTGGGGGCATTATAATGTTACGGTCAATCTCACTCTTCGTTGGTAAAAGAATAGCCCAAGATTTTG  
CGATGGGTGGATGATGACTAGCTGCCTTCCCTCTAGTTTTACACTGCTAAATTAGGGACGGCTAACACAG  
ATAGCTCTCGAGTAGCTTTGTGCGAAATTCAAAACAAACAAACAAACAAATTTTCGCAAAATATAAAAAA  
AATTAACAAAATAATAAGTGTATTATTGTGATGAAAGATTGCGGTGAAAATTGCACTCGATAGATAAGGG  
CATGACAATATTAAACAACGAGTGGATGGATGTTACGTTTTATAACTCGTGTAACGGAACAACTGTGAGG

ATATCATGCTATTGATGAATGGATACTGCTAGTATTAATAGTTTCATGTTTCAACTGAAAAATATTATTTAT  
TTTGGAAGCATGTATACTTTTATAGTTTCAAGTACGTGGGCTACATTTTTTTTCCAAGCTCACTGTCTGAT  
ATAACATTTTCCCCAGCGGCACAGCAGTAACCTCTGCGGACTCACACGCTGGAACTGTATGTCAATACCT  
GCGGTGGGCCCAGCTTTGTGCTTTATTCCAAAGAATCAATGAATCTGGTATGAAATAATCTGAGTGCATT  
TTGACGTCTAGATATAATTTTATGGGTAAAAAATAATACTATGTTTGAACAATTTTTGAAACAGTAACAA  
TCCTTCTTGATATGGGGTATAAACATATTCAATCAGCTATAAGGTTGGGGATTAAACAGATAACAGAGA  
GAGTTGCTGGAGAGGCGTCTTCAAGACGCCATCTATAGAAGAATGTATGAGTTTCGTCTCTATTAAAGT  
AGCACTGGTTGAGGCTGTACTCGACTGTCAGAGGATTACGGGATTTGTGTTCAACGAGTTGATTATCAG  
ATGGAATTCTGACCTATTTCTTTAGAAAAGAAATGGAATCAAAGACAAGCCGGCGCCGCCGTCAAGCTAG  
AAGACTCTTTTTTCGGAAGATGACATTTCAAATAAAGCTTCGCACGTGATTATTGGGAGAACGACCCCCG  
ACCCTCAAGGTCGACCATACTTAATATGTATTAAGTTTATTTAGCTAACAGTTTGCTTTGATAATGCCCTT  
AATTACCTTTCTATATCCATCAGAACATATGTCAGTCAGACCTAATTACTTGCCTGTTCATTTTGGGGG  
AAATCAACAACATGAGTTGCTCGTTAGGACATTAATACAAATGTTAACTCATGACACGTCTTCCATCGTC  
ATTAAACATTAGAAAGTTTCAATCTGTATTTTAAAGCCACAGTTGTTTGTTCCTTTAGAATTAAGCACAAA  
ACTGCACGATGGGCTATCTGTGCTCTATTAACCAAGGTTATGGAATCCAGCTTCTCGCGGTGCGAGTCG  
CAGACATAACGCAATTTACTGTATTGATATGGTGGAGTCCATAGTTTGAACCTTTTATGTTATGCTTGTAT  
TTTGCCGTACTGGTTCACACGGTAGCTGATGATATAAATGGTACTCAGCGAAGGACTGTTTAAAGTGCA  
ATCTTGTGACCCGTATCGAAGGATGAGGTTTGTGATTTTTATTTCAAGTATATCGGCCACATGATATA  
AAGCTCGTTTCGTTTTTTGAACACCTCTCATAGCTTGTGTGCTGAATGTATGTAGTAATAATAATCTTAA  
CTTGTCTGTTGTATGTTTATGTAACCTATTATCTACGTAAATATAATAGTATTGTATGTTGTATGTCTAAG  
TATATTTCTATCTATATAAATAATAATAGTAATGTGTGTTGCGTGTTTATGTAACCTACAAATTTATTTGATA  
TAAAGTACTGTCTGTTGTATGTTTCGTGTAACCTAATATGTATATAGATATAACAGTAATGTCTATTGTAT  
ATCCAGCTAACTACTGTCTATATAGATATAATAATATTGTCTTTTGTATGCTCATGTAACCTAATTCGTAG  
TGTTGATGGATCTTATCAAAAAGGTTTATCAGGTACATGCGTGGTTAGACAGTACTTTTCAATTTTGTA  
TTTTACGATTTTTAGGGCGTTTTTGCATTTTATTATCCCTTTCTTCACCTCTGTTGGTTGACCTTTACC  
AAATTTGGTATGGAAGTTTATTGGGTACACGGAATATGCTAATATTTGGTTTCACTTTTCTTTTCTTG  
CAGTTTTGATAAGCGTTGTTTTACAATTATGTGTAAGGGAAGCAACTTTTTATGTTCTAAGGTAACCTTT  
CCGTAATCACGATGTTACGTAACTTCCGCCCAGAGCTGGACAGGTAAGTGCAGCTAGTATTAAATAATAAT  
GTTGCATTTTCTAAAATTAATTATACTCCATCTAGTATAGGACTACTTTTTTAATTACGTATTTAAACCGT  
TTTTGAACCTTTTTGAAAGGTAAGCGGTACAGTGTCTCTGTGTTCTTATTCTGAAGTCATTGCAACCAGT  
AAACACATTTTTTAACATATATAAAACCTTTTCAAAGTTGTTTTATTGGAATATAGTATCAAGATATCAGC  
TTGTTAGTTTTAAAAAAGAAAAATAAATAAAGTAGACTTCTCGACTTCCAGGTGATTGATCTTCCCAAGT  
GATTGTAAATTTACCATTTAAACATGTGTTTATATATCAGTTGATATTTATAAATAGAAGGGATAACCGTT  
TATTGTAAATTTAAGATAGTGGAACCTTTATTCTGAGTGGTTTACAACCTTAAGAACTACTATAGCTGGA  
CTTGGTTGTAAGATTTAGAAACCCAGCAATTTTACTGTTCTATTTATATACGTATTAAAGATCTGTTGAC  
AGCTTCTGGTTGTTGATTATCCGGGAGGGTATTCCTCAAAGGGCGGCACCTTTAGAGATGGACAAAGGG  
CAATTTTCTTGAGTGATTAGGACTAAGCACCAGGGACCACTGATTCTCAATAGAATACCTCCTTCTTCT  
TGTTTACAGCAATTATTGGAGGCCGATAGGAACCTTCAACACCAGACTTGTCTCCTGATGGGTCTGTGG  
TAGTTGAAGGTATAAAAGAGCCAGTCATAATTTTCGGATATCTCGCACGTACAAATGACATCAGCACTCC  
ATTTGGTTATAATTAAGAAAGCTTGTCTGATTTTGGCTTGAGGCCAATGCCTTTTCTCAAGCACTAGTCCCT  
GACCTCTTTGAGGATTTACTTAACTGAAAAGCTCATCAGTGCTATCTGCGTTCCGTATTTATCGGTTGTC  
GCGCGTGGTCTCCAGATCCCTGTACAGTGACAATAAACAACCATAACTTTCTCGTTCACAGATAATTTA  
AACAGCTGCTAGTTAATACAATGTTACTGTCTCCAGCCTAGGATGAGCCACACTCATTTTATATTGCTA  
ATTTAACAGACAGATTTGGATTGTTTTTATTGAATATTAATAGGTTTTTTTTATGAACATTTTATTAACA  
TGGAACACTTACTGATAGATATAGCTCCTATATTCAAAGGACATTTTGTATTTATGAAATACGAATACAT  
ACCTTACTTGTAAAAAGTTGAAAAACATTAATATGTTAAGAAAAACCTGGAATATGCTATACATCGTTTTT  
TATTATTTTTTGCCAAATATAAAATAAAATTGAAGATAGTTTCACTTGTAAATCAACTGTAATTTATTC  
AGTTTCAAGTCTGTTCTCATAGTTTTCGGGATTTTACTGTAACATTTCTTTACAATGAACCAATAATTTGA  
TTAAAGAACTTTTTTTCATAATTATCAATTTTACTCTTTCAACAGCTTAACATGAATTCCTCTTTACCTT

TAAACAGATTCCATAGATGCAACTTCTGACGGAAATTGAGAAAACAATTCATCTGCAGATGAGGACTCGCAGCTGCGCATGCGTTTAAAGAGAAAACCTCAAAGAAATCGGACATCTTTTACAAACGAGCAAATCGAAGCTTTAGAAAAAGTAAGAATTCATTTCGTACTGTCTAAGTCTTCAACTGGAAAAGAAATTAAATGTAGAGTATTTCTATTGGTCTATATTAAATGTAGAGTATTTTATTAGGCTATATTAAATGTAGAGTATTTCTATTAGTCTATATTAAATGTAGAGTATTTTATTGGTCTATATTAAATGTAGAGTATTTCTATTAGTCTATATTAAATGTAGAGTATTTGTATTGGTCTATATTAAATATAGAGTATTTCTATTGGTCTAAATAAAAAATTAGAAATATTTTCTTCATTTTATTTTAAATGTTTCAATTTGAGCTGTTGATAAAAAACGTAGTATTCTAATGCACATAATTTCATTTAATTCAGAGTTTCGAAAGAACACATTATCCAGATGTATTTGCAAGAGAAAGATTAGCTGAAAAGGTCACCTCTTCCTGAAGCTCGTATTTCAGGTATATCTGAAAACAACAAAAATAAAACGTTATTTACAGCACTGATGACGGTGACTGGGTCACCAAAACCTATTAAGTATAAGCACCTAATGAACTTTTATATTCCAAATGTTTTGTGTTCTTTTGTATTCTACATATTGTGTATTTATATGAACTACTGGTATGAAATGTACAATTAAGTAACTGTTTTACCGTAATCATTTGGTAAAAAGTAATTTAGGCACATAGATGAGAAATAAAACAAATACCCTGAACATTAGTCAAATCAATCCTGTTTAAACAACTTATCGATAGCGCCTAAACCGTAAAGTCAATACAAACGAAATTAAATTTATAGTGATTAGATTACACTGAAATATCATTGGATATAATCTATGTTTCCATCTATATTGTGGCCGTAAACGCCAATAATTTTTATGAAATTTGTCCAGCGCTGGAAATTGAGGTTAGTACTAAGTCCATGTAAGTTAACATATGCCAAACAATTCTCATAAATATAAAACATAATGAAAAATAAATTCATAACACAAAACGATGTTTCATGTGTATTAAACAACCTGATCAATGAACTAACTTTAAAAACAAAAATGGAATATAGCATAAAAAACTAGTTATTTCAGTCAACTTAGAAAGTTTAGGCTAGTTCTACACCGATATATTAATTAACAATGCTAAATTAGAGTATATAGACCAGATTCATGTAAAAATACAATAGGCTAATGAAAGTTGAAATAGAGGAATTCATCGTTCTTCAAATAAGTTACCAGAAGTGAGGTAGTTAGAACTAACTGAGAACAAAATGTTCCCTTTTGCCCTCATTTATTTAGACTCATATTTTCGAGTATAAATTTGTTTGAGATAATCGAACAAAGAGTCCAGAGTCATTTATGCTTCAGGTATATTTGAAATGCTACATTTTTAACACGTCTCCAGTTTCAGCCACAACAGATAAATTGGAAGAATAAGTGATAAAACGAGCTAGCTGCAGTAACATGTTTTAATTACTGAACATTTTCCATAGTTCTGTGTACTTATTAGTAAATATTCTATAAGTTCCAAATAAATTTGTATATAATCTATTTACATATCTTCATTGTCAATTTGTGAAAGAGAAAACTGAAGATTTTTATTAATCATATTTATTTGTTTCATTCTCAACATTCGTATTAAAAACATCTATTTAGGTATGGTTTTCTAATCGTCGAGCAAATGGCGCGAGAAGAGAAGCTTCGTAACCAACGACGTGTAGTCGAACAACCAACAGGTACAACGTGTGCTAGCACCACCTAACGGACGACTTCCAATTAAATGGAACCTTTTATAACTCAATGTATCCATCACTAGGACAACCGATGGCTGGAATGGGAGATTCTTACAGGTAGTTAGTTGAAATGCTACTTTTTTAACACATTTCTAATCTCTAGCCACAATAGACAAATTAAAAACGTAAATGGTAAATGAACCATATGTAGTAACACGTCAACATTTAAAGTTCTTTTTATCATGGTCCCTCGGTAGTATAGTGGTGAGTATCCCCGCTGTACGCGGGAGTTCGGGATTCTGATCTCCACCGGAAGTACGTGTATTTTTGGCCCGGTATGGCCAAGCGTTGTAAAGTGTGCGACTCGTAATCTGAGGTGTCGCGGGTTCGTATCCCGGTGCGGCCAAACATGCTTGCCCTCCAGCCGTGAGGGCGTTATAATGTGACGGTCAATCCCACTATTTCGTTGGTAAAAGAGTAGCCCAAGAGTTGGCAGTGGGTGGTTATGACTAGCTGCCTTCCCTCTAGTCTTAACTGCTGAATTAGGAACGGTTAGCGCAGATAACCTTCGAGTAGCTTTGTGCGAAAATCCAAAACAACCAACCTTTTTATCATAATTCGAGAACAAGCATATCAGATTAAAGCATCTGTTATGGTGAACACCTGTTAAACGTAGAGGTACTTCAGATGCAAGTAGGTTTGCAGTGGCCTAACTACTATTATTTGGCTTTAATCTTTTAAATTTTCATTTGTTTCAAATTACACTAGAAGGTGTTTAGGGCGCTAGACTCGTAATCTGAGGGTTGCGAATTCGAATTCAGTGCCTGTGGGCGTTGTAACGTTACGACCAGTCCCACTATTCTTTGGTAAAGGAGTAAACCAAGTAGCGGTGGGTTGTGATGACCAGCTTTCTTCCCTCTAGTCTTACATGGCTAAAATTCGGTTTCGGCTAGTGCAGATAGCTCTCGTGTAGCTTTGCGCACAATTATGAAACAGACAAAACAAACAAATGTAAACACGTAAATTTTGTATCTAGTATTTCTACAGTTGTCTCTAAAAGTCCATTTGTGAAGTTCTTTTAAATATTTCTTTATGATTAGAAACCGAACGAATTATTTGTACGAGTACAGATTGTAGGCTAATGCGTGCAGTAGTTTGATTTGCCACGTGCCATAGTTATGACCTTTTTAGCACATCGAACATGGGTCACGTTTACTCATACTTGACGTATCTAAAGTTTTGTCTGCGTTACTTCTTTTCAGCTCAGCTTAAGATCAAATCATAGTTGATACATGATGGCAAACCAAACTTCTTGTGGTTGTCTTAGTATAGAGTATTTAGGGTAACCCGGATCTTGAAGATAGATTGTTTATAATTATTTTGCATCAAAAAACAGTACAACGTGTTGTGATTAACAAAAGACTATATATACCAAATCTCCCTACATATAAGCCTCATCTGGATTATCGACTACTTCACCAATCAACAAGAACGTAACCTTTCTATCATAGATAAGTTTAAATTGCAGTTCTTAGCTTTTGATTTATTTGCTTCCTCATTATTA

CACACAAAACCTACACGATGGGCTAACTGTGTTGTGCCTACTTCAAGTATCGAAACCCTGTTTTATTGCTG  
CAAGACTTATCGTTAAGTTACTTGTCAAGGGAGGGTCTTAGTTTTATATCCGATATAAATAAGTTATGAAT  
TACGTAAAAGTAATTATGTCTAATTTAATTATATTTAATTTTCGTACAGGTTAACAAACACTGACTATTA  
AATGTGTTATAATTTTAACTTAACCCCTGTTTCGGCCCGGCATGGCCAAGCACGTTAAGGCGTGCGACTC  
GTAATCCGAGGGTCACGGGTTTCGCATCCCCGTCGCGCCAAACATGCTCACTCTTTCAGCCGTGAGGGCGT  
TATAATGTGACGATCAATCCCCCTATTTGTTGTTAAAAGAGTAGCCCAAGAGTTGGCGGTGGGTGGTGAT  
GAGTAGCTGTCTTCCCTCTAGTCTTACACTGCTAAATTAGGGACCGCTAGAACAGATAGCCCTCGAGTAG  
CTTTGTGCGAAATTCAAAAAACAACAAACATTTAACCGCTGTTATATATCATTTGACGTTTTACTTTAG  
TATACTTCTCTAAGCCTATTTTCTTATGACTTCTTGCTGATAAAGTCTACTTGAAGTAGCCAGATTACTA  
GTAATAGATTTGGTGATGTATTTTCTTTTAATATTATTTGTACTGTTTTCTTCCTGTGTTTTAAGTTATTT  
AGGCATAGGCAGTTTTTAATTTATATTATTCACTTTCATGAAGGACAGTTAAAATAAATAAATCTATGTT  
TATTGGATTGAAGTAATTAACCAGAGGAAAAGGTGCATTTCTTTATTATGTTTTAAATTTTGTAGTAAAT  
TG TAGAAA TAGCTGTGTTGGGATTAGTTTTATATTTTTTTAATTTTAATTATGTAATGAATTTGACTTTT  
GATACTATCAAATATATTTCAATAATCTTGAAAAATATTTTCCCTCAGTATTAACAAAAACACTACAT  
TTTCGTCTGACACTTACCTTAGACATCAGTAATATATTTGGTTGACGTATTAAGATCTCCCGGTCACGTA  
AAAAACAACCTCTCTAAACGTCGCGCTAAATTTTGAAATATTATGTTCCAGAAGACGCTGGTTGGTATA  
AATAAGCCACATGACTCTACTATACAGAAAATTTTTTTCAGATTTGAAATCATGAATTATGTGAAAAAAG  
ATACAGCTTTATATTCTAGTAATGGTTTTAGAGGTTTCAGCGTTTCCATCTTCTCCAGAATTAATATCAT  
ACAACCTTGCTTTCTTTTAATCTAATTCTATTTTGACCTCTCAAATCACTTCTTCTCAGTACTTTTCTT  
CCCCACTTTTCAGCGTCATTTCTTTGCTTCAAATTAATACAATGTGTGTTATTCAAGCATCAATCTAAATA  
TGAACAACATATACAAACGACACACACGATGAAGGCTCCTTTCTTTCTATGTTTATGTTCCCTGGAAAAGC  
ATTTTGCAGATTTCACTTATGAGTATATAATTTTTTCAATCAGGAAAAGAAGTTCTTTTTTATATTGTTT  
TCGGGTCTGAACGTATATTTCTAAATCTGGGTTGGTTTTCCGTGACAGGGGGTCTTAAATTGTAGAAAA  
AAACGTTTGTCTTTTCCCTTACAATTTTAAACATTCTAAGTCATTTAGCTCATCATTTCTAATGAAGTAT  
TATTTGGTATTATCGGTGGTTAAGCAATGGGAACCTATTACACTATTTTTCGTGTTTTAATTAATTAATG  
TGATTTCAACAATGAATTTATGATTATGTGTGTGGTGTTTTAAACAGTAATATTTTGTAAAACTACTTT  
ATAAGTTTCTATCTTATTTGGTAAATCGATTATAAACTTTAAATTATTATTGACTTATAAATGAAGA  
GGTTATAATGAAAACCCGAAACTCTGTATGCAGATAGTAAGCATATAAGAAACAGGTTTTTCCGTTGTCT  
CTTTTGTGTTGATAGAAAATTGTGACCACATCATAAACTTTAGGCGCAATATTTTACAAATAACTTCCCTG  
TTTTTGACTTCTAATACCAGCTAACTGACTACTTGTCCATCCTATATGTTTACAGTGTACCACCATCCAG  
TATAGCACCAAATCATTTGTGTGCAGCAACGTGATCCTACTTCTTACACCTACATGTTTCACGATCTGGGA  
TCTTACTCACGATCATCTTGTACACCCAGTCAGTCAATTAACGGACACCCGTCTTACTCTGTTAATGGAG  
GAAGTACGCATGGTGCAGGTGAGTAAAAAACACTGTAATTCACATACAGAATACACACACTCACAGAATT  
TAAATTTAAATACGGCATAAACTTGAGTTTATATTGTTAATATTAAGTAAGTAAATATAAGTATCAGAA  
ATTAGATTACATGAAAAATAAGTGTAATTAACTGCTGAGTGCCAGAGGACAATGTTTGGATAAGACTA  
ATTGTATATACAGTTTATTAGAGTAGTATAGATGTATTTTATACACAACTCATATATATATATAGTAG  
TTTTTAACACGCAGTTCCCTTATTATTCCAGGTGTAAATTTCTCCAGGCGTGACCGTTCCCTCTGCAGGTACC  
AAGTCAAGGTCCTGATCTGTCAATGGCTACAAATTATTGGCATCGCATTACGTGACCTCAAACCTTATAGA  
AACGACTACTATTCTGTTAATTGTACCTTTTAATGTTACAATAAAGCTTTGGTTGAGCTCGACTATATAAAA
