# Supplementary material for: Evolutionary Conservation and Diversification of Five Pax6 Homologs in the Horseshoe Crab Species Cluster
Source: MDPI journal article supplement (doi:10.3390/arthropoda2010007), 2024-03-04
Supplement: s1 [file s1]

>QXHF01014388.1:c2012992-1935903 Tachypleus tridentatus isolate BBG1 scaffold1573, whole genome shotgun sequence  
GGAGATCCGCCACAGCTAGGCCTAACTCTCGTTCTGTTGGCTTCCCGAGTCTGCAGTCGTCACCAAAG  
ATGCCACACAAAGGTAAACATGATAACTGCATGGTGTCTTCTGATGTCTTAGTTTGTGCATTATATAAGG  
TTGTCACACTGTAGCCTTAAGGAGTCAAAAGAACATTGATACTGGTGTGATGGTAGTTTCGTTTCGCATTA  
AACACTGTCGACGTACGTGGTGGCAATATGGTCCATATAAAACACAGTTCCTTAATGTAGTGGTATTTTCG  
TCTGTACGAAACACAAAATCATTCTTGATATAGTGGTACTTCCGTCCGTATAAAACACAAAGAACACTGG  
ATACGATGGTACTTTTCGTCCGTACAAAACACAAAGATCACTGAATACGATGGTACTTTTCGTCCGTACAAC  
ACACAAACTGATTCACTGAGCACAGCATTGAAGGTATTCCATTTTCTTAAATGCAGATGTGAACGAAAATA  
AAACCAGCCTTTAGTTTCTGCGTCAAAATGAAACATCTAACTTTTCAATGTAGGTCCACATGTTGCACA  
GTTTCAGCACAGAGGAGAGAGGGGATTAAAGAAAACAGAAAACGAACAGTGTTGAATCGAGACCTTTCAAC  
ATGGGGGATTATGACGTAAAGCTGGAAAGAAATTATTAGTATTAATAATTCAACAAAACGAAAAATACTGT  
ATTTTCAGAGGGGATTTTTCGGAAGAGGAAAATCCACCGTCGCCCCCTTTAATTCGTCACTGTATACAAATA  
GACAAATTAATTAATGGCGTGGTTGACCAATAATGTTGATCAACCACCAATACCAGTTATTACATGCACTT  
GTATCCAAACACTGAAAACATAGTTGCCCAATCCACAATAACATTTTCTTCAAAGAAATCTAAATACTTA  
AAAGCAAGTACATTTTACACGTGTGAAATAAACGCAAAGCCTTGATACGATATAATACAAAAACAACT  
TTTTAATCATTTTGTATACTGGTTATATATTATAATCGTTTGTCTCGCCTAAATCGTATAAACGTTTACT  
TACGTATTGCGCTCGAGAGCCAATATTTTGTCAAGAGAGAAAACGAAACTCGTCCTTGTATGTAAAGCAC  
ACGTCCTTAAGACCAAGGTTCTCACGTAAGGCATCCGAAACCAATACGTCCGACCGTCCAAATGTGACTCT  
ATTTTATGGCATTCGATCACACATGAATATTGTATATGTATTTACCGAGGGTCTGCGTGTATATCATATC  
GTTGCAAATAGAACTGCGTGTATTTACGTACAAGAAAGCCGTATTGATATCACACAATGTGAATGTATAT  
ATTATTTAGTCATTTTCTAACATCTACCATTGTTGTTTGGGCGCGTTTTCAAAGGACTGCTCGAACAGTA  
GTTGCTAATATTTTCATTCAATATTTCTGAAGAACATTTTAATCCGCTGGGGAGCAAATCCCACATCAAT  
AGAACCGAATTCGTGTTTTTCTTTTTTCTGGGGGAAGGAGGGTAAATATTGAGAAAAGGCTAATTTTTGT  
CTACTTTCAAGAGTGGTCACCTGCACTAAGCTTTCTGTGTGTAACACAGCTCAAACAATGTTATTGTCA  
AATAGAAACGTTCTTTTTAATTTTCGATGCTATTAGTTTGGCGATAGCAGGCTATTCTTTGCGCTGTTGT  
GGAGGTTGGACCACAATTGGATTTCAAGAAAAATTAAGCACCGAAAAATAGACAGGACTACATATATGGA  
TGCATTGTATGCCATGTTCAAATCCCTTCGTAAATGTCTGTTTGTAAAGGAATATGTAATCCTGTTATAT  
ACAGATAAGCGAAAGAGACACGTAAGCAAAGTAAAGAAACGTACTATATCTCCAGCATGGTAAAGTTAG  
TCGAGATTTTTTAACGCCCTTTCTTACTGCGCGTGCTTCTATGAACCTTTATCATCAGTCATACGCGCCCA  
TGATGGTTTTCCAGCGAACACATTCTCAGTGCGCGGTTCTTCCAGTAGCTCGTGTCTCGTGCACCTCGTGC  
TGTACATGGAGGACTATGTCTAGATGGGCATTACACCATTGAAGGTGAGATTTTAACGAGATCTGTTTT  
ACGTGTAAACCAAGTTTTTGTTTTTATTGTATTACGAGAAATATTTAGTTTCGAGTAAAAAAAAGTCAA  
TGAATTTTCAATTGCAACACTTAGACATATTCTTATGTCACTAGTTTCTATATTAATAATTACACGCAC  
GTGCTATCGATCCTAAATGTTTGACCTCTCTTTAAGATTGAAACTGTTTCTCGTACACATTTAGAATTC  
ATTAAATCACACAAATATCACTTCATGACAGGAGTACCAGCACACTAAAATAACCGTTAATAAACCACT  
TGTCACCTTGGTCTATTGTGTTTATGTATATATAACAAATCAGAGAAAAATTATCTAACTTTCAAAGAGAA  
GTCCTTCCTACACGTGTTAAAGTACAGAATGTAAAATAGGCTAAAGTTTAAAAATTCAACTTTTCTTCGA  
GTTAAAGGGCTTTAGCAGGCAAAAGCAATATCAGACAGCACGTAACGAAGTACGAACAAGGTAGAGAAAT  
CTCAATACATATGCATAAGTATCAATAAATTTTTTTTTTCTTATGAAAGCACCTTAACGTGTCTATTTCT  
AGATAAAGTGGAAGCTGGTAAATGTTTATTTAAACACAATAGGCTGATCTAATAAGTGTTTACTTGCTTC  
TTTATTGCGCGTTTCTCTGAGTCAGTTTCTTCGTGCGTTGCTATGCTTAGCTTTCAACCTTGTATTCGAA  
TATATGTTATTGGCTTAAACATTGGAACACAATGTTTCGTCTTATGAAACAGCCAATAACCATTCGTGTA  
GTAAGCTTCTCCTTGATCAGTTTCTAATAAACCGATTACATTTGCTCACACGGATATCACAATTAAGT  
TTATGTTATAAGGTATGGTTTGTGTTTGAATTTGCGCAAAGCAACTCGAGGGCTATCTGCGCTAGC  
CGTCCCTAATTTAACAGTGTAAGACTAGAAGGAAGGCACCTAGTCATCACCACCTACCGCCAACCTTGG  
GCTACTCTTCTACCAACGAATAGTGGGATTGACCGTAACTTTATAACGCCCCCACAGCTGAAAGGGCAAG  
CATGTTTGGTGCACGGGGATTGCAACCCGCGACCTTCAGATTACGAGTCGAACGCCTCAACCTAATTGG  
CCATGCCGAGCATAAGGTATGGTTAATTCGTAACCAAGTGCCTTTTTTACTAAATTAACCAGGGAATGAAA

ATTTCATGATTAGTAATGGTTTACCTTTTTTTTTTTTTTTTTTTTATTATTAGTAGTATACGCTTTACGCGAGTCAAA  
 TTTGCTAAAAATCATTTTCATTAAACGTTACTGGTTCACTAATTATCGAAATTAAACAATTACGTTTTTCCA  
 TTAGCGCTTCAAAATGATATCATGTGATTTATATTAAGGTTAACAAAATTTAAAAGGCACTTGAGATTCA  
 CATCTCGTTTAAGTATTTGCTTAATATGTGCCCTATCTTGCTACCTGCACACCTACCCGACGTCTGAGA  
 TTCCTTAATTTTGATAGCATGTAATATTCAAATTCGGAGCTCAATCCCTGCAGTAGCACTGCGACAATA  
 GCTCATCATGCAACTTTACAGAAGAAAATAAGCGAACGAATCAAAAAACCACGAAACCATATACTGCTGT  
 ATACCATATATTCCCGACATCAGCAAAACAAATAACCAACATTTGGCAAAAATTAGTAACAAAATATGACA  
 TTCCAATTAATACCAAATTTATTCAAACCCGGCACAAAACCTGAGGTCTATACTATGTAAAACTACAC  
 TGACAAACACCACACCAACATTATTTATAAAATACAATGTNNNNNNNNNNNNNNNNNNNNNNNNNNNNNNNN  
 NNNNNNNNNNNNNNNNNNNNNNNNNNNNNNNNNNNNNNNNNNNNNNNNNNNNNNNNNNNNNNNNNNNNN  
 TGAAAGCACCTTAACGTGTCTATTTCTAGATAAAGTGGAAGCTGGTAAATGTTTATTTAAACACAATAGG  
 CTGATTTAATAAGTGTTTACTTGCTTCTTTATTGCGCGTTTCTCTGAGTCAGTTTCTTCGTGCGTTGTTA  
 TGCTTAGCTTTCAACCTTGTAATTCGAATATATGTTATTGGCTTAAACATTTCGGAACACAATGTTTCGTCTT  
 ATGAAACAGCCAATAACCATTCTGTTAGTAAGCTTCTCCTTGATCAGTTTCTAATAAACCGATTACAT  
 TTGCTCACACGGATATACAATTAAGTTTATGTTATAAGGTATGGTTTGTTTGTTTGAATTCGCGCAA  
 AGCTACTCGAGGGCTATCTGCGCTAGCCGTCCCTAATTTAAACAATGTAAGACTAGAAGGAAGGCACCTAG  
 TCATCACCACCTACCGCCAACTCTTGGGCTACTCTTCTACCAACGAATAGTGGGATTGACCGTCACTTTA  
 TAACGCCCCCACAGCTGAAAAGGGCAAGCATGTTTGGTGCGACGGGGATTTCGAATCCGCGACCCCTCAGATT  
 ACGAGTCGAACGTCTCAACCTAATTGGCCATGCCGAGCATAAGGTATGGTTAATTTCGTAACCAGTGCCTT  
 TTTTACTAAATTAACCAGGAAATGAAAATTTCAATTATTAGAATGGTTTGCTTTTTTTTTTTAATTAGTAG  
 TATACGCTTTACGCGAGTCAAATTTGCTAAAATCATTTTCATTAAACGTTATTGGTTCACTAATTATCGA  
 AATTAACAAATTACGTTTTCCATTAGCGCTTCAAATGATATCATGTGATTTATATTAAGGTTAACAAA  
 TTAAAAGGCACTTGAGATTACATCTCGTTTAAGTATTTGCTTAATATGTGCCCTATCTTGCTACCTTG  
 CACACCTACCAGACGTCTGAGATTCACTTAATTTTGATAGCATGTAATATTCAAATTCGGAACCTCAATCC  
 CTGCGAGTAGCACTGCGACAATAGCTCATCATGCAACTTTACAGAAGAAAATAAGCGAACGAAACAAACCA  
 AAATAATAGCTAATAGTTACATTGGTTAGAGTCTCTTAGAACTTTATAATTTACCTTTTTATTATTAAG  
 AATAGCCAGACTTTTTATTATGAATTTACATGTTAAAAACCCATCACAACTGAGTAGCTATAGGAATTC  
 TTAATAAAGTTTAATAGGCCTTGAACATGTTTATAAATCAGGTTAATACTACTTGAACATATAGTCCTCA  
 GTGGACAGAACGAAGTTCGCCATTGTATAGTTTTGCGTTAGGAAAAACACAACAACCTGACCATTTACGG  
 TCATTTTCCAAATACATGTCGGTACATTAATGATGAAATGACAGTGAATTATATTTTTCTTTTTTAAGTA  
 ATTAAAAAAGATGATCAGGAATAAATAAAAGTGAGTTTGTTTAAAAACTGTATAATAATACTAATGCCTG  
 CAAAATATTAATTTTAAAAATAATCATAACCAGTAAAATAAAACCGAACTCAATCATTATTATTTCTCTT  
 CACACAAACAATTATATTAAGAATCATTTCTTGTTTTTCAGAGATCAGAACTGTAATTATTGGCGCGT  
 TTAACATCACTTGTCCTTTTTTTTTTACAATCCGAAAACCTATATGATAAACTTTAAAAAAACGTTGATA  
 ACAGTCTTTCTTCTTAAAAGGACTATTTGTGGACATTTTTTTTTTCTGAGAGCAGAACCGTCTTATAGTG  
 CTCTTAACCAATGAAGAAGGATTCTGTGAATCAGTGTTCACTCTCAGGCTTCGCATGCAGTTAACACT  
 AAATATTTCTGAGCGTAATTACTTGCAACATTTAGTACCTTCCCAAACTATATTTAATTGTATTTGAAG  
 TTAAAGTAAAGATTTGATTTTAAAGGACTTTGTTATTTATTTTGATATCATTGAATAATGGGTACTAGA  
 GCTGACTAATTATCCTGATCCTTACATTTTTTGATGTTACAGACTTTTTGTGCGAGTATACATCCTTTCA  
 GTCTCTATATATTTTAAAAAAACAACAACCTTTGTTTGAATTTGCGCGAAAGCTGTTGTTGTTGTTGTT  
 TTTTTGAATTAAGAACTAAGCTACAGAATGGGTTATCTGCGCTTTGCCACCATCAAACCCCTGTTTTTA  
 GCGTTGTAAGTCCGCAACATACCGCTGAGCCACTGGTGGAAGTCTGCGCAATACTACAATAGGACTATCTG  
 CGTTAGACGTCTCTAGTTTAGCAGTGTAAGAGTAGATAGAAGGAAGGTAGTTAGTCATCACCAGCCACTG  
 CCAACTCTTGGGCTACTCTTTACCATTGAATAGTGGGATTGACCGATACATTATAATGCCACACAGAT  
 GAAAGGGCGAACATGTTTAGTGTGATGGGGTTTCGAACCTGCGACCCACAGATTGGGAGTCGAGCACCT  
 AACCACCTGGCCATGCTGGGCCCTTTTAAAAAGTAATAATACTTAGGATCTATGTCTGATATTTATGTTT  
 ATGTTATATTTATGTTTATATTTATTTTTATGTTTATGTTTATATTTATGTTTATATTTATGTTTAT  
 GTTATATTTATGTTTATGTAATACTTATGTTTATGTTTATATTTATGTTTATGTAATACTTATGTTTATGT  
 TATATTTATTTCACTTAGTTAAGTTTCAGTGATCTGAAACGATTTGAGCTAATCTCATTTTCTTCTTG

GGACTGAGAGTCACCTAGTGGTTAGCGTGAATCTTTGGGTCAATAGTTCGAGTTCGGTTCCTGCAACATT  
GCACCTTCTGACGTTGGGAATGTAGGTTTTGTTATAAGAGTGACAGTAAAAATCCAACGATTTGATTAGCT  
GTCTTTCCCTTCAGTTCATAAATTCACAATTAGGAATACCTAGCACAGATTGCCCTTCTGTAGCTTCTCAC  
AAATATCTAAGAGAAACATTTTCTGAGTCATACAAAAACAACAGAAACATATCCTTTTCTACTAAGTAA  
TCTCTGAGTTGTTGAATTAGAACAGTAAAATGTGAGATCCGATTCCCCGCGATAAACGGAATGCTAATGG  
ATTATTGTGTAGCTTTACGCTGAAACAAAGAACGCCCTAACAAAGTAAATCATCAAACTTTTGAAAGAAG  
TCATGAGTTATATTTTTCAGTATCTGAAAAAGCATGACAAACTTTTCCATAACAGTTTATATTTTATGAA  
ACTACGTGTTTTAGTTGTTAGGTTTAATCTTCATTTAAATAATTCAACATAATATTTTTTGTGGTTCTAAA  
TCCTTAACACTAAGTTGGTTGTATCTTAACATTTTTTCAATAAATTGAATAATAATTATTCTTAAAAATGCA  
AATAACAAGTTTCATTGAACATGAGTTAAAAACATTTTTTGTGTGAGTGTGTGTGTGTGTGTGTGTGAAACATTT  
TAGTCGACTTTTACTTGTTCGTTGTGAAAAAATACTTGTAAATATAGATGATTGTTAAGAGTACATTTT  
GTTGAACTAGCTTTTTCATGAGTTCCTGGTGTCTTAATTATTTTCTATTAAAAGTAACGTATTTTCAAGAA  
CTTTATTTCATTTATATACTTTAGGCTAATTTTTTGTATTATTAATTTGTTTGCCTCAAAGATAAGGTCT  
TGGGTAAATATTCAGCTTTCGTGGACATATCATTGGCATCAGCTCAAAGTATTATACAGAAACAATAATT  
TAGCAGTTATGAATGTATGTCAGTCAAACGTTATTTTATAACAAATGCGTCAGACATAATTATTACATAT  
TACGGTTTATTGCCCTTTTAAAGAGAAATATAATTAATTGATAACACAAATAATTATGAATTGTGTTAAAG  
ATTTTCGACTTGTTTAACTTCAACAGTTCAGTTTTATTGTGTTTCCGAAATGTCTTCCAGAGCTGAATTA  
TGTAAGTAAATATAAAGAGAGAGAAGGGTAAATGGAAGGTAAAACGAAACTATATTTTATGATATTGTT  
TAGCCTTTTGGTAAATTAACAGAAAGCCCCCTGTAGATTATGTTAAAGTATTTAATCCTTATGGTTAGTTG  
TCACAAAACTGCTAGAAGCAACTTACGTTTGGGGCTTGACGTGCGAGACTAAAAAATTCTTGCAGAGAA  
GATTAGGCCTACATATATATGACCCATAACATGCGAATGGACAAGAAAGCTTTCTATTGGCTGTACATTA  
AGTACATATAACTGACGCCCTTTGTGCGTGTCTGCACTTTTTTAGATTTTGACCCGTTGCTCCCCGGCCCA  
CTTCGCCAGTCTGCTGTCTCAGATCCAGGTTAGTTCGATAATGACATTTTCTTTTACATATTTTGGGAT  
TGTAATAATATTAAACAATATTTTGTACTCAAATGAAAATATTTACAGACTGGTTTATCTTCTTTTTTTT  
ATTATTACGTCTAAGAGATAACGTGTTTTTTCAGAACGAAAATGACAGCCACGTAGATTAGACGCAGCTTC  
ACAAGTAGGCCTAAACAGTAATTCACACGTAACACAAGTGGTATCTCGTGTATTGTTTATTTATTTCTA  
AAATCACATGATTTTGAATGTGTTAATTTATAACGATTTGAATGATATCCGATTATTTGGGAATTTAC  
TTAACGATTTTATCTTCATTTGAAAGGATTGAATATTGTAGACATGTTTTCCGAATAAACCCACAAGGTC  
TGAAATGCTAGTTATGGCCATAAAGGTCTAACACTAAGAAAATTGCCAAAGTACAATATAATAAGTTTTTC  
AAAACATATTCGGATAACATTTTTAAAGGTGACTTTGGCTTTGATAACATAATTTTTTATAAGAGATTAAC  
TGGCAGTGTAATAGTTCTTTATATTCGTGTGTAACTAAGTTTTAGCGAAGTAATTTTCTCAAATTTTTT  
TCGGGAACATATACTTTTCTTCAGTATATGAGAGCTAAGTTTCATTAATAATCTTCTTTTGATGAAC  
GTTTCAGTGTTTACATACAATAAGGCTTTTATTTTTTCTAGTTTTAGCATTAAATCAGTGAATGAATATCAA  
ACCAACTACACTCAAAGTCTTTTTTTTTGGGGGGAGTAAACGAGTACAATTAAAGGATGAATTATCATGA  
ACAAGTTATTTTGACAAGTGGACAATATAGGACTTCAGCCAGTGATAAAGATTCCTTAACTTATTATAAAC  
ATAAATGTCCTTCTCTCCATGTATTTTTTATTTTTTATTTTACAAATTGGCCAAACAATTAAATTCACAA  
AGTTCAGTTACTTAAAGAGTGTAGTGTATTTGATGTAATGCTACGTACATTGTCCCGGCATGTCCCCACG  
TAAATTAGACGCAGCTTCACAAGTAGGCCCAAAATTGTAATTAATACGTAACACAAGTGGTATCTCGTGT  
TATTGTTTTATTTATTTCTAAATTCACATGCTTTTGAAATGTGTTAATTCATAACGATTTGAATAATCCG  
AGGGTCGAGGGTTCGAATCCTGCTCGCACCAACATGCTCGCCCTTTCAGCCGTGGGGGCGTTTTAATGT  
GATGTTCAATCTCACTATTCGTTGGTAAAAGAGTAGCGCAAGAGTTGGCGGTGGGTGGTGATGACTAGCT  
GCCTTCCCTCTAGTCTTACACTACTAAATTAGGGACGGCTAGCATAGATAGCCCTCCAGTAGCTTTGCGCG  
AAATTCAAAACAAAACCACTGTATTTTTTTTTTATTACAGTCTTGCTGCCTCAGCACTAAGTGCAATAA  
AAAGGTCACATGAGTTTGTATTGATTCCATAGGAGTCGTGATACTGTATTTGATTTAATGTTCCATTTT  
TTGTACCAGTTTTGTACGTTAACAGTGTAAGAAAGGATACAACAAGAGCTTGTGTTGACACTTGTGCTC  
TAAACAAACGAGCAGAAAAATTAGGTTAAAAACAAAATATTTTATTAATCCTGTTTAAATCAATTTACA  
CACAGAAAAAGAGATTTTTCCACCATGAGCAAAATATTAGCTTTTTAGGTTTTAAATTTGTGAATTAAGTGT  
TTCTGGGTTTTTTAAATGGAATCCCGCTAGCTATTTAAACGCTCCCCCAACCTCAAATACGTAACAAAA  
ATATCCTAAATATTGCTATTAACTGTTAATTTAACATTAAAAATGAGTAATATCATTCTTCTAATACAT

TTCAACATCGGTTGATACGACCGTTGTAACAGACAAAAACATACAATTGCTTAATATACTGCTACATGTG  
GACACTATATATTGAACAATACACGTACATAACAAGTCAGCTTTTAGGTTTAACGTTACTTATAACAGAA  
ATGTTTATATAATTTTATGATATACGAAACAAAACGTGAACGAAGGTCCTAAAATTTTAAACACTGTTTA  
TCAGAAATTTTCGCTTTTACATCAGTTTCAAGGTTTTTCATAAGCTAACTGTAACCTATTGTGCACATTGT  
TCGTATATGTTGTGCGTGTGTGTGTAAGTCTGTAAGCTAACTGTAACCTATTGTGCACATTGT  
CGTCATACGGTCATCAGAATTTGTTAGCCAATTCTCGGCGTTTTTCTCAAATTACATTAACACAACAAAG  
TAATTACATCGAATAGGACACGTTTTAGAGTGTTATTGTTTGAATCACATGTTACAGACTTGGTGAAAGT  
TTTCCAGGCGTTAATAGCCAGTAACGTATAATTTCCCAACCTACTATACCTATGGTTACTGTCTGCTCA  
ACTAAGTTTGAAAACAAATTAGGGGAATATTTATGAAGTTGGCAGAAAAATATATGATATGATTAATTGTA  
AATAATAATGTGATTTATATCAGTGCTTAGCAGAAGGAAAGTGTAGAAGTGCGAGGGGATTTGTTTGTGG  
GAGTCGGATGAGGCCAGCAAGTAGAAAAAAGTCCAGTCAGAAATGATGGTCCCTCGAATATTTCT  
TGAATATCTATTGTTAGAAATGACGGCATAACTAGAAGTATCACCTTTGTAACAACAATTGTACGACGC  
GCCGGGAACTTTCACGCGCTGTTCCGTCGCTGGCTACACGTGTTTATGTGCCGCCATATTCAACCTGA  
AGCGAGCGCTGTTTCGCGGCACTTTCCATTGTTTACAACAGCGGCTTTCTCAAACCAATTTTAATCTA  
TCTTTAGCATTGACAGAAGATATCTTTATTGAATCGTTTTACCCCTCCTCAATGAACCTTTGTGATGTTTT  
AGGTCGTTGTTAATTGGTTCTAAGATTATCGCTTTTATTAATTCTTTCTGAAGCGAAGTTGCCCTCATAG  
GAATCGGCGTTTCGTTACGCTCATGATTGAGAGACCCGCTTTATTGGATTTACCGTGAGTGGCCTATTA  
TTAACTACTATAAAAACAAAATATTTTCACTAGCATTTTTCAACCTAACAGAACTATATGGAGTA  
TAGAATTTTAAATCTTTTCAACATATTTATATCTAAAAACACACACAAACGTTTTAAAAATTATTA  
AAATAGTTTTGATCGAGTTCTCTAATTCTGACGATTTTTGTGTGCAAAGAAATTATTAATTTATGAAAC  
TAATATTTATCGGGTTTCTATTCTGTAAAGTTAATGTTTGATCTGCTCAATTTATATTAGAGATTTT  
ATTATTCGCTTTCTGTTATTTTCTTTTATTACTGTTTCGAGATTATTATTTTTTATCTTAACATCTAGAA  
ATCGTTCAAGTTGCTAAGGTTTGAAGTATCACTTAGTTACTACCCTTGATGTTGCTAAATAAACCTGAA  
TTTATAATACCATCTAATACATATAATACGTATCAAACCTACTTTGTATTTTAGATTATTGAGTAGGAT  
GTTAAACATTGAGCTTTATTAATACATGTTCCATAAAAAATATAGTTTGTTAAGTATTAAGTTTTATGAAT  
TGTGAATTAATATTCCTAGTTTTTTTTTAAATTGAATCCTGCTGGCTTTTTTAACGTGCTTTTTTTTTTC  
TGAACAATTTATGCGCTATTTTCTTGTAGATTACGACTTTGTTGGTACATTGTCCCTAATTACATACG  
AGACAACCCCTAAATATGTAAGAAAAATGTCCTAAATATTGCTAGTAAATCCATTAATTACTGTTAATTTA  
ACGTTAAAAATGAACAGTTTTTATAACGTGTAATGACACATTTGCCACAACTAAAAAATGTCGTTAAT  
TCGTAACTATCTCCAAATGAACTTTTTTATCAATGCAAAATTAACCTTTACTTCAGGGCTGATCATT  
AATTATGTTAAATACTACTTATCATAACGTTGAACGTGAGAATTTGTTGTAACAATTTATGCCTTGTTAT  
GTTACGCACTTAACGTGGTGACTAATGGTGTACCTAGTCTTCCGGCAGCTCCAAGTTTCCATGTGTGT  
TATGAATCATCATTTGGAGACGGAATTTCTCTTTGTTACTCTGAAGACGAAACTGTGTATGTACAGA  
AGGGCTGATAGATCTGTCTGAGTGTATATTTGAGTGTGTGTGTGTATGGATTATCTGGTCTCTTC  
TTTTATAAAAAATGTAGACAGGCGATATTATTTAACTCATCGAATGCTAATACTCGATTACCTTTCTA  
AGAAAATAATATTATGTATACAATACATGCTAGTTTTTGATAGGAATTCAATCGTTATGTAGAAACAA  
GAATCATTACGTAAAAACGCGCAACGTTCTTACAATAAACAGAAATAAACTTTTCATGTATTATTTGTTATG  
TTTATATTAATAAAAAAGAGGTCGCTATCAAGATACGTATTGCTAGTAAAAACACAACCTATCAATTATTT  
ATGACACAAAAATCTAACTTGTATATTGAGTTACATGAAGTAAAAATGCTATACTCCCATCTCCAGTG  
AGTCAGCGGTAAATTAACAAAAAACAACCTTAATAGGCTTAAATAATTATGTTTGTATACCCGTTGGCGGA  
CGATATTCTAGCCTTCCACTAAAAACAAATAAACAATCAGATAGGAATACAGTAAATTGGTTGAAACAGTT  
GTTAGTTAACTGAATGTTATCATATAATGCTGAAATGTATAAACATATATAGAAAAAGCAAAATAAAC  
AGTAATTTTCGTTGATGTTCTAAACGAAACGTTATGTTTTTTATTAAGATGTTTACATTTGTATTAGAAC  
ACTTTAATTCTCCCTTTCTTGAAGAAAGATCTTTGTATATTTACCTATGAATATGACATAAAATCTGTG  
AAGATATTTGAACTTATCCGATATTCTGATAGTCCAAGGGCTTCTGACTCATTTACTATACCTTGTATGT  
CTCAATGCTTGTCTCTTTCTAACAATAAACTACCATATCACACCACACATTGCCAAATTACACTTCTA  
AGAGAACCGTGTGTGTTAAAGGTTAGAGTTCTAACAAGATATGTGTCTACAGGTTAGAGTCTAGCAA  
GGGTGTGTGTTTACAGACTTTTGTCTGACAAGTTCCGTGTTTACAGTTTATACTTCTAACCGGAGTGT  
GTATGTTAAAGATAAGGGGCCCTTCCAGGGGTGCATGTGTACTTAGAATATTTATTACTGATATATAA

AAAAGTACTTTAATTAATATATTTTTCTCCAAATTACTTGTACTTCCTTTATCCAGGGCCCGGCATGGCCA  
GGTGGGTAAAGGCAAGGCGTTCGACTCATAATCCGAGGGTCGCGGGTTCGAATCCCGGTCGCTCCAAAAA  
TACCGGGGAGGCGTCACAATGTGACGGTCAATCCAACATTTCGTTGGTAAAAGAGTAGCCCAAAAGTTGG  
TGGTGGATGGTGATGACTTGCTGTCTTCTCTCTAATCTTACGCTTGACATTAGGGACGACTAACGCAGA  
TAGTCCTCGTGATAGCTTTGCGCAAAATCCAAAAAAACACACAAATTTCTTGATCATTTTATATCAACG  
TTCCCTGCAACACAAGATGTGTACTAAAGGACACTGTTGGGAAATCAGTTATATGCAAATACTTTAAGAA  
AAATCTTTAAATATATGTTATTTTATTGTATAATGTTTGATACACGTATATGAGTTAAATGTTATTTT  
ATTGTATAGTATTTGATTCACGTATATGAGTTAAATGTTATTTTATTGCATAGTATTTGATACATGTAT  
ATGAGTTAAATGTTATTTTATTGCATAGTATTTGATACAAGTATATGAGTTAAATGTTATTTTATTGCA  
TAGTATTTGATACACGTATATGAGTTAAATGTTGTTTTATTATATTCAGCTGTCAACTACAGTAACGTG  
GTAGTTTTTTGTTTCTTTTCGAAACATCTATCAGAATATTATGTAAACAAAATTGTTTACAGAAGGCTGTAG  
GGAAGCAACAGATAAAAAAAATTACACCATCATCACAACCAGTATTATGGTAATGAAATTGATGAAGCA  
GACGATTTGTTATTTACTATAATACGAACAAAATATAACAAATAACTTCAAGGAAATTCAAACTGATTC  
TTTTTTATCCAACTTCATTTTTACTCTCTTTTTTAACATAATAAACATTAAACAATAAAAAATACATAAAG  
GTACCAATTATGAAAAGAAAAACAACAAAACGTAAGTGTGTGTTTTCTTATAGCAAAGCCACATCGGGCT  
ATCTGCTGGGCTCACCGAGGGGAATCGAACCTTGATTTTAGCGTTGTAAGTCCGTCGCTTACCGCTGT  
ACCAGCCGGTGGCAAAACGTAAGTCTTTTTCAAGAATTCTATTAATATGAAATTAGATGAGGGGTCCAACTC  
CCTCATGACTTTCTTATGCCATCTTGTGTCACTGTATCAAGTCTGTTGCTGATTGATCGAGAAATGTAG  
AAACGTATAAGGAACAGGTACACATCCGTATAGTCCCCCTTCATTTTACTTCATATAATATATTAAGT  
AGTTTATAACCTTAAACTGCATTTAAAGGGTATAATAGTAAATAAATAATTATTAAATCAGACATTATCA  
CATACATCTGATATAGTATTTTATTTTACACTTCACATGTAGCTAATATTTTGCTGATTACATTAA  
TTGTAATTAAAGTGAGGAATTTGATTAACGGACAGAATCTGGTTTTTGTAAGATGTATGAAACTTCATTT  
ACGACACAAAGTTGACAACATTAGTATTTATAGGCCTGGGTGTGAGACGAGAGTCTTTTCGTTGTTACTT  
TAACTCCTAACACGTAAGTAAACATTGAAAATTAACAGCACTAGGCTTAATTTATTTTAAACACAACTTG  
TTGCAACTTAGCTTTATTAACCGTTTCTCAATTTTCCCTATTAGCGGTTTAGTAAATGTTAAAAAAGA  
GAAAGAAATGATTATATTTCTCTTAATGGGAGTTCCATTCTTTTTGTTTACAAAGGAAGGTTAGGTT  
AATGTTATTTTTATCTTTGTTCCAGTTATACCAGATAAACAGGTTTTTTTTAGTTGTAATAGGTTATACA  
GTTTGCTACTAGTTTAGGCGGATTTATACTTTTTATTGTCTGTTTTGAATTTCCACAAAGCTGCACGAGA  
GCTATCTGTGCTAGCCGACCTAATTTAGCAGTGTAAGACTAGAGGGAAGATAGCTAGTCATCACCACCC  
ACCACCACTCTTGGGGTACTCTTTTTACCAACGAATAGTGGGATTAACCTAACCTTTATAACGCCCCACG  
ACTAAAAGGGTGAACGTGTTTGGTGGGACGAGGACTCGAGCTACCCTCAGGTTTCGAGTCAAGTGCCCTA  
ACCATCTGGCTATGCCGGGCCAATTATATATATTTATATTTATAATAAACTGTTAAGTCTAATGTGTTT  
TAACTTAATTGGCAAAAATATATTTACTTAACTCAGAAAACACACAACAAATCAGTATACTGAAACGT  
AAATCTCTGTTACTCTACGTGTTACACGATAATAATACATGACTACCTCTTTTACACCAGGTATGGTGT  
TCTATGCTCTGTTACGTGACTTTAACTCTTTCCTACTGCTGTTACGCGAGGCTAACATTTTCTACCTCA  
ATTACTCATGAATAATTCTTCCTTTCCTCTGATACAAAATGTTAGACCTTCCCAAACCGCGTTACACAA  
GATTAACCTTCTATACCTGTGCTACTGTTTCCAACCTTTGTTCAAGGTTAACCTTTCCTACTTTTATTA  
CGTGAGATTAACCTCTATCTCCTTCACGTGTGGTTTAAACCTTTTCTATCTCTTTTAAACCTTACGTACCT  
CTGTTACAAGGTTAACTCTTCTCTGGTTGTGTTAACAAGTATTAAAATTAAATGTTAAGACTGTTTCGTT  
TACTTCTGTTTTTGATAAATCAGATAGTCGTTAATAATAGTTCTGGAAGATGAACATAACAGTTCAGTCA  
TTACTACTATATATTAATTTCTCATCGGAGAACATTTTACTGACTTGGCTTTGAAATGTTGGTTCTAGAA  
AGCTTCTGTGAACCAAGCATGTGATCACTTGATCCATATTTTCAAGTTCGATTTTTTTTTCTATCTTTA  
TATATCTATTTTAGTTACTAACTTCAATAATATGACGAAATCAAATTGATCGTAAGGAACACTCACGTG  
AATACTGTCTGTTAGACTTTCACCTTTTATAATTGATAGAGTTCTGAAGCCCAAACAGAAATCATAAACC  
CGATTAAAACACTAATTAATATTTTAGCATCCTAATTAAGTATAAATATTTTGTTAATATAAACATCA  
TACACATTATGTATCATAACAATAACACATTTTAGATTCCCCAGTGAGGTTTCGACTCCTTGCGATGAAT  
AGGGTGCAGACCAGTCCATTATGTAACCTTGCAGTAGGAAAATAACAGCTGTAATATTGAAGGTTTTTAG  
AGATCAAATTGTGACCTGTTTGAGTCATTTGGCATGCTGCTTTAGTTTGTAAGAAACAAGTTCGCGTGAA  
GGAAACAAATATAAAGATGTACATGTGCTGTAGAATGATATTGGTATCGGGTATAATTGAGTGTGATATC

TTGTACTATACATGAATGATTGTGGTATGTTGCATAGATGGAATGTTATAGGTATAGGATATGACTGAGT  
GTGATATGTAAACATGTCATTGAGTGTGGTATATTATATACACGGAATGTTATAGATACGGTGTATGAT  
TCGAATCCGTTGAATAGTAAATGTGACGTCGCTTCCTTAAAGCTATGTTTTATTGGCAAAAAAGAAACAA  
ACAGTATACTAGAAGAAAGAAAGAAAGTCTGATATATCTCGTCTCTGACAGGGTTGATGGCTTCTAAG  
AATCAAATACATTTTCAGAAAAGCGAAGGAACGTAAGGTCGGATCTGAGGTTGAGCTGACGGTTCATGGG  
AGAAACGTGCTACCTATCGATCCAACGCTGACATTAGTCAGGAGTGGAATTTATATTGTGACTTGAACAT  
GGTAACAACGACGCCCTGTAGAACTTCTATAATTGATAATTTATCATACTACACTTTTGAAATGAATAC  
AGTGATAAGACAAGTTAGGAATAATAATAATAAACATTAGTAGAGACTTTATCAGTTGCGTGCAGTTGT  
GAAAACGTGTTTGTAGCCAGCACCTTAAACCTTTGTGATAAAGTACTTGGTTTATAAATGAAATGTTATT  
TAGTTACTAATAATAAATCCCGTAAAAAATGAAAGGAAACCAAACCTAACAAATTTAAATCCTTCAGCG  
TGCATTTATAGCTTTCCAGCATGTAAACGAACGTGAGAAAAATAAAGGGCCTTATAGCTTGAGAAAACCA  
AATTCGTGTTATGAGAAATGTATATTTTACATACTGAGTGTCTCTTCCAGCATTCACTAGTCACATTAGT  
TGCAACAGTTTTCTTAAAGCGCATTTCTTCTAAATACTCGCTCATTTTTTCAAAAACCTTCTCTCGTAAC  
AAACGACAAATTAATTTAGTCGATACCAAATAAATCATTGCTATAGAAACTCCCTTGACAGACTTTTAT  
ACAACAGAAAGAGAGCCGAAACGTAAGAGCTATTTACTCCTACGTTAGCGATTGAATTTAACTAAAAATTG  
AACGGACAACAAAAATAGGAAGTGTTATAGGAAAAGGTAGAACTAGGCTTTGTAAATAACTAAAGTTGGA  
GAAATCCAGCGTAATCGACTGACTAACTGACCGACATTTGGCTTTTATGATTATGATTTTTTCTCTCTG  
TTATACACTGTAGATGGTTTATTTCAATATTTATTTGTTGTTGTTTAAAGGCGAGACCACTAAGACTATCC  
GTTACTATCCTTCATTTTTGAAATATCAACTAAAGAAAGGGAGGCAGCCAGTTAGCAGCATCCTGCTACC  
CATCGTCAACGTTGAAGGATTGGCTGTCACTCTTATGACGCGCTCATACCTGAAAGTATTGTGGTATCAC  
AAGGTTCCAGAACCTGCCACTGTTTATATATTTTCAAGTTTGTGTTAGCTTTCTGATTGAAACGAATGTTTCG  
TGTCATGTTGTTTATAAATATTTTGTATAAATAGAAAACCTGTTTATTTGCGAAAACGAACTTTAAAAA  
AGGAAGATATGAACTTCGTTGTTCTACTTTACGTTTAAATGCATACAACGTTTAAAGCCTTCCAGTTAAGA  
TAGGTTATCCTGAAAAAAATGAGAGAATATAATATTGACCTTCCTAAAGGTCAGTAAACATTTGATAA  
TCTCATCAATGAAGCTCAGAGGTTGTGATTTTTTTTTTATAAAAACGTCCTAAGTACTGATCAACCCACCC  
TAGTGAGTAGATTCTTCAGTTTAAATTGCACACATAACACTGTTCTCTGATTTTTTACAGTTATACTTTTC  
ATGTTGGAAAACGTTTCAAGGGTGAGAGAACATGAATCTTGTTGCTAACGTCCCCATTTCAAGTGCTGGT  
ATATAAATAGGGTAACGTATTCTGATTTACACAAATAGTATGTATTCTAAATATTCCACGAGGGTTTGA  
GTAACGGGGAAACCCCTTGAATTACATATACTAGAGGTTTACTGCAGCTGAATTATATCTTACACGTTTGT  
TTGTTTTTAAACAGTGTAAGGTTTTCGGTCATTTACGAAGATTAGGAAGCCAGAGATCTCCTCGCTATACAA  
TGTGTAAATATTGTATTTGTAAAACACCTGAGTTGAAATAGGCAACACAGTCGTAATTCCTCATATGGTT  
TAGGTTTTGATACTGACACGAAAACGTACAAATATGTCGCTTTCAATTTTTTGTATACGCAGATTAAAT  
TAATAGGCTTACCAGTAGTCTACATGTCTGTACCCCTCCCCACAGAAAGGTATCTCCCTATATATACA  
TAGAAAAATATCCATATATATTTGTATTCTCACTTAGGGGTTCTATGATTTTTTTTTATATACACAAAAA  
TCTATATACATAGATACACAAATATCAATACATGTAAATTTATATATTTTTGTTTGTGTTTTAAGTAGGG  
TATCGTGTACTTTTGTAAATGAAAAGAGTCGATATCTACTCTTATTCAAGCATGTTAATAACACCATAGA  
AACAGAAGACAGAAGCAAAAACACAGTTTATTGTGCGTCATCATCTTCTGTATATTAGCTTCTGTACATT  
AAAATACTAATTTTTTTTCATTTTTACAAAAATACATATGTTATCGTTTTTTTACGTTAACCATTTTCATGTA  
CAGTTACTGAATAAACATGTTTCGGACGAAACGTTTACATCATAAACAGTTGTTTGTATTTCAGAGTGCTAGA  
GATAAAGAAATCTGTGAGTTGTTTGTATACTGTATTCTATAGACTATGAAATATCGTGTAACATAAATAT  
GATATGTTAATAACAAGCAGAAATGTTACCAAAAATGGCACGAGACAAGTAAGAATTGCTAAGTTCTATA  
ATAATAATAAGTTTGATTGACACTTCCTGTATAAACCCAGCTCATAACACAAGTGTTTTGTAAAATCAAT  
GATACTCTTCTGATGAATAATTTCTCATTGTTTACAAGTTCTGTGCTTTATGGATGGAATAACCTATGAG  
AGATAGGGTGATCGACTCACAAGCTACGAATCACGGGTTCTGAATCCTCTCATCGAACATGCTTGCCTTTT  
CAAGTGTGGTGGCGTTATAATGCAAGGGCTATTCCCAATATTCTGAAGTTAAAGAGTTGTTCAAGAGTTAC  
CGCTTGGGGGGTTAACTAGTTTCTTCCCTCCACTCTACTTGCTTCATAATTAGGGAGAGCTAGCGCAGA  
TAGCCCTCGCGTACTTTGCGCGAAATTCGAAAAAGGAACAAAGCTTTATGTGTATTAGCCCATATGTATA  
TTTAAAAAACACATTTGGTTTATTAGAAACATTTTAAACCAGAATTTTGAATAACTTTAAATAAAAGTT  
TCCAGACTATTTTGAACGTGAAGAATTTTCAATATAAATGGGTAAAATATATACAAATGTACCATGTATA

CTACCATTATTTGACTTAATGAATTCTCACATGTGATGTCATTGTACAAC TATTTTGTGAAAAATACAAA  
TTTCACACAAGCAGCTAGTACTTATGTCTAACTTTATTTCTACACAATAGTGATGTAAGATATATGTATA  
TCAGTATAACATTAAGCTGAAACATGAGCTCAAAAGTTTGTGTTTGGATTTCGGGCAAAGCTACAC  
GAGGGCTATCTGTGCTACCTGTCCCTAATTTAGCAGTGGAATTACGAGCCTTAACCACCTGACCAAGCCG  
AGCCAAGCTCAAGAGTAAATGCTAGTTGTCTTTGTAACACCAGAACTTTCTCTCTATACATATAAAATCT  
GAATGATGAACATAAGTACATTGTACACAATAACTAGAAGATAATAAAATAACGTAATGTCATTCACTTC  
CTAGATCAATTTCTCTTATTTAAACAGACATAATTGTTTGTGTTTGAACAAATAAAAAACGGTCCGG  
CACGGCCAGGTATTTAAGGCGTTAGACTCATAATCTGAGGGTTGCAGGTTCGAATTTCCCGTCGCACCAA  
ACATGCCCTTTTAGCCGTGGGGGCGTTATAATGTGACGGTCAATCCCCTATTCGTGTGCTCTGCATACT  
GCGGATATCGAAACCCGATTTGTAGCATTATAAGTCTCTAAGACCGTTGCAACATTGATCTGAAGCGCG  
AATGATAAGCCATTTTACTTTTCAATTCGTAAATGAGCACGTGGTGAAGGAGTTAGCTTTAAACCTTTGTAT  
TTCAAGACGTTCTGCTTCAAACGTGGAGGATGGTCACTACGTATAGCAAGGCAGCTTAGAGCTAATGCTG  
TCTGCTTAAACCACTGTATAGCCAGTAAACAATGGAACAAGTCGCTTTGTGCAGAATTCAAAACAAA  
CAAACAGATAAAATATATTTGTGAAGTATTCGTGTGAGGATGCAGCAATATAGTCTCAAACCTGGCTAT  
GTCTGAGCCTGAGGTATCCTCGAACACCATTCGTAAAGAGGTGTTTCTAAATGTCGTTTGTGACTGGAT  
TCACTTGACGGGATGTGGTCCATCTCCCAAGGATACCTTACATACTTGATGGATTGAACCTTCTACTAGTA  
TGCATACAACCTCTTGGGTCGATCCCATCTTCTTTAAAGAATCTGTTCAACAGTTTAGCAAGGAGGATGC  
AAGAATTTTATCCCTTAGGCTGCAGTTAGGGCTATTTACGCCAGCATATGGCAATACAGAAGATCTAAA  
GATATGGTTCGTATAGCATGAGTACCATTCCACAGGATCTAGATATTGGGATGTTCCCGGATTTATATTA  
TTTTCGTTAGCGTACTTGCCAGTATCATGTCTGTAACGTTAATTATCTTCGTGACATTAATTTTCAGGAC  
GTTTCCTTGGCACAATTACGCCTGAACAGTTTCTTGTTGTTTTTGCCTCGTAAGAAAAATCCATTTCT  
TTGGGTGTTTTGTATACAGGCGAGCTAGTGGAGTCTTTTTTTTTTAGCTCTCTGTACACTACGTGATGTC  
GAATCACGACTGCGAATATTTGATGCAGTCTCTGTGTAGGTATTACTTATTTTCGATAAATCAGAATAAA  
AAGACAACGAGCATTTTATTGTATTGTAAATGACAGTCTTCTATGTTTCAGACTCCTGATCAACTGTTCTG  
CTGGTTGTGAAATGTTTCAACTTTCCATATGAGTGAAACATCCTAGTTATTTGCTTGAGACCTTTAAA  
CGCTGTAATCCAATTCAAATTAACAATTTAGACAAGACTTTATAAAATCTCTGCATGTATATATACATAT  
ATACGCGAATATCTCTCTTCCCCACTACTACAGCGGTATGTCTACGGATTTACAACGCTAAAAATAGGG  
CTTCGATTTCCCTTGGTGGGCTCAGCAGATAGCCCGATGTGGCTTTGCTATAAGAAAACACACACACACA  
CACAGAAGAGGTTGAATGATTAATTATTTGCACTTCAGACCACATGATTGATTATAAGATGCTTAATTTA  
AGTAACAGTGAATAAAGAGCGGATGGTGGTTCTCACTATTTAAAAATGGATAGACCTTATCATAGATGTA  
ATATTACAAATTCAGATTACTTTTAACTGTTTTATGTAGTCCATATTATTAGTCGCTGACGAGACCGGT  
ATTCCAACTTTTATTATCTTCTTGTGCGAAGTAACATTAACACAAAAACATTGCCACTTTGATAGTTTAA  
TTGTGTTGTTACTTTACATCACATAAAATGATTAAATATAAACAATTTAATATATACTTAGTACCTACTT  
CACGTAAGCTTCGAATTACGAATATACACGAACACTTAAGCATTGGCATTATTTACATTAACCACTGTTT  
ATTTCCGGTATTATGTTAGAGGGCACTCTTATTTATTTGTCTATATTCCTTGAAACAATACAGCTATATG  
TGTGTTTTATTTATTTATCTATATTCCTTGAAACAGTACAGCTATATGTGTGTTTTATTTATTTATCTAT  
ATTCCTTGAAACAGTACAGCTATATGTGTGTTCTTTTATTTATTTATCTATATTCCTTGAAACACTACAG  
CTATATGTGTGTTTTATTTATTTATTTATATTCTCGAAACAATACAGCTATATGTGTGTTTTATTTATT  
TATCTATATTCCTTGAAACAGTACAGCTATATGTGTGTTTTATTTATTTATCTATATTCCTTGAAACAGT  
AGAGCTATATGTGTGTTCTTTTATTTATTTATCTATATTCCTTGAAACACTACAGCTATATGTGTGTTTT  
ATTTATTTATCTATATTCCTCGAAACAATACAGCTATATGTGTGTTTTATTTATTTATCTATATTCCTTG  
AAACAGTACAGCTAAGTGTGTGGTTTATTTATTTATCTATCTATATATTCCTTGAAACAGTGAACCTATG  
TATGTGTGCTTTTATTTATTTACCTAAAGACGCTTATTTTCAAAGCAAAATATGAATTTAAATAGTCC  
AGATTAGTGTTGAAATGTTGGTATGTATGTATGTGTGTGTAATTAATTAATAGTTTGAAGGTGTT  
TTCATTACTAGACATAAACATGCAGTAATAATAAACATAAATAGACATAAACATGCAGACACAAA  
CTTCAAAGTTGAATAAAATATGTTCTGTTCTGAAATAATGTTCTGCATTTCTCTTGAGACTCGAATCTGTTA  
CGCATGTGCCCTTATATAAACCTTATTTCTTACAATAACGAATAATCTTACTATAAATATGGTCCATTATA  
TATATGTCTGTGTTAACATCCATCATTCAAAGTTTGTGGCTCAAATACTATAATTATTCCTATGTTATC  
TGAAACCTATCGAACGTTGTACATAAGTTTCAGGACTTAAGAAAGGGACAGAAACATCCTGAAATAGGGT

CATTTTCCACTTTATTATATAAACTTTTGACTTTTAATTTAAAAAAGACACGAGTAATTAATAAGTTAAATT  
AGTCACTTATTACCTTCCACAAGGCGGCGTCTCTAACAGTTTAAACGAGTGCCCTAATCATTATTATAATA  
AATATATCCTATAACGAGCGAATATTTTCAGCAGCTTGGTTTATTAGTTTTTATACTGCACGTGCTACGTC  
GGGTCTTTTCAGATATCAATAAAACAGAAAATGCCAACAACCATGCTAGATATAAAAATAAGTCTTCATACA  
GTTAGTTAGATGTGTTTGGTCGTTTTCAGTACCCTACTGAATCTTTTTGTTGGAATAGAAAATAAGCATCTAG  
ATAAAGGAACAGCTTAAGCCTGAAGCATACACTATATACACATAGAAAAATATACTAATATGTATATATA  
CTCAAACACAAGATATATATGTTTATACATATAGTGTGAAGCTCAATAGAATTATATAGAGTAGCCATAG  
AAACTGTCTAGAGATGTGGAAAGGGAGTTGCTTAATCATCACATAATTTTCATGCAGTAAGATATATGTAT  
GTAAACCGTGGAGAGAAAATTGCCAGAAGCTTAACTAAATATTGACACGACTTTTTGCTTGTATGTAGAAG  
GCTTAAGAACCGTTGTACTCGTTTACTAATTTAAATATGAACGTTATCTACTACATATATATTTTTGGTG  
TCTATATCACATAGCACTTTTTGTCTCAAAGCAATTCAAACAGATGCAGGACTGTTATACAGACACTTCAG  
AGAAATTATACATTATCTTGTGTTAAGTGCTTTTATCTCGGTTTCCCGAAAGAGTTGAAATTGGTTTAT  
ATAATTGCACCGATCATGGGGTGCTGTTTAGTGTGTATGTCTATGTATACAATCATACACACACAAACAT  
ATATATGCTCAAAGAGATTTTATTGCCCAAAGCTAAAATGTATTTGAATCAAGTGGTAGAAAATCTTTGTG  
TGAGTTTCGTGTTCAATAATCCTTGTTTAAACTCAGCTAACCCCTATTCCCAAATGTCTATATCCTTTTC  
TTTCTGTATATTAAGTTTATGAATAAGTTGTAAGCAGTTTTTTTTTAGTGTCTCATTCCTTTGGTGTATA  
GAGAAACGCAAAACGTTATCGAGGTTTCAGATACTAACAGTTGTTTTTTCTTCATGTTTATATGTACACAG  
AACTTCGACGTTAGCATTCCGAGAAAATCCATAACTTTACAAGTAAAGTCCATATCTTTGCGTGAAAATAAC  
ACTAGCATTTTTGTGCGAAAAAGATCTCAAACGTGAATAGTAACTATATACGAGAAGAAGCCAGAATAAAT  
TTACGTGCTATTTTTGTTCGATTTATGATCTTTTCAGACTTCTAAACTGCCACTCAGAATTTAAAAAGACA  
CGCCCACTAATCCCTTCTATCTAAGAAATACTTCTCGCCGAGGCCAATCAGAGCGTGGTCTGGAGAGCAC  
GTGTGATTGTTTATGGTGAGACTCCATGCATTTTCGTGCCGCATGAATCGGAGCAACTTCGATTGAGAACGA  
AAATACACACCGTATTACTCTTCATTGGTCGGGCTTAATAGGGACATATTTACTTCTCATGAAGCAAAGA  
CATGGCAAGGTTTCATTTTCGAGTTACTCGCGGAAAAAGGTTCGTATGAACTATCACTTAAGAGACAAGAG  
GTATCACCTTATAACAGTACGAGAGATGGGTACTTTTGACCATGGGCTTAAGATCTAGCGGATCCAGTTT  
GTCAGTATTCTGCTGACATATTAATCCATTACTTTTGTTAAAACATAACGTATGATGTTTCACGGCTTTC  
CTTTAGCTAACAGAAAACATCCAAACGCGCAAATTGAGGGGATAGGCTTATGTGTCCCGAACCACTCCTA  
AAGGGGGTTTATTCGATTTCACTATGTTGATTGAATTTTCCGACAGAGAACAGTTATTATGACATAACTG  
CCAAAGTCTTGGTACATTAGTGAAAAGAAGAGAAATAGGTATTAGTTCTAATAAATTATTATTATTATTGG  
ACATTAAGACTAATAAATCTCAAGAAATAGAACGTACGTGATTTTTTGTATTAAAGACCATTTTGTACGA  
TAATAAGTTTATAATTATTAAGAAAGTGACACTTTAAAGGAAAGGTGGTTTCAGTTTTTGGTTAGATCGGTC  
ACGGAATATGCACTTGTAGTAAACTCAGAACTGACCAATAGTAATACTCTTCAGAGTTACATTTCGTAATA  
ATGCTCTTCCACTGCTACACCTGGAATTTGTGATAAAGAACTCGCGGTTTCATTTTCACTCGCAGTGTTTT  
TGCTTGTGACATAGATGTATGGAAGTTGTTAAAAGTCATTGCAGTCACGTGCAATATATTCGTATCCTAT  
TGGCCCGAACAAATTCAGGTTACTTTAATCAGGCCTAATAACACACACATCTGCAGTAGATTAAGAACTGA  
CATGCTTTGTAGTGTAGGTTAGAAGCTAGCAGATGAATGACAAGTTAGTTGGTAGTTTCTTCATTTG  
ATTATTTCCATGACAAGTGAAATAGATTCTTGTTAACAGATGACACGATAACAAAATGACAAGAACTTCA  
TTATCTTGAATAAGTTCTAAACGGAAGGCGCTGGATAGCTTAAACTTAATATCTTATGTGTATGACCTC  
CCGCAATTATGTGCTCACTCCGAGAAAATATAACGCCTCCTGGTGATAAAGATTTTTTCAAGATTACTTTGT  
CTTTTGTAAATTTAAACTCACGACGAGATATTAGGAATGCAATTCTCTGGAGAGAGTTTGAGATTTAATTA  
TGGGCTTTTATTAAAGAAAAATTACGCCGTTTTTAAAGACAGCTTAGTTTCATACTTTCAGAAATGGAGGAC  
CACATTGTTGTAACAAACTCGCTATAGGTTCATTAAGATCAGTATAGATATTGTTCTATTAGTGCAACGG  
TTTACTTGCACGCTTTCACAACGTTGTAATCTGTAAATTTACTGTAGACCCACAAAGAAGCATTAAGGT  
CAAATTGAAAAATCAAATAACCAAGTGCCAAGGATTTTTTTTTTAAATATTTGCATCAACAAAGAACTTA  
CAAAAATTATAAATGTAATGAGACACGGGAAGACTAGTTTTTATTTTCTGTTTAGAACTATGCTACTGAAG  
TTATCTACTGTGATCCCTAACATTGAACTATTGACCAGAGGGAAGAAAGACAGTCAGCAGCACCCCTACCA  
TCAACTGTCCGCGCTAAGGGATTGACTGTAACCTCTTATAACGCTCACCAACTTAATGTGCTCAAAATATT  
TTGTGGTATCGAACGAATTCGAACCCGGCTCGCCAGCCTCGCAATCCAGAGTCCCACAACGGGTCCAACC  
GACGTCCAATAAGAAACGAAAAGTAGAAAGAAAGAAAGAGTACAACAGAAACAAATATACAGATAGACAG



ATAGAAGGATTTACCGTGGAAAAGTCGTAAATTATTTCAATCATATCAGCGGGAGTGGTAATGTTACTGGG  
TCTCACATCTTGAAGAAGAAAATGGATTTATTGTATAAACGTTGTACAAAATATGTTGTCGACAAAAACA  
GTTTCATGAAATTCCCGATGTCTGTTAACCACAGTGTATAGGGCAGATTAACCTGCCACAGCTCTGACA  
AAGTGACGTGTATGTGTACATGTATTTTCGTATCGAATATGAAAAATGTGCATACATTATTTATCTTTT  
CGTTCATATCACTGTAGATGTTATAGTTTCTCAAACTAATATATTCGCCCAGTTGCATAGTTTTCTT  
TAAAAGAGAGAAGAAACGTTTGAATGACAGCTCTGGTAGTGTGACTATAATGAATTATGCAAGAATAGAG  
GACAAATTTTCAGGGGAAAAGAAATCGATGTTATCACTCGGTCTTCAGTAAGTAGTGTCTTATAACGCTAAG  
CGTCTTATTCTACTGAAGAACAAAGAGATAAGCTAGGCCTTTAATCCAAAAGGAAGGCTTGTCTGATTTA  
GATTGGAAGAACCACCGTGCCTGATGGATATCACTGTGTGGGTATGTGAAATGTATTTTTCTGCTACCGAA  
TTCACTTTTCTGCTTGTCTATTGATTTAAGTTTCTTAAAGTATTCAGCTTCTGATAAAGTAGTTATATAAA  
GCAATGCCCTTTCTTTTGTTTTTCGTATTAATGTTTAGTCGCTTGTTTACTTTTAAGCGCAGAGCCACAC  
GATGGGGTATCGGTGCTCTGTCCACCGTGGTGGACCGAACCTCAGATTTTAGAGTTTTAAATCTGTAAAT  
CTGCCACTGACACACCAGGATAATGTGTACTTACTGGTTTTATATTGATAGTTCCTCAGATACAACAATC  
AAATGGAATATTCAGTTTGTATAGAATTAGAGAGATCTTGATTTTGAGAAATTACAATAACTCCTTCCCA  
AATGTTTTCAACTACTGAAAGATAACAGGATCCTTATTAATCAACACGTCTACAGGGCTTAATAAGAG  
CAATGTTTTCAACTCTATTAAGATAACAGGATCCTTATTAATCAACACGTCTACAGGGCTTAATAAGA  
GCAATGTTTTCAACTATTAAGATAACAGGATCCTTATTAATCAACACGTCTACAGGGCTTAATAAG  
AGTAAATAAAACGAAAAATTTTTTTTACTCTCGTTTTTTGCGATTGAGAATTTCTTTTGTCTTTTGACAAT  
TCGCGAATTTATCTATCAGTTATTGTTTCATGAGACAATTTCTACAATTGTGTTTTATTGGTTCTCAAAA  
TAAACATATACAAATATAACAACGTTTCTTAAAGCGACACGCTATTAATAATGTTAGAATCACGAAGTGCT  
TTGGTTTTGTCCGAGTTTCGGTTTTGTTCATGTTATTTTACATCTTAACATTTTTTGTTCGAGCTTAAACAT  
CTGCTGTCTTCGTTTTCGATATAGTGTATTTTATACTTCCTGTTTATTACATGAAATTGTAAAGTATTC  
TTTGTGGATCTGTTTAACATTATTTTCTTTCTTTCTTTTGTCTCCAAACAAAATAATATTATAACAAG  
CATGCTCCTCCCATTTGGCATAGCGGTACGTTTGCAGAGTTACAACGCTAGAAACCGGGGTTTCGATACCT  
GTGGTGAGTAGAGCACAGAGAGCTCATTGCGCAGCTTCGTGTGTAACTTTAACTGAACAACTAAACGAA  
CATAACTGTATAGAAAAACAACCATTTGTTATTGCGGGTACAACATGTGGTGTGTCAACCAGACACCTT  
ATATAACACATCGGTAAACGGCCAGGTTAGAAACTTAAAGACTCAATCATAACAATCCTTAATTTCCAAC  
CAACGACATCAGTGAAGAGATGCAGTCAGTAGCACCTACCGCTACACCTAACAAAATCTGGAGATTGAT  
CAACACTTTTTATCACATACTCATATCTGAAAGTACGGAGTATGGTAGCAAATCATGGATTGGAACCTCGG  
ATCTTCTGATCATCCGCTCGATATATTAACCACTAGGCCTTTCTATATAGCCCTCAATTATTTGCATAA  
GTAAAAAGAAAACCTGTCTGTAGCAAATAACATACTTTTTTTAATGTGTATAAGTAAAAACATAATTCAT  
TCGTCAAGTGGTTGCAATACTCAGTCACGTGACTAAAATTTGACCACCCAATGTTATATATAAGAATAAT  
CGATTACCAAGGTGAACTAAAAAATTAAATTTGATTTTTTTTTTTGTGGGAGAGGAATACATAATAACT  
TTATATTGTAATATGAAACAACGTTTTGAATAAAACCAAACCAATTAACAACCTATAATTACTCTGTACG  
AAACATTTTCAGTAGTAGGTAAAAAACAAAAGAGGTAAAATACAAAGCTATTTTTGAAGCTCAACACCTC  
TGAACACCAACAGGGCTGTTAAGAAGTAATACGAATAACTCCATTGGTCCAATTTAATGTGCAGTTAAAT  
GTGGAACCAATTAAGTATGACTAACTCGGTCTTACCTTGACCTCACTTTCTTCATGTCAAAGTAATTGAA  
TGTGCTTTTCATCAGTTTTTAAACAACATTCAGTGTTTAGTGTGTCTTTGAGGTATGCAACCTAGAGGATT  
TAGCTGCTGATCTCTATTATGTGTTAATTAACCCCAAGTATTTGATCTTACACAGTTAGGCCTACACAGG  
ATGTCGCTGGCTTATATTGGTGAGGTACCTTTCAACATATAGTATTGTTTTGCCGACCACTCTTGGTCT  
TATTATTAGTCTCTGAGCTTTAATACGTCAAGGAAAATTAAAGTGAGTTATTTGATAATTTAATTTACAC  
ATTTTCATATTCTGTTTTTATTAAGCGCAAAAGTCGCATAATGGGCCACCTGTGCTATGCCCATCACATTG  
ATTGAGCCCCGAAATTTAACGTTATAAACCCACAAGCTTAGCTCTGAATTGCAGTATGGATGGCGAAACT  
TAATGGTTTTTTGTTTTAAGCAAAAAGCTGCATAATCGGCTATACACCTTCTGTCCACCATGGGAAATCGA  
GCCTCAGATCTTAGCATAGTTAATTAGTAAAGTTACAACCGGCACATCGGTGAAATTAACATTATTGAA  
AAGAATGAATGAAACTGTAAAGTTGTCAAACTACTAAAGTCAATCAGTCATTACGTTTCATAGTATTTT  
GTGGGTAATTTAGCAACGTCATACTTTACATTAGACAGAGTGATTCAAAATCCAGCAATAATTTGAATG  
TGCAGAAAAAGTAAAAATTTCTTCTCTCTTTCTCTGTGTAATTTCCATGTTGAGACTGTTTTATAAGGTGT  
TATACTTTGTAGTTGACACAAATCTTAAATATCAAAAGATAACAGCCGCAATATATATTCTCTTTGTCT

TAAAAGAACTTTTTTTTATTTTCGTGAGTTACGTTATTTGAACTGTGTGTGTGTTAAGCTTAAAAATAA  
ACTGAAATGAAGAAGTGATTAGTTTTTTGAAACATCTATAAACCCGGATCTGTCAGTTAAGTTATTTTGA  
AATGCTGCGGTATTTTCCCTGGTGACAACAGAGTGTACAAGATACATCTAAAGAAGCACGGATGTTGGGT  
TGGTGTGCTGGCACAATTCTTGTACGTTCAAATACCTAGTCTCTTCAGCTTATCTGCTGGATAATTG  
ACAAACCTATCTTATTATATTATAAGAAACAGGCACGAGAAACAGTGGTATTAGATACATAGAAAACG  
TATTTTGTCCTTTAGAAGAGTTCGGTATGACAAGGATATTAAGTGTGTTTGTTCGAAAGCCTGTTATCTA  
ATACATAGTTGAGAATTCAAGTATTTGTTGGTTTTTACCATTTGTTTTCATGTTACGAACGGATGGACAT  
GGATTGTGTTGACAATGTATTGTGTATTAAGAGCAAACAATTAAGATTATATTGCTTTTGTTTTTTTATA  
TTCCGGATACAACGTCAGACCATTATCAACTTTCACTTGTATGAACCATATACAAAGATGTATTGATAAA  
AGCCAATTAATAATCTAGCTTTAGGTAATGTGTTAGTTATTTTAACTTTGTGTTATTGTCTCGTTTTTA  
AATACATCCTAGTTTTTGTCTATAATTTAAAAAAAACAAACAGTGTCTGCTAGTCCATCTGAATATTATGC  
TTGTTTGCCTATGTTTTACCCAGAGAAATGTTCTATATATGAGTGTATAGAATATTCAAACCTAGATTAC  
CAAGAAAATATAATCACTTTTATTTTCGCGTCCTCGTTTTGCCATGTATTTAACATTACCAAACCTCAAC  
TGACTCTATTTTCCACCTTCATTCCCCTTATGTGCCTAGTATTACCAAATTTCAATGATACTTTGCCC  
GGCATGACCAGATGGTTAAGGCACTCAATTCGTAATCTGAGCAAATAAACAAATGATACTTTCCACTTTTA  
TTTTTGAGCTTTCATTCTTTTCCACACATTTGGAACTACTGGTTTATGTATTGCTGTAAAACATAATT  
ATAACTCCATGTTTTGTTTTTGTCTTTGTTGATACTTGAACATAAAATAAAATATCCAGTTGAATTC  
ATTTTCTATACATAAAAGGAACCGGCTCCAAATGGCTGAATTTTAAACGAGCTTTCCTATTAGCAGAAAA  
AATTAATCACTTTCAAAAATGAGAAAAAAAATCGAATATCTTTTGTATAACAAACGTTCAATTGAATTC  
TTTTTATCGTTACTTGGCTTCAAATTTAAAAAAAAGAGAGAGAAAACAGTACAAAATCATTACACACGT  
CTTCATCACATTGCTGGGCATATTTCTTGAAGTTGCGATATTTATCTATTAAAATCAAGTTTTTCTGAAG  
TGGGTTTAATCAGATGGACAAGACGTGTAATCTTCTAGTTTAAATTCAAACGTATACCTAATCCATAA  
AGCTTGTCTATTTTCTCCACAGGACACAGCGGTATCAACCAGTTGGGAGGCATTTACGTCAACGGACGGC  
CGCTACCTGACTCCACACGACAGAAGATTGTAGAAGTGGCCACAGTGGTGCTAGACCCTGCGACATCTC  
CAGGATTCTTCAGGTGTCTAACGGTTGCGTCTCCAAGATCCTCGGCCGATACTACGAGACCGGGTCCATT  
CGGCCCGGGCCATCGGGGGAAGTAAACCCCGTGTGGCAACCCCGCCGTTGTGAACAAAATCGCCAGT  
ACAAACGAGAGTGTCTTCTATCTTTGCTTGGGAGATTGGGACAGGCTATTATCTGAAGGGATATGTAA  
TAACGACAACGTTCCAAGTGTAAAGTAATATTCAATACGTTAAAAGCCTATTGCACGTATACAACTTAAA  
CTGAAGTTCCCTCATATATACTAAATCAGTTCGAACATTCCGGTATCACCAACGTTCAAGAGTAAATCTG  
AACGGCTTTCTTATTAACCAGCTGTTTAAATAGTTACTAATGTGATACGCGCATGTTTTAATAAAAATA  
AGTTGTTATATATATGGATGCACAATAGACGGTCTCACGAAGGGCCACTGAACAGAGGGACTGATACTTG  
TTTCATTTATTAACGCTAACATTTTGATATATGAGATAACTGGACATGCAATAGTGAAAGAGGTCTTTTA  
ACTCTTATTTAATGCATAGAATTATTGACAATATTTTACGTTAAATTCATACTTTGTTTTAAAGT  
TAATTTCCAAGTTGATTGAGTACGTTGTTTTGAAAACCGAGTTCGAGCTATATACTTGAATATAGTAC  
ATTACTTCACGTATTGTGTATTTGAAACTTTAATTACCAATGCCACTGATATTTACAATACACGTATTG  
TTCTTCTCCTTAGATTAGCATACAGTAACTTTTATCTATAATACCTTTAATGCTTAATTTCTTTATACTT  
TAATATCACATTAAATATAAAAAGTGTGTATAATACAGCGACGAAAATACAGATGTTTTCTCGTTCAAATC  
ATGTGCAGATAAAACGAGCGTTAGAGTTAATAACCTAATACTTCCTTTACTATTACATATTGCCGTTACC  
AGAGAGGAAGATTTTCGTTTCAACATTCAGTGTATATAAATGTATTTATTTTCGTTGATCCTTCGTAGTT  
TGTAATAATTTAGATAATTAATTTTGTATTGTTTTAATCTTTAAAATAACTCCGAGCATCATTTTCTAA  
GTCACGTTTTAAGGACATCGAATATTCACCTGTTATTCTACATTATTTTAAGTTTCGACGTCAGTTTATTT  
TTTTTTCTCTAATTCATGTGCTCATAGTATATATTAAACGTCGTGTAGTAATTTTAGAACACTCGAACCC  
CTGGTAATGCAGCAACATTATATGTTATTGTGCTCTGCAGTGATTGCCCCACATTATTTTTTGTGGTTG  
TTGAATTTTTTCGATAAAGCTACTTTAAAGCTACTCTTCACTATCCCTTCCTACTTAATTTGTAATCGT  
ACGGTAAAGGAAAGGACGCAATTCAACACCATCCACCACAACTGATGCTGTTACCTTAATCGAATAGCA  
AGATAGGATTTGATTGTTTCTCTTAACACTCAAAATAAGTAGCACAAATGTTTTGTTGTTGTTTTCTT  
GAGCACATTAACCACTGGGCTACACCGTTCCCACTTTGGTATTATTAGACATTTTATAATCATTGTGTCC  
ATTTAATATAAATTTTTTGTAAAGACAACCACTAATATTTAGCCTAGTATTTGTTTATAAAGTCAGGAA  
TTCAAGTATTTAATCTTAAATACTTGTTTACTTGATGAATGTTGTAAATGGTCATTCTAAAGCGATGTC

TCACCTATAAGATAAACTCATAAGCACATATCGTGTATGTGTAATGAGAAATATTGGTAGAACAAACATTA  
CCATAGAAGTCTTTTAAGTGTTTTATGTGAGGAACTCAATAAATTTGTAAAAAACAAAGAAATATTTAA  
GATAAATTATCTTCTTATGTGACGAAATTGCACAACGTTTTGGCTATTCTTGGCCACATTCGGTGCTCAA  
TCTTGAATTTAATTAGAACCACTAGGACGAAGTTTGATTCATAGGGTATTAGTGATGACATCTGGGTCAA  
CTGTTAGAAATGTTGTATGATAAAATTATGTAACCTCAGATAAACATGCATAAAATCAAATAGATTCTTTG  
ATTTTAACCGGCTTATATTTAATTCCTAATAACAACCTAGAGAAGTCCCGTCATTCTTTGTTTACACGTCA  
CAACTAGAGAAGTCTCGTCATTCTTTGTTTACACGTCACAACTAGAGAAGTCTCGTCATTCTTTGTTTAC  
ACGTCGCAACTAGAGAAGTCTCGTCATTCTTTGTTTACACGTCACAACTAGAGAAGTCTCGTCATTCTTT  
GTTTACACGTCACAACTAGAGAAGTCTCGTCATTCTTTGTTTACACGTCACAACTAGAGAAGTCTCGTCA  
TTCTTTGTCTACACGTCACAACTAGAGAAGTCTCGTCATTCTTTGTTTACACGTCACAACTAGAGAAGTCT  
CCGTCAATTCTTTGTTTACACGTCACAACTAGAGAAGTCCCGTCATTCTTTGTTTACACGTCACAACTAGA  
AAAGTCCCATCATGTTTTATTTAAATTTTCATAATTTTGCTGAATAAGTTTAGAACCATTTATTTACGAAT  
AAAACTAAATCATCTCTCAATCCAGTTTTAAGACTTGTTTTGCTCGACAGTGCATATGTTGTTACACC  
TAATATGCACAAACGTTTTAGTTTAAAAATGTTAAACCTTATATTCGAGACTTACAGCATGAATAGAATA  
CGCAAACCTCAGAATTACATTTTTATCACTAAGTTATATTATATATGATTTTGTTGGTTATTTTATTTGCA  
ATTTCACTAAGTATTTATGCTGATGTTTTTAAAGACAAAACATTTGCTTAAATTTGAATCCACGAATGAA  
ACTGATCTAGTTCCGGTCCAAGAGACTTCTTTTTTATCAATCAATCTACAGTAACCTAAGGTGTGTAGGT  
TTCAGAATTGGACTTTGAACACACGATACATTAATTTAGGTAAACATTTGTTTAAAAGAAACGTCCTCG  
TGCAGTGAAATGGAAACACTTCTTAACTAGATTTAATGCGTGTTTTTATTTTCAGATAAACATCACACCA  
ACTGTAATCTTTTTCCCGCTAAATGAAGTTTGGATTATTTTCAGAGAAAATGAAGGGTGGTTCCGGTTCCGA  
AGCCATGTTAGCTTTCTTAAACGATGTTTTTTATTCTTTTCGGTGTCGTCGATGATTTTGAAGTAATACCA  
TTACACTGATATACAGCACTTTTAATGCATGTTTTAATGCAAATTAGAACATTGTAATCATAATAAAACA  
GAATATTGCTGTAATGTAACACTAGTAACACCCAGTATAATATAATCGACAAATAACCACTTAGCGGAGG  
AATTTTATCCCTTGTAATAAAAAAGAAATGGTTCAATGTAAGATTTCGTAATCAGTGTGATTTGTAGGAAC  
GCATATCATATCTTCTATTATTAGGTACATTGGTTAAAAAACACAAAAGCAGATGATATTTGGATAATA  
TGATGGAGTACGTTGCTTCGCGGCAGAGATGTTAGCTTCGGAGGGTGTTAATGTGGTACCTCGTGTTGT  
CACAATGTTCCCTACCAGGAGTTTCTGGGTGATTAACCTCTTAAATCATGTGCTAGATCGTTTGCATATCC  
TGCAAATGTAGCAATACGACAATAAAAAAGTTGTTTTCTATCACAACAGATATCAGGGTCTTGAGACGA  
TCATACGTTGGCCGTAATTATTCTTTGTTACCGTCTATCCTTTGGTTGTCGTGGGTTTCAATTCGTTTCC  
TTCCAGCACATTTTTTTTATTATATCACAGTTCAAACCTATGATACTGATAAACCGCAACGTTCCGGTACACA  
ATAAAAACTTTTGAAGACACTGGTTTCACTCATTCTAATTTAGAAGGAAATTTATTAAATTAATGAATTC  
AAAGTTTTGTAGACATAACAAATTAAGAAATCTAAACAATGTAAACTACAGTGATATAAAATAATGTAT  
ATGTTTTGGTTTGAATTTGCGCAAAGCTACACGAGGGCTATCTGCGCTAGCCGTCTCTAATTTTGCAGT  
GTAAGACTAGAAGGAAGGCAGCTAGTCATTACCAACCCATTGCCAATATTGGATTACTCTTTTTAATAAC  
GAATAGTGGGATTGACCGTAACATTATAACGTCCCCACGGCTGAGGGGCGAGCATGTTTAGTGCGACGGT  
GATTCGAACCCGTGACCCCTCAGATTACGAGTCGAGTTCCTTATCCATCTAGCCATGCTGGGCCAAATGTA  
AATGGAAGTGTCCCGGAATAATTTAAGTAATTTATAAATATTTCACTGGTTTATAAAATGTTTAATAAAG  
AAAGGAAAGCGAGGCTAGGACTATTCTTCGAAAATAAATTTTAGGTCAAGATACAATTTACTGACATGTA  
AAATTATCCCTATATATATGATAATATTCATTAAATATAACGAAGATATCAAGGTTTTAATTTACTCAGA  
AAATGCTGTAAACAGTTTAATTCATTGACAATGAAATAAAAAATTGTTTAGTTTAGTAAATTTAACTTGT  
AGTTGTTTTTAGCGACCTTGAAAGAACTGAAGTGAATTATTAATAATTTTTCATTCCACATTTTATAAAG  
AATATTACGTGAAATAAACCTCTCTTCTTCAATCGTAAAGAAATATTAAGTAGATTGGTCATTAATATT  
AAAACGTATAAATGTTCACAATTATCTACCTTATGACGAAACAATATTTTACTTTTCTAATATATTGAAA  
TACTATTTTACGCTTTGGTTCTTTTACGCGCAGGCCCGGCATGACTAGGTGGTTGAGGCGCTTGACTCGT  
AATCTGCTGGTTGCGGGTTCCAATCCCCCTCACACCAACATGCTTGCCCATTCAGCCGCGGAGACATTA  
TAATGTGTGACGCTCAATCCCACCATTTAAAAGAGTAGTCCAAGTGTTGGCGGTGGGTGGTGATGACTAG  
CTGCCTTTCTCTACTCTTACCCTGCTAAATTAGGGACGGATAGCGTAGATATCCCTCGTGTAGATTTGC  
GCGAAATTAAAAAACAAAAACCTTTTACGCGCAAAGCCACAGAATAGGGTATATGTGCTATGTCCAAAAACA  
GAGAATCGAGCAATAAATCTTAGCTTTGTAAACCTTAACTTATCACTTACACACCGAGGTACAAAAACG

CTTATTGTACATACATGTGCTGATTACAGTTTCATAGTGTGCAACTTATAATTTTGTGTAAAAACAGTTTC  
TTGTACATCTAATTCACAGTCACTCAAACGTGAACTTTACGTGAGAAAAACAATTTGTTCTTATGAATAT  
GATGCACCTTACAGTTTATTTTACCAAGTCTCCCAATGGGACAGCGATATCTGTGAGGAAATACAATGC  
CTCACCTCTGAATTCAGTTCTCCCTGGTGGGCACAGCTGATATATAACTAGTTATAGTTTTGTACGAAAC  
AACAATCAGTTAACCACACTTTTCACTGAAACTGAAAATCTACTTTGTGACGTAGGGACCCATTGCATCC  
TTTGATTGCGCGTATCGTCTACTGTCATAGTGCCTTGCAATTTCTCCTATTCAAGGCTTATCAACAAGGG  
TTGGATTAGCAAACCTGAAGAAATACAATTTTATATGGTTAGTTTCTACAGAAGTAAACAAGTGAATGTTT  
CTCAGATTAAATAGTTATTTTCAGGGCATTCTTCTCAGCTAATATTGTAATCCGTATATCACAAATATTCTT  
ACTTTTTGTGATAATTAAGTCATTGTTTAAATTTTCATTTATTGTTTTTAATACTGGAATATTGTGAAT  
AAAACCTGTGTCTTCCAAGGAATGCCTTCAGCAATATCCTGTTATACTCAACACAATGGCCTATGAAGTCA  
CCATAATTTAAAAGGTGTAGCGTACCTGAGGCTGATACTATGTGTTTGGACCTCGGGTAAATATTTACCTA  
AGCAACGCCCATACTCTAAAATTATATACTACATAAGTATACCACGTTAACAAAACTTTTTTAACCGCAT  
AAAAATTTAAAAAGTAAGGAGAACCTTGTCAAAAAATACAATGTGTACAATTTTTTCTAATATAAGATT  
AATTAATACTTTAGCTTGATGTATCTTCTGACACTTCTGTTACTGAATGAACGAGGCTACATTTGATGGG  
TTATAAAATCAGGGACAAGTGAATATAGATACGCAGTAAGAACAGTAAATACCAGTTATTTATGGAAAT  
GAAATACAAATCCAATAACCTGTGCTCCTTTGAAAGATGGACCTTCCTTCTTCAGTTTGCTTCTGAAAGA  
AGAAAGTCCACCTTTTCGAAAGACCTCGGGTTATTGGATTTGTATTTTCATCTCTATCATTACGAAACGTA  
CGTGTATTGTGTTAATCATGAGCTGTTTATGGAATATGTTTATGTCAGTAATAACAACGTGTTGTCAA  
GAACATGGTAAGGTCATTATTGTTTCTGTTTCTTATATTATATATATATATATCAAAGAGTTCATATT  
ATATATATATATATATGATATATATATATATATATAACAGTTATACTAAGTTAAAAGATATAAAGACA  
ATAAACGTAATTTCTTCAGCGAACCCGTATTATTTGTGCGGATCAATTTATTGATGTAAGTAATAAGGCT  
TAATATGAGGTAAGCCAATGCCCTCTGTTTTCTCGGTGTGCTAACAAGGACAATGAAATTGTTATACA  
CTCCCTAGCGGTTACAATAAGCCAATTTCTGGCAACAGTAGGTGGGAAGTAGAAAGTATTTACCGGCAGT  
TAGCCAGCTTGTTCACTGGCTTTGAACACTGGTAACGTTGTGCTGTAACGAGAAAGTAGCGGGCGAAGCA  
AGCGGGCGCTAGTCTGTGTATCGACTTACCGGTTAACCTAGCAGTGTTATAGTTTTTATTGAATGTTACA  
CATTAAGATTGAGTTCTTCTATTAAATGTATTAGGAAGCTTTTTTTTAATAAAATGGCCACAACATTCGA  
TTTATGTAATGAAAATATCAAACCTTTAGTTTTTCAACTTGTAAGTCTGATTGAAACAACGCCATCT  
GTTTTATCCTCACAACTTGGACTCGATTTGTTTAGGGACCTGAATTATGATTAATATATATATTTTTTTC  
AATGATATTCAATTTGATTAATTTCTTCTCTTGAAAATGTGAGATGGAATATGCTAGTAACGATATTTAT  
AAAATTCCTAAGTCTTCAAAGTTTCACGAGAACAGGTGAGTATTTTGTCTCGTACTCACGTGCAAGTG  
CTCGTTCTGTGTTTAAAAATTGAATTGTACAAGTAGTGACCTGAATGATTGATCCATGCACATAATCAAC  
GAAGAATCTATAAGCTTCGACTATCGCGCCAATATATCTCATTATCACACATTATTGTAAACAGTGTCAT  
TACGTCCATTCCTTTTTTTTTTTTTTAGGTTTATAAATCAGTAAGTGTGTCAATTAATAGACCCCTTACA  
TTTTATATTTGAGTTTCTACAGCTACTTACGTCGTTATCTTATGACGAGTAAATGTTCTATTGTTTCTTA  
ATGGGAACGTGTAATCAAACGTCTTTATGTTTAGCAATATTAGTTTACAAGGACTCGTTTGTCTTTCTC  
TCTTCTTAGTTAATGTACAATCAAACCTTTCAAAGTACACACTGTATATCGAAACGTGTCGTTTTTCTC  
ACATCTGTAATGAAATTTTATTTGGATTTTACACCTGGGAATCCAATTACAATGTAAGAAGCAACTAAC  
AATACATGTCACAATACAATGTGAAATGATAGCTTTGTTACTTTGTGCGATGTCCTTATGTTGGTATATT  
TCAGTGGAATTTGATTGAACAGGCTTTTTCGCAGAGTAATAACGTTAGTGTTAAAGTAAAAGTGGTAAAA  
CCTAATACCACTCGAGTGTATGGCTCCTTCTGAATAGCTTTTTTTTAGAGCTAACATTTCTTTGGCGCCTA  
AGGTAAGTAATAGTTATTTATTATGCATATCTTTATTATTAGATTTCGGGACGAACCTTAGCTACAGACTC  
TGGTGATTTCTTCACTGGAACGCAAAGCCTTTAAAAGAGCCGATTGTTTGCTATCCTCTGGTTAAACTCT  
CTATACTTTGTTCCGTGTATGTGTATATACTTACACACACACACAGACATTGTGCATGCAGTCAGTAGCGG  
AAGTAAATTACTACCTCGTGAAGAGACGCAATATTGCCAGCTCTCCGTGCTTAAGCGAGGAAGGAACAAA  
ACTGATATCAATTTCTCGCGGTACGTGCGACGGCTCAGTGTAGGACATAGTTGTAGGAGGAGGGTTGGCT  
CCGGTCCACGACACGTCACTGACGACCTCACTGAGGCTTGGAACAATGCAAACACCGTGACAAAGTACA  
TTACTTTTATAATGAAAGACCACGAGGTGATTTTGTGACGTCTTGAGCCAGTACTGTATAATCTAAAAAGG  
TAGTGTCTAGAGAGTTGTATCCTGGACTTGACGTGATGTTTCAGCGATCCACAGGATGCAATTTCTGATAA  
ATTGTACTTTGTGAAAGCGATCGACTGCCGTTGTATAAGCATATTTAAGATTGTACAACCTAATGAAGGT

GTTATCAAAGTGATATTAATGTTTCAGACTTCAACGCTGCTATTTTTTGCAGAACTGTTTGTTTCAAAG  
CAATGTTAAGTACCTCCCTTTAATGAAATGTAAAGAAAAAAGGCGTATTACATCATTTTATACAGAAGGT  
GTTTGTTATGAAGCACAGTACATCGGTTTGTACAGAAGTTGTTTGTTATGAAGCACAGTACATCATTTTA  
TACAGAAGGTGTTTGTTATGAAGCACAGTACATCGGTTTGTACAGAAGTTGTTTGTTATGAAGCACAGTA  
CATCATTTTATACAGAAGGTGTTTGTTATGAAGCACAGTACATCGGTTTGTACAGAAGTTGTTTGTTATG  
AAGCACAGTACATCATTTTATACAGAAGGTGTTTGTTATGAAGCACAGTACATCGGTTTGTACAGAAGTT  
GTTTGTTATGAAGCACAGTACATCATTTTATACAGAAGGTGTTTGTTATGAAGCACAGTACATCGGTTTG  
TACAGAAGTTGTTTGTTATGAAGCACAGTACATCATTTTATACAGAAGGTGTTTGTTATGAAGCACAGTA  
CATCGGTTTGTACAGAAGTTGTTTGTTATGAAGCACAGTGCATCATTTTATACAGAAGGTGTTTGTTATG  
AAGCACAGTACATCGGTTTGTACAGAAGTTGTTTGTTATGAAGCACAGTACATCATTTTATACAGAAGGT  
GTTTGTTATGAAGCACAGTACATCATTTTATACAGAAGGTGTTTGTTATGAAGCACAGTACATCGGTTTG  
TACAGAAGTTGTTTGTTATGAAGCACAGTACATCATTTTATACAGAAGGTGTTTGTTATGAAGCACAGTA  
CATCGGTTTGTACAGAAGTTGTTTGTTATGAAGCACAGTGCATCATTTTATACAGAAGGTGTTTGTTATG  
AAGCACAGTACATCATTTTATACAGAAGGTGTTTGTTATGAAATACTATAAATATAGTAATGTTTATTAA  
TTTTTAATACGTGTGAAAGTAGCTAGTTACAGCCAATTGGTCACTTAAGGATAGAGAGTTTGTTCTGATT  
AACTACTAGAAAAATATGACTGGAGTTACTGACACTTCTCGAGATTGAAACATTTTTATTTAAAAATATTT  
TTAAAAATCATATCTCAAGTGATTTATTACAGCAAAAATGACTTTATTTCTAACAAAAATAAATATCTAT  
TTGGCTTCATGGAAAAATAAAAGTTTCAACTTCAATTGAGACAGCTGCACGTGTAAAGAAAAGCATGTG  
TGGCGCAGGCGGTAACTTCCAAGCGTGATTTTTTTTTCCGTGTAAGAGAACTTGATTCCATTAATAATCG  
ACTTAGTAACATTTCTTTGTTGCAAGGTGTATGAATAATAGCCAGTGATTCACATTTTCTTACTCAGAA  
GCACATATCGTCTTTCCATTTTCTTTTGCAGAAGTTCTATTTTGTTCCAGAGAGAGAGAGAGTACAAAT  
CACTTAAGGAACAATAACAAGACTTTTAAACATACACGTGTATACAGTTAGTTTTAATCTTTCCTGAGAGA  
TTCTTCAATCCACACGAAACGCTGTGAATTCTTTGGAATAGAATGTGTGGCTAACTTCAAATAGGGCTC  
CCTGTAGTTGAGAGAGTTGTGGATTTTTAAAAGGGCAAAGACTTTATCCTCCAGACTTGAGCGGTAGGG  
GGGATCTGTTAGGTGTTAGTTCTCCTGTTAAAAGAGAAAAAAACATGTATACTTTATTGGAGTGACTT  
GTTTACAGCATATTCGTTGTATGACCGAAAAGACCTGGCCGGTAGAAAACCCAGTATGAAGCCCACAACA  
CATACAAGTGATTCATAGGAAACGGATTTCGTCTCCTCAAGAACTACTTTGTTAAATTTTGCCAAAGCAGAT  
TCCTAATCTTTAAAGTGACAGTGTGCACGAGCTTTCAGTGTAATAACATAGCGTCTCTCTCAAAGCAG  
ACCTTTCATCTGGGGCCCAAAGTACTCAAAACTGATTGAAACAGTTAAACTACTGATGAAAGCAACGTTT  
GACCAGAGGAAGGGAGTGGGGCACAGCTCTCCCAAAGAGAAATTGGACAATAAACACTGGGCATATCATA  
CATCACAACCGACTGACTCCACCAACAGTAGGGTTTTCGGTGTGAAAGCGAGACTTCTAGAGGTGGTTT  
TGTCGATTATGTTTCGACCGTGTCTCGTCATGCCCTTTTAGCACGAGTTCAATAGAGATCTCGCATGC  
TTCTCAACTCTCTTATGGGAAAGTGGGTAGACAACATGTTTAACTCGACTGTGCGAAAAGCAAATTTG  
TCATAACAGCTAATACAGTAGTTAAGCACGCATCTGAATCATTGTAAACCAGATAAATCAGGTTATGTTT  
CCTATCTAGTGTATATAACACGTTATTAGAAAACACATTTCTTTATATGAATATTTTACTTTGCAGTTAGT  
AACGATCTGATAAACATATATCCCAAAGTTTAAATATAGTGTTCCAAAACCTGGTCTGTACCCATACTGTTTT  
TGTTCTCAAACATTATATCGTTGGGCATACTTGAGAACTTAGTCAAATAATAAAAAAATGTTTCGGAAT  
AATGAAAGAACCACAAATTTTCGGAACATATACATTTTGTACTCTAAATAAAGGTTAAATAAAGTTTTTT  
TAACAGTCTTATTTTAAAGTCTTTTTTTTTTACCGAAAGTGAATATGCTGTTAATTCATATGAAATAGT  
TTCAGTCTGTTTCCCTCGCGGAGAAACATATTTTAGTTACAAATTTTCTGACGCTCTCTATAAAGTC  
CTACACTTCTCCCTCCGGAAGACAAGAAAGCATCTAAGCACGAGTGAAAGTAGGGGCGACTATTTAACG  
ACTTTCGAGTCACGCTTATTCAACAAATGTTTCGAGCGTCAACCTCGTTTTTGAGGAAGGTTTTTACAATC  
AAGTAAATAACTCTTGCAGTTGAGTTTTCTTTCTGGTCTGTATATATTTATTATCATCTGTGGGTAAAC  
ACTGTCTTCATAGATATCACATATACAATTATAAGTAATTCTGTTACATATTTATTGTTGTTTGGTTTGT  
TTTTTAGAAATTTTCGCGCAAACCAATACAAAGGATTCTATGCCTATAGCCGCCTCACGTTTGTAACTGAA  
AGACTAGAGGGGAAGACAGCTGGCTATCAATACCCACTGCTACTCTTAAATTCCTGGCTGAATAATGTGGT  
TTAGTCGACCTTCGTATATTACACATACACGCCTAAAATGTGGAACGCTAATTTTCGCAGAAAGCCACGG  
ACCACGGCTCCTCAGCTTCACTGTCCGGGCACTGGTCTACTATTAAAGAAGCTGTTCTTCTTTTTGTTT  
TTTAGAGTTGTCAGCTCTCAATGAAAACATTCAATGTACTAACTGTACTGAATATTGTTTTACTTTTAGT

GGACATCAATTAAAAAGCGTTTTGTGTCGACACATTCCATAAATACACAACGTAATCACAAAATAAAATC  
ACACTTAGATGCTGGATATATTTGTATTATATTAATAATCTAGCATACATATATCTTCAGAACTAATCA  
ACTGTTTTCCGTTATATCCTCAGAAAACGCAAAGGCCTTTTTTGAGCGATTGAAGAACTTTTCGTTTATT  
TACCCTTCCCTGTTTTATACCCTGGCATCTCGTATTTTTTTCTGTTTTGAAGCCAGCGACAAGTCCGAGC  
CTAATAGGCCTAATAGGCCCACTTTTCGTAGGAGTGTTAATACTTTAAACAATGGTTATATCAGCCAGA  
GTAGACCCGGCATGGTCAGGTGGGTAAAGGCGTTCGACTCATAATCTGAAGATCGCGGGTTCGAATCACC  
GTCGCACCAAACATTCTCGCCCTTTAGCTGTGGGGGCGTTATAATGTTACGGTCAATCCCACTATTCTGT  
TGGCGAAAGAGTAGCTTAGGAGTTGGCGGTGTGTGGTGATGACTATCTGCCTTCCCTCTAGTCTTACACT  
GCTAAATGAGGGACGGCTAGCTTTGCGAAAAATTAAAGCAAATAAACCCCTTATACGTAATTGTAAGAA  
AAAAAAGGCCCATAAAACTGCAAATCGGAAAACGGGAAACCACAAATTTGCACGTACCCAACAACTCT  
TCATGCCAAATTTGGTGGAGGTCTATCAACAATGGACGAAGTAATGATAAAAAAAAAAATTCCAAAACGTC  
CATGAAATCAACAAAACCTCATAACTGAAAATTTATATGCATCTCCCTATGGATCCATTGAACCTCCAAAC  
CAAATTTAGTGAAGATCTGTCTTGGGAAGTAGTTACATGGACAGTACTATTATATACATACATATAT  
ATATGCGCACATTTTCATATAACAATTGTGAATTAATGCAGTGCAGCGTTTCACAAGCTATCATGTTTTT  
ACTTATTATTGCAATTTCTAGCTACAGTAATCTCTTATTTATTTACCTACCAGTAAATGGATGGTTGTTG  
ATAAAAAACAAACATGCTTCTTTATTCTAAAGACTACGTGTTTCGATTTTATTCGCCAACGTTGTGTTTTA  
ATTTTTACAGATATTATTAATTCCTCAGAAAAGCTTTGGTAACTGCAGGTTCTCGGGTCATTGTTACCAT  
TGAAAATGGTTACTCCGTTTTCTTTAAGTAACGTTTATGTGGTAACTATGATTTTCTTATTTATCTAGAT  
ACACTATATGGCCAAAAGTATGTGGACACCCGACCATCACACCCGTATGTGCTTCTTGAACATCTCATTC  
CCAAACCATGGGCATTAATATGGAGTTGGTCAGGGCTCTGTGCAGGCCAGTCAAGTTTTTCTACACCAGC  
TTCAGCAAACCATGTCTTTATGGATCTCGCTTTGTGTCTATGGTGAAACAAAAAGGGCCTTCCCCAACT  
GTTGCCACAAAGTTGGAAGCACACAATTCTTTAGAATGCTATTGTTTGCTGTAGCATTAAAGATTTTTCTT  
CACCGGAACTAAAGATTTAGCCCAAACCATGAAAACAGCCCCAGACCATTACCCCTCCTCCACAAAAC  
TTTACTGTTGGCACTATGCATTAGGCAGGTAGCATTCTCTGGCATCCGCCAAACCCAGATTTCGTCTGT  
CAGACTGCCAGATAGTGAAGCATGATTCACTACTCCAGAGAACACTTTTTCACTGCTCCAGAGTCCAATG  
GCAGTGTGCTTTACACCACTCCAGCCGATGCTTGGCATTGCACATAGTAATCTTCGGTGTGTGCGGCTGC  
TCGGCCATGGAACTCATTTTCATGAAGTTCCTGACGAACAGTTCCTGTACTGACGTTGCTAGGCAGTGGT  
AAGTGTGCAACTGTGGACATATGATTTATACACGCTACGCGCTTCAGCACCTCGGCGGTCCCGTTTTGTG  
AGCTTGTGTGGCTACCGCTTCATGGTTGAGCTGTTGTTGCTCCTAGACGTTTCTACGCCAAAATAACAG  
CACTTACAATTGACCGGGCAGCTCTAGCAGGGCAGAAATTTGACAACTGACTTGTGGAAGGTGACA  
TCCAATGACAGTGCCACGTTCAAAGTCACTGAGCTCTTCAATACGACCCATTCTACTGCTAATGTTTGTCT  
TACGAAGATTGCATGGCTGTATGCTTGATTTTATGCACCTGTTAGCAGTGGGTGTGGCTGAAATAGCCGA  
ACCCACTAATTAGTAGGAATGTCCACATTCTTTTGGCCACGTAGTAAATAACCACCATTATTTATTTCTTA  
AAACGATCCCGTTTTAATCTTGTGAATCAGATGAGGCCTGTTGTGGACTGATTGTTATGGTACTGGCTCA  
ACATATTACCAACACGCTCATCCTTTAGTCGTGGTGGCGTTACAATGTGATGCTCAAGCTCACTTTTC  
GTTGATAAAGAGATAGCCCCAAAATTTGGTGGTTAGTGGAGTTGACTAGTTGCATTCCTTCTAGTGTATCG  
CTTCAAACTAAGGACGGTATCGCAATAAGTTATTCTAGACTATTTGTATCCAAATTCGATATTATGAT  
TTGAATATTTGCTTCGTGAGATTATGACAGTCACAGAGTTGTTAAAACGACGTTGTTTCTCTGTGAGTT  
GAATATTTTAGCTGAAGTTTCAAAGTTTTCTCTATTTGTGTTTCCTTATTGTAAATTTACGACAGCGTTAA  
GGCATCTCGAAAATTTCAACTTTATGTTCTAGCCCATGTTTTTGGATTTTTTGACACAGTTCCTTAAGAAA  
CACTTTTGTGAATATTAAAAATTAACGTAATTCAACATCAAACTCAGAGTTTGCCCTATCTTATAAGGCA  
AGTTGGATTTTCGTAGTTAGCTTGGGTACAAAGTAATTTTTACTGTACTTTTCATCAAATAGTCTCACACAA  
TACACTGACGTTTGTCACTTTTGTGAAATTATACTATAGTGAAGAATTTGTACATTATACGTATATTTTA  
AAATTAAAGCGACAGTCCACGTCCCATGGCTAGATGAATAAGGCACTCGACTCGTAATCTGAGGGACGAA  
GGTTCGAATTACCGTCGCACCAAACATGCTCGCCCTTTAAGGCGTGGAGGCATTATAATGTACTGGTCAA  
TCGCACTATACTTTGGTAAAAAGAGTAGCCCAAGAGTTGGCGGTGGGTGTTGATGACTAGCTACCTTCTCT  
CTTGTATTACACTGCTAAATTAGGGACGGCTAGCGCAGATAGGCCTCGTGTAGCTTTGCGCGAAATTCAA  
ATTAAACCAAACGCATTATACTGTTATATTTGACGCCCCGTACATCTTGAAAGTTGTCTGCAGCATACTT  
TCAATTGCAGAAAACCTCGTCATAAAGCTTTTATATCAAAAGTGCAATGCTGCTCTATTTGTGCTTTCTA

TAAGTAAAAAAAAATACAAGGACAATGGTTAGTAGTGTTGAAACAAAAGCGTGAATATCTAGTATTTTTTC  
AGATTCTTGATGCCACACTTTATTTTTTACTTAGATTGAGGCACGACTTATTGAAGTTCTCTTTCTGGGC  
ACTTCTGGTTTCCCAAACGTGATACATATTTTTTTTTATTTCCAGTGCCATTAAGTACAAAATATAACCCCTG  
TCTTGAAAACCTCTAAATCCTTGATTTTCGACACAGCTTTACGATGTGAGTGTATAAATATGTGGCTTTGTA  
AAGAGCTGTCTCATTTTTTTTACAGACCGATCGATTTTCTGTGGCATCAGATTCTCACGAAATGCTAAGC  
AAACACAAAATGTAGTTCTGATACATTCCGTTGCACCGCAACTTCATATTGGCTTTGATTGCCAGGCAAC  
TTGGTGATTTGCATACTCAAAATCGTTCTGATATAATCACTCAAGCATCCGTGTAACGCGAAACTAAGTT  
ATTAAATAGCTGTAACTTGAATCTAGCAAAACGTAGAATATCTAAGACTGTAAATAAAATATCGGATATG  
TAGCGAACATTTTAAAACTTTTACAGGTATCTTCAATTAATCGAGTTTTACGAAACCTGGCGGCTCAAAA  
AGAACAACAAGTGCATGCACAAGCACAAGATGCTGTCTATGATAAACTACGTATACTCAATGGTCAGGGA  
TGGCCTCGCCCAAACCCCTGGTATCCTGGTAGTGCAACATTTGGTGGAATAACCCCTGCTTGCCTCCCTC  
CTCCAGTGACTGCTCCAGTCTCCCTACCGAAAATGGACAAATTTCAGAAAAAGGTAAGAAATAATTTCA  
TATATCTCCCAAGATCATATAAGTGTATATGATACTAAGTTATTTTTTCCCGTTCCATGAGTAAATTC  
ATAAAAAATGTTGTATTTTGTTCGAGTATCATCAAATAACTTAGTGAAAGTGACTTGAAAGTATTAAC  
TTTGCATGAACTGACCAAAGTTAGATTGTATATGTTTAAATCGTGTGTTTAGCATTAAAACTTGAATT  
GGATCTTACGTGACACATAAGCGAAATGCCAGATTTTTTAACTAGGATGGCAATCATTGAGCGGCAACT  
GCCGCTGTTCATGTACTTTCAACCGAACAATTCAAAGAGTGTATCATGTTCAACGGCTTATTACGAGCT  
TAAACCTTGGATATTTTGATTCTGTGGTAACCCCCAGCTCACTGAAGTTATATAAACTATATAGTGGACAA  
TAGTGTGTAAATTATTTAGAATTTTTTCGCCTGTGAATTCAAAAGCACGCACATATATTGAGCATAAAA  
TTCGAAAATTTCGGGCATAAGATTTCAAATAAGTTTCTACGCAATGAGCACGCACTATATATTTATGCA  
TACCTTGTATAGACGTGCATACGTTTCGACAGATACATGACTAAAAGTGTTTTTTTTTAAAGATTCTGAAG  
TATTGTTTTTAGAAAACATGGCGTTTCAGCACAATACGTTTTTGTCTCTACTTCAACAACACCGACAAGAC  
AAAAATAAATGTCCTTAGAATAATCAGTGTCAATTGCTAGCCCAAACAAAACAACTTTCTGTTTGGGGAT  
CTAACAAATATAAAAAAGTCACTTAGTGAAGAGCTGTTTTAGAAGCCTTACTTTGATTGTAATGCTCTGCG  
CATTAACCTAAATAAACTGTGTATGTCTGCTTTGGCTGTGAGGGCTTATGTGCTCTTATTGTTCTA  
ACTGTCTTCGGTATCTCGAAAGGTAATGTTTGCCTAAAAGCATCTACACACTTATGCATATGCATGTCGG  
AATAATACGTTATCTGTGCATAGAACAAATACACGTACACATAGCGTGTTTTTTATTATTATTATCCA  
TGATAATTGTGAAGTGATACTTTTGTGCTGTGATGTGCTACGTTAATAGTTTGTATTCTTGTCTCAA  
GTTAATTCACTCTCGTGTGATTAATTCAATTATGATACTTTTTTTTATTCCACTTGAATAAGCTTTAACTG  
ATTCTATAACATCGTATCAAAAAGAACTACTCGTGTGCGAAGTTGCAAATAGCCTTCAACATGTTTTATA  
ACAACGTTTTTCGACATTTGCAAATATATGTTAACAGATTATTTAATAACATATGGGTAATGCAAAAGTTT  
TCATATGGGATAGCCGGCATTGCCAGGTGGTTTAAGGCATTTGACTTGGAATACGAGGGTCGCGGGTTCG  
AATCCCGTCGCACCAAACATGCTCGCCTTTCCAGCTGTGGGGTGTTATAATGACGGTCAATTCCACTAT  
TCTCTGGTAAAAAAGTAGCCCAAGAGTTAGCAGTGGGTGGTGATGACTAGCTGCCTTCCCTCTAGTCTTA  
CACTGCTAAATTAGGGACGGATAGCGCAGATAACCCCTCGTGTAGCTTTGCGCGAAAGTTAAAAAACAAAA  
ACAATCATATAGGGGGTACTGCAAATGATGTTTAAACACATTTTGGACAACAACGTGATTAATCTTTGCA  
CTGTGCAACAGAACACGTGCTTTTGTCTGTATGTACTTACAAGAGACAAGCTAAATCTGGAGATAATTCT  
ATTGACTTTTACACGGGTTAAATATATGAAATGAATTTGCATCCTAAGTCTGAAATGAATGTTAGTTCTCG  
AATGAAAAAGGTGGACAAATACTGTGTTGCACTTGTGCAAAATACACTGAAATGCTTATAAAATACGTATCC  
AAACCAGATAACACAGCAATGATTTTCATTTGTATATTATAACACTAAAAAAGGTGTTGAAAGCTAACATA  
CCGAAAAAAAAAAGTTCAACAATCTATTTAGCCATTAGTTGTGTATAATTACGTACTACGTGCGATAGTG  
GTGAAGATAGCATGTCTATTCCTGTGTGTTTTGTTTCATACACGTTTGCAGATTGCATTTTAAAAATATTT  
TACTTCATTGTTTTGTGGTCTCTGACACTTTTCGTTCACTTACTCATGTTGATATTAAGTTCTCATTTTA  
TAATTACTAGTCTATCTCTAATATTATAATATGTGTATGTATAAGGAGTTAGGCTTTCCCTACCAAAAAAT  
GAAGCAGTTTTTAAAGTTAGTCTAGTTAAATAGTTTTTACAAGTAACTAACAAACGTGTATAAATCAAC  
CGCACGCTTTAAGGGTTAAGTGTAGGTTAATTAAACAATTCTTTTTTTATTTTCTAAAAATGGAAATATAT  
AATGATATATACATATGTTTCTAGAGTTCAATTTAAATGTAGGTAATGTCTCTTATAAATGTCTTGACATAC  
ATATTTATTTGTAGGCTTAAACAAATAAAAATAAAACAGTGAACAGACGATAATTCAATTTGGGTGTACAC  
TAGGGCAAAGACAGTGGTTGTTACTGTCTTCTTGGGTTTATTTTATTGTAGTTTTATATTCATGACCAGG

ATTATCTACTATCGTCCCTAAATGTAAACTACTAAGTTGAGAAAAGGCATGCATACCAACAAACAATCGA  
CGCTAATGGATTAAATATCACTTTTATAATATACTGATATCTTAAAGTGTGGGGAAAATTTTGTGATACA  
GTCACGATTCGAACCCCGCTCACTTGCTTCTGCTCCAAAATCAGAAATCTCCCGTGTGACCAATACGCAC  
CCTCACATCTTATTTTAATTGTTTACTCCAGTATTACGGACAAAACACCACCTTTTATTCGTATATTCAAG  
TTAACATATATTTGCTATTTCACTTTTTTTTTTTTTTTTTTTTTNNNNNNTTTTTTTTTTTTTTTACAAAA  
TAGCTGTGGGATAATATTTGGAATAGCTCCTCGCACGTGCTTGTCTTTTTTTTTTTCTTTGTGAGTGTGAT  
ATCACACTTGAGTTCCCCAGTGGCACAGCGGCATGTCTGCGGGCTTGTTACTCATAACAAAAGCTTACTT  
TGCCATTATGTTAAACAATAGAAAAACAATGAGTTAATGATGAGGTGGGGTTAGTATTTAGCAGTAAAAAC  
TGTTACTGCATCAGCAGGTGGTGTGTTTTTGGGTGTAATGAAATATAAATTAATCAATTGTGATTGTTAA  
AACGTTTTTACACTTACGAACACTGTACACTACTGCTTTTCAGAAACTTTTCAGAAAAACTTGTATTTGTA  
AAGCTAGTAAACTAAAAAACTTGTATTTGTAAATCTAGTAAATTTAAAAAACTGTATTTGTAAAGCTAG  
TAAACTAAAAAAAACTTGTATTTGTAAACCAGGAACTAAAAACAACCTGTATTTTTTAAAGCTGGTA  
AACTAAAAATAAAAGNNNNNNNNNNNNNNNNNNNNNNNNNNNNNNNNNNNNNNNNNNNNNNNNNNNNNN  
NNNNNNNNNNNNNNNNNTTTTTGTGAGTGTGATATCACACTTGAGTTCCCGAGTGACACAGCGGCATGTC  
TGCGGGCTTGTTAATCATGACAAAAGCTTACTTTGCCATTATGTTAACAATAGAAAAACAATGAGTTAA  
TGATGAGGTGGGGTTAGTATTTAGCAGTAAACTGTCACTGCATCAGCAGGTGGTGTGTTTTTGGGTGTA  
ATGAAATATAAATTAATCAATTGTGATTGTTAAACGTTTTTACACTTACGAACACTGTACACTACTGCTT  
TTCAGAAACTTTTCAGAAAAACTTGTATTTGTAAAGCTAGTAAACTAAAAAACTTGTATTTGTAAATC  
TAGTAAATTTAAAAAACTGTATTTGTAAAGCTAGTAAACTAAAAAACTTGTATTTGTAAACCAGTAA  
ACTAAAAAAACAACCTGTATTTGTAAAGCTGGTAAACTAAAAATAAGTAATGTTTGGCACCTCTCGCAAGAT  
CTTGTGGCGGAAGTATTAGATAATATGGTAAATGTAGCTGAAAGTCTGATAAAGAATGGTTATCGAGAAA  
TGTATACATGTAAAGCATTTACACGTGGATATCACCTGAAAAGTCTTCTTCAGTGAAGACCATGGATTG  
ATCCAAGTGGAACAGATAACCGCTGACCGATTGCTGTTAACGAGACCGTAACTATATATATATATAT  
ATTTTACTGCCATGAAAGAACTTCTTACTATATATGTTTCTACCAATTATACGATATCATTGTTCCATATT  
TAGCAGTTACTTCAATCTACAGAAAAGGTTTTCGTATCATTAGCCCTTCTTTTTTCTGATTTTTTTTGGT  
ATTTGCCACACACACACACACACACAGAGTGTAAATGGAATGATTCCAGAAGTACACGATTGATGC  
ACACACGGGAATCACAGAGAATGAGCGATGGCATATTTATTGATTATACAAAACGTTTTGACAGAAAAATA  
CCAAACAAAAATGATTACGTTGAACATTTGCTAATTTGCATGCGATCTTTTTATGTAAAAGCACATTCCA  
TCTTGTGTTAACATCTTCATACAGATTATCGGTGTGCATTGTGGAATACTATACCAAATGTTCTGTTTTA  
CAAGTTGAACCTTCTTCAATACGACATGTTCTTAAAGGAATGATGTGCTGGAGCAAAATCTGCCTGCACT  
TTTCAGCGTCTAGAGTGCCATCAATTATGTGTAGATCGTATACTGAGACGTATTCTCAAACCTCATACTGT  
TCCCCATTGTAGATGTCATTGACTGCAATACTGACCCATTCTCCATCATCAAATAAACTGTTGTTGGTA  
GATGATAAACAGTTAGAACTTAAATGTGTCTGTAAATAACACACGATTACTCATTTCACTATTTGTGATC  
AGTTATCTATTTTAACATTTAGGATTGGTTACTTCTGTTTCAGGCAGATTTTGAACCTCTTCATGCTAA  
TGTTTTGCTGTTCTAGAGATAATAGTGACACCACTTTGCAGCAAATGTCGTTTACGAGATCTGCAACTGA  
CTTCTTGTCTCTTAAATAACATGCCTTGGTATTCTTAACGCCATTTTGAATAATTTTGGTTTTTACCTAT  
GTGTCTTCTCTATAAAGCGTAAATTAATTTCTCCTATCTGAGACTGATACAAACCCCTACTGAAACATA  
GTCTTTTTTGTAAATTTTATGCATAAACTATACTTCAGCAACCAAATCTTTGATTTCTACACGATTTTTTCG  
CAGCATTTTGTGTTCTGGGAGACACTACTGGACAACCTCTACTAATAGTGGGCTTATTATGAGTGCCTGTAC  
TTTTATATGCTTGTACCGATGTGGCACTTTTCGATTGGTTAGATGACAACCAATCGCATTTGTGAATTAT  
CATTATGTGATTATACTCTGCTGCAGTTTCATTTTCACACAATAAATGGTTGGCATTTCTTTACATGTAAA  
CAATATGAATACATATATTATATGATCTTTAGGCCCATTTGTTTTCATCTTTTCCATAATTAATATTTTCT  
GCACTGAAGTCTACGTGCTTATAATTTTAAAATAGATCTCTGATATCTTTAGTGGACAAAGCGTCTGTTC  
ATTATGTAGCTTTGTACTTATCAACAAAGATGATTGGTTAAAAAGAGACCTCTATCAGAACTTGTTACA  
ATGGAATTCATTTGTAGAACAATAATATATAAACACAACCATTAGACTGAACATAACTGACAAATGAAAG  
ACGTATTACCAATAGAGCACATGAAGTGCAACGTTGTTATTCTAAAACACGAATAACTTGTAAATATCAAT  
GGTGTGTTGTAGCATAGCATTCAATATGGAACAAAATTTAAACGTTTTTTTTCATCCGTTTCGTTTTATATT  
CTTTCACCTCATCTTCTGACATACGTTCTGAGAAACAATAGTCATAAACTCAAATGTTAAGTTATATC  
CCATGTAGATTTGTTTAAACCAACCACAAGTATGTAAATGACCAACACTTTTCTTTGGTGCATAAATGC



ATGTACTGAACATGAACTTGTGTAATCGAGGAATTCAGGTCTCAGTATTAGCTGGACAAGAGACCAGAAC  
ATCCCGTAGTCCAGGTGACATTTTATGATATTTTGACATCTTCTAGGGATACTGATTTCAGAGTGTTAAT  
GATGACACCTTGCCATTTTCAAGATATTTAAATATCCAAGATTGTTGCCAAGATGGGTTACCTCGATAT  
ACAAATGCCAATATATTGGAATCTATATAATATAGAATAATGATTTTGGTGTATATTACTGGGTTTTTGG  
GGTGAATGTTTTACTATTCTGACTACATAAGAAATGTTACTTTGGTACCTTTGAGGAAGCTGTCATATG  
TGAATCTAATAACAATTTTGGACACAAAATTTATTCGCTTAAGGATCACGAGCTTGGTGATTTTCGCGTGAC  
GGAGACCTGCTAAATGTGTTCCATTGTGACTTGAAAACCGTGTTCAATTTCAATGTCTGAAGATATTGGCA  
ATATGAGGACAATCAAAAACAAAGGTACAGTCAAAGGAAAACCTAGAGGTAGAGCAGCCAGTTTGACTTC  
TGGATAAACCATAAAGTAATTATCAATGGTGGGTGTATTTTTTTATCTTCATTAAATTGGATTAAAAACGA  
CACATTTCAAACCTTTGTTGATAAATGCTGAAAATATATAACTAGTACACTGTGTGTCACGGGAAAAAAA  
ACAATTCATTGGTATAATTTGCCAATAACTAACGGATAAAAAAGAAATCTTCCTACAATTGAAGGCGTCT  
TCAATCACAGATTGGTAGTGACAAAATCCAATACTGTACCACAACAAGTCAGTATGGAACACTCAATGC  
CTGGACTGACCTGTAGATTAGTAATGAAAAGGCACATGCTATAATACCTTAGTAAATGGTAGTTGTTACT  
ACCCAGAGAGTTAGATGAATAATGGTGATATATGATGACATTGGTGTATTCGTCCTGCTCCGTCATCACT  
GTTTGCTGAAGCTCCTGTGCTTCTCTTTCTAACGGAATGGACCTGATTGTATCGGATAATGGTTGACAC  
AGGAGCAACAGTGAAGAAAAATTACAACCTGTTGTATCATAACTTTACAGTGGTGCAAAGTTGTGACGCTG  
GAGACGAAATATATACGAAACTATTAACCTAAGCAACTGCATTTGTTGTAGCATATTATAAGAACAAAAGAC  
ACGAGTTGTATGCTTGATATTTGATATGCAATATGTTTGCCAAACCTGCGAACATTAACGTCAAGTAAAT  
GTTTAAAAAATCTAAAACTTACATTTAGAAATCTGTCCAACCTTGACTCACAGGTTTTGGGTAGGAAAA  
GATACAGATCGTATATCTGTGTTGCGCATCACGATGTCATCAGCGATGCTGTTGTCTTCAAGTGACTCC  
ATCTGAGAAACCTCGTTTCGACCAGAAAATATGGGTGGTAAATAGCTCAGTTAACTTGCACACTCTTCTGT  
GGTTGTAACGTGACAAATAATTTCCAGAATTGGTGGACAAAACGACACGAAGCCAAGTGATAATCATTT  
CAACAATTACCTCTCGAAAAAACTAATGATACAACCTGATGTGTGTACCAGTTGATCAACTCACAGATCT  
ACAGTTCTACTGATACACTGAAAACCTGACGTGTGTACCATCTGGTCTACTCACAGATCTACAGTTCTACT  
GATACACTGAAAACCTGACGTGTGTACCAGCTGGTCAACTCACAGATTTACAGTTCTACTGATACACTGAA  
TAATTTAATCGTTTCAGTCCAATGCATATCTTTATCAGTCGTTTTTCCATCAGCCTTTTCAATTTATAAAG  
TCCCTAGACACTGCGTTTGGTTACCAGTAATGGAGAATTATCGTCTTTGAATGACTACTGGTCGTCTTAG  
AGTGGTTTAAAAATTCACGAATATTGATTATTCCTAGAGTTATTCCTACAAATACCATCGTTTAGTAATT  
CTACTTGTTTTTATAACTATCTTATTACACACAATAAAACAAAACCAAACAAACACCAGAATCGGTATTT  
CAGCTTACCAAAGAAATGATTTGTTCCGTTTTTGTATTATTTTGTTTTAAGTATGAATGGTAGATTTTA  
ACCAGTAATGATCCTATAAGTAAGACAAGGTGAGCAATGGATTGTCTGATCCACAGACTTAGTTAGTCA  
TAGGTTTAGAAATAGCATTAGTCAATACATGAGCTATGTTTTGATTAAATTCATGTTGCAGCTGCCAT  
CTTGAATATTTTAAATCCCTCGAGGGTGCCGAGATGGCACCCTCACATCCTCACAGATATAAAAAACCA  
CCAAAACAACAATAACTTTACTTAACTATACTTTTAGGTTTGGGATGGAATCGCGTCTTGGAACCC  
CGACTATAACTTGTAAATCCGTGAGAAACCATACAAAGATACAATGTAAATTTACAATATACACACACAT  
ATACGTACAACACAGGAGTATAGAATAATTATGTTTTTGAAAGTTTTCCTTCAATGAAAGTGAAATATAC  
ACAAAATTTTTGGAATGATTCTGAGCATAATGCCATTTATGGATGTAATAAACTTTCTACATTTTTATAT  
AAAATAACGCCCTTCCCCACCCGGCACAGCGGTACGTCTGCGACTTTTCACGCTAGAAACCTGGTTTTGA  
TACTTGTGGTCGGCAGAGCACAAAACAGCCGATTGTGCTTAACTTCAAACAAACCTGTAAAGTAACCTTGA  
CGTTCTGAAGCGTCCCTGGTGGGTGAGCAGCAAGCTTTCGGTCTCCAAACGCTACACTTCTGTGTTTAA  
AATATATATGTAAAAACGGCTCGTTTGGGTGAGAATTTTTTTTACGCAGAGGACCAAACGAGCTGTTTT  
TACAAATATATTTTTGTCTACAAGTGGATTTTTTCGACATCACTGACTTCTGTGTTCTTTTCGGAACAGCT  
CAGATAGCTCATTGTTTGGCTTTGTGTTGAACAACCTAAATAAACAACAAACATCTTGAAGAAGAGGAAT  
ACCATATAGGGTTAAAAACAAGGAAACACTTTCAAACCAACATGTGTCAAATACAATAACTCTTACACC  
ATATGCACACGAATTTGAGAATTCTGAGTTGTTTTTACTATCAGTAATAAAAGGCTTAGATTTATTCATT  
TTAGCTTTGTTTGTGTTTTTGAATTTTCGCACAAAGCTACTCGAGGGCTATCTGTGCTAGCCGTCCCTA  
ATTTAGCAGTGTAAGACTAGAGGGAAGGCAGCTGGTCATCACCAACCCACCGCCAACCTCTGGGATACTCT  
TTTACCAACGAATAGTGGGATTGACCGTCAAATTATAACGCCCCACGGCTGAAAGGGCGAGCATGTTTG  
GCGCGACGGGGATGCGAACGCGCGACCCTCAGATTACGAGGTGCGACGCTTAAACACGCTTGCCATGCC

GGGCCAACTATCAATGAAATTACGTTGACTTTGTAATATATGTGAAGTCCACGCAAGACACACAAAACACC  
TTCATACAAGAAATGCATCTGTCTCTTTTCGCTATTTTTTTTTCTATACTTTTGTACTTACACATTTTGT  
GAATGTTTTTCGTAAATGTACATAATGAAGTTGTGCAGGTTATGTATGAATGCAATTTTTCTGAGTTAA  
GCGCTATACATGTTATTCGTAGTTTGGTATCGTAAATACACATCGTGAATTGGTTTTTGCTAGATTAATT  
AATACACTGAAATAATTAAGACACAGTGTTATTGTACTGTATATATAACCTAATATTATTCACTTATTTA  
TATAAACGCATGATAACATATATATACACAGAGTCAGTGTTTGTGGTTTGTTCCTTTGAACTACACGC  
AAAGCTACACAAGGGCTATGAGGGGGCAGAAGGGCACTAGCCTTCTTTTATTGAGCAGTGTTAGACGAGA  
AGAAAGGCAGCTAGTCATCATCAGCCGCCGCAAACCTCTTGGGCTACTCTTTCACCAACAAATATTAATCC  
TCATATTATAACGCCACCCACGACTGAAATGGCGAGCATGTTTGATGTAACGGGGATTGCAACTCGCAAC  
CTGTAGAACGCCCTAATCACCTGACTATGCCGGTCCGTAGTGTGAGCGAGCTTTACATCAGGGTTTTCAG  
TCAAGACGCTGAATTCAATTACTAGCTTTTTAAATACAATCTTTTTCTTAAAGTTAAATTTCTTTACCACAA  
AGAGAGTTGAGTGGTTTATTGTGAAACAATTTTGAATAAGCAAAATAGTAAGTCATAGCCGATATAAAGC  
AGTGGTGGAAACAAGATGTATCAGAAGTATATTTTTTGACACATTTTGTGGTACGTAGTGTGACGCGACTG  
AAAGTCGATCACTTTAAAAAGAGTATGTAATAGTCTTTCCGACGAAAATATTCACACACTCAGATCAT  
GGAAATGTGTTCACTTCCGGAATTATAATTTCTGAGATTAAAATATCCCTTATTCTTATTGGCATTGGA  
AAACAAACAGATACGAACCAATTTGCGACTCCAAAGACATATACAAAAAGATCTGCAACAGGTCGTATCT  
CTATCGTGATATGGGCAGAGACACATATAAGACTCCATGAACACAGATGTCAGCGACAAAAGCCGTCCAC  
GTATTCTAAGCAACAGTACGCAACATAATCAAGAAGGATCTAGTCTGTAACAGCGACACAAGTCACGCGT  
ATACAAGGATTTTTCATGAAATATATCTTTAACAGTTCTATATCTCAAACAACCTGGAGAATCAGTCGGGT  
ATTCCCAGCATTTCTATAAGAAAACAAATCCATCAAGTCGCCAAACAGAGCGCCTATTGATTTGTGTGCAA  
ATAAACTGTATAAAAAAGTGTGTGCAAAACCGTCACCCTTTTATACTAGATAGGTTATGGAAAGGAAGCAG  
GAAGTAATAGTGTGCTTTGGACATGACAACCTTACGTTGATGTCTTTTGCAATGGAACTACTTTGTAGA  
GCTATAGTAGAGATGTCAGTTAGAGCATGAACAGATATAGCGAAGTGAAATGTAACGACGTGGTGAGATT  
AAAAGATAGTTTTCATATAAAATATATCCTCAACTTACATATAAATATACTGCCGCACTTTATATTTGTT  
TATGGATTTTCCATTCCCTTCTTTCATTTATTAGGTTTTTGGGTAATTTTCTATTAATAAATTTTCGA  
AAACGTTAAAGTGACCTATAAATTCCGCTTGTACATTTTCAGTAATTTATTGTGAAATATGTGTCTCTAA  
AGAGCATATGCCAGAATTGTAAACATTTGAGCGCATGGCCATTTGCGTACGTGTGTGAAAGGTATATT  
GAAAGGAATTAATTAAGGTTTAAATTAATCTAGACAAAATCAAGGGTTTACAAAAAGGGTTTTCAACTGT  
TAAAGAAACAATTTGTAAAGCACATAGAAAACCTTTAGTTCACGAAATAAATCTTTACTTTTTTGGTTTAAAG  
CATCTTATTACAGGAAAATCTGAACTGATAGTTGAAACTGTGAAACCGTATTGTTTGATGATACAAACTA  
TTTATTTTATAGATCAACTTTTAGTCGACTTTCTGTTTGTGGTTTTTTTTTAAATTTTCGCGCAAAGCTACA  
CGAGGGCTATCTGCACTAGCCGTCCCTAATTTAGCAGTGTAAGACTAGCGGGAAGGCAGCTAGTCATCAC  
CACCAACGCCAACTCTTGGGCTACTCTTTTCCCACGAATACTGGGATTGATCGTAACATTATAATGCC  
CCCACGGCTGAAAATGGAGCATGTTTGGTGCGACGGGGATTTGAACCCGCGGCCGTTGGATTACAAGTTG  
AGTGCTTTAACCACCTGGCCATGCCGGGCAAGTTGACTTTCTACTAGAAATTAATTACCTTTGAAGCAG  
AAGTAAGTTGGCTTAGCAGTTAATTATGTTCTAAATTAATAAGTTTGTTTTCAAATTAGCAAGGAAAT  
AGTTGAATTTCCATTGGATATTATAATAATTAGTTCACTAGCAGTATTTTAATTGACTTGACAGTAAAAAT  
TAATTTGGTTTTCCAGATAATATAGATTAGTAGTTACCTTGGTAGTGAATATTAGGCATTTGGTAGTAGG  
AATGAGACAGCTTGTTTGTACAAATCTCCAAAGTAATCCTGGTAGCACACAGACTTGATGCTAAACAAA  
TAGAAAAAAAATGAACCTAGTGTGTTCTTAAACTGGATCACCGAGTTGACATATAGTGACAATAAAACA  
ATGTTTTTCATTGTTGTATTGTTTCCACTGTACTTCGTTGATTTGCTACATAAATATTATGTATAAATGTG  
TGTTAATTCCTTTGTACATTTGTTTTAACTTTGTAATTTTCCAATATATTTTTCAACTAATCTACTGTG  
AGCATATTTTCTGTTTAAAGTTTCAAAGAATCTTTTACTTTATTCAATTGTTTGCACATCTGTGTCAAG  
TTCAGATACGATAAGCTGTAAAAGGAACAGTGAGCACACCTGTGTTCCGGTCCAGACGTGGCAGACCCT  
TAGGGGTGCAGTAATATCAAGATGACAGTGTCACTCTCTTCCCACCATATTCAGCGGCGACTTTGCCCTT  
CCATCACGCTCCGTCACTCCAGATATGTCACAGTGGCTCAACTAGATAAGCCTAGTTCATATAGACTATG  
GAAGAGATGGGAGTCTTTGGGTGGGCTTCAAACCGTGTCTTGAGATGCTCCACGTGAGTCAATAAGTGAC  
ATCTCCCAGACCGCTTGACGGAAGCCTGTACAGGTGGCCACAATAGGGCAATTTGATTATTTTACCTCT  
GAATTGCCTGAAGCACTGTCACAAGTGGAACATAGACGTACAAAATCTGGTTTCTAACAACATTTTTTTT

TCAAAAATTAGTCCCATATTATCTGGTGTCTAGCAATGACGGATAGGAGAGCCATCAGAGAGATAGTGGA  
TAAGACATCGTTTCTTGACAAGAGGTTAGTTCGCTGGCTATACAGACCGCTCGGTATGTGGTGGTTCGTAAC  
TG TAGTGAATACATGTTTATAGTATTTCCACACCGCTGGTTTGACAAAACAAGTTTTCAATTCATCGCA  
ATTTTAAACTTCGTCAAAAAGAAGAGTCAGTCCTGACAAACATGCGGTTTCACTGTAAAAATTAACATCCAC  
GGTAAAATTAGTTCGTCAAATTACGAAAATTGTAATATTTATAGCAAATGAGCAAATCATTTTGATTATA  
ATTAATAAAGTCTGACCCAAACTTATTTTTGTTTCTTTGTTCTTTTCGTGATGGCTGATGAAGACGAGAA  
ATGCCACGTTTTCTGGAAGCCCATTTGAAATTGATAACGTATTACAGAAGAGAAAGACGCGAAAGGGTGCG  
TTTTTCAATATTGTACATTTTTATAGATGTTTTACAGGAAATTATTCAAAGGAGTTCAAATTCAAATTGA  
T'TCCCCGGTGGGATAGCGGTAAATCTTCGGATTTACACGCTAAAATCAGAGGTTTCGAT'TCCCCCTCGGTGG  
ACACAGTTGATAGTCCAATGTGTGTATACACACACACATTCAACTCACTCAGATTACACTTTCAACAGTG  
TAAAGAATGCACATGTTTATGTGAGGAGATATTAAGACTCTTCTAAATCGACAAATCATAAACCGTTTT  
TCTTTAATTTGGTGTACCAGCAGGTCACATCTTCAATTATTTTCATTGTATTTGTTGTGCGATCTTTAGA  
ACAATTGTAACAAATGCTTAAAGCAGTTTATTTCTTTGAATCTGAAGATATATACTGCTAAAAATTATAAAA  
TTCGAGCATAATATTCAATAAGTCAAAAGCTAAATAAAAACTTCACCAACATTATGTATAAGTAATACTG  
ATAGAATATCATGATGTTTTACCATTAAAGGTTATATGGAGGGAACTTTTATAATGGTTTGATTTTTATCT  
CATAACTTTATTAACTTGTTTATTTTTTAAAATATCTGTTGTCAATTAGATAAAAATCTGCATGTTTAGAA  
TATTTTAGTGGAAGTATACAACCTTTGTTTTCAGGTATAGATCCCAATTTTCTTTTCTTTATTTATTTTTG  
TTATACAGAGTAAGGTTTCGTTGGTTGTGCGAGCATCAGTACAAGTAAGTTGTCAAAACAGTTCCACTTAT  
TTAATTATTGCATTTGTTAGCTTGATTAATCAACTTGATTTTCTATTAACGTCTCTTTAGTCAGAGAGTA  
TGTCGCAGGCACTTGTCACGTTATTTAACTCTTCATTAATGACGGTCATTTATATAGAATCCAGTTTAG  
AAAAGTTCAACTGAGTCAGGTTACATTATGACTGTCTTTGGAATAACAGTTTTTTTTTGCTCTCCAGTTATC  
AAATTAAAAGAGTTCTGAATGCGATCTCACCACCAATACTACTTCTGTATTTTCAGCCCATCTCCTTCAGA  
GAAATATATTTGTACACATGTCAATCAAACCGTTTAAACAAAATGGTTAAACAAGTGGGTTCGGAATATA  
ACACTGAGAAGGCATATAAAATTCAGATCTTGTCTTAGAGTAAATAAATTTTGTCTCAAACCATAGGGAG  
CGTCGTGCGATTAGTGCTTGATATGTTGGACCTACTACCCTATCCTCTCTCTTCGTTGATTAACCTCCTC  
CAACAGAAAAGTAAGAAGGCGGAGCACAATATGACGTAATTTAGACACACCTACTCCTGTGAATTATGACA  
TCTGTGCTTTAGAGATACACGTATTGGAATAGCAATTTGTATCAGATATAAGAAACATCGGCCAGTATTT  
TAAAACCTCTGTTATTATGATTCAATTAAGTCTTTTTCCATTTTATGGATGTTCTTTGTAGGAACTAGA  
AACTCTTATGAACAGTTTTTTAACTGGACTTGTCGAAAATACACGAATTTAAGTAATACTTTTATGTGGTG  
CCATCTACTGATTTATTAATAAACCATCGTCAGTGAGGAAATACGTATATTTCCCACTTTTGATTGGT  
TAAATTATGTTAGTGATGTGTTCTGCATCAATAATCTTGTTTATTACTAAAAATAAAATATAAATCTCT  
ACTATTTATTAGCATTATAGTGTTAAACATTTTCTACAGGTAGATTCAACACGAAATTACTTTGTTAG  
CTAAGTTAACTTAAAATATTTTATTATTTTGGTGGTGGTTTTTTTTTTTTCGTTCTTGTTGTTTCCACAT  
CATATCAAACCTTTATCACGACTTCGAACCCGTAATTATTAGATAAGAGTGAACATTACCGCAATTACT  
CGCGAAAGATGTTTGTGTTTCGCATTGATAAAATTGTTAAAATATTGTGTGTATAATATATACATATACA  
TATTGAACTAAAATGCATTAATACATTTAAAAGTACATATGGCCCTGCAGGGCCAGGTGGTTAAGGCACT  
CGACTCATAATCTAAGGGTTGCGGGTTCGAATCCCCGTACACCAAACACGATCTCCCTTTCAGCCATGG  
GGGGCGTTATAAAATTCGATCAATCCCCTATTTCGCCGTTAAAAGAGTAGCTCAAAAGTTGGTGGTGAGT  
GGTGATGACTAGCTATCTTCCCTCTAGCATTACACTGCTAAATTAGGGACGGCTAACGCAGAAGTCCCTC  
GTGTAGCTTTGCGCGAAATTCAAAAACAAACAAGTACATATTTTCTTTTTCTCCGTATTAATGAATCCAA  
ATTTACACTTACAGTAACTTTACACTTTGCTTTATTTCTATAAAAAACAGTTTCGTATAAAATGGAAAA  
TGGAATATATGTTGTATATACTCTCAATATTTATTTGGCAGCATCTGTTTCAGGCCAAATCGAGAAAGAA  
AGTTTTGAGGTAGCTAAACCCCTTTTCCCCAGACTTTAGCCCTTAGTAATGATGCTGTAAATCTAGAT  
TAATGTGTACTAATACGAGAGATTATGCGCTGGTCATTATTTAGTCATTAAGAGAATAAGATATATGATG  
CATGTGTCGCGGCATTGTATGTGCAAGACTTTCTCCAATATGTCTAACACATTAACGTATTAGGATATGT  
TTAGTGATACTCTAACGATGTATAATAGATGTTTCAATTTGTCTTTAAATAAACTGAAATTATATATAC  
ACACACAAGGTGATCCAGAAAATAAGGTCTCTGGAACATCTGTAGAAGTAGTTCCCTGACAACATTCTC  
TGTGTTGAAAATACACTGTTAATACACACGTATTTGGCAATAGAATAGATCATACCAATGAGATTTATTT  
CATCTTGTAATAATATGCTACCGTTTCTGTACGGTTTGTTGTTTGAAGTTAAGTAGCTGTTTGGGC

TGCTCTGACTACCATGAGTACCGAAACCTGGTTTATAGTGTTGTAAGTCCGCCTGGGGCGTTTTGTGTAC  
GGAACAAACAACAACAACGAAACAGTTATATGTGAGAGTATAATTATTTTTTCTCTACCCTGTACATGCA  
TGCAACAGTCCAGTATAGTAAAGCGAACCGTATTACCCATGACCTTTTATTACTTGTAAGGTTACACAGA  
CTTATTTTATTGTACGCTAACTAGTACACTGTGTAATCTACCATGAACGATGTGTGTAGCTAAGTTCACTG  
AAATATTTATTATACACTAATTTTCCTCGTTTTTCATGCCTTTGTCCAGTCAGATTGAAGCCATCATAATC  
TGTCATTCTGATGATAAGTGAGACGTTTTCAAAATATGTAATAAGAACTTAGTGATGATAAAAAAGAACAG  
GATGATAGAAGACATGACCAGCAAATGATACGTTTTCTTCGTAAACCCAAATCAAACAGTCAGGGTCATG  
GCCAAATTTGGTTGTTTTGTGAACGTTTTGAAATTACCAGATTGTCCTGGTTATCACTGACAAAAATCTTA  
AAAAGTCACAAAGCTAGATTATTTAATGATATAATTCAACTGTGAATAAGAGAAAAGGAGGACCACATTC  
AACAAGTTTTCTCGTTCTCATGTGGTGTTAAAGCAGTATTTGGTTTAGAGTTGGATACCTCGTGACACA  
TTTCAGTTTTCGTATCTTTATTATGTTGGATGCCTTATGCCACAAATGTGGCTCGTTGTTTTTTTATCTTAT  
CATAGCGTTCTCAACTAGCCATTGCAATGTTTTGGAAAGGAGTAAATGCCACAAATGCCCTTGAAATGT  
AAATATTTTTGAGTGGAAGAGATAAGATCTCAGTAATACTGTATAGGACTTTGAACACACTTTCAGTC  
CAAAACGTAACGTAAAACTATAAATTAAAGAGACGCTTAACGTGAGAAGAATCCATAAAATTCCTGAT  
ATATTTAAGTAAAGAAAGTTCTAAAATATTAATTGATTGGTAATGAGTGTGCTTGCTTGACGGACAGTGTTT  
AATAGTTTCGTTAGATTAAACTGATTTAGAAAAAGTTGCTTCCAAATTCATAGCATTCATGAATAAATC  
TTTTGGGATGTGAAGTAACATTATGAAACTAGCCATCTCATATCAGTGTTTAACGGAATAAAAAAGCCG  
TTAACAAGGCCTCTGGTGTTATACATACTGCAGTAATGTGTTGTTCAATATTAAAGTTTTTCATGGTTTT  
CATAAGTTTGAACGATCTTCAACCCGGTTGAAAGATCTCACTTGAGTCTCATATGTAATCCACCATTAAC  
ATGATGTGTAGCTAAGTTTATTGTCTTTTTATTATACGTTTATTTGTACTAAGAGTAATCCACCATGAAC  
ATTATGTAAGCTTGACCTGTTTATTATACACTGATTAGTATACTGTAAAAGCTACCTCGAACATTGTGGG  
TACGATGCAAGCATATTGTGAATACTTATCAGTGTTAACGTGAATAGTAGGAATGCTTTCGAAACTCGGA  
GTGAAGCCTGAAACAACAAATAACATATATCGATTTCACTGATGCAAAGCACGTTAGTAAATGTCTTCTC  
TTTCACGAACTGAAAGGTTTTAGTATTAACAAAAAGAGAGAGAAAACATTAGGCAACTTTCATAGC  
TTAGGCTTATCTGTCAAATGTTTGTTCGTTTGAAAGCTCGCTTGTTCTGTTCAAGTTCAGAGTAATGT  
AGTGAATGGCATCTCTTAGTAATGAACAATGAAAGCTTATAATGATTAATTAGTTCGCGATAATTTACTT  
AAACGATTTGTATTAAAGTGTTTCTACAACAAGATTATAACCTCAATATTACAGAATGAAATAGT  
TGTTGATTTGACAGATGTGTATTTTATTTCTCTGAAATTGGGAATTTTGACATTTAGTAATATTAAATA  
TGTAGGCTTAAGTCGGATTGTAATTACGTTTTTATATATTGTTGGGATTTCTGATAAAAGATAACAAACG  
TGATGAAAATATCTTGTACAGATTAAAGAGGAATCCATGTTATAGACCCAGCAACTAGAAACCAAATCT  
GTTGTTGCTTTAAGTTTCACTAAAGTTAATCGAATACTTTAAAGTTTACGGTTTGCAGTTCTTAAGATTA  
AAATAATTGTTTTGAACTAAAATTCTAAACAAGTGATTTTTTTGTACAATATCAAAACTAGTGACATAT  
GAGGCTGTAAATTGGCATAAGTAATCCTGAAGAGGAAGTTACATTGAAAGTAACCTATTATCATCACACGCT  
AATCAGCCTGGCATGGACAGGTGGTTGAGGCGTCGCTCGTAATCCGAGGGTCGCGGGATCGAATCCCCGT  
CACACCAAACATGCTCGCCCTTTCAGCCGTGGGGCGTTATAATATGATGGTAAATACCCTTTTCGTTG  
GAAAAAGAGTAGCCCAAGAGTTGGCGGTGGGTGGTGATGACTAGTTGCCTTACCTCTAGTCTTACAATGC  
TAAATCAGGGACCTCTGGCGTAGATAGCCTTGGTATAGCTTTGCGCGAAATTAACAAAAACACACACTA  
ATCAGACGATTATGTTTGTTCCTTCAAAATATTATTAGTCTTTTGCCACAGGAATTAGCTTTGCCACAAGCT  
ACCCCTCATTATAATTTAATCGATAGTCTGTGTTAATTGCTTTTATCGAATTTAGTTTTATATTAATAA  
CCTGCTTCACAATATCTATAGACACAGCTGATATCAGGACCTTCAATCTTCTCTCTCTGAAGTGACCT  
AAGTTGACTTTCACAATAGTCTGGCATCGTACACCAGGGAAAGCAGTTCCATTTCAAGTGAATAAACAGT  
TTTGTAGATTTCACTTGCTATTGGAACATAATACTTAGAATCAACAACAACAAAATGCAACCTTGAACC  
CAGAATATATCCCATGCTCTTCTCCAAGTTGCCAGGAACTTAAACAGAAAATACTGTACATTTTTTA  
TGGAAGAAGGAAGTCTTCAACCTCACTTTTCAATACAGCCTTTCAAAGGACCATCTTCACATTCGACAT  
AGTCGAAATTATTAATCAGGTACGAATGCGCATAATTAATTTAGTCGCTGCGTTATGATAACCGAGGTGG  
TAAATTTGATCAGATACGTAATTCATACACTTATGTTGAGATACGTAATTCATACACTTATGCTTAGATA  
CGTAATTTATACACTTACATTCAGATACGTAATTCATACACTTACGTTTACGATACGTAATTCATACACTT  
ACGCATAGCTTTCAAAGTGAGACGAAACGAGGCAAAATATTATATACGTAGAAAATGCAGAAAATATAT  
TCAGATATTTAACTGCTAGTGTTGAGGTGTACGAATGAGGAAGATTCATCTACAGAATCTGGATGTGGTA

GAATTGAACAAAAGTAACATGGCAATTAATGAAATCAAGTAAAAATTAAGAAATACGGTTGCACCTGGTT  
CTATAAGTTAAGTGATACGGTAGTATTTATAGCTATTAAATCTAAATAACATTTGACAGAGTTTCCACAG  
TTTCACATGTGTAGTTCAAATATAACCAAGATGAATCCGCACTTGGAGCTGTTAAGGTTAGCAGGAATAT  
TAATGATATGTTAATTAGAAAAACAAAACGTTTCTAAGGAATCTCTCCAATAAAATTTAAAGAAGCATATG  
TTGTCAGGCTGAAAACCTACTATAATATTTTGTGTTGTACACATTTGTGTATTTAGGTACATTATATACAT  
ATATAATTCAACTTACAAAGGGAATTGTGATTCTTTGGGGACTATTAAGCCATTTTCTTCACACGAACAT  
AGAATAAATATTTGTCTAATATTTACATTGAATATAATTGTCAAGAGAAATAAACCTGGTTTCATTAAAAA  
TATTTTAGTTTCTAATGTTTTACTCAAGATGAAAAACCAACACCAACAAAACAATAATTTAAATTGGTTTC  
TGTTTTCTTCATGATGCTTTCTTAATACGAACCGAATGACATCAATTGTATACCAACATTGTCCCTTCTT  
GTGTAACATTTGGACGATGACCTTTAATTTGATATTTGATTAAAAAACATAACAACTACGCGTATAGCAAT  
TGTTGCATTACCTTGACCCCTCATCTGTCAATTTAAAAACTACATCTAGGAGGTCCTACTACGATCATAAT  
GTTGTAGGTATATCTATTTTCTATGTAGGTACATTATAAACATTATCTTTGTGTGAATATCTGAAGGAAG  
TACAGCGCTTATATCAAAATAATTTACAGATCTAAGTAAATTGTATGTATGTGTAATTGCTTTAGCCACA  
AGCTTAAACCTAAATGCTTATTTATAGACTTGATTAATAGCATCACGAGATGAAAATACTGAAGTCAAAC  
ATATTTATATTCATTGTAAAGCTTCGGGTTGATTAACCTGTTCTTTAGCTGTATCTGACTCGCTGGGAT  
CATGTATAGCAGAAGACGGTTATACCGTGTAATATACGAAGGAAGAGCTACAGCCAGAACAATAAAACAG  
TAGTAGAAACATACTGTGTACTGTACGAAGGAAGAGCTACAGCCAGAACAATAAGACAATAGTAGAAAAA  
TACTGTGTATTGTACGAAGAAAGATCTATAGCTAGAACAATAAAACAGTAGTAGAAACATACTGTGTACT  
GTGCGAAGGAAGATCTATAGCTAGAAACAATAAAACAGTAGTAGAAACATACTGTGTACTGTACGAAGGA  
GAGCTACAGCCAGAACAATAAAACAGTAGTAGAAACATACTGTGTACTGTACGAAGGAAGAGCTACAGCC  
AGAATAATAAGACAGCAGTAGAAACATACTGTGTACTGTACGAAGGAAGATCTATAGCTAGAACAATAAG  
ACAGTAGTAGAAACCTATTGCGTACTGTACGAAGGAAGAGCTACAGTCAGAACAGTAAGACAGCAGTAAA  
AAACCAATTGCGTACTGTACGAAGGAAGATCTATACTCAGAAAAGTAAGACAGCAATCCAAACCTATTAA  
TATAATGACAGAAATATATATACACGGAAGCTTCAAACCAATCTACAATGGTTTTAAGTAAAAATAGATT  
GATTGATTTTTTAAGATTGATAACCATTTCAAATCATGATACGCGCACTGAAATGATTGAAAATTATTTT  
GAAACGATGGTACATGCACTGAAATGATTGGAAATTATTTTGAACGATGGTCCACGTACTAAAATGATT  
GGAAATTATTTGAAAACAATGGTAAACACACTAAAACGATTGGAAATTATTTTGAACGATGGTACACGC  
AATGAAACCATTTGAAAGGATGCGAAAATCAAGGATCATGATTTAACTTATTTACAGCTGTTTATCGCAT  
AGAACCTGCTGTTTGGTTGAACTTTATTCTAATAAGATAAAAATAAAGTTAAAAATTTATAGAATGAAATC  
TTTACATAATTTGCTTAAATTTGTTGTATTGCTAACATGAGTAGAATTTGTTTGACACAAAATAAACTAT  
AAAATAATGTATTTTCAAGTACTTAACATTTTTCGCTCAACACAATGTTTTTTAGTTTTTTAACTCATTG  
TGTACGTTTTGCGTAAGTTAATCACAAATACGAAGATATTAGCTATTCTGGTTAACATATCCTTTCTTGAC  
CCAACGGCTTCTCTGACTTACGGGCAAACCTGCAGAAAAATTGTACTTTAATGGACGGTAACGACATTGA  
TTTCTGGGGAGACATTTCTTGGCATCTCGCCCTCCTAGCTTGATTCTTCAGCTGACAAGGAACGTGAAC  
GAAAGAAACATCTCCAGATAAAAGCTTTTTCTGGATAAATGTTGGAGTAAAGTGGTCACCATTTTTTTC  
TTCTTCTTAGCACCCCTTCCAATGCCTTACAGAGATGCTTTTGAAAATGGGAGAATAGATAAAGGAACAA  
CGAACAAAATATATGTGTCAGAAACCCGCGCTGATGCGCTGTTTTCAAGTTTACGAACGTAATAATTGAA  
ACTTTTAGCAAGAACGTGCAATGGAAAAATAAACAGAATAATTTTTGTGATACAGAGTGACATATTATAC  
TTTGGAGAGGGAACTGATTGCCTAATTCTGTCTATGACGCATTACACTTTGGAGAGGGAACTGATTGCCTA  
ATTCTGTCAATTCAGTTGTGTCAACTTGTAATTCACACCTGTCTTTTTTTGTAAATAGACGCACACTCAAG  
CACTTCACATGAATTTACACAAAGTTAAGGCTCGGCATGGCGAGGTGGGTAAAGGCGTTCGACTCGTAAT  
CCGAGGGTCGCGGGTTTGAATCCCGGTCGCACCAAACATGCTCGCCCTTTCAGTCGTGGGGGCGTTATAA  
TGTGATGTTCAATCCCACTATTGTTGGTAAAAGAGTAGCTCAAGAGTTGCTGGTGAGTGGTGATGACTA  
ACTGCCTTCCCTCTAGTCTTACACTGCTAAATTAGGGACAGCTAGCGCAGATAGCTCTCGTGTAGCTTTG  
CGCGAAATTAACAAAAAACAACAAAAACACCACAAAGTTAAACATTAGATTGAGTAACAAATAACATAG  
CTTTATTTTATATACAAGTGACAGAGTCTGGCTTCTGTATAATGTAACGACGTTTGTTTACGGATCTTAC  
GTTTGGCGAAATGATAAATTTATTTATCATTGATGTCGTATATGACAATTTTCTTAAATGTATATATATG  
TGTGTGCGCGAGACTATCACGTGTTATAACTGCAACTTGTTTTTACAGACTATCTTTTTGAAATATTCTT  
CAAATGGGACATCAGTAAATAAAGTAGTGACGAATGAAATAACCTACCAAAGCTTTTTTATTATTACTG

CGAATGTAAAAGGAAACGAAAAAAAAAACTTACAAAAGAAACATTTTTTTCACTTTTTAACAGAGGGCGAC  
AGTGGAACGGAGAGCTCCAGTCGAAGTGACCCTGGGGGAAGCAGTGATGAAGACAACGCAGCTCGACTCC  
GGTTAAAAAGAAAACGTCAGAGAAATCGAACATCCTTCACACCAGAGCAGATTGAAGCTTTAGAAAAAG  
TGAGAAATTAGAAGACAATAAGTGAGAAAAATATTCATACTATGACAGAGTACAGTATTAAACCTAATAT  
TATATGTATATATATACAACCTCTGACCACCTCTCCCGCACACACACAAAACAATAACAACTATATTCGG  
AATTAGCTGCATCTGTTTGTAAATAGCAATAGATTAATATTTATTATTTCCCTTTATCACTAATGCCATTT  
TACGAAACATTTACATTGCTACCTTGCTTTTACGTCTAAGTTTACAAATCCAAATCGCTTCACCTTGTT  
ATAGTTTGTAACTTTCTAAATTATAAATTAAAGCCTTTTCAATTTGATCCCATTTTTTTATGAATCTTGA  
TGTGTTACTTCAAACGCTTAATTCTGGACACTTCTCTCTATGGTGTGTGTGTCTAGTATACGCTACCTT  
GTTACTATTATCATATGGCGTGTTGTACTTCCATTCTGGTAATTCGTTTGCCTCATATTGCAAAAGCTGT  
ACCTAAATATCATTTGTAATGACGTTTCGCTATCTGATGTATCTAACATATTGAAGACTACGCAATCGACTT  
GCTAAAATATTGGGCATTTTTTATCTATAAATTGCGTACGTATTAATTATCAGAGACGCTGCTTTCAGACAT  
CACCTTGTAAGGATATAATTACCAATATTTTTGTTTTGCAGAAATTCGAAAGAAGCTCATTATCCGGATGTAT  
TTGCTCGTGAACGGTTAGCGGCAAAGATAGATTTACCAGAAGCTAGGATACAGGTAAAAGATGTTTTAGT  
AAATAATATTTAAAAATATATGGGCAGTAATAAACATGAGCTACCTTCAGTAACAACAACGCATTGGTGA  
GTATGGTTTATTTACGATGATAATAGAAGTAGTGGTGTGAATGGTTTATTTGCAGTGATGACGAAAGTAT  
CGGTGTGAATGTTTTATTTACAATGACGACAAAAGTATCGGTGTGAATGTTTTATTTACAGTGACGACAA  
AAGTATCGGTGTGAATGTTTTATTTACAATGACGACAAAAGTATCGGTGTGATTGTTTTATTTACAATGA  
CGACAAAAGTATCGGTGTGAATGTTTTATTTACAGTGACGACAAAAGTATCGGTGTGAATGTTTTAGTTA  
CAATGACGACAAAAGTATCGGTGTGAATGTTTTATTTACAACGACGACAAAAGTATCGGTGTGAATGTTTT  
TATTTACAATGACGACAAAAGTATCGGTGTGAATGTTTTATTTACAATGACGACAAAAGTATCGGTGTGAA  
TGGTTTTATTTTCATTTATAACACAGGCAGTCGTATATAAAGTTTACCTTGGGTGATAACACAGGTGACAT  
ATCTTAGATTACATGAAGCATACATCATCTGTGAGAGAGAGAAACAACAGCATAGATACGTGCTACACT  
TGAGCAGTTACAGGGCAACTTAGATTAGATTCTCGTTTCATACAGAGATATTCTTGCTTTGTTTAGTTAT  
TGTTACATTTTATAAATGTAAGTAGTATGTGCGATACCACCAGAATACATATTACACTGGGAATCCGAGC  
GAAAGNTGACGACAAAAGTATCGGTGTGAATGTTTTATTTACAATGACGACAAAAGTATCGGTGTGAATG  
TTTTATTTACAATGACGACAAAAGTATCGATGTGAATGGTTTATTTTCATTTATAACACAGGCAGTCGTA  
TATAAAGGTTACCTTGGGTGATAACACAGGTGACATATCTTAGATTACATGAAGCATACATCATCTGTC  
AGAGAGAGAAACAACAGCATAGATACGTGCTACACTTGAGCAGTTACAGAGCAACTTAGATTAGATTCTC  
GTTTCATACAGAGATATTTTTGGTTTGTTTAGTTATTGTTACATTTTATAAATGTAAGTAGTATGTCGGA  
TACCACCAGAATACATATTACATAGACTGGGAATCCGAGCGAAAGTAGCTTTCAAATCGTCATAGTTCGT  
CAAATTCCTTTATAAACTGTTGAAAAAACCTCAAAGAATAAGGCTTAGAATCTTGTAAGAAATTAATC  
TGAATGAAGATCAGACTTCTTCAACGTGCAGAGATAAAGAAAGAGCTATTCTGTTTTTCATGTCTAAATAA  
CTATAACTGTGGAAGTCTTTCAGCTCTGTTGCTAAGATAACGCATAACATTACAGSCTGTTTTCTGTCC  
AGGTTTGGTTCTCCAATCGTAGAGCGAAGTGCGCAGAGAGGAAAACTACGGAACCAGAGACGAGCTGC  
CGAGCAAGCCGCTGTAGCAGCCGTCAACACAACACCGGCTCGTCTACCTCTCAACGCCGGCTTTCCCAAT  
GCCCTGTACCCGAGTATCGGACAGCCAATGGCTAGTATGACAGACACTTACAGGTAGATAAAAAATCCGG  
CTGTACTGAACTACCTCTGCACATAAAGCGTTTTCAATTTCAATGACTGTTCTAGGTAGCAAAATTTTATG  
CTATTTGTAAGATGGGCTTTATTTTTACCAATGTTGCGAAATTCAGTTAATATTTGTAATCAGGTAAAAA  
ACACAACAGTTTGACCAGTAAAGAACCATGGTATACTAATAACTATTTATTGTCACTAAATCAATAACGC  
CCTCTACTGGAACCTCAGTGATGTGCTGGTGAACCTACTTTTCAAGTATGTTTAGTTTCCGTGTTATTTTCA  
TTCTTCTGTTTCTTTGTTTGTATGAACTGTTTTTTTTTATTTTCGTAGTTCCATTCTCCGATGTCCAG  
TACTCTATGTCCAACAACATGGGTCTAGTTCTGTCTTCAACAGCAAGCGCCATCTTATTCCTGTATGC  
TACCCCCAGGGAGCGCTAGAAGCTACGATCCTCTGTCACTGGGAAGTTATAGCAGACCATCATGTCTTAC  
CGCACAAACCATATGTCATGCAACCTGTAAATGGCCAGTTTCATACAGTTAACAACGGTAGTGCCGGATCT  
ACGGGTGATTAGTTGTTTTTATATCTCTTTTGTAAAGAGACTGTTTAAAAGTCTAATTTATTGAAATTTA  
TGATTGTTTGTGTTTGTGTTTTAAATTTTCGCGCAAAGCTATAGGAGGGCTATTTGCGCTAGCCATCTATA  
GCTTAGCAGTGTAAGACTAGAGGGAAGGCAGCTAGTCATCACCACCCACCGCCAATTTCTGGGCTACTCT  
TTTACCAACGAATAGTAGGACTGATCGTCACATTATAACGCCTTCACGGCTAAAGGGCAAGCATGTTTGG

TGTGAGGAGTATTTGAACCCGCGGCCCTCAGATTACGAGTTGAGTGCCCTAACTATCTATCCATGCCGAG  
CATGAAATTTACAACTAGTTACGTAAAATCGTATCATCAACTCTTAGAGTCAGTTGTGAAGTTGCTTGA  
ATAACAAGGGACTCGTGATGTTTAAATGTATCACTCCTTATTTATCGATGTTTCAAGGAGCGACACATGT  
CGTGATACTTTAAAAACCTTTAAGTCAAACATGTTCTCTGTGACTCCTGGCTCAGATATCAGTGAATATC  
TCACAATAGATATTTATTTATTATTTTTGATTTCTCTTTACCTGTACAAGTGTGGGTAAAGTCACAAGGC  
TTATTTTATCCGATTACAGTTTAGAATATAATAACAATCGAAACCGTTTCTAAATGAGTTGTGCATGCAG  
AATAACATGTTATCCAAAGCAGTGTGCATTACCAAAGATATACCGATACCAGTGCATAGTTTTCTGTGAT  
ATAAAAATATAGCGTGTTTAGCTACTGAATTGGAACATTGGTCTAAAGTCGGTCTATATGATTTACTATC  
TATTTTTCTCTCAGTTTTCAATTACATTTTAATTTTCATAGCATATAATTTCCAAGTCATTTGTGAAAGG  
TGTGAAAAGTGGACATAAAATCGAAATGTTTATGACAAAAAGTTATTGACCTATGAAAAGCGAATGAAAAA  
ACTGGCAAGACTGAAATCCTTTTCTATGCTGTGATAATTTATGAAGATCAATAACCAAAAGAAGGGGAAAG  
ATTATTATATTTAAATAAAATCTTAACTGGTTTATTCTTGCAATAATAAATTGTTTCAGACCTTCTACTGG  
AAGGAGAATATGGCGCCACTAAAAATTCCAGTCTGTCTGTTAGCTGCGTTCCCTTCATATATGAATACTTCA  
GGATGACGACATAGCTTCAGGTTGAGATGTTTTCTCGAGAGGTTAAAAAATCTGGTTTCCAGTCTAT  
AAATACGACTTCCTAACCAAGGGCAAGAAGCTTTACTCATGAGGTTTCAGTGTTCATTCTCCAGTTGA  
CAAATAAGGTGTGATAAACCTTACCCATGAGGTTCAATGGTCTCATTCCATAGTCTACACATAAGGCACC  
ATAATCAAACGGTGAGAAGCTATCTTGAAGACAGTCAAGAGTTCTCGTTCCCCAAACAATAAATAAGATA  
TCTGAACCAAGGGTGAGCCATCCCTTGAGAGGGGCAGAATTCTTGTTTCTTAGTTTCCAAATCGCTCTA  
TAGCATCAGCATATTTTAAAAAGAAACAATAACAGTTATATTCAAGTTTTACAGAAGAAAAGCCCTTCAACC  
AACTATTCACGGTATTCATTGTGAAAACTCATGTGGTGTATAAAATGTTGTTACTAGTTAATTTTCGTT  
TCTCACTGATATATATTTTGCATTCCCTCGAATAATATTTTTTAAAGTGTACACTATTAATATAAATTCAT  
ACTACTTTTTTTTAAAGCGAATATTTATTTTTTCCATTTATTTCCAGTAAATTTTAATATTTTAAACTGT  
ATTTCTACATATGTTTTTTGTCTAATTTAGGTCTGATTTTCGCCAGGGCTCTCTGTCCAGTGCAAGTC  
CCAGCCCAGACTGGTGAACATAAACATGTCCTCTGCCTATTGGCCAAGAATACAGTGACGTTGGGAGCGTC  
AGAAGCACGTATAGATAGGAAAACGAAAACCTAGCTTTTGACGCCCTTAACGTATTTAACCATAAGGAAAA
